# Supplementary material
Source: Research Square preprint supplement (doi:10.21203/rs.3.rs-7771199/v1)
Supplement: Supplementary file 1 [file 260fd98bd3414de82ed136a0.xlsx]

## Sheet: Co-expression modules of MII 
Co-expression modules of MII from different age groups
Module 1	Module 2	Module 3	Module 4	Module 5	Module 6	Module 7	Module 8
AAAS	ABCC1	GTF3C2	ABCA15	LOC714892	ABI3BP	ABAT	ACACA
AAR2	ABCC4	CAND2	ABCB7	LOC695072	ACCSL	ACTR6	ACTR3B
ABCF3	ABCF1	B3GNT9	ABCE1	RFPL4A	ACTL6A	ADNP2	ACVR2B
ACAA1	ABCF2	CHMP7	ABHD17B	LOC698165	ADAMTSL3	AGPAT3	AKIP1
ACAT2	ABHD2	TGDS	ABHD5	DPF2	ADGRG7	AK4	ALOXE3
ACBD6	ABL1	BMP5	ABRAXAS1	CNBP	ADPGK	ANO1	ARGLU1
ACOT8	ACAA2	GLMN	ABRAXAS2	MAP2K1	AFAP1L2	ARF1	ASCC3
ACP5	ACAD11	LOC696151	ACER3	AKIRIN2	AFF1	ASS1	AUH
ADGRG1	ACAP2	GYS1	ADCY7	LOC114676594	AGL	ATF1	BARX1
ALKBH3	ACBD3	DDX39B	ADIPOR2	AP3S1	AKTIP	ATP11C	BCCIP
ANGPTL6	ACIN1	ANKFY1	AFF4	ZNF620	ALAS1	BICC1	BCL11A
ANXA5	ACSS2	POLDIP3	AGPS	TFAP2D	ANAPC1	BRDT	C14H11orf49
AP4B1	ADAM19	MFN2	AMMECR1L	ASPH	ANKRA2	BRIP1	C5H4orf27
APEH	ADAMTS9	POMT1	ANKRD27	PPA2	ANLN	C11H12orf76	CARMIL1
APTX	ADD2	CSRP1	ANKRD42	NPL	AQR	C13H2orf68	CCDC102A
ARPC5L	ADGRG3	SLC25A17	ANKRD45	ADGRD1	ARF4	C5H4orf33	CCDC13
ARRDC1	ADGRG6	SAP30BP	ANKRD46	HSF2BP	ARHGAP19	C6H5orf63	CDC26
ASTN2	ADH5	LOC705741	ANKRD7	HILPDA	ARHGAP28	C7H14orf178	CDCA3
ATG101	ADORA2B	PPP1R3C	AP1G1	LOC707323	ARMC9	CAMSAP1	CENPA
ATP5F1A	ADRA1A	KCNH3	AP3M2	SSBP3	ARPC2	CBLB	CENPF
ATP5PO	AGA	WDR1	ARHGAP11A	SMARCD1	ASPM	CDC42SE2	CKAP2
ATP6AP2	AGAP1	SF3B3	ARHGAP30	SIX2	ATF7IP	CENPN	CKAP2L
BABAM1	AGAP3	C14H11orf24	ARIH1	MEMO1	ATF7IP2	CHIC1	CNOT9
BDP1	AGO2	LOC705696	ARL6IP1	KLHL1	ATL2	CHURC1	CPLX4
BLMH	AGPAT1	KARS	ARNT	FAM107B	ATP11B	CIT	CRADD
BOD1	AGPAT4	NARS	ATE1	MAPT	ATP2C2	CLIC4	CREB3L2
BPNT1	AK2	UCHL1	ATG12	HSPB6	ATRX	CLU	CSNK2A2
BRK1	AK5	POLL	ATP23	PIP5K1A	AURKA	COL12A1	CXXC4
BYSL	AKAP17A	RFTN1	ATP2C1	LOC696801	BARD1	COLGALT1	DCAF15
C16H17orf62	AKAP2	KCNK16	ATP6V1C1	LOC706970	BAZ1A	DCUN1D4	DCTN6
C18H18orf25	AKIRIN1	TAX1BP3	ATXN3	OLFM4	BBS5	DNAJC16	DGUOK
CA5A	ALDH6A1	RPL11	ATXN7L3B	NUCKS1	BCL2L10	DYNC2H1	DNAJC28
CALCOCO2	ALOX5AP	CCDC149	B2M	COIL	BCLAF1	E2F8	DROSHA
CCDC130	ALS2	MYCBP	B3GNT2	ERO1A	BFAR	EAF1	DUSP14
CCT6A	AMBRA1	CCNH	B4GALT6	CBLL1	BIN3	EBF2	DUSP5
CDK5	AMD1	LOC706862	BCL10	SERINC5	BIRC2	EIF1AD	EFNB3
CENPT	AMPD3	LOC703550	BIN2	CCDC66	BLCAP	EMC4	EIF5B
CHMP3	ANGEL1	SKP1	BLZF1	YWHAB	BLM	EMILIN2	ELMO2
CLPB	ANGEL2	LDHAL6A	BNIP3L	PCNP	BNIP1	ERBIN	ENTR1
CLUAP1	ANKH	RPS7	BOD1L1	PRPF38B	BORA	FABP3	EPSTI1
COX5A	ANKRD10	TLE2	BRINP1	KCTD1	BPGM	FAM110A	FAM133B
CPNE8	ANKRD40CL	IL34	BVES	ODF2L	BRD7	FAM122A	FAM178B
CTSD	ANKRD53	WWOX	C12H2orf88	NEIL3	BTBD10	FAM199X	FAM20B
CWC25	ANKRD54	ZFAND2A	C14H11orf71	OFD1	BTF3	FBXW7	FAM24B
CWF19L2	ANKRD6	GPR158	C5AR1	HELZ	BUB1B	FER	FMO2
CXHXorf40A	ANKS1A	BMP6	CACNA1D	LOC707684	C1H1orf52	FERMT2	FOXO1
CXHXorf40B	ANO4	CCT5	CARS	LOC106998568	C6H5orf15	FMR1	FRAT2
CYP2F1	ANP32A	LOC114679374	CASP3	RFESD	C6H5orf22	FNDC3B	GGA2
CYP2R1	ANP32B	PADI6	CBL	PGRMC1	C9orf72	GAST	HMCES
DCTN2	ANXA4	ATP6V1E1	CCDC173	LOC106993778	CCAR1	GATAD2B	HMG20B
DDOST	AOX1	NCK1	CCDC186	SGCZ	CCDC14	GLS2	HNRNPL
DDX18	AP2A2	ASNS	CCN6	NFYB	CCDC15	GPATCH8	HOMER2
DEK	AP2B1	CALR	CCT2	CCNG2	CCDC18	GSR	HOXA7
DERA	AP3B1	ATL3	CCT6B	SCAF11	CCDC25	GSTCD	HRH2
DGAT2	AP3S2	SDHAF3	CD52	METTL21A	CCDC77	HACD3	HSPB1
DIRAS3	APBB2	ABCB4	CD9	SAXO1	CCNE1	HIGD1A	ILDR2
DMAC2	APH1A	HDHD3	CDC37L1	CCNI	CCNG1	HNRNPH1	KBTBD3
DMAC2_1	ARAP1	FBL	CDK17	PSMD11	CCP110	HP1BP3	KBTBD4
DMRT2	AREL1	STK32C	CEBPZOS	DNAJB1	CDC27	IRF2	KCNJ15
DTWD1	ARF3	ZNF408	CEP70	SWAP70	CDC5L	JARID2	KDM1A
EARS2	ARFIP1	TEDC2	CHD1	KATNA1	CDC7	JPH1	KEG06_p02
ECSIT	ARHGAP27	RIMBP2	CHN2	TAX1BP1	CDCA4	KDM6B	KLHDC10
EHBP1	ARHGAP44	IER2	CLTC	NEMF	CDCA7	KNOP1	KLHL30
EIF1B	ARHGDIA	PFKP	CNOT1	DCLRE1A	CDCA8	KRR1	KMT2D
EIF4A1	ARHGEF3	LIG1	CNTN5	RAD1	CDH13	KRT222	LCORL
ERAL1	ARHGEF7	RIMS3	COP1	TM2D1	CDH3	LMCD1	LHPP
FAM184B	ARID1A	MAP7D2	COPB2	TBPL1	CENPE	LOC100429607	LOC100428370
FAM234A	ARID3B	SSR2	COPS2	BTG4	CENPK	LOC100430578	LOC100428899
FBXO24	ARL15	LOC706496	CPA6	LOC718407	CENPL	LOC106994180	LOC106994178
FBXO7	ARL9	LOC106997972	CPEB4	EIF1	CEP152	LOC106995351	LOC106994756
FCGRT	ASF1A	GPX1	CREB1	SPCS2	CEP295	LOC106996977	LOC106996630
GAS8	ASF1B	CLDN10	CRIM1	PARL	CEP57	LOC106997299	LOC106998043
GATC	ASXL1	GPN3	CSE1L	YPEL5	CEPT1	LOC114670878	LOC106999775
GEMIN7_1	ASZ1	DDB2	CSTF3	NPM1	CERS2	LOC114671733	LOC114670885
GHITM	ATF6	PLAAT5	CTPS1	KNSTRN	CFAP20	LOC114672259	LOC114671907
GLMP	ATG5	LOC106992546	CTR9	CCNB1	CHEK1	LOC114672260	LOC114672705
GPHA2	ATMIN	SRRD	CUL2	RBBP7	CLDND1	LOC114675692	LOC114673050
GPKOW	ATP1B1	PAIP2	DCAF1	RIOK1	CLINT1	LOC114675788	LOC114673344
GPX4	ATP2A2	NMT1	DCAF12	LOC699756	CLK3	LOC114676061	LOC114673890
GSTO1	ATP2A3	CDH8	DCUN1D1	LOC114670905	CMAH	LOC114676163	LOC114675840
GTF2E2	ATP5MC2	LOC114672447	DCUN1D3	PPWD1	CMTM7	LOC114676274	LOC114675950
GTF3C5	ATP6AP1	EIF3J	DDHD2	BECN1	CNN3	LOC114678848	LOC114676011
HAUS8	ATP6AP1L	POLR3D	DDX20	CUL1	CNOT10	LOC693893	LOC114680324
INPP1	ATP6V0A4	CTNNB1	DDX31	DDX59	CNOT8	LOC693932	LOC693464
IST1	ATP6V0C	C1H1orf174	DDX43	ARV1	CNRIP1	LOC697705	LOC693603
ITM2C	ATP6V1C2	C14H11orf58	DEPDC1B	POLB	CNTRL	LOC697761	LOC693699
ITPR3	ATP6V1D	SLC6A3	DGCR8	NFU1	COX11	LOC701473	LOC694062
JMJD6	ATPSCKMT		DHDDS	APIP	CRIPT	LOC705671	LOC696423
JTB	ATXN1L		DIAPH2	MORF4L1	CRTAM	LOC708375	LOC696581
KDM6A	ATXN2L		DICER1	CCNK	CRYBG3	LOC711421	LOC697342
KIAA0825	ATXN7L2		DIDO1	ZC3H13	CSMD3	LOC721591	LOC699918
KIAA1109	AUNIP		DIP2B	CALM1	CTNNA1	LOC722847	LOC701983
LAD1	AVL9		DOK6	U2SURP	CWC22	LUZP2	LOC702037
LAPTM4B	AXIN1		DUSP19	ERG28	CWC27	MAT2B	LOC702389
LMNA	AZI2		EBAG9	DDX55	CYLD	MCC	LOC702823
LOC100424733	B3GALNT1		EDC3	LYN	CYP2C76	MCCC2	LOC704104
LOC100426005	B3GAT2		EDEM1	ZNF766	DCAF6	MFSD14B	LOC709077
LOC100429403	B4GALT1		EFTUD2	DLGAP5	DCLRE1B	MRTO4	LOC709976
LOC106993384	B4GALT5		EGFL6	EDRF1	DCTD	MSI2	LOC712268
LOC106994941	BACE2		EIF2B1	GPATCH2	DCUN1D2	MYDGF	LOC713772
LOC106995501	BACH2		EIF2S3	LPXN	DDX47	NADK2	LOC715804
LOC106995688	BAG6		ENPP5	ASAP2	DEGS1	NCAM2	LOC717790
LOC106995850	BAIAP2L1		ENSA	CEP162	DEPDC7	NCOA3	LOC717831
LOC106996503	BAP1		ENTPD2	BLNK	DKC1	NDRG3	LPAR3
LOC106999648	BAZ2A		EPS15	RFC1	DNAH12	NFYC	LRRC1
LOC107000631	BBS10		ERCC6	PPP1R14C	DOCK4	NRAS	LSM11
LOC114672439	BBS2		ERCC6L	LOC114673224	DOP1A	NUSAP1	LYRM4
LOC114674418	BBS9		ERMARD	LOC106994786	DPF1	PAIP1	MAK
LOC114676923	BCAR1		ERV3-1	CD177	EIF2A	PARD6B	MAPK1IP1L
LOC114678443	BCAS3		ESD	LOC114679352	EIF4G2	PCID2	MAPRE1
LOC114678959	BCAS4		ESRP1		ELK3	PDCL	2025-03-06
LOC114680150	BCL2L1		EXOC3		ELOVL5	PDK1	MCUR1
LOC695050	BCL2L13		EZH2		EPB41L4A	PDS5B	MIPEP
LOC697254	BCL3		EZR		EPC2	PEX2	MIS18A
LOC703074	BCL9		FAHD1		EPRS	PLEKHA3	MLF1
LOC703156	BCORL1		FAM104A		ERCC8	PPP1CB	MPHOSPH8
LOC706528	BCR		FAM210A		ERP44	PRICKLE2	MRFAP1L1
LOC708492	BHLHB9		FAM228B		EXOC6	PRIMPOL	MRPS14
LOC711104	BIK		FAM81A		FAM120B	PSMB4	NELFA
LOC713490	BIN1		FAM98A		FAM126A	PTP4A1	NIPAL3
LOC716074	BLOC1S6		FAM98B		FBXL20	QSOX2	NOP10
LOC720677	BMPR1B		FANCI		FBXL5	RAB27A	NR4A1
LSM10	BORCS7		FARP2		FBXO27	RAP1GDS1	NSRP1
LSM2	BRD9		FASTKD5		FGD6	RCBTB2	NTRK2
M6PR	BRIX1		FBXL18		FGFR1OP	RCC2	NUDCD2
MAEA	BRPF3		FBXO10		FKBP1A	RMI1	NUP153
MAP9	BSDC1		FBXO5		FYTTD1	RNF38	OCIAD2
MARS	BTBD18		FNBP1L		GALNT3	SAAL1	OTUD3
MB21D2	BUB1		FOCAD		GCC2	SATB1	PAAF1
MED8	C10H20orf197		FOXJ3		GLE1	SET	PABPC4
MESD	C10H22orf23		FRS2		GMFB	SGPL1	PCNA
MFAP1	C11H12orf29		FXR1		GNAI1	SH3BGRL2	PEBP4
MKKS	C11H12orf49		G3BP1		GOLGA5	SH3KBP1	PHC2
MLST8	C11H12orf74		G3BP2		GOLT1B	SIKE1	POLR2K
MPP1	C12H2orf76		GADL1		GORASP2	SIN3A	POLR3GL
MRM1	C14H11orf54		GDAP2		GPBP1L1	SLC35D1	PRDX3
MRPL11	C15H9orf43		GFM2		GPR160	SLC48A1	PRKACA
MRPL12	C15H9orf78		GFPT2		GRHL1	SLK	PRR16
MRPL2	C16H17orf53		GGPS1		GRPEL2	SMC2	PRRC1
MRPL21	C16H17orf99		GLG1		GTPBP10	SMIM8	R3HDM2
MRPS21	C18H18orf32		GLUD1		HIST1H2BJ	SNAP23	RAB11A
MRPS31	C19H19orf57		GLUL		HSD17B12	SOX4	RAB13
MSL3	C1GALT1C1		GMNN		HTATSF1	SPTBN1	RALBP1
MSRA	C1H1orf210		GNL2		HTR1D	SSR3	RAMAC
NAXE	C1QTNF6		GNPAT		ICA1	STARD7	RAPGEF2
NCALD	C20H16orf70		GPAM		IFNGR2	STOM	RASL11A
NDST1	C20H16orf71		GPCPD1		IFRD1	TANK	RASSF3
NDUFB11	C20H16orf72		GPD2		INTS10	TAOK1	RBMX2
NECTIN2	C20H16orf74		GPR63		INTS8	TBL1XR1	RC3H1
NEFL	C20H16orf87		GRM4		IQCB1	TCF3	REPIN1
NLRP2	C2CD6		GULP1		IREB2	THOC1	RNF130
NSDHL	C4H6orf203		HBP1		IRF8	TM9SF3	RNPC3
NTAN1	C7H15orf39		HECTD1		ISOC1	TMEM164	RSBN1L
ODR4	C9H10orf90		HIRIP3		ITFG1	TMEM167A	RTF1
OSCP1	CA10		HMGCR		ITPRID2	TMEM218	SAMD1
OXLD1	CABIN1		HNRNPH3		JAZF1	TP53INP1	SAYSD1
PARVG	CABLES2		HS2ST1		KALRN	TPRG1	SCAMP3
PCBP1	CABYR		HSDL1		KANSL2	TYW5	SEC62
PCCB	CACNA1A		HSPA4		KCTD13	UBA6	SH2B3
PDLIM5	CACNA1E		HSPA4L		KDM3A	UBE2V1	SH2D4A
PDZD11	CACTIN		HSPB11		KIAA1147	UBE2W	SLC15A1
PEBP1	CAD		IBTK		KIF18A	UBTD2	SLC35F4
PEX11B	CALCOCO1		IFRD2		KIF20B	WDR41	SLC39A4
PEX14	CAMTA2		IFT88		KIF27	WDR76	SMAGP
PHACTR3	CAPRIN1		IL13RA1		KIF5B	ZDHHC7	SSRP1
PHB	CARM1		INSIG1		KLHL3	ZFHX3	SUDS3
PIN4	CASKIN1		ITGA6		KPNA7	ZNF260	THOC7
PISD	CASP2		IZUMO2		KTN1	ZNF280C	TMEM126A
PLK1	CASP6		KAT7		LCLAT1	ZNF652	TNFSF12
PLXDC1	CASP8		KATNBL1		LHX8		TOGARAM2
PMM2	CAST		KHDC1L		LIG4		TOP1
PMPCA	CAVIN3		KIAA1257		LOC100427680		TP53
POLD2	CBLN2		KIF13B		LOC100429508		TRAPPC8
POLDIP2	CBX1		KLF5		LOC100429512		TRMT112
POLR1E	CBY1		KLHL15		LOC106993227		TSC22D2
POLR3E	CCAR2		KLHL8		LOC106993307		TSPAN7
PPIE	CCDC115		KLHL9		LOC106993353		TUBAL3
PPIF	CCDC120		KMT5B		LOC106994547		UBFD1
PPP1R11	CCDC124		LACC1		LOC106994675		UHRF1
PRR15	CCDC146		LARS		LOC106995487		UPF3A
PRXL2A	CCDC157		LHFPL1		LOC106995726		VPS72
PSMB3	CCDC171		LINS1		LOC106995902		YAF2
PSMF1	CCDC191		LMOD3		LOC106997009		YME1L1
PSMG4	CCDC27		LNX2		LOC106997203		YPEL3
PTCD3	CCDC43		LOC100423287		LOC106997235
RAD9A	CCDC87		LOC100425528		LOC106998502
RASGRF2	CCDC9		LOC100430028		LOC106999829
RBM41	CCDC92		LOC106992311		LOC107000343
RCN2	CCDC93		LOC106993536		LOC114670021
RHOC	CCKAR		LOC106994468		LOC114670385
RMND1	CCN1		LOC106994583		LOC114671034
RNF8	CCNB1IP1		LOC106995580		LOC114672305
SAMM50	CCNI2		LOC106995638		LOC114672381
SCML1	CCNJ		LOC106996136		LOC114673183
SEC13	CCNL1		LOC106997747		LOC114673439
SESN2	CCPG1		LOC106999127		LOC114673836
SF3B5	CCZ1		LOC106999955		LOC114674856
SFR1	CD276		LOC109910386		LOC114675313
SHARPIN	CD47		LOC114671066		LOC114675367
SIAH2	CD5		LOC114672113		LOC114675570
SIRT2	CD70		LOC114672179		LOC114676894
SLC22A1	CD86		LOC114673026		LOC114677504
SLC25A1	CDADC1		LOC114673268		LOC114678803
SLC25A39	CDC20B		LOC114673459		LOC114680325
SLC30A3	CDC25A		LOC114673699		LOC694405
SNAP47	CDC40		LOC114674075		LOC696610
SNF8	CDC42		LOC114674199		LOC697703
SNRPC	CDC42BPB		LOC114674200		LOC698787
SNRPD3	CDC42EP3		LOC114675778		LOC700897
SNTG1	CDC45		LOC114676050		LOC701227
SNX21	CDC6		LOC114676809		LOC701437
SNX8	CDCA5		LOC114677003		LOC703977
SPNS1	CDCA7L		LOC114677483		LOC704010
SQOR	CDH19		LOC114677684		LOC704393
SSBP1	CDH5		LOC114679282		LOC704575
STARD3	CDIP1		LOC694126		LOC706718
STIP1	CDK13		LOC694743		LOC707174
STMN1	CDK16		LOC694887		LOC708443
STRBP	CDK3		LOC698256		LOC709254
STX5	CDK8		LOC698779		LOC711062
TCF15	CDKAL1		LOC698907		LOC712263
TEX35	CDR1		LOC701052		LOC713553
TGFBI	CEBPZ		LOC701819		LOC716188
THAP11	CELSR1		LOC702228		LOC716479
THAP7	CEP104		LOC702864		LPAR1
THTPA	CEP78		LOC707197		LRGUK
THYN1	CEP85		LOC707468		LRMP
TLE6	CFAP61		LOC710661		LRRC40
TMCC2	CFL1		LOC712182		LRRC49
TMEM147	CFL2		LOC712330		LTN1
TMEM216	CHAF1B		LOC713332		LYPD6
TMEM222	CHERP		LOC713879		M1AP
TMEM230	CHFR		LOC715257		MAN2A1
TMEM50A	CHMP2B		LOC715684		MAPK6
TMEM60	CHRAC1		LOC720399		MBD4
TRABD	CHRDL1		LOC720413		MCM6
TRAPPC2B	CHRDL2		LRCH3		MCTP1
TSPAN9	CHST6		LRRFIP1		MED20
TTC4	CHSY1		LRRFIP2		MEST
TXNDC16	CIPC		LSG1		METAP2
TXNL1	CKMT2		LUZP1		MFN1
UBE2D2	CLDN11		MCM8		MFSD14A
UBE2D4	CLEC4G		MDM4		MIXL1
UBE2V2	CLIC6		MEIOB		MOB1A
UBXN11	CLN3		MIER1		MPHOSPH9
UPB1	CLPTM1L		MMGT1		MRPL30
VPS25	CLPX		MOSPD1		MRS2
WDR38	CLSTN1		MRPL49		MSH2
YARS2	CLSTN2		MTMR4		MTIF3
ZBTB17	CLUH		MTREX		MYLIP
ZG16	CMTM8		MTRF1		MYO6
ZMAT5	CNDP1		MXD1		NAA15
ZNF430	CNKSR2		NAA16		NAB1
ZNF581	CNNM2		NAA50		NAMPT
ZNF846	CNNM3		NDEL1		NASP
	CNOT2		NDUFA6		NCAPG2
	CNOT3		NEK2		NCKAP1
	CNPPD1		NF2		NECAP2
	CNPY4		NLN		NELFCD
	CNTN1		NME7		NEMP1
	COPG2		NR1H2		NFATC3
	COPS7B		NSD2		NHLRC3
	CORO1C		NUP133		NHSL1
	CORO2A		OCIAD1		NIPA2
	CORO7		OLFM1		NMD3
	COX7A2L		OPTN		NMNAT3
	CPNE4		OSBPL11		NOL8
	CPSF1		OSTM1		NPTN
	CPSF4		OXR1		NR2C1
	CRAMP1		PARG		NUP160
	CREB3L1		PARN		NUP37
	CREB5		PCSK5		NUP54
	CRNKL1		PDIA3		NUP88
	CROT		PDK3		NUS1
	CRPPA		PELI1		OGFOD1
	CRTC1		PEX12		ORC3
	CRTC3		PHEX		OSBPL1A
	CRYL1		PHF14		OTULINL
	CRYZ		PHF5A		OXNAD1
	CSDC2		PHF8		PABPC1
	CSGALNACT1		PHTF2		PALB2
	CSK		PIK3CB		PAPSS1
	CSNK1E		PIK3R1		PARD6A
	CSNK1G1		PITPNC1		PAXIP1
	CSNK2A1		PIWIL1		PCGF6
	CSTF1		PJA2		PCM1
	CTC1		PKNOX1		PDGFRL
	CTDP1		PLB1		PDLIM1
	CTNNBIP1		PLEKHA1		PEX13
	CTNND1		PLEKHF2		PEX3
	CTSB		PLPBP		PHC3
	CTTN		PON3		PIK3R4
	CUL3		PPEF1		PLAG1
	CWF19L1		PPIL2		PLRG1
	CXHXorf38		PRDM4		PMS1
	CXHXorf56		PRKAB2		POLR2C
	CYB5B		PRMT3		POMK
	CYP2C93		PSMD12		POT1
	CYP39A1		PSMD5		PPHLN1
	CYREN		PTDSS1		PPP1R12A
	DAAM2		PTGER3		PPP2CA
	DAB1		PTPN12		PPP2R5C
	DAB2IP		RAB23		PPP6C
	DAG1		RAB2B		PPT1
	DAP		RAB5B		PRDM2
	DAP3		RAB6A		PRELID3B
	DARS		RACGAP1		PRKDC
	DBF4B		RAD18		PRMT9
	DBT		RALB		PROSER1
	DCAF11		RBFOX2		PRR11
	DCAF4		RNF115		PSMD1
	DCAF7		RNF24		PSMD9
	DCTN1		ROS1		PTGES3
	DCTN5		RPA3		PUS7
	DDA1		RPE		R3HDM1
	DDB1		RRP1B		RAB28
	DDX1		RRP8		RAB3GAP2
	DDX11		RSPRY1		RAB5A
	DDX19A		RTKN2		RAD9B
	DDX23		RUFY1		RAP1B
	DDX46		SACM1L		RBBP5
	DDX50		SAMD8		RBM15
	DDX60L		SCD		RBM25
	DENND1A		SCFD1		RBM46
	DENND2A		SCLY		RDH12
	DGKI		SCML2		RIF1
	DHX30		SCNN1G		RIOK2
	DHX33		SDE2		RLIM
	DHX34		SEC24B		RMC1
	DHX38		SEC63		RNF13
	DHX40		SEL1L		RNMT
	DHX8		SENP6		RPA1
	DIAPH1		SETDB2		RRM2B
	DISC1		SGTB		SC5D
	DISP1		SLAIN2		SDCBP
	DKK4		SLC11A2		SEC22A
	DLG5		SLC35A5		SEC31A
	DLST		SLC37A1		SEC61A2
	DMRT3		SLC39A6		SEPSECS
	DNAAF5		SLC3A1		SEPTIN2
	DNAH17		SLC41A2		SERINC1
	DNAJA2		SLC43A1		SERPINB7
	DNAJA4		SLC43A3		SETX
	DNAJB5		SLC4A7		SF3A3
	DNAJB6		SLC5A3		SGO2
	DNAJC11		SLC6A16		SH2D4B
	DNAJC14		SLC8A1		SHC4
	DNAJC4		SLC9A6		SIDT2
	DNMBP		SLCO1B7		SINHCAF
	DNMT3A		SLX4IP		SKP2
	DNTTIP2		SNX4		SLC19A2
	DOCK1		SOAT1		SLC30A9
	DOP1B		SOCS4		SLC35A2
	DOT1L		SPECC1		SLC44A3
	DPH6		SPG21		SLC7A1
	DPP6		SPIDR		SMAD2
	DPRX		SRBD1		SMC4
	DRP2		SRP54		SNAPC1
	DSCAML1		SSR1		SNX14
	DSCC1		SSX2IP		SNX25
	DTD2		STAB2		SOHLH2
	DTNA		STARD4		SP1
	DTWD2		STAT3		SPATA22
	DUSP10		STPG1		SPICE1
	DUSP12		SUCO		SRP72
	DUSP16		SYNCRIP		SRPK1
	DUSP3		TAF1D		STARD3NL
	DVL2		TAF4B		STAT4
	DVL3		TAF9B		STRAP
	DYM		TBC1D15		STRIP2
	DYNC1I2		TBC1D20		SUMO1
	DYNLT3		TBK1		SUMO2
	E4F1		TDRD1		SUN1
	EAPP		TDRD12		SWT1
	EBF1		TDRP		SYCP2
	ECD		TFRC		TADA1
	ECPAS		THNSL1		TAF6
	EFCAB11		TLN2		TAOK3
	EFHC2		TMED8		TASOR
	EFHD2		TMEM181		TAT
	EFR3B		TMEM214		TENT2
	EGR1		TMEM39A		TERB1
	EHD2		TMEM87A		TFG
	EHD3		TMPRSS2		THOC3
	EHMT1		TMTC2		TIAM1
	EI24		TMX1		TIFA
	EIF4B		TMX3		TIGAR
	EIF4E		TPD52L2		TIMM21
	EIF4G1		TRAM1		TIMM23
	ELAC2		TRIM29		TJP1
	ELAVL2		TRIM59		TM9SF2
	ELMSAN1		TSN		TMCC1
	ELOVL6		TSPAN5		TMCO3
	ELP1		TUBGCP3		TMEM128
	EMD		TUBGCP4		TMEM131L
	ENAH		UBA5		TMEM14B
	EP400		UGCG		TMEM163
	EPAS1		UGGT2		TMEM199
	EPB41		USP3		TMEM255B
	EPB41L3		USP37		TMEM38B
	EPB42		USP4		TMEM70
	EPG5		USP45		TMEM9B
	EPN2		USP48		TOM1L1
	EPS15L1		VAMP4		TOP2A
	ERC2		VPS35		TPP2
	ERCC3		VPS37A		TPX2
	ERCC5		VPS41		TRAF6
	ERF		VPS50		TSPAN3
	ERGIC1		WBP4		TTC33
	ERLEC1		WDR43		TTF2
	ESPL1		WWC2		TUBE1
	ETFA		XPO7		UBAP2L
	ETV5		ZBTB11		UBE2Q2
	EVC2		ZCCHC2		UBE4A
	EWSR1		ZFAND4		UCKL1
	EXD2		ZFYVE9		UNG
	EXO1		ZNF136		UQCRC2
	EXOSC9		ZNF155		USB1
	EXTL1		ZNF182		USP33
	EXTL3		ZNF184		USP36
	EYA1		ZNF248		USP39
	EZHIP		ZNF268		USP44
	F11R		ZNF354A		USP8
	FAAP100		ZNF426		USP9X
	FADS2		ZNF460		USPL1
	FAM102A		ZNF483		VAPA
	FAM104B		ZNF549		WASF1
	FAM118B		ZNF566		WBP11
	FAM122B		ZNF574		WDR20
	FAM129B		ZNF667		WDSUB1
	FAM136A		ZNF680		WTIP
	FAM13A		ZNF684		XIAP
	FAM13B		ZNF689		YES1
	FAM160A1		ZNF850		YTHDF3
	FAM168A		ZSCAN22		YWHAQ
	FAM168B		ZSCAN32		YY1AP1
	FAM172A				ZDHHC6
	FAM192A				ZFAND5
	FAM219A				ZHX3
	FAM83D				ZNF106
	FARP1				ZNF131
	FBLN7				ZNF17
	FBXL14				ZNF202
	FBXL4				ZNF211
	FBXO11				ZNF256
	FBXO15				ZNF330
	FBXO4				ZNF385D
	FCHO1				ZNF418
	FEM1C				ZNF597
	FGD3				ZNF599
	FGD5				ZNF706
	FGF13				ZNF805
	FICD				ZZZ3
	FLII
	FLNB
	FLT1
	FLT4
	FMN1
	FMN2
	FMO5
	FNDC10
	FOXI3
	FOXK2
	FOXP1
	FOXP4
	FRMD6
	FRS3
	FTSJ1
	FUNDC2
	FXYD4
	FXYD6
	GAB1
	GAB2
	GAB4
	GABRG3
	GALE
	GALNT2
	GAR1
	GARNL3
	GARS
	GAS7
	GASK1A
	GATA6
	GATAD2A
	GBX1
	GCH1
	GCM1
	GCN1
	GDPD4
	GEMIN4
	GFRA1
	GFY
	GGA1
	GGA3
	GID4
	GID8
	GINS1
	GINS3
	GKAP1
	GLRX
	GLYATL3
	GLYR1
	GM2A
	GMDS
	GNB1L
	GNG12
	GNG7
	GOLGA1
	GOLGA2
	GOLGA3
	GON7
	GORAB
	GOSR2
	GOT2
	GP9
	GPAT2
	GPATCH11
	GPATCH2L
	GPC3
	GPC4
	GPR107
	GPR153
	GPR161
	GRAMD1B
	GRB7
	GREB1L
	GREM1
	GRHL2
	GRHL3
	GRIK2
	GRIN2B
	GRM5
	GRM7
	GRM8
	GSE1
	GSK3A
	GSN
	GTF2B
	GTF2F2
	GTF2H4
	GTF3C3
	GTF3C4
	GUCD1
	H2AFX
	HAUS1
	HAVCR1
	HBQ1
	HCFC1
	HCRTR2
	HDAC8
	HDGFL3
	HERC1
	HERPUD2
	HIF1AN
	HINFP
	HIP1R
	HIST1H2AC
	HIST1H2BK
	HIST2H2AC
	HLCS
	HMGCS1
	HMGN3
	HMGXB3
	HMGXB4
	HNRNPA2B1
	HNRNPH2
	HNRNPM
	HNRNPUL1
	HNRNPUL2
	HPS4
	HS1BP3
	HSDL2
	HTT
	HUS1
	IDS
	IER3IP1
	IFI35
	IFNL1
	IFT172
	IFT43
	IGBP1
	IGF2R
	IK
	IKBKG
	IL10
	IL1R2
	IL1RAPL1
	ILRUN
	INCENP
	ING3
	INPP5A
	INPP5B
	INPP5J
	INPP5K
	INTS12
	INTS3
	INTS5
	INTS9
	IP6K1
	IPO7
	IRF6
	ITGA4
	ITGAL
	ITGB3BP
	ITIH5
	ITPR1
	IZUMO1R
	JMJD7
	JPT2
	JUP
	KANK1
	KANSL1
	KANSL3
	KATNAL1
	KCNAB2
	KCNC4
	KCNIP4
	KCNJ6
	KCNK9
	KCNQ1
	KCTD21
	KCTD7
	KDELR2
	KDF1
	KDM4A
	KDM4B
	KDM5C
	KEG06_p04
	KEG06_p06
	KEG06_p08
	KEG06_p10
	KEG06_p11
	KEG06_p12
	KEG06_p13
	KEG06_t01
	KEG06_t05
	KEG06_t06
	KEG06_t07
	KEG06_t11
	KEG06_t19
	KHDRBS1
	KHSRP
	KIAA0100
	KIAA0355
	KIAA0513
	KIAA0895L
	KIAA1191
	KIAA1755
	KIAA2013
	KIF21B
	KIF2C
	KIFC1
	KIFC3
	KLC2
	KLF11
	KLF12
	KLF16
	KLHDC3
	KLHL18
	KLHL26
	KLK15
	KLK6
	KPNA6
	LACTB2
	LAMA2
	LAMB1
	LAMC1
	LAPTM4A
	LARS2
	LCP1
	LDOC1
	LENG8
	LEO1
	LHFPL3
	LIMK1
	LIMS2
	LIN28B
	LMBR1L
	LOC100424304
	LOC100424371
	LOC100425035
	LOC100425173
	LOC100426608
	LOC100427312
	LOC100427362
	LOC100427976
	LOC100428129
	LOC100429133
	LOC100429312
	LOC100429350
	LOC100429752
	LOC100429933
	LOC100430143
	LOC100430266
	LOC100430358
	LOC100430389
	LOC100430473
	LOC100430953
	LOC106992283
	LOC106992346
	LOC106992427
	LOC106992625
	LOC106992887
	LOC106992896
	LOC106993021
	LOC106993234
	LOC106993503
	LOC106993544
	LOC106993749
	LOC106993809
	LOC106993906
	LOC106993916
	LOC106994123
	LOC106994171
	LOC106994204
	LOC106994257
	LOC106994292
	LOC106994331
	LOC106994341
	LOC106994471
	LOC106994581
	LOC106994717
	LOC106994850
	LOC106994856
	LOC106994870
	LOC106994924
	LOC106994980
	LOC106995077
	LOC106995105
	LOC106995210
	LOC106995287
	LOC106995403
	LOC106995524
	LOC106996314
	LOC106996474
	LOC106996507
	LOC106996859
	LOC106997094
	LOC106997221
	LOC106997333
	LOC106997517
	LOC106997596
	LOC106997731
	LOC106997738
	LOC106997895
	LOC106998127
	LOC106998199
	LOC106998274
	LOC106998452
	LOC106998584
	LOC106998609
	LOC106998659
	LOC106998668
	LOC106998777
	LOC106999057
	LOC106999090
	LOC106999101
	LOC106999143
	LOC106999161
	LOC106999250
	LOC106999480
	LOC106999570
	LOC106999687
	LOC106999725
	LOC106999934
	LOC106999945
	LOC107000344
	LOC107000611
	LOC107000770
	LOC107000783
	LOC107000809
	LOC107000817
	LOC107000903
	LOC107000998
	LOC114669717
	LOC114669724
	LOC114669750
	LOC114670040
	LOC114670060
	LOC114670145
	LOC114670450
	LOC114670521
	LOC114670545
	LOC114670787
	LOC114670983
	LOC114671043
	LOC114671418
	LOC114671467
	LOC114671517
	LOC114671522
	LOC114671705
	LOC114671777
	LOC114671897
	LOC114671899
	LOC114671929
	LOC114671957
	LOC114672050
	LOC114672254
	LOC114672324
	LOC114672410
	LOC114672747
	LOC114672760
	LOC114672798
	LOC114672837
	LOC114672856
	LOC114672998
	LOC114673128
	LOC114673210
	LOC114673461
	LOC114673468
	LOC114673571
	LOC114673703
	LOC114673714
	LOC114673731
	LOC114673795
	LOC114674074
	LOC114674169
	LOC114674216
	LOC114674534
	LOC114674731
	LOC114675128
	LOC114675364
	LOC114675372
	LOC114675383
	LOC114675413
	LOC114675480
	LOC114675500
	LOC114675520
	LOC114675526
	LOC114675553
	LOC114675556
	LOC114675670
	LOC114675676
	LOC114675872
	LOC114675904
	LOC114675993
	LOC114676025
	LOC114676029
	LOC114676045
	LOC114676058
	LOC114676060
	LOC114676215
	LOC114676242
	LOC114676751
	LOC114676848
	LOC114676995
	LOC114677055
	LOC114677139
	LOC114677307
	LOC114677357
	LOC114677401
	LOC114677510
	LOC114677626
	LOC114678137
	LOC114678207
	LOC114678366
	LOC114678427
	LOC114678435
	LOC114678718
	LOC114678871
	LOC114678993
	LOC114679003
	LOC114679254
	LOC114679305
	LOC114679320
	LOC114679327
	LOC114679606
	LOC114679691
	LOC114679922
	LOC114679934
	LOC114680002
	LOC114680165
	LOC114680194
	LOC114680209
	LOC114680328
	LOC114680514
	LOC693399
	LOC693477
	LOC693664
	LOC694228
	LOC694543
	LOC694565
	LOC694684
	LOC695495
	LOC695670
	LOC695844
	LOC696103
	LOC696312
	LOC696565
	LOC696808
	LOC696885
	LOC697437
	LOC697476
	LOC697943
	LOC698143
	LOC698152
	LOC698582
	LOC698665
	LOC698693
	LOC699178
	LOC699317
	LOC699443
	LOC701250
	LOC701315
	LOC701681
	LOC701691
	LOC701808
	LOC701920
	LOC702859
	LOC703017
	LOC703832
	LOC704463
	LOC705156
	LOC705618
	LOC705652
	LOC705933
	LOC707085
	LOC707869
	LOC708686
	LOC708891
	LOC708899
	LOC708964
	LOC709619
	LOC709820
	LOC710110
	LOC711295
	LOC711890
	LOC712203
	LOC712608
	LOC712661
	LOC713300
	LOC713776
	LOC715442
	LOC715954
	LOC716016
	LOC716221
	LOC716527
	LOC716879
	LOC716882
	LOC717340
	LOC717434
	LOC717488
	LOC718408
	LOC718775
	LOC719232
	LOC719386
	LOC719632
	LOC720024
	LOC720035
	LOC720251
	LOC720980
	LOC721289
	LOC722582
	LONP2
	LOXL1
	LPCAT1
	LPIN1
	LPIN2
	LRCH1
	LRIG2
	LRMDA
	LRRC46
	LRRC7
	LSM14B
	LSS
	LTBP4
	LTV1
	LY86
	LYRM1
	LZTFL1
	MACC1
	MAFG
	MAGI2
	MAGOH
	MAGT1
	MAML2
	MAP1LC3C
	MAP2K7
	MAP3K3
	MAP3K7CL
	MAP4
	MAP4K3
	MAP4K4
	MAP6
	MAP7
	MAPK10
	MAPK14
	MAPK4
	MAPKBP1
	2025-03-08
	MARK3
	MARK4
	MAST4
	MAT2A
	MBIP
	MBP
	MCM2
	MCTP2
	MCU
	MCUB
	MDC1
	MDM1
	MDN1
	MECP2
	MED1
	MED12L
	MED15
	MED6
	MEFV
	MEIS2
	METAP1D
	METTL6
	MFAP4
	MFHAS1
	MFSD13A
	MFSD2A
	MFSD4A
	MGAT4A
	MGME1
	MGRN1
	MICAL3
	MIDN
	MIGA1
	MINAR1
	MINDY4
	MITD1
	MKLN1
	MKNK2
	MKS1
	MLLT3
	MMS19
	MOB3B
	MON1B
	MORC2
	MPIG6B
	MPP2
	MRC2
	MRO
	MRPL42
	MRPS35
	MRTFA
	MRVI1
	MSANTD3
	MSL1
	MT1E
	MT1M
	MTDH
	MTFR1
	MTHFD1
	MTHFD2
	MTHFSD
	MTMR10
	MTMR12
	MTMR3
	MTO1
	MTOR
	MTPN
	MTRR
	MUC15
	MYBBP1A
	MYD88
	MYH11
	MYO19
	MYO1E
	MYO5B
	MYOCD
	MYOF
	MYRIP
	NAA20
	NAA60
	NAA80
	NABP2
	NADK
	NANP
	NAP1L4
	NAT10
	NAV2
	NAV3
	NBEAL1
	NBN
	NCAN
	NDC1
	NDE1
	NDOR1
	NDUFAF4
	NEBL
	NEFH
	NET1
	NETO1
	NFATC2
	NFE2L1
	NFX1
	NICN1
	NIF3L1
	NISCH
	NKD1
	NLRP13
	NLRP9
	NMRAL1
	NMRK2
	NOC2L
	NOL4
	NOL4L
	NOL6
	NOP14
	NOP58
	NOP9
	NOTCH4
	NPAS2
	NPC1
	NPDC1
	NPEPPS
	NPRL3
	NR2C2AP
	NR3C2
	NR6A1
	NRDE2
	NRG4
	NSL1
	NSUN2
	NSUN4
	NT5C2
	NUCB2
	NUDT16
	NUDT21
	NUFIP1
	NUP155
	NUP188
	NUP43
	NXF1
	NYAP2
	OARD1
	ODF2
	OGDH
	OGT
	OR2A25
	OR2D3
	ORC2
	OSBP
	OSBPL10
	OSBPL2
	OSBPL5
	OSER1
	OSGEPL1
	OTUB1
	OTUD5
	OTUD7B
	OTULIN
	OXA1L
	PACSIN2
	PAF1
	PAFAH1B1
	PAK1
	PALLD
	PAPLN
	PARP1
	PARPBP
	PCBP2
	PCBP3
	PCGF3
	PCIF1
	PCMTD1
	PCNT
	PCNX3
	PCYOX1L
	PDCD6
	PDCD6IP
	PDE4A
	PDE8B
	PDP1
	PDP2
	PDPK1
	PDPR
	PDSS2
	PDZD2
	PECAM1
	PELP1
	PFDN1
	PFN2
	PGBD5
	PGRMC2
	PHACTR4
	PHC1
	PHF12
	PHF13
	PHKA2
	PHLDB1
	PHOSPHO2
	PHRF1
	PI4KB
	PIAS4
	PICK1
	PIGC
	PIGF
	PIGH
	PIGS
	PIK3C3
	PITPNA
	PITRM1
	PIWIL2
	PKN2
	PLAAT3
	PLAGL2
	PLAUR
	PLCG1
	PLEKHA7
	PLEKHB1
	PLEKHG1
	PLEKHG3
	PLEKHG5
	PLEKHG6
	PLEKHM1
	PLEKHM2
	PLPPR2
	PLS1
	PMM1
	PNMA8A
	PNPO
	PNPT1
	POLA2
	POLE3
	POLG2
	POLH
	POLR1A
	POLR1B
	POLR3F
	POR
	PPARD
	PPFIBP2
	PPM1H
	PPME1
	PPP1R10
	PPP1R12B
	PPP1R13B
	PPP1R8
	PPP2R1A
	PPP2R2C
	PPP3CC
	PPP3R1
	PPRC1
	PPTC7
	PQBP1
	PRDM10
	PRDM6
	PRDX1
	PREB
	PRKAA1
	PRKAR2A
	PRKCQ
	PRLHR
	PRMT2
	PRPF19
	PRPF3
	PRPF38A
	PRPF8
	PRPS1
	PRR14
	PRR36
	PRRC2A
	PRRC2B
	PRUNE1
	PSEN1
	PSEN2
	PSMD14
	PSMD7
	PTEN
	PTPN1
	PTPN11
	PTPN23
	PTPN3
	PTPN9
	PTPRG
	PTPRH
	PUDP
	PUM3
	PUS7L
	PWP1
	PYGO2
	QSOX1
	RAB14
	RAB1B
	RAB2A
	RAB30
	RAB3A
	RAB7A
	RAB8A
	RABIF
	RAC2
	RAD23B
	RAD54L2
	RAE1
	RALGAPB
	RALGPS1
	RALGPS2
	RANBP3
	RAP2B
	RAPH1
	RARA
	RASGRP1
	RAVER1
	RBM15B
	RBM23
	RBM38
	RBM39
	RBM6
	RBMX
	RBP7
	RCC1
	RDH10
	RECQL5
	RELA
	RELL1
	RERE
	RESP18
	RETREG2
	REXO1
	RFFL
	RFX5
	RGP1
	RHBDD1
	RHBDF2
	RHEB
	RIC8A
	RIDA
	RIN3
	RIOX2
	RIPOR2
	RND1
	RNF122
	RNF126
	RNF14
	RNF141
	RNF145
	RNF169
	RNF182
	RNF187
	RNF19B
	RNF31
	RNF4
	RNF40
	RNF41
	RPAP1
	RPH3A
	RPL7
	RPN1
	RPS13
	RPS6KA2
	RPS9
	RPSA
	RPUSD3
	RRAGA
	RRAS2
	RREB1
	RRM2
	RRN3
	RRP15
	RSPH9
	RSRC2
	RSRP1
	RSU1
	RTTN
	RUSC2
	RUVBL1
	RYR3
	S100PBP
	SAE1
	SALL2
	SAMD12
	SAMD4A
	SAMD4B
	SBF1
	SCAI
	SCAMP4
	SCFD2
	SCIMP
	SDR42E1
	SEC11A
	SEC16A
	SEC22C
	SEC24A
	SEC24C
	SEC61A1
	SEH1L
	SELENON
	SELENOW
	SEMA3D
	SEMA4B
	SEMA5A
	SENP1
	SENP2
	SENP5
	SENP8
	SEPTIN7
	SEPTIN9
	SERTAD2
	SETD1B
	SETD4
	SETDB1
	SF3A1
	SFT2D2
	SFXN5
	SH3GL1
	SH3GLB1
	SHD
	SHISA9
	SHMT1
	SHMT2
	SIAH1
	SIAH3
	SIN3B
	SIPA1L1
	SKI
	SLC12A2
	SLC12A6
	SLC12A8
	SLC13A3
	SLC13A5
	SLC16A14
	SLC1A2
	SLC20A1
	SLC25A16
	SLC25A21
	SLC25A22
	SLC25A32
	SLC25A36
	SLC25A38
	SLC25A44
	SLC25A46
	SLC27A1
	SLC28A3
	SLC31A2
	SLC35A4
	SLC35F6
	SLC38A11
	SLC38A6
	SLC39A9
	SLC41A1
	SLC41A3
	SLC52A2
	SLC5A6
	SLC7A11
	SLC7A5
	SLC7A8
	SLC9A1
	SLC9A7
	SLC9A8
	SLC9A9
	SLCO3A1
	SLIT3
	SLU7
	SLX4
	SMAD1
	SMAP1
	SMARCA4
	SMC1A
	SMG6
	SMG8
	SMNDC1
	SMOC1
	SMPD3
	SMPD4
	SMYD4
	SMYD5
	SNAP91
	SNAPC4
	SNAPIN
	SNIP1
	SNPH
	SNRNP200
	SNRNP70
	SNW1
	SNX12
	SNX29
	SOCS6
	SORCS3
	SORT1
	SP2
	SP3
	SPATA7
	SPHK2
	SPHKAP
	SPINDOC
	SPIRE1
	SPRY4
	SPTAN1
	SPTB
	SRCAP
	SREBF2
	SRFBP1
	SRGAP2
	SRI
	SRPRA
	SRRM1
	SRSF1
	SRSF6
	ST5
	STARD13
	STK11
	STK38L
	STK39
	STMND1
	STPG2
	STRIP1
	STT3A
	STX3
	STX6
	STX7
	STXBP1
	SUGP2
	SULT2A1
	SUPT16H
	SUPT3H
	SUPT6H
	SURF4
	SUSD6
	SUV39H2
	SVEP1
	SVOP
	SVOPL
	SWSAP1
	SYAP1
	SYN2
	SYNE1
	SYNJ2
	SYNM
	SYNPO
	SYNRG
	SYTL4
	SYVN1
	SZRD1
	TACC3
	TAF15
	TAF1C
	TAF4
	TAF8
	TAFA5
	TANC1
	TAOK2
	TAPT1
	TARDBP
	TARS2
	TASP1
	TATDN1
	TBC1D1
	TBC1D22B
	TBC1D2B
	TBC1D8
	TBPL2
	TCEA3
	TCEAL1
	TCEANC2
	TCF20
	TCHP
	TCTA
	TCTN2
	TCTN3
	TEAD4
	TET3
	TEX2
	TEX26
	TFAP2C
	TFB2M
	TFCP2
	TFE3
	TGIF2
	TGIF2LX
	THADA
	THAP1
	THBS4
	THSD7A
	TIAM2
	TICAM1
	TIMD4
	TIMP2
	TIPIN
	TJAP1
	TLK1
	TM2D2
	TM6SF1
	TMC5
	TMED9
	TMEFF1
	TMEM104
	TMEM108
	TMEM115
	TMEM132D
	TMEM140
	TMEM159
	TMEM169
	TMEM183A
	TMEM184B
	TMEM192
	TMEM198
	TMEM201
	TMEM223
	TMEM241
	TMEM252
	TMEM33
	TMEM59
	TMEM68
	TMEM69
	TMOD3
	TMX4
	TNFRSF19
	TNFRSF1B
	TNS1
	TOB1
	TOM1
	TOM1L2
	TOMM34
	TOMM5
	TOX4
	TP53I11
	TP63
	TPK1
	TRA2B
	TRAF3
	TRAF3IP2
	TRAF5
	TRAM2
	TRAPPC11
	TRAPPC9
	TRERF1
	TRIM11
	TRIM14
	TRIM23
	TRIM37
	TRIM38
	TRIM6
	TRIM71
	TRIO
	TRMT1L
	TRMT2B
	TRMT44
	TRPC4AP
	TRPM3
	TRUB1
	TRUB2
	TSFM
	TSG101
	TSPAN18
	TSTD3
	TTC12
	TTC23
	TTC5
	TTI2
	TTLL4
	TTLL9
	TTYH2
	TUBD1
	TVP23A
	TWISTNB
	TYRO3
	U2AF2
	UACA
	UBALD1
	UBASH3A
	UBE2I
	UBE2O
	UBE2Z
	UBE3A
	UBE3B
	UBIAD1
	UBL3
	UBL7
	UBLCP1
	UBN1
	UBOX5
	UMAD1
	UNC13C
	UNC5A
	UNC5D
	UNC93A
	UNKL
	UPF2
	USF1
	USF2
	USP14
	USP15
	USP19
	USP35
	USP5
	VAMP3
	VAMP7
	VARS2
	VAT1
	VCL
	VCPIP1
	VEZF1
	VIPAS39
	VPS11
	VPS16
	VPS18
	VPS26C
	VPS35L
	VRK1
	VSTM2L
	VTI1A
	WAC
	WARS2
	WASF3
	WASHC1
	WASL
	WBP2
	WDFY1
	WDFY2
	WDR12
	WDR45B
	WDR60
	WDR62
	WDR7
	WDR70
	WDR89
	WDR91
	WIZ
	WLS
	WRAP53
	WRB
	XPO5
	XPO6
	XPR1
	XRCC5
	XRRA1
	XYLT1
	YAE1
	YAP1
	YBX2
	YKT6
	YLPM1
	YPEL1
	YPEL2
	YWHAZ
	YY1
	YY2
	ZBTB26
	ZBTB39
	ZBTB5
	ZC3H15
	ZC3H18
	ZCCHC12
	ZCWPW1
	ZDHHC3
	ZDHHC5
	ZDHHC8
	ZFAND3
	ZFP1
	ZFP37
	ZFP62
	ZFP64
	ZFPM2
	ZHX2
	ZKSCAN2
	ZMIZ2
	ZNF140
	ZNF142
	ZNF16
	ZNF160
	ZNF212
	ZNF214
	ZNF234
	ZNF235
	ZNF236
	ZNF275
	ZNF3
	ZNF304
	ZNF318
	ZNF326
	ZNF329
	ZNF335
	ZNF346
	ZNF384
	ZNF398
	ZNF407
	ZNF449
	ZNF507
	ZNF510
	ZNF530
	ZNF540
	ZNF557
	ZNF564
	ZNF592
	ZNF607
	ZNF658
	ZNF664
	ZNF668
	ZNF669
	ZNF682
	ZNF710
	ZNF829
	ZNF831
	ZNFX1
	ZNHIT3
	ZNRF1
	ZPBP2
	ZRSR2
	ZSCAN25
	ZSCAN26
	ZSCAN30
	ZSWIM4
	ZW10

## Sheet: GO enrichment of module 1
GO enrichment of module 1 genes
Category	Term	Count	%	Pvalue	Genes
GOTERM_BP_DIRECT	GO:0000398~mRNA splicing, via spliceosome	10	4.09836	4.59025e-05	SF3B5, GPKOW, MFAP1, LOC713490, CWF19L2, RBM41, PPIE, CWC25, SNRPC, LSM2
GOTERM_BP_DIRECT	GO:0006511~ubiquitin-dependent protein catabolic process	9	3.68852	0.00130483	MRPL2, PPP1R11, UBE2D4, ARRDC1, UBE2D2, SIAH2, RNF8, PSMF1, NTAN1
GOTERM_BP_DIRECT	GO:0043161~proteasome-mediated ubiquitin-dependent protein catabolic process	9	3.68852	0.00587594	SHARPIN, MAEA, UBXN11, PSMB3, UBE2D2, SIAH2, PSMF1, FBXO7, SIRT2
GOTERM_BP_DIRECT	GO:0000281~mitotic cytokinesis	4	1.63934	0.00996918	MRPL2, PLK1, JTB, MAP9
GOTERM_BP_DIRECT	GO:0006457~protein folding	6	2.45902	0.0104111	CCT6A, MKKS, TTC4, PPIF, PPIE, MESD
GOTERM_BP_DIRECT	GO:0090201~negative regulation of release of cytochrome c from mitochondria	3	1.22951	0.0112569	LMNA, PPIF, GHITM
GOTERM_BP_DIRECT	GO:0015031~protein transport	9	3.68852	0.0159313	SEC13, ACOT8, ARRDC1, IST1, CHMP3, SNX21, SNF8, SNX8, VPS25
GOTERM_BP_DIRECT	GO:0071985~multivesicular body sorting pathway	3	1.22951	0.0178184	CHMP3, SNF8, VPS25
GOTERM_BP_DIRECT	GO:0006325~chromatin organization	6	2.45902	0.0223413	BABAM1, GPX4, RNF8, MSL3, DEK, JMJD6
GOTERM_BP_DIRECT	GO:0048870~cell motility	3	1.22951	0.0394191	STRBP, BRK1, GAS8

## Sheet: GO enrichment of module 2
GO enrichment of module 2 genes
Category	Term	Count	%	Pvalue	Genes
GOTERM_BP_DIRECT	GO:0006886~intracellular protein transport	40	2.28833	8.81501e-06	ARF3, LOC114669717, RAB3A, RAB1B, STXBP1, VPS26C, IPO7, AP2A2, RPH3A, GGA1, GGA3, SCFD2, PPP1R8, VTI1A, STX6, VPS11, TLK1, AP3S2, ARFIP1, STX3, VPS16, TRIM23, WLS, VPS18, TMED9, SEC24A, SNAPIN, STX7, AP3B1, AP2B1, MYRIP, SYTL4, CTTN, SRPRA, PICK1, VIPAS39, COPG2, SEC24C, SLU7, PAFAH1B1
GOTERM_BP_DIRECT	GO:0045944~positive regulation of transcription by RNA polymerase II	88	5.03432	1.8191e-05	SETD4, CALCOCO1, CRTC3, CRTC1, UBE3A, WASL, MECP2, ZNF407, ZMIZ2, KPNA6, IKBKG, CCN1, PELP1, IL10, BCAS3, MED1, KLF12, MYOCD, PARP1, ATMIN, TFE3, MRTFA, AP3B1, PPRC1, GTF2F2, RNF40, MED6, SREBF2, SENP1, HCFC1, GREM1, TET3, RARA, ZFPM2, PIGF, PPARD, YAP1, NUFIP1, WBP2, DOT1L, GATA6, RNF4, PRDM10, RELA, MED12L, SLC9A1, PPP3R1, LOC106992427, ZNF507, DVL2, DVL3, APBB2, CAMTA2, ZNF304, AKIRIN1, TFAP2C…
GOTERM_BP_DIRECT	GO:0016192~vesicle-mediated transport	34	1.94508	3.39816e-05	ARF3, GOSR2, STXBP1, SLC41A1, GGA1, GGA3, SCFD2, PPP1R8, PACSIN2, VTI1A, VPS11, TRAPPC11, STX3, BORCS7, TRIM23, NDC1, RAB2A, SEC16A, STX7, HPS4, CCZ1, AP3B1, TVP23A, AP2B1, RAB30, RAB14, LOC106995287, SPIRE1, KDELR2, RIN3, COPG2, SFT2D2, VAMP3, MON1B
GOTERM_BP_DIRECT	GO:0006509~membrane protein ectodomain proteolysis	9	0.514874	8.92004e-05	ADAM19, APH1A, BACE2, PSEN2, DAG1, PRKCQ, PSEN1, LRIG2, RBMX
GOTERM_BP_DIRECT	GO:0032456~endocytic recycling	14	0.800915	0.000124228	DENND1A, VPS26C, SNX12, PTPN23, EHD2, EHD3, RAB14, VTI1A, STX6, EPG5, WASHC1, CCDC93, RAB8A, VPS35L
GOTERM_BP_DIRECT	GO:0070050~neuron cellular homeostasis	9	0.514874	0.000130883	PRKAA1, SNAPIN, DCTN1, CHMP2B, TYRO3, ATP2A2, PSEN1, DISC1, BAP1
GOTERM_BP_DIRECT	GO:0030036~actin cytoskeleton organization	26	1.48741	0.000388672	KANK1, FMN1, FMN2, WASL, CLN3, PAK1, PACSIN2, ABL1, FLNB, THSD7A, SPTAN1, WASF3, PHACTR4, PTPN1, STARD13, LIMK1, SPTB, BCR, NISCH, MKLN1, DIAPH1, PALLD, DAAM2, TAOK2, PAFAH1B1, PFN2
GOTERM_BP_DIRECT	GO:0008333~endosome to lysosome transport	11	0.629291	0.000776776	VPS18, SNAPIN, TSG101, VAMP7, MGRN1, BIN1, SORT1, EPG5, VIPAS39, VPS16, RAB7A
GOTERM_BP_DIRECT	GO:0046856~phosphatidylinositol dephosphorylation	9	0.514874	0.000844398	INPP5B, MTMR10, MTMR3, INPP5A, MTMR12, PTEN, INPP5J, INPP5K, SYNJ2
GOTERM_BP_DIRECT	GO:2000096~positive regulation of Wnt signaling pathway, planar cell polarity pathway	5	0.286041	0.00095734	ABL1, GPC3, MLLT3, NKD1, ANKRD6
GOTERM_BP_DIRECT	GO:0008380~RNA splicing	19	1.08696	0.00136795	RBM38, TAF15, DDX46, SRSF1, DDX23, CCAR2, SRRM1, PQBP1, LOC106992427, U2AF2, MAGOH, ACIN1, DHX38, ZNF326, TARDBP, SMNDC1, RBMX, SLU7, SUGP2
GOTERM_BP_DIRECT	GO:0010508~positive regulation of autophagy	14	0.800915	0.00138853	PRKAA1, NPRL3, MEFV, TICAM1, MTDH, DUSP12, TMEM59, TRIM6, STK11, TRIM38, LOC703832, ATF6, TRIM23, CDK16
GOTERM_BP_DIRECT	GO:0015031~protein transport	38	2.17391	0.00183089	ARF3, LOC114669717, TSG101, SEH1L, NUP188, GOSR2, RAB1B, STXBP1, SNX12, PSEN1, IER3IP1, SEC61A1, SCAMP4, SCFD2, PACSIN2, DAG1, TOM1, YKT6, RAB8A, NDC1, RAB2A, SEC16A, RHBDF2, SURF4, TOM1L2, RABIF, VAMP7, DOP1B, CHMP2B, SPIRE1, KDELR2, PREB, SFT2D2, TOMM5, VAMP3, RAB7A, SEC22C, VPS35L
GOTERM_BP_DIRECT	GO:0010507~negative regulation of autophagy	10	0.572082	0.00214004	IL10, KDM4A, DAP, RRAGA, HERC1, FOXK2, STK38L, ADRA1A, MTOR, EIF4G1
GOTERM_BP_DIRECT	GO:0071108~protein K48-linked deubiquitination	8	0.457666	0.00259344	VCPIP1, USP14, OTUD5, MINDY4, USP5, OTUD7B, BAP1, OTUB1
GOTERM_BP_DIRECT	GO:0000398~mRNA splicing, via spliceosome	23	1.31579	0.00273596	ZRSR2, IK, PRPF38A, DHX8, DDX46, DDX23, PRPF19, CRNKL1, PRPF8, CDC40, SNW1, LOC107000998, LOC106992427, SNRNP70, TRA2B, PRPF3, CWF19L1, HNRNPA2B1, C15H9ORF78, SNIP1, DHX38, SLU7, RBM6
GOTERM_BP_DIRECT	GO:0006397~mRNA processing	23	1.31579	0.00348595	RBM38, KHDRBS1, RBM39, DDX46, NSUN2, DDX1, SRSF1, PCIF1, DDX23, SRRM1, PQBP1, HNRNPM, NUDT21, LOC106992427, U2AF2, DHX38, ZNF326, RBM23, TARDBP, SNRNP200, SMNDC1, RBMX, SUGP2
GOTERM_BP_DIRECT	GO:0051865~protein autoubiquitination	12	0.686499	0.00380625	TRIM71, NFX1, CUL3, RNF19B, LOC705933, TRIM37, UBE3A, RNF141, TRIM11, RNF122, RNF187, RNF41
GOTERM_BP_DIRECT	GO:0046330~positive regulation of JNK cascade	15	0.858124	0.00565604	MAPKBP1, FLT4, TNFRSF19, DAB2IP, AXIN1, RNF41, MFHAS1, TRAF3, TAOK2, TRAF5, MBIP, DVL2, DVL3, MYD88, ANKRD6
GOTERM_BP_DIRECT	GO:0006470~protein dephosphorylation	18	1.02975	0.00594857	PTPN1, DUSP3, PTEN, PPM1H, PTPN11, PTPN23, PTPRH, DUSP16, CDC25A, PTPRG, PDP1, DUSP12, PDP2, DUSP10, UBLCP1, PPP2R1A, PTPN9, PTPN3
GOTERM_BP_DIRECT	GO:0032418~lysosome localization	8	0.457666	0.00614982	SNAPIN, RAB3A, KLC2, PLEKHM1, MAP6, PLEKHM2, SYTL4, BORCS7
GOTERM_BP_DIRECT	GO:0016236~macroautophagy	9	0.514874	0.00675226	ILRUN, RAB2A, TSG101, NPC1, MAP1LC3C, EI24, VTI1A, MTOR, ATG5
GOTERM_BP_DIRECT	GO:1900181~negative regulation of protein localization to nucleus	6	0.343249	0.00713064	ILRUN, MFHAS1, FBXO4, OTUD7B, MARK3, MTOR
GOTERM_BP_DIRECT	GO:0032259~methylation	24	1.373	0.00785485	SETD4, TSFM, SUV39H2, KDM4A, KDM5C, KDM4B, SETDB1, PRMT2, SHMT2, SMYD5, SHMT1, SETD1B, DNMT3A, DOT1L, ATPSCKMT, EHMT1, TRMT2B, PRDM10, CARM1, METTL6, SMYD4, TRMT44, TRMT1L, PCMTD1
GOTERM_BP_DIRECT	GO:0048172~regulation of short-term neuronal synaptic plasticity	5	0.286041	0.00995279	CLN3, RAB3A, SYAP1, GRIK2, SHISA9
GOTERM_BP_DIRECT	GO:0010633~negative regulation of epithelial cell migration	5	0.286041	0.00995279	DUSP10, DAB2IP, PTPN23, CORO1C, PTPRG
GOTERM_BP_DIRECT	GO:0006974~DNA damage response	22	1.25858	0.0103141	YAP1, CTC1, MDC1, TIPIN, SPINDOC, DDX11, CBX1, NFATC2, VRK1, FMN2, PSEN1, NPAS2, FOXP1, PAK1, STK11, TTC5, OARD1, CDK3, POLE3, SUSD6, IKBKG, MORC2
GOTERM_BP_DIRECT	GO:0000122~negative regulation of transcription by RNA polymerase II	74	4.23341	0.0107043	SUV39H2, PRDM6, ZBTB26, EHMT1, OTUD7B, NOC2L, MECP2, SALL2, SIN3B, LOC693477, LOC720035, ZFP37, TP63, PIAS4, ZBTB39, MED1, KLF11, ZHX2, MYOCD, TGIF2, ZFP1, PARP1, DNMT3A, YWHAZ, LOC699178, ETV5, ZNF16, NIF3L1, NFX1, BIN1, TGIF2LX, RFX5, RARA, ZNF557, BCORL1, ZFPM2, ZNF510, ZNF234, PPARD, YAP1, KHDRBS1, TSG101, NOTCH4, CUL3, GATA6, LOC114674074, ZNF3, PSEN1, MTDH, PCBP3, DNAJB5, ATXN1L, MBIP, ZNF6…
GOTERM_BP_DIRECT	GO:0032968~positive regulation of transcription elongation by RNA polymerase II	7	0.400458	0.0116073	SUPT16H, BTBD18, LEO1, LOC114675526, CDK13, EAPP, SUPT6H
GOTERM_BP_DIRECT	GO:0046907~intracellular transport	6	0.343249	0.0118044	ENAH, BLOC1S6, RANBP3, SEC16A, SPIRE1, FMN2
GOTERM_BP_DIRECT	GO:0003016~respiratory system process	6	0.343249	0.0118044	BLOC1S6, RAB3A, FLT4, AP3B1, YWHAZ, ADH5
GOTERM_BP_DIRECT	GO:0006904~vesicle docking involved in exocytosis	6	0.343249	0.0118044	VPS18, RAB3A, STXBP1, VPS11, YKT6, RAB8A
GOTERM_BP_DIRECT	GO:0007030~Golgi organization	18	1.02975	0.0133924	RAB2A, TMED9, SEC16A, SURF4, HTT, TJAP1, SYNE1, GOLGA2, RAB30, LOC100430266, ZW10, LOC100430473, DYM, PLEKHM2, TRAPPC11, CORO7, KIFC3, RAB8A
GOTERM_BP_DIRECT	GO:0016485~protein processing	12	0.686499	0.0142572	ADAM19, APH1A, BACE2, CLN3, PITRM1, IL1R2, IFT172, PSEN2, LONP2, CASP2, PSEN1, OGT
GOTERM_BP_DIRECT	GO:0000380~alternative mRNA splicing, via spliceosome	6	0.343249	0.0147761	HNRNPM, SRSF1, CDK13, SRSF6, SLU7, PQBP1
GOTERM_BP_DIRECT	GO:0016477~cell migration	27	1.54462	0.0152688	FLT1, CUL3, LAMC1, FMN2, RND1, CDH5, PAK1, GPC3, GPC4, PLCG1, ZNF346, JUP, PDPK1, NDE1, NFATC2, LAMB1, CDC42BPB, CTTN, PALLD, TYRO3, CORO7, LCP1, CEP85, AVL9, DOCK1, BCAR1, CDH19
GOTERM_BP_DIRECT	GO:0042147~retrograde transport, endosome to Golgi	12	0.686499	0.0157918	RGP1, GGA1, RNF126, DCTN1, DENND2A, VTI1A, STX6, UBE2O, WASHC1, YKT6, RAB7A, VAMP3
GOTERM_BP_DIRECT	GO:0015746~citrate transport	3	0.171625	0.0163776	SLC13A3, SLC13A5, SFXN5
GOTERM_BP_DIRECT	GO:0006897~endocytosis	20	1.14416	0.0165986	LMBR1L, SORT1, DENND1A, HIP1R, TBC1D2B, EPS15L1, CSNK1E, EPN2, MRC2, CDC42, EHD2, MYO1E, EHD3, NPC1, FCHO1, PACSIN2, PIK3C3, PIGF, SH3GL1, CSNK1G1
GOTERM_BP_DIRECT	GO:0001522~pseudouridine synthesis	5	0.286041	0.0178185	TRUB1, TRUB2, RPUSD3, GAR1, PUS7L
GOTERM_BP_DIRECT	GO:0098696~regulation of neurotransmitter receptor localization to postsynaptic specialization membrane	5	0.286041	0.0178185	TMEM108, DAG1, KIF2C, GPC4, OGT
GOTERM_BP_DIRECT	GO:0032717~negative regulation of interleukin-8 production	5	0.286041	0.0178185	MAPKBP1, ANXA4, BCL3, OTUD7B, CACTIN
GOTERM_BP_DIRECT	GO:0010468~regulation of gene expression	23	1.31579	0.0179158	KDM4A, ZNF142, KDM4B, SORT1, PRDM6, DNMT3A, YBX2, MEFV, ATP1B1, TOB1, TRIM6, PCBP3, ZNF507, CDK3, ZNF407, PCBP2, ZFP64, STX3, TRIM38, LOC703832, TARDBP, ZNF335, TRIM11
GOTERM_BP_DIRECT	GO:0051045~negative regulation of membrane protein ectodomain proteolysis	4	0.228833	0.018253	IL10, TIMP2, LRIG2, PTPN3
GOTERM_BP_DIRECT	GO:0001662~behavioral fear response	7	0.400458	0.0231221	MECP2, ALS2, GNG7, GRIK2, PDE8B, EIF4E, EIF4G1
GOTERM_BP_DIRECT	GO:0071364~cellular response to epidermal growth factor stimulus	7	0.400458	0.0231221	MED1, BLOC1S6, PDPK1, SYAP1, INPP5K, PTPN11, PLCG1
GOTERM_BP_DIRECT	GO:0035999~tetrahydrofolate interconversion	4	0.228833	0.0258567	MTHFD1, MTHFD2, SHMT2, SHMT1
GOTERM_BP_DIRECT	GO:0051966~regulation of synaptic transmission, glutamatergic	6	0.343249	0.0265594	CLN3, GRM5, GRM7, GRM8, PSEN1, DGKI
GOTERM_BP_DIRECT	GO:0032880~regulation of protein localization	12	0.686499	0.0277128	TRIM6, DNAJB6, RAB14, PARP1, ARHGDIA, STX6, DVL3, PLEKHM2, LOC703832, WASL, TRIM38, CSNK1E
GOTERM_BP_DIRECT	GO:0097062~dendritic spine maintenance	3	0.171625	0.0311121	TANC1, CTTN, PICK1
GOTERM_BP_DIRECT	GO:0010882~regulation of cardiac muscle contraction by calcium ion signaling	3	0.171625	0.0311121	ATP2A2, ATP1B1, SLC9A1
GOTERM_BP_DIRECT	GO:0033209~tumor necrosis factor-mediated signaling pathway	8	0.457666	0.0329309	RRAGA, TRAF3IP2, CD70, TRAF3, TRAF5, CDIP1, RELA, RNF41
GOTERM_BP_DIRECT	GO:0051093~negative regulation of developmental process	4	0.228833	0.0348926	DDB1, GSK3A, ERF, BCL2L1
GOTERM_BP_DIRECT	GO:0016188~synaptic vesicle maturation	4	0.228833	0.0348926	UNC13C, SNAPIN, RAB3A, STXBP1
GOTERM_BP_DIRECT	GO:0006895~Golgi to endosome transport	4	0.228833	0.0348926	RAB14, DOP1B, SORT1, CORO7
GOTERM_BP_DIRECT	GO:1990481~mRNA pseudouridine synthesis	4	0.228833	0.0348926	TRUB1, TRUB2, RPUSD3, PUS7L
GOTERM_BP_DIRECT	GO:1901838~positive regulation of transcription of nucleolar large rRNA by RNA polymerase I	4	0.228833	0.0348926	DDX11, PWP1, MTOR, SMARCA4
GOTERM_BP_DIRECT	GO:0099175~regulation of postsynapse organization	6	0.343249	0.0370123	CDC42, TANC1, IL1RAPL1, WASL, PSEN1, DISC1
GOTERM_BP_DIRECT	GO:0042789~mRNA transcription by RNA polymerase II	8	0.457666	0.0370249	MED1, TFCP2, EPAS1, TAF8, RARA, AP3B1, TAF4, SUPT6H
GOTERM_BP_DIRECT	GO:0048812~neuron projection morphogenesis	8	0.457666	0.0370249	ALS2, DAB2IP, ZNF335, NYAP2, PPP1R12B, SRGAP2, GAS7, MAP4K4
GOTERM_BP_DIRECT	GO:0008104~protein localization	15	0.858124	0.0385173	CCDC120, NBEAL1, CSNK1E, PRPF19, SEPTIN9, YWHAZ, SEPTIN7, MECP2, CDC42, RRAGA, BBS10, ERCC3, ALS2, DVL2, DISC1
GOTERM_BP_DIRECT	GO:0032869~cellular response to insulin stimulus	9	0.514874	0.0408842	PARP1, PDPK1, SYAP1, INPP5K, LPIN1, LPIN2, MTOR, USF1, RAB8A
GOTERM_BP_DIRECT	GO:1904263~positive regulation of TORC1 signaling	9	0.514874	0.0408842	OTUD5, RRAGA, SEH1L, MAT2A, RHEB, LOC719232, CUL3, WAC, OGT
GOTERM_BP_DIRECT	GO:0050885~neuromuscular process controlling balance	8	0.457666	0.0414399	BCR, CLN3, GM2A, HERC1, ABL1, NBN, PDE8B, PAFAH1B1
GOTERM_BP_DIRECT	GO:0030030~cell projection organization	8	0.457666	0.0414399	TCHP, IFT43, TCTN3, TCTN2, MKS1, TUBD1, RSPH9, RAB8A
GOTERM_BP_DIRECT	GO:0006260~DNA replication	12	0.686499	0.0417352	GINS1, SLC25A16, POLA2, SUPT16H, SLX4, RECQL5, POLG2, DSCC1, GINS3, ORC2, E4F1, MCM2
GOTERM_BP_DIRECT	GO:0047496~vesicle transport along microtubule	5	0.286041	0.0427916	CLN3, NDE1, HTT, RASGRP1, PAFAH1B1
GOTERM_BP_DIRECT	GO:0000245~spliceosomal complex assembly	5	0.286041	0.0427916	ZRSR2, U2AF2, RSRP1, PRPF19, CRNKL1
GOTERM_BP_DIRECT	GO:0030488~tRNA methylation	6	0.343249	0.0430612	NSUN2, METTL6, THADA, TRMT44, MTO1, FTSJ1
GOTERM_BP_DIRECT	GO:0035729~cellular response to hepatocyte growth factor stimulus	4	0.228833	0.0453322	IL10, MED1, RELA, BCAR1
GOTERM_BP_DIRECT	GO:0050435~amyloid-beta metabolic process	4	0.228833	0.0453322	BACE2, PSEN2, PSEN1, DCAF7
GOTERM_BP_DIRECT	GO:0032570~response to progesterone	4	0.228833	0.0453322	YAP1, WBP2, ABHD2, UBE3A
GOTERM_BP_DIRECT	GO:0006368~transcription elongation by RNA polymerase II	7	0.400458	0.0459024	SUPT16H, TCEA3, LEO1, PAF1, CDK13, SUPT6H, GTF2F2
GOTERM_BP_DIRECT	GO:0008542~visual learning	7	0.400458	0.0459024	MECP2, RIC8A, TANC1, NETO1, SLC7A11, PDE8B, MEIS2
GOTERM_BP_DIRECT	GO:0007264~small GTPase-mediated signal transduction	14	0.800915	0.0476274	ARHGAP27, RASGRP1, RND1, BCR, TIAM2, CDC42, RABIF, LOC106995524, RHEB, RAC2, PIGF, DOCK1, RALGPS1, RALGPS2
GOTERM_BP_DIRECT	GO:0090063~positive regulation of microtubule nucleation	3	0.171625	0.0492696	MECP2, PAK1, DCTN1
GOTERM_BP_DIRECT	GO:0042987~amyloid precursor protein catabolic process	3	0.171625	0.0492696	CLN3, PSEN2, PSEN1
GOTERM_BP_DIRECT	GO:0044725~epigenetic programming in the zygotic pronuclei	3	0.171625	0.0492696	DDB1, SUV39H2, AXIN1
GOTERM_BP_DIRECT	GO:0001944~vasculature development	3	0.171625	0.0492696	RIC8A, CDH5, STK11
GOTERM_BP_DIRECT	GO:0099003~vesicle-mediated transport in synapse	3	0.171625	0.0492696	MKLN1, CLSTN1, RAB7A
GOTERM_BP_DIRECT	GO:0006335~DNA replication-dependent chromatin assembly	3	0.171625	0.0492696	CHAF1B, ASF1A, ASF1B
GOTERM_BP_DIRECT	GO:0050882~voluntary musculoskeletal movement	3	0.171625	0.0492696	VTI1A, ITPR1, MTOR
GOTERM_BP_DIRECT	GO:0030866~cortical actin cytoskeleton organization	6	0.343249	0.0496687	STRIP1, EHD2, EPB41, CAVIN3, EPB41L3, PIGF

## Sheet: GO enrichment of module 3
GO enrichment of module 3 genes
Category	Term	Count	%	Pvalue	Genes
GOTERM_BP_DIRECT	GO:0001649~osteoblast differentiation	3	3.52941	0.0272042	WWOX, CTNNB1, BMP6
GOTERM_BP_DIRECT	GO:0051450~myoblast proliferation	2	2.35294	0.0293501	GPX1, CTNNB1
GOTERM_BP_DIRECT	GO:0045603~positive regulation of endothelial cell differentiation	2	2.35294	0.0365541	CTNNB1, BMP6
GOTERM_BP_DIRECT	GO:0006383~transcription by RNA polymerase III	2	2.35294	0.0365541	GTF3C2, POLR3D
GOTERM_BP_DIRECT	GO:0003323~type B pancreatic cell development	2	2.35294	0.0365541	BMP6, BMP5

## Sheet: GO enrichment of module 4
GO enrichment of module 4 genes
Category	Term	Count	%	Pvalue	Genes
GOTERM_BP_DIRECT	GO:0006355~regulation of DNA-templated transcription	34	7.98122	2.01077e-05	ZNF155, WWC2, CTR9, LOC710661, SCML2, TAF1D, LOC694126, LOC114674199, ZNF549, NSD2, LOC698907, ZNF426, ZNF689, ZNF667, KAT7, LRRFIP2, ZNF248, LRRFIP1, PKNOX1, ZNF566, ZNF268, ZNF684, ZNF483, ZNF460, ZNF680, ZNF184, ZNF182, PRMT3, ZBTB11, LOC106992311, LOC713879, HBP1, ZNF354A, ZNF850
GOTERM_BP_DIRECT	GO:0016567~protein ubiquitination	17	3.99061	0.00105722	PPIL2, KLHL15, CUL2, FBXO10, CBL, PJA2, KLHL9, DCAF1, RNF115, HECTD1, KLHL8, SDE2, MDM4, TRIM59, ARIH1, FBXO5, SOCS4
GOTERM_BP_DIRECT	GO:0000122~negative regulation of transcription by RNA polymerase II	27	6.33803	0.00347864	WWC2, CTR9, DDX20, LOC710661, FNBP1L, DCAF1, TRIM29, MIER1, NSD2, LOC698907, ZNF248, TAF9B, ZNF566, ZNF268, ZNF684, ZNF460, NR1H2, ZBTB11, LOC100425528, LOC106992311, CNOT1, PHF14, MDM4, EZR, MXD1, ZNF136, EZH2
GOTERM_BP_DIRECT	GO:0031623~receptor internalization	5	1.17371	0.00548933	RALB, TFRC, CLTC, CD9, EZR
GOTERM_BP_DIRECT	GO:0007020~microtubule nucleation	4	0.938967	0.00692155	SLAIN2, TUBGCP3, TUBGCP4, NDEL1
GOTERM_BP_DIRECT	GO:0030316~osteoclast differentiation	5	1.17371	0.00731627	FARP2, CREB1, OSTM1, TFRC, PIK3R1
GOTERM_BP_DIRECT	GO:0006886~intracellular protein transport	12	2.8169	0.0104763	AP3M2, COPB2, RAB5B, SEC24B, SCFD1, AP1G1, RAB23, CSE1L, CLTC, XPO7, VPS35, RAB6A
GOTERM_BP_DIRECT	GO:0006457~protein folding	8	1.87793	0.0106254	PDIA3, CCT2, PPIL2, LOC114672113, HSPA4, HSPA4L, CDC37L1, CCT6B
GOTERM_BP_DIRECT	GO:0050821~protein stabilization	9	2.11268	0.0159377	CCT2, CREB1, BRINP1, MCM8, CDC37L1, MDM4, NAA16, PIK3R1, TAF9B
GOTERM_BP_DIRECT	GO:0034976~response to endoplasmic reticulum stress	5	1.17371	0.0223233	PDIA3, LOC114672113, TMX1, UBA5, PIK3R1
GOTERM_BP_DIRECT	GO:0006826~iron ion transport	4	0.938967	0.0232475	TFRC, SLC41A2, SLC11A2, B2M
GOTERM_BP_DIRECT	GO:0016579~protein deubiquitination	6	1.40845	0.0260631	ATXN3, USP48, USP37, USP4, USP3, USP45
GOTERM_BP_DIRECT	GO:0043066~negative regulation of apoptotic process	12	2.8169	0.0338973	BNIP3L, CREB1, TFRC, LOC694887, LOC702864, MDM4, NAA16, PIK3R1, LOC698256, TAF9B, CBL, ZNF268
GOTERM_BP_DIRECT	GO:0006828~manganese ion transport	3	0.704225	0.034926	SLC41A2, SLC11A2, ATP2C1
GOTERM_BP_DIRECT	GO:0006357~regulation of transcription by RNA polymerase II	41	9.62441	0.0369983	DIDO1, PRDM4, CHD1, PHF8, LOC114674199, ZSCAN32, ZNF549, LOC698907, ZNF426, ZNF689, ZNF667, KAT7, ZNF248, LRRFIP1, PKNOX1, ZNF566, ZNF268, ZNF684, LOC720413, ZNF483, ZNF680, ZNF184, ZNF182, FOXJ3, STAT3, ARNT, LOC100425528, LOC106992311, CREB1, KLF5, LOC713879, ZSCAN22, LOC698779, LOC100423287, PHF14, HBP1, ZNF354A, MXD1, ZNF136, ZNF850, ZNF574
GOTERM_BP_DIRECT	GO:0014013~regulation of gliogenesis	2	0.469484	0.039389	NF2, EZH2
GOTERM_BP_DIRECT	GO:0006511~ubiquitin-dependent protein catabolic process	9	2.11268	0.040618	ATE1, RNF115, HECTD1, EDEM1, CUL2, MDM4, ARIH1, FBXO10, CBL
GOTERM_BP_DIRECT	GO:0090307~mitotic spindle assembly	4	0.938967	0.044878	KLF5, ABRAXAS1, NEK2, ABRAXAS2

## Sheet: GO enrichment of module 5
GO enrichment of module 5 genes
Category	Term	Count	%	Pvalue	Genes
GOTERM_BP_DIRECT	GO:0006465~signal peptide processing	3	2.72727	0.00214092	SPCS2, LOC707684, PARL
GOTERM_BP_DIRECT	GO:0044772~mitotic cell cycle phase transition	3	2.72727	0.00438425	CCNB1, CCNI, CCNG2
GOTERM_BP_DIRECT	GO:0006260~DNA replication	4	3.63636	0.00767462	POLB, RFC1, LOC696801, RBBP7
GOTERM_BP_DIRECT	GO:0000079~regulation of cyclin-dependent protein serine/threonine kinase activity	3	2.72727	0.00971945	CCNB1, CCNI, CCNG2
GOTERM_BP_DIRECT	GO:0006281~DNA repair	5	4.54545	0.0120052	POLB, DCLRE1A, RFC1, LOC696801, RAD1
GOTERM_BP_DIRECT	GO:0065003~protein-containing complex assembly	3	2.72727	0.0348447	BECN1, NEMF, SSBP3
GOTERM_BP_DIRECT	GO:0000082~G1/S transition of mitotic cell cycle	3	2.72727	0.0359318	CCNB1, CCNI, CCNG2
GOTERM_BP_DIRECT	GO:0033628~regulation of cell adhesion mediated by integrin	2	1.81818	0.0391053	LYN, LPXN
GOTERM_BP_DIRECT	GO:0034144~negative regulation of toll-like receptor 4 signaling pathway	2	1.81818	0.048643	LYN, TAX1BP1

## Sheet: GO enrichment of module 6
GO enrichment of module 6 genes
Category	Term	Count	%	Pvalue	Genes
GOTERM_BP_DIRECT	GO:0051301~cell division	23	5.16854	4.47102e-10	TIGAR, BORA, CDCA4, SEPTIN2, USP44, SPICE1, CDCA7, CDCA8, CDC5L, CDC7, GNAI1, AURKA, CCAR1, SGO2, TPX2, ASPM, PARD6A, ZNF805, CCNE1, CCNG1, CDC27, MED20, ANAPC1
GOTERM_BP_DIRECT	GO:0000723~telomere maintenance	7	1.57303	0.000303574	DCLRE1B, BLM, RIF1, CCNE1, PRKDC, ACTL6A, POT1
GOTERM_BP_DIRECT	GO:0015031~protein transport	16	3.59551	0.00128762	ARF4, NMD3, KTN1, GLE1, SEC61A2, TOM1L1, DOP1A, SNX14, SNX25, PPT1, LOC709254, NUP88, SEC22A, BBS5, RAB5A, SEC31A
GOTERM_BP_DIRECT	GO:0010165~response to X-ray	4	0.898876	0.00166199	BLM, MSH2, ERCC8, LIG4
GOTERM_BP_DIRECT	GO:0007091~metaphase/anaphase transition of mitotic cell cycle	3	0.674157	0.0040626	CDC27, BUB1B, ANAPC1
GOTERM_BP_DIRECT	GO:0010332~response to gamma radiation	4	0.898876	0.00475929	TIGAR, PRKDC, TTC33, LIG4
GOTERM_BP_DIRECT	GO:0016601~Rac protein signal transduction	4	0.898876	0.00657866	TIAM1, NCKAP1, CDH13, WASF1
GOTERM_BP_DIRECT	GO:0007018~microtubule-based movement	7	1.57303	0.00691342	CENPE, DNAH12, KIF18A, KIF5B, KIF20B, KIF27, KTN1
GOTERM_BP_DIRECT	GO:0008380~RNA splicing	8	1.79775	0.00737305	BCLAF1, RBM25, DDX47, CWC22, CRIPT, STRAP, USB1, LOC713553
GOTERM_BP_DIRECT	GO:0016579~protein deubiquitination	7	1.57303	0.00775662	USP36, USP8, CYLD, USP9X, USP44, USP33, USP39
GOTERM_BP_DIRECT	GO:0007004~telomere maintenance via telomerase	4	0.898876	0.0113156	DKC1, PTGES3, RPA1, POT1
GOTERM_BP_DIRECT	GO:0000070~mitotic sister chromatid segregation	4	0.898876	0.0113156	KIF18A, NCAPG2, CENPK, CDCA8
GOTERM_BP_DIRECT	GO:0006281~DNA repair	10	2.24719	0.0116819	DCLRE1B, MBD4, BLM, PAXIP1, TAOK3, RRM2B, ATRX, RPA1, TTF2, RAD9B
GOTERM_BP_DIRECT	GO:0034063~stress granule assembly	4	0.898876	0.0142578	YTHDF3, OGFOD1, UBAP2L, C9ORF72
GOTERM_BP_DIRECT	GO:0006397~mRNA processing	9	2.02247	0.0156875	BCLAF1, RBM25, CWC22, CRIPT, STRAP, PABPC1, USP39, PRMT9, LOC713553
GOTERM_BP_DIRECT	GO:0051321~meiotic cell cycle	5	1.1236	0.0193968	PPP2CA, RPA1, TMEM131L, RBM46, AURKA
GOTERM_BP_DIRECT	GO:0070536~protein K63-linked deubiquitination	4	0.898876	0.0194099	USP8, CYLD, USP9X, USP33
GOTERM_BP_DIRECT	GO:0007129~homologous chromosome pairing at meiosis	4	0.898876	0.0194099	TERB1, SUN1, SPATA22, CCNE1
GOTERM_BP_DIRECT	GO:0032880~regulation of protein localization	6	1.34831	0.0202739	FKBP1A, USP8, BORA, CCNE1, SEPTIN2, C9ORF72
GOTERM_BP_DIRECT	GO:0007029~endoplasmic reticulum organization	4	0.898876	0.0233424	ATL2, TMCC1, TMEM38B, SEC31A
GOTERM_BP_DIRECT	GO:0006406~mRNA export from nucleus	4	0.898876	0.0324025	FYTTD1, THOC3, NUP88, NUP160
GOTERM_BP_DIRECT	GO:2001034~positive regulation of double-strand break repair via nonhomologous end joining	3	0.674157	0.0327129	RIF1, PRKDC, LOC114678803
GOTERM_BP_DIRECT	GO:0006897~endocytosis	8	1.79775	0.0338129	NECAP2, BIN3, USP33, MYO6, PPT1, CLINT1, C9ORF72, RAB5A
GOTERM_BP_DIRECT	GO:0071479~cellular response to ionizing radiation	4	0.898876	0.0349146	BARD1, BLM, LIG4, RAD9B
GOTERM_BP_DIRECT	GO:0000082~G1/S transition of mitotic cell cycle	5	1.1236	0.0350511	PPP6C, CCNE1, CCNG1, MED20, SKP2
GOTERM_BP_DIRECT	GO:0007098~centrosome cycle	4	0.898876	0.0402311	PCM1, PPP1R12A, PARD6A, AURKA
GOTERM_BP_DIRECT	GO:0097355~protein localization to heterochromatin	2	0.449438	0.0407811	TASOR, PPHLN1
GOTERM_BP_DIRECT	GO:0030330~DNA damage response, signal transduction by p53 class mediator	3	0.674157	0.0419921	PAXIP1, MYO6, ATRX
GOTERM_BP_DIRECT	GO:0141198~protein branched polyubiquitination	3	0.674157	0.0419921	TRAF6, CDC27, ANAPC1
GOTERM_BP_DIRECT	GO:0042752~regulation of circadian rhythm	4	0.898876	0.0430339	TOP2A, USP9X, PRKDC, TTC33
GOTERM_BP_DIRECT	GO:0016567~protein ubiquitination	13	2.92135	0.0431667	MYLIP, RNF13, WDSUB1, LTN1, KLHL3, TMEM131L, PPP2CA, TRAF6, CDC27, RLIM, KCTD13, FBXL5, BBS5
GOTERM_BP_DIRECT	GO:0045190~isotype switching	3	0.674157	0.0469565	MSH2, LIG4, UNG
GOTERM_BP_DIRECT	GO:0060236~regulation of mitotic spindle organization	3	0.674157	0.0469565	TPX2, BORA, GNAI1
GOTERM_BP_DIRECT	GO:0051642~centrosome localization	3	0.674157	0.0469565	SUN1, KIF5B, AURKA

## Sheet: GO enrichment of module 7
GO enrichment of module 7 genes
Category	Term	Count	%	Pvalue	Genes
GOTERM_BP_DIRECT	GO:0045893~positive regulation of DNA-templated transcription	8	4.7619	0.00393772	ZFHX3, PCID2, CHURC1, TPRG1, IRF2, TP53INP1, EAF1, TCF3
GOTERM_BP_DIRECT	GO:0072657~protein localization to membrane	3	1.78571	0.0102337	ANO1, FERMT2, TM9SF3
GOTERM_BP_DIRECT	GO:0006338~chromatin remodeling	5	2.97619	0.0260562	SATB1, TPRG1, JARID2, GATAD2B, BRDT
GOTERM_BP_DIRECT	GO:0048536~spleen development	3	1.78571	0.0275651	PCID2, JARID2, RCBTB2
GOTERM_BP_DIRECT	GO:0000281~mitotic cytokinesis	3	1.78571	0.0333323	NUSAP1, SPTBN1, CIT
GOTERM_BP_DIRECT	GO:0030859~polarized epithelial cell differentiation	2	1.19048	0.0344924	TPRG1, ZDHHC7
GOTERM_BP_DIRECT	GO:0031122~cytoplasmic microtubule organization	3	1.78571	0.0427721	SLK, HIGD1A, CAMSAP1

## Sheet: GO enrichment of module 8
GO enrichment of module 8 genes
Category	Term	Count	%	Pvalue	Genes
GOTERM_BP_DIRECT	GO:0072344~rescue of stalled ribosome	3	1.69492	0.0183116	SAYSD1, ASCC3, KLHDC10
GOTERM_BP_DIRECT	GO:2000628~regulation of miRNA metabolic process	2	1.12994	0.0206778	DROSHA, RC3H1
GOTERM_BP_DIRECT	GO:0045815~transcription initiation-coupled chromatin remodeling	3	1.69492	0.0271685	TRMT112, VPS72, TP53
GOTERM_BP_DIRECT	GO:0071459~protein localization to chromosome, centromeric region	2	1.12994	0.0475896	MIS18A, CENPA
