# Supplementary material
Source: Research Square preprint supplement (doi:10.21203/rs.3.rs-7771199/v1)
Supplement: Supplementary file 1 [file 148645d4e3fd5c6c1a02aeb8.pdf]

## Supplementary materials for

Reproductive aging causes precocious ZGA and morula gene expression and chromatin  
hyper-activation in rhesus monkey embryos via maternal SETDB1 insufficiency

Jie Jin *et al*

Corresponding author: Ping Zheng, [zhengp@mail.kiz.ac.cn](mailto:zhengp@mail.kiz.ac.cn)

### The PDF file includes:

Extended Data Figs. 1-10

Supplementary Tables 1-5

### Other Supplementary Material for this manuscript includes the following:

Supplementary Data 1-17

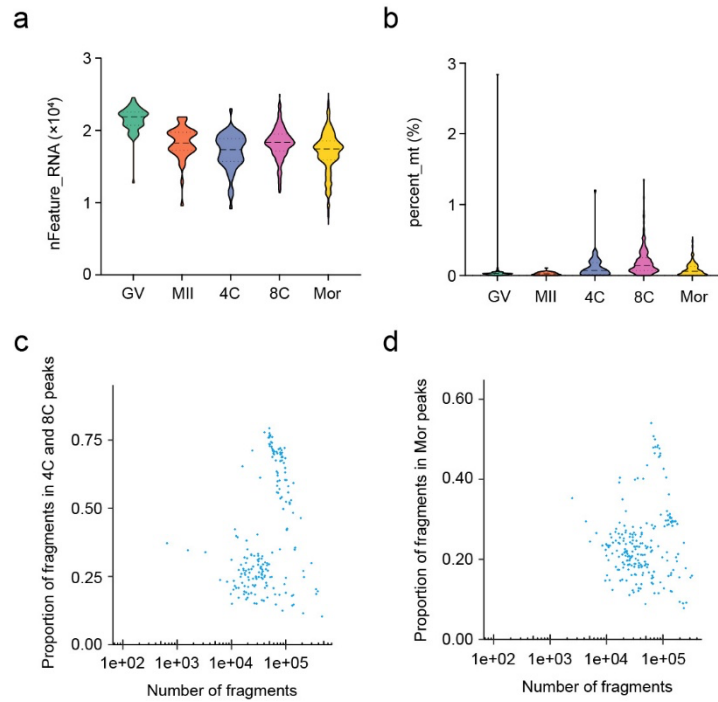

**Extended Data Fig. 1. Quality control of scRNA-seq and scATAC-seq data.**

**(a)** The numbers of genes expressed in scRNA-seq data. GV, Germinal Vesicle Oocyte; MII, Metaphase II oocyte; 4C, 4C embryo; 8C, 8C embryo; Mor, morula embryo.

**(b)** The proportions of mitochondrial gene expression in scRNA-seq data.

**(c)** Quality control of scATAC-seq data from 4C and 8C embryos. The x-axis shows the fragment count. The y-axis shows signal-to-noise ratio.

**(d)** Quality control of scATAC-seq data from morula embryos. The x-axis shows the fragment count. The y-axis shows signal-to-noise ratio.

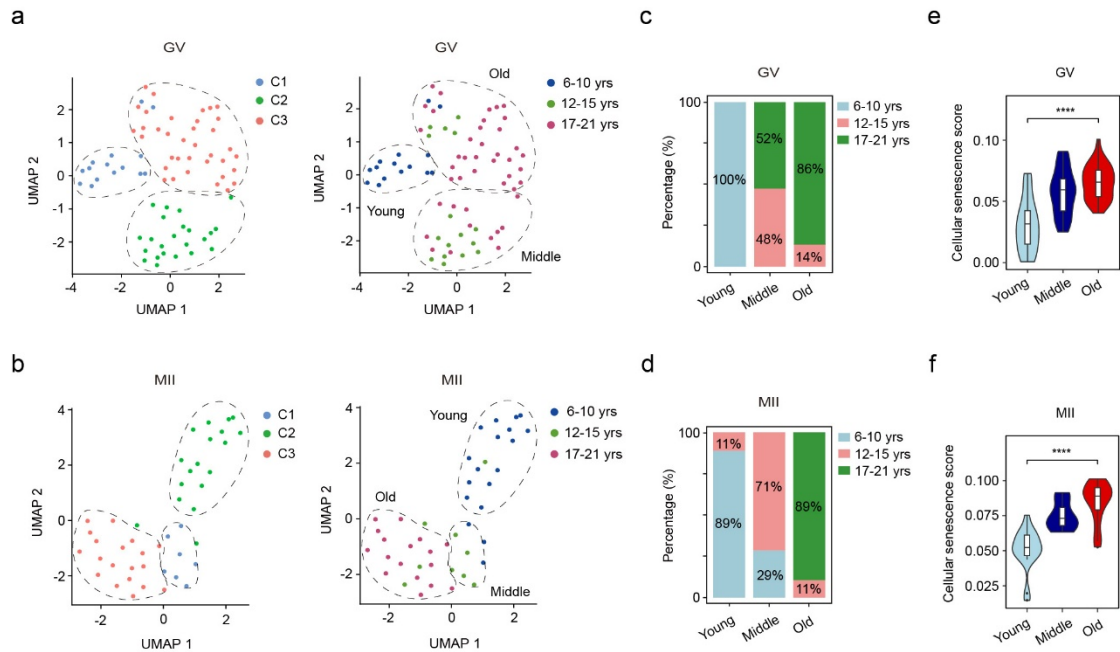

**Extended Data Fig. 2. Classification of single GV and MII oocytes by UMAP-based analysis.**

(a, b) UMAP analysis identified three clusters of single GV (a) and MII (b) oocytes, representing young, middle-aged and old samples.

(c, d) Cell compositions of each cluster for GV (c) and MII (d) oocytes.

(e, f) Gene set score analysis of cellular senescence genes showed that old cluster had significantly higher senescence score than young cluster for GV (e) and MII (f) oocytes.

Data were analyzed by one-way ANOVA with Tukey's test (e) or the Kruskal-Wallis test followed

by Dunn's test (f). \*\*\*\* $P < 0.0001$ .

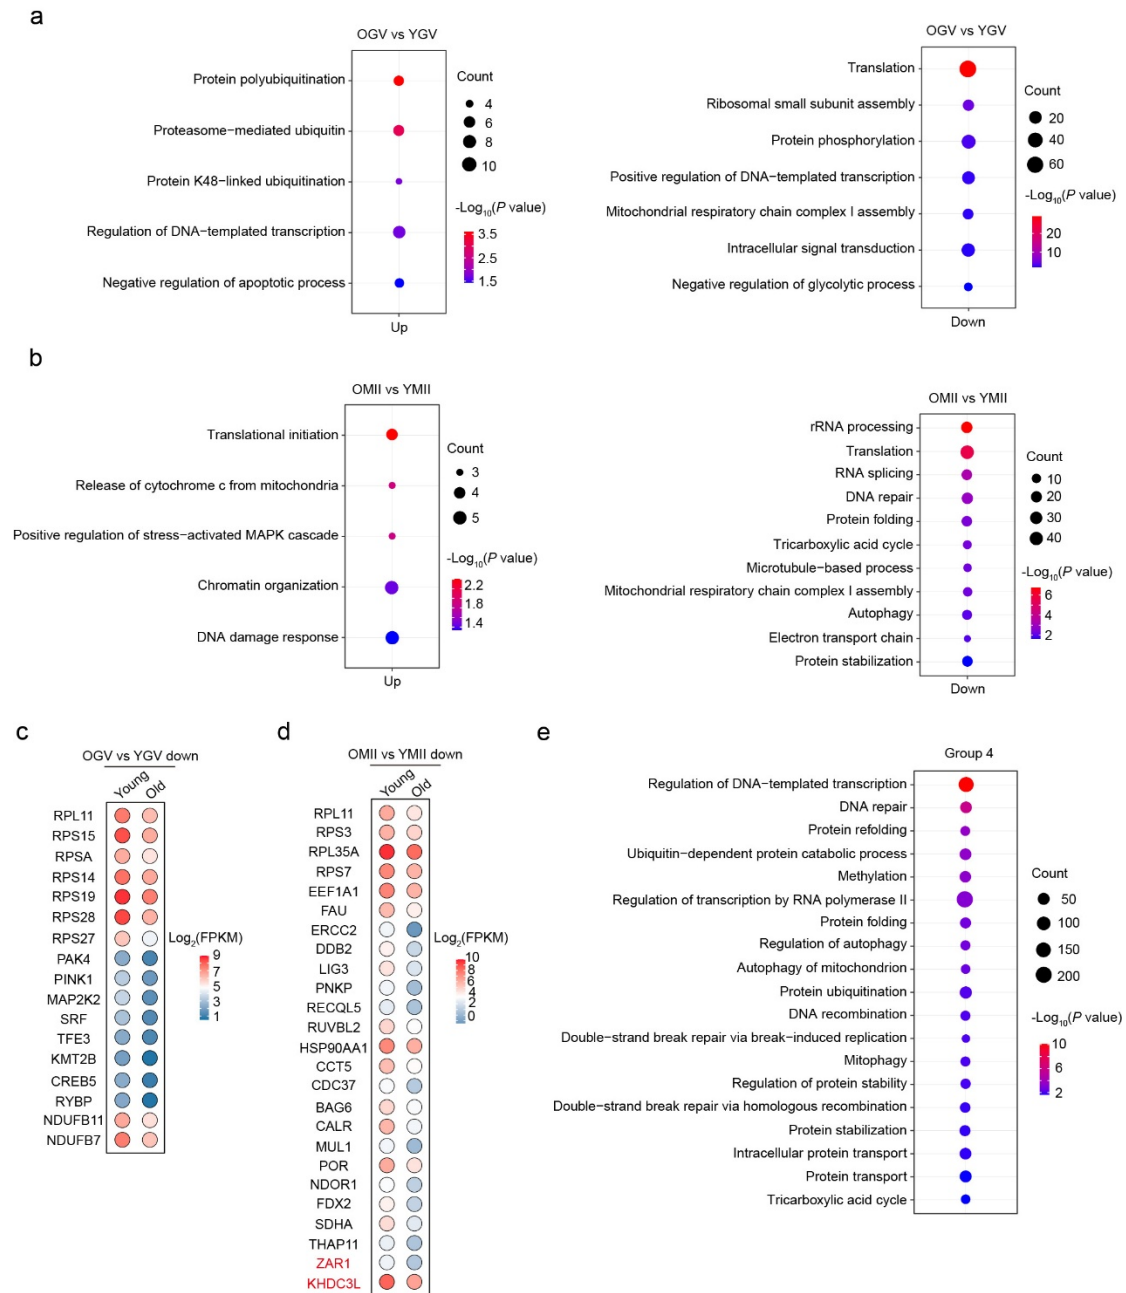

**Extended Data Fig. 3. Impairment of maternal mRNA expressions and dynamics during meiosis**

**in old oocytes.**

**(a)** Top biological processes enriched for up-regulated (left panel) and down-regulated (right panel) DEGs in old GV oocytes compared to young GV counterparts.

**(b)** Top biological processes enriched for up-regulated (left panel) and down-regulated (right panel) DEGs in old MII eggs compared to young MII counterparts.

(c, d) Example genes showing down-regulation in old GV (c) or MII (d) oocytes compared to young counterparts.

(e) Top biological processes enriched for 2806 genes (group 4) showing premature degradation during GV-MII transition in old oocytes.

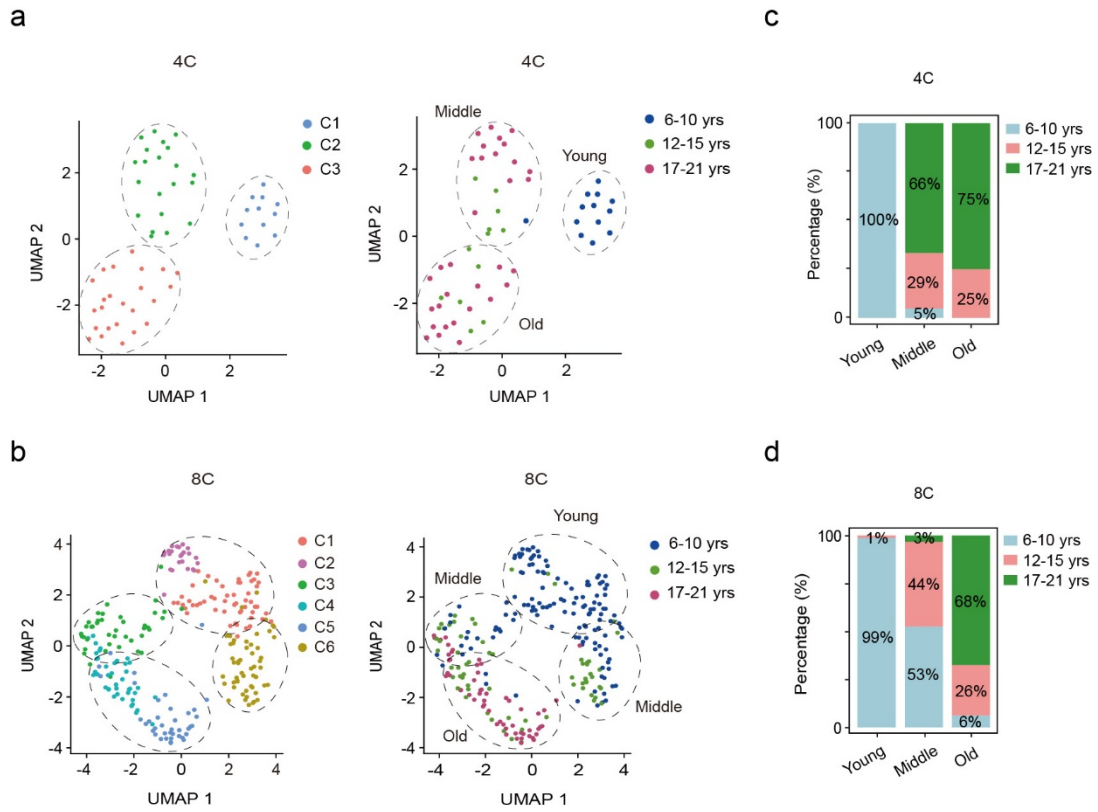

**Extended Data Fig. 4. Classification of single 4C and 8C blastomeres by UMAP-based analysis.**

(a, b) UMAP analysis identified three clusters of single 4C (a) and 8C (b) blastomeres, representing young, middle-aged and old samples.

(c, d) Cell composition of each cluster for 4C (c) and 8C (d) blastomeres.



**Extended Data Fig. 5. Precocious and excessive ZGA genes expression in aged monkey 4C and 8C embryos.**

(a) Heatmap showing the relative expression of 874 major ZGA genes in young monkey embryos.

(b) Relative expression of C1 ZGA genes (precocious expression in O4C), C2 ZGA genes (excessive expression in O8C), and C3 ZGA genes (reduced expression in O8C).

(c-e) Top biological processes enriched for C1 (c), C2 (d), and C3 (e) ZGA genes.

(f) Volcano plots showing up-regulated and down-regulated DEGs in old 4C (O4C) embryos relative to young 4C (Y4C) counterparts.

(g) Relative expression of some epigenetic genes in O4C and Y4C embryos.

(h) Top biological processes enriched for up-regulated DEGs (upper panel) and down-regulated DEGs (lower panel) in O4C compared to Y4C embryos.

(i) Volcano plots showing up-regulated and down-regulated DEGs in old 8C (O8C) embryos compared to young 8C (Y8C) counterparts.

(j) Top biological processes enriched for up-regulated DEGs (upper panel) and down-regulated DEGs (lower panel) in O8C compared to Y8C embryos.

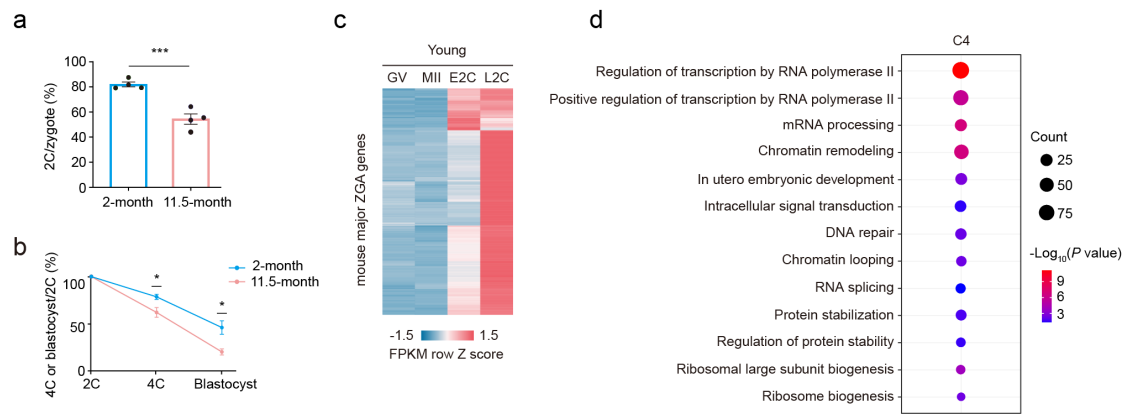

**Extended Data Fig. 6. Precocious and excessive ZGA is not conserved in aged mouse embryos**

**(a)** Percentages of zygotes progressing to 2C after fertilization by ICSI. MII eggs were collected from 2-month old and 11.5-month old females.

**(b)** Percentages of 2C embryos progressing to 4C and blastocyst stages in young and old mice.

**(c)** Heatmap showing the relative expression of 1274 major ZGA genes in young mouse embryos.

**(d)** Top biological processes enriched for the majority (79.7%) of mouse ZGA genes (C4) not affected by reproductive aging.

Data in (a, b) were expressed as mean  $\pm$  SEM and were analyzed by a two-tailed Student's *t*-test.

\* $P < 0.05$ , \*\*\* $P < 0.001$ .

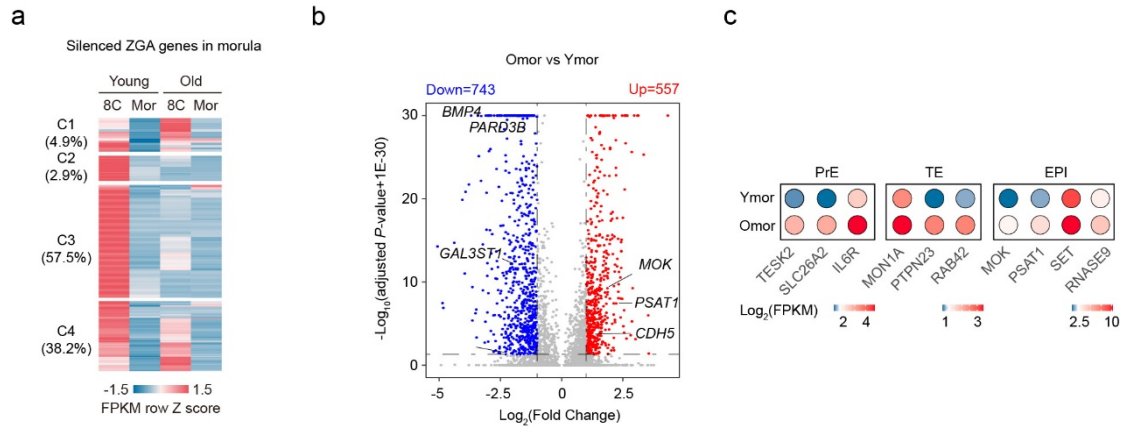

**Extended Data Fig. 7. Expression of morula-stage genes in aged monkey embryos.**

(a) Heatmap showing the aberrant expression of 306 ZGA genes which are subject to silencing in young morula. 15 ZGA genes (4.9%) in C1 showed compromised silencing in old morula.

(b) Volcano plots showing the up-regulated and down-regulated DEGs in old morulae (Omor) relative to young morulae (Ymor).

(c) Compared to young morulae, old morulae expressed higher level of lineage genes (trophectoderm, TE: *MON1A*, *PTPN23*, *RAB42*; epiblast, EPI: *MOK*, *PSAT1*, *SET*, *RNASE9*; primitive endoderm, PrE: *TESK2*, *SLC26A2*, *IL6R*).

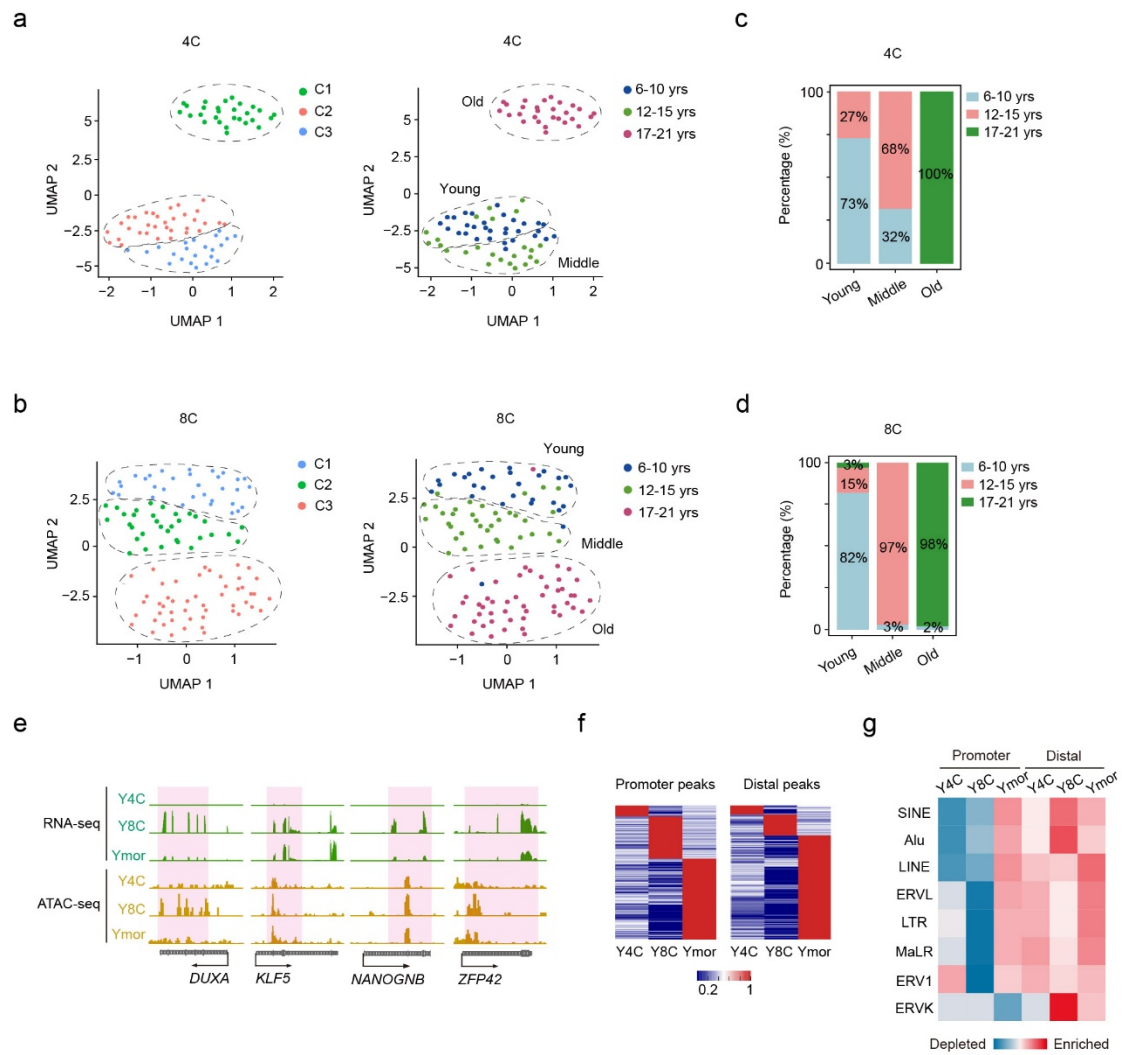

**Extended Data Fig. 8. Chromatin accessibility analyses in monkey embryos.**

**(a, b)** Using scATAC-seq data, UMAP analysis grouped 4C (a) and 8C (b) blastomeres into three clusters, representing young, middle-aged and old samples.

**(c, d)** Cell composition of each cluster for 4C (c) and 8C (d) blastomeres.

**(e)** Several representative ZGA genes (*DUXA*, *KLF5*, *NANOGNG*, *ZFP42*) showed concordant ATAC-seq and RNA-seq signals, indicating the high quality of scATAC-seq data.

**(f)** Stage-prevalent ATAC-seq peaks at promoters ( $\pm 2500$  bp from TSS) and nearby distal regions in young embryos.

**(g)** Transposable elements (TEs) resided in promoters and distal peaks of young 4C, 8C, and



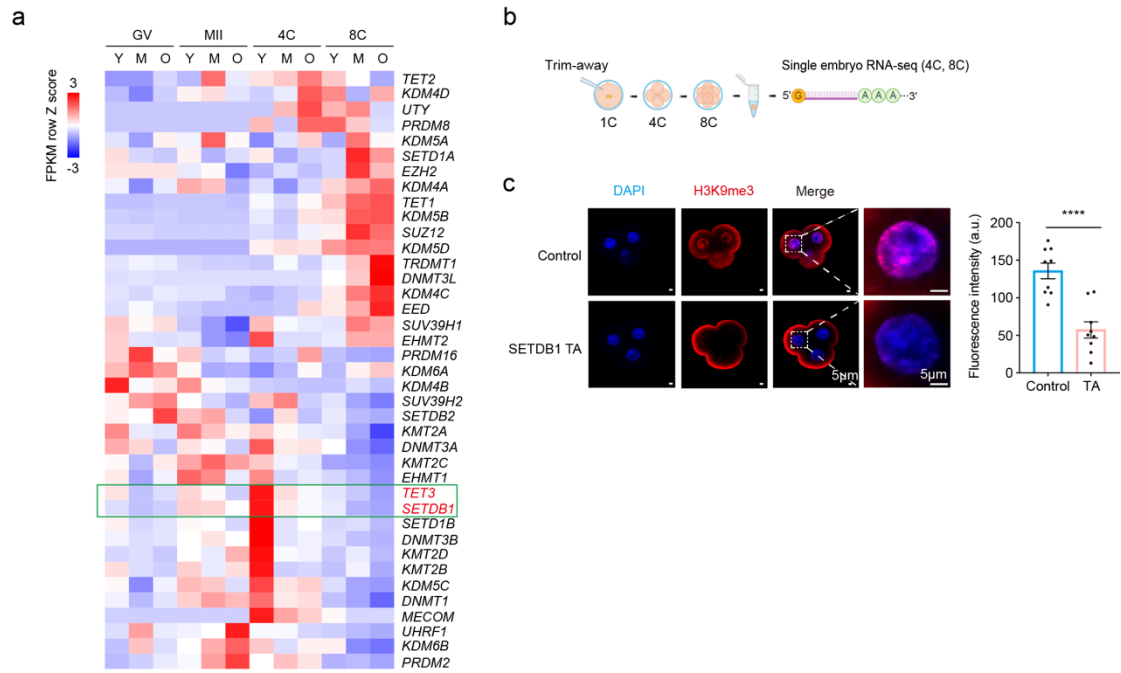

**Extended Data Fig. 10. Knock down maternal SETDB1 in monkey embryos via trim-away.**

**(a)** Heatmap showing the relative expression levels (FPKM) of epigenetic regulators involved in methylation of DNA, H3K27, H3K9, and H3K4 in GV to 8C embryos from different age groups.

**(b)** Schematic showing trim-away (TA) knockdown strategy and sample collection in monkey embryos.

**(c)** TA efficiency was tested in mouse embryos. Immunostaining showed the significantly reduced H3K9me3 level.

Data in (c) were expressed as mean  $\pm$  SEM and were analyzed by a two-tailed Student's *t*-test.

\*\*\*\*  $P < 0.0001$ .

**Supplementary Table 1. Information of the monkey samples for scRNA-seq and scATAC-seq.**

**Samples of scRNA-seq**

| Stage  | No. of single cells |
|--------|---------------------|
| GV     | 74                  |
| MII    | 44                  |
| 4C     | 57                  |
| 8C     | 253                 |
| Morula | 135                 |
| Total  | 563                 |

**Samples of scATAC-seq**

| Stage  | No. of single cells |
|--------|---------------------|
| 4C     | 83                  |
| 8C     | 116                 |
| Morula | 217                 |
| Total  | 416                 |

**Supplementary Table 2. Information of the mouse samples for RNA-seq.**

| Stage | Total No. of samples | No. of samples from 2-month-old mice | No. of samples from 11.5-month-old mice |
|-------|----------------------|--------------------------------------|-----------------------------------------|
| GV    | 3                    | 3                                    | 0                                       |
| MII   | 3                    | 3                                    | 0                                       |
| E2C   | 14                   | 8                                    | 6                                       |
| L2C   | 14                   | 8                                    | 6                                       |

**Note:** Each oocyte sample contains 9-12 oocytes; each embryo sample contains one embryo.

**Supplementary Table 3. Information of scRNA-seq samples from morula stage embryos.**

| Grouping by embryo donor age | No. of single cells |
|------------------------------|---------------------|
| Young (6-10 years old)       | 72                  |
| Old ( $\geq 17$ years old)   | 63                  |
| Total                        | 135                 |

**Supplementary Table 4. Information of scATAC-seq samples from morula stage embryos.**

| Grouping by embryo donor age | No. of single cells |
|------------------------------|---------------------|
| Young (6-10 years old)       | 156                 |
| Old ( $\geq 17$ years old)   | 61                  |
| Total                        | 217                 |

**Supplementary Table 5. Primers for qRT-PCR.**

| Name             | Sequences                     |
|------------------|-------------------------------|
| <i>DUXA</i> -F   | 5'-CCCAGGTTACGCTACCAAACA-3'   |
| <i>DUXA</i> -R   | 5'-CCAGGTTGATCTTGCCCTG-3'     |
| <i>KDM5B</i> -F  | 5'-AAGAGTAGCATCAAGCAAGA-3'    |
| <i>KDM5B</i> -R  | 5'-CACATAAGAGACAGACATACAG-3'  |
| <i>KLF5</i> -F   | 5'-TGCATCTGTCTCTGTGATTACCA-3' |
| <i>KLF5</i> -R   | 5'-AAATGTCTAGGCTCCGCGTC-3'    |
| <i>POU5F1</i> -F | 5'-GAGAACCGAGTGAGAGGCAG-3'    |
| <i>POU5F1</i> -R | 5'-CACACTCGGACCACATCCTT-3'    |
| <i>DPPA2</i> -F  | 5'-TACCACTCGCAGGAGGATGA-3'    |
| <i>DPPA2</i> -R  | 5'-TAGCACAGTCGGGGCATAAC-3'    |
| <i>GATA6</i> -F  | 5'-GTGCCAGACCACTTGCTAT-3'     |
| <i>GATA6</i> -R  | 5'-CCCTGAGGCTGTAGGTTGTG-3'    |
| <i>EED</i> -F    | 5'-GGCAAGATGGAAGATGATATAG-3'  |
| <i>EED</i> -R    | 5'-CGAATAGCAGCACCACAT-3'      |
| <i>DNMT3L</i> -F | 5'-CCATAAGGAGCAGCAGGCAG-3'    |
| <i>DNMT3L</i> -R | 5'-GGGGGAGAAAGCAGTTCTTCA-3'   |
| <i>RFPL4A</i> -F | 5'-CCAGCAGTATGCCTATGACCCC-3'  |
| <i>RFPL4A</i> -R | 5'-ACTGGCTGGATTGATCAGAGGA-3'  |
| <i>SETDB1</i> -F | 5'-AGATGTCTGGAGAACTAAGC-3'    |
| <i>SETDB1</i> -R | 5'-TGTCTGGATGGCAATAAGG-3'     |
| <i>TET3</i> -F   | 5'-CAAGACACCTCGCAAGTT-3'      |
| <i>TET3</i> -R   | 5'-CGGCAGTCAATCGCTATT-3'      |
| <i>GAPDH</i> -F  | 5'-GAGAACGGGAAGCTCGTCAT-3'    |
| <i>GAPDH</i> -R  | 5'-TCGCCCCACTTGATTTTGA-3'     |
