# Supplementary material
Source: Research Square preprint supplement (doi:10.21203/rs.3.rs-7771199/v1)
Supplement: Supplementary file 2 [file 262bf19f0557a17e3e9e23d4.xlsx]

## Sheet: DEG in O8C vs Y8C
Differentially expressed genes in O8C vs Y8C
Gene symbol	P-value	Log2FoldChange	Adjusted P-value	Status
A1BG	9.84685e-18	1.28803	3.12559e-13	down
A4GNT	3.37928e-09	2.69114	0.000107265	down
AASDH	1.91202e-27	1.41031	6.06914e-23	down
ABAT	5.77798e-26	1.61148	1.83405e-21	down
ABCA15	2.64583e-20	1.31217	8.39839e-16	down
ABCA4	1.29082e-47	1.49031	4.09732e-43	down
ABCB4	5.86844e-27	2.84891	1.86276e-22	down
ABCB9	9.17373e-37	2.47022	2.91193e-32	down
ABCC1	3.26977e-09	1.05951	0.000103789	down
ABCC4	1.86374e-07	1.1751	0.00591588	down
ABCD3	1.64196e-30	2.35118	5.2119e-26	down
ABI3BP	2.04569e-53	3.30342	6.49343e-49	down
ABL1	9.855e-23	1.61264	3.12817e-18	down
ABLIM1	3.42876e-55	3.20691	1.08836e-50	down
ABO	1.99303e-08	2.30461	0.000632626	down
ABRAXAS1	1.22826e-12	1.18579	3.89875e-08	down
ACAD11	1.43143e-45	2.97401	4.54366e-41	down
ACADM	9.88071e-18	1.0784	3.13634e-13	down
ACAP2	5.91845e-27	1.71008	1.87863e-22	down
ACAT2	1.09668e-14	2.01425	3.48109e-10	down
ACCSL	7.08894e-40	4.27503	2.25017e-35	down
ACE2	1.11841e-38	3.55071	3.55006e-34	down
ACR	3.17226e-21	1.52062	1.00694e-16	down
ACSM1	5.9874e-47	2.44587	1.90052e-42	down
ACTL8	2.84709e-23	2.76826	9.03724e-19	down
ACTN4	2.41629e-11	1.22014	7.6698e-07	down
ACTR2	6.5383e-17	1.20281	2.07539e-12	down
ACTR3B	9.49176e-24	2.36946	3.01287e-19	down
ACVR1B	1.78814e-35	2.05675	5.67591e-31	down
ACVR1C	3.13613e-14	1.45322	9.9547e-10	down
ACVR2A	5.01505e-19	1.35768	1.59188e-14	down
ACYP1	8.1932e-08	2.03648	0.00260068	down
ADA	5.66141e-24	3.21438	1.79705e-19	down
ADAD1	2.75348e-40	3.41301	8.74011e-36	down
ADAM10	3.86943e-14	1.35458	1.22824e-09	down
ADAM17	1.12131e-07	1.09229	0.00355926	down
ADAM19	1.25536e-55	2.3233	3.98478e-51	down
ADAMTS3	1.38e-49	3.02888	4.38039e-45	down
ADAMTS9	1.56693e-60	3.39891	4.97375e-56	down
ADAMTSL1	6.90424e-57	2.25533	2.19154e-52	down
ADAMTSL2	7.52817e-21	2.26499	2.38959e-16	down
ADAMTSL3	6.80533e-37	2.9306	2.16015e-32	down
ADAR	1.81554e-52	3.29208	5.76289e-48	down
ADCY3	1.12343e-54	3.0046	3.56598e-50	down
ADCY5	3.47673e-24	1.04669	1.10358e-19	down
ADCY7	6.57382e-36	1.62696	2.08666e-31	down
ADD2	1.27791e-53	2.82678	4.05633e-49	down
ADD3	4.47462e-54	3.94629	1.42033e-49	down
ADGRA3	6.13108e-28	2.56715	1.94613e-23	down
ADGRD1	4.99213e-31	1.49543	1.5846e-26	down
ADGRG1	4.3253e-27	3.07181	1.37294e-22	down
ADGRG3	8.58979e-09	1.60153	0.000272657	down
ADGRG6	2.97952e-22	2.13946	9.45759e-18	down
ADGRG7	8.15597e-79	4.17869	2.58887e-74	down
ADGRL3	4.56193e-35	1.93066	1.44805e-30	down
ADH1A	1.87878e-25	1.7353	5.96362e-21	down
ADH1B	2.18113e-22	2.19359	6.92333e-18	down
ADH7	2.00272e-65	2.7249	6.35705e-61	down
ADI1	3.55716e-14	1.70422	1.12911e-09	down
ADPGK	1.06058e-26	2.11421	3.36648e-22	down
ADRA1A	1.68853e-34	1.70058	5.35974e-30	down
AFAP1L2	5.77558e-52	4.17205	1.83328e-47	down
AFF1	1.51577e-30	2.48922	4.81137e-26	down
AFF2	1.67142e-59	2.70181	5.30542e-55	down
AFF3	2.18755e-70	3.55675	6.94371e-66	down
AFF4	7.75198e-31	1.72083	2.46063e-26	down
AGAP1	1.20507e-20	1.35342	3.82514e-16	down
AGBL2	3.96978e-39	2.31991	1.26009e-34	down
AGBL5	3.1076e-34	1.43431	9.86414e-30	down
AGFG2	9.58931e-13	1.42353	3.04384e-08	down
AGGF1	7.8245e-27	1.56631	2.48365e-22	down
AGK	3.68289e-47	3.63304	1.16902e-42	down
AGL	1.80799e-17	1.06389	5.73891e-13	down
AGPAT1	1.61015e-12	2.19524	5.11093e-08	down
AGPAT3	9.8707e-30	2.00562	3.13316e-25	down
AGPS	9.47785e-20	1.12977	3.00846e-15	down
AGTPBP1	4.8473e-26	2.15783	1.53863e-21	down
AHSA2P	7.71866e-18	2.34372	2.45006e-13	down
AIFM1	4.84614e-16	1.57541	1.53826e-11	down
AIFM2	2.04618e-38	3.81771	6.49498e-34	down
AIFM3	5.85565e-16	1.43815	1.8587e-11	down
AK1	1.40639e-06	1.86193	0.0446417	down
AK5	1.74174e-50	3.50016	5.52864e-46	down
AK9	9.54408e-64	2.38483	3.02948e-59	down
AKAP11	3.79419e-39	2.72863	1.20435e-34	down
AKAP14	6.67221e-14	1.21836	2.11789e-09	down
AKAP17A	8.62882e-17	1.55339	2.73896e-12	down
AKAP6	3.60118e-39	2.10355	1.14309e-34	down
AKIP1	4.57726e-24	2.40227	1.45291e-19	down
AKIRIN2	6.68219e-22	2.09997	2.12106e-17	down
AKNA	1.71576e-42	2.40069	5.44618e-38	down
AKR1B1	1.10364e-11	1.57707	3.50318e-07	down
AKT1	3.71412e-09	1.88502	0.000117894	down
AKT2	6.87963e-19	1.64556	2.18373e-14	down
AKTIP	1.12694e-47	4.16074	3.57712e-43	down
ALAS1	3.49338e-51	4.05671	1.10887e-46	down
ALDH18A1	6.15472e-09	1.24373	0.000195363	down
ALDH1A2	1.09272e-31	3.07151	3.46851e-27	down
ALDH7A1	9.37945e-17	1.79029	2.97723e-12	down
ALDH9A1	4.47781e-11	1.19645	1.42135e-06	down
ALKAL1	2.28269e-29	1.39188	7.24572e-25	down
ALKBH2	8.4084e-08	1.1268	0.00266899	down
ALKBH5	3.03105e-31	2.43531	9.62116e-27	down
ALOX15	6.52826e-52	4.04888	2.0722e-47	down
ALOX15B	2.37798e-26	2.51982	7.5482e-22	down
ALOX5AP	4.06708e-36	3.28266	1.29097e-31	down
ALOXE3	8.00107e-35	2.17848	2.5397e-30	down
AMBRA1	3.93506e-35	2.20852	1.24907e-30	down
AMER1	9.17095e-16	1.31107	2.91104e-11	down
AMFR	2.79535e-25	1.50985	8.87299e-21	down
AMOTL1	3.37131e-17	1.61314	1.07012e-12	down
AMPD3	2.91697e-39	3.63845	9.25905e-35	down
AMZ1	1.48237e-44	2.67746	4.70535e-40	down
AMZ2	2.09211e-21	2.0908	6.64079e-17	down
ANAPC11	3.27616e-10	1.12982	1.03992e-05	down
ANK3	7.64139e-54	1.82641	2.42553e-49	down
ANKRD13A	3.10498e-10	1.20036	9.85581e-06	down
ANKRD27	3.31764e-12	1.30984	1.05309e-07	down
ANKRD40CL	8.28145e-11	2.8301	2.6287e-06	down
ANKRD45	1.48292e-28	2.00251	4.70707e-24	down
ANKRD46	1.08808e-16	1.63188	3.45379e-12	down
ANKRD49	2.26873e-12	1.65555	7.20142e-08	down
ANKS1A	2.12042e-19	1.41966	6.73063e-15	down
ANKS4B	5.21061e-28	1.78045	1.65395e-23	down
ANLN	2.30262e-26	2.2042	7.30897e-22	down
ANO1	8.61195e-49	1.72607	2.73361e-44	down
ANO10	9.85532e-13	1.28048	3.12827e-08	down
ANO4	2.24966e-32	2.03628	7.14087e-28	down
ANO6	1.27024e-49	2.8544	4.032e-45	down
ANXA2	1.40626e-09	1.67351	4.46374e-05	down
ANXA4	4.60048e-41	3.74492	1.46028e-36	down
ANXA9	2.56793e-11	1.72726	8.15113e-07	down
AP1M1	3.50468e-32	2.83308	1.11245e-27	down
AP1M2	2.37589e-16	1.75356	7.54156e-12	down
AP2A2	2.21823e-10	1.01708	7.04111e-06	down
AP3B2	6.9041e-40	2.7081	2.1915e-35	down
AP3D1	2.79629e-14	1.27743	8.87598e-10	down
AP5S1	1.39783e-18	1.7973	4.43701e-14	down
APBA2	1.28482e-48	2.71268	4.07828e-44	down
APBB2	1.13763e-13	1.18816	3.61107e-09	down
APC	1.81188e-15	1.03514	5.75126e-11	down
APC2	1.17874e-36	1.51756	3.74155e-32	down
APH1A	6.7555e-15	1.78387	2.14433e-10	down
APLF	2.85324e-40	2.84108	9.05674e-36	down
APOC4	3.17781e-46	3.93434	1.0087e-41	down
APPL1	1.23844e-16	1.33972	3.93104e-12	down
APPL2	7.57067e-29	2.33001	2.40308e-24	down
ARAF	2.35574e-09	1.12696	7.47758e-05	down
ARAP2	1.79384e-27	2.41315	5.69399e-23	down
ARFGEF3	2.24189e-32	1.80561	7.1162e-28	down
ARFIP1	1.49543e-41	2.87965	4.74678e-37	down
ARG2	1.46976e-45	4.1018	4.66532e-41	down
ARHGAP10	6.60563e-38	2.82191	2.09676e-33	down
ARHGAP12	2.83564e-41	2.87363	9.00088e-37	down
ARHGAP17	1.2947e-29	2.05114	4.10964e-25	down
ARHGAP18	1.70626e-52	4.71206	5.41602e-48	down
ARHGAP20	8.54999e-29	2.39254	2.71394e-24	down
ARHGAP26	4.7753e-44	2.76539	1.51578e-39	down
ARHGAP28	5.01437e-22	1.96689	1.59166e-17	down
ARHGAP32	2.46554e-09	1.24175	7.82613e-05	down
ARHGAP35	9.47376e-14	1.14836	3.00716e-09	down
ARHGEF12	4.34988e-27	1.85786	1.38074e-22	down
ARHGEF16	1.43421e-53	3.3324	4.55248e-49	down
ARHGEF28	2.08645e-49	3.05201	6.62282e-45	down
ARHGEF3	2.5344e-30	2.17272	8.04468e-26	down
ARHGEF7	5.30393e-37	2.36997	1.68357e-32	down
ARHGEF9	3.02521e-12	1.21341	9.60262e-08	down
ARID1A	1.2673e-12	1.1832	4.02267e-08	down
ARID4B	1.81041e-11	1.30667	5.74659e-07	down
ARL13B	1.37458e-52	3.01054	4.3632e-48	down
ARL14EPL	1.70867e-12	1.84351	5.42368e-08	down
ARL2BP	1.34128e-39	3.16027	4.25748e-35	down
ARL4A	4.26196e-15	1.89803	1.35283e-10	down
ARL6	3.5477e-16	2.06633	1.12611e-11	down
ARL6IP5	4.76879e-17	2.10735	1.51371e-12	down
ARMC1	5.03629e-18	1.43175	1.59862e-13	down
ARMC2	1.89978e-74	4.37119	6.03029e-70	down
ARMC7	4.19855e-22	1.73621	1.3327e-17	down
ARMC8	6.39428e-15	1.52964	2.02967e-10	down
ARMC9	9.27875e-12	1.10121	2.94526e-07	down
ARSE	5.30162e-28	1.02993	1.68284e-23	down
ARSH	5.34791e-18	2.22249	1.69753e-13	down
ARSK	1.13917e-14	1.85711	3.61594e-10	down
ART3	2.81047e-34	1.44164	8.921e-30	down
ARV1	1.0169e-09	1.45	3.22783e-05	down
ASAH1	3.07817e-16	1.66637	9.77071e-12	down
ASAP2	5.7377e-51	3.79366	1.82126e-46	down
ASB8	3.08374e-31	2.79477	9.78842e-27	down
ASCC3	3.77174e-27	2.45975	1.19722e-22	down
ASCL1	8.76369e-09	3.6145	0.000278177	down
ASF1A	1.98843e-39	3.09719	6.31168e-35	down
ASF1B	4.12719e-15	1.45087	1.31005e-10	down
ASMT	4.38686e-15	1.817	1.39248e-10	down
ASS1	7.15668e-31	2.27701	2.27167e-26	down
ASTL	1.33259e-42	3.2454	4.22992e-38	down
ASTN2	1.77857e-33	2.18512	5.64554e-29	down
ASXL1	4.52241e-12	1.05756	1.4355e-07	down
ASXL3	4.94172e-45	2.13896	1.5686e-40	down
ATF2	5.97229e-34	2.71	1.89572e-29	down
ATF5	1.51818e-35	1.63667	4.819e-31	down
ATF6	3.56973e-14	1.64812	1.1331e-09	down
ATF7	7.12949e-24	1.89253	2.26304e-19	down
ATF7IP2	1.20289e-37	3.05581	3.8182e-33	down
ATG2B	1.21758e-26	1.80561	3.86486e-22	down
ATG4B	4.30063e-17	1.89237	1.36511e-12	down
ATN1	4.97912e-16	1.2565	1.58047e-11	down
ATP10B	2.26243e-78	2.37133	7.18141e-74	down
ATP11AUN	8.29789e-09	1.83212	0.000263392	down
ATP11B	2.76537e-23	1.96903	8.77783e-19	down
ATP13A5	6.50897e-42	2.53646	2.06608e-37	down
ATP1A3	6.03363e-31	2.23495	1.9152e-26	down
ATP1B1	1.75669e-17	2.12184	5.57609e-13	down
ATP2A2	1.07712e-27	1.8441	3.41901e-23	down
ATP2A3	2.08736e-47	2.31691	6.62569e-43	down
ATP2B1	3.30165e-17	1.23522	1.04801e-12	down
ATP2C1	3.89269e-39	1.99964	1.23562e-34	down
ATP2C2	1.26073e-34	2.94998	4.0018e-30	down
ATP6V0A4	5.88812e-29	2.67649	1.86901e-24	down
ATP6V1C1	2.97279e-09	1.77536	9.43623e-05	down
ATP6V1C2	6.67652e-43	2.57377	2.11926e-38	down
ATP6V1G1	9.36148e-17	1.12761	2.97152e-12	down
ATP8A1	7.36198e-20	2.10089	2.33684e-15	down
ATP8A2	1.35312e-34	3.22583	4.29507e-30	down
ATP8B4	2.15204e-47	2.59606	6.831e-43	down
ATP9A	1.19842e-39	1.6349	3.80404e-35	down
ATPAF2	1.42506e-12	1.44282	4.52343e-08	down
ATRNL1	1.94625e-28	1.63774	6.17778e-24	down
ATXN1	1.61919e-46	1.98376	5.13964e-42	down
ATXN2	7.40652e-08	1.02039	0.00235098	down
ATXN2L	1.01366e-23	1.72637	3.21755e-19	down
AURKA	9.53296e-32	3.12541	3.02595e-27	down
AVEN	1.04933e-56	3.87343	3.33077e-52	down
AVL9	3.5113e-59	3.67043	1.11456e-54	down
AXIN2	7.37838e-12	1.09367	2.34205e-07	down
AZIN2	1.03194e-16	1.87951	3.27557e-12	down
AZU1	9.79252e-19	1.39567	3.10834e-14	down
B3GALNT1	5.42013e-35	4.08522	1.72046e-30	down
B3GALT4	4.21493e-07	1.25919	0.013379	down
B3GAT2	8.29236e-54	1.51182	2.63216e-49	down
B3GLCT	1.71429e-42	1.69032	5.44148e-38	down
B3GNT2	1.11501e-47	4.72264	3.53926e-43	down
B3GNT3	2.88129e-34	3.35101	9.14579e-30	down
B4GALT1	9.7019e-18	1.57387	3.07958e-13	down
B4GALT6	1.96535e-31	2.70711	6.23841e-27	down
B9D1	5.39174e-15	3.06863	1.71145e-10	down
BACE1	5.86018e-10	1.36255	1.86014e-05	down
BACH1	2.21414e-52	3.94222	7.02813e-48	down
BACH2	3.93729e-52	2.71925	1.24978e-47	down
BAD	1.98081e-11	1.61903	6.28748e-07	down
BAG6	2.60773e-14	1.31566	8.27745e-10	down
BAIAP2	1.87802e-20	1.90301	5.96122e-16	down
BAIAP2L1	2.4385e-33	2.26255	7.74028e-29	down
BAMBI	1.0756e-06	1.09853	0.0341419	down
BARD1	2.3448e-15	1.35106	7.44287e-11	down
BARX1	4.39129e-12	2.25434	1.39388e-07	down
BARX2	6.39178e-33	2.48608	2.02888e-28	down
BAZ2A	1.67066e-11	1.20679	5.30301e-07	down
BBS1	2.36007e-22	1.13377	7.49133e-18	down
BBS10	1.31614e-07	1.20338	0.00417768	down
BBS12	7.062e-18	1.13378	2.24162e-13	down
BBS2	6.5244e-37	3.22543	2.07098e-32	down
BBS4	1.04133e-33	2.88393	3.30539e-29	down
BBS5	4.07792e-18	1.72677	1.29441e-13	down
BBS7	3.82752e-26	1.66178	1.21493e-21	down
BBS9	1.56735e-38	2.8782	4.97509e-34	down
BCAR1	1.6669e-18	1.68126	5.29106e-14	down
BCAR3	3.494e-34	1.49617	1.10906e-29	down
BCAS1	1.46413e-34	2.65623	4.64745e-30	down
BCAS4	4.1868e-07	1.23649	0.0132897	down
BCAT2	1.26797e-26	2.03188	4.0248e-22	down
BCKDHB	1.97423e-29	2.96398	6.26661e-25	down
BCL11A	1.34454e-07	1.71246	0.00426782	down
BCL2L1	2.48339e-14	1.17203	7.88277e-10	down
BCL2L10	3.48241e-28	4.34684	1.10539e-23	down
BCL3	2.64819e-08	1.70788	0.000840587	down
BCL6	4.11449e-27	1.82115	1.30602e-22	down
BCL6B	3.8502e-21	2.7408	1.22213e-16	down
BCL9	1.69435e-23	2.05844	5.3782e-19	down
BCO1	2.40261e-28	2.62208	7.62636e-24	down
BCORL1	2.95665e-19	1.83463	9.38501e-15	down
BDH1	1.39e-23	2.9824	4.41213e-19	down
BDH2	1.71809e-32	3.37615	5.45356e-28	down
BDNF	9.50504e-50	1.79759	3.01709e-45	down
BEND7	2.24497e-68	2.50892	7.12599e-64	down
BHLHB9	9.90517e-39	2.79483	3.1441e-34	down
BICC1	9.69154e-36	3.30694	3.07629e-31	down
BICRA	3.05183e-50	1.32125	9.68713e-46	down
BIN1	1.96509e-28	2.44179	6.23759e-24	down
BIN2	3.37166e-22	1.88212	1.07023e-17	down
BIN3	1.42298e-14	1.33278	4.51682e-10	down
BIRC2	3.31395e-14	1.42553	1.05191e-09	down
BLCAP	2.16274e-27	2.52606	6.86496e-23	down
BLNK	4.67807e-53	1.88032	1.48491e-48	down
BLZF1	7.21681e-11	1.19619	2.29076e-06	down
BMP15	3.25513e-50	5.14039	1.03324e-45	down
BMP2K	4.82149e-22	1.14364	1.53044e-17	down
BMP5	1.8606e-23	2.10096	5.90592e-19	down
BMP6	5.18898e-33	2.58611	1.64709e-28	down
BMPR1A	9.02497e-17	1.57123	2.86471e-12	down
BMPR1B	1.33781e-74	3.5661	4.24649e-70	down
BNIP3L	1.56076e-29	2.88222	4.95416e-25	down
BOD1	5.90592e-24	3.01616	1.87466e-19	down
BORCS5	3.88793e-25	2.32798	1.23411e-20	down
BPGM	1.36793e-10	1.39258	4.34209e-06	down
BRAF	4.42991e-42	2.14456	1.40614e-37	down
BRCA1	4.26677e-19	1.67368	1.35436e-14	down
BRCA2	8.53118e-22	1.32498	2.70797e-17	down
BRD1	1.18653e-22	1.60653	3.76628e-18	down
BRD3OS	3.36814e-23	2.37469	1.06912e-18	down
BRD4	4.19864e-10	1.02343	1.33273e-05	down
BRD7	5.06138e-20	2.18539	1.60658e-15	down
BRI3	9.31136e-22	2.0547	2.95561e-17	down
BRINP1	6.24281e-46	2.17253	1.98159e-41	down
BRWD1	7.16061e-15	1.01966	2.27292e-10	down
BTBD10	3.77852e-16	1.54706	1.19938e-11	down
BTBD11	1.14115e-26	3.09031	3.62224e-22	down
BTBD19	1.09083e-06	1.20763	0.0346252	down
BTBD2	2.86835e-13	1.50403	9.10471e-09	down
BTG4	1.65897e-42	4.79988	5.26591e-38	down
BUB1B	3.68784e-27	2.914	1.17059e-22	down
C10H20orf197	6.58613e-09	2.47192	0.000209057	down
C10H22orf23	3.42481e-48	1.61298	1.0871e-43	down
C11H12orf40	5.03467e-33	1.95515	1.59811e-28	down
C11H12orf75	2.3355e-15	1.45642	7.41335e-11	down
C12H2orf88	4.86191e-25	1.91065	1.54327e-20	down
C13H2orf15	4.76597e-17	1.21102	1.51281e-12	down
C13H2orf40	3.44801e-08	2.17519	0.00109447	down
C13H2orf74	7.77705e-30	3.53396	2.46859e-25	down
C14H11orf53	6.9942e-48	2.12976	2.2201e-43	down
C14H11orf68	1.26016e-07	1.57015	0.004	down
C14H11orf74	1.90176e-20	2.29722	6.03656e-16	down
C14H11orf80	3.60404e-21	1.66641	1.144e-16	down
C15H9orf135	1.06975e-64	2.57677	3.39561e-60	down
C15H9orf153	1.90201e-72	5.0605	6.03738e-68	down
C16H17orf100	2.7624e-10	1.33424	8.76842e-06	down
C16H17orf49	7.33206e-23	1.74034	2.32734e-18	down
C17H13orf42	9.80917e-07	2.00328	0.0311363	down
C18H18orf54	1.26689e-18	1.31587	4.02135e-14	down
C19H19orf57	6.01948e-10	1.33488	1.9107e-05	down
C19H19orf67	4.06629e-34	4.08815	1.29072e-29	down
C1H1orf116	8.11253e-07	1.83958	0.0257508	down
C1H1orf146	1.13136e-40	3.85785	3.59115e-36	down
C1H1orf174	3.14636e-19	1.44502	9.98717e-15	down
C1H1orf21	4.59649e-35	1.92512	1.45902e-30	down
C1H1orf210	1.0876e-19	4.65972	3.45227e-15	down
C1H1orf50	2.48671e-16	1.5405	7.89331e-12	down
C1H1orf74	1.60506e-18	1.79314	5.0948e-14	down
C1QL4	6.21339e-11	1.22359	1.97225e-06	down
C1QTNF1	6.79671e-54	1.92097	2.15741e-49	down
C1QTNF6	2.3584e-35	3.5941	7.48604e-31	down
C20H16orf46	1.26147e-40	2.90429	4.00415e-36	down
C20H16orf71	2.79557e-19	1.14648	8.87369e-15	down
C20H16orf96	1.20633e-30	1.81838	3.82914e-26	down
C2CD5	2.66901e-37	2.3928	8.47198e-33	down
C2CD6	5.4437e-31	2.92071	1.72794e-26	down
C2H3orf86	1.21655e-10	2.29813	3.86156e-06	down
C3H21orf58	6.70543e-23	1.11325	2.12844e-18	down
C3H21orf91	6.90822e-14	1.24499	2.19281e-09	down
C3H7orf25	1.07748e-17	2.32019	3.42015e-13	down
C4H6orf136	7.72792e-33	2.75066	2.453e-28	down
C4H6orf226	4.47856e-25	1.91064	1.42158e-20	down
C5AR1	4.07911e-47	4.02339	1.29479e-42	down
C5AR2	3.54841e-50	2.57936	1.12634e-45	down
C5H4orf19	1.62977e-85	3.11646	5.17322e-81	down
C5H4orf27	1.022e-10	1.04855	3.24404e-06	down
C6H5orf49	7.2024e-08	2.0978	0.00228618	down
C6H5orf51	3.11315e-19	1.72779	9.88176e-15	down
C7H14orf178	3.18864e-56	3.05003	1.01214e-51	down
C7H15orf61	4.09956e-08	1.49624	0.00130128	down
C8B	2.69764e-13	1.91513	8.56284e-09	down
C9H10orf82	1.24327e-08	2.59345	0.000394638	down
C9H10orf90	3.24063e-61	4.02042	1.02864e-56	down
CA10	5.85922e-29	1.54456	1.85983e-24	down
CA12	2.06074e-43	3.52651	6.5412e-39	down
CABLES2	2.95418e-38	1.68346	9.37714e-34	down
CABYR	9.08579e-22	1.85075	2.88401e-17	down
CACNA1A	7.01097e-46	1.56745	2.22542e-41	down
CACNA1C	1.9496e-86	1.97903	6.18842e-82	down
CACNA1D	3.66583e-53	2.36582	1.16361e-48	down
CACNA1E	4.32247e-60	2.55119	1.37204e-55	down
CACNA1I	2.96072e-35	1.46933	9.39793e-31	down
CACNB1	1.58579e-16	1.66646	5.03361e-12	down
CACNB2	1.60366e-72	1.63853	5.09033e-68	down
CACNG5	1.25319e-40	3.39448	3.97787e-36	down
CACNG7	5.23404e-39	3.14676	1.66139e-34	down
CACUL1	4.90413e-24	1.63903	1.55667e-19	down
CALCOCO2	8.46823e-17	1.10987	2.68799e-12	down
CALM1	5.88866e-17	1.58151	1.86918e-12	down
CAMK1	2.7397e-40	2.01331	8.69637e-36	down
CAMK1D	4.89971e-50	2.38386	1.55526e-45	down
CAMK2G	2.33202e-28	1.87257	7.40231e-24	down
CAMTA2	6.59226e-31	1.99009	2.09252e-26	down
CAND2	1.78806e-19	1.66615	5.67565e-15	down
CAPN1	1.77604e-16	1.53814	5.63752e-12	down
CAPN12	1.24398e-12	1.14557	3.94864e-08	down
CAPN13	7.08957e-34	2.81682	2.25037e-29	down
CAPN14	1.21235e-32	2.52278	3.84823e-28	down
CAPN7	6.04904e-09	1.59861	0.000192009	down
CAPRIN2	3.27723e-19	1.54794	1.04026e-14	down
CAPZB	7.76119e-12	1.49901	2.46356e-07	down
CARS	5.53357e-20	1.55322	1.75647e-15	down
CASP2	4.00178e-14	1.53402	1.27025e-09	down
CASP8	1.22232e-07	1.24557	0.00387987	down
CAST	1.01278e-18	1.89713	3.21477e-14	down
CASTOR1	4.24598e-12	3.01872	1.34776e-07	down
CAT	2.10244e-12	1.48734	6.67357e-08	down
CATSPERD	2.77353e-27	1.41945	8.80373e-23	down
CATSPERG	2.11714e-37	1.47778	6.72024e-33	down
CAV1	1.95477e-19	3.29412	6.20483e-15	down
CAV2	4.85431e-08	1.47566	0.00154085	down
CAVIN2	4.19207e-10	1.12076	1.33065e-05	down
CAVIN3	3.09564e-07	2.3851	0.00982617	down
CBFA2T3	8.28794e-43	1.87702	2.63076e-38	down
CBLB	1.01054e-45	2.3256	3.20765e-41	down
CBLN2	3.86256e-29	2.82138	1.22605e-24	down
CBR4	1.01636e-40	3.12305	3.22612e-36	down
CBX8	1.3164e-10	1.36313	4.1785e-06	down
CCBE1	2.08392e-21	2.31565	6.61478e-17	down
CCDC102A	2.57599e-46	2.41304	8.17671e-42	down
CCDC106	1.01796e-32	2.49753	3.23122e-28	down
CCDC110	3.0325e-16	2.14289	9.62575e-12	down
CCDC120	1.09283e-31	2.60033	3.46887e-27	down
CCDC121	1.22641e-35	3.06127	3.89288e-31	down
CCDC13	8.7079e-19	1.27099	2.76406e-14	down
CCDC138	1.10506e-14	1.53394	3.50769e-10	down
CCDC141	8.71094e-41	2.53375	2.76503e-36	down
CCDC146	2.08105e-37	2.52823	6.60568e-33	down
CCDC148	5.88523e-40	3.06228	1.86809e-35	down
CCDC15	1.21806e-30	2.56488	3.86635e-26	down
CCDC150	9.79554e-30	2.26408	3.1093e-25	down
CCDC151	1.79078e-26	1.60143	5.68428e-22	down
CCDC172	6.18851e-32	2.68885	1.96436e-27	down
CCDC178	2.312e-40	2.84279	7.33876e-36	down
CCDC180	9.15878e-40	1.89629	2.90718e-35	down
CCDC194	7.9358e-29	2.85958	2.51898e-24	down
CCDC25	3.24971e-24	2.10391	1.03152e-19	down
CCDC27	1.05096e-35	2.40863	3.33595e-31	down
CCDC28B	2.04023e-15	1.47565	6.47611e-11	down
CCDC43	5.57433e-15	1.287	1.76941e-10	down
CCDC50	6.12157e-59	3.16147	1.94311e-54	down
CCDC6	2.49331e-47	2.9463	7.91427e-43	down
CCDC61	3.96574e-31	2.29193	1.25881e-26	down
CCDC63	8.42545e-23	1.74552	2.67441e-18	down
CCDC69	1.0171e-28	1.89973	3.22847e-24	down
CCDC73	1.38369e-38	2.24342	4.39212e-34	down
CCDC77	8.22222e-13	1.1831	2.6099e-08	down
CCDC82	6.8595e-16	1.91725	2.17734e-11	down
CCDC83	2.14571e-10	1.13026	6.81091e-06	down
CCDC85A	4.14151e-95	1.97487	1.3146e-90	down
CCDC87	6.14469e-14	2.89265	1.95045e-09	down
CCDC88C	7.01098e-23	1.33649	2.22542e-18	down
CCDC91	7.34615e-28	2.36644	2.33181e-23	down
CCDC92	1.26758e-16	2.49555	4.02354e-12	down
CCDC93	8.73303e-41	2.89808	2.77204e-36	down
CCDC97	1.11871e-17	1.62784	3.551e-13	down
CCKAR	4.81985e-12	3.02391	1.52992e-07	down
CCL25	4.35602e-39	2.74438	1.38269e-34	down
CCL26	4.60285e-08	1.29181	0.00146104	down
CCM2L	6.56166e-29	1.8581	2.0828e-24	down
CCN1	4.06336e-16	2.48795	1.28979e-11	down
CCN6	9.66611e-45	2.61877	3.06822e-40	down
CCNB3	6.58507e-15	1.88147	2.09023e-10	down
CCND1	2.30783e-08	1.11998	0.000732552	down
CCNI	3.00633e-31	3.28753	9.5427e-27	down
CCNI2	1.35913e-31	2.99355	4.31415e-27	down
CCNJ	8.96564e-55	4.51116	2.84587e-50	down
CCNK	1.8145e-21	1.46199	5.75959e-17	down
CCNO	7.51426e-42	4.14457	2.38517e-37	down
CCNY	7.11684e-78	2.45847	2.25903e-73	down
CCR7	1.92527e-22	3.29717	6.11118e-18	down
CCR8	7.5552e-08	2.72706	0.00239817	down
CCSER2	1.30201e-28	2.21696	4.13285e-24	down
CCT6B	1.08146e-22	1.45953	3.43277e-18	down
CCZ1	2.80184e-32	2.19055	8.89359e-28	down
CD177	2.23714e-25	1.96749	7.10113e-21	down
CD226	9.67973e-47	3.31832	3.07254e-42	down
CD247	4.78121e-37	3.79932	1.51765e-32	down
CD28	4.69357e-133	2.18311	1.48983e-128	down
CD2AP	3.50876e-18	1.39734	1.11375e-13	down
CD36	8.36413e-32	3.52209	2.65494e-27	down
CD37	7.76465e-19	1.10712	2.46466e-14	down
CD38	5.26773e-60	3.58801	1.67208e-55	down
CD5	9.32773e-29	2.49895	2.96081e-24	down
CD55	4.90656e-18	2.12332	1.55744e-13	down
CD59	4.29923e-19	1.93435	1.36466e-14	down
CD82	8.86743e-17	1.03458	2.8147e-12	down
CD86	1.56231e-30	2.44469	4.95907e-26	down
CD99	5.47117e-30	1.93945	1.73666e-25	down
CDA	2.51252e-10	1.57614	7.97523e-06	down
CDC20B	4.20598e-23	2.90266	1.33506e-18	down
CDC25C	4.32293e-09	1.07786	0.000137218	down
CDC27	4.2591e-12	1.57248	1.35192e-07	down
CDC42BPA	1.25326e-33	1.21437	3.97808e-29	down
CDC42BPB	3.09522e-43	2.52396	9.82484e-39	down
CDC42EP2	1.23415e-16	1.45995	3.91745e-12	down
CDC42EP3	2.91891e-32	1.70797	9.26521e-28	down
CDC42EP5	7.80799e-48	1.95811	2.47841e-43	down
CDC42SE2	3.48635e-16	1.34504	1.10664e-11	down
CDC5L	4.8692e-12	1.12624	1.54558e-07	down
CDC7	2.44963e-15	1.28954	7.77561e-11	down
CDCA7L	2.16515e-21	2.04051	6.87262e-17	down
CDCP1	1.32839e-18	1.24294	4.21657e-14	down
CDH1	3.76262e-14	1.5681	1.19433e-09	down
CDH10	7.58916e-119	3.01636	2.40895e-114	down
CDH11	1.51611e-38	1.58168	4.81242e-34	down
CDH13	3.14869e-68	3.18787	9.99457e-64	down
CDH17	1.48112e-06	1.74032	0.0470136	down
CDH18	1.94048e-39	2.88663	6.15948e-35	down
CDH19	7.9426e-49	2.24717	2.52114e-44	down
CDH2	5.64813e-07	1.40418	0.0179283	down
CDH3	5.88276e-31	2.97564	1.86731e-26	down
CDH5	2.21547e-58	2.46829	7.03234e-54	down
CDH8	1.86585e-44	2.35059	5.92258e-40	down
CDIP1	5.40878e-09	1.23512	0.000171685	down
CDK2	5.64492e-25	1.09744	1.79181e-20	down
CDK2AP2	5.92381e-33	2.72229	1.88034e-28	down
CDK5	5.49633e-18	2.0277	1.74465e-13	down
CDKAL1	1.63012e-29	2.12862	5.17431e-25	down
CDKN1C	7.95347e-12	2.93532	2.52459e-07	down
CDKN2B	1.90814e-21	2.05916	6.05681e-17	down
CDS1	5.28295e-33	1.80874	1.67692e-28	down
CDS2	3.97349e-16	1.39495	1.26126e-11	down
CDX2	5.26567e-19	2.59066	1.67143e-14	down
CELF2	1.3875e-20	1.52097	4.40422e-16	down
CELSR1	1.76393e-20	1.83044	5.59908e-16	down
CEMIP2	4.34434e-32	2.48639	1.37898e-27	down
CENPE	8.72598e-25	1.59246	2.7698e-20	down
CENPO	1.23073e-26	1.39967	3.90659e-22	down
CEP120	4.78796e-43	3.13714	1.5198e-38	down
CEP128	8.81137e-17	1.30329	2.79691e-12	down
CEP135	1.50287e-22	1.07573	4.77041e-18	down
CEP152	5.14026e-14	1.07281	1.63162e-09	down
CEP295	6.16225e-36	2.31181	1.95602e-31	down
CEP63	8.06469e-20	1.6719	2.55989e-15	down
CEP83	5.6718e-38	2.42482	1.80034e-33	down
CEP89	1.6976e-24	2.16933	5.38851e-20	down
CEP97	1.37686e-13	1.33086	4.37041e-09	down
CERKL	1.65771e-18	1.57306	5.26192e-14	down
CERS2	1.33801e-09	1.20338	4.24712e-05	down
CETN1	1.01323e-08	1.19218	0.000321621	down
CETN2	4.46804e-12	1.25557	1.41825e-07	down
CFAP206	7.31814e-41	2.35214	2.32293e-36	down
CFAP221	1.66988e-25	1.60662	5.30053e-21	down
CFAP298	9.69585e-23	1.90316	3.07766e-18	down
CFAP299	1.91438e-118	1.84539	6.07663e-114	down
CFAP36	5.74002e-13	1.81176	1.822e-08	down
CFAP58	2.06486e-43	3.43152	6.55429e-39	down
CFAP77	2.9986e-64	3.45915	9.51814e-60	down
CFD	1.19613e-10	1.69104	3.79675e-06	down
CGGBP1	2.80975e-21	1.51649	8.91871e-17	down
CGNL1	2.58881e-44	2.7079	8.21742e-40	down
CHAC1	1.61194e-11	1.83271	5.11661e-07	down
CHAC2	4.60713e-38	5.07534	1.4624e-33	down
CHAF1A	1.09474e-09	1.24311	3.47493e-05	down
CHAMP1	6.1806e-32	2.25987	1.96185e-27	down
CHCHD6	5.49924e-08	1.25653	0.00174557	down
CHD3	5.94086e-32	2.38832	1.88575e-27	down
CHEK1	2.94543e-45	2.69079	9.34939e-41	down
CHMP2B	1.69074e-17	1.64854	5.36674e-13	down
CHMP3	1.81466e-13	1.69793	5.7601e-09	down
CHMP4C	1.51514e-25	1.43755	4.80935e-21	down
CHN2	2.14343e-72	4.48627	6.80367e-68	down
CHP1	1.23162e-12	1.30746	3.9094e-08	down
CHRDL1	3.64935e-08	1.11174	0.00115838	down
CHRNE	1.02139e-36	2.5733	3.2421e-32	down
CHSY1	2.58479e-22	1.69667	8.20465e-18	down
CIB1	8.36305e-15	1.56343	2.6546e-10	down
CIDEC	2.07124e-46	3.52364	6.57452e-42	down
CIT	2.33541e-23	1.56833	7.41307e-19	down
CITED1	1.71833e-10	3.35922	5.45433e-06	down
CLCC1	1.97668e-13	1.49075	6.27438e-09	down
CLCN3	3.71214e-25	1.91075	1.17831e-20	down
CLCN4	6.48938e-34	2.42937	2.05986e-29	down
CLCN5	5.95683e-24	1.98551	1.89082e-19	down
CLDN10	1.31218e-29	2.86452	4.16512e-25	down
CLDN12	8.85232e-19	1.72882	2.8099e-14	down
CLDND2	1.02887e-14	2.22653	3.26585e-10	down
CLEC10A	1.31056e-56	3.87702	4.15997e-52	down
CLEC11A	1.65999e-08	1.76368	0.000526914	down
CLEC17A	9.80285e-17	1.62402	3.11162e-12	down
CLEC2D	2.34261e-20	2.65941	7.43592e-16	down
CLGN	1.5724e-29	1.46506	4.99111e-25	down
CLIC4	5.96788e-22	1.99027	1.89432e-17	down
CLIC6	1.36498e-32	1.97799	4.33271e-28	down
CLIP1	6.72216e-12	1.04427	2.13375e-07	down
CLIP4	1.24627e-32	3.49324	3.95592e-28	down
CLOCK	4.20992e-23	2.06574	1.33631e-18	down
CLPTM1L	3.5752e-19	1.61827	1.13484e-14	down
CLRN2	7.47005e-11	2.00801	2.37114e-06	down
CLTRN	3.00559e-16	1.27872	9.54034e-12	down
CLUAP1	1.72429e-08	1.09245	0.000547326	down
CLYBL	2.24973e-53	1.56894	7.14109e-49	down
CMAH	8.7651e-59	4.29657	2.78222e-54	down
CMBL	3.01975e-23	2.37562	9.5853e-19	down
CMC4	3.61248e-21	2.63266	1.14667e-16	down
CMTM4	1.01545e-40	2.47102	3.22326e-36	down
CMTM6	3.53812e-26	2.39506	1.12307e-21	down
CNBD1	2.14005e-19	2.44227	6.79294e-15	down
CNDP1	9.79263e-41	2.49564	3.10838e-36	down
CNFN	2.31216e-21	2.22304	7.33925e-17	down
CNGA3	2.64014e-22	2.95388	8.38034e-18	down
CNKSR2	4.89056e-15	1.22041	1.55236e-10	down
CNN3	3.5293e-22	2.59636	1.12027e-17	down
CNNM2	1.84484e-47	3.4236	5.8559e-43	down
CNOT11	1.37307e-28	1.88903	4.35841e-24	down
CNOT3	3.50849e-23	1.76181	1.11366e-18	down
CNOT4	1.91229e-19	1.40636	6.07e-15	down
CNOT6L	1.86173e-43	3.07773	5.90951e-39	down
CNOT7	7.22083e-26	1.93409	2.29204e-21	down
CNOT9	2.86289e-16	1.40937	9.0874e-12	down
CNP	1.54726e-37	2.9444	4.91131e-33	down
CNPPD1	6.71951e-09	1.37285	0.000213291	down
CNRIP1	4.92704e-48	3.76213	1.56394e-43	down
CNTD2	1.83551e-42	2.71121	5.82627e-38	down
CNTLN	1.28948e-22	1.61378	4.09306e-18	down
CNTN1	4.40643e-40	2.08313	1.39869e-35	down
CNTN5	9.64269e-40	2.5098	3.06078e-35	down
CNTN6	9.14439e-59	2.15283	2.90261e-54	down
CNTRL	8.75515e-16	1.13561	2.77906e-11	down
COA1	7.75226e-20	1.88219	2.46072e-15	down
COBLL1	3.42325e-14	2.08891	1.08661e-09	down
COG5	2.30943e-28	2.36791	7.33059e-24	down
COG6	1.67438e-21	2.16114	5.3148e-17	down
COL28A1	5.84834e-83	2.56107	1.85638e-78	down
COL6A6	8.76102e-17	1.84873	2.78092e-12	down
COPRS	9.04245e-14	1.24153	2.87026e-09	down
COPS4	1.73399e-09	1.04594	5.50405e-05	down
COPS7B	5.04885e-34	2.73902	1.60261e-29	down
COPS8	2.60653e-20	1.45417	8.27363e-16	down
COQ10B	3.13686e-18	1.93202	9.95701e-14	down
CORO2A	1.71707e-29	2.35655	5.45031e-25	down
COX20	6.61866e-11	1.09483	2.10089e-06	down
COX7A2L	2.00569e-24	1.26939	6.36646e-20	down
CPA1	1.46225e-11	3.00096	4.64146e-07	down
CPA6	2.6825e-108	2.05201	8.51478e-104	down
CPB2	5.87521e-191	1.72231	1.86491e-186	down
CPEB1	3.56874e-33	2.45379	1.13279e-28	down
CPEB4	1.15597e-11	1.48062	3.66927e-07	down
CPLX4	1.46659e-30	2.88338	4.65526e-26	down
CPN1	1.18877e-38	2.10397	3.77341e-34	down
CPN2	9.62536e-07	2.03951	0.0305528	down
CPNE2	1.8365e-63	3.44188	5.82942e-59	down
CPNE4	1.087e-38	2.54189	3.45035e-34	down
CPNE7	6.807e-44	1.73565	2.16068e-39	down
CPNE8	5.20456e-29	2.08765	1.65203e-24	down
CPNE9	3.17085e-32	1.561	1.00649e-27	down
CPPED1	2.31519e-13	1.30131	7.34886e-09	down
CPSF2	4.11064e-14	1.37245	1.3048e-09	down
CPSF4L	1.22687e-17	1.22976	3.89433e-13	down
CPT1C	7.50865e-46	1.88771	2.3834e-41	down
CRACR2B	1.7435e-17	2.66643	5.53423e-13	down
CRADD	5.8461e-24	2.14034	1.85567e-19	down
CREB3L1	2.84447e-21	2.57543	9.02891e-17	down
CREB3L2	1.07644e-46	2.88628	3.41684e-42	down
CREB3L3	1.11721e-19	1.12979	3.54626e-15	down
CREB5	7.54279e-70	2.76946	2.39423e-65	down
CREG1	1.73474e-16	1.81204	5.5064e-12	down
CRISPLD2	4.4414e-13	1.39498	1.40979e-08	down
CRLS1	7.02314e-13	1.61236	2.22929e-08	down
CRPPA	1.89486e-39	2.82786	6.01466e-35	down
CRTAM	6.75812e-25	2.74831	2.14516e-20	down
CRTC1	3.08155e-38	2.05185	9.78146e-34	down
CRTC3	7.90607e-23	2.28513	2.50954e-18	down
CRX	9.51345e-09	1.15745	0.000301976	down
CRY1	1.09458e-34	2.73117	3.47443e-30	down
CRYBB2	1.61214e-32	2.0375	5.11726e-28	down
CRYBG2	1.00237e-06	1.18448	0.0318173	down
CRYBG3	1.49266e-20	1.5293	4.73801e-16	down
CRYM	1.04097e-08	1.42437	0.000330426	down
CRYZ	5.45548e-13	1.33953	1.73168e-08	down
CRYZL1	6.87796e-07	1.01543	0.021832	down
CSDC2	1.58578e-37	3.35609	5.03359e-33	down
CSDE1	1.83341e-25	2.12375	5.81961e-21	down
CSF1R	4.84382e-37	2.74274	1.53752e-32	down
CSGALNACT1	9.53214e-41	2.19075	3.02569e-36	down
CSGALNACT2	7.02609e-23	2.81871	2.23022e-18	down
CSH2	1.00928e-08	2.18067	0.000320366	down
CSMD3	4.30801e-31	2.41937	1.36745e-26	down
CSRP1	1.48773e-54	4.58308	4.72236e-50	down
CSRP2	5.75895e-33	3.13873	1.828e-28	down
CST2	1.45873e-09	3.46487	4.63031e-05	down
CST3	7.80182e-16	1.29398	2.47645e-11	down
CSTB	4.60291e-10	1.38672	1.46106e-05	down
CTDSPL	5.38961e-18	1.59911	1.71077e-13	down
CTNNA1	5.33178e-26	2.52567	1.69241e-21	down
CTNNA2	8.5545e-31	2.89457	2.71537e-26	down
CTNNBIP1	2.67553e-15	1.3238	8.49267e-11	down
CTNND1	2.84873e-23	1.93784	9.04243e-19	down
CTRB2	1.11204e-11	2.03417	3.52982e-07	down
CTSC	2.66674e-31	3.44173	8.46478e-27	down
CTTN	3.4346e-19	1.39057	1.09021e-14	down
CUL1	1.01828e-24	2.27703	3.23224e-20	down
CUL5	1.02288e-18	1.29313	3.24684e-14	down
CUX1	1.67038e-22	1.76997	5.3021e-18	down
CWF19L2	4.36807e-20	1.36245	1.38651e-15	down
CXCR2	9.40845e-32	2.16979	2.98643e-27	down
CXHXorf58	3.35857e-10	1.08575	1.06608e-05	down
CYB5A	1.61321e-09	1.42145	5.12066e-05	down
CYB5B	1.03891e-23	1.78055	3.29772e-19	down
CYFIP1	9.04207e-16	1.37155	2.87013e-11	down
CYFIP2	8.95484e-28	2.06846	2.84245e-23	down
CYHR1	4.59983e-15	1.12948	1.46008e-10	down
CYP2C18	6.42407e-30	3.1513	2.03913e-25	down
CYP2C76	4.97586e-18	1.34883	1.57944e-13	down
CYP2C9	9.15779e-27	1.71353	2.90687e-22	down
CYP2C93	1.67728e-43	3.57293	5.32403e-39	down
CYP2E1	7.88507e-08	1.74376	0.00250288	down
CYP2F1	1.86711e-39	2.2739	5.92659e-35	down
CYP2R1	7.72012e-34	3.53235	2.45052e-29	down
CYP39A1	1.03996e-40	3.55392	3.30103e-36	down
CYTIP	5.92601e-54	3.74723	1.88103e-49	down
CZIB	3.76954e-08	1.03282	0.00119653	down
DAAM1	1.6623e-23	1.54067	5.27648e-19	down
DAAM2	2.17036e-28	2.42307	6.88915e-24	down
DAB1	4.47672e-71	2.4578	1.421e-66	down
DAB2IP	2.20255e-19	1.8066	6.99133e-15	down
DACH2	1.76076e-87	2.27154	5.589e-83	down
DAND5	6.64178e-67	3.47672	2.10823e-62	down
DAP	3.16388e-22	2.14225	1.00428e-17	down
DAPK2	3.8516e-56	2.29683	1.22257e-51	down
DAW1	1.81478e-26	2.34948	5.76049e-22	down
DAZL	3.56e-40	4.04183	1.13002e-35	down
DBH	4.35635e-38	3.14952	1.38279e-33	down
DBT	4.78308e-11	1.30013	1.51824e-06	down
DCAF15	6.10191e-19	1.72367	1.93687e-14	down
DCAF16	6.10167e-10	1.17706	1.93679e-05	down
DCAF17	1.46638e-42	3.25743	4.65459e-38	down
DCAF5	1.04066e-44	3.30779	3.30328e-40	down
DCAF6	3.875e-13	1.52138	1.23e-08	down
DCAF7	5.59504e-22	1.66978	1.77598e-17	down
DCDC2	6.50332e-53	4.29633	2.06428e-48	down
DCHS2	2.21231e-12	1.35976	7.02232e-08	down
DCLK1	1.76844e-48	1.69397	5.61337e-44	down
DCLK2	3.42614e-72	4.64189	1.08753e-67	down
DCLRE1A	1.08649e-48	4.76597	3.44872e-44	down
DCLRE1C	8.40475e-20	1.49628	2.66784e-15	down
DCP1B	1.0305e-17	1.51058	3.271e-13	down
DCP2	1.32874e-23	2.08376	4.21767e-19	down
DCT	2.47959e-52	1.90492	7.8707e-48	down
DCTD	9.86432e-19	2.4243	3.13113e-14	down
DCTN4	7.57143e-16	1.3145	2.40332e-11	down
DCTN6	9.94618e-20	1.83483	3.15712e-15	down
DCUN1D1	1.18257e-17	1.99568	3.75371e-13	down
DDAH2	4.43994e-07	1.40998	0.0140933	down
DDB2	6.73836e-22	2.0003	2.13889e-17	down
DDIT4	7.18315e-12	2.07631	2.28007e-07	down
DDR1	5.20728e-13	1.68121	1.65289e-08	down
DDX10	9.95245e-24	2.00865	3.15911e-19	down
DDX11	6.34978e-13	1.20897	2.01555e-08	down
DDX31	1.28879e-22	1.61043	4.09088e-18	down
DDX58	3.55488e-52	3.9401	1.12839e-47	down
DDX59	4.39576e-41	3.35731	1.3953e-36	down
DDX60L	1.29125e-30	2.14116	4.0987e-26	down
DEDD	7.80904e-22	1.71848	2.47875e-17	down
DEK	5.10428e-16	1.20303	1.6202e-11	down
DENND1A	2.35242e-22	1.43331	7.46707e-18	down
DENND1C	5.72573e-27	2.18056	1.81746e-22	down
DENND2A	3.95586e-49	1.60801	1.25567e-44	down
DENND3	1.55612e-51	2.41353	4.93943e-47	down
DEPP1	9.11605e-07	2.63223	0.0289362	down
DES	1.93531e-15	2.74005	6.14306e-11	down
DGKI	2.78485e-78	3.37326	8.83969e-74	down
DGLUCY	1.05106e-28	2.69022	3.33629e-24	down
DGUOK	1.12624e-07	1.11291	0.00357491	down
DHCR7	3.34293e-26	2.56491	1.06111e-21	down
DHTKD1	2.2763e-15	1.66797	7.22543e-11	down
DHX32	3.85579e-43	3.05339	1.2239e-38	down
DHX34	3.80982e-24	1.67337	1.20931e-19	down
DHX58	2.15173e-30	2.25509	6.83001e-26	down
DIAPH2	2.0646e-19	1.65949	6.55346e-15	down
DICER1	2.26989e-18	1.73125	7.20509e-14	down
DIRAS2	2.17744e-51	4.41063	6.91162e-47	down
DIRAS3	2.73217e-21	3.54343	8.67246e-17	down
DLG1	1.93178e-32	2.37837	6.13184e-28	down
DLG2	1.18472e-35	1.7733	3.76053e-31	down
DLG3	1.94149e-28	2.42945	6.16266e-24	down
DLG5	8.05747e-29	1.50219	2.5576e-24	down
DLGAP1	4.30451e-28	1.74798	1.36634e-23	down
DLGAP4	1.12165e-44	2.70782	3.56033e-40	down
DLK2	4.66298e-23	3.7205	1.48012e-18	down
DLST	9.70612e-39	3.05324	3.08092e-34	down
DMD	1.14548e-41	2.98022	3.63598e-37	down
DMKN	2.13774e-26	2.62109	6.7856e-22	down
DMPK	8.66244e-27	2.39328	2.74963e-22	down
DMRT2	1.34759e-09	1.69245	4.27753e-05	down
DMRT3	4.99739e-28	1.68162	1.58627e-23	down
DMRTC2	5.99355e-24	2.87623	1.90247e-19	down
DNAAF1	3.77282e-24	1.69641	1.19757e-19	down
DNAAF3	4.15283e-24	2.6872	1.31819e-19	down
DNAH11	2.70853e-20	1.3233	8.59742e-16	down
DNAH12	1.02461e-27	2.08433	3.25233e-23	down
DNAH17	2.25887e-51	2.53369	7.17009e-47	down
DNAH7	1.00906e-24	1.73316	3.20296e-20	down
DNAJA4	3.33623e-27	2.71875	1.05899e-22	down
DNAJB14	1.52765e-11	1.06766	4.84908e-07	down
DNAJB4	4.31529e-12	1.4401	1.36976e-07	down
DNAJB5	1.0486e-40	3.60891	3.32846e-36	down
DNAJC10	2.88519e-22	1.33589	9.15819e-18	down
DNAJC13	1.17075e-20	1.79402	3.71621e-16	down
DNAJC22	1.46779e-07	1.5567	0.00465905	down
DNAJC27	3.7736e-21	1.44638	1.19782e-16	down
DNAJC4	8.02079e-13	2.3647	2.54596e-08	down
DNAL1	1.76492e-13	1.01706	5.60222e-09	down
DNAL4	1.91941e-16	1.8525	6.09258e-12	down
DNER	3.9914e-60	2.88052	1.26695e-55	down
DNHD1	3.81191e-37	1.17236	1.20998e-32	down
DNM3	4.656e-29	3.14829	1.47791e-24	down
DNMBP	2.24143e-11	1.06773	7.11474e-07	down
DNMT1	1.71719e-33	3.12466	5.45071e-29	down
DNMT3A	1.71654e-55	2.9183	5.44864e-51	down
DNMT3B	4.89987e-21	2.06284	1.55532e-16	down
DNTT	3.09331e-08	2.13797	0.000981877	down
DOCK1	1.14772e-27	2.24219	3.64308e-23	down
DOCK4	1.74103e-19	1.86684	5.52639e-15	down
DOCK9	1.69808e-22	1.5101	5.39006e-18	down
DOK5	7.34548e-34	3.27004	2.3316e-29	down
DOK6	6.75126e-49	1.98572	2.14298e-44	down
DOP1A	2.95863e-28	2.75384	9.39129e-24	down
DPF1	4.16443e-21	3.04922	1.32187e-16	down
DPF2	1.11606e-33	2.06982	3.5426e-29	down
DPP10	2.24651e-74	2.74921	7.13086e-70	down
DPP3	8.78067e-21	2.03668	2.78716e-16	down
DPP6	3.92545e-47	3.08744	1.24602e-42	down
DPY19L3	1.36232e-35	1.70082	4.32429e-31	down
DPYSL2	7.1407e-33	2.15902	2.2666e-28	down
DRC1	2.38892e-29	1.91199	7.5829e-25	down
DRC7	5.36367e-19	2.19203	1.70254e-14	down
DROSHA	9.35859e-20	1.58862	2.9706e-15	down
DSCAML1	1.26806e-28	1.95457	4.02507e-24	down
DTNA	2.79706e-95	3.20087	8.87842e-91	down
DTNB	9.58933e-20	1.39054	3.04384e-15	down
DTNBP1	2.24815e-13	1.66268	7.13607e-09	down
DTWD2	7.32184e-14	1.2665	2.3241e-09	down
DTX1	1.63581e-21	2.67365	5.19239e-17	down
DTX2	2.49502e-45	3.66616	7.91968e-41	down
DUPD1	2.2973e-22	2.07404	7.29209e-18	down
DUSP10	1.18359e-43	4.15702	3.75694e-39	down
DUSP16	6.80821e-13	1.5322	2.16106e-08	down
DUSP22	4.14868e-23	3.45503	1.31687e-18	down
DUSP3	8.44539e-10	1.33409	2.68074e-05	down
DUSP7	2.85003e-11	1.21179	9.04657e-07	down
DVL1	2.65913e-13	1.50301	8.44061e-09	down
DYNC1I2	4.41651e-34	2.37661	1.40189e-29	down
DYNC2H1	8.17161e-59	3.46847	2.59383e-54	down
DYNC2LI1	1.34134e-16	1.5785	4.25769e-12	down
DYNLT3	3.43134e-08	1.20204	0.00108918	down
DYRK1A	3.79102e-31	2.04738	1.20334e-26	down
DYRK4	2.82738e-26	2.00064	8.97466e-22	down
DZIP1	6.47351e-28	2.48776	2.05482e-23	down
E2F1	7.27033e-17	1.28525	2.30775e-12	down
EBAG9	6.17099e-29	2.31882	1.9588e-24	down
EBF1	1.09733e-25	1.83589	3.48316e-21	down
EBF2	8.92764e-53	3.53392	2.83381e-48	down
EBLN1	1.21234e-17	1.74106	3.84821e-13	down
ECHDC2	6.62002e-24	1.35006	2.10133e-19	down
ECI2	1.15359e-26	2.54752	3.66173e-22	down
ECM2	6.46289e-35	3.02868	2.05145e-30	down
ECT2	3.34081e-09	1.09297	0.000106044	down
EDA	1.25109e-22	1.13118	3.97122e-18	down
EDAR	7.46057e-35	2.665	2.36813e-30	down
EDEM1	3.7914e-36	1.93845	1.20347e-31	down
EDIL3	1.73453e-20	1.63272	5.50576e-16	down
EDRF1	8.5805e-52	4.06835	2.72362e-47	down
EEF2K	1.24119e-22	1.35526	3.93978e-18	down
EEFSEC	1.93691e-16	1.49912	6.14815e-12	down
EFCAB14	2.79169e-17	1.36244	8.86137e-13	down
EFCAB6	5.63578e-20	1.63706	1.78891e-15	down
EFEMP2	6.99365e-17	1.16842	2.21992e-12	down
EFHC2	8.22196e-32	2.19187	2.60981e-27	down
EFHD2	6.69075e-16	1.62883	2.12378e-11	down
EFNA1	1.32275e-14	1.43365	4.19867e-10	down
EFNA5	1.75461e-23	1.03138	5.56949e-19	down
EFR3B	2.13341e-51	1.4965	6.77188e-47	down
EGLN3	2.47227e-11	1.01841	7.84749e-07	down
EGR1	4.14441e-32	2.96369	1.31552e-27	down
EHD2	7.65783e-28	2.31373	2.43075e-23	down
EHD3	6.19762e-12	1.4116	1.96725e-07	down
EHD4	1.81548e-16	1.01063	5.7627e-12	down
EHMT1	9.75572e-26	1.44553	3.09666e-21	down
EIF2A	5.00131e-16	1.57767	1.58752e-11	down
EIF2AK2	3.71628e-43	2.97298	1.17962e-38	down
EIF2D	8.2153e-20	2.36676	2.6077e-15	down
EIF4A2	2.50224e-14	1.46496	7.94262e-10	down
EIF4E1B	9.72392e-50	4.65279	3.08657e-45	down
EIF4E3	1.86143e-44	1.87976	5.90856e-40	down
EIF4ENIF1	1.74928e-34	2.3688	5.55258e-30	down
EIF5B	2.00152e-14	1.14701	6.35324e-10	down
EIPR1	8.07243e-24	2.06453	2.56235e-19	down
ELAVL1	3.1188e-12	1.09893	9.8997e-08	down
ELAVL2	1.39387e-18	2.16249	4.42443e-14	down
ELF1	4.40989e-12	1.35139	1.39979e-07	down
ELF5	5.30108e-17	2.06831	1.68267e-12	down
ELFN2	8.69569e-67	1.91105	2.76019e-62	down
ELK3	1.62291e-33	2.17366	5.15145e-29	down
ELK4	1.74537e-16	1.88278	5.54017e-12	down
ELMO1	1.86034e-24	2.36252	5.90508e-20	down
ELMSAN1	7.16876e-49	3.48103	2.27551e-44	down
ELN	5.25627e-24	2.70307	1.66845e-19	down
ELOVL1	1.1256e-19	2.39418	3.57289e-15	down
ELOVL5	3.25766e-23	2.05444	1.03405e-18	down
ELOVL6	9.63104e-55	3.98049	3.05708e-50	down
EMILIN2	8.57773e-38	3.44396	2.72274e-33	down
EML5	5.01838e-15	1.27039	1.59293e-10	down
EML6	8.83861e-24	2.18951	2.80555e-19	down
EMSY	3.81598e-25	1.29306	1.21127e-20	down
EMX1	3.77216e-14	2.13688	1.19736e-09	down
ENG	2.01708e-27	2.67888	6.40263e-23	down
ENOX1	5.82373e-61	3.99331	1.84857e-56	down
ENPP2	4.96819e-39	2.10823	1.577e-34	down
ENPP5	2.34049e-45	4.49154	7.42919e-41	down
ENSA	4.0537e-11	1.01761	1.28672e-06	down
ENTPD7	4.81789e-55	2.46942	1.52929e-50	down
EPAS1	3.07461e-55	3.35992	9.75943e-51	down
EPB41L2	2.91949e-40	2.72379	9.26704e-36	down
EPB41L3	2.53779e-13	1.30001	8.05545e-09	down
EPB41L4A	1.12224e-16	1.6632	3.56222e-12	down
EPB42	2.45663e-23	1.85114	7.79782e-19	down
EPC1	3.07971e-39	1.6628	9.77561e-35	down
EPOR	4.36517e-18	1.50529	1.38559e-13	down
EPS15	6.89088e-20	1.52285	2.1873e-15	down
EPS15L1	6.26397e-19	1.5254	1.98831e-14	down
EPS8	8.35892e-23	1.59318	2.65329e-18	down
EPS8L3	1.13924e-17	2.83991	3.61616e-13	down
EPSTI1	5.34961e-42	3.65389	1.69807e-37	down
ERBB4	1.30072e-88	4.14928	4.12874e-84	down
ERC1	9.53479e-40	2.38975	3.02653e-35	down
ERC2	4.63691e-37	2.09418	1.47185e-32	down
ERCC3	5.70646e-17	1.34324	1.81134e-12	down
ERF	5.76835e-09	1.06014	0.000183099	down
ERFE	1.42859e-40	2.45765	4.53464e-36	down
ERG28	6.17798e-07	1.09618	0.0196101	down
ERICH5	1.00425e-10	1.91876	3.18768e-06	down
ERN1	2.44705e-20	1.26834	7.76742e-16	down
ERO1B	6.49736e-19	1.43101	2.06239e-14	down
ERRFI1	3.7387e-15	1.6105	1.18674e-10	down
ESCO1	7.21e-15	1.15266	2.2886e-10	down
ESCO2	1.02603e-37	2.68505	3.25682e-33	down
ESR2	1.63282e-55	3.70227	5.1829e-51	down
ESRP1	2.28991e-23	1.60844	7.26862e-19	down
ESYT2	1.20309e-30	1.95794	3.81884e-26	down
ESYT3	9.71247e-13	1.57964	3.08293e-08	down
ETAA1	9.45963e-12	1.33577	3.00268e-07	down
ETFA	8.98104e-21	1.88627	2.85076e-16	down
ETV2	3.48387e-10	1.13903	1.10585e-05	down
ETV5	3.25565e-09	1.01237	0.000103341	down
EVA1B	9.52707e-10	1.40482	3.02408e-05	down
EVL	2.35606e-93	1.85774	7.4786e-89	down
EXOC3	7.6124e-10	1.07811	2.41633e-05	down
EXOC4	1.12006e-27	2.25067	3.55531e-23	down
EXT1	1.26071e-34	3.09584	4.00174e-30	down
EXTL3	2.084e-42	2.84098	6.61502e-38	down
EYA1	3.23816e-47	2.96873	1.02786e-42	down
EYA2	3.13059e-55	3.40289	9.93713e-51	down
EZHIP	1.25323e-36	2.99814	3.978e-32	down
F13A1	8.09379e-36	2.63322	2.56913e-31	down
F2	1.71561e-28	3.21622	5.44569e-24	down
FABP3	1.14235e-18	3.40937	3.62606e-14	down
FADS1	5.94039e-47	3.30078	1.8856e-42	down
FADS2	6.14635e-45	2.79476	1.95097e-40	down
FAHD1	9.56476e-10	2.16365	3.03604e-05	down
FAM104B	6.81281e-07	1.31486	0.0216252	down
FAM110A	1.83724e-38	4.02227	5.83178e-34	down
FAM111A	3.04674e-26	2.46884	9.67097e-22	down
FAM111B	4.39756e-27	2.63548	1.39587e-22	down
FAM117A	3.31736e-15	1.21333	1.053e-10	down
FAM120B	1.86225e-38	2.90161	5.91115e-34	down
FAM120C	4.12732e-11	1.05823	1.31009e-06	down
FAM122A	2.23516e-26	2.0732	7.09485e-22	down
FAM122B	3.56531e-20	1.8366	1.1317e-15	down
FAM126A	3.46481e-18	1.74962	1.0998e-13	down
FAM129B	9.77385e-47	2.50366	3.10242e-42	down
FAM13A	2.34923e-58	3.86549	7.45693e-54	down
FAM13B	6.46598e-20	1.3482	2.05243e-15	down
FAM149A	8.76946e-30	1.3801	2.7836e-25	down
FAM160A1	8.39113e-50	3.59608	2.66351e-45	down
FAM160A2	3.0759e-33	2.315	9.76353e-29	down
FAM161B	3.35613e-15	1.08842	1.0653e-10	down
FAM168A	1.05383e-15	1.35844	3.34508e-11	down
FAM168B	1.99102e-24	1.76949	6.31991e-20	down
FAM169A	8.43076e-27	2.85139	2.67609e-22	down
FAM171B	7.22733e-27	2.00735	2.2941e-22	down
FAM174A	1.22828e-19	2.53472	3.89881e-15	down
FAM177A1	8.53897e-10	1.23905	2.71044e-05	down
FAM178B	5.18157e-14	1.2357	1.64473e-09	down
FAM183A	3.10797e-11	1.54535	9.86533e-07	down
FAM184B	1.09773e-27	1.51959	3.48442e-23	down
FAM189A2	3.46053e-26	2.25606	1.09844e-21	down
FAM193A	2.06985e-31	2.38492	6.57011e-27	down
FAM199X	8.47042e-37	2.37831	2.68868e-32	down
FAM210A	5.81533e-17	1.53783	1.8459e-12	down
FAM210B	1.41785e-28	1.72121	4.50054e-24	down
FAM214A	1.85e-31	2.43066	5.87229e-27	down
FAM218A	2.97634e-13	1.01986	9.4475e-09	down
FAM220A	1.0367e-47	3.7898	3.29068e-43	down
FAM222B	3.36187e-15	1.59053	1.06712e-10	down
FAM228B	5.82306e-26	1.58762	1.84836e-21	down
FAM3C	1.50308e-26	1.77642	4.77108e-22	down
FAM53A	2.5072e-34	3.12243	7.95837e-30	down
FAM53B	6.89621e-25	1.66051	2.189e-20	down
FAM81A	1.1719e-39	3.42832	3.71984e-35	down
FAM92B	3.7125e-28	1.4987	1.17842e-23	down
FAM9B	1.40743e-07	1.66863	0.00446746	down
FAM9C	1.70711e-09	1.06013	5.41869e-05	down
FANK1	5.98094e-21	2.23257	1.89847e-16	down
FARP1	1.93394e-24	1.71301	6.1387e-20	down
FARP2	1.97861e-16	1.31525	6.28052e-12	down
FAXDC2	2.12586e-57	1.85837	6.74791e-53	down
FBLN5	8.55514e-26	2.4654	2.71557e-21	down
FBLN7	9.23349e-23	2.47675	2.93089e-18	down
FBXL4	4.47899e-18	1.36286	1.42172e-13	down
FBXL5	5.4095e-26	2.84014	1.71708e-21	down
FBXL6	2.24666e-13	1.64494	7.13134e-09	down
FBXL7	8.47277e-66	2.41569	2.68943e-61	down
FBXO15	6.00056e-13	1.34675	1.9047e-08	down
FBXO3	9.54244e-17	1.26642	3.02896e-12	down
FBXO30	2.91688e-24	2.5352	9.25875e-20	down
FBXO33	6.5392e-17	1.56413	2.07567e-12	down
FBXO34	2.87249e-18	2.15448	9.11785e-14	down
FBXO43	1.88961e-19	1.75736	5.99799e-15	down
FBXO6	2.7124e-09	1.67595	8.60971e-05	down
FBXO9	3.11938e-44	3.34877	9.90154e-40	down
FBXW12	1.92035e-64	3.97626	6.09557e-60	down
FCER2	2.11186e-07	1.98491	0.00670346	down
FCGRT	3.06648e-18	1.00764	9.73363e-14	down
FCHO1	5.3194e-53	3.79924	1.68848e-48	down
FDFT1	1.71526e-33	2.90516	5.44458e-29	down
FEM1C	2.92597e-14	1.33595	9.2876e-10	down
FER	7.22614e-40	3.02261	2.29372e-35	down
FER1L6	5.28616e-43	2.70343	1.67793e-38	down
FETUB	4.83971e-19	1.883	1.53622e-14	down
FEZ2	5.14613e-44	3.32206	1.63349e-39	down
FGD5	1.51422e-101	2.10592	4.80645e-97	down
FGF14	2.63073e-51	4.40882	8.35047e-47	down
FGF19	3.02722e-15	2.98874	9.60899e-11	down
FGF9	2.04194e-19	1.918	6.48152e-15	down
FGFR1OP	6.74437e-32	2.14576	2.1408e-27	down
FGFRL1	8.13385e-13	1.36313	2.58185e-08	down
FGGY	1.20784e-08	1.22638	0.000383391	down
FHIT	1.64988e-33	3.29173	5.23706e-29	down
FHOD3	7.75325e-39	2.76033	2.46104e-34	down
FIG4	1.73829e-29	2.10446	5.51768e-25	down
FIGLA	3.99647e-10	3.06439	1.26856e-05	down
FKBP9	1.70387e-54	3.57624	5.40842e-50	down
FLCN	4.44379e-21	1.19502	1.41055e-16	down
FLRT2	2.42208e-41	3.43036	7.68818e-37	down
FLT3LG	4.54099e-24	1.38235	1.4414e-19	down
FMN1	9.67792e-29	1.76042	3.07196e-24	down
FMN2	1.07006e-54	2.81819	3.3966e-50	down
FMNL2	5.09162e-64	2.80531	1.61618e-59	down
FMO2	2.12723e-64	2.75501	6.75225e-60	down
FNBP1	1.5348e-20	2.2934	4.87175e-16	down
FNDC11	5.62205e-07	1.8955	0.0178455	down
FNDC3B	4.1533e-16	1.44974	1.31834e-11	down
FNTB	1.5345e-11	1.02989	4.8708e-07	down
FOS	6.99554e-13	2.80997	2.22052e-08	down
FOSL1	1.58026e-34	1.93351	5.01606e-30	down
FOXO1	1.81537e-08	1.23688	0.000576234	down
FOXO3	1.56346e-17	1.13357	4.96275e-13	down
FOXP1	2.06291e-58	1.70774	6.54808e-54	down
FOXP3	8.89361e-15	1.14772	2.82301e-10	down
FOXP4	8.94003e-18	1.44303	2.83775e-13	down
FPGS	5.52162e-14	1.32358	1.75267e-09	down
FPGT	7.176e-25	2.45472	2.2778e-20	down
FRMD3	3.34312e-57	2.1603	1.06117e-52	down
FRMD6	2.26374e-44	2.8831	7.18556e-40	down
FRZB	2.92917e-34	3.31631	9.29777e-30	down
FSIP1	6.99894e-30	1.95666	2.22161e-25	down
FSTL4	1.20819e-37	2.0666	3.83502e-33	down
FTL	5.66443e-10	1.14613	1.798e-05	down
FTO	2.18199e-12	1.06333	6.92606e-08	down
FUCA2	1.68304e-17	1.83862	5.3423e-13	down
FUT1	7.32026e-17	3.93715	2.3236e-12	down
FUT10	1.82262e-12	1.09073	5.78537e-08	down
FUT11	9.61713e-37	2.13812	3.05267e-32	down
FUT8	1.70388e-23	2.40445	5.40846e-19	down
FYB2	6.39343e-22	2.27572	2.0294e-17	down
FYN	3.24956e-39	2.41509	1.03148e-34	down
FYTTD1	4.58729e-14	1.32871	1.4561e-09	down
FZD3	1.03802e-44	3.26497	3.29487e-40	down
FZD6	5.81322e-21	2.32196	1.84523e-16	down
GAB1	8.20861e-36	2.89028	2.60558e-31	down
GAB2	1.04935e-49	3.21769	3.33085e-45	down
GAB4	3.5673e-11	1.38421	1.13233e-06	down
GABBR2	8.38856e-23	1.86009	2.6627e-18	down
GABPA	4.15805e-16	1.59965	1.31985e-11	down
GABRR3	4.67654e-44	3.51961	1.48443e-39	down
GAD2	5.02805e-44	1.64402	1.596e-39	down
GADD45B	1.73519e-16	1.841	5.50784e-12	down
GADL1	1.17631e-104	3.40748	3.73383e-100	down
GAL	5.3788e-11	1.53758	1.70734e-06	down
GAL3ST3	1.24424e-11	1.02719	3.94946e-07	down
GALNT13	3.32691e-21	1.43638	1.05603e-16	down
GALNT2	6.57448e-20	1.14876	2.08687e-15	down
GALNT3	7.10437e-38	2.61845	2.25507e-33	down
GALP	5.19478e-08	1.53552	0.00164893	down
GALR1	1.40859e-15	1.46602	4.47114e-11	down
GAREM2	1.48828e-14	2.02039	4.72411e-10	down
GARNL3	2.30655e-77	4.66689	7.32145e-73	down
GAS7	8.90579e-64	2.92037	2.82687e-59	down
GAS8	2.69873e-10	1.11798	8.56629e-06	down
GASK1A	3.53396e-53	2.31034	1.12175e-48	down
GAST	8.04984e-15	3.04697	2.55518e-10	down
GATA2	6.39695e-13	2.24963	2.03052e-08	down
GATAD2B	5.00532e-18	1.54205	1.58879e-13	down
GATM	1.47284e-40	3.52171	4.67507e-36	down
GBA	8.45471e-10	1.39033	2.68369e-05	down
GBF1	4.62586e-28	1.73083	1.46834e-23	down
GCA	1.47398e-20	1.93072	4.67871e-16	down
GCC2	9.87208e-35	2.87678	3.1336e-30	down
GCFC2	7.50868e-16	1.67709	2.38341e-11	down
GCH1	5.30501e-27	2.5287	1.68391e-22	down
GCLC	1.12955e-17	1.82524	3.58543e-13	down
GCLM	1.54336e-09	1.34303	4.89892e-05	down
GCM1	1.71409e-13	2.81905	5.44088e-09	down
GCNT1	3.22384e-18	1.29507	1.02331e-13	down
GCNT3	3.28518e-15	2.72048	1.04278e-10	down
GDA	2.15219e-60	3.80944	6.83149e-56	down
GDAP1	2.03821e-39	3.14591	6.46967e-35	down
GDF9	4.13125e-30	3.98483	1.31134e-25	down
GDI1	5.2509e-20	1.74687	1.66674e-15	down
GDI2	1.57507e-18	1.92344	4.99959e-14	down
GDPD4	4.12849e-34	3.12959	1.31046e-29	down
GDPGP1	1.70682e-19	1.44931	5.41778e-15	down
GFRA1	3.18746e-70	3.62057	1.01176e-65	down
GFRA2	1.90657e-36	2.27501	6.05184e-32	down
GFY	7.48738e-13	1.93453	2.37664e-08	down
GGACT	2.22987e-43	3.58391	7.07805e-39	down
GGCT	4.83591e-12	1.7159	1.53501e-07	down
GGT1	1.17411e-18	2.01998	3.72686e-14	down
GGT7	5.46808e-16	1.70337	1.73568e-11	down
GIMD1	9.41525e-16	2.76128	2.98859e-11	down
GINS2	2.8158e-11	1.46053	8.93793e-07	down
GIPC2	6.58081e-29	1.54329	2.08888e-24	down
GIT1	5.01847e-10	1.13586	1.59296e-05	down
GIT2	3.02489e-43	3.43203	9.60161e-39	down
GJC1	4.76175e-17	2.03264	1.51148e-12	down
GKAP1	2.7817e-35	2.55141	8.82968e-31	down
GLCCI1	2.30671e-20	1.85417	7.32195e-16	down
GLCE	1.13608e-30	1.87486	3.60613e-26	down
GLDC	4.02125e-32	2.45669	1.27642e-27	down
GLE1	1.66332e-17	1.2786	5.27973e-13	down
GLIPR1	4.66807e-50	4.92045	1.48174e-45	down
GLIS2	4.63557e-46	2.64245	1.47142e-41	down
GLP2R	2.49413e-31	3.01922	7.91686e-27	down
GLRA2	2.61266e-25	1.55222	8.2931e-21	down
GLRB	1.17425e-16	1.20511	3.72729e-12	down
GLRX	1.26001e-23	3.61419	3.99951e-19	down
GLS2	1.13579e-25	2.64263	3.60521e-21	down
GLYATL3	5.44615e-16	2.62681	1.72872e-11	down
GM2A	7.38657e-08	1.3623	0.00234465	down
GMFB	4.31523e-36	2.84414	1.36974e-31	down
GMPR	7.33866e-51	4.6209	2.32944e-46	down
GNA11	8.05937e-15	2.00074	2.5582e-10	down
GNA13	9.92242e-32	2.46449	3.14957e-27	down
GNA14	1.18512e-64	3.34873	3.76181e-60	down
GNAI1	3.28737e-31	2.81168	1.04348e-26	down
GNB1L	2.98925e-11	1.19775	9.48848e-07	down
GNB2	1.75851e-14	1.51761	5.58187e-10	down
GNB3	7.82841e-14	2.37585	2.48489e-09	down
GNG12	1.93244e-35	3.45865	6.13396e-31	down
GNG2	5.7313e-33	3.17731	1.81923e-28	down
GNG3	7.9227e-14	2.10103	2.51482e-09	down
GNG8	3.25832e-12	2.35255	1.03426e-07	down
GNPAT	1.55699e-36	2.91901	4.94219e-32	down
GNPDA2	5.6411e-41	4.24617	1.7906e-36	down
GNPTG	1.43839e-16	1.86717	4.56573e-12	down
GNRHR2	1.49729e-23	1.41796	4.75271e-19	down
GNS	1.94323e-32	2.28065	6.16821e-28	down
GOLGA3	1.17758e-11	1.04365	3.73788e-07	down
GOLGA5	7.18034e-28	1.92065	2.27918e-23	down
GOLGA7	4.30698e-24	1.54821	1.36712e-19	down
GOLM1	2.8113e-18	2.13361	8.92364e-14	down
GOLPH3	6.26104e-13	1.34366	1.98738e-08	down
GOLPH3L	2.41288e-22	2.33824	7.65895e-18	down
GP9	4.83957e-50	4.10099	1.53618e-45	down
GPAM	1.012e-13	1.36702	3.21228e-09	down
GPATCH1	4.78161e-18	1.34397	1.51778e-13	down
GPBP1	3.25546e-15	1.223	1.03335e-10	down
GPC4	3.30908e-14	1.51389	1.05037e-09	down
GPC5	2.29646e-55	3.80472	7.28943e-51	down
GPC6	5.1841e-65	3.06508	1.64554e-60	down
GPHA2	1.41081e-12	2.50825	4.4782e-08	down
GPHN	7.48134e-09	1.40898	0.000237473	down
GPI	3.55897e-14	1.57989	1.12969e-09	down
GPM6A	7.42591e-44	2.44693	2.35713e-39	down
GPM6B	1.254e-14	1.96583	3.98046e-10	down
GPR137B	1.18094e-53	2.09379	3.74853e-49	down
GPR143	5.74435e-09	1.71349	0.000182337	down
GPR158	2.98873e-42	2.21773	9.48683e-38	down
GPR160	1.3644e-31	3.37774	4.33089e-27	down
GPR161	2.57769e-16	1.65165	8.18211e-12	down
GPR3	4.53375e-07	1.4589	0.014391	down
GPRC5A	8.18809e-33	1.52905	2.59906e-28	down
GPSM2	2.79554e-14	1.35058	8.8736e-10	down
GRAMD2B	6.8789e-13	1.96648	2.1835e-08	down
GRAP2	1.89045e-13	1.92889	6.00068e-09	down
GRB7	9.81132e-62	5.31199	3.11431e-57	down
GREB1	1.58082e-28	1.59809	5.01783e-24	down
GREB1L	5.00516e-13	1.14426	1.58874e-08	down
GRHL1	3.93035e-52	3.54504	1.24757e-47	down
GRHL2	3.19355e-44	2.23606	1.0137e-39	down
GRHL3	3.34997e-47	3.52586	1.06335e-42	down
GRIK2	3.94076e-199	2.96397	1.25088e-194	down
GRIK4	7.44606e-58	2.04959	2.36353e-53	down
GRIN2B	4.02821e-25	1.60016	1.27863e-20	down
GRIN2D	1.8198e-40	1.33223	5.77641e-36	down
GRK3	3.30594e-09	1.20986	0.000104937	down
GRM4	5.23706e-41	2.82007	1.66235e-36	down
GRM7	5.76662e-101	1.76696	1.83044e-96	down
GRM8	1.3377e-34	1.87438	4.24613e-30	down
GRTP1	5.30427e-29	3.05993	1.68368e-24	down
GSDME	7.39792e-26	2.45126	2.34825e-21	down
GSE1	1.08405e-23	1.36715	3.44099e-19	down
GSR	7.91968e-17	1.69115	2.51387e-12	down
GSTM2	2.98485e-17	1.55022	9.47452e-13	down
GSTM3	9.89504e-21	2.18353	3.14088e-16	down
GSTM4	1.7824e-09	1.93042	5.65769e-05	down
GSTT2B	4.43857e-07	1.39	0.0140889	down
GTF2A1L	2.64425e-74	5.02557	8.39338e-70	down
GTF3C3	2.33313e-23	2.6405	7.40581e-19	down
GTSF1	2.06906e-36	3.84086	6.56761e-32	down
GUCY2D	7.12832e-21	1.56195	2.26267e-16	down
GULP1	1.26474e-61	3.91293	4.01453e-57	down
GYG1	5.98221e-11	1.37812	1.89887e-06	down
H2AFB3	4.54482e-07	1.17921	0.0144262	down
H2AFX	3.1337e-30	2.44896	9.947e-26	down
H2AFY2	2.39372e-53	3.40805	7.59814e-49	down
H6PD	4.78123e-13	1.4873	1.51766e-08	down
HABP4	4.86515e-13	1.2947	1.5443e-08	down
HADH	6.06016e-39	3.00696	1.92362e-34	down
HADHA	8.18647e-12	1.17669	2.59855e-07	down
HAGH	6.17086e-39	3.18681	1.95875e-34	down
HAS2	8.43166e-26	2.2695	2.67638e-21	down
HAVCR2	1.16448e-20	1.07401	3.69628e-16	down
HBZ	4.0524e-33	1.90226	1.28631e-28	down
HCFC1	1.82567e-15	1.04278	5.79503e-11	down
HCN4	1.40553e-82	1.94403	4.46142e-78	down
HCRTR2	1.13215e-17	2.24158	3.59366e-13	down
HDAC11	8.56212e-14	1.45834	2.71779e-09	down
HDAC9	3.05122e-92	1.85888	9.68519e-88	down
HDC	6.41602e-07	2.04033	0.0203657	down
HDGFL2	1.11985e-12	1.3129	3.55463e-08	down
HEBP1	8.00846e-27	1.37049	2.54204e-22	down
HECTD2	5.83826e-49	2.01045	1.85318e-44	down
HENMT1	1.3682e-33	4.27111	4.34295e-29	down
HERPUD2	9.34565e-47	2.68558	2.9665e-42	down
HES2	1.76302e-29	2.46805	5.59617e-25	down
HES6	2.84225e-11	1.46461	9.02186e-07	down
HEXB	3.42826e-21	2.19658	1.0882e-16	down
HEXIM1	5.14263e-27	1.20496	1.63237e-22	down
HEXIM2	1.61059e-24	2.37097	5.11232e-20	down
HEY2	1.40096e-15	1.90371	4.44692e-11	down
HHEX	2.88059e-16	2.05566	9.14358e-12	down
HHLA2	4.04175e-50	3.86198	1.28293e-45	down
HIBADH	1.18493e-32	3.38475	3.76121e-28	down
HIBCH	4.02923e-12	1.25335	1.27896e-07	down
HID1	1.60872e-22	1.68335	5.10641e-18	down
HIF1A	1.5388e-23	1.86316	4.88447e-19	down
HIF3A	2.04974e-09	1.81777	6.50629e-05	down
HINT1	3.20016e-11	1.23259	1.0158e-06	down
HIP1R	1.34977e-27	1.64765	4.28443e-23	down
HIPK4	7.43472e-30	2.44044	2.35993e-25	down
HIRIP3	1.63408e-26	2.2912	5.1869e-22	down
HIST1H1A	7.51495e-34	2.69515	2.3854e-29	down
HIST1H2AD	2.88606e-11	2.03332	9.16092e-07	down
HIST1H2AE	4.00138e-12	2.53432	1.27012e-07	down
HIST1H2BH	3.3143e-12	1.22405	1.05203e-07	down
HIST1H3D	6.24655e-23	3.3558	1.98278e-18	down
HIST2H3A	1.01256e-39	1.59803	3.21406e-35	down
HJURP	5.1761e-35	2.52564	1.643e-30	down
HJV	1.41488e-08	1.33902	0.000449111	down
HMCES	7.04614e-10	1.44788	2.23658e-05	down
HMCN1	9.51546e-71	3.8104	3.0204e-66	down
HMG20A	2.17758e-26	2.24177	6.91209e-22	down
HMGCS1	1.98857e-09	1.15766	6.31213e-05	down
HMGN2	1.22953e-08	1.19775	0.000390276	down
HMOX1	1.47196e-09	1.21543	4.67228e-05	down
HNF1A	8.29696e-42	1.39412	2.63362e-37	down
HNF1B	7.68181e-128	1.96471	2.43836e-123	down
HNRNPCL1	1.96273e-11	1.91888	6.2301e-07	down
HOMER1	2.46048e-12	1.20758	7.81005e-08	down
HOOK1	6.8114e-41	2.87681	2.16208e-36	down
HOXA7	6.26133e-10	1.94205	1.98747e-05	down
HOXB6	7.35267e-23	3.81329	2.33388e-18	down
HOXC10	6.40827e-08	2.38666	0.00203411	down
HOXC9	1.95037e-17	1.29685	6.19086e-13	down
HOXD8	2.9796e-07	1.28311	0.00945786	down
HPS4	9.20517e-36	2.2521	2.9219e-31	down
HRH2	2.01416e-38	3.70328	6.39335e-34	down
HS1BP3	1.90757e-12	1.75937	6.05502e-08	down
HSBP1L1	1.08993e-22	1.26577	3.45966e-18	down
HSD11B1	2.99223e-69	1.72366	9.49795e-65	down
HSD11B1L	5.64368e-29	2.27616	1.79142e-24	down
HSD17B12	2.57685e-33	2.64618	8.17945e-29	down
HSD17B4	1.02833e-25	2.37092	3.26411e-21	down
HSDL1	4.99695e-27	3.1944	1.58613e-22	down
HSF2BP	4.79853e-20	2.04159	1.52315e-15	down
HSP90B1	9.37752e-11	1.68018	2.97661e-06	down
HSPA1A	1.32329e-10	1.97643	4.20038e-06	down
HSPB1	1.50018e-28	3.54376	4.76187e-24	down
HSPB6	1.19452e-31	3.20253	3.79166e-27	down
HSPBAP1	4.23588e-10	1.23861	1.34455e-05	down
HTR1D	9.98224e-55	3.10495	3.16856e-50	down
HTRA1	1.97972e-18	2.42284	6.28403e-14	down
HTRA3	5.71361e-37	4.19784	1.81361e-32	down
HVCN1	7.22864e-30	3.49307	2.29452e-25	down
HYLS1	1.83098e-08	1.1268	0.000581189	down
IAH1	9.46825e-46	4.7473	3.00541e-41	down
ICA1	1.63294e-32	3.08907	5.18327e-28	down
ICA1L	9.04223e-61	3.39126	2.87018e-56	down
ICAM1	8.31771e-19	1.86585	2.64021e-14	down
ID2	1.47409e-14	1.58896	4.67906e-10	down
IDE	8.6717e-15	1.33332	2.75257e-10	down
IDH2	1.48704e-24	2.58989	4.72018e-20	down
IDS	2.61402e-30	2.51976	8.29743e-26	down
IER3	1.55841e-15	1.19009	4.94672e-11	down
IFFO1	2.17606e-11	1.53254	6.90724e-07	down
IFNL3	3.18169e-11	2.50588	1.00993e-06	down
IFT52	3.80589e-14	1.50692	1.20807e-09	down
IFT57	1.67929e-21	2.3567	5.33042e-17	down
IGBP1	8.52495e-08	1.07541	0.00270599	down
IGF1R	9.49192e-15	1.46152	3.01292e-10	down
IGF2	5.15805e-13	1.02032	1.63727e-08	down
IGF2BP3	1.27822e-50	3.55638	4.05733e-46	down
IGFALS	8.25133e-27	2.90265	2.61914e-22	down
IGFBP3	5.26933e-18	2.81712	1.67259e-13	down
IGFBP4	1.32699e-21	2.43417	4.21215e-17	down
IGFBP5	3.74865e-24	2.1555	1.1899e-19	down
IGSF10	4.58922e-40	2.62769	1.45671e-35	down
IGSF11	6.76337e-43	2.6977	2.14683e-38	down
IGSF8	1.39637e-16	2.19538	4.43235e-12	down
IGSF9	3.59895e-24	2.0544	1.14238e-19	down
IL13RA1	3.9692e-16	1.40594	1.2599e-11	down
IL15RA	6.32902e-17	1.95296	2.00896e-12	down
IL16	4.94549e-55	3.08504	1.5698e-50	down
IL17B	1.39233e-09	1.33364	4.41952e-05	down
IL17RD	7.44066e-16	1.13622	2.36182e-11	down
IL1RAPL1	4.43477e-65	2.77274	1.40768e-60	down
IL23A	5.99774e-19	2.69673	1.9038e-14	down
IL27RA	7.18238e-46	2.93985	2.27983e-41	down
IL34	3.23344e-41	3.29661	1.02636e-36	down
IL3RA	4.75074e-23	1.20439	1.50798e-18	down
IL5RA	2.82943e-34	1.9432	8.98118e-30	down
ILDR2	2.69944e-30	2.32767	8.56856e-26	down
ILKAP	7.74395e-13	1.43663	2.45808e-08	down
ILRUN	4.08524e-10	1.05454	1.29674e-05	down
INAFM1	2.25224e-09	1.86123	7.14906e-05	down
INCA1	1.2339e-22	2.13456	3.91666e-18	down
INCENP	2.17206e-19	1.37319	6.89455e-15	down
ING1	6.48552e-12	1.47117	2.05863e-07	down
ING3	2.59507e-08	1.21995	0.000823726	down
INPP1	3.63023e-17	2.35346	1.15231e-12	down
INPP4A	4.15536e-24	1.12383	1.31899e-19	down
INPP4B	3.696e-29	2.9097	1.17318e-24	down
INPP5B	2.23409e-17	1.40274	7.09145e-13	down
INPP5E	1.64295e-25	1.87018	5.21505e-21	down
INPP5J	4.28374e-20	2.09303	1.35975e-15	down
INSIG2	3.47374e-24	2.09583	1.10263e-19	down
INSL6	5.17264e-07	1.404	0.016419	down
INTS12	3.89513e-13	1.25856	1.23639e-08	down
INTS8	2.31098e-21	1.57632	7.33551e-17	down
INTS9	3.42775e-26	2.30022	1.08804e-21	down
IPO8	1.0594e-41	3.5089	3.36274e-37	down
IQCA1	1.35397e-07	1.9921	0.00429778	down
IQCE	1.95857e-47	1.47368	6.21688e-43	down
IQGAP2	6.47751e-28	2.14464	2.05609e-23	down
IQSEC2	3.87365e-57	1.40288	1.22957e-52	down
IQSEC3	1.2634e-55	1.73671	4.01029e-51	down
IRAK1BP1	1.19864e-20	1.54105	3.80473e-16	down
IRF1	1.33708e-08	1.17899	0.000424416	down
IRF2	4.52431e-37	3.74784	1.43611e-32	down
IRF6	1.66534e-12	1.82237	5.28612e-08	down
IRF8	1.18927e-32	2.62183	3.77499e-28	down
IRX4	1.00332e-08	1.84644	0.000318473	down
ISL1	6.51395e-15	1.98881	2.06766e-10	down
ISYNA1	8.35732e-13	2.02235	2.65278e-08	down
ITGA5	6.44738e-27	1.64438	2.04653e-22	down
ITGA6	1.1211e-13	1.62919	3.55859e-09	down
ITGAL	7.04221e-19	1.29251	2.23534e-14	down
ITGBL1	2.48562e-51	2.92618	7.88985e-47	down
ITPR1	3.98744e-13	1.32144	1.26569e-08	down
ITPR3	5.54255e-15	1.37561	1.75932e-10	down
ITPRID2	1.98341e-21	1.97538	6.29575e-17	down
ITPRIPL1	1.79099e-14	1.84225	5.68495e-10	down
ITSN1	1.14276e-27	1.69824	3.62734e-23	down
ITSN2	4.01757e-20	1.15313	1.27526e-15	down
IWS1	8.82743e-20	1.63138	2.802e-15	down
IZUMO1	6.72612e-36	1.71081	2.135e-31	down
IZUMO1R	2.76284e-40	3.60332	8.76982e-36	down
IZUMO2	1.63401e-13	1.28336	5.18668e-09	down
JAG1	8.81296e-38	2.52671	2.79741e-33	down
JAKMIP2	1.02603e-15	1.5667	3.25683e-11	down
JAM2	3.80917e-49	1.55915	1.20911e-44	down
JAM3	4.08976e-29	1.99855	1.29817e-24	down
JAZF1	3.67607e-31	3.251	1.16686e-26	down
JCHAIN	4.85414e-14	1.29016	1.5408e-09	down
JPH1	6.48603e-07	1.01435	0.0205879	down
JPT2	2.65726e-11	1.09079	8.43468e-07	down
JUP	8.15409e-09	1.33826	0.000258827	down
KALRN	3.72559e-66	4.66076	1.18258e-61	down
KANK1	3.84495e-36	2.57359	1.22046e-31	down
KAT2A	8.65176e-30	2.80588	2.74624e-25	down
KAT6A	7.15736e-17	1.00868	2.27189e-12	down
KATNA1	1.11597e-24	2.07106	3.54231e-20	down
KATNAL1	7.67072e-39	3.299	2.43484e-34	down
KATNAL2	9.09748e-25	1.729	2.88772e-20	down
KATNB1	1.22161e-23	2.11835	3.87763e-19	down
KBTBD3	2.33262e-30	1.70234	7.4042e-26	down
KCNAB2	1.2205e-13	1.49747	3.8741e-09	down
KCNC2	2.83404e-17	1.46092	8.99581e-13	down
KCNC4	3.48834e-14	1.36623	1.10727e-09	down
KCNH1	7.01055e-26	1.62214	2.22529e-21	down
KCNH3	3.98998e-12	2.27465	1.2665e-07	down
KCNIP2	2.07022e-09	1.00235	6.57129e-05	down
KCNIP4	2.7143e-44	3.4602	8.61575e-40	down
KCNJ15	1.84791e-36	2.1413	5.86563e-32	down
KCNJ16	2.41966e-37	3.56967	7.68049e-33	down
KCNJ5	2.22838e-11	2.03697	7.07333e-07	down
KCNJ6	1.4284e-43	3.32371	4.53401e-39	down
KCNK16	4.60324e-35	3.27302	1.46116e-30	down
KCNK9	1.40844e-47	4.59375	4.47066e-43	down
KCNN2	3.76456e-53	3.05493	1.19495e-48	down
KCNT1	2.21085e-20	1.58402	7.01768e-16	down
KCTD1	2.81999e-38	3.44704	8.95121e-34	down
KCTD13	1.59276e-29	2.4939	5.05575e-25	down
KCTD14	7.36352e-13	3.22076	2.33733e-08	down
KCTD21	1.95451e-22	2.36283	6.20402e-18	down
KDELR2	9.18764e-12	1.37582	2.91634e-07	down
KDM1B	6.92196e-44	3.08961	2.19717e-39	down
KDM5C	4.2834e-14	1.12055	1.35964e-09	down
KDM6B	5.55183e-37	1.81735	1.76226e-32	down
KHDC3L	1.77733e-40	3.27581	5.6416e-36	down
KHDRBS3	2.92782e-50	2.34321	9.29348e-46	down
KIAA0040	5.89991e-10	1.73542	1.87275e-05	down
KIAA0355	6.70097e-21	1.8157	2.12702e-16	down
KIAA0586	2.14662e-23	1.87073	6.81381e-19	down
KIAA0825	5.79694e-66	3.1784	1.84006e-61	down
KIAA0895L	1.04095e-16	2.69882	3.3042e-12	down
KIAA1109	2.55495e-09	1.01653	8.10991e-05	down
KIAA1147	8.22113e-18	1.9165	2.60955e-13	down
KIAA1257	2.75741e-69	2.70618	8.75257e-65	down
KIAA1324L	4.98358e-27	2.30515	1.58189e-22	down
KIAA1328	1.69924e-20	1.70156	5.39374e-16	down
KIAA1522	6.00634e-30	2.05703	1.90653e-25	down
KIAA1549	4.66748e-50	1.66775	1.48155e-45	down
KIAA1549L	4.46642e-35	2.40691	1.41773e-30	down
KIAA1755	8.02267e-59	4.04305	2.54656e-54	down
KIF13B	1.10515e-49	1.98655	3.50796e-45	down
KIF14	3.44994e-11	1.1159	1.09508e-06	down
KIF16B	6.23097e-26	1.29996	1.97783e-21	down
KIF21B	3.66556e-10	1.3954	1.16352e-05	down
KIF26B	4.23826e-24	1.82356	1.34531e-19	down
KIF3A	2.92467e-34	2.70032	9.28349e-30	down
KIF4A	1.60511e-23	1.63621	5.09495e-19	down
KIF5B	7.13269e-15	1.09509	2.26406e-10	down
KIF6	6.95645e-39	1.60656	2.20812e-34	down
KIFC3	2.16246e-58	3.63904	6.86407e-54	down
KIZ	5.40506e-11	1.09018	1.71567e-06	down
KLC2	7.83854e-09	1.57332	0.000248811	down
KLF12	5.25501e-33	2.11131	1.66805e-28	down
KLF18	6.51029e-09	1.98556	0.00020665	down
KLF2	2.33982e-28	4.36843	7.42707e-24	down
KLHDC1	3.93316e-117	2.36632	1.24846e-112	down
KLHDC10	6.65934e-16	1.08552	2.11381e-11	down
KLHDC9	6.84951e-08	1.72513	0.00217417	down
KLHL1	2.97781e-61	2.2681	9.45216e-57	down
KLHL18	2.80513e-12	1.07544	8.90405e-08	down
KLHL23	6.82557e-18	2.80255	2.16657e-13	down
KLHL26	8.74919e-10	1.03318	2.77717e-05	down
KLHL28	1.53786e-47	3.15018	4.88148e-43	down
KLHL3	1.0018e-26	3.82585	3.17991e-22	down
KLHL36	7.7323e-12	1.96668	2.45439e-07	down
KLHL7	2.08669e-18	1.73388	6.62356e-14	down
KLK4	2.04357e-17	2.21484	6.48671e-13	down
KLK5	5.2806e-156	1.89227	1.67617e-151	down
KLK6	2.08838e-37	3.42525	6.62892e-33	down
KMT2C	9.7919e-21	1.35294	3.10814e-16	down
KPNA7	3.91854e-34	4.58387	1.24382e-29	down
KRBA2	6.63306e-17	2.07691	2.10547e-12	down
KRCC1	2.95335e-70	1.99958	9.37451e-66	down
KRT15	3.56436e-09	2.47926	0.00011314	down
KRT222	1.69484e-41	4.54304	5.37976e-37	down
KYNU	1.55953e-29	2.25391	4.95026e-25	down
L2HGDH	1.14217e-22	1.88724	3.62548e-18	down
LACC1	6.53011e-09	1.49843	0.000207279	down
LAD1	2.17192e-30	3.39432	6.89412e-26	down
LAGE3	1.43513e-24	2.36008	4.55539e-20	down
LAMB4	4.57167e-67	2.3821	1.45114e-62	down
LAMP3	3.03042e-66	2.4425	9.61915e-62	down
LARP4B	3.52225e-25	1.71304	1.11803e-20	down
LARS2	1.94561e-27	1.65419	6.17576e-23	down
LBH	4.86547e-22	1.40519	1.5444e-17	down
LCA5	3.18689e-22	1.8158	1.01158e-17	down
LCMT1	1.46603e-11	1.16736	4.65346e-07	down
LCN6	6.44668e-31	2.29289	2.0463e-26	down
LCN9	3.23355e-21	1.67182	1.02639e-16	down
LCOR	2.45123e-19	1.80346	7.7807e-15	down
LCP1	3.3945e-13	2.67338	1.07748e-08	down
LDAH	1.59597e-25	2.39326	5.06593e-21	down
LDB2	3.85248e-193	2.74482	1.22285e-188	down
LDHAL6A	1.09346e-42	4.22851	3.47086e-38	down
LDLRAD3	7.24349e-38	2.57289	2.29923e-33	down
LDOC1	8.7199e-12	1.24653	2.76787e-07	down
LEF1	6.47572e-53	3.81316	2.05552e-48	down
LEKR1	8.62942e-68	1.62187	2.73915e-63	down
LEUTX	5.73174e-21	2.33132	1.81937e-16	down
LGALS8	1.98215e-58	4.99838	6.29174e-54	down
LHFPL1	7.7922e-14	2.22478	2.4734e-09	down
LHFPL2	2.91042e-13	1.52125	9.23824e-09	down
LHFPL3	1.89544e-36	2.9267	6.01652e-32	down
LHFPL6	9.33139e-41	2.63436	2.96197e-36	down
LHX8	2.36102e-21	2.86324	7.49436e-17	down
LIFR	1.12229e-20	1.35281	3.56237e-16	down
LIMA1	1.12768e-40	3.34451	3.57947e-36	down
LIMCH1	3.9226e-41	1.72505	1.24511e-36	down
LIMD2	4.80949e-20	2.96465	1.52663e-15	down
LIMK1	1.78464e-14	2.06498	5.66481e-10	down
LIMS2	3.31082e-25	2.61836	1.05092e-20	down
LIN7C	9.93774e-13	1.35186	3.15444e-08	down
LINGO2	1.40971e-16	1.30429	4.47469e-12	down
LIPA	7.37622e-25	1.87994	2.34136e-20	down
LIPG	3.37804e-45	2.20633	1.07226e-40	down
LIPM	1.18347e-15	2.08413	3.75658e-11	down
LITAF	3.91894e-12	2.57103	1.24395e-07	down
LLGL2	3.05313e-18	1.18013	9.69126e-14	down
LMAN1	1.55283e-16	1.38163	4.92901e-12	down
LMBR1	3.84195e-15	1.16743	1.21951e-10	down
LMBRD1	1.49502e-15	1.8707	4.7455e-11	down
LMBRD2	1.53162e-16	1.3408	4.86168e-12	down
LMCD1	1.37639e-14	2.29515	4.36895e-10	down
LMO1	4.18216e-16	3.33989	1.3275e-11	down
LMO4	2.38883e-28	2.62103	7.58264e-24	down
LMO7	6.00209e-07	1.47408	0.0190518	down
LMOD3	5.96772e-15	2.40629	1.89427e-10	down
LNPK	2.43154e-41	2.12247	7.7182e-37	down
LOC100423294	5.89963e-20	1.5288	1.87266e-15	down
LOC100423391	4.18626e-15	1.81813	1.3288e-10	down
LOC100423594	8.62826e-59	4.4188	2.73878e-54	down
LOC100423823	1.42911e-08	1.48875	0.000453627	down
LOC100424052	8.78376e-19	2.4594	2.78814e-14	down
LOC100424103	3.09813e-47	2.85026	9.83408e-43	down
LOC100424218	6.13707e-79	3.35868	1.94803e-74	down
LOC100424304	5.43358e-29	1.4738	1.72473e-24	down
LOC100424768	2.75607e-09	1.92676	8.7483e-05	down
LOC100424795	1.72168e-14	1.35656	5.46496e-10	down
LOC100424971	3.36502e-07	1.18806	0.0106812	down
LOC100425035	4.82812e-13	1.34722	1.53254e-08	down
LOC100425124	3.40934e-46	1.45378	1.08219e-41	down
LOC100425403	6.33538e-30	3.15479	2.01097e-25	down
LOC100425804	1.38613e-07	1.68324	0.00439986	down
LOC100425905	1.07103e-08	1.4049	0.000339965	down
LOC100425959	3.66222e-22	3.30397	1.16246e-17	down
LOC100426005	4.63718e-27	2.21302	1.47193e-22	down
LOC100426567	1.92368e-26	1.76203	6.10613e-22	down
LOC100426608	1.28956e-216	2.44739	4.09333e-212	down
LOC100426633	5.06805e-25	1.77386	1.6087e-20	down
LOC100427042	2.68335e-21	1.46811	8.51749e-17	down
LOC100427153	6.03786e-10	1.30584	1.91654e-05	down
LOC100427274	5.03502e-09	1.97112	0.000159822	down
LOC100427362	7.55522e-07	1.18773	0.0239818	down
LOC100427493	1.94166e-17	1.06316	6.16323e-13	down
LOC100427680	3.80527e-14	4.25261	1.20787e-09	down
LOC100427743	4.37545e-32	2.06242	1.38885e-27	down
LOC100427837	1.05407e-32	2.75814	3.34583e-28	down
LOC100427840	8.90748e-30	1.87933	2.82741e-25	down
LOC100427847	8.77856e-07	1.25978	0.0278649	down
LOC100427851	5.93634e-11	1.18271	1.88431e-06	down
LOC100428370	2.06794e-20	2.65754	6.56405e-16	down
LOC100428653	5.4003e-08	5.15366	0.00171416	down
LOC100428708	6.02485e-41	3.9306	1.91241e-36	down
LOC100428712	4.6429e-55	1.54458	1.47375e-50	down
LOC100428886	1.0221e-17	2.47916	3.24433e-13	down
LOC100429047	2.82679e-14	1.85686	8.97279e-10	down
LOC100429107	2.52168e-09	1.71115	8.00431e-05	down
LOC100429174	1.63473e-20	2.26849	5.18897e-16	down
LOC100429190	2.45987e-11	1.88871	7.80813e-07	down
LOC100429403	5.66452e-54	2.1739	1.79803e-49	down
LOC100429512	2.91558e-10	2.52789	9.25463e-06	down
LOC100429528	3.0879e-17	1.43789	9.8016e-13	down
LOC100429632	2.14658e-18	1.68603	6.81368e-14	down
LOC100429741	1.23763e-06	2.18268	0.0392847	down
LOC100429933	1.13018e-10	1.97563	3.58741e-06	down
LOC100430143	6.3339e-19	1.67004	2.01051e-14	down
LOC100430219	1.59713e-09	1.56987	5.06961e-05	down
LOC100430266	1.36015e-15	2.33373	4.3174e-11	down
LOC100430358	1.44317e-10	1.88923	4.5809e-06	down
LOC100430389	2.51199e-11	2.18263	7.97355e-07	down
LOC100430473	8.36393e-29	2.93466	2.65488e-24	down
LOC100430500	4.82337e-08	2.47916	0.00153103	down
LOC100430701	1.69079e-15	1.65052	5.36692e-11	down
LOC100430773	1.79048e-32	2.91421	5.68335e-28	down
LOC106992283	1.11069e-22	1.32174	3.52554e-18	down
LOC106992358	5.70566e-82	3.8931	1.81109e-77	down
LOC106992382	1.65326e-48	6.22003	5.24778e-44	down
LOC106992395	5.38315e-27	1.89677	1.70872e-22	down
LOC106992546	8.86346e-19	3.36883	2.81344e-14	down
LOC106992627	5.69235e-68	3.32731	1.80686e-63	down
LOC106992631	3.48731e-72	2.63592	1.10694e-67	down
LOC106992658	7.02138e-17	1.2742	2.22873e-12	down
LOC106992735	7.43003e-12	1.13168	2.35844e-07	down
LOC106992835	1.01262e-14	3.52698	3.21427e-10	down
LOC106992846	1.75673e-34	1.44123	5.57623e-30	down
LOC106992860	1.63562e-14	4.09771	5.19178e-10	down
LOC106992864	2.64015e-24	3.59199	8.38036e-20	down
LOC106993015	1.08851e-08	1.29686	0.000345516	down
LOC106993019	5.56679e-22	4.26595	1.76701e-17	down
LOC106993021	1.18689e-46	4.18879	3.76743e-42	down
LOC106993025	6.7451e-49	2.49215	2.14103e-44	down
LOC106993133	1.46777e-18	1.62064	4.65898e-14	down
LOC106993209	5.97866e-32	1.91065	1.89775e-27	down
LOC106993212	3.00508e-13	1.52099	9.53874e-09	down
LOC106993224	1.00491e-27	2.28681	3.18978e-23	down
LOC106993226	2.49062e-23	1.62559	7.90573e-19	down
LOC106993227	8.97608e-30	3.99296	2.84919e-25	down
LOC106993228	5.66573e-35	2.94122	1.79841e-30	down
LOC106993238	3.95866e-07	1.81767	0.0125656	down
LOC106993276	1.7544e-17	3.24418	5.5688e-13	down
LOC106993307	4.45112e-14	1.71097	1.41287e-09	down
LOC106993310	1.84135e-18	1.74037	5.8448e-14	down
LOC106993343	3.05621e-16	3.45583	9.70103e-12	down
LOC106993384	9.38786e-19	2.50739	2.97989e-14	down
LOC106993424	1.72457e-51	4.93127	5.47414e-47	down
LOC106993426	1.10415e-39	5.06751	3.50478e-35	down
LOC106993475	1.90054e-11	1.70085	6.03268e-07	down
LOC106993544	1.31681e-14	1.911	4.17981e-10	down
LOC106993580	1.41048e-11	1.46589	4.47715e-07	down
LOC106993705	4.38046e-12	2.62396	1.39045e-07	down
LOC106993748	8.44224e-08	1.7226	0.00267974	down
LOC106993776	1.49631e-16	1.43601	4.74958e-12	down
LOC106993809	7.01835e-11	2.50935	2.22776e-06	down
LOC106993857	1.07209e-07	1.01843	0.00340304	down
LOC106993875	1.84711e-17	1.79499	5.86309e-13	down
LOC106993906	8.94631e-39	3.00664	2.83974e-34	down
LOC106993955	5.22951e-46	3.65457	1.65995e-41	down
LOC106994025	4.46964e-19	1.56405	1.41875e-14	down
LOC106994031	1.75139e-28	2.69831	5.55925e-24	down
LOC106994032	9.32334e-17	1.80149	2.95941e-12	down
LOC106994069	7.73137e-17	3.57449	2.45409e-12	down
LOC106994117	2.17167e-160	1.82402	6.89333e-156	down
LOC106994120	2.33711e-35	1.6907	7.41846e-31	down
LOC106994123	2.18468e-74	2.92886	6.93462e-70	down
LOC106994131	5.93289e-11	1.33172	1.88322e-06	down
LOC106994169	1.53183e-08	1.43603	0.000486234	down
LOC106994171	1.4159e-88	2.78645	4.49434e-84	down
LOC106994178	5.37112e-33	1.0292	1.7049e-28	down
LOC106994204	5.7386e-78	3.71447	1.82155e-73	down
LOC106994230	2.77181e-12	1.49949	8.79829e-08	down
LOC106994257	1.71626e-68	3.77531	5.44774e-64	down
LOC106994282	1.50057e-43	2.99849	4.7631e-39	down
LOC106994294	9.23848e-61	1.63431	2.93248e-56	down
LOC106994313	1.52009e-11	2.03328	4.82506e-07	down
LOC106994319	3.40338e-59	4.65103	1.0803e-54	down
LOC106994331	2.34049e-10	3.14134	7.42918e-06	down
LOC106994341	6.9221e-18	1.7812	2.19721e-13	down
LOC106994346	1.09683e-07	3.16127	0.00348156	down
LOC106994373	1.67402e-66	2.51872	5.31367e-62	down
LOC106994381	1.2127e-27	3.75158	3.84935e-23	down
LOC106994385	1.31559e-60	3.62642	4.17595e-56	down
LOC106994392	3.385e-20	3.97759	1.07447e-15	down
LOC106994393	1.04025e-30	1.71547	3.30196e-26	down
LOC106994418	4.56499e-51	2.63369	1.44902e-46	down
LOC106994438	2.26487e-15	2.66618	7.18915e-11	down
LOC106994471	4.20011e-07	2.14819	0.013332	down
LOC106994475	1.42128e-07	1.27116	0.00451142	down
LOC106994481	4.7947e-36	2.22538	1.52193e-31	down
LOC106994488	1.16091e-21	2.47113	3.68495e-17	down
LOC106994494	9.90355e-39	2.26181	3.14358e-34	down
LOC106994547	4.76312e-27	3.31369	1.51191e-22	down
LOC106994555	2.78829e-26	2.50646	8.85061e-22	down
LOC106994590	2.39739e-32	1.98426	7.60981e-28	down
LOC106994612	7.86254e-07	1.54534	0.0249573	down
LOC106994640	1.1614e-23	1.23309	3.68651e-19	down
LOC106994695	6.59457e-24	1.68708	2.09325e-19	down
LOC106994717	1.03435e-83	3.56286	3.28323e-79	down
LOC106994764	2.98765e-20	1.38477	9.48339e-16	down
LOC106994772	2.61503e-36	2.07803	8.30064e-32	down
LOC106994786	2.87242e-32	3.32199	9.11765e-28	down
LOC106994791	2.93927e-08	1.52456	0.000932982	down
LOC106994809	2.01368e-24	1.97998	6.39181e-20	down
LOC106994823	6.10211e-21	1.75539	1.93693e-16	down
LOC106994824	1.13988e-08	2.24676	0.000361822	down
LOC106994869	3.08127e-20	3.16201	9.78058e-16	down
LOC106994870	1.22328e-28	3.69967	3.88294e-24	down
LOC106994901	7.32591e-10	2.43958	2.32539e-05	down
LOC106994910	1.78765e-23	1.91066	5.67437e-19	down
LOC106994941	2.03961e-35	2.61511	6.47414e-31	down
LOC106994945	7.64569e-14	1.58905	2.4269e-09	down
LOC106994953	2.11723e-31	3.60893	6.7205e-27	down
LOC106994980	3.74252e-19	1.32441	1.18795e-14	down
LOC106994986	8.01146e-07	1.48995	0.02543	down
LOC106995048	4.34618e-08	2.09935	0.00137956	down
LOC106995085	9.06438e-07	2.23507	0.0287721	down
LOC106995105	6.74345e-49	2.42883	2.14051e-44	down
LOC106995114	5.24138e-19	1.53751	1.66372e-14	down
LOC106995143	1.46919e-07	1.12984	0.0046635	down
LOC106995206	2.44098e-17	1.31354	7.74817e-13	down
LOC106995316	8.00507e-33	1.94415	2.54097e-28	down
LOC106995351	2.45743e-19	2.13146	7.80037e-15	down
LOC106995501	2.21995e-38	2.96549	7.04658e-34	down
LOC106995573	2.5538e-50	2.53871	8.10627e-46	down
LOC106995580	2.4071e-16	1.29921	7.64062e-12	down
LOC106995606	1.67419e-49	2.48781	5.31421e-45	down
LOC106995627	1.22615e-14	3.12676	3.89204e-10	down
LOC106995630	1.53591e-16	2.82277	4.87529e-12	down
LOC106995639	9.82094e-35	3.62239	3.11736e-30	down
LOC106995676	1.6473e-17	1.86173	5.22885e-13	down
LOC106995677	4.46697e-40	8.10321	1.4179e-35	down
LOC106995707	2.366e-31	3.24518	7.51017e-27	down
LOC106995708	2.92441e-68	4.5971	9.28266e-64	down
LOC106995727	4.9073e-54	1.99485	1.55767e-49	down
LOC106995785	2.33986e-13	1.06072	7.42717e-09	down
LOC106995887	2.59299e-54	1.68298	8.23066e-50	down
LOC106995911	8.01372e-10	1.11783	2.54371e-05	down
LOC106995979	3.8626e-21	1.27681	1.22607e-16	down
LOC106995987	7.43285e-22	1.11391	2.35933e-17	down
LOC106996033	2.07023e-50	4.0818	6.57132e-46	down
LOC106996100	1.42102e-08	1.07083	0.000451061	down
LOC106996149	2.78478e-41	3.21317	8.83945e-37	down
LOC106996153	5.47521e-65	4.77868	1.73794e-60	down
LOC106996242	2.85744e-20	2.33557	9.07007e-16	down
LOC106996277	1.37395e-56	4.23236	4.36118e-52	down
LOC106996343	4.11993e-39	1.93519	1.30775e-34	down
LOC106996398	1.57966e-26	2.01185	5.01414e-22	down
LOC106996410	5.41947e-31	3.40788	1.72025e-26	down
LOC106996415	7.5634e-14	1.48158	2.40078e-09	down
LOC106996472	3.06183e-07	1.2126	0.00971885	down
LOC106996503	1.65627e-43	3.81154	5.25732e-39	down
LOC106996565	1.55501e-18	2.01412	4.9359e-14	down
LOC106996572	9.48424e-13	1.58446	3.01049e-08	down
LOC106996630	2.46509e-13	1.10597	7.8247e-09	down
LOC106996686	2.79075e-49	3.3474	8.85838e-45	down
LOC106996730	4.93386e-36	3.26259	1.5661e-31	down
LOC106996741	5.47454e-45	3.07748	1.73773e-40	down
LOC106996843	2.10528e-29	2.32727	6.68258e-25	down
LOC106996859	2.90247e-54	4.40754	9.21301e-50	down
LOC106996868	3.96894e-13	2.74878	1.25982e-08	down
LOC106996871	1.69883e-38	2.58027	5.39243e-34	down
LOC106996887	1.62961e-80	3.17069	5.17271e-76	down
LOC106996992	5.64423e-20	2.36139	1.79159e-15	down
LOC106997009	5.29406e-22	3.35006	1.68044e-17	down
LOC106997094	8.50653e-35	2.01317	2.70014e-30	down
LOC106997169	3.65371e-62	5.70332	1.15976e-57	down
LOC106997181	6.40242e-11	1.38132	2.03226e-06	down
LOC106997203	1.21225e-08	1.57677	0.000384792	down
LOC106997235	1.17564e-35	3.08558	3.7317e-31	down
LOC106997267	7.17949e-58	4.75052	2.27891e-53	down
LOC106997278	2.78943e-31	4.168	8.85421e-27	down
LOC106997286	1.98946e-09	2.85841	6.31495e-05	down
LOC106997295	3.95493e-25	2.19144	1.25537e-20	down
LOC106997299	4.05938e-25	2.35239	1.28853e-20	down
LOC106997333	2.59196e-34	3.69471	8.2274e-30	down
LOC106997411	4.80256e-09	1.4872	0.000152443	down
LOC106997517	1.43615e-59	4.11547	4.55861e-55	down
LOC106997565	1.38637e-32	1.49595	4.40062e-28	down
LOC106997582	4.02393e-36	3.07031	1.27728e-31	down
LOC106997596	1.90799e-31	3.65716	6.05634e-27	down
LOC106997621	2.06034e-31	1.0078	6.53992e-27	down
LOC106997658	4.31958e-19	1.50161	1.37112e-14	down
LOC106997680	6.68845e-27	1.63216	2.12305e-22	down
LOC106997735	7.48647e-27	3.12548	2.37635e-22	down
LOC106997747	5.45222e-13	1.8845	1.73064e-08	down
LOC106997799	1.6086e-20	1.35228	5.10601e-16	down
LOC106997839	6.23128e-35	1.3415	1.97793e-30	down
LOC106997935	9.12739e-45	2.20545	2.89722e-40	down
LOC106997972	8.93254e-22	3.0073	2.83537e-17	down
LOC106998005	4.44592e-60	2.58886	1.41122e-55	down
LOC106998043	6.60748e-33	2.29295	2.09735e-28	down
LOC106998044	2.72739e-17	2.20534	8.65728e-13	down
LOC106998055	1.91989e-17	2.02779	6.09412e-13	down
LOC106998062	6.11886e-32	2.33695	1.94225e-27	down
LOC106998188	1.00104e-09	1.51247	3.17749e-05	down
LOC106998198	3.88982e-16	1.72774	1.23471e-11	down
LOC106998199	4.19949e-35	1.87971	1.333e-30	down
LOC106998201	4.70158e-15	1.96109	1.49237e-10	down
LOC106998310	7.39191e-13	1.71908	2.34634e-08	down
LOC106998320	2.65015e-11	1.34954	8.4121e-07	down
LOC106998401	3.25317e-11	1.41681	1.03262e-06	down
LOC106998434	1.04568e-20	2.04426	3.3192e-16	down
LOC106998502	5.83976e-24	2.42206	1.85366e-19	down
LOC106998506	7.74314e-09	1.17252	0.000245783	down
LOC106998533	4.42315e-07	2.08494	0.0140399	down
LOC106998545	2.33291e-08	1.76364	0.000740512	down
LOC106998581	1.00929e-21	1.57995	3.2037e-17	down
LOC106998584	1.73879e-10	1.7855	5.51927e-06	down
LOC106998587	1.9846e-30	3.78883	6.29953e-26	down
LOC106998609	3.17319e-12	3.0758	1.00723e-07	down
LOC106998645	9.50162e-09	1.89437	0.0003016	down
LOC106998648	1.73312e-85	1.81467	5.50128e-81	down
LOC106998659	1.21274e-27	3.22784	3.84948e-23	down
LOC106998662	1.3961e-10	2.25594	4.43151e-06	down
LOC106998668	1.80178e-33	1.55343	5.71923e-29	down
LOC106998673	6.34161e-39	4.17448	2.01295e-34	down
LOC106998738	1.02532e-19	2.97818	3.25458e-15	down
LOC106998750	3.0179e-09	1.96018	9.57943e-05	down
LOC106998775	2.34846e-12	2.12116	7.45449e-08	down
LOC106998860	2.88955e-41	1.79795	9.17201e-37	down
LOC106998863	7.30682e-20	2.55879	2.31933e-15	down
LOC106998878	3.83221e-34	2.50827	1.21642e-29	down
LOC106998958	1.47834e-09	1.07418	4.69253e-05	down
LOC106998961	4.90804e-17	1.53021	1.55791e-12	down
LOC106998968	4.13468e-26	1.3818	1.31243e-21	down
LOC106998978	1.5233e-38	4.44842	4.83524e-34	down
LOC106999008	7.20684e-29	1.50101	2.2876e-24	down
LOC106999011	4.37814e-10	1.91903	1.38971e-05	down
LOC106999016	1.49856e-61	2.05861	4.75673e-57	down
LOC106999058	3.26238e-10	1.62861	1.03554e-05	down
LOC106999065	2.46882e-19	1.59807	7.83652e-15	down
LOC106999069	6.28156e-14	2.25024	1.99389e-09	down
LOC106999090	1.48007e-18	1.79862	4.69803e-14	down
LOC106999101	1.2802e-34	1.98191	4.0636e-30	down
LOC106999127	6.12002e-20	2.41604	1.94262e-15	down
LOC106999148	8.09168e-07	2.06372	0.0256846	down
LOC106999161	6.41583e-20	3.43876	2.03651e-15	down
LOC106999209	8.12534e-16	2.00474	2.57914e-11	down
LOC106999250	4.15491e-22	2.42848	1.31885e-17	down
LOC106999271	3.77312e-49	2.84255	1.19766e-44	down
LOC106999355	4.88195e-22	1.84057	1.54963e-17	down
LOC106999357	2.17422e-07	1.17773	0.0069014	down
LOC106999401	3.56634e-64	2.45609	1.13203e-59	down
LOC106999421	2.14848e-11	2.21284	6.8197e-07	down
LOC106999504	2.77938e-37	1.74331	8.8223e-33	down
LOC106999547	1.64693e-59	1.79737	5.22768e-55	down
LOC106999549	2.52185e-10	1.46269	8.00486e-06	down
LOC106999574	8.81441e-25	1.57828	2.79787e-20	down
LOC106999609	1.55468e-08	2.52196	0.000493486	down
LOC106999670	2.0429e-22	3.06008	6.48456e-18	down
LOC106999679	1.82688e-40	3.13508	5.79887e-36	down
LOC106999705	3.0803e-11	1.7688	9.7775e-07	down
LOC106999711	1.20369e-25	2.96953	3.82075e-21	down
LOC106999725	1.43319e-15	2.27936	4.54922e-11	down
LOC106999758	9.29054e-12	1.91021	2.949e-07	down
LOC106999829	1.35533e-30	4.25751	4.3021e-26	down
LOC106999853	3.05543e-41	2.44615	9.69855e-37	down
LOC106999860	1.31329e-13	2.52976	4.16865e-09	down
LOC106999942	1.31413e-75	2.08704	4.17132e-71	down
LOC106999943	1.1211e-40	1.38191	3.55859e-36	down
LOC106999955	2.05257e-09	1.91283	6.51528e-05	down
LOC107000046	4.23353e-16	1.71011	1.34381e-11	down
LOC107000083	2.33816e-08	2.12552	0.00074218	down
LOC107000088	2.61111e-19	3.24506	8.28818e-15	down
LOC107000138	1.40705e-22	1.66095	4.46626e-18	down
LOC107000160	6.29978e-18	1.59354	1.99967e-13	down
LOC107000204	1.18012e-18	2.07887	3.74594e-14	down
LOC107000323	5.55381e-09	2.40082	0.000176289	down
LOC107000343	4.90128e-21	2.70604	1.55577e-16	down
LOC107000344	1.41662e-16	2.6308	4.49663e-12	down
LOC107000357	2.39617e-07	1.69966	0.00760594	down
LOC107000378	4.49644e-18	1.59331	1.42726e-13	down
LOC107000395	6.63032e-09	1.61616	0.00021046	down
LOC107000414	1.31545e-21	1.29301	4.17552e-17	down
LOC107000452	2.77376e-12	1.9112	8.80447e-08	down
LOC107000659	1.94304e-19	1.04149	6.16759e-15	down
LOC107000677	1.06955e-11	1.728	3.39497e-07	down
LOC107000705	1.76889e-08	2.42651	0.00056148	down
LOC107000717	2.12954e-20	1.99591	6.75958e-16	down
LOC107000770	1.40524e-45	2.65286	4.46051e-41	down
LOC107000783	3.89e-36	1.33286	1.23476e-31	down
LOC107000814	1.27065e-21	1.41479	4.0333e-17	down
LOC107000817	6.80962e-46	4.18302	2.16151e-41	down
LOC107000868	5.969e-79	1.90543	1.89468e-74	down
LOC107000920	2.28267e-40	3.71757	7.24564e-36	down
LOC107000942	1.96953e-43	3.44268	6.25167e-39	down
LOC107000967	6.54726e-07	4.05357	0.0207823	down
LOC107000976	1.18735e-40	1.20153	3.7689e-36	down
LOC107000979	6.30156e-29	2.31352	2.00024e-24	down
LOC107000998	1.96043e-16	1.09625	6.2228e-12	down
LOC107001006	1.03441e-22	2.50463	3.28341e-18	down
LOC107001045	4.01391e-37	3.44726	1.2741e-32	down
LOC109910386	2.13646e-07	1.85204	0.00678155	down
LOC114669717	6.10708e-28	1.1479	1.93851e-23	down
LOC114669724	3.18668e-18	2.10208	1.01152e-13	down
LOC114669760	1.41376e-32	2.47425	4.48754e-28	down
LOC114669767	3.81677e-14	2.50134	1.21152e-09	down
LOC114669790	3.16361e-11	1.98052	1.00419e-06	down
LOC114669830	3.72933e-28	1.82035	1.18376e-23	down
LOC114669852	1.20804e-11	1.37784	3.83456e-07	down
LOC114669856	8.59946e-11	1.7269	2.72964e-06	down
LOC114669869	1.30912e-29	3.06683	4.15542e-25	down
LOC114669907	2.68317e-22	2.05051	8.51691e-18	down
LOC114669957	1.23352e-11	2.42746	3.91543e-07	down
LOC114670022	7.75923e-27	1.38048	2.46294e-22	down
LOC114670049	1.7875e-21	1.93911	5.67389e-17	down
LOC114670057	4.39816e-09	2.32937	0.000139607	down
LOC114670059	1.08426e-11	1.86907	3.44164e-07	down
LOC114670064	2.13901e-10	1.48725	6.78965e-06	down
LOC114670139	1.18764e-12	2.66714	3.76979e-08	down
LOC114670228	5.13313e-07	1.4359	0.0162936	down
LOC114670320	1.28213e-24	1.42941	4.06975e-20	down
LOC114670342	3.03227e-30	2.93814	9.62504e-26	down
LOC114670367	1.14652e-08	1.64223	0.000363928	down
LOC114670370	1.84656e-08	1.57721	0.000586135	down
LOC114670385	3.59426e-24	1.93753	1.14089e-19	down
LOC114670414	2.18437e-43	2.90899	6.93363e-39	down
LOC114670434	1.97754e-07	1.64323	0.00627709	down
LOC114670445	8.13305e-15	2.69423	2.58159e-10	down
LOC114670450	1.40723e-47	2.1506	4.46682e-43	down
LOC114670497	2.88739e-24	2.09959	9.16516e-20	down
LOC114670499	2.5302e-09	1.75715	8.03136e-05	down
LOC114670543	2.45264e-10	1.45735	7.78516e-06	down
LOC114670544	2.48413e-18	5.08984	7.88512e-14	down
LOC114670545	7.48386e-26	1.73181	2.37553e-21	down
LOC114670553	9.56565e-16	1.19046	3.03633e-11	down
LOC114670559	9.1409e-08	2.39389	0.0029015	down
LOC114670565	4.84056e-29	3.30397	1.53649e-24	down
LOC114670579	7.71627e-09	1.6679	0.00024493	down
LOC114670691	2.72796e-09	3.34979	8.65908e-05	down
LOC114670768	3.4843e-23	2.86087	1.10599e-18	down
LOC114670778	3.45222e-77	3.72725	1.0958e-72	down
LOC114670785	3.24108e-14	3.74353	1.02878e-09	down
LOC114670787	9.60085e-63	3.1489	3.0475e-58	down
LOC114670792	9.36423e-18	1.99915	2.97239e-13	down
LOC114670804	3.7761e-63	3.36004	1.19861e-58	down
LOC114670813	3.87007e-50	3.25248	1.22844e-45	down
LOC114670845	6.07141e-09	1.02943	0.000192719	down
LOC114670854	5.15764e-12	1.66566	1.63714e-07	down
LOC114670858	4.91357e-08	1.29154	0.00155967	down
LOC114670864	7.77958e-58	1.76375	2.46939e-53	down
LOC114670878	2.78637e-15	1.90462	8.84449e-11	down
LOC114670882	2.34317e-24	2.43429	7.43768e-20	down
LOC114670885	1.09865e-14	2.16059	3.48733e-10	down
LOC114670946	4.49893e-08	1.10795	0.00142805	down
LOC114670978	4.62846e-07	2.1402	0.0146916	down
LOC114670983	2.91914e-41	2.41589	9.26595e-37	down
LOC114670987	3.29471e-07	1.58654	0.0104581	down
LOC114670991	9.2271e-13	2.18297	2.92887e-08	down
LOC114670998	1.07881e-24	2.47734	3.42435e-20	down
LOC114671003	5.55243e-34	1.49164	1.76245e-29	down
LOC114671043	1.54148e-06	1.15772	0.0489297	down
LOC114671066	2.22984e-20	4.37131	7.07795e-16	down
LOC114671067	1.11194e-11	3.368	3.52953e-07	down
LOC114671083	7.57198e-14	3.32752	2.4035e-09	down
LOC114671231	7.51849e-09	3.38289	0.000238652	down
LOC114671291	3.56508e-09	2.79608	0.000113163	down
LOC114671393	4.94684e-16	1.70766	1.57023e-11	down
LOC114671412	1.23571e-10	1.61929	3.92239e-06	down
LOC114671418	3.47619e-17	2.06668	1.10341e-12	down
LOC114671488	1.00714e-41	2.87903	3.19686e-37	down
LOC114671504	6.22733e-09	1.72402	0.000197668	down
LOC114671517	4.90076e-11	2.54347	1.5556e-06	down
LOC114671677	1.37573e-11	2.78758	4.36683e-07	down
LOC114671705	1.70441e-19	2.22145	5.41014e-15	down
LOC114671733	5.06405e-68	4.54907	1.60743e-63	down
LOC114671760	6.49834e-27	3.31078	2.0627e-22	down
LOC114671767	5.77375e-123	3.28047	1.8327e-118	down
LOC114671777	6.81347e-47	1.9664	2.16273e-42	down
LOC114671789	5.10258e-13	2.71115	1.61966e-08	down
LOC114671869	1.28578e-28	4.27917	4.08131e-24	down
LOC114671897	1.12115e-42	3.58564	3.55876e-38	down
LOC114671901	5.65558e-21	2.63199	1.79519e-16	down
LOC114671907	2.59036e-15	2.63342	8.22231e-11	down
LOC114671914	1.45253e-12	2.38922	4.61061e-08	down
LOC114671957	2.71306e-18	2.36217	8.6118e-14	down
LOC114672112	4.18053e-10	3.25477	1.32698e-05	down
LOC114672124	5.0735e-15	1.91676	1.61043e-10	down
LOC114672161	2.47049e-09	1.47439	7.84183e-05	down
LOC114672194	3.32834e-12	1.12904	1.05648e-07	down
LOC114672221	7.43005e-130	2.2645	2.35845e-125	down
LOC114672232	4.70399e-12	1.02682	1.49314e-07	down
LOC114672245	1.98804e-20	1.93536	6.31043e-16	down
LOC114672251	9.16212e-57	3.4058	2.90824e-52	down
LOC114672256	3.64249e-82	1.71998	1.1562e-77	down
LOC114672259	1.11833e-26	2.38433	3.54981e-22	down
LOC114672260	7.78229e-49	2.2724	2.47026e-44	down
LOC114672263	1.51637e-14	1.24645	4.81326e-10	down
LOC114672264	3.10207e-11	1.23535	9.8466e-07	down
LOC114672324	3.5251e-24	1.71436	1.11894e-19	down
LOC114672333	7.19985e-21	3.81784	2.28538e-16	down
LOC114672366	1.03516e-34	1.23885	3.28581e-30	down
LOC114672380	1.95902e-133	1.74732	6.21833e-129	down
LOC114672408	4.53849e-07	2.02358	0.0144061	down
LOC114672410	2.44466e-08	1.69741	0.000775983	down
LOC114672429	2.29717e-37	1.63165	7.29168e-33	down
LOC114672447	1.58852e-17	2.71508	5.04228e-13	down
LOC114672615	3.95043e-120	1.75342	1.25395e-115	down
LOC114672632	1.81615e-39	5.18675	5.76482e-35	down
LOC114672677	2.1485e-14	3.50907	6.81976e-10	down
LOC114672685	2.47129e-42	2.78954	7.84438e-38	down
LOC114672701	1.95057e-65	3.27681	6.19149e-61	down
LOC114672705	1.17991e-45	3.50058	3.74528e-41	down
LOC114672710	3.30986e-37	2.87579	1.05062e-32	down
LOC114672760	1.20753e-18	3.66161	3.83295e-14	down
LOC114672771	2.982e-19	1.91448	9.46548e-15	down
LOC114672778	1.35153e-17	2.83758	4.29002e-13	down
LOC114672813	5.0293e-47	2.31904	1.5964e-42	down
LOC114672847	5.78139e-97	2.67145	1.83513e-92	down
LOC114672856	2.11044e-36	3.78967	6.69895e-32	down
LOC114672998	7.72191e-12	2.13958	2.45109e-07	down
LOC114673011	6.35185e-28	1.23942	2.0162e-23	down
LOC114673045	3.27629e-10	1.77962	1.03996e-05	down
LOC114673048	1.91809e-17	1.90167	6.08842e-13	down
LOC114673050	3.08326e-29	3.83169	9.78687e-25	down
LOC114673052	5.5314e-59	1.88706	1.75578e-54	down
LOC114673053	3.12248e-56	3.00164	9.91139e-52	down
LOC114673090	6.1429e-30	1.60256	1.94988e-25	down
LOC114673125	1.57383e-13	2.35181	4.99564e-09	down
LOC114673128	1.70962e-14	1.47923	5.42668e-10	down
LOC114673155	2.73903e-09	1.45114	8.69424e-05	down
LOC114673167	4.38821e-15	3.91407	1.39291e-10	down
[truncated: 4,295 more rows]

## Sheet: GO enrichment of O8C up genes
GO enrichment of upregulated genes in O8C
Category	Term	Count	%	P-value	Genes
GOTERM_BP_DIRECT	GO:0006412~translation	104	4.91029	2.17227e-28	RPL4, RPL3, RPL31, RPL34, LOC114675582, RPL10A, LOC114669857, RPL9, RPL6, RPS15, RPL18A, RPL36AL, RPL35, LOC702723, RPL38, RPL37, RPL39, LOC107000809, RPS13, LOC703919, RPL21, RPS8, RPL23, RPL22, MRPS18A, LOC107000401, RPSA, MRPS18C, LOC712987, GUF1, LOC702677, RPL27, RPL26, RPS4Y2, LOC711174, MRPL16, MRPL14, MRPL15, RPS4Y1, MRPL12, LOC712820, MRPL11, LOC693573, MRPL20, LOC704365, LOC704083, TXND…
GOTERM_BP_DIRECT	GO:0006364~rRNA processing	49	2.3135	8.4069e-24	DDX49, NVL, POP4, RRP1, PPAN, RRP9, RPS15, FBL, LOC708660, RRP15, UTP15, WDR36, UTP11, DIS3, WDR74, IMP4, UTP18, REXO4, EBNA1BP2, NSA2, MRTO4, C1D, NHP2, RPL27, UTP25, AK6, RBFA, RPF1, NOL6, RRP7A, EXOSC5, EXOSC4, PDCD11, EXOSC8, UTP20, BRIX1, EXOSC2, NOP14, WDR18, RRP1B, BYSL, WDR55, BOP1, TBL3, LAS1L, TSR2, MPHOSPH10, PIN4, NOP10
GOTERM_BP_DIRECT	GO:0002181~cytoplasmic translation	32	1.51086	1.05985e-12	RPL31, LOC708140, RPLP0, LOC720748, LOC698792, LOC697065, RPL10A, RPL9, LOC696134, RPL6, LOC114677128, LOC701691, LOC704083, LOC702723, RPL38, LOC107000809, LOC106996346, RPL17, RPL39, ZC3H15, LOC716530, RPL22, LOC107000401, RPSA, FTSJ1, LOC706496, RPS29, DRG2, RPL22L1, RPL26, RPL26L1, LOC704510
GOTERM_BP_DIRECT	GO:0042273~ribosomal large subunit biogenesis	21	0.991501	4.16335e-11	NPM1, NVL, NIP7, WDR74, GTF3A, LOC114676394, LOC114669857, NOC2L, LOC696134, TMA16, NLE1, GTPBP4, EBNA1BP2, EIF6, MRTO4, CINP, RPL14, SURF6, RPL26, RSL24D1, RPL26L1
GOTERM_BP_DIRECT	GO:0042274~ribosomal small subunit biogenesis	22	1.03872	7.2161e-11	UTP15, NPM1, NOP58, UTP11, DIMT1, WDR3, LOC114676394, DNTTIP2, C1H1ORF131, IMP4, AK6, AATF, UTP18, NOL6, RRP9, FBL, EMG1, NOB1, MPHOSPH10, SURF6, UTP20, RPS13
GOTERM_BP_DIRECT	GO:0001732~formation of cytoplasmic translation initiation complex	13	0.613787	1.30576e-10	LOC705696, EIF3M, EIF5, EIF3K, EIF3L, EIF3I, EIF3J, EIF3G, EIF3E, EIF3F, EIF3D, EIF3A, EIF3B
GOTERM_BP_DIRECT	GO:0032981~mitochondrial respiratory chain complex I assembly	23	1.08593	3.28371e-09	NDUFB9, NDUFB7, TIMMDC1, DMAC1, NDUFA5, NDUFA12, NUBPL, NDUFB4, NDUFA2, ACAD9, NDUFB3, NDUFA1, NDUFC2, BCS1L, FOXRED1, LOC114675522, OXA1L, NDUFS8, NDUFS5, NDUFAF5, TMEM126A, NDUFS3, TMEM126B
GOTERM_BP_DIRECT	GO:0006457~protein folding	32	1.51086	1.14225e-07	ARL2, LOC100430373, DNAJC25, HSPD1, LOC693438, CCT7, CD300LG, CCT5, NKTR, TXNDC5, CCT4, CCT3, MKKS, NUDC, PPIL1, DNAJB13, CLPX, PDIA4, CCT6A, PDCL3, LOC707924, DNAJA3, CDC37, CANX, TCP1, PTGES3L, PPIE, PFDN2, PFDN4, PPIA, PFDN6, PPID
GOTERM_BP_DIRECT	GO:0042254~ribosome biogenesis	19	0.897073	2.2292e-07	NOP58, NVL, NOP2, RPLP0, GTF3A, URB2, SNU13, NOC4L, WDR12, GTPBP4, CUL4A, DHX30, BOP1, GRWD1, TSR1, RBIS, RSL24D1, GLUL, NOP10
GOTERM_BP_DIRECT	GO:0006397~mRNA processing	36	1.69972	5.94904e-07	RBM8A, DDX46, DDX1, FMR1, LOC114680234, CASC3, PTBP1, PUF60, SNRPD2, DHX15, ARL6IP4, ZNF326, RBM39, CPSF7, PTCD2, CPSF6, NSUN2, SSU72, LARP7, LSM5, SRRM1, PTBP3, HNRNPL, PRPF4, HNRNPM, PRPF39, SNRNP40, HNRNPK, HNRNPF, TRMT6, PABPC1, TARDBP, TRMT61A, RBM24, DUS3L, SUGP1
GOTERM_BP_DIRECT	GO:0032543~mitochondrial translation	13	0.613787	2.77683e-06	MRPS17, MRPS35, FASTKD2, MRPS34, MRPL16, GATC, GATB, MRPS18A, MRPL47, LOC718712, MRPL23, MRPS18C, CHCHD1
GOTERM_BP_DIRECT	GO:0008033~tRNA processing	16	0.75543	3.58492e-06	TP53RK, POP1, PRORP, RPP30, DDX1, WDR4, TPRKB, ZBTB8OS, ELP3, MTO1, TSEN54, WDR6, TRMT11, DUS4L, LOC703026, DUS3L
GOTERM_BP_DIRECT	GO:1904851~positive regulation of establishment of protein localization to telomere	7	0.3305	3.98269e-06	CCT6A, CCT3, TCP1, CCT7, CCT5, WRAP53, CCT4
GOTERM_BP_DIRECT	GO:0000460~maturation of 5.8S rRNA	9	0.424929	4.40456e-06	NSA2, EXOSC4, LAS1L, EIF6, PRKDC, C1D, RRP15, RPF1, MPHOSPH6
GOTERM_BP_DIRECT	GO:0008380~RNA splicing	27	1.27479	4.95863e-06	RBM8A, DDX46, FMR1, LOC114680234, CASC3, CCAR2, PTBP1, PUF60, SNRPD2, DHX15, ARL6IP4, ZNF326, IVNS1ABP, HSPA8, YJU2, LARP7, MAGOHB, LSM5, SRRM1, PRPF4, PRPF39, SNRNP40, HNRNPK, HNRNPF, TARDBP, RBM24, SUGP1
GOTERM_BP_DIRECT	GO:0006177~GMP biosynthetic process	8	0.377715	1.34289e-05	ADSL, LOC698764, IMPDH1, IMPDH2, PPAT, GMPS, GART, PFAS
GOTERM_BP_DIRECT	GO:0033617~mitochondrial cytochrome c oxidase assembly	13	0.613787	1.45144e-05	CCDC56, COX16, PET100, TACO1, FASTKD3, COX17, BCS1L, PET117, OXA1L, LOC695732, COX14, SMIM20, COA5
GOTERM_BP_DIRECT	GO:0000462~maturation of SSU-rRNA from tricistronic rRNA transcript (SSU-rRNA, 5.8S rRNA, LSU-rRNA)	13	0.613787	2.08972e-05	UTP25, UTP6, UTP4, RPS8, MRPS11, PWP2, WDR46, GTF2H5, WDR43, BYSL, TSR2, DHX37, TSR1
GOTERM_BP_DIRECT	GO:0036503~ERAD pathway	20	0.944287	3.71561e-05	HSPA5, CCDC47, FBXO17, FAF2, DNAJB12, DERL1, UBE4A, UBE2G2, AUP1, RNF5, OS9, JKAMP, CANX, DNAJB9, UFD1, ANKZF1, RNF121, GET4, UBQLN2
GOTERM_BP_DIRECT	GO:0000028~ribosomal small subunit assembly	14	0.661001	6.74718e-05	MRPS11, LOC708140, LOC720748, LOC698792, LOC697065, RPSA, MRPS7, PWP2, RPS15, RRP7A, LOC701691, LOC114677128, LOC106996346, LOC100425072
GOTERM_BP_DIRECT	GO:0002183~cytoplasmic translational initiation	7	0.3305	9.34407e-05	EIF2B5, EIF4A1, EIF3M, EIF2B3, EIF2B2, EIF3I, LOC695050
GOTERM_BP_DIRECT	GO:0000463~maturation of LSU-rRNA from tricistronic rRNA transcript (SSU-rRNA, 5.8S rRNA, LSU-rRNA)	10	0.472144	0.000118396	LOC701250, BOP1, RPL7L1, RPL35, RPF2, RBM34, WDR12, GTPBP4, FTSJ3, RPL7
GOTERM_BP_DIRECT	GO:0006390~mitochondrial transcription	6	0.283286	0.000119989	TWNK, MTERF4, POLRMT, MRPL12, PPARGC1B, TEFM
GOTERM_BP_DIRECT	GO:0015986~proton motive force-driven ATP synthesis	10	0.472144	0.000173963	LOC699117, ATP5PD, ATP5PB, ATP5MC3, ATP5F1D, ATP5MG, LOC707476, ATP5MC1, ATP5ME, LOC696144
GOTERM_BP_DIRECT	GO:0007005~mitochondrion organization	22	1.03872	0.000174215	LOC717595, PTCD2, CXADR, PNPT1, MTX2, LOC717923, AUP1, PHB2, HSD17B10, NIPSNAP2, LOC717842, LOC114674454, LETM1, MFSD8, DNAJA3, LOC114675333, LOC114674453, LOC114677344, LOC707493, LOC100427190, SLIRP, LOC702125
GOTERM_BP_DIRECT	GO:0000045~autophagosome assembly	17	0.802644	0.000176959	GABARAPL1, TMEM41B, BECN2, ATG10, LOC697790, TCIRG1, ATG14, VMP1, NSFL1C, ATG16L1, ATG101, RB1CC1, ATG2A, ULK2, TRIM32, ATG5, UBQLN2
GOTERM_BP_DIRECT	GO:0006281~DNA repair	33	1.55807	0.000188866	VCP, FMR1, PDS5B, LOC114669758, ZMPSTE24, TRIM28, EME1, RNF138, RUVBL2, HLTF, RUVBL1, PCLAF, SMARCAD1, POLG, SUPT16H, RRM1, RFC2, XRCC3, NSMCE1, RPA2, GTF2H1, INO80, ACTR8, KIF22, APTX, REXO4, RAD51C, NSMCE4A, MORF4L2, APEX1, UBE2T, PSME4, RAD17
GOTERM_BP_DIRECT	GO:0051086~chaperone mediated protein folding independent of cofactor	6	0.283286	0.000295513	CCT6A, CCT3, TCP1, CCT7, CCT5, CCT4
GOTERM_BP_DIRECT	GO:0006450~regulation of translational fidelity	5	0.236072	0.000336632	YRDC, DNAJC2, PTGES3L, GATC, LOC712203
GOTERM_BP_DIRECT	GO:0075525~viral translational termination-reinitiation	5	0.236072	0.000336632	EIF3L, EIF3G, EIF3D, EIF3A, EIF3B
GOTERM_BP_DIRECT	GO:0030488~tRNA methylation	10	0.472144	0.00035069	METTL1, NSUN2, TRMT6, THUMPD2, WDR6, LOC114673096, MTO1, TRMT61A, FTSJ1, TRDMT1
GOTERM_BP_DIRECT	GO:0032259~methylation	32	1.51086	0.000379365	SETD4, KDM5B, SHMT2, SHMT1, KDM8, THUMPD2, TRMT2A, METTL21A, COMT, PCMT1, FBL, AS3MT, DNMT3L, NTMT1, DPH5, METTL18, TRDMT1, PRMT5, TRMT10A, ARMT1, PRMT3, AMT, TRMT1, ASH1L, COQ5, LOC100426255, COQ3, EEF1AKMT4, NDUFAF5, PEMT, TRMT11, EEF1AKMT1
GOTERM_BP_DIRECT	GO:0006413~translational initiation	12	0.566572	0.000465826	LOC705696, EIF5, EIF2B2, DHX33, EIF1AX, EIF3L, EIF3E, EIF3F, EIF4E2, EIF3D, EIF2S1, EIF3B
GOTERM_BP_DIRECT	GO:0032212~positive regulation of telomere maintenance via telomerase	9	0.424929	0.000511925	CCT6A, CCT3, TCP1, PARN, HNRNPD, CCT7, CCT5, WRAP53, CCT4
GOTERM_BP_DIRECT	GO:0075522~IRES-dependent viral translational initiation	6	0.283286	0.000614201	PTBP1, DENR, EIF3F, EIF3D, EIF3A, EIF3B
GOTERM_BP_DIRECT	GO:0006396~RNA processing	15	0.708215	0.000778667	TRUB2, PNPT1, NOP2, DIS3L, THUMPD2, DNTTIP2, LARP7, NOL9, AEN, TRMT2A, REXO4, EXOSC6, PRPF39, EXOSC1, SUGP1
GOTERM_BP_DIRECT	GO:0000027~ribosomal large subunit assembly	11	0.519358	0.000938637	BOP1, MRPL20, LOC693573, RPL3, RPLP0, MRTO4, PPAN, BRIX1, LOC709201, RPF2, NLE1
GOTERM_BP_DIRECT	GO:0045050~protein insertion into ER membrane by stop-transfer membrane-anchor sequence	6	0.283286	0.00113496	EMC1, EMC2, EMC3, EMC4, EMC10, EMC7
GOTERM_BP_DIRECT	GO:0000470~maturation of LSU-rRNA	7	0.3305	0.00148305	NSA2, LAS1L, EIF6, NOP2, RPF2, RRP15, RPF1
GOTERM_BP_DIRECT	GO:0006351~DNA-templated transcription	17	0.802644	0.00181205	TEAD4, GTF2H1, GTF2H2, LIN9, INO80, CBFA2T2, POLR2B, POLR3C, POLR2C, POLR1C, POLR2E, TCEA1, POLR1E, TAF4B, POLR2G, POLR2I, POLR3K
GOTERM_BP_DIRECT	GO:0031167~rRNA methylation	6	0.283286	0.00192288	FBL, DIMT1, TFB2M, TFB1M, MRM1, FTSJ3
GOTERM_BP_DIRECT	GO:0006096~glycolytic process	13	0.613787	0.00195655	TIGAR, PGAM1, ENO1, ENO2, HK2, LOC694593, HK1, MFSD8, PGK1, LOC704931, LOC694418, LOC696959, ALDOA
GOTERM_BP_DIRECT	GO:0071051~poly(A)-dependent snoRNA 3'-end processing	5	0.236072	0.00202317	EXOSC6, EXOSC5, EXOSC4, PARN, EXOSC2
GOTERM_BP_DIRECT	GO:0097294~'de novo' XMP biosynthetic process	5	0.236072	0.00202317	ADSL, IMPDH2, PPAT, GART, PFAS
GOTERM_BP_DIRECT	GO:0043484~regulation of RNA splicing	12	0.566572	0.00215264	HNRNPL, PTBP1, HNRNPH1, HNRNPF, RBM12B, ZNF326, CCNL1, GRSF1, RBM12, PTBP3, BRDT, FAM50A
GOTERM_BP_DIRECT	GO:0006120~mitochondrial electron transport, NADH to ubiquinone	9	0.424929	0.00233959	NDUFB9, NDUFS8, NDUFS6, NDUFS3, NDUFC2, NDUFS2, NDUFV2, DNAJC15, NDUFV1
GOTERM_BP_DIRECT	GO:0030150~protein import into mitochondrial matrix	8	0.377715	0.00278984	TOMM40, PAM16, TIMM17A, TIMM17B, ROMO1, DNAJC15, TOMM20, TIMM50
GOTERM_BP_DIRECT	GO:0006391~transcription initiation at mitochondrial promoter	4	0.188857	0.00293337	TFAM, TFB2M, POLRMT, TFB1M
GOTERM_BP_DIRECT	GO:0006406~mRNA export from nucleus	10	0.472144	0.00299314	SEM1, XPO1, NUP107, DDX39A, NXT1, NUP155, FMR1, HNRNPA2B1, TPR, THOC5
GOTERM_BP_DIRECT	GO:0000387~spliceosomal snRNP assembly	9	0.424929	0.00301375	PRMT5, SNRPD2, CLNS1A, SNRPG, SNRPE, GEMIN7, GEMIN8, LSM4
GOTERM_BP_DIRECT	GO:0001682~tRNA 5'-leader removal	6	0.283286	0.0030469	POP1, RPP30, PRORP, POP4, RPP40, RPP25L
GOTERM_BP_DIRECT	GO:0051603~proteolysis involved in protein catabolic process	11	0.519358	0.00343989	DNAJC3, PSMB7, PSMB4, CTSL, CTSK, PSMB1, CTSH, UBE2G2, CTSF, CTSV, CLPX
GOTERM_BP_DIRECT	GO:0034475~U4 snRNA 3'-end processing	5	0.236072	0.00375084	EXOSC6, EXOSC5, EXOSC4, EXOSC8, EXOSC2
GOTERM_BP_DIRECT	GO:0071816~tail-anchored membrane protein insertion into ER membrane	7	0.3305	0.00431876	EMC1, EMC2, EMC3, EMC4, EMC10, EMC7, GET4
GOTERM_BP_DIRECT	GO:0006606~protein import into nucleus	19	0.897073	0.00490816	IPO11, NUP107, NXT1, NUP155, NUP133, CSE1L, NUTF2, HIKESHI, PHB2, IPO7, IPO4, IPO5, CRY2, TPR, KPNA6, RANGRF, KPNA4, KPNA2, KPNA1
GOTERM_BP_DIRECT	GO:0009615~response to virus	11	0.519358	0.00590539	IVNS1ABP, URI1, SAP30BP, NPC2, HYAL1, DDX1, DHX36, DDX21, NMI, AUP1, CCT5
GOTERM_BP_DIRECT	GO:0006983~ER overload response	5	0.236072	0.00626014	PPP1R15B, HSPA5, CCDC47, ATG10, TMCO1
GOTERM_BP_DIRECT	GO:0071218~cellular response to misfolded protein	5	0.236072	0.00626014	VCP, DERL1, DNAJB12, UFD1, STUB1
GOTERM_BP_DIRECT	GO:0051290~protein heterotetramerization	6	0.283286	0.00658446	CPSF7, RRM1, CPSF6, FARSA, HSD17B8, FARSB
GOTERM_BP_DIRECT	GO:0045047~protein targeting to ER	6	0.283286	0.00658446	SPCS3, SPCS1, ZFAND2B, SRPRA, SRPRB, SRP14
GOTERM_BP_DIRECT	GO:0042752~regulation of circadian rhythm	10	0.472144	0.00665007	TOP2A, USP7, PRKDC, NONO, NOCT, HNF4A, HNRNPD, CDK1, TARDBP, CCAR2
GOTERM_BP_DIRECT	GO:0009113~purine nucleobase biosynthetic process	4	0.188857	0.00682849	SHMT2, SHMT1, PPAT, GART
GOTERM_BP_DIRECT	GO:0006310~DNA recombination	13	0.613787	0.00693646	FEN1, XRCC6, MCM8, XRCC5, NSMCE1, RPA2, ACTR8, LOC114669758, NSMCE4A, EME1, RUVBL2, APEX1, RUVBL1
GOTERM_BP_DIRECT	GO:0000380~alternative mRNA splicing, via spliceosome	7	0.3305	0.00768088	DDX17, HNRNPM, SFPQ, PUF60, DHX9, SRSF6, SRSF9
GOTERM_BP_DIRECT	GO:0045862~positive regulation of proteolysis	7	0.3305	0.00768088	HDAC2, ASPH, IST1, STUB1, FADD, BTRC, TRIM32
GOTERM_BP_DIRECT	GO:0034314~Arp2/3 complex-mediated actin nucleation	7	0.3305	0.00768088	TTLL3, ARPC2, ARPC3, ARPC1B, ARPC1A, ARPC5L, TRIM27
GOTERM_BP_DIRECT	GO:0016226~iron-sulfur cluster assembly	7	0.3305	0.00768088	HSPA9, NFS1, NUBPL, CIAO2A, CIAPIN1, NUBP2, CIAO1
GOTERM_BP_DIRECT	GO:1990830~cellular response to leukemia inhibitory factor	16	0.75543	0.00854375	ABCD4, KDM5B, XBP1, TFRC, CTBP2, XRCC5, SHMT1, HNRNPU, MRPL15, KLF4, SIRT1, HK2, BSPRY, NR5A2, RNF138, NCL
GOTERM_BP_DIRECT	GO:0070979~protein K11-linked ubiquitination	9	0.424929	0.00889524	CDC23, ANAPC16, ANAPC7, RNF26, UBE2T, UBE2E2, ANAPC5, ANAPC2, ACAT1
GOTERM_BP_DIRECT	GO:0016075~rRNA catabolic process	6	0.283286	0.00913517	EXOSC6, EXOSC5, EXOSC4, DIS3, DIS3L, EXOSC8
GOTERM_BP_DIRECT	GO:0030490~maturation of SSU-rRNA	6	0.283286	0.00913517	NOP14, NOB1, WDR3, SNU13, SRFBP1, DDX52
GOTERM_BP_DIRECT	GO:0000423~mitophagy	12	0.566572	0.00942154	GABARAPL1, TIGAR, BECN2, ATG10, LOC697790, ARFIP2, ULK2, ATG14, EIF2S1, PHB2, ATG5, NIPSNAP2
GOTERM_BP_DIRECT	GO:0000722~telomere maintenance via recombination	5	0.236072	0.00967693	RAD51C, RAD51, NSMCE2, XRCC3, TPRKB
GOTERM_BP_DIRECT	GO:0017183~protein histidyl modification to diphthamide	5	0.236072	0.00967693	DPH1, DPH2, DPH5, DPH6, DPH7
GOTERM_BP_DIRECT	GO:0000413~protein peptidyl-prolyl isomerization	7	0.3305	0.00992721	PPIL1, LOC100430373, PPIE, PPIA, CD300LG, PPID, NKTR
GOTERM_BP_DIRECT	GO:0010824~regulation of centrosome duplication	7	0.3305	0.00992721	NPM1, XPO1, CHORDC1, XRCC3, LOC114676394, SIRT1, CHMP5
GOTERM_BP_DIRECT	GO:0006888~endoplasmic reticulum to Golgi vesicle-mediated transport	20	0.944287	0.0117699	TRAPPC2, TRAPPC3, SEC23A, SEC24B, TMED10, TRAPPC2L, SAR1B, COPB1, TEX261, RABGGTB, YIF1B, LMAN2, RANGRF, BCAP29, MPPE1, DUS4L, TMED7, SEC23B, ERGIC2, CNIH4
GOTERM_BP_DIRECT	GO:0006511~ubiquitin-dependent protein catabolic process	29	1.36922	0.011873	RNF11, UBE3C, PSMD13, CUL2, RNF5, ACAT1, OS9, ARIH2, UFD1, NAE1, UBQLN4, GET4, UBQLN2, LOC114669927, XBP1, NDFIP2, NDFIP1, RNF26, SIAH1, UBE4A, LOC699631, KCTD6, CUL4A, PSMA6, RNF167, PSMA1, TRIM32, KCTD15, ANAPC2
GOTERM_BP_DIRECT	GO:0048025~negative regulation of mRNA splicing, via spliceosome	6	0.283286	0.0122927	PTBP1, HNRNPK, C1QBP, SRSF6, RBM10, SRSF9
GOTERM_BP_DIRECT	GO:0000398~mRNA splicing, via spliceosome	24	1.13314	0.0134829	HNRNPA3, PPIL1, RBM8A, DDX46, YJU2, LOC114680234, U2AF1, WDR83, SNU13, CASC3, LSM5, LSM4, PRPF4, DDX39A, TRA2A, HNRNPA2B1, SNRPG, NHP2, DHX16, PPIE, SNRPE, PRPF31, RBM10, RBM44
GOTERM_BP_DIRECT	GO:0000056~ribosomal small subunit export from nucleus	5	0.236072	0.0141078	RPS15, NPM1, XPO1, LOC114676394, NOP9
GOTERM_BP_DIRECT	GO:2000767~positive regulation of cytoplasmic translation	5	0.236072	0.0141078	DHX9, DHX36, IGF2BP1, HNRNPD, HNRNPU
GOTERM_BP_DIRECT	GO:0034975~protein folding in endoplasmic reticulum	5	0.236072	0.0141078	DNAJC3, EMC1, EMC2, EMC3, EMC4
GOTERM_BP_DIRECT	GO:0006264~mitochondrial DNA replication	5	0.236072	0.0141078	RRM1, DNAJA3, TWNK, SSBP1, POLG
GOTERM_BP_DIRECT	GO:0030970~retrograde protein transport, ER to cytosol	6	0.283286	0.0161144	VCP, OS9, FAF2, DERL1, UFD1, AUP1
GOTERM_BP_DIRECT	GO:0051028~mRNA transport	9	0.424929	0.0177986	NUP107, RBM8A, NUP133, FMR1, HNRNPA2B1, IGF2BP1, NUTF2, CASC3, MAGOHB
GOTERM_BP_DIRECT	GO:0061723~glycophagy	5	0.236072	0.0196383	GABARAPL1, RB1CC1, ATG2A, WIPI2, WDR45
GOTERM_BP_DIRECT	GO:0006614~SRP-dependent cotranslational protein targeting to membrane	5	0.236072	0.0196383	LOC106997715, SSR3, SRPRA, SRP14, LOC721366
GOTERM_BP_DIRECT	GO:0000723~telomere maintenance	10	0.472144	0.0201835	XRCC6, ZNF827, PRKDC, XRCC5, RUVBL2, MCRS1, RUVBL1, RPA2, NBN, INO80
GOTERM_BP_DIRECT	GO:0006189~'de novo' IMP biosynthetic process	4	0.188857	0.020745	ADSL, PPAT, GART, PFAS
GOTERM_BP_DIRECT	GO:1900152~negative regulation of nuclear-transcribed mRNA catabolic process, deadenylation-dependent decay	4	0.188857	0.020745	DHX9, IGF2BP1, HNRNPD, HNRNPU
GOTERM_BP_DIRECT	GO:2001233~regulation of apoptotic signaling pathway	4	0.188857	0.020745	BAK1, LOC114675515, PPIA, MCL1
GOTERM_BP_DIRECT	GO:0016236~macroautophagy	9	0.424929	0.0207716	RAB2B, GABARAPL1, EI24, ATG10, LOC697790, PIK3R4, SNF8, ATG5, VTI1B
GOTERM_BP_DIRECT	GO:0000724~double-strand break repair via homologous recombination	17	0.802644	0.0226796	AP5Z1, PSMD14, MCM8, ZMYND8, INTS3, XRCC3, NSMCE2, NSMCE1, RPA2, INO80, SEM1, SFPQ, RAD51, RNF138, SWI5, AUNIP, NBN
GOTERM_BP_DIRECT	GO:0032526~response to retinoic acid	7	0.3305	0.023578	ACER2, RXRB, TRIML2, GATA6, CTSH, KLF4, AQP3
GOTERM_BP_DIRECT	GO:0000472~endonucleolytic cleavage to generate mature 5'-end of SSU-rRNA from (SSU-rRNA, 5.8S rRNA, LSU-rRNA)	3	0.141643	0.024029	ABT1, TBL3, NOP9
GOTERM_BP_DIRECT	GO:0141164~mitochondrial protein quality control	3	0.141643	0.024029	OXA1L, AFG3L2, TMEM126A
GOTERM_BP_DIRECT	GO:0036416~tRNA stabilization	3	0.141643	0.024029	METTL1, NSUN2, TRDMT1
GOTERM_BP_DIRECT	GO:0034462~small-subunit processome assembly	3	0.141643	0.024029	ABT1, PRKDC, XRCC5
GOTERM_BP_DIRECT	GO:0034976~response to endoplasmic reticulum stress	11	0.519358	0.0245898	EIF2B5, PPP1R15B, TMEM258, DDRGK1, GORASP2, TMEM259, TMEM33, TMTC3, UFC1, NRBF2, PDIA4
GOTERM_BP_DIRECT	GO:0070131~positive regulation of mitochondrial translation	5	0.236072	0.026332	TRUB2, MRPS27, FASTKD2, FASTKD3, MPV17L2
GOTERM_BP_DIRECT	GO:0060816~random inactivation of X chromosome	5	0.236072	0.026332	SUZ12, SPEN, HNRNPK, HNRNPU, LBR
GOTERM_BP_DIRECT	GO:0006607~NLS-bearing protein import into nucleus	5	0.236072	0.026332	KPNA6, KPNA4, KPNA2, IPO5, KPNA1
GOTERM_BP_DIRECT	GO:0006183~GTP biosynthetic process	5	0.236072	0.026332	LOC698764, IMPDH1, IMPDH2, NME2, NME1
GOTERM_BP_DIRECT	GO:0032446~protein modification by small protein conjugation	7	0.3305	0.0283239	DBNL, UBE2T, ATG10, UBE2G1, LOC707320, UBE2G2, SAE1
GOTERM_BP_DIRECT	GO:0006417~regulation of translation	14	0.661001	0.0284411	FMR1, RPLP0, NOLC1, MSI1, CASC3, BZW1, TARBP2, PUM3, IMPACT, SERBP1, RPL38, RBM24, DUS3L, METTL18
GOTERM_BP_DIRECT	GO:0051301~cell division	29	1.36922	0.0309327	INTS13, CDC123, ANAPC16, CDCA4, CCNF, GNAI3, PDS5B, CCAR1, CCND3, CDC23, TIGAR, NUDC, ANAPC7, KLHDC8B, SEPTIN7, PPP1CA, TPX2, MAU2, STAG2, CDK4, CDK1, NCAPD2, ANAPC5, KIF2C, ATXN10, LAMTOR1, MAPRE1, ANAPC2, ARL8B
GOTERM_BP_DIRECT	GO:0090435~protein localization to nuclear envelope	4	0.188857	0.0309414	INTS13, TOR1AIP2, TOR1AIP1
GOTERM_BP_DIRECT	GO:0016180~snRNA processing	4	0.188857	0.0309414	INTS11, INTS3, INTS4, INTS7
GOTERM_BP_DIRECT	GO:0071028~nuclear mRNA surveillance	4	0.188857	0.0309414	EXOSC6, EXOSC5, EXOSC4, EXOSC8
GOTERM_BP_DIRECT	GO:0044208~'de novo' AMP biosynthetic process	4	0.188857	0.0309414	ADSL, PPAT, GART, PFAS
GOTERM_BP_DIRECT	GO:0070534~protein K63-linked ubiquitination	11	0.519358	0.0309717	ARRDC4, RNF167, UBE2T, UBE2V2, ARIH2, UBE2E2, UBE2G1, TRAF2, TRIM27, RNF5, TRIM32
GOTERM_BP_DIRECT	GO:0034599~cellular response to oxidative stress	12	0.566572	0.0314753	VKORC1L1, PRDX5, PNPT1, TXNRD2, AMDHD2, TXNRD1, SESN2, SLC1A1, ARNT, AUP1, EIF2S1, PPIA
GOTERM_BP_DIRECT	GO:0061709~reticulophagy	6	0.283286	0.0320348	RETREG3, DDRGK1, RB1CC1, ATG2A, UFC1, ULK2
GOTERM_BP_DIRECT	GO:0042110~T cell activation	8	0.377715	0.0332295	DPP4, CUL4A, LOC693438, GRB2, TRAF2, SOS1, DCAF12, HSPD1
GOTERM_BP_DIRECT	GO:0045454~cell redox homeostasis	7	0.3305	0.0336581	PRDX5, GLRX3, TXNRD2, TXNRD1, APEX1, KRIT1, SELENOT
GOTERM_BP_DIRECT	GO:0006260~DNA replication	14	0.661001	0.0341295	SUPT16H, RRM1, RFC2, TWNK, RPA2, DNAJC2, ORC4, TOP1MT, GRWD1, MCM3, PCLAF, MCM4, MCM5, SSBP1
GOTERM_BP_DIRECT	GO:0006465~signal peptide processing	5	0.236072	0.034231	SPCS3, IMMP2L, SPCS1, SPPL3, SEC11C
GOTERM_BP_DIRECT	GO:0060382~regulation of DNA strand elongation	5	0.236072	0.034231	INO80C, RUVBL2, MCRS1, RUVBL1, INO80
GOTERM_BP_DIRECT	GO:0031648~protein destabilization	10	0.472144	0.0377753	UTP25, PRNP, XBP1, PRKDC, KDM8, DERL1, CTSH, BTRC, RNF5, SIRT1
GOTERM_BP_DIRECT	GO:0070934~CRD-mediated mRNA stabilization	4	0.188857	0.0432821	DHX9, IGF2BP1, HNRNPD, HNRNPU
GOTERM_BP_DIRECT	GO:0042255~ribosome assembly	4	0.188857	0.0432821	EIF5, EIF1AX, NIP7, DHX37
GOTERM_BP_DIRECT	GO:0035999~tetrahydrofolate interconversion	4	0.188857	0.0432821	MTHFD1, MTHFD2, SHMT2, SHMT1
GOTERM_BP_DIRECT	GO:1903843~cellular response to arsenite ion	3	0.141643	0.0451247	VCP, DHX36, ZFAND1
GOTERM_BP_DIRECT	GO:0051224~negative regulation of protein transport	3	0.141643	0.0451247	SNX3, NDFIP2, NDFIP1
GOTERM_BP_DIRECT	GO:0062029~positive regulation of stress granule assembly	3	0.141643	0.0451247	CAPRIN1, G3BP1, G3BP2
GOTERM_BP_DIRECT	GO:0030242~autophagy of peroxisome	3	0.141643	0.0451247	ACBD5, RB1CC1, PIK3R4
GOTERM_BP_DIRECT	GO:0006270~DNA replication initiation	6	0.283286	0.0466904	ORC4, PRIM1, MCM3, MCM4, MCM5, MCM6
GOTERM_BP_DIRECT	GO:0006446~regulation of translational initiation	6	0.283286	0.0466904	IMPACT, EIF5, EIF3K, BZW2, BZW1, EIF3B

## Sheet: GO enrichment of O8C down genes
GO enrichment of downregulated genes in O8C
Category	Term	Count	%	P-value	Genes
GOTERM_BP_DIRECT	GO:0030036~actin cytoskeleton organization	52	1.28809	3.08613e-07	THSD7B, TGFB1I1, TESK1, FMN1, FMN2, WASL, CAPZB, PHACTR3, THSD7A, HMCN1, MINK1, ACTN4, SPTB, DAAM1, PIK3CA, PALLD, DAAM2, ELMO1, CDC42EP2, TNIK, SMTNL2, PFN2, KANK1, SHC1, ATP2C1, PDLIM1, PAK1, PDLIM2, NUAK2, ABL1, RICTOR, WASF1, WASF2, SPECC1, FARP2, PTPN1, STARD13, IQSEC2, IQSEC3, LIMK1, DTNBP1, PARVB, SSH2, SSH1, TBCK, MKLN1, DIAPH2, FER, FMNL2, BCL6, PARVG, AMOTL1
GOTERM_BP_DIRECT	GO:0035556~intracellular signal transduction	99	2.45232	8.50808e-07	ITSN1, CBLB, PREX2, TCL1B, PREX1, TCL1A, RPS6KA6, AKT2, CHEK1, AKT1, STK32C, RGS7, PRKCG, DAPK2, MELK, MAPKAPK2, MYADM, SIK3, PRKCQ, PRKD1, DGKI, SHC4, SHC1, STK39, PSEN2, NLK, STK4, KALRN, PRKCZ, NUAK2, DVL1, STK38, RSU1, PLCG1, ECT2, SOCS6, SOCS7, DCLK2, DCDC2, AZU1, DCLK1, SRPK1, MFHAS1, DNMBP, STK24, STK26, PPP1R1C, CDK2, PPP1R1B, PLCH1, PLCH2, CNOT9, MAST4, HSPB1, FMN2, FLCN, BLNK, VAV3, RAS…
GOTERM_BP_DIRECT	GO:0000902~cell morphogenesis	35	0.86698	1.37443e-06	CYFIP2, YAP1, CYFIP1, NCKAP1, EPB42, ARHGEF28, CCDC146, ITPR1, STK4, LIPA, CDH8, CDH5, CDH3, CAPZB, CDH2, CDH1, PDPN, POC1B, ECT2, LYN, STRADB, WDR19, UPK3A, KLF2, SSH1, ASXL1, ARMC2, BCL6, CDH10, CDH11, CDH13, CDH17, CDH18, CDH19, SIDT2
GOTERM_BP_DIRECT	GO:0016477~cell migration	62	1.53579	4.93773e-06	ERRFI1, NCKAP1, SH3KBP1, WWC2, ATN1, PTPRK, FMN2, CDH8, PIK3C2B, CDH5, CDH3, CDH2, CDH1, SIX2, NCK2, SPDL1, NDEL1, VAV3, APC2, USP45, VAV1, CD2AP, TIAM1, CTTN, PIK3CA, PEAK1, PALLD, CDH10, CDH11, KCTD13, CDH13, LCP1, CDH17, DOCK1, CDH18, ENG, CDH19, TGFBR3L, PAK1, ADGRG1, PODXL, PDPN, CTNNA1, GPC5, CTNNA2, GPC4, PLCG1, GPC6, JAM3, JUP, NDE1, LAMB4, NFATC2, CDC42BPB, CDC42BPA, EFNA1, FMNL2, APC, B…
GOTERM_BP_DIRECT	GO:0010468~regulation of gene expression	53	1.31286	7.82411e-06	CRYBG2, PRDM6, LOC705507, LOC718749, YBX2, AFF3, AFF4, LOC693283, AFF1, CEP128, SLC8A2, AFF2, UFL1, TRIM6, LOC106995677, LOC720590, DNMT3B, HMG20A, TRIM21, MAP3K4, LOC708864, KDM6B, LOC693908, LOC708050, DNMT3A, ATP1B1, LOC700412, TRIM11, CGGBP1, SHC4, TSHZ2, TOB2, MEFV, TOB1, RFPL4A, FUT8, PCBP3, RBBP4, LOC106995979, DROSHA, RICTOR, IGF2BP3, LOC703832, LOC700765, RBBP7, TRIM44, NELL1, TFAP4, LOC…
GOTERM_BP_DIRECT	GO:0044331~cell-cell adhesion mediated by cadherin	15	0.371563	1.67261e-05	CTNND1, PLEKHA7, CDH8, CD2AP, CDH5, FER, CDH3, CDH2, CDH1, CDH10, CDH11, CDH13, CDH17, CDH18, CDH19
GOTERM_BP_DIRECT	GO:0006468~protein phosphorylation	99	2.45232	4.30944e-05	TRIO, ULK4, ARAF, TESK1, MYLK, RPS6KA6, AKT2, CHEK1, NEK1, AKT1, NEK3, ROS1, STK32C, MAP3K4, PDK1, PRKCG, MAP2K4, PDGFRA, MAP2K1, DAPK2, ERN1, MELK, SIK3, TNIK, PRKD1, CSF1R, PXK, STK39, NLK, STK4, KALRN, PRKCZ, GRK3, NUAK2, ABL1, MAP2K7, MAP2K5, LYN, YES1, MLKL, NEK5, PLK2, NEK7, DCLK2, EIF2AK2, BRAF, CDC7, DCLK1, SRPK1, TBCK, CDK5, STK24, STK26, CDK2, BMPR1B, MAP3K11, BMPR1A, DDR1, EEF2K, PRKG2…
GOTERM_BP_DIRECT	GO:0016601~Rac protein signal transduction	11	0.27248	0.000238526	FARP2, EPS8, CYFIP1, TIAM1, FARP1, NCKAP1, ELMO1, RHOG, CDH13, WASF1, WASF2
GOTERM_BP_DIRECT	GO:0060271~cilium assembly	50	1.23854	0.000274944	TCP10L, TRAF3IP1, CCDC28B, IFT52, TCTN2, TCTN1, BBS9, NEK1, BBS7, BBS5, RAB8A, BBS4, OFD1, ABCC4, ACTR2, DNAAF1, ARMC9, RFX3, WDR35, CFAP221, RILPL2, WDPCP, TRIM59, ARL6, B3GLCT, PRICKLE1, ACTR3B, CRYZ, ABLIM1, CFAP298, KIF3A, RAB23, INPP5E, POC1B, BBS2, WDR19, DTNBP1, DCDC2, EHD2, EHD3, EHD4, DNMBP, KIAA0586, A4GNT, HYLS1, CEP83, B9D1, DZIP1, CLUAP1, CEP89
GOTERM_BP_DIRECT	GO:0072659~protein localization to plasma membrane	40	0.990835	0.000375823	RAB3B, PSMD10, ERRFI1, C2CD5, RAB3A, PLEKHF1, SH2D4B, RAB3D, STXBP1, ATP2C2, PRKCZ, LRP6, RAB40C, CDH2, CDH1, AKT2, ARL6IP5, RAB8A, GPR158, FYB2, PPIL2, JUP, SMURF1, TESC, RHBDF2, PDZK1, ANK3, ATP1B1, EFR3B, TNFRSF1A, EHD2, TSPAN15, DLG1, EHD3, EHD4, PACS2, PACS1, TNIK, RAPGEF6, RAMP1
GOTERM_BP_DIRECT	GO:0030100~regulation of endocytosis	11	0.27248	0.00040907	RUFY1, GTF2A1L, PTPN1, RAB5B, RAB4A, RAB4B, RIT2, LOC704173, BIN1, HIP1R, CDH13
GOTERM_BP_DIRECT	GO:0071294~cellular response to zinc ion	11	0.27248	0.000669854	MT2A, GLRA2, LOC709273, LOC709619, HVCN1, MT1M, LOC709451, ZNF658, MT1X, LOC100424768, MT1E
GOTERM_BP_DIRECT	GO:0007043~cell-cell junction assembly	15	0.371563	0.000765229	CTNND1, NR1H4, CDH8, FLCN, CDH5, CDH3, CDH2, CDH1, TRPV4, CDH10, CDH11, CDH13, CDH17, CDH18, CDH19
GOTERM_BP_DIRECT	GO:0007030~Golgi organization	35	0.86698	0.000907127	LOC712182, STX17, LOC715898, SYNE1, LMAN1, GOLGA5, LOC100430473, LOC106996343, LOC707197, LOC106996242, LOC720574, RAB6B, RAB8A, DYNC2H1, LOC722977, ATP8B4, COG6, COG5, SURF4, ZFP69B, GOLPH3L, VPS13B, LYSMD3, TJAP1, LOC100427840, GOLPH3, ZFP69, LOC706794, LOC100430266, HOOK1, PLEKHM2, PRKD1, KIFC3, ZCCHC4, BLZF1
GOTERM_BP_DIRECT	GO:0000122~negative regulation of transcription by RNA polymerase II	150	3.71563	0.000915662	PRDM6, WWC2, ZBTB26, ATN1, EHMT1, SLA2, ELK4, ZFP36, SALL2, CCND1, FGF9, TRIM29, LOC705273, SAP130, EPC1, ZNF569, HOXA7, ZNF202, TP63, PIAS4, LMO1, ZNF441, ZBTB39, MLIP, SMARCC2, LMO4, LOC720438, USP2, ZFP69B, HNF1B, ZBTB33, ISL1, SAP30, PIAS1, LOC705142, BIN1, BCORL1, ZFPM2, SQSTM1, CGGBP1, PSMD10, DNMT1, NOTCH4, MEPCE, LOC719571, LOC114674074, GATA2, NPAS1, PHF21A, ZBTB2, GLIS2, SDCBP, ATXN1, P…
GOTERM_BP_DIRECT	GO:0008333~endosome to lysosome transport	16	0.396334	0.00105808	PLEKHF2, PXK, SNAPIN, PLEKHF1, CDX2, MGRN1, AKTIP, DENND3, TRAK1, LIPA, MTM1, SNX16, HOOK1, BIN1, VIPAS39, SCYL2
GOTERM_BP_DIRECT	GO:0016339~calcium-dependent cell-cell adhesion via plasma membrane cell adhesion molecules	13	0.322021	0.00135029	NLGN1, ATP2C1, CDH8, CDH5, CDH3, CDH2, CDH1, CDH10, CDH11, CDH13, CDH17, CDH18, CDH19
GOTERM_BP_DIRECT	GO:0045893~positive regulation of DNA-templated transcription	66	1.63488	0.00142893	CDKN1C, FANK1, RNF10, RNF14, BRCA1, BRCA2, ING1, EDRF1, LBH, SFR1, CDH1, FNTB, TRIM3, GPBP1, SPIN1, CD38, NFRKB, YAF2, RNF111, TP63, NKX3-1, ZNF287, MAP2K1, SMARCC2, ANKRD49, TESC, TFE3, RHOG, DYRK1A, MSL2, MSL3, HNF1B, HNF1A, ARID1A, ELF1, IRF2, IRF8, MAPRE3, ZP3, CREB5, SHC1, NR1I2, GATA2, MLLT3, NPAS2, NPAS3, BICRA, ERBB4, TP53INP2, WBP2NL, TP53INP1, PPARGC1A, TRIM44, ZNF541, TRIM45, ZFHX3, AF…
GOTERM_BP_DIRECT	GO:0034332~adherens junction organization	13	0.322021	0.00188702	ADAM10, CDH8, CDH5, CDH3, CDH2, CDH1, CDH10, CDH11, NUMB, CDH13, CDH17, CDH18, CDH19
GOTERM_BP_DIRECT	GO:0030838~positive regulation of actin filament polymerization	15	0.371563	0.00190049	FMN1, BAIAP2, MTOR, PYCARD, DLG1, FER, BAIAP2L1, CTTN, BIN1, CDC42EP3, NCK2, EVL, RICTOR, SNX9, CCL26
GOTERM_BP_DIRECT	GO:0048278~vesicle docking	10	0.247709	0.00204886	STX12, NDRG4, STX17, STX16, CAV2, STX7, STX6, STX5, CEP83, STX2
GOTERM_BP_DIRECT	GO:0008286~insulin receptor signaling pathway	19	0.470647	0.00245767	BCAR3, PTPN1, C2CD5, SHC1, CAV2, IGF2, PIK3R3, PIK3R1, FOXO1, FER, APC, PIK3CA, AKT2, AKT1, ZNF106, SOCS7, PIGF, APPL1, NDEL1
GOTERM_BP_DIRECT	GO:0055123~digestive system development	5	0.123854	0.00280871	CDKN1C, WDR19, HIP1R, WDPCP, BARX1
GOTERM_BP_DIRECT	GO:0006897~endocytosis	38	0.941293	0.00286806	ITSN2, DENND1C, RAB5B, DENND1A, ITSN1, LRP5, DNAJC22, VLDLR, LIPA, LRP6, NCKIPSD, FCHO1, CREG1, MYO6, MRC1, REPS2, SNX9, EPS15, WASF2, ATP9A, GTF2A1L, RALBP1, USP20, FNBP1, HIP1R, EPS15L1, SORL1, DNM3, EHD2, SH3YL1, CLCN5, EHD3, RAB31, MYO1C, BIN3, EHD4, MYO1H, PIGF
GOTERM_BP_DIRECT	GO:0043065~positive regulation of apoptotic process	49	1.21377	0.00292929	FANK1, B4GALT1, FLCN, AIFM2, ARL6IP5, EMILIN2, CCN1, STPG1, BNIP3L, CAMK1D, TSC22D1, PRMT2, RIPK2, IGFBP3, DAPK2, TMC8, UNC5C, MELK, BIN1, ALDH1A2, RARB, ITGA6, ATF6, PXT1, HTRA1, ITPR1, STK4, FOXO1, SYCE3, BCL2L10, MAPK8, ACVR1C, FRZB, TP53INP1, E2F1, ECT2, BARD1, GADD45B, STAT1, HIP1R, MLLT11, NR4A1, TFAP4, BCL6, ERCC3, APC, PDCD2, MAP3K11, BCL2L1
GOTERM_BP_DIRECT	GO:0015810~aspartate transmembrane transport	7	0.173396	0.0063014	SLC3A1, LRRC8D, LRRC8A, LRRC8B, ERC2, LRRC8E, SLC25A13
GOTERM_BP_DIRECT	GO:0000289~nuclear-transcribed mRNA poly(A) tail shortening	7	0.173396	0.0063014	PAN2, ZFP36, CNOT6L, PNLDC1, CNOT3, SAMD4A, SAMD4B
GOTERM_BP_DIRECT	GO:0007099~centriole replication	10	0.247709	0.00634482	CEP135, CETN1, PITPNM3, CEP152, CEP295, CETN2, SASS6, POC1B, RTTN, CEP63
GOTERM_BP_DIRECT	GO:0030866~cortical actin cytoskeleton organization	11	0.27248	0.006421	FHOD3, NCKAP1, EHD2, DLG1, FMNL2, AKAP11, EPB41L2, CAVIN3, EPB41L3, PIGF, LLGL2
GOTERM_BP_DIRECT	GO:0045944~positive regulation of transcription by RNA polymerase II	143	3.54223	0.00656563	CCNK, SMARCB1, CRTC3, PID1, CRTC1, NUCKS1, DCAF6, ZMIZ1, ZMIZ2, GPBP1, EPC1, AKT1, CCN1, LMO1, SLC30A9, LMO4, MAMSTR, MRTFB, RFX3, MRTFA, HNF1A, ACTN4, ISL1, RUNX1, HCFC1, IL23A, RFX7, ATF7, PRKD1, TOX, ZFPM2, AKNA, KMT2C, PRDM15, LOC714689, PIK3R1, GATA2, PRDM10, ACTR3B, MED12L, GLIS2, PLAC8, GALR1, PCBP1, DVL1, CAMTA2, SMYD3, PPARGC1A, SMAD2, AKIRIN2, TFAP2D, JAG1, JUP, IGF2, NFATC2, NFATC1, SM…
GOTERM_BP_DIRECT	GO:0010508~positive regulation of autophagy	20	0.495417	0.00708816	PLEKHF1, USP20, PLK2, LOC705507, MEFV, FOXO3, SVIP, FOXO1, RFPL4A, FLCN, TRIM6, CCNY, STK35, TP53INP1, PRKD1, LOC703832, SQSTM1, TRIM21, ATF6, RNF152
GOTERM_BP_DIRECT	GO:0021756~striatum development	6	0.148625	0.00733746	BBS2, SECISBP2, OGDH, RARB, SLC7A11, BBS4
GOTERM_BP_DIRECT	GO:0016567~protein ubiquitination	71	1.75873	0.00744557	KLHL36, WDSUB1, RNF14, RNF19B, CBLB, TMEM131L, PRPF19, TRIM6, RNF114, CDC27, TRIM3, TRIM24, AKT1, TRIM21, BBS5, PCMTD1, FBXO9, TRIM63, EIPR1, MSL2, TRPC4AP, PJA2, RNF41, RNF144B, KCTD13, TRIM59, PDZRN3, RNF166, KLHL18, UHRF2, CUL5, MGRN1, UHRF1, RNF38, CUL1, DTX1, NEDD4L, DTX2, FBXO43, ANAPC11, DCAF15, CAND2, VCPIP1, DCAF17, UBB, RAB40C, KCTD21, UBC, RNF170, RBBP6, FYN, TRIM42, SOCS6, SOCS7, PPIL…
GOTERM_BP_DIRECT	GO:0090023~positive regulation of neutrophil chemotaxis	9	0.222938	0.00854995	RIPOR2, CAMK1D, IL23A, DAPK2, C5AR1, MOSPD2, RAC2, CCR7, THBS4
GOTERM_BP_DIRECT	GO:0060612~adipose tissue development	11	0.27248	0.00858607	FTO, AMER1, ATF2, SELENOM, PIK3CA, LRP5, EBF2, VPS13B, LIPA, PPARGC1A, CD2AP
GOTERM_BP_DIRECT	GO:0006082~organic acid metabolic process	11	0.27248	0.00858607	CYP2C9, LOC100424795, CYP2C76, CYP2R1, CYP2C93, FMO2, CYP2E1, CYP2F1, CYP2C18
GOTERM_BP_DIRECT	GO:0046856~phosphatidylinositol dephosphorylation	11	0.27248	0.00858607	FIG4, INPP5B, MTMR1, MTMR2, MTMR3, INPP5E, PTEN, INPP5J, MTMR8, SYNJ2, MTM1
GOTERM_BP_DIRECT	GO:0065003~protein-containing complex assembly	18	0.445876	0.00890327	YAP1, MGRN1, WDR19, DNAJB14, JCHAIN, ADD2, CLGN, EXT1, TIAM1, TFAP4, APC, NEMF, DLG5, DMD, OTX2, ANKS4B, SSBP3, CNTLN
GOTERM_BP_DIRECT	GO:0098656~monoatomic anion transmembrane transport	7	0.173396	0.0101403	SLC13A3, SLC13A4, LRRC8D, VDAC1, LRRC8A, LRRC8B, LRRC8E
GOTERM_BP_DIRECT	GO:0006338~chromatin remodeling	38	0.941293	0.0109148	RERE, KDM5C, SMARCB1, SATB1, PSIP1, CHD3, MYSM1, RBBP4, LOC106995979, SCMH1, MIER1, PCGF1, LOC700765, SUDS3, RBBP7, NFRKB, TP63, BRD4, PHC1, SMARCC2, NPM2, PRMT2, TPRG1, PCGF2, LRRC27, HNF1A, UBE2A, ARID1A, NPM3, SMARCA2, FOXP3, GATAD2B, HCFC1, COPRS, TADA2B, KAT2A, LOC700412, HDGFL2
GOTERM_BP_DIRECT	GO:1900181~negative regulation of protein localization to nucleus	8	0.198167	0.011497	ILRUN, MFHAS1, SIN3A, TRIM29, CTNNA1, OTUD7B, MTOR, DCLK1
GOTERM_BP_DIRECT	GO:0045197~establishment or maintenance of epithelial cell apical/basal polarity	10	0.247709	0.0117588	DLG1, DLG2, DLG3, CDX2, LRRC7, PARD3, DLG5, DNER, DLK2, PARD3B
GOTERM_BP_DIRECT	GO:0098703~calcium ion import across plasma membrane	9	0.222938	0.0119142	SLC24A2, TRPV6, TRPV4, CACNA1A, CACNA1D, CACNA1C, CACNA1E, SLC8A1, SLC8A2
GOTERM_BP_DIRECT	GO:0017148~negative regulation of translation	18	0.445876	0.0125915	NANOS1, GRB7, IGFBP5, NHLRC3, PCIF1, SAMD4A, SAMD4B, EIF2AK2, PRG3, TOB1, QKI, EIF4ENIF1, PAIP2B, CNOT11, ZAR1L, CAPRIN2, TRIM3, CNOT9
GOTERM_BP_DIRECT	GO:0042178~xenobiotic catabolic process	6	0.148625	0.0127642	GSTM4, CYP2C9, GSTM2, NR1I2, CYP2C18
GOTERM_BP_DIRECT	GO:0034144~negative regulation of toll-like receptor 4 signaling pathway	6	0.148625	0.0127642	LYN, MFHAS1, THRA, DAB2IP, TAX1BP1, SQSTM1
GOTERM_BP_DIRECT	GO:0006366~transcription by RNA polymerase II	34	0.84221	0.0130542	GCM1, CCNK, THRA, PRDM4, LEF1, NCAPG2, HIF3A, PIK3R1, GATA2, BARX2, PLAC8, HJV, TAF9B, TP63, GTF2A1L, MLIP, SMARCC2, TFAP2D, TPRG1, NR1H4, NFATC2, GRHL3, FOS, FOXP3, ISL1, SUPT3H, TNFRSF1A, BCL9, NR4A1, TFDP1, BCL6, IRF1, CD28, SQSTM1
GOTERM_BP_DIRECT	GO:0031032~actomyosin structure organization	12	0.29725	0.0134569	LOC114675313, FRMD3, EPB41L4A, DMPK, LIMCH1, EPB41L2, EPB41L3, CDC42BPB, CDC42BPA, MYH10, CNN3, CIT
GOTERM_BP_DIRECT	GO:0060468~prevention of polyspermy	4	0.0990835	0.0142409	ASTL, ZP1, ZP2, ZP4
GOTERM_BP_DIRECT	GO:0006606~protein import into nucleus	26	0.644043	0.014335	RPAIN, ATF2, TRAF3IP2, PRICKLE1, PIK3R1, STK4, ELAVL1, ING1, EIF4ENIF1, IPO8, FGF9, SIX2, LOC100429632, KPNA7, FAM53B, AKT1, FAM53A, APPL2, TNPO3, APPL1, SEC13, SYK, NUP153, NFKBIA, BCL3, SQSTM1
GOTERM_BP_DIRECT	GO:0048813~dendrite morphogenesis	11	0.27248	0.014541	PREX2, RERE, CDK5, DVL1, SLC11A2, DTNBP1, DCDC2, FYN, VLDLR, DCLK1, PICALM
GOTERM_BP_DIRECT	GO:0098968~neurotransmitter receptor transport postsynaptic membrane to endosome	5	0.123854	0.0150127	MKLN1, RAB4A, LRRC7, TAX1BP3, LRRC1
GOTERM_BP_DIRECT	GO:0006750~glutathione biosynthetic process	5	0.123854	0.0150127	GCLC, SLC1A2, MGST2, HAGH, GCLM
GOTERM_BP_DIRECT	GO:0042711~maternal behavior	5	0.123854	0.0150127	BRINP1, DBH, NR3C1, KALRN, NPAS1
GOTERM_BP_DIRECT	GO:0090521~podocyte cell migration	5	0.123854	0.0150127	KANK1, ANLN, DAAM2, TESK1, WDPCP
GOTERM_BP_DIRECT	GO:0007266~Rho protein signal transduction	15	0.371563	0.0150129	RIPOR1, ARHGEF12, PLEKHG5, RHOG, ARHGAP35, GNA13, EPS8, ADGRG1, BCL6, PDPN, CDC42EP3, NCK2, CDH13, TAX1BP3, EPS8L3
GOTERM_BP_DIRECT	GO:0007032~endosome organization	13	0.322021	0.0152932	PLEKHF2, WASHC4, RAB5B, PLEKHF1, AKTIP, DNAJC13, PLEKHA3, TMEM127, HOOK1, CHMP2B, STX6, ZCCHC4, SQSTM1
GOTERM_BP_DIRECT	GO:0032753~positive regulation of interleukin-4 production	9	0.222938	0.0161576	SYK, TNFSF4, RARA, CD28, PRKCQ, ZP3, FOXP3, PRKCZ, HAVCR2
GOTERM_BP_DIRECT	GO:0090314~positive regulation of protein targeting to membrane	8	0.198167	0.0162701	TCAF1, C2CD5, MYO1C, CDK5, AKT2, CIB1, FYN, MFF
GOTERM_BP_DIRECT	GO:0007416~synapse assembly	12	0.29725	0.0168651	GNPAT, CDK5, CDH2, BDNF, ERBB4, CDH1, PLXNC1, PLXNA4, SDK2, CBLN2, ADD2, ADGRL3
GOTERM_BP_DIRECT	GO:0016197~endosomal transport	15	0.371563	0.0180153	ITSN2, WASHC4, ITSN1, EPS15L1, EHD2, EHD3, EHD4, NSG2, MYO5B, REPS2, SNX9, TMCC1, EPS15, AP5S1, PICALM
GOTERM_BP_DIRECT	GO:0007264~small GTPase-mediated signal transduction	26	0.644043	0.0182353	BCAR3, DOCK4, GDI1, DOCK9, RASGRF2, GDI2, ARHGAP18, LIPA, RASGRP1, ARHGAP12, RAC2, PLCE1, RALGPS1, VAV3, RALBP1, RHOG, RHOH, VAV1, TIAM2, RUFY1, ARHGAP32, TIAM1, CCDC88C, PIGF, RAPGEF6, DOCK1
GOTERM_BP_DIRECT	GO:0006898~receptor-mediated endocytosis	13	0.322021	0.018759	SCARB2, RALBP1, STAB2, HIP1R, DNAJC13, LDLRAD3, VLDLR, SORL1, MRC1, TMEM108, SNX9, CD36, WASF1
GOTERM_BP_DIRECT	GO:0006974~DNA damage response	37	0.916522	0.0198071	YAP1, CCNK, CIB1, FMN2, NPAS2, PAK1, CCND1, OARD1, CHCHD6, HMCES, SUSD6, RBBP6, ZNF385A, NKX3-1, IER3, VAV3, LYN, SLF2, CCDC13, NCOA6, DDX11, MSL2, NFATC2, VRK2, PPP4R3B, WDR76, FOXP1, PIAS1, ETAA1, APC, BCL6, TTC5, MAPKAPK2, SPDYA, TRIP12, CEP63, CLOCK
GOTERM_BP_DIRECT	GO:0000226~microtubule cytoskeleton organization	33	0.817439	0.0199629	TUBAL3, CETN1, CETN2, ULK4, PRKCZ, SPATA7, TUBB8, NUAK2, CHEK1, MAP7, TOGARAM2, TOGARAM1, APC2, LOC720677, CMTM4, DCLK2, LOC712533, TUBA4A, PARD3B, SNRK, FER, MELK, TTLL4, PARD3, MAP7D2, TACC3, SIK3, LOC106996033, MAPT, CALM1, TTLL9, LOC708952, LOC722862
GOTERM_BP_DIRECT	GO:0006536~glutamate metabolic process	6	0.148625	0.0203691	GCLC, TAT, DGLUCY, FPGS, ALDH18A1, GCLM
GOTERM_BP_DIRECT	GO:0006417~regulation of translation	21	0.520188	0.0210179	RBM38, PIWIL1, CYFIP1, PIWIL3, CNOT6L, MSI2, FOXO3, MIF4GD, DAZL, RGS2, ALKBH5, DAP, MKNK1, CNOT3, MKNK2, NCK2, HABP4, IGF2BP3, LSM14B, PAIP1, TNRC6B
GOTERM_BP_DIRECT	GO:0016579~protein deubiquitination	22	0.544959	0.0210507	USP35, USP46, USP25, USP36, OTUD5, USP53, USP20, KLHL36, USP31, USP21, USP44, USP11, USP34, USP2, USP45, UCHL3, UCHL1, LOC114675441, USP1, USP30, LOC106996741, LOC114675428
GOTERM_BP_DIRECT	GO:0010592~positive regulation of lamellipodium assembly	9	0.222938	0.0213911	CYFIP1, ACTR2, NCKAP1, RAC2, PLCE1, PIK3R1, ACTR3B, WASF2, MTOR
GOTERM_BP_DIRECT	GO:0010273~detoxification of copper ion	7	0.173396	0.0222468	MT2A, LOC709273, LOC709619, MT1M, LOC709451, MT1X, LOC100424768
GOTERM_BP_DIRECT	GO:0023051~regulation of signaling	7	0.173396	0.0222468	PREX2, PREX1, ERBB4, MINK1, LMO7, CBLB, TNIK
GOTERM_BP_DIRECT	GO:0045820~negative regulation of glycolytic process	7	0.173396	0.0222468	FLCN, TRIM63, NCOR1, DDIT4, CBFA2T3, GIT1, IER3
GOTERM_BP_DIRECT	GO:0071276~cellular response to cadmium ion	8	0.198167	0.0222905	MT2A, LOC709273, LOC709619, MT1M, LOC709451, HMOX1, MT1X, LOC100424768
GOTERM_BP_DIRECT	GO:0005978~glycogen biosynthetic process	8	0.198167	0.0222905	UGP2, THRA, PPP1R3C, AGL, PGM2, AKT1, ACADM, GYG1
GOTERM_BP_DIRECT	GO:0043124~negative regulation of canonical NF-kappaB signal transduction	16	0.396334	0.0223517	THRA, USP20, KLHL36, RIOK3, STAT1, DAB2IP, NR1H4, OTUD7B, RHOH, NLRC3, NFKBIA, PYCARD, PPM1B, CASP8, TRIM59, ZMYND11
GOTERM_BP_DIRECT	GO:0006915~apoptotic process	57	1.41194	0.022364	CYFIP2, ERRFI1, TNFAIP8, TRADD, PTEN, CIB1, CASP8, AIFM1, CASP2, IFT57, RNF152, ZNF385A, TP63, SH3GLB1, BNIP3L, RIPK2, IGFBP3, UNC5C, CD2AP, TNFRSF1A, PLSCR1, MELK, PLSCR3, IRF1, MADD, DDIT4, ELMO1, TAX1BP1, RARB, VDAC1, BIRC2, SHC4, RNF34, CUL1, SLC5A11, HSD17B4, PRICKLE1, STK4, FOXO1, AURKA, SYCE3, BAG6, DMD, RFFL, DEDD, WWOX, EGLN3, CDKN2B, BAD, TPRG1, CIDEC, XKR8, NR4A1, ERCC3, PMP22, EBAG9, …
GOTERM_BP_DIRECT	GO:0033209~tumor necrosis factor-mediated signaling pathway	13	0.322021	0.022779	TRAF3IP2, STAT1, TRADD, ACTN4, TNFRSF11A, FOXO3, RNF41, TNFRSF1A, NFKBIA, PYCARD, TRAF3, TIFA, CDIP1
GOTERM_BP_DIRECT	GO:0000281~mitotic cytokinesis	13	0.322021	0.022779	ANK3, CIT, ANLN, APC, INCENP, KIF4A, RAB35, TRIM36, SNX9, ECT2, MYH10, MAP9, BBS4
GOTERM_BP_DIRECT	GO:0015914~phospholipid transport	11	0.27248	0.0231288	PRELID2, SCARB1, ATP8B4, ATP8A2, ATP8A1, OSBPL5, PITPNM3, OSBP, ATP10B, ATP11B, ATP9A
GOTERM_BP_DIRECT	GO:0043066~negative regulation of apoptotic process	61	1.51102	0.023647	AVEN, FANK1, MRE11, HSPB6, ARAF, AKR1B1, LOC715953, HSPB1, CIB1, FMN2, IGF1R, PTMS, SIN3A, CD38, CCN1, IER3, BNIP3L, CAMK1D, TSC22D1, LOC100427847, RNF144B, ARHGAP10, RASA1, CAT, RARA, TAX1BP1, RARB, NAA35, ATF5, BIRC2, STK40, CSF1R, SHC1, PSEN2, VTCN1, PIK3R1, LOC100425959, ASCL1, FOXO1, HSP90B1, AURKA, PLAC8, BAG6, BCL2L10, MAPK8, NUAK2, PRAMEF12, ERBB4, CXCR2, TAF9B, BARD1, BAD, RHBDD1, NR1H4,…
GOTERM_BP_DIRECT	GO:0008285~negative regulation of cell population proliferation	47	1.16423	0.023767	BTG4, DDR1, CSF1R, TES, SMARCB1, ZBTB49, WWC2, PTEN, CIB1, AMBRA1, NDRG1, TOB1, FGFRL1, RERG, CDH5, ADGRG1, FRZB, ERBB4, TMEM127, ABI3BP, CCN6, SLIT3, SH2B3, NKX3-1, MINAR1, MAP2K1, CDKN2B, AGTPBP1, TESC, MAGI2, INCA1, C18H18ORF54, SMARCA2, CBFA2T3, RNF41, BMP5, LOC114675413, TFAP4, APC, ALDH1A2, CDH13, TAX1BP3, NUPR1, COPS8, ATF5, GSDME, SKAP2
GOTERM_BP_DIRECT	GO:0045332~phospholipid translocation	10	0.247709	0.0254502	ATP8B4, ABCC1, ATP8A2, ATP8A1, TMEM30B, ABCB4, ABCA4, ATP10B, ATP11B, ATP9A
GOTERM_BP_DIRECT	GO:0007275~multicellular organism development	33	0.817439	0.0265314	DDR1, CSF1R, NOTCH4, CRX, GREB1L, FSTL4, CDH8, IGF1R, CDH5, CDH3, CDH2, CDH1, ERBB4, OTX2, ROS1, PDGFRA, NTRK2, JAG1, EYA1, EYA2, SIAH3, SIAH2, GREB1, STYK1, SPRY4, PPDPF, CDH10, CDH11, CDH13, TEK, CDH17, CDH18, CDH19
GOTERM_BP_DIRECT	GO:0048812~neuron projection morphogenesis	13	0.322021	0.0273993	GPM6A, NCKAP1, ANKRD27, PPP1R12A, UBE2D4, BDNF, MINK1, DAB2IP, NYAP2, SHTN1, TNIK, GAS7, MAP4K4
GOTERM_BP_DIRECT	GO:0043001~Golgi to plasma membrane protein transport	9	0.222938	0.0277172	BBS2, PREPL, GOLPH3, RAB31, GOLPH3L, ANK3, GOLGA7, MIF4GD, BLZF1
GOTERM_BP_DIRECT	GO:0030178~negative regulation of Wnt signaling pathway	11	0.27248	0.0285778	APC2, WWOX, FGF9, APC, CTNNBIP1, TAX1BP3, BARX1, NLK, NKD1, SOX30, TRABD2A
GOTERM_BP_DIRECT	GO:1902018~negative regulation of cilium assembly	8	0.198167	0.0296893	YAP1, MPHOSPH9, GDI2, TBC1D7, TESK1, AKT1, MAP2K7, CEP97
GOTERM_BP_DIRECT	GO:0061178~regulation of insulin secretion involved in cellular response to glucose stimulus	6	0.148625	0.0304174	THRA, LRP5, EFNA5, SIDT2, ADCY5, SLC9B2
GOTERM_BP_DIRECT	GO:0010762~regulation of fibroblast migration	6	0.148625	0.0304174	GNA13, FER, WDPCP, PRR5L, APPL2, APPL1
GOTERM_BP_DIRECT	GO:0009966~regulation of signal transduction	21	0.520188	0.030736	IGBP1, CCNK, KCNIP2, MINK1, SPRY4, KCNIP4, DTNBP1, FBXO43, NCALD, CNKSR2, UGCG, MFHAS1, GRK3, GPC5, GPC4, TNIK, ZMYND11, GPC6, STK32C, DAND5, MAP4K4
GOTERM_BP_DIRECT	GO:0007018~microtubule-based movement	21	0.520188	0.030736	DYNC2H1, DYNC1I2, DNAH12, DNAH11, DNAH7, DNAH17, CMTM4, DYNLT3, KIF14, DNHD1, KIF6, CENPE, KLC2, KIF16B, KIF3A, KIF5B, KIF4A, KIF26B, KIF13B, KIF21B, KIFC3
GOTERM_BP_DIRECT	GO:0051247~positive regulation of protein metabolic process	7	0.173396	0.0309003	NFKBIA, MAPK8, MAPK7, UHRF1, NR1H3, MTOR, KLF2
GOTERM_BP_DIRECT	GO:0043651~linoleic acid metabolic process	7	0.173396	0.0309003	GSTM4, GSTM2, PNPLA8, ALOX15, LOC713683, ALOXE3, ALOX15B
GOTERM_BP_DIRECT	GO:0051056~regulation of small GTPase mediated signal transduction	12	0.29725	0.0309336	PREX2, VAV3, PREX1, RALGAPB, SIPA1L1, CHN2, MCF2, ARHGEF3, ARHGAP18, ARHGAP28, MYO9A, GARNL3
GOTERM_BP_DIRECT	GO:0009410~response to xenobiotic stimulus	20	0.495417	0.0309652	VAV3, EMX1, ERRFI1, SLC12A5, TRAF3IP2, TRPA1, ROGDI, SLC1A2, NFATC2, PTPRM, PRICKLE1, FOS, TENT4A, LIPA, GCLC, CCND1, PDE3A, CD38, DMD, GCLM
GOTERM_BP_DIRECT	GO:0021955~central nervous system neuron axonogenesis	4	0.0990835	0.0313892	ARHGEF28, B4GALT6, ARHGAP35, NDEL1
GOTERM_BP_DIRECT	GO:0097120~receptor localization to synapse	4	0.0990835	0.0313892	DLG1, NLGN1, DLG2, DLG3
GOTERM_BP_DIRECT	GO:0071681~cellular response to indole-3-methanol	4	0.0990835	0.0313892	JUP, CDH1, CTNNA1, BRCA1
GOTERM_BP_DIRECT	GO:0036498~IRE1-mediated unfolded protein response	4	0.0990835	0.0313892	ERN1, PTPN1, DNAJC10, PARP16
GOTERM_BP_DIRECT	GO:0032456~endocytic recycling	15	0.371563	0.034709	DENND1C, ANKRD27, STX16, DENND1A, CMTM6, EHD2, EHD3, EHD4, VPS50, RAB35, STX6, CCDC93, RAB8A, RAB11FIP4, VPS35L
GOTERM_BP_DIRECT	GO:0030073~insulin secretion	11	0.27248	0.0348781	SMAD2, SERP1, SNX19, RAB3A, ACVR1C, STXBP3, PDX1, ILDR2, HNF1B, HNF1A, SYTL4
GOTERM_BP_DIRECT	GO:0007613~memory	16	0.396334	0.0352033	SLC24A2, BDNF, CRTC1, PLK2, ROGDI, DTNBP1, VPS13B, ITPR3, DBH, NTAN1, SORCS3, KALRN, SLC8A2, NETO1, SYT11, ITGA5
GOTERM_BP_DIRECT	GO:0009409~response to cold	9	0.222938	0.035227	PLAC8, TMEM135, SLC27A1, PCSK1N, TRPA1, THRA, ACADM, LIPA, CDH8
GOTERM_BP_DIRECT	GO:0060586~multicellular organismal-level iron ion homeostasis	9	0.222938	0.035227	EPB42, EPAS1, HJV, SLC11A2, HMOX1, FBXL5, NEO1, BMP6, PICALM
GOTERM_BP_DIRECT	GO:0030154~cell differentiation	80	1.98167	0.0373573	SEMA5A, SUV39H2, RIPOR2, THRA, TGFB1I1, CIB1, MSANTD3, CHRDL1, ELK3, ELK4, HHEX, NHSL2, RNF114, FGF9, DPYSL2, NKX1-1, GABPA, NKX3-1, PDGFRA, HES6, SYK, TESC, STRBP, RFX3, TYK2, ETV2, ETV5, TMEFF1, ELF1, PALLD, ELF5, PPDPF, LOC719262, RARA, ERF, RARB, ZFPM2, UHRF2, NOTCH4, NR1I2, ILDR2, GATA2, EFNA5, RASGRP1, FSTL4, GNA13, BAG6, ADGRG1, ACVR1C, SOHLH2, FYN, CTNNA2, NKX2-2, RBM38, LYN, SMAD2, NTRK2…
GOTERM_BP_DIRECT	GO:0006470~protein dephosphorylation	27	0.668813	0.0377171	PTPRR, PTEN, PTPRM, PTPRK, PTPRH, DUSP16, PTPRG, DUSP10, PPP4R1, PPP2R1B, ILKAP, PTPN1, DUSP3, PPP2R5D, PPP2R5C, PPP4R3B, CDC25C, SSH2, DUSP7, SSH1, FAM220A, DUSP22, PPM1B, LOC699403, UBLCP1, PTPN5, PTPN3
GOTERM_BP_DIRECT	GO:0008104~protein localization	26	0.644043	0.038727	CCDC120, ITSN1, SEPTIN12, PRPF19, SEPTIN11, CEP128, SEPTIN10, AKAP11, SIN3A, TP53INP2, CTNNA1, DMD, BBS7, TNS4, LRBA, SEPTIN3, AXIN2, SEPTIN9, SEPTIN8, PARD3B, NIN, BBS10, BIN3, ERCC3, BCL6, PARD3
GOTERM_BP_DIRECT	GO:0050680~negative regulation of epithelial cell proliferation	14	0.346792	0.0396209	CDKN1C, CDKN2B, B4GALT1, TINF2, DAB2IP, PDX1, PEX2, STK4, MTSS1, FLCN, DLG1, DUSP10, TRIM24, NKX3-1
GOTERM_BP_DIRECT	GO:0030324~lung development	16	0.396334	0.0404856	SMAD2, PDGFRA, CCBE1, RAB3A, ANXA2, EPAS1, DNAAF1, LOXL3, LIPA, BAG6, HSD11B1, FGF9, ALDH1A2, PDPN, ZFPM2, BMPR1A
GOTERM_BP_DIRECT	GO:0034599~cellular response to oxidative stress	17	0.421105	0.0404956	ATF2, TMEM161A, GSR, ATP2A2, PRR5L, SLC7A11, VRK2, FOXO3, SOD2, HIF1A, ETV5, MSRA, STK24, ARL6IP5, STX2, PPARGC1A, RBM11
GOTERM_BP_DIRECT	GO:0070262~peptidyl-serine dephosphorylation	5	0.123854	0.041422	PPP6C, LOC114675532, PPP2R2C, PPP2R2B, PPP2R2A
GOTERM_BP_DIRECT	GO:0034440~lipid oxidation	5	0.123854	0.041422	ALOX15, LOC713683, ALOXE3, ALOX15B, PLA2G7
GOTERM_BP_DIRECT	GO:0099536~synaptic signaling	5	0.123854	0.041422	DTNA, DTNB, RAB3GAP2, DMD, UTRN
GOTERM_BP_DIRECT	GO:0035739~CD4-positive, alpha-beta T cell proliferation	5	0.123854	0.041422	RIPK2, CD28, PRKCQ, CBLB, FOXP3
GOTERM_BP_DIRECT	GO:0051642~centrosome localization	7	0.173396	0.041484	NIN, SUN1, CMTM4, NDE1, KIF5B, AURKA, NDEL1
GOTERM_BP_DIRECT	GO:1990138~neuron projection extension	7	0.173396	0.041484	DDR1, EMX1, SPAG6, PRICKLE1, PRKCZ, AURKA, NDEL1
GOTERM_BP_DIRECT	GO:2000781~positive regulation of double-strand break repair	6	0.148625	0.0430906	SLF2, KHDC3L, DDX11, SPIRE1, FMN2, SPIDR
GOTERM_BP_DIRECT	GO:2000114~regulation of establishment of cell polarity	6	0.148625	0.0430906	RIPOR2, SHTN1, KANK1, CDH5, WDPCP, RICTOR
GOTERM_BP_DIRECT	GO:0001556~oocyte maturation	6	0.148625	0.0430906	MOS, ZAR1L, PDE3A, PABPC1L, FOXO3, BRCA2
GOTERM_BP_DIRECT	GO:2000045~regulation of G1/S transition of mitotic cell cycle	9	0.222938	0.0439975	CDKN2B, ID2, E2F1, PSME1, KIF14, AMBRA1, MNAT1, APPL2, APPL1
GOTERM_BP_DIRECT	GO:0006906~vesicle fusion	9	0.222938	0.0439975	VAMP8, STX12, STX17, STX16, SYT11, CAV2, STX7, STX6, STX5
GOTERM_BP_DIRECT	GO:0032007~negative regulation of TOR signaling	9	0.222938	0.0439975	MINAR1, FLCN, LOC114675413, TMEM127, DDIT4, TBC1D7, TNFAIP8L1, RAPGEF6, HIF1A
GOTERM_BP_DIRECT	GO:0120162~positive regulation of cold-induced thermogenesis	19	0.470647	0.0450028	KDM6B, THRA, SYK, EPAS1, EBF2, EHMT1, OXT, ELOVL6, GPR3, DBH, PLAC8, GATM, CNOT3, MFAP2, CD36, HADH, PPARGC1A, APPL2, SFXN5
GOTERM_BP_DIRECT	GO:0006887~exocytosis	22	0.544959	0.0473631	RAB3B, STX17, RAB3D, MICAL3, RAB27A, RAB27B, MIA3, SCAMP1, LIN7C, SYTL4, SYTL3, CPLX4, SYTL2, RIMS3, RAB40C, RAB15, EXOC4, EXOC3, STXBP6, STX2, RAB8A, LLGL2
GOTERM_BP_DIRECT	GO:0043408~regulation of MAPK cascade	10	0.247709	0.0477389	CSF1R, PAK1, GRAP2, MINK1, VRK2, TNIK, STK4, STK40, MAP4K4, RNF41
GOTERM_BP_DIRECT	GO:0040029~epigenetic regulation of gene expression	8	0.198167	0.0490391	KDM1B, HDAC11, MSL2, KPNA7, SIRT5, EZHIP, CGGBP1, KLF2
GOTERM_BP_DIRECT	GO:0010498~proteasomal protein catabolic process	8	0.198167	0.0490391	BRINP1, THRA, CUL5, CUL1, PRPF19, SOCS6, TRIM21, RNF41
GOTERM_BP_DIRECT	GO:0043113~receptor clustering	8	0.198167	0.0490391	DLG1, DLG2, DLG3, CDK5, LRRC7, MAGI2, WDR19, ITGAL
