# Supplementary material
Source: Research Square preprint supplement (doi:10.21203/rs.3.rs-7771199/v1)
Supplement: Supplementary file 3 [file 3413175b5313db743b05465a.xlsx]

## Sheet: Morula-activated genes
Morula-activated genes in Young monkey
ABHD13
ABHD17C
ACAA2
ACAD9
ACP6
ACSL4
ACTN1
ACTR8
ADAP2
ADCK1
ADCK2
ADCK5
ADM
ADNP
ADSS
AFG3L2
AFTPH
AGPAT5
AK3
AKR7A2
ALDH3A2
ALG14
ALG6
ALG8
AMDHD2
AMOT
AMT
ANAPC16
ANAPC2
AP1S1
APBA3
APEH
APELA
APOC1
APOE
APRT
ARFGEF1
ARMC6
ARNT
ASNSD1
ATMIN
ATOX1
ATP6AP1
ATP6V0D2
ATP6V1A
ATP6V1B1
ATXN10
AUH
AURKAIP1
BABAM2
BAX
BCL2L14
BCL2L15
BCL7B
BEX1
BLOC1S2
BOK
BORCS7
BRMS1L
BROX
C15H9orf116
C16H17orf62
C2H3orf33
C2H3orf52
C7H15orf40
C7H15orf65
CA13
CAB39
CAB39L
CADM1
CAPG
CASP6
CCAR2
CCDC107
CCDC115
CCDC22
CCHCR1
CCN2
CCND3
CD151
CD300LF
CD300LG
CD53
CDC16
CDC42EP4
CDK5RAP2
CDKN1A
CDKN3
CEBPZOS
CFAP410
CFAP45
CFLAR
CGRRF1
CHCHD10
CHD1L
CHDH
CHMP4A
CHMP6
CHST5
CIAO3
CISD3
CISH
CKLF
CLDN4
CLUH
CNDP2
CNPY2
CNR2
COA5
COASY
COG4
COMMD10
COPB1
COQ3
COQ8B
CORO1B
COX20
CPNE1
CPNE3
CPSF1
CPSF7
CPVL
CRELD1
CRIP1
CTSA
CTSD
CTSK
CUEDC2_1
CUL4A
CYB5R1
CYB5R4
DARS2
DBNL
DCAF11
DCPS
DHCR24
DHRS3
DHRS7B
DHX30
DIAPH1
DNAJC3
DPH6
DPP4
DPPA4
DSP
DUS3L
DUS4L
DUSP6
DXO
ECPAS
EED
EEF1AKNMT
EFR3A
EGFL8
EGLN2
EGLN2_1
EID1
EIF1AY
EIF3B
EIF4G3
ELF3
ELOVL7
ELP1
EME1
ENPP4
ERBIN
ERLEC1
ERLIN2
ERMARD
ESRRB
EXT2
F2RL1
FADD
FAM173A
FAM3B
FAM92A
FASTK
FASTKD3
FBXO10
FBXO22
FCGR2B
FCGR3
FEZ1
FGFR2
FGFR3
FIBP
FITM2
FKBP3
FKBP5
FKTN
FLNA
FLNB
FMO5
FOLR1
FOXRED1
FRA10AC1
FRRS1
FUOM
GALE
GALK1
GALT
GATB
GATD3A
GDE1
GDF3
GFPT1
GINS1
GJA1
GLB1
GLT8D1
GM2A
GMPPB
GNMT
GNPNAT1
GOT1
GPAA1
GPD2
GPRC5C
GPT2
GRN
GSS
GSTZ1
GTF2H2
GTF2H4
GTPBP8
GUF1
GYG2
H2AFY
HEATR5B
HECTD1
HEXA
HINT3
HIST3H2A
HK1
HMBS
HMGXB3
HNF4A
HPCAL1
HRAS
HSD17B11
HSPB3
HTATIP2
HUWE1
HYAL2
IBTK
IFRD2
IFT43
IGF2BP1
IL6
ILVBL
IMMP2L
IMPACT
IMPAD1
INIP
INTS11
INTS13
INTS6L
INTS7
IPO4
IPO5
IPO7
IPO9
ITFG1
ITGB7
JMJD4
JMJD7
KCTD6
KIR2DL4
KIT
KLF8
KRTCAP3
LAMB1
LAMC1
LANCL1
LASP1
LATS1
LBR
LEP
LIM2
LIN9
LIPH
LIPT2
LMAN2L
LMNA
LOC100423098
LOC100423423
LOC100424957
LOC100425072
LOC100425085
LOC100427190
LOC100429260
LOC100430105
LOC100430373
LOC100430397
LOC106995218
LOC106995512
LOC106995967
LOC106996192
LOC106996374
LOC106996824
LOC106996902
LOC106997221
LOC106998520
LOC106998813
LOC106999151
LOC107000431
LOC114669721
LOC114669729
LOC114669758
LOC114670433
LOC114670684
LOC114670689
LOC114670696
LOC114671166
LOC114671351
LOC114671440
LOC114671602
LOC114672050
LOC114672188
LOC114672189
LOC114672190
LOC114672892
LOC114673496
LOC114674062
LOC114674257
LOC114674454
LOC114674455
LOC114675031
LOC114675075
LOC114675086
LOC114675087
LOC114675316
LOC114675333
LOC114675366
LOC114675448
LOC114675522
LOC114675568
LOC114677044
LOC114677128
LOC114677344
LOC114677350
LOC114677691
LOC114678642
LOC114678803
LOC114678824
LOC114679145
LOC114679606
LOC114679684
LOC693272
LOC693415
LOC693438
LOC693472
LOC693699
LOC694035
LOC694565
LOC694628
LOC694706
LOC694734
LOC695670
LOC695732
LOC695989
LOC696015
LOC696151
LOC696283
LOC696504
LOC696878
LOC697564
LOC697761
LOC697829
LOC698075
LOC698099
LOC698520
LOC698530
LOC698715
LOC698792
LOC698928
LOC699695
LOC700233
LOC700872
LOC701105
LOC701494
LOC701866
LOC702125
LOC702581
LOC702606
LOC702932
LOC703706
LOC703919
LOC703968
LOC704365
LOC704783
LOC705400
LOC705465
LOC705596
LOC705840
LOC706082
LOC706177
LOC706528
LOC707117
LOC707129
LOC707358
LOC707493
LOC708045
LOC708065
LOC708140
LOC708603
LOC708874
LOC709045
LOC710137
LOC711043
LOC711183
LOC711309
LOC711695
LOC712614
LOC712631
LOC713028
LOC713695
LOC713714
LOC713984
LOC714188
LOC714656
LOC714691
LOC715855
LOC716589
LOC717595
LOC717842
LOC718082
LOC718356
LOC718596
LOC718712
LOC718926
LOC720015
LOC720244
LOC721192
LOC721315
LOC722212
LOC723733
LOXL2
LPAR2
LPCAT3
LPGAT1
LRIF1
LRRC14
LY6E_1
LYN
LYPLA1
LYPLA2
M6PR
MAGEH1
MAP2K6
MAP3K8
MARCKS
MB21D2
MCEE
MCUR1
MDK
MECR
MED17
MED22
MED24
MFSD8
MGAT2
MIR106B
MKI67
MKKS
MLST8
MOB3B
MOGAT2
MPDU1
MRM1
MRPL10
MRPS30
MSX2
MT1JP
MTFMT
MTFP1
MTG2
MTHFD1
MVD
MYCBP2
MYH9
MYL7
MZT1
N6AMT1
NAA25
NADK2
NAGA
NAXE
NBN
NCOA1
NDC1
NDUFAF2
NDUFAF6
NENF
NFE2L2
NGEF
NIPSNAP2
NIT1
NIT2
NME6
NMI
NMRK1
NMT1
NOTO
NPPB
NT5DC1
NUDCD3
NUDT16L1
NUDT22
NUDT3
NUP107
OGFOD3
OLFM2
OSGEP
OSR2
OXSM
P4HA2
PAFAH1B1
PAGE1
PARVA
PCBD1
PCBD2
PCED1B
PCLAF
PCYOX1
PCYT2
PDGFA
PDP2
PDS5B
PEMT
PEPD
PEX1
PEX5
PFAS
PFKL
PGAM5
PGM1
PIGO
PIGV
PINK1
PKIG
PLA2G15
PLBD2
PLK4
PMAIP1
PMPCB
POLE2
POLR1B
POLRMT
POMK
PON2
PPA2
PPP1R14C
PPP2CB
PPP2R5A
PPP2R5E
PPP5C
PRCP
PRKDC
PRMT3
PRMT9
PRXL2A
PSMB10
PSMC3IP
PSME4
PSMG4
PSORS1C2
PTGR2
PTS
PYCR3
QRSL1
RAB30
RAB3IP
RAB43
RAB9A
RABGGTA
RAD9A
RBBP9
RBKS
RBM44
RBM45
RBM47
RBP4
RCN2
RDH10
RDH11
REEP5
REPS1
RETSAT
REXO4
RHEX
RHOT2
RHOV
RIN2
RNASE9
RNF121
RNF130
RNF26
RNF40
RNF5
RO60
RPAP3
RPUSD1
RREB1
RTN4IP1
RXYLT1
SAP25
SASH1
SATB2
SCP2
SCYL3
SDHD_1
SEC11C
SFXN1
SGTB
SH3RF1
SHKBP1
SHLD2
SKIV2L
SLC18B1
SLC23A2
SLC25A10
SLC25A29
SLC27A4
SLC27A5
SLC29A1
SLC30A5
SLC35B2
SLC35B3
SLC37A4
SLC38A7
SLC39A7
SLC41A2
SLC4A11
SLC52A2
SLC6A8
SLC7A2
SLCO4C1
SLTM
SMARCAD1
SMARCAL1
SMC6
SMCO4
SMIM1
SMIM3
SMPDL3A
SNX17
SNX18
SNX24
SOX2
SPIC
SPOUT1
SPTAN1
SPTBN1
SPTLC2
SPTSSA
SRD5A3
SRR
ST3GAL6
STAP2
STAU2
STOM
STUB1
SUMO3
SUSD2
SUZ12
SWSAP1
TACO1
TADA3
TANGO2
TARS2
TATDN1
TEAD4
TEDC1
TEDC2
TET1
TEX261
TEX50
TFCP2
THEM6
THOP1
TIGD3
TJP2
TM9SF1
TM9SF3
TMBIM4
TMED1
TMED3
TMED4
TMEM150C
TMEM161B
TMEM165
TMEM19
TMEM203
TMEM35A
TMEM37
TMEM43
TMEM45B
TMEM54
TMTC3
TMX4
TNS3
TOE1
TOP1MT
TOR1AIP1
TPM4
TPR
TPST2
TRAF2
TRAPPC6A
TRIB1
TRIM27
TRIM32
TRIM5
TRMT61A
TRNAA-AGC_8
TRNAC-GCA_17
TRNAC-GCA_7
TRNAR-ACG_5
TSEN54
TSPAN14
TSR3
TSTA3
TTC12
TTC19
TTLL12
TUT1
TYRO3
UBAC1
UBASH3B
UBE3A
UBE3C
UBL4A
UBQLN4
UBXN4
UFSP2
UNC45A
UPP1
URGCP
URI1
USP38
USP5
VARS
VCL
VPS33A
VPS36
VPS39
VPS51
WDR13
WDR36
WDR4
WDR54
WDR6
WDR73
WWP1
WWTR1
XAGE5
XPNPEP1
XPNPEP3
XPOT
XYLT2
YBEY
YDJC
ZDHHC12
ZDHHC24
ZDHHC9
ZFAND1
ZFAND2B
ZFP57
ZFYVE27
ZGPAT
ZMPSTE24
ZMYM1
ZMYND8
ZNF140
ZNF232
ZNF326
ZNF511
ZNF623
ZNF7
ZNF8
ZSCAN16
ABHD12
ABITRAM
ACBD6
AHCY
AIMP1
AK2
AK4
AKAP12
AP3S2
ARFIP2
ARPC1A
ARPC1B
ARPC2
ATG10
ATP5F1B
ATP5F1D
ATP5MC3
ATP5MF
ATP5PB
ATP5PO
ATP6V0B
ATP6V0E1
BNIP3
BOLA3
C3H7orf50
CALR
CAPZA2
CCDC58
CCNC
CCPG1
CCT4
CCT7
CDC123
CHCHD1
CHID1
CHORDC1
CKB
COMT
COX16
COX5A
CSE1L
CTPS1
CTSH
CTSL
CTSV
CYC1
DBF4
DDOST
DLAT
DNMT3L
DPPA2
DRG2
DTYMK
DUSP1
DUSP11
ECHS1
EEF1B2
EEF1G
EIF2B3
EIF2S1
EIF3D
EIF3E
EPCAM
ETFB
EXOSC8
FABP5
FAH
FAM50A
FARSA
FASTKD2
FDPS
FTH1
FXN
GALM
GATA6
GCSH
GLRX2
GLUD1
GNPDA1
GPS1
GSTO1
GTF2H5
HADHB
HAT1
HAVCR1
HAX1
HDDC2
HIKESHI
HK2
HSD17B10
HSPA14
HSPA9
HSPD1
HSPE1
IDH3A
IDH3B
ILK
IMPDH2
KRT18
KRT8
LAMP1
LDHA
LDHB
LETM1
LMAN2
LOC100425407
LOC100426639
LOC100429752
LOC106993989
LOC106994675
LOC106994967
LOC106995978
LOC106996044
LOC106996165
LOC114669843
LOC114671716
LOC114674310
LOC114674730
LOC114674955
LOC114675364
LOC114675372
LOC114675515
LOC114675599
LOC114677470
LOC114678366
LOC693330
LOC693802
LOC696144
LOC696854
LOC696935
LOC696959
LOC697687
LOC699053
LOC699195
LOC699693
LOC701223
LOC701691
LOC702654
LOC703127
LOC705546
LOC712661
LOC712840
LOC713313
LOC714576
LOC720019
LOC721815
LOC722074
LRPAP1
LRPPRC
LSM5
MAPRE1
MDH2
MIF
MRPL1
MRPL23
MRPL27
MRPL28
MRPL32
MRPL33
MRPL38
MRPL45
MRPL47
MRPL9
MRPS15
MRPS17
MRPS25
MRPS27
MRPS34
MRPS5
MRRF
MT2A
MTCH2
MTG1
MTX2
MYDGF
MYL12A
MYL6
NAA10
NAE1
NANOG
NDUFA12
NDUFA4
NDUFA9
NDUFB3
NDUFB4
NDUFB5
NDUFB7
NDUFB8
NDUFC2
NDUFS6
NDUFS8
NDUFV1
NLRP2
NLRP7
NOC4L
NPC2
NUDT1
NUDT4
NUDT5
NUDT9
OAT
OLA1
OSTC
PAAF1
PAGE2B
PDCD2L
PDHB
PERP
PET117
PGK1
PHPT1
PMPCA
PNPT1
POLR2I
POU5F1
PPCS
PPIL1
PPP1CA
PPP1R14A
PPT1
PSMA1
PSMA4
PSMB5
PSMB7
PSMC1
PSMD14
PTCD2
RANBP1
RPL22L1
RPL26L1
RPL4
RPL5
RPN2
RPP25L
RPS4Y1
RPS4Y2
RPSA
RUVBL1
SAAL1
SCPEP1
SDHAF2
SDHD
SELENOT
SEPHS1
SERINC3
SFXN4
SH3BGRL2
SHISA5
SHMT1
SLC25A3
SLC35B1
SLC39A1
SLC39A4
SLIRP
SMIM20
SNX2
SOAT1
SPCS1
SPG21
SRM
SSBP1
TAGLN2
TARBP2
TBL3
TCEAL8
TFAM
TFB1M
TIMM17A
TIMM17B
TIMM8B
TIMM8B_1
TIMMDC1
TMBIM1
TMED9
TMEM126A
TMEM14B
TMEM14C
TMEM219
TMEM45A
TRAPPC2L
TRIML2
TUBB
TUBB4A
UQCR
UTP15
VDAC2
VDAC3
VPS28
WDR12
WDR18
WDR77
YARS
YIF1A
YIPF3
ZPR1

## Sheet: C1-C4 gene list
List of morula-activated genes with different expression patterns
C1	C2	C3	C4
ADCK1	RNASE9	ABHD12	ACP6
ADM	ELOVL7	ABHD13	ACSL4
APOC1		ABHD17C	ADNP
ATP6V0D2		ABITRAM	AGPAT5
ATP6V1B1		ACAA2	AK3
BEX1		ACAD9	ALG14
CLDN4		ACBD6	AMOT
CRELD1		ACTN1	AMT
CRIP1		ACTR8	AP1S1
DNAJC3		ADAP2	APBA3
EID1		ADCK2	APELA
FAM92A		ADCK5	APOE
FDPS		ADSS	ARFGEF1
FLNB		AFG3L2	ATMIN
FTH1		AFTPH	ATOX1
FUOM		AHCY	ATP6AP1
GALK1		AIMP1	AURKAIP1
GDE1		AK4	BABAM2
GJA1		AKR7A2	BAX
GM2A		ALDH3A2	BCL2L14
HSPB3		ALG6	BCL7B
HTATIP2		ALG8	BLOC1S2
IL6		AMDHD2	BOK
KRT18		ANAPC16	C15H9orf116
KRT8		ANAPC2	C16H17orf62
LEP		AP3S2	C2H3orf33
LIM2		APEH	C2H3orf52
LOC100427190		APRT	C7H15orf40
LOC106996902		ARFIP2	CAB39
LOC107000431		ARMC6	CADM1
LOC114671440		ARNT	CAPG
LOC114672188		ARPC1A	CCDC107
LOC114672189		ARPC1B	CCDC115
LOC114672190		ARPC2	CCDC22
LOC114673496		ASNSD1	CCHCR1
LOC114675031		ATG10	CD151
LOC114675366		ATP5F1B	CD53
LOC114678366		ATP5F1D	CDC16
LOC114679684		ATP5MC3	CDC42EP4
LOC693415		ATP5MF	CDKN1A
LOC695989		ATP5PB	CDKN3
LOC697564		ATP6V1A	CEBPZOS
LOC697687		ATXN10	CFAP45
LOC697829		AUH	CGRRF1
LOC699053		BCL2L15	CHD1L
LOC704783		BNIP3	CHDH
LOC707129		BOLA3	CHMP6
LOC707493		BORCS7	CHST5
LOC708874		BRMS1L	CISD3
LOC714576		BROX	CKLF
MT1JP		C3H7orf50	CLUH
MT2A		C7H15orf65	CNR2
MYL7		CA13	COASY
NAXE		CAB39L	COG4
NGEF		CAPZA2	COQ3
NPPB		CASP6	COQ8B
NT5DC1		CCAR2	CORO1B
OLFM2		CCDC58	COX20
PERP		CCN2	CPNE3
PGM1		CCNC	CPSF1
PON2		CCND3	CPVL
PPP1R14A		CCPG1	CTSA
PPP1R14C		CCT4	CTSD
PPP5C		CCT7	CTSK
PRCP		CD300LF	CUEDC2_1
PSMG4		CD300LG	CYB5R4
RHOV		CDC123	DCAF11
SCP2		CDK5RAP2	DCPS
SLC25A10		CFAP410	DHCR24
TAGLN2		CFLAR	DHRS3
TMEM45B		CHCHD1	DPPA4
TMEM54		CHCHD10	DSP
WWP1		CHMP4A	DUS4L
ZFP57		CHORDC1	DUSP6
ZSCAN16		CIAO3	DXO
		CISH	ECPAS
		CKB	EFR3A
		CNDP2	EGLN2_1
		CNPY2	EIF4G3
		COA5	ELF3
		COMT	ELP1
		COPB1	ERBIN
		COX16	ERLEC1
		COX5A	ESRRB
		CPNE1	EXT2
		CPSF7	FASTK
		CSE1L	FBXO10
		CTPS1	FBXO22
		CTSH	FCGR2B
		CTSL	FCGR3
		CTSV	FEZ1
		CUL4A	FGFR2
		CYB5R1	FGFR3
		CYC1	FIBP
		DARS2	FKBP3
		DBF4	FKTN
		DBNL	FLNA
		DDOST	FRA10AC1
		DHRS7B	GALE
		DHX30	GALT
		DIAPH1	GATD3A
		DNAJC3	GDF3
		DNMT3L	GFPT1
		DPH6	GINS1
		DPP4	GLT8D1
		DPPA2	GNMT
		DRG2	GOT1
		DTYMK	GPD2
		DUS3L	GPRC5C
		DUSP11	GPT2
		EED	GRN
		EEF1AKNMT	GSTZ1
		EGFL8	GTF2H4
		EGLN2	GTPBP8
		EIF1AY	GUF1
		EIF2B3	H2AFY
		EIF2S1	HEATR5B
		EIF3B	HECTD1
		EIF3D	HINT3
		EIF3E	HIST3H2A
		ELOVL7	HMGXB3
		EME1	HNF4A
		ENPP4	HPCAL1
		EPCAM	HSD17B11
		ERLIN2	HUWE1
		ERMARD	HYAL2
		EXOSC8	IBTK
		F2RL1	ILVBL
		FADD	IMPACT
		FAH	IMPAD1
		FAM173A	INIP
		FAM3B	IPO9
		FAM50A	ITFG1
		FARSA	JMJD4
		FASTKD2	JMJD7
		FASTKD3	KIR2DL4
		FITM2	KIT
		FKBP5	KLF8
		FMO5	KRTCAP3
		FOLR1	LAMB1
		FOXRED1	LAMC1
		FRRS1	LANCL1
		GALM	LASP1
		GATA6	LIPT2
		GATB	LMAN2L
		GDE1	LOC100423098
		GLB1	LOC100424957
		GLRX2	LOC100430105
		GLUD1	LOC100430397
		GMPPB	LOC106995512
		GNPNAT1	LOC106996192
		GPAA1	LOC106996824
		GSS	LOC106998520
		GSTO1	LOC106998813
		GTF2H2	LOC114669758
		GTF2H5	LOC114670684
		GYG2	LOC114670696
		HADHB	LOC114671166
		HAT1	LOC114671602
		HAVCR1	LOC114672892
		HDDC2	LOC114674257
		HEXA	LOC114675075
		HIKESHI	LOC114675086
		HK1	LOC114675448
		HK2	LOC114677344
		HMBS	LOC114677691
		HSD17B10	LOC114678642
		HSPA9	LOC114678803
		HSPD1	LOC114679145
		IDH3B	LOC114679606
		IFRD2	LOC693272
		IFT43	LOC693438
		IGF2BP1	LOC693699
		ILK	LOC694035
		IMMP2L	LOC694565
		IMPDH2	LOC694734
		INTS11	LOC695670
		INTS13	LOC695732
		INTS6L	LOC696015
		INTS7	LOC696283
		IPO4	LOC696878
		IPO5	LOC697761
		IPO7	LOC698075
		ITGB7	LOC698099
		KCTD6	LOC698715
		LAMP1	LOC699695
		LATS1	LOC701105
		LBR	LOC701866
		LDHA	LOC702581
		LDHB	LOC702932
		LETM1	LOC705400
		LIN9	LOC705596
		LIPH	LOC705840
		LMAN2	LOC706082
		LMNA	LOC706528
		LOC100423423	LOC707117
		LOC100425072	LOC708045
		LOC100425085	LOC708065
		LOC100425407	LOC708140
		LOC100426639	LOC708603
		LOC100427190	LOC710137
		LOC100429260	LOC711183
		LOC100429752	LOC711695
		LOC100430373	LOC712631
		LOC106993989	LOC713028
		LOC106994675	LOC714188
		LOC106994967	LOC714691
		LOC106995218	LOC716589
		LOC106995967	LOC718082
		LOC106996044	LOC718356
		LOC106996165	LOC718596
		LOC106996374	LOC718926
		LOC106996902	LOC720015
		LOC106997221	LOC721192
		LOC106999151	LOC721315
		LOC114669721	LOC723733
		LOC114669729	LPCAT3
		LOC114669843	LPGAT1
		LOC114670433	LY6E_1
		LOC114670689	LYN
		LOC114671351	LYPLA2
		LOC114671716	MAP2K6
		LOC114672050	MAP3K8
		LOC114672190	MARCKS
		LOC114674062	MB21D2
		LOC114674310	MCUR1
		LOC114674454	MDK
		LOC114674455	MIR106B
		LOC114674730	MLST8
		LOC114674955	MOB3B
		LOC114675031	MOGAT2
		LOC114675087	MPDU1
		LOC114675316	MRPL10
		LOC114675333	MSX2
		LOC114675364	MTFMT
		LOC114675372	MTG2
		LOC114675515	MVD
		LOC114675522	MYCBP2
		LOC114675568	MYH9
		LOC114677044	NADK2
		LOC114677128	NAGA
		LOC114677350	NCOA1
		LOC114677470	NDC1
		LOC114678366	NDUFAF2
		LOC114678824	NDUFAF6
		LOC693330	NENF
		LOC693472	NFE2L2
		LOC693802	NIT2
		LOC694628	NME6
		LOC694706	NMRK1
		LOC696144	NMT1
		LOC696151	NUDCD3
		LOC696504	NUDT22
		LOC696854	NUDT3
		LOC696935	OGFOD3
		LOC696959	OSR2
		LOC697564	P4HA2
		LOC697687	PAFAH1B1
		LOC698520	PAGE1
		LOC698530	PARVA
		LOC698792	PCBD1
		LOC698928	PCYOX1
		LOC699195	PCYT2
		LOC699693	PDGFA
		LOC700233	PDP2
		LOC700872	PEMT
		LOC701223	PEX1
		LOC701494	PEX5
		LOC701691	PFKL
		LOC702125	PGAM5
		LOC702606	PINK1
		LOC702654	PKIG
		LOC703127	PLA2G15
		LOC703706	PLBD2
		LOC703919	PLK4
		LOC703968	PMAIP1
		LOC704365	POLR1B
		LOC705465	PPA2
		LOC705546	PPP2R5E
		LOC706177	PRMT9
		LOC707358	PSMB10
		LOC707493	PSMC3IP
		LOC709045	PSORS1C2
		LOC711043	PTGR2
		LOC711309	PTS
		LOC712614	PYCR3
		LOC712661	RAB30
		LOC712840	RAB43
		LOC713313	RAB9A
		LOC713695	RABGGTA
		LOC713714	RAD9A
		LOC713984	RBKS
		LOC714656	RBM45
		LOC715855	RBM47
		LOC717595	RBP4
		LOC717842	RCN2
		LOC718712	RDH10
		LOC720019	REEP5
		LOC720244	REPS1
		LOC722074	RETSAT
		LOXL2	RHEX
		LPAR2	RHOT2
		LRIF1	RIN2
		LRPAP1	RNF130
		LRPPRC	RNF40
		LRRC14	RO60
		LSM5	RPAP3
		LYPLA1	RTN4IP1
		M6PR	SASH1
		MAGEH1	SATB2
		MAPRE1	SDHD_1
		MCEE	SFXN1
		MDH2	SH3RF1
		MECR	SHKBP1
		MED17	SKIV2L
		MED22	SLC25A29
		MED24	SLC27A5
		MFSD8	SLC29A1
		MGAT2	SLC37A4
		MIF	SLC38A7
		MKI67	SLC39A7
		MKKS	SLC4A11
		MRM1	SMARCAL1
		MRPL1	SMC6
		MRPL23	SMIM1
		MRPL27	SMIM3
		MRPL28	SMPDL3A
		MRPL32	SNX24
		MRPL33	SPOUT1
		MRPL38	SPTAN1
		MRPL45	SPTBN1
		MRPL47	SPTSSA
		MRPL9	SRD5A3
		MRPS15	SRR
		MRPS17	STAP2
		MRPS25	STAU2
		MRPS27	SUSD2
		MRPS30	SWSAP1
		MRPS34	TADA3
		MRPS5	TANGO2
		MRRF	TEDC1
		MTCH2	TEDC2
		MTFP1	TET1
		MTG1	TEX261
		MTHFD1	TEX50
		MTX2	THEM6
		MYDGF	THOP1
		MZT1	TIGD3
		N6AMT1	TJP2
		NAA10	TM9SF1
		NAA25	TM9SF3
		NAE1	TMBIM4
		NANOG	TMED1
		NBN	TMED4
		NDUFA12	TMEM150C
		NDUFA9	TMEM161B
		NDUFB3	TMEM203
		NDUFB4	TMEM35A
		NDUFB7	TMEM43
		NDUFC2	TMX4
		NDUFS6	TNS3
		NDUFS8	TPM4
		NDUFV1	TRAF2
		NIPSNAP2	TRAPPC6A
		NIT1	TRIB1
		NLRP7	TRIM5
		NMI	TRNAA-AGC_8
		NOC4L	TRNAC-GCA_17
		NOTO	TRNAC-GCA_7
		NPC2	TRNAR-ACG_5
		NUDT1	TSR3
		NUDT16L1	TTC12
		NUDT4	TTLL12
		NUDT5	TYRO3
		NUDT9	UBASH3B
		NUP107	UBE3A
		OAT	UBL4A
		OLA1	UBXN4
		OSGEP	UFSP2
		OSTC	UNC45A
		OXSM	UPP1
		PAGE2B	USP38
		PCBD2	USP5
		PCED1B	VARS
		PCLAF	VCL
		PDCD2L	VPS33A
		PDHB	VPS36
		PDS5B	VPS51
		PEPD	WDR13
		PET117	XYLT2
		PFAS	YBEY
		PGK1	YDJC
		PIGO	ZDHHC12
		PIGV	ZDHHC24
		PMPCA	ZDHHC9
		PMPCB	ZNF511
		PNPT1	ZNF8
		POLE2	AK2
		POLR2I	AKAP12
		POLRMT	ATP5PO
		POMK	ATP6V0B
		POU5F1	ATP6V0E1
		PPIL1	CALR
		PPP1CA	CHID1
		PPP1R14A	DLAT
		PPP2CB	DUSP1
		PPP2R5A	ECHS1
		PPP5C	EEF1B2
		PPT1	EEF1G
		PRKDC	ETFB
		PRMT3	FABP5
		PRXL2A	FXN
		PSMA1	GCSH
		PSMB7	GNPDA1
		PSMC1	GPS1
		PSMD14	HAX1
		PSME4	HSPA14
		PTCD2	HSPE1
		QRSL1	IDH3A
		RAB3IP	LOC106995978
		RANBP1	LOC114675599
		RBBP9	LOC721815
		RBM44	MYL12A
		RDH11	MYL6
		REXO4	NDUFA4
		RNASE9	NDUFB5
		RNF121	NDUFB8
		RNF26	NLRP2
		RNF5	PAAF1
		RPL22L1	PHPT1
		RPL26L1	PPCS
		RPL4	PSMA4
		RPN2	PSMB5
		RPP25L	RPL5
		RPS4Y1	SERINC3
		RPS4Y2	SFXN4
		RPSA	SH3BGRL2
		RPUSD1	SHISA5
		RREB1	SLC39A4
		RUVBL1	SNX2
		RXYLT1	SOAT1
		SAAL1	TIMM8B_1
		SAP25	TMBIM1
		SCPEP1	TMED9
		SCYL3	TMEM14C
		SDHAF2	TMEM219
		SDHD	VDAC3
		SEC11C	COMMD10
		SELENOT	HRAS
		SEPHS1	LOC722212
		SGTB
		SHLD2
		SHMT1
		SLC18B1
		SLC23A2
		SLC25A3
		SLC27A4
		SLC30A5
		SLC35B1
		SLC35B2
		SLC35B3
		SLC39A1
		SLC41A2
		SLC52A2
		SLC6A8
		SLC7A2
		SLCO4C1
		SLIRP
		SLTM
		SMARCAD1
		SMCO4
		SMIM20
		SNX17
		SNX18
		SOX2
		SPCS1
		SPG21
		SPIC
		SPTLC2
		SRM
		SSBP1
		ST3GAL6
		STOM
		STUB1
		SUMO3
		SUZ12
		TACO1
		TARBP2
		TARS2
		TATDN1
		TBL3
		TCEAL8
		TEAD4
		TFAM
		TFB1M
		TFCP2
		TIMM17A
		TIMM17B
		TIMM8B
		TIMMDC1
		TMED3
		TMEM126A
		TMEM14B
		TMEM165
		TMEM19
		TMEM37
		TMEM45A
		TMEM54
		TMTC3
		TOE1
		TOP1MT
		TOR1AIP1
		TPR
		TPST2
		TRAPPC2L
		TRIM27
		TRIM32
		TRIML2
		TRMT61A
		TSEN54
		TSPAN14
		TSTA3
		TTC19
		TUBB
		TUBB4A
		TUT1
		UBAC1
		UBE3C
		UBQLN4
		UQCR
		URGCP
		URI1
		UTP15
		VDAC2
		VPS28
		VPS39
		WDR12
		WDR18
		WDR36
		WDR4
		WDR54
		WDR6
		WDR73
		WDR77
		WWTR1
		XAGE5
		XPNPEP1
		XPNPEP3
		XPOT
		YARS
		YIF1A
		YIPF3
		ZFAND1
		ZFAND2B
		ZFYVE27
		ZGPAT
		ZMPSTE24
		ZMYM1
		ZMYND8
		ZNF140
		ZNF232
		ZNF326
		ZNF623
		ZNF7
		ZPR1
