# Supplementary material
Source: Research Square preprint supplement (doi:10.21203/rs.3.rs-7771199/v1)
Supplement: Supplementary file 4 [file 3fb94a529babf5483ec60557.xlsx]

## Sheet: Sheet1
Gene list used for senescence scoring in monkey oocytes		The senescence score for GV					The senescence score for MII
Gene symbol		Sample	Ages(years)	Groups	Score		Sample	Ages(years)	Groups	Score
MAPK12		Ygv10	6-10	Young	0.0439717		MII_11	6-10	Young	0.061265
CALM3		Ygv12	6-10	Young	0.0520756		MII12	6-10	Young	0.0528789
PPP1CC		Ygv13	6-10	Young	0.0190239		oMII18	12-15	Young	0.0516996
HUS1		Ygv14	6-10	Young	0.0321216		oMII6	12-15	Young	0.0664813
CDK4		Ygv15	6-10	Young	0.0315371		YMII_2	6-10	Young	0.0614259
CDK1		Ygv16	6-10	Young	0.0210067		YMII10	6-10	Young	0.0481194
RRAS2		Ygv17b	6-10	Young	0.0221209		YMII11	6-10	Young	0.0146327
BTRC		Ygv18b	6-10	Young	0.0330205		YMII12	6-10	Young	0.0196247
IGFBP3		Ygv19	6-10	Young	0.000756105		YMII13	6-10	Young	0.0614532
MTOR		Ygv20	6-10	Young	0.00581411		YMII14	6-10	Young	0.0753103
CALML3		Ygv21	6-10	Young	0.00560445		YMII15	6-10	Young	0.0497872
CCNA1		Ygv22.1	6-10	Young	0.0112312		YMII16	6-10	Young	0.0554816
CHEK1		Ygv3	6-10	Young	0.0728162		YMII17	6-10	Young	0.0437606
SERPINE1		Ygv5	6-10	Young	0.0665397		YMII18	6-10	Young	0.0459608
NBN		Ygv8	6-10	Young	0.0408212		YMII19	6-10	Young	0.0535206
LIN37		ogv21	17-21	Middle	0.0598085		YMII20	6-10	Young	0.0506003
KIR2DL4		ogv23	17-21	Middle	0.0907447		YMII21	6-10	Young	0.0455539
MCU		ogv24	17-21	Middle	0.0509028		YMII22	6-10	Young	0.0606218
HLA-F		ogv25	17-21	Middle	0.0350449		MII_8	12-15	Middle	0.0667501
NFATC3		ogv26	17-21	Middle	0.0314978		MII10	12-15	Middle	0.0749107
CACNA1D		ogv26b	17-21	Middle	0.0655431		MII7	12-15	Middle	0.0691289
RBL2		ogv27	17-21	Middle	0.03307		ooMII_2	12-15	Middle	0.0914247
VDAC3		ogv27.1	17-21	Middle	0.0664808		YMII3	12-15	Middle	0.0868644
VDAC1		ogv28b	17-21	Middle	0.0465777		YMII4	6-10	Middle	0.0633255
MAPK14		ogv29	17-21	Middle	0.0821978		YMII5	6-10	Middle	0.073062
TGFB2		oogv10	17-21	Middle	0.0703229		MII13	17-21	Old	0.0911456
TRAF3IP2		oogv21	17-21	Middle	0.0771282		MII9	17-21	Old	0.0885281
HRAS		Ygv22	12-15	Middle	0.0573522		oMII_4	17-21	Old	0.0617042
HLA-C		Ygv23	12-15	Middle	0.0378287		oMII10	17-21	Old	0.0894789
TP53		Ygv24	12-15	Middle	0.0478232		oMII11	17-21	Old	0.076607
PTEN		Ygv25	12-15	Middle	0.0594243		oMII12	17-21	Old	0.1012
CDK6		Ygv26	12-15	Middle	0.0598223		oMII13	17-21	Old	0.0891558
E2F5		Ygv27	12-15	Middle	0.0615193		oMII14	17-21	Old	0.0951255
PIK3CB		Ygv28b	12-15	Middle	0.0371219		oMII15	17-21	Old	0.0525738
FOXO3		Ygv29b	12-15	Middle	0.0250136		oMII16	17-21	Old	0.0717912
RHEB		Ygv31b	12-15	Middle	0.0900242		oMII17	17-21	Old	0.0569875
HIPK3		Ygv32	12-15	Middle	0.0575631		oMII21	17-21	Old	0.0948232
CALML5		Ygv33b	12-15	Middle	0.0824959		oMII22	17-21	Old	0.0817296
TRPM7		ogv1	17-21	Old	0.0767488		oMII23	17-21	Old	0.0886941
CDKN2B		ogv17	17-21	Old	0.0574899		oMII3	17-21	Old	0.0995477
RAD1		ogv18	17-21	Old	0.0620358		oMII4	17-21	Old	0.0889588
TGFBR2		ogv19	17-21	Old	0.0618438		ooMII1	17-21	Old	0.0846021
SLC25A31		ogv2	17-21	Old	0.0643302		YMII30	12-15	Old	0.0985335
RAF1		ogv20	17-21	Old	0.0833297		YMII31	12-15	Old	0.0972368
MRE11		ogv28	17-21	Old	0.0684103
CCNB1		ogv3	17-21	Old	0.0763033
TRPV4		ogv30	17-21	Old	0.069657
PIK3CD		oogv1	17-21	Old	0.0844224
CDKN2A		oogv11	17-21	Old	0.0684005
RAD9A		oogv12	17-21	Old	0.0536266
TGFB1		oogv13	17-21	Old	0.064935
SMAD2		oogv14	17-21	Old	0.0472088
GADD45G		oogv15	17-21	Old	0.0739108
IL1A		oogv16	17-21	Old	0.0745756
ITPR2		oogv17	17-21	Old	0.0486322
MRAS		oogv18	17-21	Old	0.0664057
MYC		oogv19	17-21	Old	0.0675683
ATR		oogv2	17-21	Old	0.0735416
CDKN1A		oogv22	17-21	Old	0.0812888
CAPN1		oogv3	17-21	Old	0.0893958
PIK3R2		oogv5	17-21	Old	0.0624632
E2F1		oogv6	17-21	Old	0.100766
MAPK3		oogv7	17-21	Old	0.0752027
MAP2K2		oogv8	17-21	Old	0.0790843
HLA-B		Ygv1	17-21	Old	0.0483206
CCNA2		Ygv11	17-21	Old	0.0457033
CCNE2		Ygv2	17-21	Old	0.0566603
PPP3CB		Ygv4	17-21	Old	0.0527055
TSC2		Ygv6b	17-21	Old	0.0542213
CALM1		Ygv7	12-15	Old	0.0479759
RASSF5		Ygv9	12-15	Old	0.0403698
MAPKAPK2		Yogv1	12-15	Old	0.0537898
HLA-G		Yogv2	12-15	Old	0.0504712
PPP1CB		Yogv3	12-15	Old	0.0816139
MAP2K3
LIN52
RBBP4
SLC25A6
HLA-A
ETS1
TGFB3
RAD50
E2F3
KRAS
HIPK2
MAPK13
CCND2
CALM2
AKT1
EIF4EBP1
NFATC4
PIK3R1
CCNB3
CALML6
LIN54
AKT3
MAPK1
CHEK2
FOXO1
GADD45A
RELA
TSC1
SQSTM1
HIPK4
NFATC1
CCND3
HIPK1
MYBL2
RAD9B
SMAD3
IL6
PPP3R1
ITPR1
CALML4
PPP3CA
RB1
MDM2
NRAS
RBL1
CXCL8
GATA4
VDAC2
NFATC2
AKT2
MAP2K1
NFKB1
SIRT1
PPID
PPP3R2
SLC25A4
TGFBR1
LIN9
CDK2
FBXW11
CCNE1
ZFP36L2
GADD45B
CCND1
FOXM1
ZFP36L1
CAPN2
PIK3CA
PPP3CC
PPP1CA
ITPR3
CCNB2
PIK3R3
HLA-E
E2F4
RRAS
SLC25A5
ATM
E2F2
CDC25A
MAPK11
MAP2K6
