# Supplementary material
Source: Research Square preprint supplement (doi:10.21203/rs.3.rs-7771199/v1)
Supplement: Supplementary file 5 [file 5dc9e666c686762407329a22.xlsx]

## Sheet: GO enrichment of C1
GO enrichment of C1 genes
Category	Term	Count	%	PValue	Genes
GOTERM_BP_DIRECT	GO:0046627~negative regulation of insulin receptor signaling pathway	3	5	0.00353047	SOCS3, SOCS1, PIP4K2C
GOTERM_BP_DIRECT	GO:0046854~phosphatidylinositol phosphate biosynthetic process	3	5	0.00383828	SOCS3, SOCS1, PIP4K2C
GOTERM_BP_DIRECT	GO:0001932~regulation of protein phosphorylation	3	5	0.00937139	SOCS3, SOCS1, HSPB1
GOTERM_BP_DIRECT	GO:0035556~intracellular signal transduction	5	8.33333	0.00964903	SOCS3, SOCS1, LCK, MKNK2, HSPB1
GOTERM_BP_DIRECT	GO:0009615~response to virus	3	5	0.0161073	IFITM1, 2410002F23RIK, HSPB1
GOTERM_BP_DIRECT	GO:0050731~positive regulation of peptidyl-tyrosine phosphorylation	3	5	0.0189134	CD74, GATA1, HBEGF
GOTERM_BP_DIRECT	GO:0071243~cellular response to arsenic-containing substance	2	3.33333	0.0189823	GSTO1, MKNK2
GOTERM_BP_DIRECT	GO:0000079~regulation of cyclin-dependent protein serine/threonine kinase activity	2	3.33333	0.020861	CDKN1A, SFN
GOTERM_BP_DIRECT	GO:0042532~negative regulation of tyrosine phosphorylation of STAT protein	2	3.33333	0.0246077	SOCS3, SOCS1
GOTERM_BP_DIRECT	GO:0046598~positive regulation of viral entry into host cell	2	3.33333	0.0264758	CD74, LGALS1
GOTERM_BP_DIRECT	GO:0046426~negative regulation of receptor signaling pathway via JAK-STAT	2	3.33333	0.0376106	SOCS3, SOCS1
GOTERM_BP_DIRECT	GO:0010737~protein kinase A signaling	2	3.33333	0.0394542	GAL, SFN
GOTERM_BP_DIRECT	GO:0008285~negative regulation of cell population proliferation	4	6.66667	0.0408122	IFITM1, CDKN1A, GAL, GATA1

## Sheet: GO enrichment of C2
GO enrichment of C2 genes
Category	Term	Count	%	PValue	Genes
GOTERM_BP_DIRECT	GO:0015031~protein transport	5	10	0.00720433	GABARAPL2, RAB24, IER3IP1, TOMM5, BET1L
GOTERM_BP_DIRECT	GO:0009611~response to wounding	3	6	0.0173882	2310040G24RIK, GPX1, DANCR
GOTERM_BP_DIRECT	GO:0061136~regulation of proteasomal protein catabolic process	2	4	0.0348842	EPM2A, GPX1
GOTERM_BP_DIRECT	GO:0006914~autophagy	3	6	0.038077	EPM2A, GABARAPL2, RAB24
GOTERM_BP_DIRECT	GO:0045445~myoblast differentiation	2	4	0.0395478	LGALS1, GPX1

## Sheet: GO enrichment of C3
GO enrichment of C3 genes
Category	Term	Count	%	PValue	Genes
GOTERM_BP_DIRECT	GO:0006357~regulation of transcription by RNA polymerase II	28	18.4211	1.34083e-08	DIDO1, KDM3A, ZFP869, DHX9, ZFP868, ZSCAN4D, ZSCAN4C, ZBTB43, ZSCAN4F, ZFP948, RLF, IKZF5, YY2, NACC1, DPF2, ZFP386, KLF13, ZFP1, USP22, ZFP954, MAPK14, TBX3, DUSP6, TOX4, TEF, SP1, ZFP42, SP6
GOTERM_BP_DIRECT	GO:0010833~telomere maintenance via telomere lengthening	3	1.97368	0.000795402	ZSCAN4D, ZSCAN4C, ZSCAN4F
GOTERM_BP_DIRECT	GO:0006338~chromatin remodeling	13	8.55263	0.0012635	POLQ, KDM3A, DHX9, USP22, MORC2A, TTF1, HIPK1, DUSP6, HIPK3, LCK, DPF2, PTPN9, PIM2
GOTERM_BP_DIRECT	GO:0006915~apoptotic process	9	5.92105	0.00616457	STIL, DPF2, MFN2, PIM2, MAPK14, ELP6, CTSC, HIPK3, RBM5
GOTERM_BP_DIRECT	GO:0042254~ribosome biogenesis	3	1.97368	0.0238274	GNL3L, TSR1, GLUL
GOTERM_BP_DIRECT	GO:1903428~positive regulation of reactive oxygen species biosynthetic process	3	1.97368	0.00366187	MFN2, ALOX12, SLC5A3
GOTERM_BP_DIRECT	GO:0006366~transcription by RNA polymerase II	6	3.94737	0.00608872	MED24, KLF13, POLR1B, SP6, MAPK14, GATA1
GOTERM_BP_DIRECT	GO:0048511~rhythmic process	4	2.63158	0.00667471	PRKCG, TEF, PSPC1, SP1
GOTERM_BP_DIRECT	GO:0019676~ammonia assimilation cycle	2	1.31579	0.00951562	ASL, GLUL
GOTERM_BP_DIRECT	GO:0008285~negative regulation of cell population proliferation	7	4.60526	0.0123055	GAL, RGCC, KLF13, GGNBP2, MFN2, PIM2, GATA1
GOTERM_BP_DIRECT	GO:0045944~positive regulation of transcription by RNA polymerase II	13	8.55263	0.0199302	KDM3A, KLF13, DHX9, MAPK14, GATA1, TBX3, RGCC, YY2, GAL, TEF, SP1, ZFP42, DPF2
GOTERM_BP_DIRECT	GO:0000122~negative regulation of transcription by RNA polymerase II	11	7.23684	0.0238597	HEXIM1, HMBOX1, ZFP217, BEND3, YLPM1, HIPK1, GATA1, TBX3, HIPK3, ZFP386, IKZF5
GOTERM_BP_DIRECT	GO:0001701~in utero embryonic development	6	3.94737	0.0276726	SLC34A2, STIL, SP1, ZFP42, GATA1, TBX3
GOTERM_BP_DIRECT	GO:0031397~negative regulation of protein ubiquitination	3	1.97368	0.0344105	PRKCG, GNL3L, BAG5
GOTERM_BP_DIRECT	GO:0045893~positive regulation of DNA-templated transcription	9	5.92105	0.0344232	KDM3A, HMBOX1, MED24, SP1, USP22, RNF6, PIM2, GATA1, TBX3
GOTERM_BP_DIRECT	GO:0034224~cellular response to zinc ion starvation	2	1.31579	0.0375263	SP1, SLC39A4
GOTERM_BP_DIRECT	GO:0000381~regulation of alternative mRNA splicing, via spliceosome	3	1.97368	0.0397197	FXR2, MALAT1, RBM5
GOTERM_BP_DIRECT	GO:0032741~positive regulation of interleukin-18 production	2	1.31579	0.0421177	DHX9, USP50
GOTERM_BP_DIRECT	GO:0006355~regulation of DNA-templated transcription	10	6.57895	0.0424661	SBNO1, ZFP1, PSPC1, SP1, ZFP217, EU599041, RNF6, ZFP936, MAPK14, ZFP280C
GOTERM_BP_DIRECT	GO:0001525~angiogenesis	5	3.28947	0.0489802	MMP19, MAPK14, HS6ST1, SAT1, GLUL

## Sheet: GO enrichment of C4
GO enrichment of C4 genes
Category	Term	Count	%	PValue	Genes
GOTERM_BP_DIRECT	GO:0006357~regulation of transcription by RNA polymerase II	99	10.9272	7.38464e-12	DUXBL1, ZFP566, FOXI3, ARID4B, BACH1, YY1, SPIC, MYC, RUVBL1, PKNOX1, DDX17, ABT1, SMARCC1, ARID5A, ZFP617, WDR77, OVOL2, CTDNEP1, HIC2, LMX1A, ZFP7, FKBP4, ZFP623, ZBTB8A, CBFB, MAGED1, SP140, CREM, GATA4, ZBTB5, DEAF1, ZFP54, HESX1, ZBTB17, ZFP599, DR1, ZFP637, ZFP239, NFATC3, SMAD7, YEATS2, SP2, ID2, JMY, SP3, CREBRF, SNAI1, TAF4B, PIN1, MAFK, ZFP352, CSRNP1, ZFP644, ZFP367, GM14326, ZFP647, H…
GOTERM_BP_DIRECT	GO:0045944~positive regulation of transcription by RNA polymerase II	69	7.61589	1.38458e-06	ARF4, CSRNP1, RARG, GM13034, CITED1, HEXB, ARID4B, FGF1, BACH1, YY1, SPIC, SPZ1, MYC, ZC3H12A, KPNA6, PKNOX1, GABPA, GTF2I, DDX17, RBM14, SMARCC1, PUS1, ARID5A, ABHD14B, SAFB, PPRC1, ZFX, ETV5, OVOL2, NR5A2, LMX1A, D1PAS1, NUFIP1, CBFB, HDAC1, CREM, DDX21, GATA4, NR2C2, NPAT, SERTAD1, EPCAM, DEAF1, ZFP263, RPRD1B, HES1, MTA2, WWTR1, ZBTB17, AKIRIN1, KDM4C, CHURC1, PCGF5, MGA, EAF1, NFATC3, CDC5L,…
GOTERM_BP_DIRECT	GO:0001825~blastocyst formation	10	1.10375	8.31794e-08	RRP7A, KDM4C, USPL1, PRAMEL7, PNLDC1, NOP2, WDR74, GABPA, CCNB1IP1, BYSL
GOTERM_BP_DIRECT	GO:0000122~negative regulation of transcription by RNA polymerase II	53	5.84989	6.18335e-05	RARG, ARID4B, BACH1, YY1, MYC, GABPA, PRMT6, PRMT5, ZGPAT, ARID5A, PARP9, KLF16, ETV5, OVOL2, EID2, CCNE1, TRIB3, AJUBA, CGGBP1, KHDRBS1, ZBTB8A, CBFB, MAGED1, HDAC1, DDX20, CREM, GATA4, NR2C2, ZBTB5, DEAF1, ZFP263, HESX1, HES1, VHL, MTA2, RBM10, WDTC1, WWTR1, DR1, ZFP239, KLF4, HINFP, SMAD7, KLF5, YEATS2, SP2, ID2, CDK2, ID1, SP3, SNAI1, CREBRF, MAFK
GOTERM_BP_DIRECT	GO:0045893~positive regulation of DNA-templated transcription	46	5.07726	1.27818e-05	INO80C, CITED1, MAGED1, HDAC1, GATA4, BCL10, FGF1, YY1, ING4, NPAT, SERTAD1, DEAF1, CHEK2, MYC, TMSB4X, RUVBL1, TASP1, HES1, MTA2, PKNOX1, MAP2K7, MAP2K3, CD74, ZBTB17, SMARCC1, CHURC1, MGA, NFATC3, KLF4, PARP9, GRHL2, USF1, ETV5, WDR77, HINFP, PPM1A, KLF5, NR5A2, ARL2BP, ID2, SP3, JMY, CDK2, SNAI1, NUPR1, RBMX
GOTERM_BP_DIRECT	GO:0045087~innate immune response	35	3.86313	9.71235e-06	DDX21, HMGB3, BCL10, IFI35, IPO7, ZFP809, LGALS3, SEC14L1, RFPL4B, G3BP1, TNFAIP8L2, PGLYRP1, UBL7, TRIM43A, RAB2B, RBM14, TRIM43C, ARG1, ATG9A, ARID5A, TRAF2, CNPY3, PARP9, USP29, BSPRY, ISG20, CD24A, POLR3C, POLR3D, POLR3E, POLR3G, POLR3H, GAPDH, D1PAS1, MSRB1
GOTERM_BP_DIRECT	GO:0043066~negative regulation of apoptotic process	34	3.75276	0.00162044	PRR5, GM13057, ARF4, PDXK, GM16367, DYRK3, TFRC, HDAC1, SLC2A3, GATA4, RNF7, CBL, CLU, LGALS3, PRAMEL7, EPCAM, CASP3, PRAMEL6, PRAMEL5, PIM3, PAK2, MCL1, CD74, TSLP, EIF2AK3, PRAMEL4, TRAF2, GM13043, ID1, SPRY2, NUPR1, SGK1, D1PAS1, STK40
GOTERM_BP_DIRECT	GO:0045892~negative regulation of DNA-templated transcription	33	3.64238	0.00695613	GM13057, KDM5B, GM16367, CITED1, MAGED1, HDAC1, DDX20, CREM, PWP1, ING4, NPAT, PRAMEL7, DEAF1, PRAMEL6, PRAMEL5, HESX1, HES1, MTA2, PRMT6, ZGPAT, PRAMEL4, DDX54, KLF4, GM13043, COMMD7, HINFP, EID2, MYBBP1A, ID2, SP3, ID1, SNAI1, TRIB3
GOTERM_BP_DIRECT	GO:0008284~positive regulation of cell population proliferation	31	3.42163	0.00442047	GM13057, RARG, GM16367, HDAC1, NOP2, FGF1, CLU, LGALS3, PRAMEL7, EPCAM, MYC, PRAMEL6, PRAMEL5, RPRD1B, HES1, WWTR1, NMB, SMARCC1, KDM4C, TSLP, PRAMEL4, GM13043, WDR77, ACER2, KLF5, SAPCD2, CDK4, ID2, CDK2, LTA, AQP11
GOTERM_BP_DIRECT	GO:0006364~rRNA processing	28	3.09051	1.09401e-15	NOP2, DDX21, AK6, PWP1, RRP9, RRP7A, FBL, MYG1, PDCD11, RRP12, EXOSC2, UTP14B, DDX17, DIS3, WDR18, RPP40, WDR74, DDX54, WDR55, BYSL, ISG20, BOP1, TBL3, RPS27, GEMIN4, TSR2, ESF1, RPP25
GOTERM_BP_DIRECT	GO:0007283~spermatogenesis	28	3.09051	0.00207921	KHDRBS1, RPL10L, CREM, SPATA2, ARID4B, GATA4, NR2C2, YY1, GJA1, PRDX4, BCL2L11, CTSL, PGM3, UTP14B, SPINK2, CRTAP, BTBD18, PGAM2, PUM1, CDC25C, ZFX, ACOX1, PNLDC1, SLCO4C1, TAF4B, MNS1, TRIP13, D1PAS1
GOTERM_BP_DIRECT	GO:0006915~apoptotic process	28	3.09051	0.00961849	CSRNP1, RARG, USP17LE, CITED1, 1600012H06RIK, BCL10, DEDD2, TCHP, ING4, EVA1A, CASP6, CASP3, ZC3H12A, PIM3, MAP2K7, PGLYRP1, PAK2, BCL2L14, RBM14, SPINK2, PRKCD, AXIN1, TRAF2, SLTM, ID1, G2E3, SGK1, GAPDH
GOTERM_BP_DIRECT	GO:0006397~mRNA processing	25	2.75938	1.38924e-07	TRUB2, KHDRBS1, DBR1, CWC25, PHRF1, TSEN2, TSEN54, SYNCRIP, LGALS3, MYG1, PABPN1, PPP1R8, RBBP6, PAPOLB, SNRNP35, PPIL1, CPSF6, PUS1, NUDT21, RPUSD3, PABPC1, RBMX, TRMT61A, SNRPA, SUGP1
GOTERM_BP_DIRECT	GO:0006338~chromatin remodeling	56	6.18102	1.89553e-07	USP36, KDM5B, DYRK3, STK19, CHD1, YY1, ING4, FBL, NTMT1, CHEK2, MYC, RUVBL1, PIM3, MDP1, MAP2K3, PRMT6, DDX17, PRMT5, SMARCC1, PRKCD, DDX54, CDC25C, PTP4A1, CTDNEP1, METTL22, PPM1A, ULK1, SGK1, D1PAS1, STK40, INO80C, GTF3C4, CTDP1, HDAC1, DDX20, DDX21, PDXP, AK6, PPM1G, ATXN3, PPP2CB, CHRAC1, DHX33, G3BP1, MTA2, MAP2K7, PAK2, PTPN1, KDM4C, CHKA, EIF2AK3, TOR1B, MYBBP1A, YEATS2, CDK2, ALPL
GOTERM_BP_DIRECT	GO:0042981~regulation of apoptotic process	24	2.64901	1.82241e-07	USP36, KHDRBS1, USP17LD, USP17LE, CITED1, GLS2, TRAF2, BCL10, CLU, DEDD2, ACER2, GJA1, BCL2L11, CASP6, MYC, AKT1S1, RUVBL1, ANP32E, TNFAIP8L2, BID, USP17LC, BCL2L14, KPNA1, MCL1
GOTERM_BP_DIRECT	GO:1990830~cellular response to leukemia inhibitory factor	24	2.64901	4.70471e-05	KDM5B, RARG, PMM1, TFRC, GLDC, SHMT1, MGA, CACYBP, KLF4, SDAD1, SMAD7, BSPRY, CHCHD4, SYNGR1, MIR465B-2, KLF5, MIR465C-2, RNF125, NR5A2, MAT2A, MIR592, MKRN1, UBTF, SPRY2
GOTERM_BP_DIRECT	GO:0043161~proteasome-mediated ubiquitin-dependent protein catabolic process	24	2.64901	0.000178813	FAF2, KLHL10, KLHL21, AXIN1, KLHL11, FBXO45, RNF7, SPSB3, RMND5B, SOCS2, TDPOZ5, PPP2CB, ATXN3, PSMD7, TDPOZ4, PRAMEL7, PRAMEL6, PRAMEL5, ARIH2, UBXN7, FEM1C, VHL, TDPOZ1, TDPOZ2
GOTERM_BP_DIRECT	GO:0043065~positive regulation of apoptotic process	24	2.64901	0.00154109	EIF2B5, ZFP622, ZFP346, MTCH2, RARG, SPINK2, TNFRSF12A, PRKCD, CTRB1, DKKL1, NFATC3, DDX20, BCL10, CLU, ING4, BCL2L11, CASP6, CDK4, CASP3, JMY, LTA, BID, D1PAS1, MCL1
GOTERM_BP_DIRECT	GO:0010468~regulation of gene expression	24	2.64901	0.0078255	TRIM43A, PRMT5, RARG, TRIM43C, KDM4C, ATXN7L3B, GATA4, AFF4, GRHL2, PPP2CB, UBTFL1, KLF5, LMX1A, CDK4, MYC, ALKBH1, ID2, ZC3H12A, CDK2, PIN1, ULK1, VHL, STK40, CGGBP1
GOTERM_BP_DIRECT	GO:0015031~protein transport	24	2.64901	0.012554	RTN2, PLEKHF2, CD63, ARF4, RAB2B, VPS37B, SDAD1, GABARAP, RAB33B, ARFGAP2, SEC61A2, RABGEF1, NECAP2, LSG1, RAB20, NECAP1, DUOXA2, AP1S1, AP4S1, VHL, RAB39, RAB5A, SEC23B, TMED4
GOTERM_BP_DIRECT	GO:0001701~in utero embryonic development	22	2.42826	0.00171997	DNAAF2, SSR2, PITPNB, AXIN1, GATA4, HBA-A1, GRHL2, BYSL, HINFP, NPAT, GJA1, BCL2L11, SP2, SCO2, ALKBH1, SP3, CDK2AP1, HES1, RBBP6, SLC39A1, GABPA, WDTC1
GOTERM_BP_DIRECT	GO:0035556~intracellular signal transduction	21	2.31788	0.0299366	LRRC58, MAP3K3, DGKE, WSB1, TFRC, GM10662, TUFT1, PRKCD, SMAD7, LAT2, SOCS2, PPP1R2, RAB40C, GM4567, GM6902, CASP3, SGK1, PAK2, D1PAS1, PLCD4, THOP1
GOTERM_BP_DIRECT	GO:0008285~negative regulation of cell population proliferation	20	2.20751	0.0244175	CDKN2D, PTPN1, ZBTB17, IFITM1, TES, DDX20, IFI35, KLF4, ATG13, WDR77, OVOL2, ING4, SULT2B1, GJA1, FTH1, SPRY2, PEMT, ULK1, NUPR1, RBM10
GOTERM_BP_DIRECT	GO:0010629~negative regulation of gene expression	20	2.20751	0.0252971	HDAC1, EIF2AK3, AXIN1, GATA4, KLF4, PARP9, MIR338, OVOL2, HINFP, YY1, PPP2CB, GJA1, MYC, ID2, ZC3H12A, ID1, HES1, VHL, SRSF6, D1PAS1
GOTERM_BP_DIRECT	GO:0006886~intracellular protein transport	19	2.09713	0.00058654	ARF4, CD74, IPO11, SEC24A, AP4B1, TOMM20, AP2A2, IPO7, IPO4, RAB43, RAB20, CTTN, RAB19, AP1S1, AP4S1, RAB5A, SEC23B, TMED6, TMED4
GOTERM_BP_DIRECT	GO:0006974~DNA damage response	19	2.09713	0.0104321	TIGAR, PRKCD, WDR4, FBXO45, CBL, YY1, ACER2, CHEK2, MYC, CASP3, ZC3H12A, CDK2, NABP2, NABP1, RBBP6, SGK1, IER3, RAD9A, MCL1
GOTERM_BP_DIRECT	GO:0030163~protein catabolic process	14	1.54525	0.000184867	CTRB1, AXIN1, TRAF2, CPN1, TDPOZ5, TDPOZ4, CTSL, CHEK2, CASP3, LAMP2, VHL, TDPOZ1, TDPOZ2, CTSB
GOTERM_BP_DIRECT	GO:0000398~mRNA splicing, via spliceosome	17	1.87638	5.87905e-05	PPIL1, RBM14, DBR1, NCBP1, GPKOW, CDC5L, CWC25, CASC3, PRPF4, LSM8, RBMX2, SNIP1, SNRNP35, SNRPC, SNRPA, RBM10, SNRPB
GOTERM_BP_DIRECT	GO:0051726~regulation of cell cycle	16	1.766	0.00598043	INO80C, KHDRBS1, DR1, PUM1, PPM1G, OVOL2, YY1, CDK9, ING4, BOP1, YEATS2, CDK4, CCNE1, CDK2, RUVBL1, PRR11
GOTERM_BP_DIRECT	GO:0051607~defense response to virus	16	1.766	0.00665785	DDX17, RAB2B, IFITM1, CXADR, NCBP1, H2-Q9, DDX21, PARP9, USP29, ISG20, POLR3C, POLR3D, G3BP1, POLR3E, POLR3G, POLR3H
GOTERM_BP_DIRECT	GO:0006366~transcription by RNA polymerase II	15	1.65563	0.0111425	DR1, NFATC3, DDX21, ARID4B, KLF4, PHRF1, GTF2H4, CDK9, SNAPC2, MYC, KPNA6, TAF4B, POLR2H, RBMX, GTF2I
GOTERM_BP_DIRECT	GO:0006281~DNA repair	18	1.98675	0.00474222	INO80C, PRMT6, CDC5L, PDS5A, BACH1, HINFP, RDM1, CDK9, ERCC4, ALKBH1, JMY, CDK2, RUVBL1, NABP2, NABP1, FBXO6, RAD9A, WRAP53
GOTERM_BP_DIRECT	GO:0006914~autophagy	14	1.54525	0.00398351	WDR45B, BECN2, EI24, ATG9A, PIK3CB, WIPI2, GABARAP, DNM2, MAP1LC3B, MAP1LC3A, EVA1A, LAMP2, ULK1, RAB39
GOTERM_BP_DIRECT	GO:0016567~protein ubiquitination	25	2.75938	0.00592737	KLHL10, FBXO45, RNF7, CBL, SOCS2, RAB40C, ARIH2, FEM1C, FBXO6, RBBP6, VHL, WDTC1, RNF138RT1, WWTR1, TRIM43A, TRIM43C, WSB1, KLHL21, CCNB1IP1, BSPRY, SPSB3, ZC3HC1, RNF125, MKRN1, SDE2
GOTERM_BP_DIRECT	GO:0006511~ubiquitin-dependent protein catabolic process	14	1.54525	0.0229675	RNF11, PSMD13, FBXO45, RNF7, CBL, WDR77, ATXN3, RNF125, WDR81, ARIH2, FEM1C, FBXO6, RBBP6, UBL7
GOTERM_BP_DIRECT	GO:0000045~autophagosome assembly	13	1.43488	7.04657e-06	TMEM41B, WDR45B, BECN2, ATG9A, WIPI2, ATG13, GABARAP, RAB33B, RAB43, MAP1LC3B, MAP1LC3A, RAB19, ULK1
GOTERM_BP_DIRECT	GO:0140588~chromatin looping	12	1.3245	0.00363944	DDX17, DHX33, G3BP1, RUVBL1, DDX20, DDX54, DDX21, ALPL, TOR1B, AK6, CHD1, D1PAS1
GOTERM_BP_DIRECT	GO:0035264~multicellular organism growth	12	1.3245	0.0129962	SLC12A2, WWTR1, RARG, SP2, HESX1, RBBP6, DHCR7, ZFX, GRHL2, SLC25A25, STK40, WDTC1
GOTERM_BP_DIRECT	GO:0055085~transmembrane transport	12	1.3245	0.0495455	GJA1, SLC35E2, ABCC5, SLCO4C1, SLC35E3, SLC19A3, SPNS1, SLC4A11, MPV17, SLC25A44, SLC25A25, SLC25A36
GOTERM_BP_DIRECT	GO:0042274~ribosomal small subunit biogenesis	11	1.21413	0.000258141	RRP7A, FBL, NOM1, TBL3, RPS27, NOB1, WDR3, SURF6, AK6, WDR46, RRP9
GOTERM_BP_DIRECT	GO:0034976~response to endoplasmic reticulum stress	11	1.21413	0.00111953	EIF2B5, PPP2CB, PTPN1, BCL2L11, FICD, TMX1, EIF2AK3, CREBRF, DNAJB9, TRIB3, AFF4
GOTERM_BP_DIRECT	GO:0005975~carbohydrate metabolic process	11	1.21413	0.0018104	CHIT1, B4GALT3, GNPDA1, GLB1, HEXB, PGM3, GPD1L, LCTL, GLA, RENBP, XYLB
GOTERM_BP_DIRECT	GO:0045596~negative regulation of cell differentiation	11	1.21413	0.00316609	GM13057, PRMT5, RARG, GM16367, SMARCC1, PRAMEL7, PRAMEL6, PRAMEL5, PRAMEL4, HES1, GM13043
GOTERM_BP_DIRECT	GO:0008584~male gonad development	11	1.21413	0.0140687	GJA1, SPINK2, PRDX4, BCL2L11, AMHR2, CTSL, KLHL10, TSX, GATA4, NUPR1, CBL
GOTERM_BP_DIRECT	GO:0008380~RNA splicing	11	1.21413	0.045533	SYNCRIP, LGALS3, PPIL1, PUS1, PPP1R8, CWC25, PABPC1, SNRNP35, RBMX, SNRPA, SUGP1
GOTERM_BP_DIRECT	GO:0050821~protein stabilization	14	1.54525	0.0142689	CD74, USP36, CRTAP, MTRR, GLMP, USP29, CLU, SMAD7, CCT6A, WDR81, CHEK2, LAMP2, PIN1, GAPDH
GOTERM_BP_DIRECT	GO:0006351~DNA-templated transcription	10	1.10375	0.00236319	POLR3C, MYC, POLR1C, CDK2, POLR3E, NFATC3, POLR1E, POLR2H, KLF4, HINFP
GOTERM_BP_DIRECT	GO:2001056~positive regulation of cysteine-type endopeptidase activity	10	1.10375	0.00604329	ACER2, MTCH2, BCL2L11, MYC, SLC1A1, EIF2AK3, BCL10, RNF7, BID, D1PAS1
GOTERM_BP_DIRECT	GO:0000387~spliceosomal snRNP assembly	9	0.993377	1.21574e-06	COIL, PRMT5, GEMIN2, GEMIN4, DDX20, GEMIN5, SNRPC, WDR77, SNRPB
GOTERM_BP_DIRECT	GO:2001238~positive regulation of extrinsic apoptotic signaling pathway	9	0.993377	2.39462e-05	TNFRSF12A, TNFSF12, LTA, TRAF2, BCL10, BID, PAK2, BCL2L14, DEDD2
GOTERM_BP_DIRECT	GO:0030512~negative regulation of transforming growth factor beta receptor signaling pathway	9	0.993377	0.00727735	PPM1A, EID2, HDAC1, SPRY2, PIN1, ARID4B, OVOL2, DNM2, SMAD7
GOTERM_BP_DIRECT	GO:0031647~regulation of protein stability	9	0.993377	0.0249303	CTSA, USP36, USP17LD, USP17LE, CASP3, LAMP2, PIN1, USP17LC, USP29
GOTERM_BP_DIRECT	GO:0065003~protein-containing complex assembly	9	0.993377	0.0360397	CD74, GLDC, AXIN1, TSPAN4, HES1, DNAJB14, TRAF2, NUPR1, BID
GOTERM_BP_DIRECT	GO:0030308~negative regulation of cell growth	9	0.993377	0.0388981	CDKN2D, TSPYL2, TCHP, GJA1, SERTAD1, SESN1, EI24, SESN2, D1PAS1
GOTERM_BP_DIRECT	GO:0042273~ribosomal large subunit biogenesis	8	0.883002	9.7279e-05	BOP1, ZFP622, NOP16, NOP2, WDR74, HEATR3, SURF6, SDAD1
GOTERM_BP_DIRECT	GO:0000423~mitophagy	8	0.883002	0.000441417	MAP1LC3B, TIGAR, MAP1LC3A, BECN2, ATG9A, ULK1, ATG13, GABARAP
GOTERM_BP_DIRECT	GO:0072593~reactive oxygen species metabolic process	8	0.883002	0.000643828	SNORD35A, TIGAR, PRDX4, GLS2, SESN1, SESN2, SNORD33, MPV17
GOTERM_BP_DIRECT	GO:0032526~response to retinoic acid	8	0.883002	0.00297902	CDKN2D, ACER2, GJA1, RARG, TFRC, DNAAF2, GATA4, KLF4
GOTERM_BP_DIRECT	GO:0032922~circadian regulation of gene expression	8	0.883002	0.00652694	PRMT5, MYBBP1A, MAGED1, HDAC1, ID2, GFPT1, ID1, CREM
GOTERM_BP_DIRECT	GO:0030218~erythrocyte differentiation	8	0.883002	0.00803633	DYRK3, MIR144, ID2, CASP3, SP3, MIR451A, SLC1A5, PKNOX1
GOTERM_BP_DIRECT	GO:0009267~cellular response to starvation	8	0.883002	0.0186183	MAP1LC3B, MAP1LC3A, WDR45B, CTSL, LAMP2, JMY, WIPI2, PAK2
GOTERM_BP_DIRECT	GO:0000422~autophagy of mitochondrion	7	0.772627	0.000542958	MAP1LC3B, MAP1LC3A, WDR45B, ATG9A, ULK1, WIPI2, GABARAP
GOTERM_BP_DIRECT	GO:1900182~positive regulation of protein localization to nucleus	7	0.772627	0.00126186	WWTR1, HNRNPM, TFRC, SESN2, EIF2AK3, PARP9, IPO7
GOTERM_BP_DIRECT	GO:0002486~antigen processing and presentation of endogenous peptide antigen via MHC class I via ER pathway, TAP-independent	7	0.772627	0.00283419	H2-T22, H2-Q8, H2-Q9, H2-Q6, H2-Q7, H2-D1, H2-Q10
GOTERM_BP_DIRECT	GO:0002476~antigen processing and presentation of endogenous peptide antigen via MHC class Ib	7	0.772627	0.00283419	H2-T22, H2-Q8, H2-Q9, H2-Q6, H2-Q7, H2-D1, H2-Q10
GOTERM_BP_DIRECT	GO:0042254~ribosome biogenesis	7	0.772627	0.00314301	RRP7A, MYBBP1A, GRWD1, NOP2, RPLP0, SURF6, IPO4
GOTERM_BP_DIRECT	GO:0008630~intrinsic apoptotic signaling pathway in response to DNA damage	7	0.772627	0.00658918	BCL2L11, CHEK2, MYC, EI24, IER3, RAD9A, MCL1
GOTERM_BP_DIRECT	GO:0042149~cellular response to glucose starvation	7	0.772627	0.00840499	TBL2, MYBBP1A, CHKA, SESN1, ZC3H12A, SESN2, EIF2AK3
GOTERM_BP_DIRECT	GO:0006913~nucleocytoplasmic transport	7	0.772627	0.00979894	IPO11, CITED1, AXIN1, ANKRD54, RANGAP1, IPO7, IPO4
GOTERM_BP_DIRECT	GO:0006396~RNA processing	7	0.772627	0.00979894	ISG20, TRUB2, RNGTT, DIS3, NOP2, DDX54, EXOSC2
GOTERM_BP_DIRECT	GO:0001916~positive regulation of T cell mediated cytotoxicity	7	0.772627	0.01135	H2-T22, H2-Q8, H2-Q9, H2-Q6, H2-Q7, H2-D1, H2-Q10
GOTERM_BP_DIRECT	GO:0098869~cellular oxidant detoxification	7	0.772627	0.0130666	APOM, PRDX4, GSTO1, SESN1, SESN2, GPX7, HBA-A1
GOTERM_BP_DIRECT	GO:0043124~negative regulation of canonical NF-kappaB signal transduction	7	0.772627	0.0139896	PPM1A, HDAC1, TMSB4X, NKIRAS2, ZC3H12A, SNIP1, KLF4
GOTERM_BP_DIRECT	GO:0000082~G1/S transition of mitotic cell cycle	7	0.772627	0.023054	CDK4, CCNE1, MYC, CDK2, EIF4EBP1, USP29, HINFP
GOTERM_BP_DIRECT	GO:0006006~glucose metabolic process	7	0.772627	0.0272805	SNORD35A, SERP1, MYC, SNORD33, GAPDH, USF1, WDTC1
GOTERM_BP_DIRECT	GO:0016579~protein deubiquitination	7	0.772627	0.0287957	ATXN3, USP36, USP17LD, USP17LE, ZC3H12A, USP17LC, USP29
GOTERM_BP_DIRECT	GO:0045732~positive regulation of protein catabolic process	7	0.772627	0.0371984	GJA1, EGLN2, TNFSF12, AXIN1, CREBRF, TRIB3, IER3
GOTERM_BP_DIRECT	GO:0045727~positive regulation of translation	7	0.772627	0.0409549	EIF2B5, SYNCRIP, SERP1, NSUN5, CDK4, EEF2, D1PAS1
GOTERM_BP_DIRECT	GO:0006164~purine nucleotide biosynthetic process	6	0.662252	0.000281012	PRPS1, IMPDH1, PPAT, IMPDH2, GART, PRPS1L3
GOTERM_BP_DIRECT	GO:0045943~positive regulation of transcription by RNA polymerase I	6	0.662252	0.000805572	UBTFL1, MYBBP1A, DHX33, EIF2AK3, UBTF, DDX21
GOTERM_BP_DIRECT	GO:0031124~mRNA 3'-end processing	6	0.662252	0.00114726	NUDT21, CPSF6, NCBP1, CLP1, CSTF2T, RPRD1B
GOTERM_BP_DIRECT	GO:0001835~blastocyst hatching	6	0.662252	0.00641845	SLC35E2, LPAR6, ARHGDIG, STMN3, PEMT, CRXOS
GOTERM_BP_DIRECT	GO:0000184~nuclear-transcribed mRNA catabolic process, nonsense-mediated decay	6	0.662252	0.00711528	NCBP1, PNLDC1, ZC3H12A, CASC3, PABPC1, SMG5
GOTERM_BP_DIRECT	GO:0045995~regulation of embryonic development	6	0.662252	0.0104313	INO80C, YY1, DR1, YEATS2, RUVBL1, HESX1
GOTERM_BP_DIRECT	GO:0000077~DNA damage checkpoint signaling	6	0.662252	0.0135209	CHEK2, TIPRL, CDC5L, PARP9, HINFP, RAD9A
GOTERM_BP_DIRECT	GO:0006096~glycolytic process	6	0.662252	0.014674	TIGAR, PGAM1, PGAM2, GAPDH, IER3, DHTKD1
GOTERM_BP_DIRECT	GO:0006986~response to unfolded protein	6	0.662252	0.0171737	FICD, FAF2, EIF2AK3, CREBRF, DNAJB9, FBXO6
GOTERM_BP_DIRECT	GO:0034198~cellular response to amino acid starvation	6	0.662252	0.0171737	ATXN3, MAP1LC3A, SESN1, SESN2, EIF2AK3, ULK1
GOTERM_BP_DIRECT	GO:0031334~positive regulation of protein-containing complex assembly	6	0.662252	0.018523	LGALS3, BCL2L11, TFRC, BID, CLU, AJUBA
GOTERM_BP_DIRECT	GO:0006487~protein N-linked glycosylation	6	0.662252	0.0318541	DPAGT1, PMM1, PMM2, GFPT1, PGM3, MGAT2
GOTERM_BP_DIRECT	GO:0002474~antigen processing and presentation of peptide antigen via MHC class I	5	0.551876	0.0023537	H2-Q8, H2-Q9, H2-Q7, H2-D1, H2-Q10
GOTERM_BP_DIRECT	GO:0006383~transcription by RNA polymerase III	5	0.551876	0.0028414	POLR3D, POLR1C, POLR3G, POLR3H, POLR2H
GOTERM_BP_DIRECT	GO:0030162~regulation of proteolysis	5	0.551876	0.0040152	TDPOZ5, PTPN1, TDPOZ4, TDPOZ1, TDPOZ2
GOTERM_BP_DIRECT	GO:0006446~regulation of translational initiation	5	0.551876	0.00632876	NCBP1, ALKBH1, EIF2AK3, EIF4EBP1, BZW1
GOTERM_BP_DIRECT	GO:0060828~regulation of canonical Wnt signaling pathway	5	0.551876	0.0147696	WWTR1, AXIN1, GSKIP, FOLR1, KPNA1
GOTERM_BP_DIRECT	GO:0061077~chaperone-mediated protein folding	5	0.551876	0.0237934	CCT6A, CRTAP, SGTA, FKBP4, CLU
GOTERM_BP_DIRECT	GO:0031333~negative regulation of protein-containing complex assembly	5	0.551876	0.0237934	LAMP2, EIF4EBP1, ULK1, CLU, D1PAS1
GOTERM_BP_DIRECT	GO:2001244~positive regulation of intrinsic apoptotic signaling pathway	5	0.551876	0.0259217	BCL2L11, EI24, NUPR1, BID, CLU
GOTERM_BP_DIRECT	GO:0045089~positive regulation of innate immune response	5	0.551876	0.0281606	CD74, POLR3C, POLR3D, POLR3G, IFI35
GOTERM_BP_DIRECT	GO:0008033~tRNA processing	5	0.551876	0.0329739	TRUB2, WDR4, TPRKB, TSEN2, ADAT3
GOTERM_BP_DIRECT	GO:0006275~regulation of DNA replication	5	0.551876	0.0355493	INO80C, YY1, CHRAC1, RUVBL1, RBBP6
GOTERM_BP_DIRECT	GO:0032481~positive regulation of type I interferon production	5	0.551876	0.0355493	RAB2B, DHX33, G3BP1, GAPDH, D1PAS1
GOTERM_BP_DIRECT	GO:0007595~lactation	5	0.551876	0.0410396	SOCS2, RPLP0, EIF2AK3, UMPS, APRT
GOTERM_BP_DIRECT	GO:1990090~cellular response to nerve growth factor stimulus	5	0.551876	0.0439547	DYNC1LI1, PTPN1, CDC5L, HES1, CBL
GOTERM_BP_DIRECT	GO:1904262~negative regulation of TORC1 signaling	5	0.551876	0.0439547	ATXN3, SESN1, SESN2, AKT1S1, VHL
GOTERM_BP_DIRECT	GO:0006048~UDP-N-acetylglucosamine biosynthetic process	4	0.441501	0.00122245	GNPDA1, GFPT1, UAP1L1, PGM3
GOTERM_BP_DIRECT	GO:0097294~'de novo' XMP biosynthetic process	4	0.441501	0.00122245	IMPDH1, PPAT, IMPDH2, GART
GOTERM_BP_DIRECT	GO:0006177~GMP biosynthetic process	4	0.441501	0.0017942	IMPDH1, PPAT, IMPDH2, GART
GOTERM_BP_DIRECT	GO:0006995~cellular response to nitrogen starvation	4	0.441501	0.0017942	MAP1LC3B, MAP1LC3A, BECN2, GABARAP
GOTERM_BP_DIRECT	GO:1902230~negative regulation of intrinsic apoptotic signaling pathway in response to DNA damage	4	0.441501	0.0085347	CDKN2D, SNAI1, BID, CLU
GOTERM_BP_DIRECT	GO:0034497~protein localization to phagophore assembly site	4	0.441501	0.0102805	WDR45B, ATG9A, WIPI2, ATG13
GOTERM_BP_DIRECT	GO:0045820~negative regulation of glycolytic process	4	0.441501	0.0166796	MTCH2, TIGAR, NUPR1, IER3
GOTERM_BP_DIRECT	GO:2000738~positive regulation of stem cell differentiation	4	0.441501	0.0166796	NUDT21, MTCH2, CRXOS, PWP1
GOTERM_BP_DIRECT	GO:1904294~positive regulation of ERAD pathway	4	0.441501	0.0192077	ATXN3, TMX1, SGTA, EIF2AK3
GOTERM_BP_DIRECT	GO:2000736~regulation of stem cell differentiation	4	0.441501	0.0219354	KDM4C, SMYD5, HDAC1, MTA2
GOTERM_BP_DIRECT	GO:0006360~transcription by RNA polymerase I	4	0.441501	0.0219354	UBTFL1, POLR1C, UBTF, POLR2H
GOTERM_BP_DIRECT	GO:0060392~negative regulation of SMAD protein signal transduction	4	0.441501	0.0313161	EID2, PIN1, OVOL2, SMAD7
GOTERM_BP_DIRECT	GO:2000060~positive regulation of ubiquitin-dependent protein catabolic process	4	0.441501	0.0348393	ATXN3, SGTA, AXIN1, CLU
GOTERM_BP_DIRECT	GO:0008637~apoptotic mitochondrial changes	4	0.441501	0.0348393	CD24A, PPP2CB, RNF7, BID
GOTERM_BP_DIRECT	GO:0031929~TOR signaling	4	0.441501	0.0385581	EVA1A, TIPRL, EIF4EBP1, RHEBL1
GOTERM_BP_DIRECT	GO:0000027~ribosomal large subunit assembly	4	0.441501	0.0385581	BOP1, RPL10L, NOP2, RPLP0
GOTERM_BP_DIRECT	GO:0000380~alternative mRNA splicing, via spliceosome	4	0.441501	0.0465729	DDX17, HNRNPM, NCBP1, SRSF6
GOTERM_BP_DIRECT	GO:0030488~tRNA methylation	4	0.441501	0.0465729	TRMT10A, METTL2, TRMT61A, GTPBP3
GOTERM_BP_DIRECT	GO:1901223~negative regulation of non-canonical NF-kappaB signal transduction	4	0.441501	0.0465729	PPM1A, ZC3H12A, IFI35, D1PAS1
GOTERM_BP_DIRECT	GO:0061713~anterior neural tube closure	3	0.331126	0.00485376	CASP3, FOLR1, GRHL2
GOTERM_BP_DIRECT	GO:0009113~purine nucleobase biosynthetic process	3	0.331126	0.00485376	SHMT1, PPAT, GART
GOTERM_BP_DIRECT	GO:0000480~endonucleolytic cleavage in 5'-ETS of tricistronic rRNA transcript (SSU-rRNA, 5.8S rRNA, LSU-rRNA)	3	0.331126	0.0116733	ABT1, TBL3, UTP23
GOTERM_BP_DIRECT	GO:0006384~transcription initiation at RNA polymerase III promoter	3	0.331126	0.0116733	GTF3C4, GTF3C5, POLR3H
GOTERM_BP_DIRECT	GO:0046655~folic acid metabolic process	3	0.331126	0.0116733	MTRR, SHMT1, FOLR1
GOTERM_BP_DIRECT	GO:0019262~N-acetylneuraminate catabolic process	3	0.331126	0.0160303	GNPDA1, NPL, RENBP
GOTERM_BP_DIRECT	GO:1903573~negative regulation of response to endoplasmic reticulum stress	3	0.331126	0.0160303	LPCAT3, AQP11, CLU
GOTERM_BP_DIRECT	GO:0018401~peptidyl-proline hydroxylation to 4-hydroxy-L-proline	3	0.331126	0.0160303	PRDX4, EGLN2, P4HA2
GOTERM_BP_DIRECT	GO:0060373~regulation of ventricular cardiac muscle cell membrane depolarization	3	0.331126	0.0160303	GJA1, GPD1L, SMAD7
GOTERM_BP_DIRECT	GO:0006689~ganglioside catabolic process	3	0.331126	0.0209662	GM2A, GLB1, HEXB
GOTERM_BP_DIRECT	GO:0009086~methionine biosynthetic process	3	0.331126	0.0264439	MTRR, BHMT2, MTHFR
GOTERM_BP_DIRECT	GO:0038203~TORC2 signaling	3	0.331126	0.0324279	PRR5, SYAP1, SESN2
GOTERM_BP_DIRECT	GO:0006388~tRNA splicing, via endonucleolytic cleavage and ligation	3	0.331126	0.0324279	CLP1, TSEN2, TSEN54
GOTERM_BP_DIRECT	GO:0032263~GMP salvage	3	0.331126	0.0324279	IMPDH1, IMPDH2, APRT
GOTERM_BP_DIRECT	GO:1990481~mRNA pseudouridine synthesis	3	0.331126	0.0324279	TRUB2, PUS1, RPUSD3
GOTERM_BP_DIRECT	GO:0009083~branched-chain amino acid catabolic process	3	0.331126	0.0324279	DBT, BCAT1, SLC25A44
GOTERM_BP_DIRECT	GO:0033572~transferrin transport	3	0.331126	0.0324279	TFRC, DNM2, RAB11B
GOTERM_BP_DIRECT	GO:0000492~box C/D snoRNP assembly	3	0.331126	0.0388842	NUFIP1, ZNHIT3, RUVBL1
GOTERM_BP_DIRECT	GO:0090331~negative regulation of platelet aggregation	3	0.331126	0.0388842	CEACAM1, TMX1, PRKCD
GOTERM_BP_DIRECT	GO:0046500~S-adenosylmethionine metabolic process	3	0.331126	0.0457805	BHMT2, MTHFR, PEMT
GOTERM_BP_DIRECT	GO:0033674~positive regulation of kinase activity	3	0.331126	0.0457805	CD74, ZFP622, AJUBA
