# Supplementary material
Source: Research Square preprint supplement (doi:10.21203/rs.3.rs-7771199/v1)
Supplement: Supplementary file 6 [file 604eefb027a5e7996211ee8b.xlsx]

## Sheet: YGV to YMII transition
Transcriptional dynamics of genes during the YGV-YMII transition
Stable	Decreased	Increased
A2ML1	IFI27	ADH5
A4GALT	ABR	AP3S1
TM4SF1	ACAA1	ATN1
AACS	ACCS	BECN1
AAGAB	ACOT13	C12H2orf76
AAMP	ACOT7	C16H17orf49
AARS	ACOT9	C7H14orf178
CCN2	ACSS3	C7H14orf28
AATF	ADI1	CTSA
ABAT	ADM5	COL6A3
ABCA15	ADNP2	RGCC
ABCA5	ADPRHL2	CLPS
F3	IFI27L2	CNN3
ABCB6	AGAP3	CREB3L1
ABCB7	AGFG1	CRKL
SERPINE1	AGRP	DBR1
S100A10	AIFM2	STOM
ABCC4	AK5	DPPA3
ABCC5	AK6	DUSP5
GJA1	AKAP14	EIF1
ABCD1	AKR1A1	EPHX1
ABCD3	ALG14	FAM135A
ABCD4	ALKBH7	FAM161B
ABCE1	AMDHD2	FAM24B
ABCF1	AMIGO1	FGF12
ABHD11	ANAPC13	FKBP1A
ABHD13	FN1	SPTSSA
ABHD16A	ETFRF1	HSPB6
ABHD17B	ABHD6	CETN3
ABHD18	ANKRD39	GNB1
ABHD3	ANKRD55	SH2D4A
ABHD4	EMP3	GPI
ABHD5	AP2S1	WASF1
ABI1	APOC1	PSMA5
ABI2	APOO	LTA4H
ABITRAM	APRT	EMD
SERPINH1	CSRNP1	RABGGTB
ABL2	ARFRP1	PSMD1
ABLIM1	CNEP1R1	TRIM21
ABO	ARHGDIG	RNF10
ABRAXAS1	ARHGEF10L	CLCN5
ABTB1	ID3	HDAC1
ABTB2	ARL2	LAPTM4A
TMSB10	CD81	HELZ
ACACA	HERPUD1	HIST1H1A
ACAD8	ARMC7	TFAP4
ACADL	FAIM	HMGN2
ACADM	ARPC3	SCYL2
CST3	ARPC5	PPP6C
ACADSB	IFT43	SEC24A
ACAT1	MCFD2	BUD13
ACAT2	ASGR1	STOML3
ACBD3	ASNA1	SLC19A2
ACBD5	BAMBI	ANAPC10
TAGLN	MYL6	IQGAP1
ACER1	ATF5	PIAS1
CYP4V2	ATOX1	CDC27
ACIN1	ATP5F1E	ZNF674
ACLY	ATP5IF1	CCNB1
ACOT2	ATP5MC1	USP10
ACOT4	ATP5MF	SRPK1
ACOX1	ATP5MG	TIMM21
F2RL1	ATP5MPL	SLC4A4
ACP1	ATP5PB	UBIAD1
TIMP1	ATP5PO	PCIF1
ACP5	MCL1	ATF2
ACP6	ATP6V0B	KCTD13
TUBB	ATP6V0E1	PPP2R5C
ACSF3	ATP6V1A	RIOK3
ACSL1	ATPAF2	DENND1C
ACSL3	ATRAID	LAGE3
GSTA3	GET4	TMEM131L
ACSS2	AXIN1	HMG20A
ACTB	AZU1	TNIK
ACTL6A	P4HA2	UFM1
ACTN4	GSTP1	LTN1
ACTR10	CTSL	LIPE
ACTR2	B3GLCT	LITAF
ACTR3	B3GNTL1	MOSPD2
ACTR3B	B4GALT2	LOC100425035
ACVR1	B4GALT4	LOC100429965
CDKN1A	B4GALT7	LOC100430358
ACVR2A	KCTD6	LOC100430578
ACYP1	B9D2	LOC106992808
DUSP1	BAALC	LOC106993227
ADAL	BAG2	LOC106993579
ADAM12	BANF1	LOC106994319
ADAM17	BASP1	LOC106994331
ADAM19	BBC3	LOC106994695
SPINK2	BCAS4	LOC106994786
ADAMTS17	RPL22L1	LOC106994869
ADAMTS3	CAPZA2	LOC106995121
MDK	CRIP1	LOC106995487
ADAR	BEX3	LOC106995580
ADCK1	REEP3	LOC106995785
ADCY2	BGLAP	LOC106996082
ADCY5	BID	LOC106996977
ADCY7	BLOC1S1	LOC106997235
ADCY9	BMS1	LOC106997895
ADD1	TMEM64	LOC106998291
ADD2	LGALS3	LOC106998958
ADD3	BOLA2B	LOC106999065
THBS1	BORCS5	LOC106999945
S100A6	BORCS8	LOC107000705
ACTA2	BPIFB3	LOC107000745
ADGRL1	BRF2	LOC109910386
MAGED2	BTG1	LOC114669760
HMOX1	C10H22orf23	LOC114669819
ADIPOR1	C10H22orf39	LOC114672333
ADIPOR2	C11H12orf10	LOC114672380
ADK	C11H12orf45	LOC114673050
ADNP	NRBF2	LOC114673168
ADO	C13H2orf40	LOC114673268
ADORA2B	C14H11orf1	LOC114673439
ADRA1A	C14H11orf40	LOC114674046
ADRM1	C14H11orf49	LOC114674202
AFAP1L2	C14H11orf53	LOC114674206
AFDN	C14H11orf65	LOC114674224
AFF1	MBD2	LOC114674302
AFF2	C14H11orf98	LOC114675099
AFF3	C15H9orf116	LOC114675109
AFF4	C15H9orf135	LOC114675313
AFTPH	C15H9orf16	LOC114675375
AGAP1	C15H9orf43	LOC114675532
AGGF1	C16H17orf62	LOC114675733
AGL	C16H17orf67	LOC114676632
AGPAT1	C18H18orf21	LOC114676751
AGPAT4	C19H19orf24	LOC114676793
AGPAT5	C19H19orf25	LOC114677626
AGPS	C19H19orf53	LOC114677671
AGT	C1D	LOC114679091
AHCTF1	DESI2	LOC114679282
AHCY	C1H1orf122	LOC114680194
AHSA1	C1H1orf21	LOC693464
AHSA2P	SELENOT	LOC693803
AIDA	C1QBP	LOC693893
AIMP2	ITGB5	LOC693932
AIP	C20H16orf91	LOC694799
CRHBP	C2CD2L	LOC695072
PSME2	C2H3orf14	LOC695959
AK4	POLR1C	LOC696610
AKAP1	C4H6orf52	LOC696801
AKAP10	C5H4orf3	LOC696872
GPX3	COL4A2	LOC697342
AKAP13	C5H4orf48	LOC697705
AKAP2	C6orf125	LOC697721
AKAP8	FHL3	LOC697790
AKAP9	C7H15orf65	LOC698403
AKIRIN1	C8B	LOC698693
AKR1B1	C8H8orf58	LOC699260
AKT1	KLHL21	LOC699918
AKT3	CA10	LOC702425
ALDH18A1	CA5A	LOC703708
ALDH1A2	HNRNPAB	LOC703832
ALDH2	CACFD1	LOC706575
ALDH3A2	PTPA	LOC706715
ALDH6A1	AFG3L2	LOC706718
ALDH7A1	ZFP36L2	LOC706790
ALDH9A1	SERPING1	LOC707323
FOS	WSB1	LOC707369
ALG1	DPP7	LOC707414
ALG11	CALR3	LOC709254
ALG13	RDH11	LOC709583
ALG2	CAPN13	LOC709976
ALG3	OCIAD2	LOC709987
ALG6	ALG5	LOC711421
ALG8	CARHSP1	LOC712661
ALG9	CASC3	LOC715616
ALKBH5	NPLOC4	LOC717340
GREM1	CASKIN1	LOC717494
BEX1	EPHA4	LOC718407
ALOXE3	CAVIN3	LOC719221
ALX3	TDRKH	OXNAD1
AMACR	PMEL	UBE2Q2
AMFR	ABT1	LRRTM4
AMN1	CBY3	ZNF45
AMOTL1	CCDC106	PARL
AMZ2	CCDC107	YIPF5
ANAPC1	CCDC113	SECISBP2
ANAPC11	MAN1B1	MAD2L1
ANAPC15	LYPLA1	TBPL1
ANAPC16	GTPBP4	MAP1LC3B
ANAPC4	AP4M1	LTV1
ANAPC5	PYURF	MBD4
ANGEL1	CCDC163	GMFB
ANGEL2	CCDC167	TRIM36
ANGPT1	CCDC180	ZNF280C
ANK3	MBNL1	UBLCP1
ANKH	CCHCR1	GSTCD
ANKIB1	CCDC28B	KPNA7
ANKMY1	ELOB	NEDD1
ANKRD11	CCDC32	NOP2
ANKRD12	CCDC56	EIF2A
ANKRD13A	CCDC58	SERINC1
ANKRD13C	CCDC63	TPX2
ANKRD17	MIF	ARHGAP18
ANKRD27	YBX3	CARMIL1
ANKRD37	CCDC8	NUP37
ANKRD40	MSRB2	PRPF3
ANKRD42	LRRC58	NMD3
ANKRD45	CCNO	CCR7
ANKRD46	CCNQ	PTPRK
ANKRD49	MOSMO	MED30
ANKRD53	CCS	TRMT5
ANKRD54	FBP1	CHAMP1
ANKRD7	CD164L2	SMC2
ANKS1B	CD2BP2	HAUS4
ANKS3	EIF4EBP1	PROSER1
ANO1	SLC16A9	METTL17
ANO10	TXNIP	ZNF143
ANO2	GNPTAB	FBXO30
ANO4	BTG3	MGST3
ANO6	CDC42EP5	MINPP1
ANXA4	FAM131A	ZNF597
ANXA5	RPP25L	LRRC40
ANXA7	PLEKHJ1	MOB4
ANXA9	CDK5RAP3	GLDC
AOPEP	CDKN3	TBC1D31
AOX1	CDT1	TRIM77
AP1G1	CEND1	NUP88
AP1M1	RPL34	BACH1
AP2M1	CENPM	DUSP18
AP3B2	CENPP	BTG4
AP3D1	CENPW	MFN1
AP3M1	CENPX	WDR75
AP3S2	RPL7L1	MTHFD2
AP4B1	C15H9orf64	RNF38
AP4S1	SRSF2	SKP2
APBA2	CERS4	ASF1B
APBB1	CFAP299	PACRG
APBB2	RPRD1B	SRPX
APC	APP	PIGA
APEH	GLTP	BCL2L10
APEX1	CHCHD7	SPATA22
APEX2	APH1B	USP21
API5	CHGB	MYOCD
APIP	CHIC2	NUP35
APLF	CHID1	WEE2
APLP2	CHKB	NUP160
APMAP	CHMP2A	CDC45
APOA2	CHMP3	MYLK
CRIP2	CHMP4A	GABRR3
APPL1	RASL10A	CXCR2
APPL2	CHRNB1	MTPAP
APTX	VRTN	NETO1
ARAF	TSPAN4	EML6
ARAP3	AEN	IFRD1
ARCN1	CIAO1	NUP153
AREL1	CIAO2A	MELK
ARF1	CIAO3	LRRC17
ARF4	CINP	NEMP1
ARF5	CIRBP	TPD52
ARF6	CKLF	MMUT
ARFGAP3	CLDN10	ANLN
ARFGEF1	CCDC92	WDR20
ARFGEF2	CLIP2	PECR
ARFGEF3	CLN6	OTX2
ARG2	CLPSL2	FANCM
ARHGAP1	CLRN3	CLDN12
PPA1	CLTA	CCDC15
ARHGAP11A	CLTB	MPPE1
ARHGAP12	CLUL1	KLHL3
ARHGAP17	CLYBL	GPR119
ARHGAP20	CMBL	OSR2
ARHGAP21	CMC1	INCENP
ARHGAP26	CMC4	ZHX2
ARHGAP28	CMSS1	OTUD3
ARHGAP32	TMEM123	PCGF1
ARHGAP35	CNBD2	PCSK7
TCF7L2	CNIH3	PDE12
ARHGAP8	CNIH4	PDLIM1
ARHGDIA	DENR	PGM2L1
CLU	CNPY2	PHF21A
ARHGEF12	SPHK1	PLCH2
ARHGEF16	COA1	PIM2
ARHGEF26	COA5	LSR
HTRA1	HEXA	PPT1
ARHGEF33	SLC3A2	ZNF526
ARHGEF39	ZFYVE19	PSMA2
ARHGEF9	COLEC11	LIG3
ARID1A	COMMD1	RBM45
ARID2	COMMD3	RFPL4A
ARID4A	COMMD5	NPM3
ARID4B	COMMD7	RP2
CCT7	COMMD9	SLC43A2
ARIH2	COMT	RRNAD1
ARL1	COP1	HNRNPK
ARL14EP	CD63	EDA
ARL15	TIMM10B	RNF123
ARL2BP	COPS6	RC3H1
ARL3	COPS9	ITCH
ARL4A	COPZ1	SLC31A1
ARL4C	COQ3	SLC38A6
ARL4D	COX14	SNAPC1
ARL5A	COX16	SNRNP48
ARL6	COX17	SPCS2
ARL6IP1	COX19	MYO1C
ARL6IP6	COX20	SRI
ARL8B	COX4I1	STARD3NL
VIM	DTYMK	STEAP1
ARMC2	COX6B1	STRAP
ARMC6	COX7B	SUMO2
ARMC8	COX8A	TALDO1
ARMC9	CPA6	WNK3
YBX1	CPB2	TMEM128
ARMCX5	CPLANE2	TMEM171
ARNT	TMEM41B	TMEM216
ARNTL2	TMEM243	TMEM69
ARPC1A	CPSF4L	RPIA
ARPC1B	MRPL28	TMSB15A
ARPC2	CCNC	TMTC2
ARPC4	CRACR2B	TNFAIP1
ARPC5L	B3GAT3	TUBE1
ARPIN	CRELD2	UBL4B
ARPP19	EHHADH	UGDH
ARSH	CRYBB2	VAC14
ARSK	EPHA2	WDR77
ASAH1	CRYBG1	MED25
ASAH2	CRYBG2	ITGAE
ASAP1	CHCHD1	XRCC4
ASB3	CRYM	ETNK1
ASCC1	CHMP4B	LPXN
ASCC2	CTDNEP1	ZNF211
ASH2L	CTHRC1	ZNF286A
ASIC1	STUB1	ZNF343
ASNSD1	CTNNBIP1	C1GALT1C1
ASPH	CTRC	MAT2B
ASPSCR1	MOGS	ZNF420
ASRGL1	CTSH	HOXB6
ASS1	CUTA	ZNF552
REEP5	CUTC	ANP32E
ASXL1	FAM83F	ZNF682
ASXL2	CYB561D2	DCK
ASZ1	CYC1	PDK1
ATAD1	TFRC
ATAD2B	HNF1A
ATE1	EIF4EBP2
ATF1	NDUFAF3
ATF6	COCH
ATF7	DAZAP1
ATF7IP	DBNL
ATG10	DBP
ATG101	COPRS
ATG13	DCAF15
ATG14	SHISA8
ATG16L1	DCTN3
ATG16L2	TNNT1
ATG2B	DCTPP1
ATG4A	HYAL2
SOX4	DDT
ATG4D	DDX25
ATG9A	PRDX5
ATMIN	SOHLH1
ATP11B	DESI1
FNDC3A	DEXI
ATP13A3	DGAT1
WFDC10A	DGCR6
ATP1A1	DGCR6L
FKBP5	SERPINI1
ATP1B1	DHPS
ATP1B3	DHRS7B
ATP2A2	DHRSX
ATP2B1	YIPF3
ATP2C1	DIABLO
ATP2C2	TACC1
ATP5F1A	DKK4
ATP5F1B	UBP1
ATP5F1C	DMAC1
ATP5MC2	DNAAF1
ATP5MC3	DNAJB2
ATP5MD	DNAJC17
ATP5PD	TIMM29
ATP5PF	LOXL4
ATP6AP1L	DNAL1
ATP6AP2	KRAS
ATP6V0A1	DNASE1
ATP6V0A2	DNM2
CDK4	TP53RK
ATP6V0C	RETREG1
ATP6V1B2	MX1
ATP6V1C1	DNPEP
ATP6V1F	MKX
ATP6V1G1	ID1
TCEAL4	DOK7
ATP8A1	DPCD
ATP8A2	DPEP1
ATP9B	DPH2
ATR	DPH3
ATRN	DPM2
ATRNL1	DPM3
ATXN1	CD276
ATXN1L	DPRX
ATXN2	RAMP1
ATXN2L	DSCAML1
ATXN7	MTCH1
AUH	DTNBP1
AUNIP	NFIL3
AUP1	SMS
AURKB	EGFL7
AURKC	DUT
AUTS2	WDR6
RNF149	TMEM259
AZIN1	GJB6
AZIN2	ECI1
B3GALNT1	KAT8
B3GALNT2	MT3
B3GNT2	NENF
B4GALT1	EEF1AKMT1
B4GALT3	EEF1AKMT4
B9D1	EEF2KMT
BABAM2	EFCAB10
BACE1	PHYH
BACE2	SLC6A5
BACH2	EGLN2
TNFRSF12A	TIMM8B
BAG3	ZBTB18
BAG4	ECHDC3
BAG5	EIF3B
GEM	EIF3D
BAP1	EIF3F
BARX1	CTSV
PRKCI	ISYNA1
BAZ1A	EIF6
BAZ1B	ELAC1
BAZ2B	ELP6
BBIP1	EMC6
BBOF1	EMC7
BBS1	EMG1
BBS12	ENDOG
BBS2	ENHO
BBS5	ENKD1
BBX	SDSL
BCAP29	CD151
BCAR1	POLRMT
BCAR3	CNN1
BCAS1	CMTR2
BCAS2	EPN1
BCAS3	ERCC1
BCCIP	ERH
BCKDHA	ERI3
BCKDHB	ERICH2
BCKDK	JPH1
BCL10	ESRRA
BCL2L11	LEMD2
BCL2L12	MS4A4A
FABP3	CLDN23
BCL7B	ETFB
BCLAF1	COL18A1
BCLAF3	ZDHHC20
BCS1L	EXOSC1
BDH1	EXOSC5
BDH2	EXOSC6
BDP1	NUDT9
BEAN1	GPRC5C
BEND5	FAAP20
BET1L	BUD31
BHLHB9	FADS3
BHMG1	FAF1
BICD2	RNF125
BIN2	FAM120AOS
BIRC5	GSDMD
BIRC6	FAM149A
BLM	FAM151B
BLMH	FAM156A
BLOC1S2	FAM162A
BLOC1S5	ATF4
BLZF1	FAM173A
BMP15	KCNMA1
BMPR1A	FAM181B
EED	HYI
BNIP3	FAM207A
BOC	FAM228A
BOD1	FAM228B
BOD1L1	FAM229B
KTI12	FAM32A
BOLA3	FAM3A
BORA	FAM3B
BORCS7	FAM3D
BPGM	FAM53B
BPIFB2	FAM57A
BPTF	FAM92B
BRAF	SNRPD2
BRCC3	UFD1
BRD1	PPP5C
BRD3	FAU
BRD3OS	LYSMD2
BRD4	FBXL8
BRD7	FBXO22
BRI3	FBXO25
BRI3BP	FBXO6
CFLAR	ACADS
BRIX1	FBXW12
BRK1	FBXW4
BROX	FBXW9
BRPF1	MFAP4
BRPF3	FDPS
BRWD3	FDX2
BSCL2	FERMT1
BSG	GDF6
BTBD18	FGF13
MYD88	FGGY
BTBD2	FH
BTBD9	MOV10
BTF3	FIBP
BTG2	FIGLA
BTRC	FIS1
BUB1	FITM2
LTBP1	FIZ1
BVES	FKBP2
BZW2	LACTB2
C10H20orf194	ARFIP2
C10H20orf197	WWC3
C10H20orf24	BAD
C10H20orf27	FLYWCH2
C11H12orf29	FMC1
C11H12orf4	AAMDC
C11H12orf49	FOXA3
C11H12orf57	TAGLN2
C11H12orf65	FOXR1
C11H12orf66	FOXRED1
C11H12orf74	EDF1
C11H12orf75	FTCD
C11H12orf76	FTH1
C11H12orf77	MRPL17
C13H2orf15	CHRNA5
C13H2orf49	GPX4
DHRS7	CHCHD5
JAK1	GABPB2
C14H11orf54	HDAC11
C14H11orf58	GADD45GIP1
C14H11orf74	GALK1
C14H11orf80	MAPK3
C15H9orf129	GALNT18
C15H9orf153	GALNTL5
C15H9orf78	MTERF1
TPP1	SPCS3
C16H17orf53	GAS6
C16H17orf58	RAB38
C17H13orf42	GATD3A
C18H18orf25	UBE2S
C18H18orf32	GCDH
C18H18orf54	GCHFR
C19H19orf47	RBM10
C19H19orf54	CRELD1
C19H19orf57	GCSH
C19H19orf67	SENP7
C1H1orf109	BRMS1L
C1H1orf112	SNAI1
C1H1orf131	GEMIN2
C1H1orf146	PTPRF
C1H1orf174	GFOD2
C1H1orf35	ATXN7L1
C1H1orf43	SNF8
C1H1orf50	GLRX2
C1H1orf52	GLRX5
C1H1orf53	GPIHBP1
C1H1orf74	GMFG
C1QTNF6	GMPR
C2	GNG3
C20H16orf70	GNG7
C20H16orf71	GOLM1
C20H16orf74	ZNF524
C20H16orf87	GPR108
C2CD3	GPR180
C2CD6	TGM7
C2H3orf33	GPS1
C2H3orf38	GPX1
RAB13	GPX5
C2H3orf70	TRAPPC3L
PSMB10	GRASP
C3H21orf91	GRHPR
C3H7orf25	TRPV4
C3H7orf26	GSDMC
NONO	GSTM3
C4H6orf120	GSTO1
C4H6orf136	GSTZ1
C4H6orf141	GTF2H5
C4H6orf15	GTF3C6
C4H6orf203	GTPBP8
C5H4orf19	TMEM161A
C5H4orf27	GUK1
C5H4orf46	GXYLT1
C6H5orf15	H2AFJ
TMED4	H2AFY
C6H5orf34	H2AFY2
C6H5orf51	HABP4
C6H5orf58	HAP1
C6H5orf63	HARBI1
C7H14orf119	HAS3
C7H15orf40	HAUS7
C7H15orf41	HAUS8
C7H15orf61	HAX1
C8H8orf76	CDH20
C9H10orf143	HDDC2
C9H10orf25	TMEM11
C9H10orf82	HEATR5B
C9H10orf88	HEBP2
C9orf72	FXR2
CA12	HHLA1
CAB39	BFSP2
CABLES1	HINT2
CABLES2	HIST1H2BK
CACNA1A	HMOX2
CACNA1C	HSBP1
CACNA1D	HSCB
CACNA1I	HSD17B3
CACNB2	HSF4
CACNG5	DUXB
CACTIN	HSPE1
CACYBP	DMKN
HSPH1	HTR5A
CADM1	IBA57
CADPS	IDH3B
CADPS2	IER5
PPP2CB	IFNL3
CALM2	IFT20
CALML4	IFT22
CALU	IGFBP1
CAMK1	IL16
CAMK1D	IL3RA
CAMKK2	LHFPL1
CAMTA1	ING1
CAND1	INO80C
CANT1	INPP1
CANX	APOC4
CAP1	CD52
CAPN1	IRF2BPL
CAPN12	IRF3
CAPN14	IRF7
ATF6B	ISCA2
CAPN7	SDHAF3
CD46	ISG20
CAPNS1	IZUMO2
CAPRIN1	JMJD4
CAPRIN2	JOSD2
CARNMT1	JPT1
CARS	JTB
CASC1	KBTBD3
CASC4	EPB42
CASD1	NINJ2
CASP3	KCNK13
CASP6	KCNS3
CASP8	KHK
CASP8AP2	HIGD1C
CASP9	KLHDC9
CASTOR1	KLHL35
CATSPERD	KLRG2
CCN1	KRT10
CAVIN2	KRT16
CBFA2T2	ADPRM
CBFB	KRTAP8-1
CBLB	KRTCAP2
CBLL1	KYNU
SRSF3	L3MBTL2
CBR4	DERL3
CBWD1	LAMTOR1
CBX2	LAMTOR4
CBX3	LAMTOR5
CBX5	LCTL
OLA1	LGALS2
CCDC112	LHB
CCDC115	LIMD2
CCDC117	LIN7B
CCDC126	LLPH
CCDC130	LOC100423098
CCDC138	LOC100423639
CCDC14	LOC100423823
CCDC141	LOC100423889
CCDC146	LOC100424218
SPART	LOC100424258
CCDC151	LOC100424428
CCDC155	LOC100424644
CCDC169	LOC100424768
CCDC170	LOC100424957
IFI35	LOC100426255
CCDC173	LOC100426413
CCDC174	LOC100427153
CCDC178	LOC100427704
CCDC18	LOC100427837
CCDC186	LOC100427951
BIK	LOC100428376
CCDC28A	LOC100428649
CCDC34	LOC100428761
CCDC47	LOC100429232
CCDC50	LOC100429358
CCDC51	LOC100430028
CCDC59	LOC100430352
CCDC6	LOC100430381
RPS27	LOC100430397
CCDC82	LOC100430541
CCDC84	LOC100430669
CCDC85A	LOC100430823
FST	LOC106992329
CCDC88A	LOC106992466
CCDC90B	LOC106992662
CCDC91	LOC106992769
C1GALT1	LOC106992862
PTPN11	LOC106992864
CCKAR	LOC106992872
CPQ	LOC106992878
PLD3	LOC106992888
ZGLP1	LOC106992911
CCN6	LOC106992964
CCND3	LOC106993106
CCNDBP1	LOC106993156
CCNE1	LOC106993211
CCNE2	LOC106993224
CCNG1	LOC106993291
CCNG2	LOC106993307
CCNH	LOC106993384
CCNI	LOC106993411
RNF5	LOC106993447
CCNK	LOC106993526
RALGDS	LOC106993536
CCNL2	LOC106993545
CCNT1	LOC106993547
CCNT2	LOC106993580
CCNY	LOC106993589
CCPG1	LOC106993609
CCSER2	LOC106993693
CCT4	LOC106993764
CCT6A	LOC106993778
CCT6B	LOC106993955
CCT8	LOC106993983
CCZ1	LOC106993996
SIRT1	LOC106994069
PIN1	LOC106994109
CD226	LOC106994117
CD2AP	LOC106994120
CD300LG	LOC106994133
CD302	LOC106994139
CD38	LOC106994200
CD3EAP	LOC106994248
CD40	LOC106994355
CD47	LOC106994530
CD55	LOC106994540
CD58	LOC106994601
CD59	LOC106994640
VCL	LOC106994755
CD70	LOC106994789
CD9	LOC106994800
CD9_1	LOC106994853
CD99	LOC106994875
CDC123	LOC106994941
CDC14A	LOC106995048
CDC14B	LOC106995127
CDC16	LOC106995214
KIAA0232	LOC106995270
TUBA1B	LOC106995304
CDC42	LOC106995347
CDC42BPA	LOC106995352
CDC42BPB	LOC106995383
CDC42EP3	LOC106995573
CDC42SE1	LOC106995612
CDC42SE2	LOC106995688
NOL11	LOC106995707
CDCA4	LOC106995727
CDCA7	LOC106995850
CDCA7L	LOC106995978
CDCP1	LOC106996000
MYADM	LOC106996147
CDH11	LOC106996242
CDH12	LOC106996314
CDH13	LOC106996359
CDH17	LOC106996410
SEC11C	LOC106996453
CDH3	LOC106996503
SLC12A4	LOC106996504
SLC39A11	LOC106996680
CDH8	LOC106996810
CDIP1	LOC106996824
CDK1	LOC106997203
CDK11B	LOC106997328
CDK13	LOC106997434
CDK17	LOC106997478
CDK2	LOC106997519
CDK20	LOC106997522
CDK2AP1	LOC106997603
CDK5	LOC106997711
CDK5RAP1	LOC106997735
CDK7	LOC106997749
CDK8	LOC106997781
CDK9	LOC106997837
CDKL3	LOC106997935
CDKN1C	LOC106997972
CDKN2AIPNL	LOC106998007
CDKN2D	LOC106998034
CDR1	LOC106998060
CDR2	LOC106998127
CDV3	LOC106998129
COX11	LOC106998188
CDYL	LOC106998199
CEBPG	LOC106998255
CEBPZ	LOC106998413
NIPSNAP2	LOC106998492
C6H5orf24	LOC106998527
RPL39	LOC106998675
CENPA	LOC106998750
CENPBD1	LOC106998757
CENPF	LOC106998903
CENPH	LOC106998966
CENPJ	LOC106999057
CENPL	LOC106999121
CENPT	LOC106999143
CENPU	LOC106999152
CENPV	LOC106999277
CEP112	LOC106999278
CKAP4	LOC106999410
CEP128	LOC106999553
CEP135	LOC106999648
CEP164	LOC106999685
MATR3	LOC106999687
TPST2	LOC106999697
FHL2	LOC106999717
CEP41	LOC106999776
CEP55	LOC106999779
CEP63	LOC106999915
CEP70	LOC106999938
MZT1	LOC107000007
CEP78	LOC107000036
CEP85	LOC107000066
CERCAM	LOC107000138
CERS2	LOC107000260
CETN2	LOC107000288
B2M	LOC107000368
CFAP206	LOC107000413
CFAP298	LOC107000414
CFAP36	LOC107000606
STK17A	LOC107000612
SIMC1	LOC107000631
FBXO32	LOC107000687
CFAP61	LOC107000709
ST3GAL2	LOC107000724
CFAP77	LOC107000840
CFAP97	LOC107000898
CFDP1	LOC107000903
CFI	LOC107000969
CGGBP1	LOC107000976
SPTY2D1	LOC107001026
CGRRF1	LOC109910387
CHAC1	LOC114669767
CHCHD2	LOC114669774
CHCHD4	LOC114669780
CHCHD6	LOC114669783
CHCHD8	LOC114669818
CHD1	LOC114669846
SH3RF1	LOC114669847
CHD2	LOC114669848
CHD4	LOC114669857
CHD6	LOC114669885
CHD7	LOC114669974
XPNPEP1	LOC114669976
CHERP	LOC114669987
CHIC1	LOC114670022
BNIP2	LOC114670050
CHMP1A	LOC114670060
CHMP1B	LOC114670306
CHMP2B	LOC114670379
CHMP7	LOC114670419
CHN2	LOC114670433
CHORDC1	LOC114670480
CHP1	LOC114670503
MORF4L2	LOC114670565
CHRAC1	LOC114670579
CHRDL2	LOC114670589
CHRNA7	LOC114670621
CHRNE	LOC114670758
CHST15	LOC114670785
CHST6	LOC114670854
PEMT	LOC114670990
SLC35F6	LOC114670998
CHUK	LOC114671014
CHURC1	LOC114671034
CIAO2B	LOC114671035
CIART	LOC114671043
CIB1	LOC114671084
EFNA3	LOC114671087
CIP2A	LOC114671293
CIPC	LOC114671351
CISD1	LOC114671375
CISD2	LOC114671453
CISD3	LOC114671467
CISH	LOC114671517
CIT	LOC114671532
CIZ1	LOC114671542
CKAP2L	LOC114671716
CKAP5	LOC114671873
CKS2	LOC114671895
CLASP1	LOC114671899
CLASP2	LOC114671902
CLCC1	LOC114672131
CLCN3	LOC114672161
STYXL1	LOC114672172
CLDN11	LOC114672179
RNF6	LOC114672186
SERPINB6	LOC114672254
CLDND1	LOC114672263
SLC39A7	LOC114672287
CLEC16A	LOC114672305
TOB2	LOC114672366
CLGN	LOC114672432
CLHC1	LOC114672439
BZW1	LOC114672628
CLIC6	LOC114672632
CLIP1	LOC114672655
CLK2	LOC114672677
CLK3	LOC114672679
MFSD2A	LOC114672692
CLN3	LOC114672706
CLN5	LOC114672710
CLN8	LOC114672782
CLNS1A	LOC114672805
CLP1	LOC114672819
CLPTM1L	LOC114672828
CLPX	LOC114672865
CLSTN1	LOC114672990
CLTC	LOC114672991
CLTRN	LOC114672993
IGF2BP2	LOC114673052
CLUAP1	LOC114673092
CMAH	LOC114673187
CMAS	LOC114673195
CMC2	LOC114673222
CMKLR1	LOC114673418
CMPK1	LOC114673468
CMTM4	LOC114673472
CMTM6	LOC114673476
CMTM7	LOC114673510
CMTM8	LOC114673567
CMTR1	LOC114673571
CNBP	LOC114673695
C2H3orf80	LOC114673736
CNIH1	LOC114673798
CNKSR1	LOC114673841
TIMMDC1	LOC114673852
ILK	LOC114673856
CNNM1	LOC114673857
CNNM3	LOC114673863
CNOT1	LOC114673961
CNOT11	LOC114674037
NFE2L2	LOC114674048
NT5C3A	LOC114674076
CNOT6L	LOC114674086
CNOT8	LOC114674112
CNOT9	LOC114674126
CNP	LOC114674287
CNPY3	LOC114674333
CNPY4	LOC114674370
CNRIP1	LOC114674404
CNST	LOC114674418
CNTD2	LOC114674419
CNTN1	LOC114674425
OTOP3	LOC114674458
CNTNAP2	LOC114674472
CNTRL	LOC114674748
CNTROB	LOC114674787
FOSL2	LOC114674848
COBLL1	LOC114674885
COG1	LOC114675029
COG2	LOC114675331
COG5	LOC114675467
COG6	LOC114675509
COG7	LOC114675521
COIL	LOC114675522
COL12A1	LOC114675523
COL21A1	LOC114675539
ZYG11B	LOC114675554
ZEB1	LOC114675575
COL28A1	LOC114675582
COL4A3BP	LOC114675599
COL6A5	LOC114675601
ZKSCAN1	LOC114675665
COMMD10	LOC114675703
COMMD2	LOC114675764
ARGLU1	LOC114675778
COMMD8	LOC114675885
COPA	LOC114675912
COPB1	LOC114675927
COPE	LOC114675937
COPG1	LOC114675950
COPS2	LOC114675979
COPS3	LOC114675997
COPS4	LOC114676010
PPIB	LOC114676020
COPS8	LOC114676059
COQ10A	LOC114676071
COQ2	LOC114676205
SLC45A3	LOC114676249
COQ6	LOC114676367
COQ7	LOC114676381
COQ8A	LOC114676402
HNRNPH1	LOC114676441
COQ9	LOC114676471
CORO1B	LOC114676630
CRLF3	LOC114676701
CORO7	LOC114676726
CORT	LOC114676786
COX10	LOC114676806
COX7A2L	LOC114676820
COX7C	LOC114676893
CPA1	LOC114676959
KLC4	LOC114676979
CPD	LOC114677040
CPEB1	LOC114677062
CPEB3	LOC114677066
CPEB4	LOC114677126
CPHXL	LOC114677344
CPLANE1	LOC114677371
RPL35	LOC114677388
APOBEC3G	LOC114677460
CPNE1	LOC114677482
MLPH	LOC114677535
CPNE3	LOC114677587
CPNE4	LOC114677659
CPNE8	LOC114677669
CPNE9	LOC114677772
CPPED1	LOC114678135
MED4	LOC114678136
CPSF3	LOC114678156
CPSF4	LOC114678169
CPSF6	LOC114678243
CPT1A	LOC114678364
CPVL	LOC114678654
FLNA	LOC114678676
CRADD	LOC114678691
CRB3	LOC114678708
CRBN	LOC114678709
CRCP	LOC114678729
CREB1	LOC114678736
CREB3	LOC114678824
CREB3L2	LOC114678831
LIMS1	LOC114678871
CREB3L4	LOC114678873
CREB5	LOC114678907
CREBBP	LOC114678952
CREBL2	LOC114678968
CREG1	LOC114678974
RPL38	LOC114678993
CREM	LOC114679301
CRIPT	LOC114679330
CRISPLD2	LOC114679410
CRK	LOC114679544
RAB31	LOC114679546
CRLS1	LOC114679560
CRNDE	LOC114679572
CRPPA	LOC114679578
C1H1orf198	LOC114679582
G3BP1	LOC114679660
CRTC2	LOC114679689
FDX1	LOC114680150
CRY1	LOC114680190
GSS	LOC114680196
CRYBG3	LOC114680202
IVNS1ABP	LOC114680207
CRYL1	LOC114680209
CRYZ	LOC114680233
CRYZL1	LOC114680284
CS	LOC114680285
ARF3	LOC114680289
CSE1L	LOC114680291
CSF1R	LOC114680325
CSF3R	LOC114680339
CSGALNACT2	LOC114680366
CSK	LOC114680375
CSMD1	LOC114680393
CSNK1A1	LOC114680394
CSNK1D	LOC114680572
CSNK1E	LOC619515
CSNK1G1	LOC693506
TBRG4	LOC693664
CSNK2A1	LOC693702
CSNK2A2	LOC694113
CSNK2B	LOC694417
TMLHE	LOC694859
CSRNP2	LOC695218
MAP2K3	LOC695340
CSTF1	LOC695427
CSTF2	LOC695732
CSTF3	LOC696423
CTBP1	LOC696463
CTBP2	LOC696504
CTC1	LOC696506
SESN2	LOC696855
CTDSP2	LOC696956
CTDSPL	LOC697423
CTDSPL2	LOC697476
CTNNA3	LOC697564
CTNNB1	LOC697586
CTNNBL1	LOC697761
PRPF4B	LOC697802
CTPS1	LOC698075
ARHGAP5	LOC698520
DGKE	LOC698538
CTRB2	LOC698582
CTSB	LOC698665
CTSC	LOC698713
CTSD	LOC698715
CTSD_1	LOC699053
CTSF	LOC699110
C4H6orf62	LOC699693
CTTN	LOC699719
CTTNBP2	LOC700331
CTU2	LOC700425
CTXN3	LOC700550
GANAB	LOC701105
CUEDC2_1	LOC701223
PIGS	LOC701236
CUL3	LOC701279
CUL4A	LOC701369
TSPAN31	LOC701413
CUL5	LOC701661
ECE1	LOC701710
CWC15	LOC701818
CWC27	LOC701909
CWF19L1	LOC702108
ELF2	LOC702581
VDAC2	LOC702796
CXHXorf38	LOC702957
CXHXorf40A	LOC703074
CXHXorf40B	LOC703344
CXHXorf56	LOC703593
CXHXorf58	LOC703641
CXXC1	LOC703685
CXXC4	LOC703919
PLAAT3	LOC704066
CYB5A	LOC704147
NDST1	LOC704440
CYB5D2	LOC704480
ALDOA	LOC704637
CYB5R3	LOC704705
CYB5R4	LOC704833
CYB5RL	LOC705126
CAV1	LOC705546
CYCS	LOC705607
CYFIP2	LOC705636
CYLD	LOC705933
PSMA1	LOC706103
RASL11A	LOC706177
CYP2C18	LOC706246
OSGEP	LOC706528
CYP2C9	LOC706651
CYP2C93	LOC706710
CYP2F1	LOC706794
CYSTM1	LOC707027
CYTH2	LOC707114
CYTH3	LOC707129
DAAM1	LOC707197
DYNC1H1	LOC707227
ITGB1	LOC707468
DAD1	LOC707476
DAND5	LOC707555
DAP	LOC707834
MMP19	LOC708147
DIPK2A	LOC708492
DARS	LOC708673
DARS2	LOC708725
DAXX	LOC709045
DAZAP2	LOC709330
DBF4	LOC709495
DBI	LOC709619
CRIM1	LOC709738
DBT	LOC709980
DCAF1	LOC710189
PPP3CA	LOC710245
DCAF12	LOC710317
DCAF13	LOC710642
DCAF16	LOC710709
SLC25A53	LOC710859
DCAF5	LOC711062
DCAF7	LOC711183
SDC2	LOC711309
TTC19	LOC711508
DCBLD1	LOC711626
DCBLD2	LOC711690
DCC	LOC712154
DCDC1	LOC712324
CDC23	LOC712608
DCLK1	LOC712730
TMEM263	LOC712855
DCP1A	LOC713596
DCP1B	LOC714001
DCP2	LOC714576
DCPS	LOC714620
DCTD	LOC715580
UBE2E2	LOC715898
DCTN4	LOC716074
DCUN1D1	LOC716530
DCUN1D2	LOC716748
DCUN1D5	LOC716974
DCXR	LOC717369
RAPGEF2	LOC717595
RBMXL1	LOC717838
DDB2	LOC717879
TSC22D1	LOC718099
DDHD1	LOC718352
DDHD2	LOC718356
PLOD1	LOC718451
ZNF800	LOC718596
DDIT3	LOC718775
DDIT4	LOC719351
DDOST	LOC719376
DDR1	LOC719437
DDX1	LOC719632
DDX17	LOC719947
DDX19A	LOC720019
DDX21	LOC720636
DDX31	LOC720677
DDX39A	LOC720717
DDX3X	LOC720791
DDX41	LOC720839
BHLHE40	LOC721299
DDX52	LOC721366
DDX54	LOC722212
DDX55	LOC723355
DDX58	LONP1
ASNS	KIAA1614
DDX6	TRPM5
ORC4	LRRC75B
DEAF1	CRYBB3
HSPA13	LRTOMT
DECR2	LSM10
DEDD	LSM2
DEFB115	LSM3
DEFB124	LSM4
DEGS1	LSM5
DEK	LSM6
DENND1A	ADA
PFKFB3	LUZP6
FKBP14	LY86
DENND2A	LYPD6B
LRP10	LYRM7
DENND4C	LYRM9
DENND5A	LYSMD4
DENND5B	MACROD1
MTHFD2L	MAD2L2
TNIP1	MAF1
DEPDC1B	MAGIX
NAA25	MALSU1
DERA	MAMU-E
DERL1	MAN2B1
DERL2	MAP2K2
SARAF	MAP3K11
DET1	MAP4K1
DGAT2	MAPK1
DHX9	MAPK12
DGKI	MAPKAPK2
LAMC1	2025-03-01
DGKZ	2025-03-11
DGLUCY	2025-03-02
DGUOK	MBD3
DHCR7	PYGM
TDRD12	MCEE
PRKAG2	SLC25A21
DHFR	MCOLN3
RPL10A	MCRIP1
IFNGR1	MCRIP2
MEAK7	MCTS1
BPHL	MDH2
PIGT	MED26
DHTKD1	MED28
DHX15	MED31
DHX16	MED8
DHX29	MEIG1
DHX30	MEPCE
DHX32	MESP2
SCARB2	METTL23
DHX36	METTL26
DHX40	METTL5
DHX57	LGALS4
DHX8	MICOS10
DIAPH1	MISP3
DIAPH3	MKKS
DICER1	RBP7
DIP2B	ZFR2
SAMD8	MNX1
SAT1	MOK
DIS3L2	MORN2
DISP1	MPC2
DIXDC1	MPND
DKC1	MPV17L2
DLAT	MRFAP1
DLD	MRPL11
DLEC1	MRPL12
DLG2	MRPL14
LSM12	MRPL16
DLG5	MRPL20
DLGAP1	MRPL21
DLGAP2	CYP2R1
DLGAP4	MRPL23
RRP1B	MRPL27
DLX6	MRPL32
DMAC2	MRPL33
DMAC2_1	MRPL34
DMAC2L	MRPL40
OXA1L	MRPL46
AQP3	MRPL47
DMRT3	MRPL51
DMTF1	MRPL52
DMXL1	MRPL53
DMXL2	MRPL55
ICOSLG	MRPL57
DNAAF2	MRPL58
DNAAF4	MRPS12
GAA	MRPS15
HMGN5	MRPS17
DNAH12	MRPS18C
DNAH17	MRPS21
RPL4	MRPS23
MED9	MRPS24
USP12	MRPS25
DNAJA1	MRPS26
FAM120A	MRPS33
DNAJB11	MRPS7
TCEAL1	MSANTD3
DNAJB14	MSRA
BMPR2	MSRB1
DNAJB5	MT1A
DNAJB6	MT1X
DNAJB9	MTCH2
DNAJC10	MTFMT
DNAJC13	MTFP1
DNAJC14	MTG1
DNAJC15	MTG2
DNAJC16	ZMAT4
DNAJC18	GUCY2F
DNAJC19	MUC20
DNAJC24	MYL10
DNAJC27	MYL4
DNAJC3	GAST
DNAJC5G	MYL6B
DNAJC7	MYOM2
DNAJC8	MZT2B
DNAJC9	NAA10
DND1	NAA38
DNM1L	NACA
DNMT3A	NANOG
DNTTIP2	NANS
DOCK1	NAXE
TSPAN13	PRL
DOCK3	NCBP2
DOCK9	NCBP2AS2
DOHH	FCER2
LASP1	NDUFA11
DOK5	NDUFA12
KDM5B	NDUFA13
DOLK	NDUFA2
DOLPP1	NDUFA3
DONSON	NDUFA4
DPAGT1	NDUFA7
DPEP3	NDUFB11
IFRD2	NDUFB2
NMT2	NDUFB3
DPH6	NDUFB4
DPH7	NDUFB5
DPP3	NDUFB7
DPP6	CDA
DPP8	NDUFC2
IGFBP5	NDUFS3
DPY30	NDUFS4
DR1	NDUFS5
DCAKD	NDUFS6
DRAM2	NDUFS7
FBXL12	NDUFS8
DRC1	NDUFV1
DRC7	NDUFV2
DRG2	NECAB2
DROSHA	NEDD8
DRP2	NEIL2
DSCAM	NELFB
DSCC1	NEUROG2
DSG2	DEFB116
PPP1R13L	NFKBIB
DSTN	HBQ1
DSTYK	NHP2
DTD1	NICN1
DTD2	NIT1
DTNA	NLRP7
DTNB	NME1
TRA2A	NME2
RPS14	NMRK2
DTX1	NMT1
ZNF7	FBXO24
DUPD1	DHODH
DUS3L	NQO2
DUS4L	LYG1
RNPEPL1	TFEC
DUSP11	NSA2
DUSP12	NSMAF
DUSP14	NSMCE1
ADAM9	NT5C3B
TIA1	CALHM4
DUSP22	NT5M
DUSP23	NTHL1
DUSP28	NTMT1
DUSP3	NTPCR
DUSP7	NUDT1
DUXA	NUDT16
SPNS1	NUDT2
DVL2	NUDT22
DXO	NUDT4
ANXA2	NUDT5
DYNC1LI1	NUPR1
DYNC1LI2	REXO4
DYNC2LI1	STX4
NUAK2	SMPD1
DYNLT3	NXN
RPS9	MAP1LC3A
DYRK3	PTGES2
DYRK4	NXT1
CDH2	OBSL1
DZIP3	OC90
E2F4	MVD
MOCS1	CPN1
E2F8	TCEA2
EAF1	SPC24
EAPP	OST4
EARS2	FKBPL
EBAG9	OVCH1
EBF1	OVOL3
IPO11	TMEM186
EBI3	OXLD1
EBNA1BP2	OXSM
EBP	DDX49
EBPL	PACSIN3
ECD	PAFAH1B3
ECH1	PAG1
ECHDC1	GPAT4
ECHDC2	PAM16
ADGRG2	ABLIM2
ECHS1	CC2D1A
EDC4	PARK7
EDEM1	GLIS2
EDEM2	PARVA
MBOAT7	PAXX
RPS3	PBXIP1
EDIL3	PCBD2
EEF1A2	SUN2
EEF1AKMT2	MXD4
EEF1B2	TARBP2
EEF1D	IFFO1
EEF1E1	PCP4
EEF1G	POLR1E
TRIM27	ADGRG3
EEF2K	PDE9A
EEFSEC	CDX1
EEPD1	PDHA1
EFCAB11	PDHB
EFCAB14	ST6GALNAC6
EFCAB2	PDLIM7
EFCAB6	PDRG1
EFCAB7	PDSS1
RANBP1	PDZD9
EFHD2	CDK10
EFL1	NOSIP
ENPP4	KAT5
EFNB2	PFDN2
EFR3A	PFDN5
EGFL6	GBX2
EGLN2_1	SLC35C1
EGLN3	TELO2
EGR1	PGPEP1
EHBP1	PGPEP1L
EHD4	PHETA1
NEK9	PHF10
EID3	PTCD2
EIF1AD	PHLDB3
EIF1AX	DES
EIF2AK1	PHYHD1
EIF2AK2	PPFIA3
EIF2B1	NELFE
EIF2B3	SH3GLB2
EIF2D	SERTAD1
EIF2S1	FZR1
EIF2S2	PIMREG
EIF2S3	PIN4
EIF3A	PIP4P1
EIF3E	PIP5K1B
SCP2	PIR
EIF3H	ING4
EIF3J	GLT8D1
EIF3K	ZNF511
EIF3L	PKN1
EIF3M	KCTD17
EIF4A3	RAP1GAP
EIF4B	PLAAT1
EIF4E1B	BAG1
EIF4E3	AVPI1
EIF4ENIF1	CHTF18
EIF4G1	SLC27A4
EIF4G2	PLEKHA8
EIF4G3	RPH3AL
PSME1	TEDC2
EIF5	PLEKHG7
EIF5A	FDXR
EIPR1	TMED1
ELAC2	PFKM
ELAVL1	VPS51
ELAVL2	ACTR1B
ELF1	PLPP2
FADD	DMWD
ELK1	ST14
ELK3	PMAIP1
TMEM165	EMC10
ELL2	RTN2
ELL3	TEKT5
ELMO2	POLE4
ARMC10	POLR1D
ELMOD2	POLR2D
R3HCC1L	POLR2F
ELMSAN1	POLR2G
ELN	POLR2H
ELOA	POLR2I
SOCS2	POLR2J
ELOC	POLR2L
ELOVL1	POLR3H
ELOVL2	POLR3K
ELOVL3	POMP
ELOVL4	RABL6
ELOVL5	PON3
MACF1	POP4
ELP2	POP5
ELP3	CAMSAP3
ELP4	CSTB
ELP5	MORN3
EMC1	CHAF1A
VMP1	PPCDC
EMC2	SH3BP1
EMC3	WDR13
EMC4	RTN4RL2
EMC8	PCBP3
EME1	PPIL1
EMILIN2	ATG7
EML2	ORAI1
EML4	PPP1R14B
EML5	TUBA4A
ATP6AP1	PPP1R1B
ZNF71	PPP1R2C
EMP2	PINK1
EMSY	PPP2R2D
LATS1	PPP2R5A
NSG1	SH3BP2
ENO1	RFNG
ENOPH1	GFER
ENOX1	PPY
ENOX2	PQBP1
LPGAT1	PRCD
ENPP1	SLC25A10
PSMC3	PRDX2
RBMS1	BOLA1
ENPP5	ZNF560
ENTPD4	OXT
ENTPD5	FABP5
ENTPD6	PRG3
BMP4	VPS26B
ENTR1	PPP1R3D
ENY2	PRKRIP1
APPBP2	DCTN2
EOMES	ESS2
EP300	AVEN
VEZT	GAN
MAML2	PRR5
PRSS23	PRRG2
EPB41L2	INTS1
EPB41L3	PRSS57
CNDP1	MLLT6
EPB41L5	MCAT
SEC23A	TOMM40
CERS6	TRPM2
EPC2	PSMB1
EPCAM	DHX37
EAF2	PSMB5
YWHAG	PSMB7
EPM2AIP1	DNAJA3
EPRS	PSMC2
EPS15	CDC42EP1
EPS8	PSMC3IP
EPS8L3	PSMC5
EPSTI1	MVP
EQTN	PDF
ERAL1	PSMD4
DPM1	PSMD8
ACBD6	TMEM120B
RB1	PSMG3
ERC2	PSMG4
VPS26A	PSTK
ERCC3	TTYH1
SETD2	ASTL
ERCC5	ZNHIT2
ERCC6	PTH1R
ERCC8	PTOV1
ERF	PTPMT1
ERFE	PTPRE
ERG28	FOXK1
ERGIC1	PTRH1
ERGIC2	ARL6IP4
ERGIC3	SLC52A2
ERI1	PXMP2
ERICH1	COPS5
ERICH5	USP50
ERLEC1	MGMT
ERLIN1	RAB22A
ERLIN2	RAB24
ERMP1	RAB32
ATXN10	IRF1
ERP29	RAB3B
ERP44	RABAC1
ERRFI1	RABEP2
ERV3-1	RABL3
ESCO1	RAD23B
ESCO2	RAD54L
ESD	RANGRF
ESF1	GBX1
ESPL1	RASA4B
SLC35B2	NDUFV3
ESRP1	RASSF1
RBM7	NLE1
TWF1	ST3GAL5
ESYT2	RBIS
ESYT3	RBKS
ETFA	PWWP3A
TTC27	AURKAIP1
ETHE1	PFDN6
ZNF217	RBM8A
ETV3	RBMS2
CAT	PIK3CD
ETV5	CBX8
ETV6	TPRN
HMGN3	RCN3
EVC2	SMG9
NUTF2	RDH14
SLC26A11	PMVK
EWSR1	RECQL4
EXD1	PPIF
EXD2	REG1A
PYGB	LRP3
EXOC1	RETREG2
EXOC2	RFC2
EXOC3L2	RFC4
EXOC4	CBFA2T3
EXOC5	DEDD2
EXOC6	ASGR2
XPOT	RFX8
EXOG	RGS10
EXOSC2	RGS14
EXOSC7	WDR18
EXOSC8	RHBDD2
EXOSC9	RHEBL1
EXT1	RHOC
EXT2	RBPMS2
CAV2	RIBC1
EXTL2	TLE6
CDKN2AIP	RIIAD1
EYA2	RIMBP2
EYA3	RIMKLA
EZH1	RBCK1
EZR	ILRUN
F10	ADCK2
F11R	RITA1
F13A1	RNASEH1
MLEC	RNASEH2C
CPNE7	RND2
FAAP24	RNF121
FADS1	RNF139
FADS2	RNF144B
FAF2	RNF181
FAH	RNF187
FAHD1	RNF25
FEM1B	GPANK1
FAM102A	COASY
FAM104A	ROGDI
FAM107B	ROMO1
FAM111A	ROPN1L
NR4A1	NOL3
FAM114A2	RPF1
FAM117A	WRAP53
FAM118A	RPL11
FAM118B	RPL12
FAM120B	B3GALT4
FAM120C	RPL19
FAM122A	RPL23
FAM122B	RPL26
FAM122C	RPL36AL
FAM126A	RPL39L
FAM126B	RPL9
FAM127A	RPLP2
FAM127C	MFSD12
FAM129B	RPS11
FAM136A	CDC34
FAM13A	RPS25
PPIA	RPS27L
FAM156B	RPS6KA1
FAM160A1	RPS6KL1
FAM160A2	MICALL2
FAM160B1	COQ8B
FAM160B2	ECI2
HAS2	RTCB
FAM168B	REEP4
FAM172A	MVK
FAM174A	ASPHD2
FAM177A1	RUNDC1
MAPRE1	RXRB
FAM184B	NOC4L
FAM185A	SALL4
TPI1	RHOD
BCL11A	SAP18
FAM192A	SARNP
WTIP	SART1
FAM200A	HDDC3
FAM200B	EIF1B
FAM204A	SCAND1
FAM205C	ZNF74
FAM20B	NOL12
FAM210A	ID2
FAM210B	SNAI3
FAM214A	PRMT7
FAM216A	HEXIM2
FAM219A	NME5
FAM220A	SCRN2
GALNT1	SDF2
P3H1	SLC6A3
OSGIN2	SDHAF1
FAM234A	SDHAF2
FAM241A	SDHAF4
FAM241B	ATP5F1D
FAM3C	SIRT6
FAM45A	SEC61G
FAM49B	PPP1R37
PCYT2	CD247
FAM53A	SELENOM
NUCB1	SELENOS
FAM71E1	SELENOW
FAM72A	GIPC1
MEX3C	SEM1
SCML2	SEMA4A
FAM83D	RAB40C
IGFBP2	HACD4
FAM89B	SEPTIN1
FAM8A1	MYOZ1
EIF5A2	SERF1A
FAM9C	MOB2
FANCA	HSD11B1L
FANCC	SERPINB8
FANCE	LRRC61
FANCF	FBXW5
FANCG	GMEB2
FANCI	PTPRS
GTF2I	UBE2J2
ARL6IP5	UBXN6
FARS2	SF3B5
FARSB	SFXN4
FASTK	SIPA1
FASTKD2	SGK2
FASTKD3	SH3BGR
FAT1	SH3GL1
FAT2	DYNLRB1
NEURL1B	SHB
FAXDC2	CCDC127
CHN1	ASAP3
RPL7	TRNAU1AP
FBLN5	SIGLEC6
FBLN7	SIL1
DOK1	SIRT2
RAP2B	SIRT5
FBXL15_1	PAGR1
FBXL18	MELTF
FBXL2	DLL3
FBXL20	CKMT2
FBXL21P	ATP5ME
FAM178B	SLC16A10
FBXL6	PGP
FBXL7	CCDC9
DHCR24	LEPROTL1
FBXO11	STARD10
FBXO15	CLPP
SHE	SLC22A31
POLDIP2	C19H19orf38
FBXO27	SDC1
FBXO3	SLC25A11
FBXO36	SLC25A14
FBXO38	RNF113A
FBXO4	SLC25A26
EIF4A1	SLC25A29
FBXO42	SLC25A33
FBXO43	SLC25A35
FBXO45	SLC25A4
FBXO46	ARL9
FBXO48	CYHR1
FBXO8	ILVBL
FBXW2	SLC27A5
FBXW8	GALNT9
FCF1	TRAPPC12
FCGRT	SLC2A4RG
FCGRT_1	SLC2A7
TCTA	MS4A15
FCHO2	SLC35D2
OSMR	SLC36A4
FCHSD2	SLC38A8
FDFT1	PAOX
ABHD10	NR1H3
BAX	EID2
FEM1C	DHDH
FEN1	MRPS34
FERMT2	C1QL4
SNRPB	SLIRP
FEZ2	SLX1A
MIGA2	KLF16
ZNF576	SMARCD2
FGD4	SMDT1
ABRACL	SMIM1
ZC3H4	SMIM2
COTL1	SMIM20
TMTC3	SMIM26
FGF9	SMIM27
FGFR1	SMIM3
FGFR1OP	SMIM4
FGFR1OP2	SMIM7
FGFRL1	SMPD2
FHIT	MRPS22
DUSP2	SMYD3
SLC35E3	E2F1
FHOD3	SNAP29
FICD	SNRNP25
FIG4	SNRNP35
FIGNL1	SNRPC
FIP1L1	SNRPD3
MPIG6B	SNTA1
FKBP15	SNU13
FKBP4	SNUPN
NPAS1	SNX11
FKBP6	SNX21
MFSD10	TMEM187
FMR1	ALKBH4
FLAD1	RPP40
FLCN	SPACA9
FLII	CCSER1
SNX10	BTF3L4
GIPC2	MRPS18A
FLOT1	SPATA24
FLOT2	SPATA33
FLRT2	CEBPZOS
VPS18	SPCS1
FLT1	SPEF1
FLT4	SPOCK3
FMN1	SPOUT1
PRKAB1	SPPL3
FMNL2	SPSB2
ST3GAL4	SPSB3
PLLP	HRAS
FMO5	MRPL9
CDC42EP4	TMEM251
FNBP1L	SRA1
FNBP4	NUDC
FNDC10	SRF
TCF12	SAP30L
FNDC3B	SRM
FNIP2	SRP14
FNTA	STMN1
FNTB	GRAMD1A
FOCAD	SRSF9
FOPNL	SSBP1
LBR	SSNA1
ADGRG1	SSUH2
METTL1	ST3GAL6
FOXJ3	TM4SF19
FOXK2	STAP2
FOXN2	CCDC61
SEPHS1	STIM2
FOXO3	NIT2
ADAP1	PEX16
UBE3C	CCM2
FOXP4	UBXN1
FOXRED2	STPG4
FPGS	PYCR1
FPGT	STX11
FRA10AC1	STX8
FRAT2	TSPAN33
FRG1	LETMD1
FRG1_1	SLC4A11
FRMD4A	SULT2B1
GTF2H4	SPIRE2
FRMD5	SURF6
FRMD6	FAM50A
STRN3	SVBP
FRS2	SWI5
FRZB	SYCE1
FSD1	ARL16
FBXW11	SYF2
FSIP1	STX10
TWSG1	MRM3
WDR44	BLVRB
FTHL17	SYT3
FTL	TACO1
FTO	TAF10
FTSJ3	ZNF622
FUBP1	AP1AR
FUBP3	TAZ
FUCA1	TBC1D10A
FUCA2	SYS1
FUNDC1	TBCD
FUNDC2	SAC3D1
FURIN	RPL14
FUS	PDLIM2
HSPA5	TCEAL2
FUT11	TCF15
DECR1	SHARPIN
FXN	CDCP2
FXYD6	PLEKHH3
FYN	PGLS
FYTTD1	IDH3G
FZD6	TEPP
G3BP2	TESC
G6PC3	TESK1
G6PD	RYBP
GAB1	TEX261
GABARAP	TEX264
TMA16	CCDC69
GABARAPL2	TEX35
GABBR2	SLC39A3
GABPB1	MESP1
GABRA5	TFPT
KIT	PCCA
GAPDH	THAP11
GABRG3	THAP12
HNRNPA3	THAP4
GAD1	THAP6
GADD45A	THAP7
MCAM	MRPL35
CDC73	THRSP
GAL	THYN1
GALC	TIAF1
GALK2	TIAL1
GALNT13	BLVRA
PPP1R12B	TIGIT
RPS4X	TIMM10
GALNT2	TIMM13
LZTS2	TIMM17A
SMAD3	TIMM17B
GALR1	TIMM50
GALT	TIMM8A
RPS18	RTCA
GAPVD1	R3HCC1
GAR1	DVL1
GARS	TRIR
GART	TLCD1
PPP1R1A	TLE1
GAS2L3	YBEY
GASK1A	TRMU
RBFOX2	RALY
DPH5	TM7SF3
GATA6	TMA7
GATAD2A	PRODH2
GATAD2B	TMEM116
GATC	EIF3G
GATM	SNX17
GBE1	TMEM134
GBF1	TMEM141
RPL37A	TMEM147
RPL3	TMEM14C
GCFC2	TMEM160
GCLC	TMEM177
GCLM	TMEM179
GCM1	TMEM185A
GCN1	TMEM190
GCNT3	DUS2
GDA	TMEM205
GDAP1	TMEM206
GDAP2	LGALS12
TPBG	TMEM219
GDF9	NUDT7
GDI1	TMEM230
PRXL2C	TMEM234
GDPD4	GRK2
GDPGP1	TMEM256
GEMIN6	TMEM258
GEMIN7	WDR74
GEMIN7_1	TMEM42
GEMIN8	TMEM54
GEN1	MIEN1
ACADVL	TMEM79
GFPT1	TMEM8B
GFPT2	TMEM95
GFRA1	TMEM99
GFRA3	TMOD1
GFY	PSMD13
GGA3	TNFAIP8L1
GGACT	TNFSF13
GGH	TNFSF4
GGNBP2	TNIP2
GGPS1	SGF29
GGT1	NEK6
TRRAP	TNNC1
ARMH3	TSACC
GHITM	TOMM22
FASN	RRP36
NACC2	RRP9
GPC1	LENG1
GID8	PALM3
CEP85L	TPRKB
[truncated: 7,611 more rows]

## Sheet: OGV to OMII transition
Transcriptional dynamics of genes during the OGV-OMII transition
Stable	Decreased	Increased
AAGAB	A2ML1	IFI27
AAMP	A4GALT	ABCA1
CCN2	AACS	S100A10
AASDH	AARS	TMSB10
ABAT	AATF	CST3
ABCA4	ABCA15	TIMP1
ABCA5	ABCB6	TUBB
ABCB10	ABCB7	SFRP4
ABCC4	ABCD1	ACTR3B
ABCC5	ABHD11	MDK
ABCD3	ABHD13	THBS1
ABCE1	ABHD16A	MAGED2
ABCF1	ABHD17B	IFI27L2
ABHD18	ABHD4	CRHBP
ABHD3	ABI2	GPX3
ABHD5	ABRAXAS1	EMP3
ABI1	ABTB2	AP3S1
ABITRAM	ACAA1	AP4B1
ABL2	ACADL	APIP
ABLIM1	ACAT2	CPM
ABO	ACLY	HTRA1
ACACA	ACOT4	ARPC4
ACAD8	ACOT7	ASS1
ACADM	ACOT9	ATF1
ACADSB	ACP5	ATG10
ACAT1	ACSL1	SOX4
ACBD3	ACSS3	FNDC3A
ACBD5	ACTR3	FKBP5
ACER1	ADAMTS17	BARX1
CYP4V2	ADCK1	BAZ1A
ACIN1	ADCY5	BCCIP
ACOT13	ADI1	FABP3
ACOT2	ADPRHL2	BECN1
ACOX1	AGFG1	BOD1
F2RL1	AGT	BRD4
ACP1	AHCY	BRD7
ACP6	AIDA	BRI3
ACSL3	AIFM2	C11H12orf76
ACSS2	AK5	C14H11orf74
ACTB	AK6	C16H17orf49
ACTL6A	AKAP10	C19H19orf54
ACTN4	AKAP14	C2CD3
ACTR10	AKIRIN1	RAB13
ACTR2	AKR1A1	ARRDC3
ACVR1	AKR1B1	C6H5orf63
ACVR2A	ALDH2	C7H14orf178
ACYP1	ALDH3B2	CACTIN
DUSP1	FOS	CASC4
ADAL	ALG14	CBLB
ADAM12	ALG6	CBLL1
ADAM17	ALKBH7	CCDC173
ADAM19	AMDHD2	CCDC34
ADAMTS3	AMIGO1	CCDC50
ADAR	SPP1	CCNG2
ADCY2	AMZ2	CCNI
ADCY7	ANAPC13	CCNK
ADCY9	ANAPC4	CDC14B
ADD1	ANAPC5	CDC42BPB
ADD2	ANKRD13A	CDH3
ADD3	ANKRD27	CEBPZ
ACTA2	ANKRD39	CENPA
ADH5	ANKRD42	CENPF
ADIPOR1	ANKRD45	CERS2
ADIPOR2	ANKRD55	CFAP77
ADK	ANKRD7	CHCHD8
ADNP	ANKS3	CHIC1
ADNP2	ANXA9	CIAO2B
ADO	AOX1	CIB1
ADORA2B	AP1G1	CKAP2L
ADRA1A	AP1M1	BZW1
ADRM1	AP2M1	CLPS
AFAP1L2	AP2S1	CNN3
AFDN	AP3M1	CNOT9
AFF1	AP3S2	CNTRL
AFF2	APBA2	HNRNPH1
AFF3	APLF	CREB3L2
AFF4	APLP2	CRISPLD2
AFTPH	APMAP	RAB31
AGAP1	APOC1	CRLS1
AGAP3	APOO	CSH2
AGGF1	APRT	CSNK2A2
AGL	APTX	CTDSPL
AGPAT1	ARAF	CYP2F1
AGPAT4	ARFGAP3	CYP3A5
AGPAT5	ARG2	DAZAP2
AGPS	ARHGAP1	PPP3CA
AHCTF1	PPA1	DCAF15
AHSA1	CNEP1R1	DCBLD2
AHSA2P	ARHGAP8	RAPGEF2
AIMP2	ARHGDIG	DDX55
AIP	ARHGEF33	DENND1A
PSME2	CCT7	DNAJC19
AK4	ID3	TSPAN13
AKAP1	ARL2	STOM
AKAP13	ARL3	DPY30
AKAP2	ARL6IP1	DROSHA
AKAP8	ARMC6	TRA2A
AKAP9	ARMC7	RPS14
AKT1	ARNT	DUSP22
AKT3	ARNTL2	DUSP5
ALDH18A1	ARPC3	EAF1
ALDH1A2	ARPC5	RANBP1
ALDH3A2	ASAH2	EIF1
ALDH6A1	ASCC1	EIF5A
ALDH7A1	ASCC2	ELK3
ALDH9A1	ASH2L	EMC4
ALG1	ASNSD1	RASGRP3
ALG11	ASPSCR1	EMILIN2
ALG13	ASRGL1	RBMS1
ALG2	ATAD1	ENTR1
ALG3	ATG101	APPBP2
ALG8	ATG14	EPC2
ALG9	ATG16L1	ERICH1
ALKBH5	ATG16L2	ETHE1
ALOXE3	ATG4A	EXOSC7
AMFR	ATG9A	EXOSC9
AMN1	ATMIN	FADS2
AMOTL1	ATOX1	FAM120B
ANAPC1	ATP1B3	FAM127C
ANAPC11	ATP5F1A	FAM177A1
ANAPC15	ATP5F1B	MAPRE1
ANAPC16	ATP5F1E	BCL11A
ANGEL1	ATP5IF1	FAM24B
ANGEL2	ATP5MC1	FAM71E1
ANGPT1	ATP5MF	IGFBP2
ANK3	ATP5MG	ARL6IP5
ANKH	ATP5PB	FBLN7
ANKIB1	ATP5PO	FAM178B
ANKMY1	MCL1	FBXL6
ANKRD12	ATP6AP2	FBXO43
ANKRD13C	CDK4	TMTC3
ANKRD17	ATP6V0B	FGFR1OP
ANKRD37	ATP6V0C	FMR1
ANKRD40	ATP6V0E1	FNDC3B
ANKRD46	ATP6V1A	FRAT2
ANKRD49	ATP6V1C1	FTHL17
ANKRD54	ATP6V1G1	GAL
ANO1	ATP8A2	GATAD2B
ANO10	ATPAF2	GLS2
ANO2	GET4	HSPB1
ANO4	AUP1	HSPB6
ANO6	AURKB	CETN3
ANXA4	RNF149	GNA11
ANXA5	AXDND1	RNF175
ANXA7	GSTP1	GNB1
AOPEP	B3GNTL1	GNB2
AP3B2	B4GALT2	MIS18A
AP3D1	B4GALT4	SH2D4A
AP4S1	B4GALT7	RBM41
APBB1	B9D2	GPATCH8
APBB2	BAALC	GPC5
APC	BAG2	CDC26
APEH	GEM	RIOK1
APEX1	BANF1	GPM6A
APEX2	BCAP29	ACTR6
API5	BCAR3	RASSF3
CRIP2	BCAS3	EMD
APPL1	BCAS4	PDE7A
APPL2	BCKDHA	CBY1
ARAP3	RPL22L1	GSR
ARCN1	CAPZA2	CALM1
AREL1	BCL7B	HELZ
ARF1	BCS1L	CKAP2
ARF4	BDH2	COMMD6
ARF5	BHLHB9	HIGD1A
ARF6	BID	HIGD2A
ARFGEF1	BIN2	HILPDA
ARFGEF2	BIRC5	HINT1
ARFGEF3	BLMH	ABI3BP
ARFRP1	BLOC1S1	HIST1H3D
ARHGAP11A	BLOC1S2	KLHDC3
ARHGAP12	BLZF1	HMGN2
ARHGAP17	BMP15	UBE2T
ARHGAP20	EED	HNRNPL
ARHGAP21	BMS1	HOMER2
ARHGAP26	BNIP3	HOXA7
ARHGAP28	LGALS3	CWC22
ARHGAP32	KTI12	HSF2BP
ARHGAP35	BOLA2B	ARHGAP19
ARHGDIA	BOLA3	PNPLA4
CLU	BORCS5	KCTD1
ARHGEF10L	BORCS7	ANAPC10
ARHGEF12	BORCS8	IL2RG
ARHGEF16	BPIFB2	IL4
ARHGEF26	BRAF	SNX25
ARHGEF39	BRF2	RBMX2
ARHGEF9	BROX	DTWD1
ARID1A	BTG1	ZC3H13
ARID2	BTG2	SMAD1
ARID4A	BTRC	TBC1D7
ARID4B	BUB1	IRF2
ARIH2	C10H20orf197	CDC27
ARL1	C10H22orf23	EIF5B
ARL14EP	C10H22orf39	NCOA6
ARL15	C11H12orf10	PSMD9
ARL2BP	C11H12orf29	CCNB1
ARL4A	C11H12orf45	C5H4orf33
ARL4C	C11H12orf49	SRPK1
ARL4D	NRBF2	TIMM21
ARL5A	C11H12orf74	SF3B4
ARL6	C11H12orf75	NELFA
ARL6IP6	C13H2orf15	KBTBD4
ARL8B	C13H2orf40	PCIF1
VIM	C14H11orf1	KCTD13
HERPUD1	C14H11orf40	KDM1A
ARMC2	C14H11orf53	KDM6B
ARMC8	C14H11orf65	KIAA1755
ARMC9	C15H9orf116	TAX1BP1
YBX1	C15H9orf129	ITPRID2
ARMCX5	C15H9orf135	KIF27
ARPC1A	C15H9orf153	STRBP
ARPC1B	C15H9orf16	PPP2R5C
ARPC2	C15H9orf43	AKIP1
ARPC5L	C15H9orf78	KLF2
ARPP19	C16H17orf53	KLHDC10
ARPP21	C16H17orf58	TAF3
ARSH	C16H17orf62	KMT2B
ARSK	C16H17orf67	KMT2D
MCFD2	C18H18orf21	KRT15
ASAH1	C18H18orf25	LAGE3
ASAP1	C18H18orf32	TMEM131L
ASB3	C19H19orf24	LDB1
ASGR1	C19H19orf25	LEF1
ASH1L	C19H19orf47	ANKRA2
ASPH	C19H19orf53	LENG8
REEP5	C1D	LEPROT
ASXL1	C1H1orf109	LIN7C
ASXL2	C1H1orf112	KCNC2
ASZ1	C1H1orf146	LOC100425035
ATAD2B	C1H1orf174	LOC100425804
MYL6	SELENOT	LOC100427362
ATE1	C1QBP	LOC100427680
SMARCA1	C20H16orf70	LOC100428069
ATF6	C20H16orf74	LOC100428899
ATF7	C20H16orf91	LOC100429607
ATF7IP	C2CD6	LOC100430578
ATG13	C2H3orf14	LOC100430733
ATG2B	POLR1C	LOC106992792
ATG4D	C2H3orf38	LOC106993074
ATN1	C3H7orf25	LOC106993579
ATP11B	NONO	LOC106993972
ATP13A3	C4H6orf120	LOC106994178
WFDC10A	C4H6orf203	LOC106994418
ATP1A1	C4H6orf52	LOC106994471
ATP1B1	C5H4orf3	LOC106994481
ATP2A2	C6H5orf58	LOC106994733
ATP2B1	C6orf125	LOC106994786
ATP2C1	C7H15orf65	LOC106994869
ATP2C2	C8H8orf76	LOC106994953
ATP5F1C	C9H10orf25	LOC106995114
ATP5MC2	C9H10orf82	LOC106995487
ATP5MC3	C9H10orf88	LOC106995887
ATP5MD	CA10	LOC106995967
ATP5MPL	CA5A	LOC106996191
ATP5PD	CAB39	LOC106996630
ATP5PF	CACFD1	LOC106996977
ATP6AP1L	CACNA1C	LOC106997009
ATP6V0A1	CACNA1D	LOC106997895
ATP6V0A2	CACNA1I	LOC106998043
ATP6V1B2	CACYBP	LOC106998198
ATP6V1F	ZFP36L2	LOC106998533
ATP8A1	CALML4	LOC106998568
ATP9B	CAPN13	LOC106998659
ATR	CD46	LOC106998968
ATRAID	CARHSP1	LOC106999570
ATRN	CARS	LOC106999711
ATRNL1	CASC1	LOC107000942
ATXN1	CASC3	LOC109910386
ATXN1L	CASP3	LOC114669718
ATXN2	CASP9	LOC114670559
ATXN2L	CCN1	LOC114670676
AUH	CAVIN3	LOC114670792
AUNIP	CBFA2T2	LOC114670860
AURKC	TDRKH	LOC114670878
AZIN1	PMEL	LOC114670885
AZIN2	ABT1	LOC114670905
B3GALNT1	CCDC106	LOC114671292
B3GALNT2	CCDC107	LOC114671678
P4HA2	CCDC113	LOC114672251
CTSL	LYPLA1	LOC114672380
B3GLCT	CCDC130	LOC114673050
B3GNT2	GTPBP4	LOC114673167
B4GALT1	SPART	LOC114673168
B4GALT3	PYURF	LOC114673169
B9D1	CCDC163	LOC114673183
BABAM2	CCDC167	LOC114673268
BACE1	CCDC169	LOC114673344
BACE2	IFI35	LOC114673534
BACH2	CCDC180	LOC114674206
TNFRSF12A	CCHCR1	LOC114674393
BAG3	CCDC28A	LOC114674474
BAG4	CCDC32	LOC114674543
BAG5	CCDC51	LOC114675109
BAP1	CCDC56	LOC114675304
BAZ1B	CCDC58	LOC114675313
BAZ2B	CCDC63	LOC114675375
BBIP1	CCDC8	LOC114675383
BBOF1	MSRB2	LOC114675501
BBS1	CCDC90B	LOC114675692
BBS12	CPQ	LOC114675788
BBS2	ZGLP1	LOC114675789
BBS5	CCN6	LOC114675796
BBX	LRRC58	LOC114676061
BCAR1	CCNE2	LOC114676274
BCAS1	CCNH	LOC114676471
BCAS2	RALGDS	LOC114676571
BCKDHB	CCNL2	LOC114677242
BCKDK	CCNO	LOC114677510
BCL10	CCS	LOC114677626
BCL2L12	CCT4	LOC114677660
BCLAF1	CCT6B	LOC114677772
BCLAF3	CD164L2	LOC114678374
BDH1	CD2BP2	LOC114678443
BDP1	CD38	LOC114678575
BEND5	CD40	LOC114679023
BET1L	CDC16	LOC114679282
BHMG1	BTG3	LOC114679352
BICD2	CDC42EP3	LOC114680203
BIRC6	NOL11	LOC114680324
BIVM	RPP25L	LOC693464
BLM	CDCA7L	LOC693699
BLOC1S5	CDH12	LOC693893
BMPR1A	SLC12A4	LOC693932
BOD1L1	CDH8	LOC693947
BORA	CDK1	LOC694062
BPGM	PLEKHJ1	LOC694580
BRCC3	CDK5	LOC694887
BRD1	CDK5RAP1	LOC695130
BRD3	CDK5RAP3	LOC695463
BRD3OS	CDKN2D	LOC695663
BRIX1	CDKN3	LOC695929
BRK1	C6H5orf24	LOC696581
BRPF1	CENPBD1	LOC696801
BRPF3	CENPM	LOC697342
BRWD3	CENPP	LOC697705
BSCL2	CENPT	LOC697790
BSG	CENPX	LOC698256
BTBD18	C15H9orf64	LOC698354
BTBD2	MATR3	LOC698403
BTBD9	TPST2	LOC698693
BTF3	MZT1	LOC699260
LTBP1	CERCAM	LOC699756
BVES	CERS4	LOC699918
BZW2	B2M	LOC700337
C10H20orf194	STK17A	LOC700483
C10H20orf24	SPTY2D1	LOC701473
C10H20orf27	CGRRF1	LOC701983
C11H12orf4	CHCHD4	LOC702174
C11H12orf57	CHCHD7	LOC702389
C11H12orf65	APH1B	LOC702425
C11H12orf66	CHGB	LOC702760
C11H12orf77	CHIC2	LOC702864
C12H2orf76	CHID1	LOC703708
C13H2orf49	BNIP2	LOC704104
DHRS7	CHKB	LOC704238
JAK1	CHMP1A	LOC706718
C14H11orf49	CHMP2A	LOC706970
C14H11orf54	CHMP3	LOC707323
C14H11orf58	CHMP4A	LOC707414
AEBP2	CHMP7	LOC707684
C14H11orf80	RASL10A	LOC708443
C14H11orf98	CHRNB1	LOC709671
C17H13orf42	VRTN	LOC709976
C18H18orf54	CHRNE	LOC709987
C19H19orf57	CIAO1	LOC710137
C19H19orf67	CIAO2A	LOC710961
C1H1orf131	EFNA3	LOC711421
C1H1orf21	CINP	LOC712268
C1H1orf35	CIRBP	LOC713024
C1H1orf43	CISD2	LOC713572
C1H1orf50	CKLF	LOC716879
C1H1orf52	CKS2	LOC717434
C1H1orf53	CLDN10	LOC717626
C1H1orf74	CLDN11	LOC717790
C1QTNF6	RNF6	LOC717831
C2	SLC39A7	LOC718407
C20H16orf71	TOB2	LOC718737
C20H16orf87	CLIP2	LOC721751
C2H3orf33	MFSD2A	FAM222B
C2H3orf70	CLN5	ZSCAN2
C3H21orf91	CLN8	YPEL5
C3H7orf26	CLRN3	ASAP2
C4H6orf136	CLTA	FAM110A
C4H6orf15	CLTB	TRIP11
C5H4orf19	CLUAP1	JARID2
C5H4orf27	CLUL1	PARL
C5H4orf46	CLYBL	OIP5
C5H4orf48	CMBL	CDCA3
C6H5orf15	CMC1	CCDC66
TMED4	CMC4	MAGOH
C6H5orf34	CMSS1	CEP152
C6H5orf51	TMEM123	MAN2A1
C7H14orf119	CNBD2	SMAGP
C7H14orf28	C2H3orf80	MANF
C7H15orf40	CNIH3	RBBP7
C7H15orf41	CNIH4	TBPL1
C7H15orf61	ILK	MAP1B
C8B	CNNM3	MAP1LC3B
C9H10orf143	DENR	MAP2K1
C9orf72	NT5C3A	CACNG7
CA12	CNP	MBD4
HNRNPAB	CNPY3	GMFB
CABLES2	CNPY4	ZNF280C
CACNA1A	OTOP3	PPWD1
CACNB2	COA1	GSTCD
CACNG5	COA5	2025-03-06
CADM1	COG1	EIF2A
CADPS2	COG6	MAZ
PPP2CB	HEXA	MCC
CALM2	COL21A1	MCCC2
CALU	SLC3A2	FOXO1
CAMK1	ZFYVE19	CARMIL1
CAMK1D	COLEC11	NUP37
CAMKK2	COMMD1	CEP295
CAMTA1	COMMD3	MCUB
CAND1	COMMD5	DDX59
CANT1	COMMD7	MED30
CANX	COMMD8	INPP5E
CAP1	COMMD9	ASCC3
CAPN1	COMT	SMC2
CAPN12	COP1	FAM133B
CAPN14	COPE	PROSER1
CAPN7	COPS2	METTL21A
CAPNS1	COPS3	PRDM2
CAPRIN1	COPS4	MFAP2
CAPRIN2	TIMM10B	MGST3
ALG5	COPS6	PAXIP1
CARNMT1	COPS9	MITD1
CASD1	COPZ1	CDC20
CASP6	COQ2	EMX1
CASP8	COQ3	ZNF597
CASP8AP2	SLC45A3	GCC2
CASTOR1	COQ7	MORF4L1
CATSPERD	COQ8A	MOSPD3
CAVIN2	COQ9	MPHOSPH8
CBFB	CRLF3	KIF18A
SRSF3	CORO7	MRPS14
CBR4	COX14	TRIM77
CBWD1	COX16	MRTFA
CBX2	COX17	MRTO4
CBX3	COX4I1	GINS3
NAGA	DTYMK	BLCAP
CBX5	COX6B1	MSX1
CBY3	COX7B	BTG4
OLA1	COX8A	RNF38
CCDC110	KLC4	TOX
CCDC112	CPA6	SRPX
CCDC115	CPHXL	BCL2L10
CCDC117	CPLANE2	MLIP
CCDC126	TMEM41B	MYLIP
CCDC138	TMEM243	USP21
CCDC14	CPNE8	MYZAP
CCDC141	CPSF3	NAA20
CCDC146	CPSF4L	MYLK
CCDC170	CPSF6	NCOR1
CCDC174	CPT2	NDRG3
CCDC178	CPVL	NDUFA6
CCDC18	MRPL28	NDUFB1
MBNL1	CRACR2B	NUP153
CCDC186	CREB1	NEO1
BIK	CREB3	ANLN
ELOB	CREG1	UHRF1
CCDC47	CRELD2	NFAT5
CCDC59	CRKL	WDR20
CCDC6	CRNDE	GPHA2
MIF	G3BP1	IL5RA
RPS27	GSS	NOL4
YBX3	CRYBB2	PTRH2
CCDC82	EPHA2	NOP10
CCDC84	CRYBG2	ASMT
CCDC85A	CRYM	KLHL3
FST	CRYZL1	GPR119
CCDC88A	CSNK1D	NUCKS1
CCDC91	TBRG4	NUDCD2
C1GALT1	MAP2K3	ODC1
CCKAR	CSTF1	OR5A2
PLD3	CSTF3	OSR2
CCND3	SESN2	PABPC1
CCNDBP1	STUB1	PABPC4
CCNE1	CTNNB1	PARP12
CCNG1	CTNNBL1	CD177
RNF5	CTRB2	PCBP1
CCNQ	CTSD	PCBP2
CCNT1	CTSF	OTUD3
CCNT2	CTSH	PCGF1
CCNY	CTU2	PCGF2
CCPG1	CTXN3	CPLX4
CCSER2	GANAB	PFDN4
CCT6A	TSPAN31	PFN1
CCT8	CUTA	PHC2
CCZ1	CUTC	PHC3
PIN1	CWH43	PHF5A
CD226	FAM83F	PIM3
CD2AP	VDAC2	PIP5K1A
CD3EAP	CXHXorf40A	AGPAT3
CD47	CXHXorf40B	ACVR2B
CD55	CXHXorf56	PM20D2
CD58	CXXC1	POLR3GL
CD59	CYB561D2	PPP1R35
VCL	ALDOA	RALBP1
CD70	CYB5R4	MAK
EIF4EBP1	CYB5RL	RBBP5
CD9	CYC1	RBP1
CD9_1	CYCS	RBPMS
CD99	CYP2C18	RFESD
TXNIP	OSGEP	RFPL4A
CDC123	CYP2C9	ILDR2
CDC14A	TFRC	RNPC3
TUBA1B	CYTH2	RPA3
GNPTAB	CYTH3	RPL10
CTSA	DYNC1H1	RPL26L1
CDC42	COCH	RPL27
CDC42BPA	MMP19	RPL30
CDC42SE1	DIPK2A	RPLP1
CDC42SE2	DAZAP1	RPS15A
CDCA4	CRIM1	RPS16
CDCA7	DBNL	RPS19
CDCP1	DBP	RPS2
CDH11	DCAF13	RPS21
CDH13	SDC2	RPS23
CDH17	DCDC1	RRP15
SLC39A11	DCLK1	RSBN1L
CDIP1	TMEM263	RSL1D1
CDK11B	DCPS	RTF1
CDK13	UBE2E2	SALL2
CDK15	TNNT1	SAMD1
CDK17	DCTPP1	SAP30
CDK2	DDB2	SATB1
CDK20	DDHD1	SCARB1
CDK2AP1	DDOST	SCMH1
CDK7	DDX1	SDCCAG8
CDK8	DDX25	SEC61B
CDK9	PRDX5	SEC62
CDKL2	DDX41	SEH1L
CDKL3	ASNS	SELENOP
CDKN2AIPNL	ORC4	SERF2
CDR2	HSPA13	SERINC5
CDT1	DECR2	SET
CDV3	PFKFB3	SFPQ
COX11	DENND2A	MAOA
CDYL	DEPDC1B	SH3KBP1
CEBPG	NAA25	SIN3A
NIPSNAP2	DERL1	SIX2
RPL39	SARAF	SKOR1
RPL34	DESI1	RC3H1
CENPH	DEXI	SLC25A5
CENPJ	DGAT2	SLC35D1
CENPL	DGCR6	SLC38A6
CENPU	DGCR6L	SLC39A4
CENPV	DGLUCY	SLC48A1
CENPW	PRKAG2	SMARCD1
CEP112	DHFR	SNAPIN
CKAP4	DHPS	PGAP1
CEP128	DHRS7B	SNRPF
CEP135	PIGT	SON
FHL2	DHRSX	RCC2
CEP41	DHX16	SPCS2
CEP55	YIPF3	SPRED2
CEP63	DHX40	SRI
CEP70	DIABLO	NHSL1
CEP78	DIAPH1	SRRM1
SRSF2	DIPK1A	SSBP3
CEP85	DISP1	TP53
CETN2	DKK4	STARD3NL
CFAP206	DLEC1	SUB1
CFAP298	DLGAP4	SYCE3
CFAP36	RRP1B	BICC1
CFAP61	DLX6	DCUN1D4
CFAP97	DMAC1	TALDO1
CFDP1	DMAC2	TAOK1
CFI	AQP3	WNK3
CGGBP1	DMRT1	CAMSAP1
CHAC1	ICOSLG	TBL1XR1
CHCHD2	DNAAF1	TBP
CHCHD6	GAA	TCF3
CHD1	DNAH17	TCTEX1D2
SH3RF1	MED9	PRTG
CHD2	DNAJB11	TIGAR
CHD4	DNAJB2	TJP1
CHD6	DNAJB6	ATP9A
CHD7	DNAJB9	TM2D1
CHD9	DNAJC14	TMEM128
XPNPEP1	DNAJC17	TMEM129
CHERP	DNAJC18	TMEM171
CHMP1B	LOXL4	TMEM216
CHMP2B	DNAJC5G	TMEM35B
CHN2	DNAL1	TMSB4X
CHORDC1	DNASE1	TNFSF12
CHP1	DND1	FER
MORF4L2	TP53RK	R3HDM2
CHRAC1	MX1	ZFHX3
CHRDL2	DNPEP	TRAPPC2
CHRNA7	DOHH	TRIOBP
CHST15	LASP1	TRMT112
PEMT	ID1	TMEM164
SLC35F6	KDM5B	UBA6
CHUK	DOLK	UPF1
CHURC1	DOLPP1	USP13
CIART	DPCD	USP25
CIP2A	DPEP1	WARS
CIPC	DPEP3	WASF2
CISD1	DPH2	CPNE2
CISD3	DPH3	ITGAE
CISH	NMT2	YAF2
CIT	DPH7	YME1L1
CKAP5	DPM2	YWHAB
CLASP1	CD276	ZBTB44
CLASP2	DPRX	CELF1
COL6A3	RAMP1	KRR1
CLCC1	ANXA1	IMMP1L
CLCN3	DCAKD	IL23A
STYXL1	DRAM2	PIGF
SERPINB6	FBXL12	ZCCHC3
CLDND1	DRC1	HMG20B
CLEC16A	DRP2	ZDHHC18
RGCC	DSCAML1	BRDT
CLGN	DSG2	PSMB6
CLHC1	DSTN	LPXN
CLIC6	DTD1	C13H2orf68
CLIP1	DTD2	PRDX3
CLK2	MTCH1	MTR
CLK3	NFIL3	DNAJC28
CLN3	SMS	PARD6B
CLN6	ZNF7	CCDC13
CLNS1A	EGFL7	STARD7
CLP1	DUS3L	ZNF260
CLPTM1L	DUSP11	PSMB4
CLPX	TIA1	GBA
CLSTN1	DUSP23	ZNF286A
CLTC	DUSP3	NPM1
CLTRN	DUT	LSM7
CMAH	SPNS1	MFSD14B
CMAS	DXO	DRAP1
CMC2	ANXA2	UTRN
CMKLR1	DYNC2LI1	RAP1GDS1
CMPK1	NUAK2	PCID2
CMTM4	DYNLT3	C1GALT1C1
CMTM6	DYRK3	PDS5B
CMTM7	GJB6	ARV1
CMTM8	MOCS1	ZNF395
CMTR1	EARS2	MAT2B
CNBP	ECHDC1	ZNF462
CNDP2	ECHDC2	PRKACA
CNIH1	ECHS1	DCLK2
CNKSR1	ECI1	ZNF513
TIMMDC1	KAT8	RMI1
CNNM1	NENF	SUDS3
CNOT1	EEF1AKMT1	KRT222
CNOT11	EEF1AKMT2	FBXW7
NFE2L2	EEF1AKMT4	CENPN
CNOT6L	TRIM27	CAPZA1
CNOT8	EEF2K	ANP32E
CNRIP1	EEF2KMT	FAM199X
CNST	EFCAB10	SPTBN1
CNTD2	PHYH	CLIC4
CNTN1	EGFL6	ZNF652
CNTNAP2	EGLN2	NRAS
CNTROB	EID3	ELF5
COBLL1	EIF2AK2	SINHCAF
COG2	ECHDC3	PLEKHA3
COG5	EIF2D	SH3BGRL2
COG7	EIF2S1	ANKRD40CL
COIL	EIF3B	QSOX2
COL12A1	EIF3D	ERO1A
ZEB1	EIF3F	RAB27B
COL28A1	SCP2	ERBIN
ACTN1	EIF3J	DCTN6
COL4A3BP	EIF3L	TMEM254
COL6A5	CTSV	STRIP2
ZKSCAN1	ISYNA1	PPP1CB
COMMD10	EIF6	PHLPP1
COMMD2	ELAC1	PDK1
ARGLU1	ELAC2	ATP11C
COPA	ELK1	ZSWIM7
COPB1	TMEM165
COPG1	ARMC10
CD63	R3HCC1L
PPIB	ELOC
COPS8	ELP2
COQ10A	ELP3
COQ6	ELP6
CORO1B	EMB
CORT	VMP1
COX10	EMC2
COX19	EMC3
COX20	EMC6
COX7A2L	EMC7
COX7C	EMG1
CPA1	ZNF71
CPB2	EMP2
CPD	LATS1
CPEB1	ENHO
CPEB4	ZNF623
RPL35	ENOPH1
CPNE1	ENOX1
CPNE3	SDSL
CPNE4	ENTPD4
CPNE9	EOMES
CPPED1	PRSS23
MED4	CD151
CPSF4	EPB41L5
CCNC	EAF2
CRADD	CNN1
CRB3	CMTR2
CRBN	EPHX1
CRCP	ERAL1
CREB3L1	DPM1
LIMS1	ACBD6
CREB3L4	ERCC1
CREB5	ERCC5
CREBBP	ERGIC3
CREBL2	ERH
RPL38	ERI3
CREM	ERICH2
CRIPT	ATXN10
CRK	ERP29
CRPPA	ESD
C1H1orf198	ESRRA
CRTC2	ESYT3
FDX1	ETFB
CRY1	TTC27
CRYBG3	ZNF217
CHCHD1	ETV6
IVNS1ABP	EVC2
CRYL1	PYGB
CRYZ	EXOSC1
CS	EXOSC5
ARF3	EXOSC8
CSE1L	EXTL2
CSF1R	CDKN2AIP
CSF3R	NUDT9
CSGALNACT2	F10
CSK	F11R
CSMD1	GPRC5C
CSNK1A1	FAAP20
CSNK1E	BUD31
CSNK1G1	TRIM52
CSNK2A1	FADS3
CSNK2B	FAF1
TMLHE	FAH
CSRNP2	FAM118B
CSTF2	FAM122C
CTBP2	FAM126B
CTC1	FAM151B
CTDNEP1	FAM156A
CTDSP2	FAM156B
CTDSPL2	FAM162A
CTHRC1	FAM173A
CTNNA3	FAM174A
CTNNBIP1	FAM185A
CTPS1	TPI1
ARHGAP5	HYI
CTSB	FAM200A
CTSC	FAM207A
C4H6orf62	FAM210A
CTTN	FAM216A
CUEDC2_1	P3H1
PIGS	OSGIN2
CUL3	FAM228A
CUL4A	FAM228B
CUL5	FAM229B
CWC15	FAM234A
CWC27	FAM32A
CWF19L1	FAM3A
CXHXorf38	FAM3B
CXHXorf58	FAM45A
CXXC4	FAM53A
PLAAT3	FAM53B
CYB5A	NUCB1
NDST1	FAM57A
CYB5D2	FAM83D
CYB5R3	FAM89B
CAV1	FAM92B
CYFIP2	EIF5A2
CYLD	SNRPD2
PSMA1	FANCF
RASL11A	FANCG
CYP2C93	FANCI
CYSTM1	FARS2
DAAM1	FARSB
NDUFAF3	UFD1
ITGB1	FASTKD2
DAD1	NEURL1B
DAND5	FAU
DAP	FBLN5
DARS	RAP2B
DARS2	FBXL2
DAXX	POLDIP2
DBF4	FBXO22
DBI	FBXO25
DBR1	EIF4A1
DBT	FBXO42
COPRS	SMTN
DCAF1	FBXO6
DCAF12	FBXO8
DCAF16	ACADS
SLC25A53	FBXW12
DCAF5	FBXW9
DCAF7	MFAP4
DCBLD1	FCF1
DCC	FCGRT
CDC23	TCTA
DCP1A	FDPS
DCP1B	ABHD10
DCP2	FDX2
DCTD	BAX
DCTN3	FERMT1
DCTN4	FGD4
DCUN1D1	FGF13
DCUN1D2	COTL1
DCUN1D5	FGGY
HYAL2	FH
DCXR	FHIT
RBMXL1	DUSP2
TSC22D1	FIBP
DDHD2	FIGLA
PLOD1	FIS1
ZNF800	FITM2
DDIT3	FKBP2
DDIT4	LACTB2
DDR1	FKBP4
DDX17	NPAS1
DDX19A	ARFIP2
DDX31	SNX10
DDX39A	FLOT2
DDX3X	VPS18
DDX52	BAD
DDX54	FLYWCH2
DDX58	PRKAB1
DDX6	ST3GAL4
DEAF1	CDC42EP4
DEDD	FNDC10
DEGS1	AAMDC
DEK	FNTA
FKBP14	FNTB
DENND4C	FOCAD
DENND5A	ADGRG1
DENND5B	METTL1
MTHFD2L	ADAP1
DERA	FOXR1
DERL2	FOXRED1
DET1	FPGS
DHX9	FPGT
DGKI	EDF1
LAMC1	FRZB
DGUOK	FSD1
SERPINI1	FSIP1
DHCR7	WDR44
TDRD12	FTCD
RPL10A	FTH1
IFNGR1	FUCA1
BPHL	FUCA2
DHTKD1	FUNDC1
DHX15	FUS
DHX29	HSPA5
DHX30	DECR1
DHX32	FXN
SCARB2	MRPL17
DHX36	FXYD6
DHX57	CHRNA5
DHX8	G6PC3
DIAPH3	G6PD
DICER1	GPX4
DIP2B	TMA16
SAMD8	GABPB2
SAT1	HDAC11
DIS3L2	GAPDH
DIXDC1	GAD1
DKC1	MCAM
DLAT	GADD45GIP1
DLD	GALK1
DLG2	GALK2
LSM12	GALNT18
DLG5	GALNTL5
DLGAP1	GALR1
DLGAP2	GALT
DMAC2_1	MTERF1
DMAC2L	SPCS3
OXA1L	GAS6
DMRT3	DPH5
DMTF1	UBE2S
DMXL1	GCDH
DMXL2	GCHFR
DNAAF2	GCLM
DNAAF4	RBM10
DNAH12	CRELD1
RPL4	GCNT3
USP12	GCSH
DNAJA1	BRMS1L
TCEAL1	GDF9
DNAJB14	GDPD4
BMPR2	WASHC5
DNAJB5	GDPGP1
DNAJC10	GEMIN2
DNAJC13	GEMIN6
DNAJC15	GEMIN7
DNAJC16	GEMIN8
DNAJC24	ACADVL
DNAJC27	GFOD2
TIMM29	GGACT
DNAJC3	GGH
DNAJC7	GGPS1
DNAJC8	GGT1
DNAJC9	TRRAP
KRAS	GHITM
DNM1L	NACC2
DNMT3A	GIN1
MKX	SULF2
DNTTIP2	GPAA1
DOCK1	SNF8
DOCK8	TOR1AIP1
DOCK9	RRP12
DOK5	TMX3
DONSON	GLMN
DPAGT1	GLO1
IFRD2	GLRX
DPH6	GLRX2
DPM3	GLRX3
DPP3	GLRX5
DPP6	NABP1
DPP8	GMFG
DPPA3	GINS2
IGFBP5	GMPR
DR1	GNA14
DRC7	GNAI3
DRG2	GNG3
DSCAM	GNG7
DSCC1	GNL3
DTNA	GNPDA2
DTNB	GNPNAT1
DTNBP1	CNTN6
DTX1	GOLM1
DUPD1	ZNF524
DUS4L	CDC25C
DUSP12	ARRDC2
DUSP14	SPATA7
ADAM9	TRPV6
DUSP7	GPATCH3
DVL2	CNTN5
CEP170	GPC3
DYNC1LI1	GPKOW
DYNC1LI2	GPR107
RPS9	GPR108
DYRK4	PTBP2
CDH2	TEX30
DZIP3	MXD1
E2F4	GPR180
E2F8	OSCP1
EAPP	CHST4
EBAG9	ZNF830
EBF1	ATG5
IPO11	TGM7
EBLN1	GPR89A
EBNA1BP2	GPS1
EBP	GPS2
EBPL	CCNB2
ECD	GPSM2
ECH1	MBIP
ADGRG2	GPT2
EDC4	GPX1
EDEM1	GPX5
EDEM2	YARS2
RPS3	GPN3
EDIL3	GDI2
MT3	SLC35A5
EEF1B2	GRHPR
EEF1D	SLC6A16
EEF1E1	TRPV4
EEF1G	GRIN2A
EEFSEC	GRIN2B
EEPD1	DUSP19
EFCAB11	GRM8
EFCAB14	KLHDC4
EFCAB2	BANP
EFCAB6	GSDMC
EFCAB7	GSDME
EFHB	GSTK1
EFHD2	GSTM3
EFL1	GSTO1
ENPP4	GSTZ1
EFR3A	GTF2A1L
EGLN2_1	GTF2H2
EGLN3	GTF2H5
EGR1	GTF3A
EHBP1	GTF3C1
EHD4	GTF3C6
NEK9	OSBPL10
TIMM8B	TMEM161A
EIF1AD	GUK1
EIF1AX	GYG1
EIF2AK1	H2AFJ
EIF2B1	H2AFY2
EIF2B3	HACD3
EIF2S2	HADHA
EIF2S3	HADHB
EIF3A	ZNF473
EIF3E	HARBI1
EIF3H	HARS
EIF3K	HARS2
EIF3M	FANCL
EIF4A3	HAT1
EIF4B	HAUS1
EIF4E1B	HAUS2
EIF4E3	HAUS3
EIF4ENIF1	HAUS7
EIF4G1	HAUS8
EIF4G2	HAX1
EIF4G3	ZAR1L
PSME1	HCFC1R1
EIF5	HCRTR2
EIPR1	CDH20
ELAVL1	HDAC2
ELAVL2	HDAC8
ELF1	HDC
ELL2	HDDC2
ELL3	TMEM11
ELMO2	HEATR5B
ELMOD2	RWDD2B
ELMSAN1	HEBP2
ELN	ZCWPW2
ELOA	HDHD3
SOCS2	FXR2
ELOVL1	HHAT
ELOVL2	HHLA1
ELOVL3	HIBCH
ELOVL4	CRNKL1
ELOVL5	NUBP2
ELP4	BFSP2
ELP5	HINT2
EMC1	RGS2
EMC8	HIST1H2AC
EME1	HIST1H2BK
EML4	GFM2
EML5	AKR1E2
ATP6AP1	HMGCL
EMSY	NOB1
NSG1	HMGXB3
ENKD1	HMOX2
ENO1	C13H2orf74
ENOX2	HNRNPH3
LPGAT1	HNRNPLL
PSMC3	HPS3
ENPP5	PIH1D2
ENTPD5	HS3ST4
BMP4	HSBP1
ENY2	HSBP1L1
EP300	HSCB
VEZT	PEX11A
MAML2	HSD17B3
EPB41L2	HSD17B4
EPB41L3	HSF2
CNDP1	HSF4
SEC23A	HSPA14
EPCAM	DUXB
YWHAG	HSPA4L
EPM2AIP1	SLC7A6OS
EPRS	HSPBP1
EPS15	HSPD1
EPS8	HSPE1
EPS8L3	PPEF1
EPSTI1	BET1
EQTN	DMKN
RB1	HTR5A
ERC2	HTRA2
VPS26A	HUS1
ERCC3	HVCN1
ERCC6	SYCP3
ERCC6L2	HYOU1
ERCC8	IAH1
ERFE	IBA57
ERG	TRAIP
ERG28	IDH2
ERGIC2	IDH3A
ERI1	IDH3B
ERI2	WDR45B
ERICH5	IDI1
ERLEC1	SLC3A1
ERLIN1	IER2
ERLIN2	IER5
ERMP1	IFNAR2
JPH1	TTC9C
ERP44	IFT172
ERRFI1	IFT20
ERV3-1	IFT22
ESCO1	IFT46
ESCO2	IFT52
ESF1	IFT88
ESPL1	NLRP8
SLC35B2	IGFBP1
ESRP1	PPP2R2A
RBM7	MAD2L1BP
TWF1	ZCWPW1
MS4A4A	TTC30A
ESYT2	IKBKB
ETFA	UIMC1
ETV3	EPHB4
CAT	IL10RB
ETV5	IL13RA1
HMGN3	ZNF691
NUTF2	TLE2
EWSR1	IL3RA
EXD1	IL4I1
EXD2	LHFPL1
EXOC1	DDX50
EXOC2	TUBD1
EXOC3L2	ANKS4B
EXOC4	IMMT
EXOC5	IMPACT
EXOC6	GORAB
XPOT	INCA1
EXOG	INIP
EXOSC2	INKA1
EXT1	IL1R2
EXT2	INO80C
CAV2	INPP1
EYA2	TIMD4
EYA3	APOC4
EZH1	TRIML2
EZR	INTS4
F13A1	KPNA2
MLEC	IP6K2
FAAP24	CD52
FADS1	ZNF684
FAF2	CD36
FAHD1	IQSEC3
FEM1B	IRF3
FAM102A	IRF7
FAM104A	ISCA2
FAM107B	SDHAF3
FAM111A	ISG20
NR4A1	IST1
FAM114A2	UBA5
FAM117A	ITGA4
FAM118A	PPP2R2B
FAM120AOS	ITM2C
FAM120C	CAST
FAM122A	ITPR3
FAM122B	IZUMO2
FAM126A	JAG2
FAM129B	JAGN1
FAM135A	CZIB
FAM136A	JMJD4
FAM13A	JMJD6
PPIA	JMJD7
FAM155A	JMJD8
FAM160A1	JOSD2
FAM160A2	JPT1
FAM160B2	JTB
HAS2	ZNF571
FAM161B	KARS
ATF4	KATNAL1
FAM168B	KATNB1
FAM172A	KATNBL1
FAM184B	KCMF1
FAM192A	EPB42
WTIP	KCNJ1
FAM200B	NINJ2
FAM204A	KCNK13
FAM205C	HBP1
FAM20B	GTF3C3
FAM210B	KCNS3
FAM214A	SETDB2
FAM219A	CERS5
FAM220A	KHDC1L
FAM241B	KHDC3L
FAM3C	KHK
FAM49B	KIAA0319L
FAM72A	KIAA0930
MEX3C	KIAA1143
SCML2	HIGD1C
FAM8A1	KIF1BP
FAM9C	KIF22
FANCA	KIF25
FANCC	MAPK10
GTF2I	MTFR2
FAR1	NLRP14
FAS	KLF5
FASTK	KLHDC9
FASTKD3	KLHL15
FAT1	KLHL24
FAXDC2	KLHL32
CHN1	KLHL35
RPL7	KLHL36
FBXL15_1	F2
FBXL18	ZFP82
FBXL20	KLK8
FBXL21P	KMT5B
FBXL7	KPNA1
DHCR24	ATG3
FBXO11	KRBOX1
FBXO15	KRBOX4
FBXO27	KRT18
FBXO3	ADPRM
FBXO36	KRTAP19-3
FBXO38	KIF2C
FBXO4	KXD1
FBXO45	KYNU
FBXO47	L3MBTL2
FBXW2	LACC1
FBXW4	SEC23B
FCGRT_1	LAMB4
OSMR	LAMTOR1
FDFT1	LAMTOR4
FDXACB1	LAMTOR5
FEM1C	LANCL1
FEN1	LANCL3
FERMT2	LARS
SNRPB	LAS1L
FEZ2	LCMT1
ABRACL	LCMT2
ZC3H4	LCN8
FGF12	MS4A10
FGF9	LCTL
FGFR1	LDHA
FGFR1OP2	LDHAL6A
FGFRL1	LDOC1
SLC35E3	ZNF607
FHOD3	LGALS2
FICD	ZNF658
FIG4	BRINP1
FIGNL1	SVIP
FIP1L1	LHB
FKBP15	LHFPL2
FKBP1A	LIAS
FKBP6	MIS12
MFSD10	LIMD2
WWC3	LIN7B
FLAD1	LIN9
FLCN	LIPT1
FLII	LIPT2
GIPC2	LITAF
FLOT1	LLPH
FLRT2	THEG
FLT1	SCFD1
FLT4	MACC1
FMC1	LOC100423098
FMN1	LOC100423439
FMNL2	LOC100423625
PLLP	LOC100423639
FNBP1L	LOC100423656
FNBP4	LOC100423889
TCF12	LOC100424003
FOPNL	LOC100424218
LBR	LOC100424689
FOXJ3	LOC100424733
FOXK2	LOC100424768
TAGLN2	LOC100424859
FOXN2	LOC100424869
SEPHS1	LOC100424957
FOXO3	LOC100424971
FOXP4	LOC100425060
FOXRED2	LOC100425173
FRA10AC1	LOC100425528
FRG1	LOC100425856
FRG1_1	LOC100425937
FRMD3	LOC100426255
FRMD6	LOC100426413
FRS2	LOC100426750
FBXW11	LOC100426844
TWSG1	LOC100427042
FTL	LOC100427153
FTO	LOC100427704
FTSJ3	LOC100427840
FUBP1	LOC100427951
FUBP3	LOC100427976
FUNDC2	LOC100428188
FURIN	LOC100428608
FUT11	LOC100428649
FYN	LOC100429190
FYTTD1	LOC100429232
FZD6	LOC100429260
G3BP2	LOC100429350
GAB1	LOC100429403
GABARAP	LOC100429772
GABARAPL2	LOC100430028
CHCHD5	LOC100430381
GABBR2	LOC100430397
GABPB1	LOC100430473
GABRA5	LOC100430500
KIT	LOC100430541
GABRG3	LOC100430850
HNRNPA3	LOC100499503
GADD45A	LOC100499560
CDC73	LOC106992329
GALC	LOC106992348
GALNT13	LOC106992358
PPP1R12B	LOC106992395
RPS4X	LOC106992466
GALNT2	LOC106992625
GALNT7	LOC106992662
RPS18	LOC106992665
GAPVD1	LOC106992769
GAR1	LOC106992808
GARS	LOC106992860
GART	LOC106992864
SPTSSA	LOC106992872
GAS2L3	LOC106992878
GASK1A	LOC106992888
RBFOX2	LOC106992896
GATA6	LOC106993019
GATAD2A	LOC106993025
GATC	LOC106993087
GATD3A	LOC106993106
GATM	LOC106993211
GBE1	LOC106993281
GBF1	LOC106993291
RPL37A	LOC106993326
RPL3	LOC106993384
GCFC2	LOC106993424
GCLC	LOC106993426
GCM1	LOC106993458
GCN1	LOC106993503
GDA	LOC106993529
GDAP1	LOC106993536
GDAP2	LOC106993547
GDI1	LOC106993580
PRXL2C	LOC106993589
GEMIN7_1	LOC106993729
GEN1	LOC106993764
GFPT1	LOC106993782
GFPT2	LOC106993809
GFRA1	LOC106993843
GFRA3	LOC106993851
GFY	LOC106993906
GGA3	LOC106993939
GGNBP2	LOC106993955
ARMH3	LOC106993965
GID8	LOC106993983
GIGYF2	LOC106994057
SKIL	LOC106994069
GINM1	LOC106994117
GINS1	LOC106994120
GINS4	LOC106994123
GIT1	LOC106994139
GJC1	LOC106994200
GK	LOC106994202
GKAP1	LOC106994346
GLB1	LOC106994355
GLB1L3	LOC106994381
GLCCI1	LOC106994386
GLCE	LOC106994392
ERO1B	LOC106994438
GLE1	LOC106994468
GLG1	LOC106994480
GLIPR1	LOC106994488
GLIPR2	LOC106994511
GLMP	LOC106994530
GLOD4	LOC106994543
GLRA2	LOC106994555
NEIL3	LOC106994581
GLUD1	LOC106994583
ZSCAN21	LOC106994590
ZPBP2	LOC106994592
ARHGEF28	LOC106994640
MAP3K4	LOC106994717
PPIG	LOC106994755
GMDS	LOC106994778
GMNN	LOC106994850
GMPPA	LOC106994853
TRAF6	LOC106994875
GNA12	LOC106994924
GRPEL1	LOC106994941
GNAI1	LOC106995085
GNAI2	LOC106995105
FAM168A	LOC106995121
GNAQ	LOC106995127
NUF2	LOC106995159
RAB18	LOC106995206
GNB3	LOC106995210
GNB5	LOC106995270
GNG10	LOC106995286
NSRP1	LOC106995352
GNG12	LOC106995383
GNG2	LOC106995403
SEC22A	LOC106995501
GNG5	LOC106995552
FZD3	LOC106995573
GNL2	LOC106995638
NAA30	LOC106995688
GNPTG	LOC106995707
SCAPER	LOC106995727
GOLGA2	LOC106995779
ANKRD10	LOC106995795
GOLGA4	LOC106995850
SEMA5A	LOC106995906
GOLGA7	LOC106995931
GOLGB1	LOC106995978
GOLIM4	LOC106996000
GOLPH3	LOC106996033
GOLPH3L	LOC106996149
GON7	LOC106996242
GORASP2	LOC106996314
MTRR	LOC106996359
GOSR2	LOC106996367
EXOSC10	LOC106996396
MDH1B	LOC106996398
TOPBP1	LOC106996410
CUBN	LOC106996415
GPAM	LOC106996453
SLC25A40	LOC106996456
GPAT3	LOC106996503
GPATCH1	LOC106996579
GPATCH11	LOC106996680
GPATCH2	LOC106996686
CAMK2G	LOC106996807
GPATCH4	LOC106996810
RMND5A	LOC106996815
TADA2B	LOC106996824
KLHL28	LOC106996859
TRNT1	LOC106996872
GPC6	LOC106997094
GPCPD1	LOC106997152
GPD1L	LOC106997205
GPD2	LOC106997229
TBC1D23	LOC106997241
GPHN	LOC106997267
GPI	LOC106997295
GPLD1	LOC106997433
GPM6B	LOC106997478
USP8	LOC106997514
SNW1	LOC106997517
ADAMTS18	LOC106997519
GPR1	LOC106997522
TMEM150A	LOC106997596
SV2C	LOC106997680
GPR137B	LOC106997711
PRR14L	LOC106997731
ARL11	LOC106997735
CASS4	LOC106997738
VIRMA	LOC106997747
SLC8A1	LOC106997781
GPR160	LOC106997837
WASF1	LOC106997847
KALRN	LOC106997972
MCTP1	LOC106998022
AGTPBP1	LOC106998034
GPR63	LOC106998044
CUL1	LOC106998060
UGGT2	LOC106998172
PSMA5	LOC106998188
ZNF346	LOC106998199
SRP72	LOC106998255
DHRS1	LOC106998272
HACL1	LOC106998274
LTA4H	LOC106998315
NAT2	LOC106998347
LRRC8D	LOC106998434
ATP6V1H	LOC106998452
GRAMD2A	LOC106998492
HSD17B12	LOC106998527
GRB10	LOC106998573
BRCA1	LOC106998622
TADA1	LOC106998673
GREB1	LOC106998750
DDX47	LOC106998757
GRHL3	LOC106998893
TRMT61B	LOC106998899
GRID1	LOC106998903
GRIK2	LOC106998978
GRIK4	LOC106999016
BCL2L13	LOC106999057
CNOT4	LOC106999090
PARS2	LOC106999116
MRPL44	LOC106999143
DIMT1	LOC106999152
BLNK	LOC106999161
LMO3	LOC106999169
GRM4	LOC106999265
GRM5	LOC106999278
NUP155	LOC106999324
GRN	LOC106999441
GRPEL2	LOC106999553
GRTP1	LOC106999565
FBXL5	LOC106999574
SLC5A8	LOC106999621
ZNF281	LOC106999639
GSE1	LOC106999648
GSK3A	LOC106999673
NIFK	LOC106999685
GSKIP	LOC106999687
TARDBP	LOC106999859
ZFPM2	LOC106999915
GNPAT	LOC106999955
RABGGTB	LOC106999956
CENPO	LOC106999967
GSTM4	LOC106999992
GSTM5	LOC107000022
CDS2	LOC107000046
GSTT2B	LOC107000048
GTDC1	LOC107000066
GTF2A1	LOC107000088
GTF2A2	LOC107000153
GTF2B	LOC107000288
PREX1	LOC107000324
ZNF277	LOC107000357
SMIM15	LOC107000371
GTF2H3	LOC107000395
DOCK4	LOC107000413
ETAA1	LOC107000611
SYNJ1	LOC107000631
GTF3C4	LOC107000632
WDR70	LOC107000678
NR1H4	LOC107000685
NSL1	LOC107000705
MORC1	LOC107000717
PSMD1	LOC107000903
GTPBP8	LOC107000969
RCAN2	LOC107000976
GTSF1	LOC107001006
ABCF2	LOC107001038
GUCD1	LOC114669720
CCAR1	LOC114669721
BAIAP2	LOC114669745
KLHL1	LOC114669750
GULP1	LOC114669758
SHTN1	LOC114669774
GXYLT1	LOC114669780
GYG2	LOC114669790
TRIM21	LOC114669791
H2AFX	LOC114669818
H2AFY	LOC114669832
H2AFZ	LOC114669837
RNF10	LOC114669846
CLCN5	LOC114669847
HABP4	LOC114669848
ANKRD26	LOC114669849
HACD2	LOC114669852
FBXL4	LOC114669856
HACE1	LOC114669857
MYRIP	LOC114669869
ZNF131	LOC114669887
STK31	LOC114669974
ZDHHC6	LOC114670022
MBP	LOC114670036
ZNF569	LOC114670040
FBXO33	LOC114670049
OFD1	LOC114670057
HAUS6	LOC114670060
HAVCR1	LOC114670145
RBM46	LOC114670306
HBEGF	LOC114670307
PUSL1	LOC114670367
HBS1L	LOC114670379
HCFC2	LOC114670433
MRNIP	LOC114670450
HCST	LOC114670521
HDAC1	LOC114670544
ZNF829	LOC114670545
HDAC3	LOC114670565
TEX26	LOC114670579
ZCCHC7	LOC114670589
RBM22	LOC114670621
LAPTM4A	LOC114670778
HDAC9	LOC114670785
HDGF	LOC114670804
HDGFL1	LOC114670990
HDGFL3	LOC114671035
HDHD2	LOC114671043
ZC2HC1A	LOC114671066
GIT2	LOC114671087
DDX20	LOC114671293
BCL3	LOC114671373
INPP4B	LOC114671375
HEATR5A	LOC114671412
HECA	LOC114671453
HECTD1	LOC114671467
HECTD2	LOC114671475
HECTD3	LOC114671488
SENP8	LOC114671497
HELLS	LOC114671522
HELQ	LOC114671532
VPS72	LOC114671705
TOP2A	LOC114671716
HEMK1	LOC114671826
HENMT1	LOC114671873
MTF2	LOC114671876
HERC1	LOC114672131
HERC3	LOC114672161
HERC4	LOC114672172
TAF7L	LOC114672186
SF3A1	LOC114672197
SELENOI	LOC114672229
HERPUD2	LOC114672248
LYAR	LOC114672263
ATP6V0A4	LOC114672264
ARL14EPL	LOC114672286
PUS10	LOC114672287
HEXB	LOC114672304
ZNF142	LOC114672324
TFG	LOC114672333
KDF1	LOC114672410
HGS	LOC114672432
HGSNAT	LOC114672447
DCLRE1C	LOC114672450
FMO2	LOC114672574
HIBADH	LOC114672632
GGCT	LOC114672652
HIF1A	LOC114672655
HIF1AN	LOC114672679
BBS4	LOC114672685
SLC35A3	LOC114672701
HIKESHI	LOC114672710
HINT3	LOC114672779
PTPN1	LOC114672788
HIPK1	LOC114672813
HIPK3	LOC114672819
HIRIP3	LOC114672822
HIST1H1A	LOC114672828
HIST1H1D	LOC114672837
HIST1H2BJ	LOC114672847
ADAMTSL3	LOC114672856
BCL9	LOC114672860
ZRANB3	LOC114672865
CNBD1	LOC114672993
RCOR3	LOC114673018
FBXL3	LOC114673023
HLCS	LOC114673026
HLTF	LOC114673052
HM13	LOC114673187
HMBOX1	LOC114673286
TMEM114	LOC114673418
HMCES	LOC114673461
SUCO	LOC114673468
TFAP4	LOC114673472
EPC1	LOC114673494
HMGA1	LOC114673510
HMGB1	LOC114673526
NPY	LOC114673566
CUX1	LOC114673567
HMGCR	LOC114673571
HMGCS1	LOC114673699
HMGN1	LOC114673717
NUP107	LOC114673721
HMGN4	LOC114673736
PHEX	LOC114673748
HMGXB4	LOC114673782
CDK2AP2	LOC114673795
CPSF2	LOC114673798
USP40	LOC114673824
ZNF805	LOC114673829
HNRNPA0	LOC114673841
HNRNPA1	LOC114673852
CHEK2	LOC114673857
GFM1	LOC114673863
HNRNPC	LOC114673961
HNRNPD	LOC114674027
HNRNPDL	LOC114674030
HNRNPF	LOC114674048
ARL13B	LOC114674075
BRWD1	LOC114674176
HNRNPM	LOC114674199
HNRNPR	LOC114674287
CEP57	LOC114674302
HNRNPUL1	LOC114674310
HNRNPUL2	LOC114674404
HOMEZ	LOC114674418
HOOK1	LOC114674425
HOOK3	LOC114674458
AP5S1	LOC114674759
HORMAD2	LOC114674848
KIF3B	LOC114675089
HP	LOC114675128
HP1BP3	LOC114675318
HPCAL1	LOC114675331
USP39	LOC114675341
ZNF510	LOC114675352
HPS5	LOC114675426
SMIM14	LOC114675448
WDPCP	LOC114675449
HPSE2	LOC114675467
LCA5	LOC114675473
FAM76A	LOC114675509
HRH2	LOC114675523
AASDHPPT	LOC114675552
SPRTN	LOC114675553
IPO8	LOC114675589
RAB3GAP1	LOC114675599
KLF7	LOC114675601
SCYL2	LOC114675605
ADPGK	LOC114675665
HSD17B10	LOC114675697
CCDC27	LOC114675703
TUSC3	LOC114675718
MNS1	LOC114675778
CCP110	LOC114675820
NEK1	LOC114675885
HPRT1	LOC114675899
HSDL1	LOC114675903
IQCB1	LOC114675908
GTPBP10	LOC114675927
HSP90AB1	LOC114675961
HSP90B1	LOC114675979
MTFR1	LOC114675993
HSPA1A	LOC114675997
CACNA1E	LOC114676010
HSPB11	LOC114676015
ALK	LOC114676020
MRFAP1L1	LOC114676071
PPP6C	LOC114676077
HTATSF1	LOC114676135
SEC24A	LOC114676215
HTR1D	LOC114676381
KCNJ15	LOC114676396
HTRA3	LOC114676441
HTT	LOC114676630
CSNK1G3	LOC114676685
HUWE1	LOC114676701
ADAM21	LOC114676726
OSBPL3	LOC114676750
TENM2	LOC114676751
CDC40	LOC114676786
IARS	LOC114676806
BRIP1	LOC114676809
OLFM2	LOC114676820
IBTK	LOC114676829
ICA1	LOC114676848
ICA1L	LOC114676893
N4BP2	LOC114676901
GALNT11	LOC114676952
ICE2	LOC114676963
ICK	LOC114676976
KANSL2	LOC114676979
TTF1	LOC114676996
DTX2	LOC114677003
EXOSC3	LOC114677040
CNOT7	LOC114677058
IDH1	LOC114677062
WDR11	LOC114677126
NCOA3	LOC114677344
IER3IP1	LOC114677357
BBS7	LOC114677371
ATP8B4	LOC114677388
DDX4	LOC114677392
BUD13	LOC114677478
LARP1B	LOC114677482
NR2C1	LOC114677483
WWC2	LOC114677587
CDH19	LOC114677622
TICRR	LOC114677628
STOML3	LOC114677659
IFNAR1	LOC114677677
ATP7A	LOC114677684
IFNGR2	LOC114678136
CLINT1	LOC114678156
IFNL3	LOC114678169
TMEM138	LOC114678190
ZMYM5	LOC114678249
SCAMP1	LOC114678346
IFT57	LOC114678406
IFT74	LOC114678435
IFT81	LOC114678465
SLC35A1	LOC114678654
IGF1R	LOC114678691
NUDCD1	LOC114678708
LRRCC1	LOC114678709
LARP7	LOC114678743
RNF4	LOC114678746
SLC19A2	LOC114678757
CSRP2	LOC114678831
MCM2	LOC114678871
IGFLR1	LOC114678907
CNOT10	LOC114678912
TNRC6A	LOC114678952
IGSF11	LOC114678959
ASPM	LOC114678968
GVQW3	LOC114678974
ZNF146	LOC114678980
IGSF9	LOC114679249
NABP2	LOC114679254
ZSCAN32	LOC114679301
IK	LOC114679319
CHEK1	LOC114679320
IKBKG	LOC114679374
IL10	LOC114679412
IL10RA	LOC114679414
IL15RA	LOC114679448
IL16	LOC114679469
TNRC6B	LOC114679560
SLC1A5	LOC114679572
ZNF84	LOC114679578
PABPN1L	LOC114679606
ADAM10	LOC114679615
XRCC1	LOC114679689
IGSF10	LOC114680129
CCDC97	LOC114680150
IL20RA	LOC114680190
FAM189A2	LOC114680202
CIR1	LOC114680207
IDE	LOC114680209
MYOF	LOC114680244
FYB2	LOC114680284
SPHKAP	LOC114680285
WDR47	LOC114680335
CDKAL1	LOC114680339
CCDC150	LOC114680352
ILF2	LOC114680375
RBM27	LOC114680393
ILKAP	LOC114680394
OLFM1	LOC619515
NEMF	LOC693272
BUB3	LOC693354
IMMP2L	LOC693399
IMP3	LOC693438
DHX35	LOC693477
OGG1	LOC693506
ZNF304	LOC693577
IMPDH2	LOC693702
INA	LOC693992
L2HGDH	LOC694113
ING1	LOC694256
ING2	LOC694417
ING3	LOC694543
PHB2	LOC694684
ING5	LOC694743
DAZL	LOC694859
INO80D	LOC694921
ZCCHC8	LOC695050
INPP5A	LOC695122
INPP5B	LOC695218
INTS6	LOC695242
INPP5F	LOC695340
UNC5A	LOC695478
TFAP2D	LOC695495
ALKBH2	LOC695703
INTS10	LOC695732
BNIP1	LOC695844
MYSM1	LOC695923
INTS13	LOC695938
INTS3	LOC696103
RBM25	LOC696118
INTS7	LOC696282
INTS8	LOC696312
INTS9	LOC696393
INVS	LOC696506
IPMK	LOC696855
IPO13	LOC696885
ESR2	LOC696956
IPO7	LOC696959
ADH1B	LOC696998
IPO9	LOC697254
IPP	LOC697256
ZW10	LOC697476
IQCA1	LOC697586
MASTL	LOC697802
NUP58	LOC697810
IQCD	LOC698056
IQGAP1	LOC698075
IQGAP2	LOC698152
IQGAP3	LOC698520
PRMT6	LOC698582
DCDC2	LOC698665
SDCBP	LOC698672
IRAK1BP1	LOC698715
PIAS1	LOC698905
PAN3	LOC699053
IREB2	LOC699110
IRF6	LOC699117
IRF8	LOC699317
UHRF2	LOC699342
MTIF3	LOC699631
USP34	LOC699655
DCAF4L2	LOC699693
ZNF674	LOC699719
ISCA1	LOC700425
ISCU	LOC700544
MAGI3	LOC700550
CTNNA2	LOC700564
LINGO2	LOC700971
ISOC1	LOC701052
VRK1	LOC701105
ZCCHC9	LOC701413
ITFG1	LOC701439
ETFDH	LOC701661
FEZ1	LOC701662
ZNF549	LOC701681
ITGA5	LOC701710
ITGA6	LOC701808
ICE1	LOC701818
ITGA9	LOC702108
ATRX	LOC702418
TBC1D14	LOC702465
STXBP3	LOC702581
MPHOSPH9	LOC702723
METTL22	LOC702796
ITGB3BP	LOC702875
SMC6	LOC703074
ITGBL1	LOC703156
BRD2	LOC703247
ITM2B	LOC703309
ITPA	LOC703490
ITPK1	LOC703550
TRIP12	LOC703593
DDIAS	LOC703641
ITPR1	LOC703685
SMG8	LOC703700
CCDC171	LOC703919
ITPRIPL1	LOC703968
ITSN1	LOC704059
ITSN2	LOC704136
ANP32B	LOC704147
ZNF33B	LOC704173
MTIF2	LOC704440
KIF24	LOC704463
JADE1	LOC704480
PIK3C2A	LOC704637
JADE3	LOC704705
PWP1	LOC704833
LIMS2	LOC704978
XPA	LOC705244
JAKMIP2	LOC705400
POLI	LOC705465
JAM2	LOC705546
EPB41	LOC705607
JAZF1	LOC705611
JCHAIN	LOC705636
NUMB	LOC705696
JKAMP	LOC705797
JMJD1C	LOC705884
JOSD1	LOC706103
ATPSCKMT	LOC706177
JPT2	LOC706246
FCHO1	LOC706340
PRRC1	LOC706496
ZBTB33	LOC706528
UMAD1	LOC706532
USB1	LOC706619
JUP	LOC706646
KANK1	LOC706651
KANK2	LOC706715
SPATA2	LOC706755
WDR48	LOC706790
USP10	LOC706794
DNAJB1	LOC706862
TTC14	LOC706967
KAT2A	LOC707027
WBP11	LOC707129
STXBP4	LOC707197
ZNF132	LOC707215
KAT6B	LOC707459
GABPA	LOC707476
ZC3H8	LOC707549
FAM161A	LOC707555
ZNF280B	LOC707726
KBTBD2	LOC707834
KBTBD3	LOC708096
CCDC148	LOC708147
KBTBD6	LOC708492
AP5M1	LOC708673
ZNF883	LOC708952
ZNF502	LOC709045
KCNAB2	LOC709086
CTNNA1	LOC709103
ZBTB49	LOC709146
TOPORS	LOC709304
AP1S2	LOC709330
USP16	LOC709576
SCYL3	LOC709619
PARPBP	LOC709980
AGK	LOC710189
DTL	LOC710245
NUP62	LOC710477
KCNIP4	LOC710642
SLC4A4	LOC710661
KCNJ16	LOC710682
VWA3A	LOC710709
CNTLN	LOC710759
KCNJ6	LOC710765
MSH2	LOC710859
NECAP2	LOC710897
TXNDC11	LOC711183
ZMYND12	LOC711295
C9H10orf90	LOC711309
UBIAD1	LOC711376
IWS1	LOC711508
ETNPPL	LOC711592
FMN2	LOC711626
ME2	LOC711652
TMC8	LOC711872
FRYL	LOC711890
LRRC42	LOC712182
MAP3K7CL	LOC712203
KCNU1	LOC712324
SP2	LOC712533
ATF2	LOC712608
SNAP23	LOC712730
USP54	LOC713150
COQ10B	LOC713156
KCTD2	LOC713332
INSL6	LOC713482
KCTD21	LOC713490
KCTD3	LOC713596
CEP97	LOC713683
KCTD5	LOC713695
NGDN	LOC713879
DSN1	LOC714001
KCTD9	LOC714217
HJURP	LOC714226
KDELR2	LOC714343
[truncated: 4,395 more rows]
