# Supplementary material
Source: Research Square preprint supplement (doi:10.21203/rs.3.rs-7771199/v1)
Supplement: Supplementary file 7 [file 72ec0c29adc612c9a8e52c37.xlsx]

## Sheet: DEG in OMII vs YMII
Differentially expressed genes in OMII vs YMII
Gene symbol	Pvalue	Log2FoldChange	Adjusted P-value	Status
ABI3BP	2.32499e-09	1.13603	5.80131e-05	up
ACTR6	9.42242e-09	1.41113	0.000235108	up
AGPAT3	8.78022e-10	1.32975	2.19084e-05	up
ANK2	3.81952e-18	1.15667	9.53047e-14	up
ANKRA2	9.66878e-08	1.28998	0.00241255	up
APPBP2	3.39077e-13	1.23	8.46064e-09	up
ARL6IP5	8.46729e-07	1.29692	0.0211276	up
ARRDC3	7.2995e-17	1.82228	1.82137e-12	up
ATP11C	2.99058e-07	1.68998	0.00746209	up
BICC1	2.66168e-08	2.26305	0.000664144	up
BRDT	3.36467e-11	2.21098	8.39551e-07	up
BZW1	1.90307e-06	1.61153	0.0474855	up
C11H12orf76	4.52516e-14	1.86952	1.12912e-09	up
C13H2orf68	1.07937e-12	1.48916	2.69324e-08	up
C5H4orf33	1.54294e-11	1.57913	3.84995e-07	up
C6H5orf63	5.75719e-08	1.2283	0.00143653	up
C7H14orf178	4.63255e-07	1.23746	0.0115591	up
CALM1	1.52572e-06	1.08	0.0380697	up
CAMSAP1	3.2837e-07	1.72094	0.00819348	up
CARMIL1	6.75023e-08	2.03143	0.00168432	up
CASC4	1.47347e-08	1.68417	0.000367659	up
CBLL1	1.11227e-07	1.4431	0.00277534	up
CCDC66	1.21393e-09	1.27678	3.02899e-05	up
CCNB1	6.0915e-17	1.83056	1.51995e-12	up
CCNI	7.57705e-09	1.50984	0.000189063	up
CD177	1.46658e-07	1.16067	0.00365941	up
CDC14B	1.74619e-09	1.32156	4.35708e-05	up
CDC26	1.15318e-09	1.34516	2.87741e-05	up
CELF1	6.42491e-10	2.23634	1.60314e-05	up
CENPA	1.29429e-06	1.17616	0.032295	up
CENPK	4.52935e-10	1.25035	1.13016e-05	up
CENPN	7.81708e-11	1.85806	1.95052e-06	up
CEP295	1.99733e-06	1.00193	0.0498373	up
CHIC1	1.21748e-07	1.4749	0.00303785	up
CNN3	3.96099e-09	1.3837	9.88347e-05	up
COMMD10	1.0809e-07	1.21949	0.00269706	up
CRYAB	1.06314e-11	1.02171	2.65274e-07	up
DCBLD2	1.5341e-09	1.11859	3.82788e-05	up
DCTN6	1.31313e-07	1.97482	0.00327653	up
DCUN1D4	7.27649e-12	2.12523	1.81563e-07	up
DNAJB1	6.41883e-14	1.06578	1.60163e-09	up
DNAJC28	2.53681e-07	1.07313	0.00632986	up
EIF1	2.46866e-10	1.26108	6.15981e-06	up
EIF2A	1.08985e-07	1.16941	0.00271938	up
ELF5	2.64761e-11	1.52095	6.60631e-07	up
EMILIN2	1.08251e-08	1.37355	0.000270108	up
ERBIN	2.98685e-07	1.67389	0.00745279	up
EXOSC9	6.62772e-09	1.07512	0.000165375	up
FAM199X	6.53394e-14	1.87297	1.63035e-09	up
FBLN7	1.12426e-06	1.07136	0.0280525	up
FBXW7	3.18537e-07	1.68128	0.00794814	up
FGFR1OP	1.50648e-06	1.11748	0.0375898	up
FKBP5	1.63693e-09	2.25434	4.08447e-05	up
FMR1	3.79449e-09	1.89517	9.46802e-05	up
FNDC3A	2.11988e-11	1.1442	5.28952e-07	up
GALP	4.31962e-11	1.84311	1.07783e-06	up
GMFB	2.78294e-07	1.46497	0.00694398	up
GNAI1	9.99155e-09	1.15402	0.000249309	up
GSTA3	1.17248e-13	3.35581	2.92557e-09	up
GSTCD	2.57741e-10	2.13631	6.43116e-06	up
HIGD1A	3.19057e-07	1.16039	0.00796111	up
HILPDA	1.45713e-08	1.04963	0.000363583	up
HMGN2	6.28114e-07	2.2968	0.0156727	up
HMGN5	1.99267e-14	1.3889	4.97211e-10	up
HNRNPH1	8.285e-12	2.43077	2.06727e-07	up
HSD11B1	3.07013e-15	1.07216	7.66059e-11	up
HSF2BP	2.53211e-07	1.4182	0.00631811	up
IFI27	9.3796e-09	4.37814	0.00023404	up
IFI27L2	2.73827e-07	1.86811	0.00683254	up
IFRD1	1.11148e-08	1.62704	0.000277335	up
ILDR2	3.29332e-10	1.70471	8.21749e-06	up
IRF2	3.86812e-07	1.36304	0.00965173	up
IRF2BP2	3.02877e-09	1.43081	7.55739e-05	up
KBTBD4	7.40707e-09	1.10533	0.000184821	up
KIF18A	3.79334e-09	1.21014	9.46513e-05	up
KIF27	4.11458e-08	1.12294	0.00102667	up
KLHDC10	2.66129e-07	1.22614	0.00664044	up
KNSTRN	5.58584e-13	1.21198	1.39378e-08	up
KRR1	4.1032e-09	1.54892	0.000102383	up
KRT222	4.95931e-08	2.05061	0.00123745	up
LEPROT	2.60731e-10	1.10091	6.50575e-06	up
LOC100429607	1.31827e-07	1.36792	0.00328934	up
LOC100430578	7.60527e-12	2.33001	1.89767e-07	up
LOC106993083	1.85446e-13	1.02147	4.62724e-09	up
LOC106994418	8.16406e-07	1.19172	0.020371	up
LOC106995726	8.19694e-09	1.28869	0.00020453	up
LOC106995967	9.06335e-15	2.07067	2.26149e-10	up
LOC106996977	6.07425e-08	2.26092	0.00151565	up
LOC106998568	5.82924e-07	1.52481	0.0145451	up
LOC106998938	2.5866e-34	1.87076	6.45407e-30	up
LOC109910387	9.14131e-07	2.38136	0.0228094	up
LOC114670021	9.45185e-07	1.4407	0.0235843	up
LOC114670792	5.25054e-08	1.18102	0.00131011	up
LOC114670860	6.33251e-14	2.30274	1.58009e-09	up
LOC114670878	4.99936e-11	2.35911	1.24744e-06	up
LOC114670905	2.02559e-12	1.42041	5.05425e-08	up
LOC114672259	6.30438e-10	1.19612	1.57307e-05	up
LOC114673836	4.14863e-07	1.00368	0.0103517	up
LOC114675313	8.98408e-07	1.40178	0.0224171	up
LOC114677626	8.77963e-10	1.18189	2.19069e-05	up
LOC114680203	2.33172e-15	1.33044	5.81811e-11	up
LOC693893	1.95586e-07	1.4635	0.00488026	up
LOC694062	1.8455e-09	2.07512	4.6049e-05	up
LOC695839	3.96173e-15	1.11369	9.88531e-11	up
LOC697564	1.47916e-10	1.78208	3.69079e-06	up
LOC699756	8.0798e-12	1.41753	2.01607e-07	up
LOC699779	5.06825e-20	2.18769	1.26463e-15	up
LOC702389	3.53574e-11	2.04405	8.82239e-07	up
LOC704104	5.77561e-13	2.0926	1.44113e-08	up
LOC706355	1.18559e-08	1.83285	0.000295828	up
LOC707684	1.57051e-09	1.17163	3.91874e-05	up
LOC709671	8.9604e-13	1.5184	2.2358e-08	up
LOC710961	4.45132e-10	1.38252	1.11069e-05	up
LOC711421	6.53814e-07	1.82662	0.016314	up
LOC713861	1.28286e-11	1.1693	3.201e-07	up
LOC718407	1.21327e-09	1.31549	3.02735e-05	up
LXN	1.13733e-07	2.60043	0.00283788	up
MAGED2	4.48413e-08	1.67211	0.00111888	up
MARCKS	9.65556e-14	3.66978	2.40925e-09	up
MAT2B	6.27682e-07	2.61577	0.0156619	up
MCCC2	2.15221e-08	2.06257	0.000537019	up
METTL21A	2.03036e-09	1.2606	5.06615e-05	up
MFSD14B	1.45913e-06	1.41272	0.0364083	up
MLF1	2.48968e-10	1.11227	6.21225e-06	up
MRPS14	1.15999e-08	1.13839	0.000289442	up
MRTO4	3.98221e-08	1.75595	0.000993641	up
MTR	2.64483e-08	1.53684	0.000659937	up
NDRG3	6.51935e-07	1.56284	0.0162671	up
NEIL3	1.2148e-07	1.89483	0.00303116	up
NEMF	3.44585e-10	1.014	8.59809e-06	up
NHSL1	4.10746e-11	1.44173	1.02489e-06	up
NPM1	3.74444e-13	1.31592	9.34311e-09	up
NRAS	1.74115e-08	2.13063	0.000434452	up
OTUD3	8.52936e-12	2.56174	2.12825e-07	up
PARD6B	1.41748e-09	2.17676	3.53689e-05	up
PARL	4.3685e-13	1.3006	1.09003e-08	up
PCID2	4.32942e-09	1.57038	0.000108028	up
PCNP	2.47294e-07	1.22374	0.00617048	up
PDCL	8.12844e-07	1.41432	0.0202821	up
PDK1	1.35091e-11	2.85945	3.3708e-07	up
PDS5B	1.94375e-09	1.30647	4.85005e-05	up
PEX2	4.99081e-07	1.77463	0.0124531	up
PHACTR2	7.14557e-23	2.33939	1.78296e-18	up
PHLPP1	1.66648e-10	1.3326	4.15821e-06	up
PLEKHA3	6.14352e-10	2.30522	1.53293e-05	up
PLP1	6.43934e-12	2.86399	1.60674e-07	up
PPP1CB	1.92818e-09	2.66544	4.8112e-05	up
PPP3CA	1.05048e-15	1.7084	2.62115e-11	up
PROSER1	1.06214e-08	1.1844	0.000265024	up
PSMB4	5.94945e-08	1.46401	0.00148451	up
PXDC1	1.28738e-12	1.47908	3.21228e-08	up
QSOX2	1.33295e-10	1.82462	3.32598e-06	up
RAD9B	1.45665e-06	1.13566	0.0363463	up
RAP1GDS1	1.77461e-07	1.4165	0.004428	up
RAPGEF2	1.88042e-09	1.53004	4.69202e-05	up
RBBP7	5.35415e-13	1.22467	1.33597e-08	up
RC3H1	4.78153e-12	2.55741	1.19309e-07	up
RIOK1	2.23514e-09	1.19587	5.57712e-05	up
RMI1	2.32673e-08	1.99762	0.000580566	up
RUNX2	8.21797e-20	2.19694	2.05055e-15	up
SDC1	6.91214e-13	1.00825	1.72472e-08	up
SDCBP	1.00568e-06	1.15323	0.0250938	up
SERINC5	2.22137e-09	1.3286	5.54277e-05	up
SET	3.67849e-10	2.69895	9.17856e-06	up
SFPQ	4.04231e-09	1.6011	0.000100864	up
SGK1	1.24898e-06	1.6701	0.0311645	up
SH2D4A	1.26346e-11	2.06279	3.15259e-07	up
SH3BGRL2	7.29782e-09	1.92794	0.000182095	up
SH3KBP1	1.3833e-06	1.41637	0.0345162	up
SINHCAF	3.48167e-07	1.6923	0.00868746	up
SLC25A5	2.66443e-10	1.76967	6.64829e-06	up
SLC26A2	5.12965e-17	1.10359	1.27995e-12	up
SLC38A6	9.11149e-08	1.10034	0.0022735	up
SLK	6.79107e-07	1.03364	0.0169451	up
SMARCA1	3.72972e-09	1.03308	9.30641e-05	up
SNX30	1.7924e-06	1.05213	0.044724	up
SOX4	2.89861e-12	1.91112	7.23261e-08	up
SPARCL1	2.66548e-10	1.42847	6.65092e-06	up
SPCS2	9.94562e-11	1.24933	2.48163e-06	up
SPTBN1	5.02679e-07	1.26319	0.0125429	up
STARD7	4.25881e-09	2.2814	0.000106266	up
STOM	2.36507e-12	2.01742	5.90132e-08	up
STRIP2	3.13954e-10	1.59312	7.83379e-06	up
TAOK1	6.74546e-07	1.26242	0.0168313	up
TBPL1	4.06614e-09	1.09503	0.000101458	up
TFAP2D	1.29912e-06	1.14018	0.0324158	up
TIMM21	4.52228e-08	1.30607	0.0011284	up
TIMP1	9.11383e-09	3.65717	0.000227408	up
TM2D1	1.34291e-07	1.0462	0.00335084	up
TMEM218	1.69834e-06	1.19631	0.0423769	up
TMEM59	1.17116e-07	1.11501	0.00292228	up
TMTC3	3.48302e-11	1.0122	8.69084e-07	up
TOP2A	8.98057e-07	1.09498	0.0224083	up
TP53	3.87557e-09	1.17371	9.67031e-05	up
TRAPPC2	3.95694e-08	1.25866	0.000987336	up
TRIP11	7.55536e-12	2.34354	1.88521e-07	up
UBA6	2.46179e-09	1.32288	6.14267e-05	up
VCAN	1.29034e-06	1.24651	0.0321966	up
WNK3	1.6206e-10	1.41904	4.04373e-06	up
XKR9	5.81068e-07	1.06239	0.0144988	up
YPEL5	3.22933e-16	1.64603	8.05782e-12	up
YWHAG	4.26852e-07	1.14652	0.0106508	up
ZNF260	3.04196e-10	1.22232	7.59031e-06	up
ZNF286A	1.98176e-08	1.5125	0.000494489	up
AAAS	4.06344e-10	-1.84678	1.01391e-05	down
AAR2	7.6718e-10	-1.82152	1.91427e-05	down
AARS	2.89859e-16	-2.58494	7.23256e-12	down
ABCB4	2.46971e-07	-1.35567	0.00616242	down
ABCC1	1.1421e-09	-1.47647	2.84978e-05	down
ABCF3	1.31748e-09	-1.72081	3.28738e-05	down
ABHD12	1.59337e-09	-1.43661	3.97579e-05	down
ABI2	7.46095e-08	-1.00845	0.00186166	down
ACAA1	7.44948e-12	-1.92187	1.85879e-07	down
ACAD9	1.34452e-06	-1.15841	0.0335484	down
ACADS	5.57689e-10	-1.20138	1.39154e-05	down
ACAP2	1.37479e-06	-1.06924	0.0343037	down
ACBD6	4.93446e-11	-1.54421	1.23125e-06	down
ACO2	2.78695e-10	-1.76337	6.954e-06	down
ACOT8	1.01108e-08	-1.41093	0.000252284	down
ACOT9	1.72214e-08	-1.64779	0.000429708	down
ACP5	2.83641e-07	-1.67281	0.0070774	down
ACSM1	6.12037e-09	-1.03147	0.000152715	down
ACTG1	1.21353e-09	-2.03982	3.02799e-05	down
ACTL8	8.15026e-08	-1.60562	0.00203365	down
ACTR1A	1.03129e-09	-1.25979	2.57327e-05	down
ADA	9.55902e-07	-1.48911	0.0238517	down
ADAD2	2.54567e-13	-2.51941	6.35195e-09	down
ADAMTSL2	8.48356e-16	-2.23572	2.11682e-11	down
ADAP1	1.14026e-09	-1.56963	2.84518e-05	down
ADCK1	2.1129e-07	-1.17138	0.00527211	down
ADCY3	9.65355e-11	-1.61054	2.40875e-06	down
ADGRG1	7.18128e-08	-1.54543	0.00179187	down
ADI1	1.79208e-06	-1.32481	0.0447161	down
ADSL	5.48079e-08	-1.58981	0.00136757	down
AGFG2	3.70854e-12	-1.70436	9.25354e-08	down
AGPAT2	1.50814e-07	-1.59477	0.00376312	down
AGTRAP	1.20203e-11	-2.21328	2.99931e-07	down
AHCY	4.40175e-13	-2.44823	1.09832e-08	down
AIFM1	1.12927e-09	-1.56976	2.81774e-05	down
AIFM2	2.55166e-11	-1.72783	6.3669e-07	down
AIP	4.46228e-08	-1.2346	0.00111343	down
AK2	1.86596e-09	-1.3415	4.65596e-05	down
AKAP8L	2.37378e-07	-1.27998	0.00592306	down
AKNA	9.13983e-16	-1.14217	2.28057e-11	down
AKR7A2	1.77439e-08	-1.73399	0.000442746	down
AKT2	1.1886e-11	-1.59977	2.96579e-07	down
ALDH2	5.00627e-17	-2.4654	1.24916e-12	down
ALG12	7.91549e-09	-1.49923	0.000197507	down
ALKBH3	1.14054e-11	-1.96999	2.84587e-07	down
ALKBH7	1.04793e-07	-1.08882	0.0026148	down
AMBRA1	1.18397e-09	-1.45124	2.95425e-05	down
AMZ1	4.33469e-11	-1.57226	1.08159e-06	down
ANAPC13	1.07983e-07	-1.23239	0.00269438	down
ANAPC2	5.74032e-07	-1.07354	0.0143233	down
ANAPC7	7.97198e-10	-1.68403	1.98917e-05	down
ANKRD6	1.07005e-09	-1.1366	2.66999e-05	down
ANXA9	4.65923e-12	-1.26101	1.16257e-07	down
AP1M1	8.60694e-11	-1.05473	2.1476e-06	down
AP2A2	1.2589e-09	-1.10181	3.1412e-05	down
AP2S1	3.33604e-09	-1.61886	8.32409e-05	down
APBA2	1.03748e-09	-1.38895	2.58872e-05	down
APBA3	6.04608e-10	-1.31787	1.50862e-05	down
APLP2	2.32567e-07	-1.30456	0.00580301	down
APOC4	2.82131e-08	-1.52884	0.000703974	down
APOOL	1.711e-06	-1.28453	0.042693	down
AQP3	1.1208e-07	-1.94034	0.00279662	down
ARAP1	2.89124e-13	-1.05467	7.21421e-09	down
ARFGAP2	6.82689e-09	-1.55511	0.000170345	down
ARFIP2	7.04928e-07	-1.25463	0.0175894	down
ARG2	1.68398e-09	-2.24627	4.20187e-05	down
ARHGAP10	7.15848e-11	-1.37323	1.78618e-06	down
ARHGDIA	1.19894e-06	-1.10424	0.0299159	down
ARHGDIG	3.25179e-10	-1.69839	8.11386e-06	down
ARHGEF3	1.80578e-10	-1.51466	4.50579e-06	down
ARID3B	1.5496e-10	-1.02125	3.86655e-06	down
ARID5A	8.39835e-10	-1.98541	2.09556e-05	down
ARMC7	5.99681e-11	-1.25252	1.49632e-06	down
ARRDC1	1.03443e-08	-2.2103	0.000258112	down
ASB6	9.45085e-14	-1.40318	2.35818e-09	down
ASNS	2.61867e-13	-1.87524	6.53412e-09	down
ASTL	7.289e-11	-2.59788	1.81875e-06	down
ATF6	3.51152e-07	-1.29334	0.00876195	down
ATG101	1.76595e-07	-1.71269	0.00440639	down
ATG16L1	1.2546e-09	-1.14662	3.13048e-05	down
ATG4B	7.02159e-11	-1.61173	1.75203e-06	down
ATG5	1.25964e-07	-1.27825	0.00314305	down
ATG7	4.33555e-14	-2.28036	1.08181e-09	down
ATL3	3.24193e-11	-1.24424	8.08927e-07	down
ATP13A5	4.1948e-11	-1.60416	1.04669e-06	down
ATP5F1A	9.16427e-09	-1.73894	0.000228667	down
ATP5F1B	1.16215e-08	-1.42436	0.000289979	down
ATP5IF1	2.45399e-10	-2.24027	6.12321e-06	down
ATP6V0C	6.43638e-14	-2.36208	1.60601e-09	down
ATP6V1C2	8.33233e-09	-1.59804	0.000207908	down
ATP6V1D	1.28973e-11	-2.06804	3.21814e-07	down
ATP6V1E1	1.67046e-19	-2.87493	4.16814e-15	down
ATPSCKMT	3.06725e-07	-1.08131	0.00765341	down
ATXN10	1.25116e-07	-1.01567	0.00312191	down
AVEN	1.1637e-13	-2.88315	2.90366e-09	down
AVL9	7.1745e-11	-1.66822	1.79018e-06	down
AVPI1	2.47731e-11	-2.05839	6.18138e-07	down
BABAM1	6.20321e-09	-1.41647	0.000154782	down
BAG6	4.30431e-10	-1.37608	1.07401e-05	down
BAIAP2	1.38207e-08	-1.49306	0.000344853	down
BAIAP2L1	1.44592e-10	-1.4779	3.60787e-06	down
BCAP31	1.15443e-11	-1.75177	2.88053e-07	down
BCAS3	6.80399e-07	-1.00035	0.0169773	down
BCAS4	1.43259e-09	-1.56119	3.57461e-05	down
BCAT2	1.06309e-07	-1.30184	0.00265261	down
BCL6B	1.26071e-07	-1.204	0.00314573	down
BCS1L	6.1559e-08	-1.57836	0.00153602	down
BDNF	1.30786e-06	-1.29898	0.0326336	down
BIN1	1.80887e-08	-1.10138	0.00045135	down
BLOC1S3	1.23798e-10	-1.03149	3.08901e-06	down
BLVRA	3.5244e-10	-1.64786	8.79408e-06	down
BMP6	4.36666e-12	-1.49142	1.08957e-07	down
BNIP2	1.50667e-08	-1.11007	0.000375944	down
BOK	3.26137e-07	-1.53439	0.00813778	down
BOLA1	6.84061e-09	-1.94412	0.000170687	down
BORCS5	5.45819e-15	-2.44942	1.36193e-10	down
BORCS7	5.79625e-07	-1.06194	0.0144628	down
BRD8	5.35484e-10	-1.29592	1.33614e-05	down
BRD9	7.66207e-10	-1.21589	1.91184e-05	down
BRF2	3.43915e-08	-1.18376	0.000858138	down
BRMS1	7.24009e-18	-3.03327	1.80655e-13	down
BSDC1	2.65349e-13	-1.83019	6.62098e-09	down
BTBD18	1.89555e-08	-1.01742	0.000472977	down
BUD23	3.72003e-07	-1.27666	0.00928223	down
BYSL	2.51965e-10	-1.20857	6.28702e-06	down
C11H12orf10	1.43411e-07	-1.42907	0.00357839	down
C11H12orf43	3.66598e-07	-1.19794	0.00914735	down
C11H12orf73	2.11583e-09	-1.96218	5.27942e-05	down
C14H11orf24	4.64764e-13	-1.75019	1.15968e-08	down
C15H9orf135	4.68448e-07	-1.37735	0.0116887	down
C16H17orf53	1.0659e-11	-1.51734	2.65963e-07	down
C16H17orf62	1.37884e-08	-1.27922	0.000344049	down
C19H19orf24	1.04745e-06	-1.56666	0.0261359	down
C19H19orf25	1.6073e-10	-1.42885	4.01054e-06	down
C19H19orf38	2.22795e-14	-2.11818	5.55919e-10	down
C19H19orf53	1.08975e-08	-1.94583	0.000271914	down
C1H1orf112	2.63823e-10	-1.48369	6.5829e-06	down
C1H1orf146	1.93981e-10	-2.35508	4.84022e-06	down
C1H1orf174	1.40345e-07	-1.29767	0.00350188	down
C1QBP	4.84399e-07	-1.76006	0.0120867	down
C20H16orf70	5.36338e-08	-1.26042	0.00133827	down
C2CD6	1.69569e-07	-1.02175	0.00423109	down
C3H7orf25	7.77022e-08	-1.48958	0.00193883	down
C3H7orf50	3.21433e-07	-2.04815	0.00802041	down
C4H6orf52	7.97896e-12	-2.8607	1.99091e-07	down
C4H6orf89	6.79698e-10	-1.41044	1.69598e-05	down
C6H5orf49	5.61002e-13	-2.0675	1.39981e-08	down
C7H15orf39	1.03107e-08	-1.40666	0.000257274	down
CABYR	3.34678e-12	-1.89214	8.35088e-08	down
CALCOCO1	1.34606e-07	-1.2912	0.00335869	down
CALCOCO2	1.87693e-06	-1.23068	0.0468331	down
CALR	1.26534e-13	-2.61459	3.15727e-09	down
CAPZB	1.01824e-09	-1.37723	2.5407e-05	down
CARHSP1	1.24034e-09	-1.61623	3.09489e-05	down
CARM1	2.4807e-11	-1.32487	6.18984e-07	down
CBLN2	1.03167e-13	-1.66504	2.57422e-09	down
CBX8	1.44722e-13	-1.08297	3.61111e-09	down
CCAR2	7.98522e-13	-1.20198	1.99247e-08	down
CCDC107	5.35464e-07	-1.66996	0.0133609	down
CCDC113	6.48351e-09	-1.2952	0.000161776	down
CCDC12	6.27144e-15	-1.80796	1.56485e-10	down
CCDC124	9.40291e-08	-1.32553	0.00234621	down
CCDC127	2.01977e-10	-1.8104	5.03974e-06	down
CCDC130	1.00222e-13	-2.2849	2.50073e-09	down
CCDC167	6.14148e-07	-2.44012	0.0153242	down
CCDC22	6.54955e-09	-1.04363	0.000163424	down
CCDC24	1.48825e-10	-1.57594	3.71348e-06	down
CCDC69	2.45443e-12	-1.39339	6.1243e-08	down
CCDC86	7.87384e-07	-1.26831	0.0196468	down
CCM2	3.72102e-13	-1.42227	9.2847e-09	down
CCNB2	8.1152e-09	-1.2539	0.00020249	down
CCNF	8.36046e-12	-1.08635	2.0861e-07	down
CCNH	1.43402e-07	-1.29877	0.00357817	down
CCNI2	1.78258e-10	-1.5271	4.44791e-06	down
CCNJ	4.65855e-07	-1.61046	0.011624	down
CCT5	2.08218e-15	-1.97343	5.19546e-11	down
CD82	4.04165e-09	-1.21114	0.000100847	down
CDC25B	2.20793e-09	-1.20213	5.50922e-05	down
CDC34	8.89301e-08	-1.07912	0.00221898	down
CDC37	1.64127e-08	-1.40472	0.00040953	down
CDC42EP2	6.68628e-11	-1.76378	1.66836e-06	down
CDC6	1.31654e-08	-1.07441	0.000328504	down
CDCA5	1.10692e-11	-1.80615	2.76199e-07	down
CDCA7L	3.15762e-09	-1.87162	7.87889e-05	down
CDIPT	1.09148e-10	-1.15988	2.72346e-06	down
CDKN2D	1.18753e-07	-1.61838	0.00296312	down
CDKN3	3.16156e-07	-1.28651	0.00788872	down
CDT1	6.67391e-08	-1.20953	0.00166527	down
CDX2	1.97993e-11	-1.63022	4.94032e-07	down
CENPT	4.26149e-07	-1.18171	0.0106333	down
CENPX	3.7978e-07	-1.50665	0.00947627	down
CEP68	3.89563e-12	-1.47109	9.72038e-08	down
CFL1	9.72323e-08	-1.57211	0.00242614	down
CFL2	6.3953e-08	-1.38256	0.00159576	down
CGRRF1	4.29604e-11	-1.52944	1.07195e-06	down
CHAF1A	6.92503e-13	-1.56898	1.72793e-08	down
CHFR	1.35301e-06	-1.11622	0.0337604	down
CHIC2	1.5265e-09	-1.65066	3.80891e-05	down
CHST9	8.02228e-12	-1.17504	2.00172e-07	down
CHTOP	3.79438e-08	-1.58712	0.000946774	down
CIDEC	5.23586e-16	-3.81215	1.30645e-11	down
CKB	4.35517e-13	-2.76752	1.0867e-08	down
CKS2	7.88294e-09	-1.71312	0.000196695	down
CLN8	4.77244e-07	-1.15166	0.0119082	down
CLPP	3.31975e-08	-1.51302	0.000828343	down
CLTA	9.31965e-08	-1.6813	0.00232544	down
CMC2	1.38104e-09	-1.22534	3.44598e-05	down
CMC4	7.86439e-09	-1.97691	0.000196232	down
CNN2	3.49336e-11	-1.3503	8.71662e-07	down
CNOT3	9.40869e-09	-1.21469	0.000234766	down
CNPPD1	1.72557e-08	-1.3366	0.000430564	down
CNTN6	8.66251e-11	-1.19229	2.16147e-06	down
COA1	8.10209e-08	-1.87918	0.00202163	down
COASY	1.17436e-12	-1.57789	2.93027e-08	down
COL28A1	9.5861e-09	-1.59017	0.000239192	down
COLEC11	3.49919e-16	-1.39038	8.73117e-12	down
COMMD1	1.84452e-06	-2.07325	0.0460244	down
COMMD8	1.00157e-07	-1.92216	0.00249912	down
COPE	3.21978e-07	-1.56536	0.00803399	down
COPS5	1.35806e-07	-1.8054	0.00338863	down
COPS7A	9.75409e-08	-1.02024	0.00243384	down
COPS7B	3.17247e-07	-1.19571	0.00791595	down
COQ2	3.02052e-07	-1.34576	0.00753679	down
COQ4	9.4254e-15	-1.95857	2.35183e-10	down
COQ7	1.76941e-11	-1.12865	4.41503e-07	down
CORO1C	1.86038e-11	-1.60379	4.64201e-07	down
COX14	2.40548e-12	-2.70286	6.00215e-08	down
COX17	3.14061e-10	-2.1089	7.83645e-06	down
COX7B	7.09787e-11	-1.82792	1.77106e-06	down
CPNE4	3.53966e-07	-1.03796	0.00883215	down
CPSF1	3.18665e-11	-1.25695	7.95132e-07	down
CPSF4L	1.72886e-10	-1.33113	4.31386e-06	down
CRKL	9.33864e-10	-1.71522	2.33018e-05	down
CSDC2	6.19339e-09	-1.3385	0.000154537	down
CSNK1E	3.07582e-08	-1.07779	0.000767479	down
CSNK1G2	6.81644e-09	-1.35173	0.000170084	down
CSRP1	8.3625e-16	-3.49098	2.08661e-11	down
CSTB	7.21765e-16	-3.16466	1.80095e-11	down
CTNNBL1	1.57137e-07	-1.57849	0.00392088	down
CTRB2	1.43925e-08	-1.69014	0.000359121	down
CXHXorf40A	4.32131e-07	-1.24726	0.0107825	down
CXHXorf40B	3.9555e-07	-1.38382	0.00986975	down
CYP2R1	7.91876e-07	-1.61739	0.0197589	down
CYREN	2.69687e-07	-1.53552	0.00672923	down
CYTH2	3.3886e-10	-2.06036	8.45524e-06	down
CYTL1	5.47324e-08	-1.88543	0.00136568	down
CZIB	4.29262e-07	-1.2019	0.0107109	down
DAB2IP	2.06751e-10	-1.18282	5.15885e-06	down
DAGLB	1.30987e-07	-1.43187	0.00326839	down
DAP3	2.17964e-10	-1.61282	5.43864e-06	down
DAPK3	2.75615e-08	-1.10467	0.000687715	down
DBF4B	9.74355e-07	-1.32967	0.0243121	down
DCAF11	9.08071e-11	-1.24162	2.26582e-06	down
DCAF4	6.15608e-12	-1.11613	1.53607e-07	down
DCPS	2.94988e-11	-1.23048	7.36054e-07	down
DCTN1	4.32015e-08	-1.67268	0.00107796	down
DCTN2	4.00408e-11	-1.98635	9.99097e-07	down
DCTN5	1.08758e-09	-1.34965	2.71372e-05	down
DCUN1D3	7.12654e-08	-1.10431	0.00177821	down
DDB1	6.82239e-08	-1.05364	0.00170232	down
DDB2	5.90686e-12	-1.60774	1.47388e-07	down
DDRGK1	2.06249e-09	-1.57929	5.14633e-05	down
DDX11	2.63215e-12	-1.63123	6.56775e-08	down
DDX24	2.72515e-12	-1.59091	6.79979e-08	down
DDX39B	9.71084e-07	-1.34104	0.0242305	down
DDX49	6.70031e-08	-1.40838	0.00167186	down
DDX5	5.22936e-08	-1.89446	0.00130483	down
DDX60L	1.13149e-07	-1.34143	0.00282329	down
DEDD2	4.01081e-15	-2.18594	1.00078e-10	down
DELE1	3.96381e-10	-1.41965	9.8905e-06	down
DGCR2	7.55512e-12	-1.66922	1.88515e-07	down
DHFR	7.71297e-11	-1.19953	1.92454e-06	down
DHX34	3.25949e-09	-1.35515	8.13308e-05	down
DHX40	9.34099e-07	-1.10474	0.0233076	down
DHX58	5.3148e-15	-1.75875	1.32615e-10	down
DMAC2	4.58476e-08	-1.21605	0.00114399	down
DMAP1	3.72623e-09	-1.78249	9.29769e-05	down
DMRT2	4.91464e-11	-1.1854	1.2263e-06	down
DNAH17	5.41323e-10	-1.06003	1.35071e-05	down
DNAJA2	1.3232e-10	-1.915	3.30165e-06	down
DNAJA3	4.63711e-10	-1.34858	1.15705e-05	down
DNAJA4	4.5058e-09	-1.38723	0.000112429	down
DNAJB11	6.2185e-09	-1.48781	0.000155164	down
DNAJB6	6.39731e-08	-1.01968	0.00159626	down
DNAJC11	6.57217e-08	-1.31175	0.00163989	down
DNAJC14	2.3123e-10	-1.19769	5.76965e-06	down
DNAJC4	2.90505e-08	-1.39114	0.000724868	down
DNTTIP1	4.37745e-11	-1.88062	1.09226e-06	down
DOLK	1.76968e-07	-1.28674	0.00441571	down
DOLPP1	1.5079e-07	-1.28655	0.00376252	down
DOP1B	4.86502e-09	-1.03789	0.000121392	down
DPCD	7.0366e-10	-2.5203	1.75577e-05	down
DPP6	2.98327e-08	-1.10636	0.000744386	down
DRG1	3.00503e-13	-1.97251	7.49815e-09	down
DSCAML1	2.89299e-09	-1.03353	7.21859e-05	down
DUSP10	1.15497e-09	-1.77571	2.88188e-05	down
DUSP16	6.97897e-08	-1.20225	0.00174139	down
DUT	1.00179e-08	-1.49818	0.000249967	down
DXO	2.50674e-12	-1.50824	6.25483e-08	down
DYM	4.58393e-08	-1.35219	0.00114378	down
DYNLL1	1.24358e-11	-1.7904	3.10299e-07	down
DYNLRB1	1.12529e-06	-1.48016	0.0280781	down
E4F1	2.16208e-07	-1.33657	0.00539482	down
EARS2	1.57118e-10	-1.46765	3.92041e-06	down
ECSIT	7.06748e-11	-1.83425	1.76348e-06	down
EEF1A1	1.72329e-07	-1.4892	0.00429996	down
EEF2	2.13073e-08	-1.88689	0.000531659	down
EEF2K	1.72984e-09	-1.12592	4.31629e-05	down
EGLN2	3.22806e-10	-1.09912	8.05465e-06	down
EHD1	1.75661e-10	-1.30613	4.3831e-06	down
EI24	8.128e-09	-1.2445	0.00020281	down
EIF1B	1.94326e-10	-1.9142	4.84883e-06	down
EIF3D	3.87694e-07	-1.17277	0.00967373	down
EIF3G	2.24487e-08	-1.34029	0.000560141	down
EIF4A1	5.74239e-11	-1.56121	1.43284e-06	down
EIF4E1B	3.23519e-11	-2.35104	8.07244e-07	down
EIF4E2	1.40985e-08	-1.2955	0.000351785	down
EIF4H	2.20103e-10	-1.54885	5.49201e-06	down
ELAC2	4.48053e-08	-1.37773	0.00111798	down
ELK1	1.83343e-07	-1.26776	0.00457476	down
ELMSAN1	4.33798e-09	-1.32171	0.000108241	down
ELOF1	5.48734e-07	-1.95229	0.013692	down
EMC3	7.28805e-07	-1.58319	0.0181851	down
EMG1	1.03199e-07	-1.06242	0.00257501	down
ENHO	3.03751e-08	-1.39849	0.00075792	down
EPHX1	2.27136e-08	-1.30543	0.00056675	down
ERAL1	1.30505e-07	-1.50807	0.00325636	down
ERCC2	6.33189e-12	-1.83473	1.57993e-07	down
ERF	2.61619e-11	-1.01221	6.52793e-07	down
ESRRB	2.60969e-09	-1.57699	6.51169e-05	down
ESS2	3.2738e-17	-1.90753	8.1688e-13	down
EXO5	9.20329e-16	-2.26383	2.2964e-11	down
EXOC7	4.1439e-12	-1.23893	1.03399e-07	down
EXOSC4	3.33466e-09	-1.95483	8.32063e-05	down
EXTL3	1.52113e-06	-1.35785	0.0379551	down
FAAP100	1.11281e-09	-1.09843	2.77668e-05	down
FABP5	3.31239e-11	-2.45397	8.26507e-07	down
FAM118B	5.51235e-08	-1.33106	0.00137544	down
FAM151B	2.25956e-10	-1.29043	5.63806e-06	down
FAM160A2	7.28105e-07	-1.23423	0.0181677	down
FAM161B	7.20766e-08	-1.35481	0.00179846	down
FAM174A	1.46764e-07	-1.04224	0.00366205	down
FAM216A	3.7381e-08	-1.20442	0.000932731	down
FAM32A	1.47915e-09	-1.82772	3.69079e-05	down
FAM53B	9.96592e-09	-1.15016	0.00024867	down
FAM53C	9.02771e-12	-1.11896	2.2526e-07	down
FAM89B	1.04115e-14	-1.67681	2.59787e-10	down
FAM92B	2.37339e-07	-1.40792	0.00592209	down
FAN1	2.01233e-09	-1.27873	5.02116e-05	down
FAU	9.63866e-07	-1.74392	0.0240504	down
FBH1	6.75975e-08	-1.08374	0.00168669	down
FBL	5.964e-14	-2.0623	1.48814e-09	down
FBXO22	1.05865e-09	-1.45085	2.64153e-05	down
FBXW12	3.86554e-09	-1.94353	9.6453e-05	down
FBXW9	2.87536e-10	-2.00119	7.1746e-06	down
FDX2	9.69332e-13	-1.71146	2.41868e-08	down
FDXR	2.9741e-09	-1.52354	7.42098e-05	down
FER1L6	8.64744e-10	-1.16968	2.15771e-05	down
FH	3.3615e-07	-1.32842	0.00838762	down
FIGLA	4.29745e-08	-2.30023	0.0010723	down
FKBP9	6.94739e-09	-1.60436	0.000173351	down
FKBPL	1.92784e-11	-1.76201	4.81036e-07	down
FN3KRP	4.39405e-07	-1.06042	0.010964	down
FOXI3	4.48195e-07	-1.05516	0.0111834	down
FOXRED1	1.39682e-07	-1.1608	0.00348535	down
FPGS	1.02806e-07	-1.31071	0.00256521	down
FRS3	1.30102e-10	-1.21992	3.2463e-06	down
FSD1	3.03597e-12	-1.12217	7.57536e-08	down
FSTL4	6.15145e-10	-1.02072	1.53491e-05	down
FUS	7.31146e-13	-1.64434	1.82436e-08	down
FZR1	6.93047e-16	-1.55172	1.72929e-11	down
G6PD	1.33195e-08	-1.33503	0.000332347	down
GAB2	5.02505e-07	-1.12422	0.0125385	down
GAD1	6.43454e-10	-1.3331	1.60555e-05	down
GADD45GIP1	2.42628e-07	-1.82173	0.00605405	down
GAK	8.2402e-13	-1.13499	2.0561e-08	down
GAS7	1.17568e-08	-1.08374	0.000293355	down
GAS8	6.20977e-08	-1.6299	0.00154946	down
GCDH	8.95579e-11	-1.6963	2.23465e-06	down
GCHFR	3.44149e-08	-2.78162	0.000858721	down
GCSH	5.89279e-07	-1.48336	0.0147037	down
GDPD4	2.05189e-08	-1.33678	0.000511987	down
GEMIN4	2.21482e-13	-1.27823	5.52643e-09	down
GEMIN8	1.45939e-06	-1.30441	0.0364148	down
GFRA1	1.15118e-07	-1.07071	0.00287242	down
GGT1	3.71712e-09	-1.31012	9.27495e-05	down
GHITM	3.24164e-08	-1.789	0.000808855	down
GLP2R	3.63701e-08	-1.34974	0.000907507	down
GLRX	1.73206e-06	-1.02759	0.0432184	down
GLRX3	1.13749e-06	-1.35109	0.0283827	down
GLYR1	6.88504e-11	-1.35085	1.71796e-06	down
GM2A	4.94277e-09	-1.5084	0.000123332	down
GMEB1	4.17246e-07	-1.24938	0.0104111	down
GMPPB	2.11082e-11	-1.23678	5.26693e-07	down
GMPR	1.51877e-08	-1.97149	0.000378962	down
GMPR2	2.26679e-07	-1.48713	0.00565609	down
GMPS	2.30064e-10	-1.51201	5.74055e-06	down
GNA14	2.00523e-07	-1.37206	0.00500345	down
GNAI3	9.0336e-08	-1.10131	0.00225406	down
GNL1	3.41281e-09	-1.39456	8.51564e-05	down
GNPDA1	7.79792e-07	-1.76013	0.0194574	down
GNS	7.98811e-09	-2.23129	0.000199319	down
GORASP1	6.48138e-10	-1.46682	1.61723e-05	down
GOT2	1.41661e-07	-1.32401	0.00353473	down
GP9	8.12127e-11	-2.2599	2.02642e-06	down
GPAA1	4.2437e-09	-1.47582	0.000105889	down
GPANK1	4.13266e-10	-1.31054	1.03118e-05	down
GPAT2	6.38673e-13	-1.12827	1.59362e-08	down
GPAT4	2.79175e-13	-1.61814	6.96597e-09	down
GPKOW	4.47906e-07	-1.32179	0.0111761	down
GPN1	9.00914e-11	-2.06836	2.24796e-06	down
GPN2	7.23345e-15	-2.46029	1.80489e-10	down
GPN3	8.00267e-08	-1.33356	0.00199683	down
GPR158	1.87043e-18	-1.69367	4.6671e-14	down
GPS1	3.95876e-08	-1.50915	0.00098779	down
GPS2	1.01778e-08	-1.51199	0.000253957	down
GPX1	2.17412e-08	-1.88166	0.000542485	down
GPX4	1.15864e-06	-1.69233	0.0289104	down
GRAMD1A	9.5224e-11	-1.03458	2.37603e-06	down
GRHPR	7.64482e-11	-1.92565	1.90754e-06	down
GRWD1	9.71105e-13	-1.10423	2.4231e-08	down
GSS	2.7773e-10	-1.48431	6.92992e-06	down
GSTZ1	2.07302e-10	-1.13983	5.17259e-06	down
GTF2E2	5.69076e-07	-1.42652	0.0141996	down
GTF2F1	1.5541e-10	-1.40608	3.8778e-06	down
GTF3A	3.91696e-07	-1.2472	0.00977361	down
GTF3C1	6.05695e-08	-1.2803	0.00151133	down
GTF3C5	2.15158e-11	-1.65155	5.36863e-07	down
GTPBP1	1.53404e-08	-1.257	0.000382774	down
GYS1	3.68201e-08	-1.07023	0.000918734	down
H2AFX	5.07222e-12	-1.85332	1.26562e-07	down
H2AFY2	9.67074e-10	-1.46549	2.41304e-05	down
HABP4	2.17568e-09	-1.27374	5.42876e-05	down
HADH	2.65328e-09	-1.4384	6.62046e-05	down
HARS	1.96532e-06	-1.50017	0.0490385	down
HAUS5	4.51456e-16	-1.18916	1.12647e-11	down
HAUS7	6.92551e-08	-1.45537	0.00172805	down
HAUS8	3.27851e-11	-1.82514	8.18053e-07	down
HCFC1R1	2.09721e-12	-1.12726	5.23297e-08	down
HDHD3	1.03155e-12	-2.2544	2.57392e-08	down
HDLBP	3.58268e-12	-1.81395	8.93949e-08	down
HEXIM2	2.00076e-07	-1.34306	0.0049923	down
HHLA2	1.57597e-09	-1.60218	3.93236e-05	down
HIC2	5.30335e-15	-1.07984	1.32329e-10	down
HIP1R	3.48583e-16	-2.24613	8.69784e-12	down
HIPK4	3.07786e-14	-2.29607	7.67987e-10	down
HMGCS1	2.93714e-07	-1.14838	0.00732875	down
HNRNPA2B1	1.43435e-08	-1.45717	0.000357898	down
HNRNPDL	2.11788e-07	-1.03292	0.00528454	down
HNRNPK	1.70619e-06	-1.25867	0.0425728	down
HSD11B1L	3.31539e-14	-2.128	8.27255e-10	down
HSF1	1.64823e-11	-1.25963	4.11267e-07	down
HSP90AA1	5.74213e-07	-1.223	0.0143278	down
HSPA8	1.5588e-08	-2.28426	0.000388952	down
ICAM1	1.4038e-07	-1.62118	0.00350276	down
ICMT	2.06906e-09	-1.39124	5.16271e-05	down
IDH2	4.08715e-12	-2.29286	1.01982e-07	down
IDH3G	3.15802e-10	-1.80334	7.87989e-06	down
IER2	2.69049e-10	-2.07946	6.71331e-06	down
IFT22	3.76877e-07	-1.27387	0.00940384	down
IGBP1	7.54411e-11	-1.67941	1.88241e-06	down
IGFALS	4.77349e-14	-2.58282	1.19108e-09	down
IL1R2	1.10277e-08	-1.42871	0.000275163	down
IL34	4.49199e-15	-2.67773	1.12084e-10	down
ILRUN	2.34586e-08	-1.00813	0.000585339	down
INCENP	1.73893e-13	-2.18775	4.33898e-09	down
IPPK	5.48573e-11	-1.7941	1.3688e-06	down
IRF1	2.20742e-10	-1.37403	5.50796e-06	down
IST1	2.71841e-10	-1.12141	6.78297e-06	down
ITGB1BP1	8.04733e-07	-1.24792	0.0200797	down
IZUMO1R	8.30246e-09	-1.69035	0.000207163	down
JMJD7	2.76058e-14	-1.74814	6.8882e-10	down
JPT1	2.83823e-09	-1.69161	7.08196e-05	down
KARS	4.24918e-13	-2.28699	1.06025e-08	down
KCNH3	1.55398e-10	-1.13351	3.8775e-06	down
KCNK16	7.79528e-15	-2.28215	1.94508e-10	down
KCNT1	5.52971e-11	-1.00772	1.37977e-06	down
KDM4A	5.09479e-07	-1.47041	0.0127125	down
KHDC3L	2.50068e-08	-1.87925	0.00062397	down
KIAA0513	6.33619e-14	-1.48508	1.58101e-09	down
KIAA0895L	1.55023e-08	-1.24086	0.000386815	down
KIAA0930	3.06104e-09	-1.462	7.6379e-05	down
KIAA1143	3.72374e-08	-1.2086	0.000929147	down
KIAA1191	1.82613e-09	-2.19768	4.55657e-05	down
KIF22	2.17557e-07	-1.19369	0.00542848	down
KIF2C	3.30314e-08	-1.52006	0.000824201	down
KIFC1	2.14036e-07	-1.20819	0.00534064	down
KLHDC4	4.76013e-07	-1.3668	0.0118775	down
KLHDC9	1.34083e-08	-1.5171	0.000334564	down
KYAT3	9.3988e-15	-1.28034	2.34519e-10	down
LAD1	1.84478e-11	-1.99141	4.60309e-07	down
LAMTOR1	3.9806e-08	-1.49727	0.00099324	down
LANCL1	2.13985e-16	-2.1967	5.33936e-12	down
LDLRAP1	5.53269e-09	-1.71573	0.000138052	down
LENG1	1.77151e-06	-1.30503	0.0442028	down
LETM1	3.78766e-09	-1.22652	9.45098e-05	down
LHFPL6	1.07401e-06	-1.05793	0.0267988	down
LIG1	6.1278e-11	-1.39458	1.52901e-06	down
LIG3	2.25678e-10	-1.67277	5.63111e-06	down
LIMK1	9.40805e-09	-1.26406	0.00023475	down
LIPT1	9.51652e-07	-1.34758	0.0237456	down
LITAF	1.50641e-06	-1.67286	0.0375879	down
LMBR1L	4.57761e-07	-1.13716	0.0114221	down
LMF2	3.21255e-12	-1.03354	8.01595e-08	down
LOC100424768	1.8161e-06	-1.25581	0.0453153	down
LOC100425856	1.47967e-10	-1.58635	3.69207e-06	down
LOC100426750	3.59318e-09	-1.51937	8.9657e-05	down
LOC100427042	4.87336e-13	-1.10447	1.216e-08	down
LOC100427953	3.99529e-11	-2.08339	9.96904e-07	down
LOC100427976	8.50273e-08	-1.08112	0.0021216	down
LOC100429232	6.43076e-14	-2.44316	1.6046e-09	down
LOC100429403	2.13324e-13	-2.65884	5.32285e-09	down
LOC100430381	2.54668e-16	-1.6604	6.35448e-12	down
LOC100430397	9.95832e-07	-1.32661	0.024848	down
LOC100430953	9.96393e-08	-1.18316	0.0024862	down
LOC106992427	3.23732e-07	-1.06834	0.00807775	down
LOC106992546	8.52703e-09	-1.16782	0.000212766	down
LOC106992625	1.06273e-10	-1.02391	2.65172e-06	down
LOC106992896	2.69395e-07	-1.10635	0.00672195	down
LOC106993019	9.44771e-07	-1.7014	0.0235739	down
LOC106993234	1.69004e-06	-1.06829	0.04217	down
LOC106993384	1.50192e-15	-2.29068	3.7476e-11	down
LOC106993424	5.60637e-11	-2.38223	1.3989e-06	down
LOC106993503	2.12143e-11	-1.96732	5.29339e-07	down
LOC106993851	1.33618e-08	-2.25488	0.000333404	down
LOC106993955	9.30227e-09	-1.50377	0.00023211	down
LOC106994319	3.72613e-08	-1.22806	0.000929744	down
LOC106994346	4.9916e-09	-2.18483	0.000124551	down
LOC106994381	3.57587e-12	-2.67157	8.9225e-08	down
LOC106994392	5.69661e-14	-3.08175	1.42142e-09	down
LOC106994850	9.2346e-07	-1.68709	0.0230422	down
LOC106994875	1.98868e-08	-1.66467	0.000496216	down
LOC106994941	1.11768e-06	-1.4783	0.0278883	down
LOC106995085	8.43029e-09	-1.62226	0.000210353	down
LOC106995105	1.18729e-13	-1.75686	2.96252e-09	down
LOC106995501	4.6945e-07	-1.79674	0.0117137	down
LOC106995573	8.94419e-11	-1.05279	2.23175e-06	down
LOC106995779	1.53449e-07	-1.54852	0.00382886	down
LOC106995978	4.78785e-10	-2.19228	1.19466e-05	down
LOC106996415	1.65805e-08	-1.58317	0.000413717	down
LOC106996453	1.69826e-07	-1.40104	0.00423749	down
LOC106996456	1.72054e-07	-1.13362	0.00429308	down
LOC106996503	5.3563e-08	-2.09035	0.0013365	down
LOC106996686	3.28187e-08	-1.13474	0.000818892	down
LOC106996872	1.31662e-09	-1.35789	3.28523e-05	down
LOC106997514	7.35798e-07	-1.20809	0.0183596	down
LOC106997596	1.98735e-07	-1.70631	0.00495885	down
LOC106997972	1.62447e-14	-2.12339	4.05337e-10	down
LOC106998022	2.28518e-16	-2.10494	5.70199e-12	down
LOC106998188	5.07061e-07	-1.04398	0.0126522	down
LOC106998274	2.83157e-07	-1.62572	0.00706532	down
LOC106998347	1.81166e-14	-1.90275	4.52046e-10	down
LOC106999090	1.98389e-11	-1.25709	4.95021e-07	down
LOC106999101	1.58885e-07	-1.11915	0.0039645	down
LOC106999161	7.69343e-07	-1.03926	0.0191966	down
LOC106999648	8.11612e-14	-1.84721	2.02513e-09	down
LOC106999673	2.7861e-11	-1.25328	6.95188e-07	down
LOC106999687	2.63026e-08	-1.67146	0.000656303	down
LOC107000678	1.00481e-09	-1.40973	2.50721e-05	down
LOC107000705	1.33228e-06	-1.17834	0.0332431	down
LOC114669750	2.95005e-09	-1.76731	7.36098e-05	down
LOC114669780	2.35459e-09	-1.30489	5.87518e-05	down
LOC114669790	2.89965e-07	-1.44789	0.0072352	down
LOC114669849	6.38179e-17	-1.52125	1.59238e-12	down
LOC114669852	3.02185e-10	-1.65549	7.54012e-06	down
LOC114669857	1.66019e-12	-1.58164	4.14251e-08	down
LOC114669869	6.49391e-07	-2.51155	0.0162036	down
LOC114670057	2.0378e-07	-1.83512	0.00508473	down
LOC114670528	9.41974e-09	-1.65164	0.000235041	down
LOC114670545	2.3901e-09	-1.7825	5.96377e-05	down
LOC114670565	1.54094e-07	-2.03756	0.00384495	down
LOC114670785	4.91199e-09	-1.2704	0.000122564	down
LOC114671418	2.77945e-09	-1.11772	6.93528e-05	down
LOC114671522	6.10889e-08	-1.23698	0.00152429	down
LOC114672186	2.16937e-11	-1.15185	5.41302e-07	down
LOC114672447	4.02325e-10	-1.86331	1.00388e-05	down
LOC114672632	9.21643e-08	-2.25435	0.00229968	down
LOC114672685	2.20221e-08	-1.76656	0.000549497	down
LOC114672710	2.66682e-10	-2.01152	6.65426e-06	down
LOC114672819	7.82997e-08	-1.96752	0.00195373	down
LOC114672822	2.45351e-14	-1.0845	6.122e-10	down
LOC114673703	2.38267e-08	-1.31947	0.000594523	down
LOC114673795	1.3406e-08	-1.71014	0.000334507	down
LOC114673852	1.59569e-07	-1.95708	0.00398156	down
LOC114674048	5.94322e-10	-1.63661	1.48295e-05	down
LOC114674302	8.52025e-13	-2.15573	2.12597e-08	down
LOC114674404	3.7243e-09	-1.82462	9.29286e-05	down
LOC114675520	4.28118e-07	-1.16412	0.0106824	down
LOC114675526	4.66994e-08	-1.06615	0.00116524	down
LOC114675553	2.18316e-07	-1.67528	0.00544742	down
LOC114676215	1.25449e-08	-1.56208	0.000313021	down
LOC114676806	3.00086e-10	-1.55331	7.48774e-06	down
LOC114677055	8.91065e-13	-2.84425	2.22338e-08	down
LOC114677434	4.66512e-10	-1.88575	1.16404e-05	down
LOC114677677	4.59123e-07	-1.16198	0.011456	down
LOC114678366	5.40762e-10	-2.06023	1.34931e-05	down
LOC114678708	3.26502e-09	-1.83612	8.14688e-05	down
LOC114678709	3.00827e-10	-2.59883	7.50623e-06	down
LOC114678831	1.53807e-06	-1.33558	0.038378	down
LOC114679003	5.11477e-17	-2.27706	1.27624e-12	down
LOC114679374	9.75934e-10	-1.0924	2.43515e-05	down
LOC114679689	7.07748e-09	-2.27209	0.000176597	down
LOC114680165	6.69081e-07	-1.25176	0.0166949	down
LOC114680352	4.31469e-08	-1.30592	0.0010766	down
LOC693480	2.32326e-13	-1.75069	5.79701e-09	down
LOC695050	1.60181e-11	-1.43969	3.99684e-07	down
LOC695122	2.77935e-07	-1.05933	0.00693502	down
LOC695703	6.62872e-09	-1.72904	0.0001654	down
LOC695938	1.6478e-06	-1.10468	0.0411159	down
LOC696103	1.20879e-12	-2.69797	3.01617e-08	down
LOC696808	6.75845e-10	-1.38391	1.68637e-05	down
LOC697254	6.7328e-09	-2.45482	0.000167997	down
LOC698086	5.33305e-12	-1.5679	1.3307e-07	down
LOC698130	8.19293e-08	-1.65695	0.0020443	down
LOC698226	5.85695e-10	-2.06667	1.46143e-05	down
LOC698297	1.01854e-11	-1.0148	2.54147e-07	down
LOC700257	5.50449e-09	-1.65686	0.000137348	down
LOC701966	1.03011e-07	-1.09094	0.00257033	down
LOC702108	4.74087e-09	-1.33936	0.000118294	down
LOC702723	2.63258e-08	-1.42414	0.000656882	down
LOC702875	1.05248e-06	-1.10732	0.0262614	down
LOC703074	8.46706e-08	-2.92632	0.0021127	down
LOC703365	3.13152e-12	-2.00109	7.81376e-08	down
LOC703550	4.29266e-11	-1.44367	1.07111e-06	down
LOC703685	2.51454e-07	-1.05961	0.00627429	down
LOC704083	1.96285e-08	-2.11496	0.00048977	down
LOC704394	2.23389e-07	-1.10569	0.005574	down
LOC704463	1.0714e-09	-1.39264	2.67337e-05	down
LOC705696	7.55742e-14	-2.04062	1.88573e-09	down
LOC706087	3.7908e-08	-1.9111	0.000945881	down
LOC706646	3.68222e-10	-1.04401	9.18786e-06	down
LOC706862	2.33596e-12	-1.56019	5.8287e-08	down
LOC707459	6.72446e-13	-1.80786	1.67789e-08	down
LOC707549	2.82733e-08	-1.24221	0.000705476	down
LOC707726	8.7008e-07	-1.3856	0.0217102	down
LOC707834	2.38243e-07	-1.43817	0.00594464	down
LOC708405	1.63036e-11	-1.88153	4.06808e-07	down
LOC708952	1.82705e-10	-2.20333	4.55885e-06	down
LOC709769	4.52659e-10	-1.33563	1.12948e-05	down
LOC710189	7.02858e-14	-1.54995	1.75377e-09	down
LOC710245	4.37154e-07	-1.21455	0.0109079	down
LOC710595	1.73254e-11	-1.60746	4.32304e-07	down
LOC711626	3.40553e-11	-2.55627	8.49748e-07	down
LOC711890	9.01704e-08	-2.39029	0.00224993	down
LOC712203	3.75765e-18	-2.29236	9.3761e-14	down
LOC712324	4.98357e-10	-1.7612	1.2435e-05	down
LOC713683	2.84194e-08	-1.46102	0.00070912	down
LOC714598	1.12365e-06	-1.65407	0.0280372	down
LOC715580	2.82183e-09	-1.50666	7.04103e-05	down
LOC715684	4.47854e-11	-1.39024	1.11749e-06	down
LOC716882	3.2247e-09	-1.71262	8.04627e-05	down
LOC719262	4.10468e-10	-1.09595	1.0242e-05	down
LOC719351	4.52924e-09	-1.21808	0.000113014	down
LOC719811	2.2408e-07	-1.15531	0.00559125	down
LOC720035	9.60647e-07	-1.10539	0.0239701	down
LOC720791	5.56871e-10	-1.191	1.38951e-05	down
LOC722074	1.38685e-06	-1.15358	0.0346046	down
LOC722798	1.06928e-08	-1.60059	0.000266806	down
LOC722862	7.96398e-08	-1.94949	0.00198717	down
LOC723355	1.24976e-08	-1.292	0.00031184	down
LONP1	3.69558e-07	-1.24582	0.00922121	down
LOXL2	2.21298e-15	-1.31562	5.52182e-11	down
LRCH4	5.18201e-09	-1.15428	0.000129301	down
LRRC23	1.3575e-11	-1.46192	3.38724e-07	down
LRRC27	4.99333e-07	-1.03543	0.0124594	down
LRRC46	1.78434e-06	-1.10182	0.0445227	down
LRRC47	5.04593e-09	-1.09143	0.000125906	down
LRRC8A	1.1284e-07	-1.08714	0.00281559	down
LRWD1	5.84432e-09	-1.4735	0.000145828	down
LSM10	3.16668e-08	-2.21917	0.000790151	down
LSM2	1.07644e-08	-1.76353	0.000268594	down
LYPLA1	7.98757e-11	-1.31665	1.99306e-06	down
LYSMD4	1.46779e-09	-1.19105	3.66243e-05	down
M6PR	4.73763e-07	-1.12646	0.0118213	down
MALRD1	2.3997e-12	-1.18679	5.98773e-08	down
MAN2B1	2.30834e-15	-1.04437	5.75976e-11	down
MANSC1	3.64439e-08	-1.36772	0.000909349	down
MAP1LC3A	9.22768e-12	-1.69448	2.30249e-07	down
MAP1S	4.24319e-13	-1.85118	1.05876e-08	down
MAP2K2	2.9751e-10	-1.12037	7.42348e-06	down
MAT2A	1.5225e-09	-1.49717	3.79893e-05	down
MATR3	1.81934e-08	-1.03052	0.000453962	down
MB21D2	4.69037e-11	-1.42194	1.17034e-06	down
MBD1	2.46522e-08	-1.19487	0.000615122	down
MCAT	1.64369e-08	-1.85497	0.000410132	down
MCM5	1.77713e-11	-2.07623	4.43429e-07	down
MCM7	3.30252e-12	-1.80463	8.24045e-08	down
MCRIP1	1.75305e-06	-1.4878	0.043742	down
MCRIP2	8.14836e-09	-1.63751	0.000203318	down
MEA1	2.25114e-11	-2.16068	5.61705e-07	down
MED11	2.6662e-07	-1.65397	0.0066527	down
MED16	2.16144e-10	-1.0357	5.39323e-06	down
MED19	1.88054e-06	-1.15385	0.0469232	down
MED25	1.37315e-10	-1.07766	3.42629e-06	down
MED29	1.00957e-07	-1.50747	0.00251908	down
MED31	2.09115e-11	-1.23191	5.21784e-07	down
MED9	2.03449e-10	-1.28385	5.07647e-06	down
MEN1	2.32199e-08	-1.41902	0.000579383	down
MEPCE	5.25713e-07	-1.19872	0.0131176	down
MFHAS1	3.9413e-08	-1.21531	0.000983433	down
MFN2	1.13021e-07	-1.24207	0.00282009	down
MFSD11	1.37509e-09	-1.34676	3.43113e-05	down
MGMT	2.00733e-09	-2.03231	5.00869e-05	down
MICAL3	4.03573e-14	-1.77918	1.007e-09	down
MICB	1.90726e-07	-1.14678	0.00475899	down
MLST8	7.87745e-12	-1.88738	1.96558e-07	down
MLYCD	1.23673e-15	-1.24886	3.08588e-11	down
MMP19	6.58228e-09	-1.36039	0.000164241	down
MMS19	2.78499e-10	-1.51056	6.94912e-06	down
MOB2	2.50373e-09	-1.52015	6.24731e-05	down
MON1A	4.1185e-10	-1.18262	1.02765e-05	down
MORC2	4.90636e-12	-1.18218	1.22424e-07	down
MPC1	1.44748e-07	-1.70097	0.00361175	down
MPP1	9.72745e-16	-2.19216	2.42719e-11	down
MPP2	3.71045e-07	-1.37202	0.00925833	down
MPP7	3.81127e-10	-1.49352	9.50988e-06	down
MRM1	7.50959e-12	-1.29363	1.87379e-07	down
MRPL15	7.08428e-11	-1.55064	1.76767e-06	down
MRPL17	9.59296e-10	-1.46323	2.39364e-05	down
MRPL2	3.50338e-10	-1.60263	8.74164e-06	down
MRPL34	2.60686e-09	-1.8732	6.50463e-05	down
MRPL35	2.16771e-14	-1.38493	5.40887e-10	down
MRPL40	4.9117e-09	-1.68694	0.000122557	down
MRPL55	5.23487e-10	-2.39192	1.30621e-05	down
MRPL9	1.40747e-11	-1.72901	3.51193e-07	down
MRPS18B	2.36364e-09	-1.79563	5.89775e-05	down
MRPS2	7.45038e-13	-1.75311	1.85902e-08	down
MRPS21	6.54057e-08	-1.40789	0.001632	down
MRPS22	1.13598e-15	-1.89437	2.83451e-11	down
MRPS35	5.17773e-07	-1.26901	0.0129195	down
MRPS6	7.11307e-08	-1.27906	0.00177485	down
MS4A10	1.0268e-07	-1.50586	0.00256208	down
MS4A15	5.33579e-10	-1.31491	1.33139e-05	down
MSRA	1.26468e-11	-1.71392	3.15564e-07	down
MT1X	6.59096e-08	-2.25458	0.00164458	down
MTFR1L	9.81702e-17	-2.29934	2.44954e-12	down
MTFR2	4.48895e-08	-1.49875	0.00112008	down
MTG1	3.65193e-10	-2.16612	9.1123e-06	down
MTG2	6.75011e-09	-1.32533	0.000168429	down
MTHFSD	1.0517e-06	-1.44611	0.026242	down
MTMR14	6.66166e-09	-1.87669	0.000166222	down
MTMR3	1.2699e-06	-1.09203	0.0316866	down
MTUS2	4.99861e-09	-1.14041	0.000124725	down
MUL1	1.8243e-10	-1.55793	4.55199e-06	down
MVD	2.13511e-07	-1.14739	0.00532753	down
MVP	1.33777e-19	-3.16286	3.33801e-15	down
MYBBP1A	1.03445e-09	-1.4357	2.58115e-05	down
MYBL2	5.97978e-11	-1.48504	1.49208e-06	down
MYCBP	1.5223e-09	-1.25972	3.79844e-05	down
MYL10	5.59154e-07	-1.83071	0.013952	down
MYO1C	6.56584e-08	-1.33689	0.00163831	down
NAA60	4.49187e-08	-1.11358	0.00112081	down
NADSYN1	1.13302e-15	-1.84351	2.82711e-11	down
NANOS1	5.09327e-10	-1.73315	1.27087e-05	down
NANS	5.12087e-08	-1.73699	0.00127776	down
NAPA	6.77542e-10	-1.88297	1.6906e-05	down
NARF	1.8741e-13	-2.54211	4.67626e-09	down
NARS	7.86582e-13	-1.7322	1.96268e-08	down
NAT1	2.07639e-12	-1.05772	5.18102e-08	down
NAXE	3.14676e-07	-1.60585	0.00785179	down
NCAPH	1.65621e-10	-2.78984	4.13259e-06	down
NCAPH2	7.82297e-11	-1.10664	1.95199e-06	down
NCBP2	1.84369e-08	-1.49785	0.000460037	down
NCK1	4.94806e-14	-2.16348	1.23464e-09	down
NCK2	1.57764e-13	-1.52413	3.93652e-09	down
NDC1	1.13343e-06	-1.08888	0.0282813	down
NDOR1	1.72497e-10	-1.40555	4.30414e-06	down
NDRG4	1.31292e-06	-1.15228	0.0327599	down
NDUFA10	1.95969e-09	-1.48219	4.88981e-05	down
NDUFA2	1.52404e-09	-2.06597	3.80279e-05	down
NDUFAF8	2.83637e-07	-1.4175	0.00707731	down
NDUFB11	7.91082e-10	-1.94444	1.97391e-05	down
NDUFV1	8.45711e-11	-1.99966	2.11022e-06	down
NECAB3	1.40171e-08	-1.51818	0.000349756	down
NECAP1	4.34277e-11	-1.18941	1.08361e-06	down
NECTIN2	1.01748e-09	-1.18056	2.53882e-05	down
NELFE	6.74615e-11	-1.7765	1.6833e-06	down
NELL1	1.33373e-06	-1.05041	0.0332793	down
NENF	1.54367e-07	-1.47223	0.00385177	down
NETO1	5.70666e-07	-2.14532	0.0142392	down
NFKBIE	2.74345e-11	-1.07336	6.84545e-07	down
NFS1	1.48262e-13	-1.28864	3.69944e-09	down
NIF3L1	1.66306e-08	-1.10754	0.000414967	down
NINJ2	3.21299e-07	-1.97321	0.00801705	down
NLRP2	2.88617e-09	-1.85242	7.20157e-05	down
NLRP5	4.34634e-13	-2.83095	1.0845e-08	down
NLRP7	3.1772e-09	-2.09763	7.92775e-05	down
NLRP8	5.87314e-09	-2.54629	0.000146547	down
NLRP9	1.16521e-08	-2.09464	0.000290743	down
NME3	1.68896e-06	-1.41864	0.0421429	down
NME4	9.30373e-07	-1.64593	0.0232147	down
NMRAL1	6.3791e-10	-1.5572	1.59171e-05	down
NOL12	5.75324e-11	-2.54724	1.43555e-06	down
NOL6	9.62146e-10	-1.11342	2.40075e-05	down
NONO	8.18226e-10	-1.08819	2.04164e-05	down
NOP53	1.22408e-10	-1.48397	3.05433e-06	down
NOP9	2.11547e-07	-1.25319	0.00527853	down
NOSIP	9.34718e-13	-2.10964	2.33231e-08	down
NOXA1	8.97123e-13	-1.02519	2.2385e-08	down
NPAS1	1.73593e-18	-2.22077	4.33149e-14	down
NPM3	2.36652e-07	-1.53324	0.00590494	down
NR1H3	4.40062e-08	-1.22669	0.00109804	down
NR1I2	5.072e-08	-1.43162	0.00126556	down
NR2C2AP	3.96783e-14	-1.79919	9.90054e-10	down
NRBP1	2.57207e-12	-1.91511	6.41784e-08	down
NSA2	8.58512e-13	-1.50751	2.14216e-08	down
NSUN5	3.26512e-13	-2.44352	8.14713e-09	down
NSUN6	9.77155e-08	-1.13571	0.0024382	down
NT5C	4.20968e-09	-1.82775	0.00010504	down
NT5M	1.39443e-12	-1.30432	3.47937e-08	down
NUBP2	7.62729e-07	-1.57711	0.0190316	down
NUDC	2.90011e-10	-2.12565	7.23637e-06	down
NUDCD3	1.98534e-06	-1.03323	0.0495383	down
NUDT16	3.10583e-13	-2.42129	7.74967e-09	down
NXF1	4.42432e-07	-1.35373	0.0110396	down
NXPH1	3.37959e-07	-1.15618	0.00843275	down
NXT1	1.14795e-06	-1.81187	0.0286435	down
ODF2	2.61348e-10	-1.30189	6.52116e-06	down
OGDHL	1.70836e-12	-1.55301	4.26271e-08	down
OOSP4B	9.43494e-07	-1.39976	0.0235421	down
OPA3	2.90553e-09	-1.61405	7.24988e-05	down
ORC1	9.37952e-11	-1.38879	2.34038e-06	down
ORC2	1.32477e-09	-1.46348	3.30556e-05	down
OS9	2.36727e-07	-1.25838	0.00590681	down
OSBPL10	1.35329e-09	-1.48008	3.37672e-05	down
OSCP1	6.43302e-09	-1.63465	0.000160517	down
OSER1	9.70328e-07	-1.46125	0.0242116	down
OTOP3	3.63071e-16	-1.3605	9.05935e-12	down
OTUD7B	2.24255e-08	-1.29531	0.00055956	down
OXLD1	7.36178e-09	-1.89531	0.000183691	down
PABPC1L	1.24873e-14	-1.80988	3.11584e-10	down
PADI6	1.45388e-12	-2.24704	3.62772e-08	down
PAF1	8.37047e-08	-1.30855	0.0020886	down
PAFAH2	4.56513e-09	-1.232	0.000113909	down
PAGR1	1.83635e-10	-2.18431	4.58206e-06	down
PAIP2	6.84745e-10	-1.83163	1.70858e-05	down
PANK4	3.4904e-14	-1.29488	8.70924e-10	down
PAQR7	4.56262e-18	-2.61961	1.13847e-13	down
PARVB	1.0774e-16	-1.46293	2.68832e-12	down
PCCA	2.69213e-14	-1.86533	6.71739e-10	down
PCYOX1L	1.9774e-07	-1.7609	0.00493401	down
PDAP1	5.51337e-08	-1.06621	0.0013757	down
PDE12	1.97775e-07	-1.0502	0.00493488	down
PDHA1	6.1323e-12	-2.30581	1.53013e-07	down
PDLIM2	6.04481e-14	-3.35965	1.5083e-09	down
PDRG1	1.51413e-12	-1.27592	3.77806e-08	down
PDSS1	2.11893e-07	-1.17971	0.00528716	down
PDZK1	1.96385e-11	-2.07613	4.9002e-07	down
PELP1	5.94532e-10	-1.48045	1.48348e-05	down
PES1	3.93915e-11	-1.64454	9.82898e-07	down
PEX11A	1.88248e-08	-1.37481	0.000469717	down
PEX14	2.71178e-11	-1.50345	6.76643e-07	down
PFDN1	8.03298e-09	-1.12976	0.000200439	down
PFDN6	9.66589e-12	-1.46297	2.41183e-07	down
PFKFB2	3.07298e-07	-1.1049	0.00766769	down
PFKP	8.72846e-07	-1.23734	0.0217792	down
PGM3	1.39885e-06	-1.10603	0.0349041	down
PGPEP1	9.24241e-07	-1.51304	0.0230617	down
PGS1	1.9902e-10	-1.60471	4.96594e-06	down
PHLDB3	2.05509e-08	-1.93544	0.000512785	down
PHRF1	8.9686e-12	-1.8292	2.23785e-07	down
PIGC	2.92894e-07	-1.45197	0.00730829	down
PIGH	1.05543e-09	-1.43354	2.6335e-05	down
PIGX	8.76464e-08	-1.17756	0.00218695	down
PIH1D2	1.10012e-08	-1.11725	0.000274502	down
PIM2	1.27818e-10	-1.46207	3.18931e-06	down
PIN4	1.02236e-09	-1.23008	2.55099e-05	down
PINX1	2.65148e-07	-1.6989	0.00661598	down
PITRM1	3.88979e-08	-1.50426	0.000970581	down
PITX1	2.68525e-09	-1.05572	6.70024e-05	down
PKM	6.68188e-10	-1.8388	1.66726e-05	down
PLCH2	3.37791e-11	-1.08679	8.42857e-07	down
PLEKHG1	2.52589e-08	-1.06045	0.000630259	down
PLEKHG3	2.35321e-09	-1.04283	5.87173e-05	down
PLEKHG5	5.41294e-11	-1.61514	1.35064e-06	down
PLEKHG6	1.54332e-12	-1.40089	3.85089e-08	down
PLEKHM1	1.98777e-09	-1.40577	4.95988e-05	down
PLIN3	4.12142e-07	-1.43332	0.0102838	down
PLIN5	2.0982e-15	-2.22329	5.23544e-11	down
PLK1	4.26233e-12	-1.64767	1.06354e-07	down
PLPP4	6.24277e-08	-1.5101	0.0015577	down
PLPP7	4.64182e-07	-1.54454	0.0115823	down
PMM1	2.95021e-07	-1.02089	0.00736136	down
PMM2	4.87011e-07	-1.21115	0.0121519	down
PNKP	8.66536e-10	-1.40824	2.16218e-05	down
PNLDC1	2.97724e-10	-2.2486	7.42882e-06	down
PNMA8A	1.09398e-09	-1.08582	2.72971e-05	down
PNP	2.36745e-08	-1.73467	0.000590726	down
PNPLA2	8.33752e-08	-1.38371	0.00208038	down
PNPT1	1.05685e-06	-1.13741	0.0263705	down
POC1A	1.48475e-10	-1.25273	3.70475e-06	down
POFUT2	4.48686e-10	-1.3399	1.11956e-05	down
POLA2	1.66853e-06	-1.64702	0.0416333	down
POLDIP2	2.94269e-09	-2.3802	7.3426e-05	down
POLE3	2.31094e-07	-1.14142	0.00576625	down
POLE4	2.71041e-09	-1.82295	6.76301e-05	down
POLL	9.52288e-17	-2.16762	2.37615e-12	down
POLR1B	1.50305e-08	-1.24494	0.000375041	down
POLR1E	9.41561e-17	-1.64249	2.34938e-12	down
POLR2L	3.20879e-12	-2.56582	8.00656e-08	down
POLR3C	8.7625e-08	-1.24933	0.00218642	down
POLR3F	4.66208e-08	-1.36423	0.00116328	down
POMGNT2	8.13351e-08	-1.2271	0.00202947	down
POMT1	2.39779e-14	-1.49447	5.98298e-10	down
POP4	2.12877e-08	-1.28828	0.000531172	down
POP5	4.27922e-07	-1.2521	0.0106775	down
POR	2.54344e-10	-1.84032	6.34638e-06	down
PPCDC	7.03824e-09	-1.63608	0.000175618	down
PPCS	4.62474e-09	-1.81706	0.000115397	down
PPIB	4.10071e-07	-1.66111	0.0102321	down
PPIF	4.95027e-13	-2.37235	1.23519e-08	down
PPOX	5.32936e-14	-1.91997	1.32978e-09	down
PPP1R3C	2.84449e-09	-1.75562	7.09757e-05	down
PQBP1	5.81646e-12	-2.23241	1.45132e-07	down
PRDM10	6.36631e-07	-1.0872	0.0158852	down
PRDX1	4.69236e-08	-1.30011	0.00117084	down
PREB	8.19144e-08	-1.17545	0.00204393	down
PRKAB1	4.25082e-10	-1.86463	1.06067e-05	down
PRKD2	1.84457e-08	-1.67646	0.000460257	down
PRLHR	4.72532e-07	-1.10827	0.0117906	down
PRMT7	6.30955e-13	-1.59922	1.57436e-08	down
PROCR	1.26663e-12	-2.77986	3.16049e-08	down
PRPF18	2.26715e-16	-2.70693	5.65699e-12	down
PRPF19	1.19183e-12	-2.25391	2.97385e-08	down
PRPSAP1	3.80865e-14	-2.68105	9.50336e-10	down
PRR5	2.95853e-09	-1.50696	7.38213e-05	down
PRR5L	8.78638e-08	-1.27688	0.00219238	down
PRRC2B	4.8831e-10	-1.38904	1.21843e-05	down
PSAP	2.30038e-11	-2.0172	5.73991e-07	down
PSEN1	1.57705e-07	-1.29149	0.00393506	down
PSEN2	6.93049e-08	-1.16775	0.0017293	down
PSKH1	2.31004e-07	-1.08322	0.00576402	down
PSMB5	1.65273e-09	-1.81712	4.12388e-05	down
PSMC1	3.73986e-07	-1.4774	0.00933169	down
PSMC5	6.46144e-09	-2.01988	0.000161226	down
PSMC6	2.35261e-10	-1.71647	5.87024e-06	down
PSMD14	6.26383e-08	-1.47149	0.00156295	down
PSMD8	9.5105e-12	-1.9761	2.37306e-07	down
PSMF1	1.30058e-07	-1.16263	0.00324521	down
PTBP1	6.92693e-11	-1.80983	1.72841e-06	down
PTGES2	2.89195e-10	-1.15129	7.216e-06	down
PTPRH	2.34144e-08	-1.2859	0.000584236	down
PUF60	3.4772e-16	-2.46561	8.67632e-12	down
PWP2	8.38734e-09	-1.50721	0.000209281	down
PXMP4	6.63962e-13	-1.94212	1.65672e-08	down
PYM1	5.76323e-07	-1.3955	0.0143804	down
QRICH1	2.42998e-09	-1.12828	6.06328e-05	down
RAB3D	1.38458e-09	-1.3369	3.4548e-05	down
RAB6B	6.58e-11	-1.80284	1.64184e-06	down
RABIF	1.42901e-07	-1.21798	0.00356567	down
RABL3	7.48376e-12	-1.60159	1.86735e-07	down
RAD23B	2.00243e-11	-1.15629	4.99645e-07	down
RAD51	6.22001e-08	-1.42383	0.00155202	down
RAE1	6.58536e-09	-1.18659	0.000164318	down
RANGAP1	7.50471e-09	-1.48752	0.000187258	down
RAP2B	8.23259e-10	-1.09282	2.0542e-05	down
RARA	1.85048e-12	-1.15395	4.61731e-08	down
RASA4B	2.50447e-16	-1.75013	6.24915e-12	down
RASGRP2	4.70968e-12	-1.23942	1.17516e-07	down
RBFA	1.85066e-09	-1.62881	4.61776e-05	down
RBKS	1.42137e-07	-1.15888	0.00354661	down
RBM23	1.84948e-07	-1.25879	0.00461483	down
RBM3	5.38338e-12	-1.82135	1.34326e-07	down
RBM33	1.04696e-09	-1.34305	2.61237e-05	down
RBM38	2.57021e-08	-1.23016	0.00064132	down
RBM42	5.61188e-09	-1.42672	0.000140028	down
RCL1	8.04797e-08	-1.63676	0.00200813	down
RCN3	8.89324e-13	-1.8112	2.21904e-08	down
RDH13	4.09257e-11	-1.8528	1.02118e-06	down
REC114	1.16333e-10	-1.59862	2.90273e-06	down
RECQL5	4.53817e-14	-1.15346	1.13236e-09	down
REEP2	6.17418e-12	-2.43224	1.54058e-07	down
REL	3.13065e-09	-1.3841	7.81159e-05	down
RELA	1.11933e-06	-1.15208	0.0279294	down
RFC2	1.09767e-06	-1.36554	0.027389	down
RFC5	2.47548e-07	-1.15292	0.00617683	down
RFTN1	5.90557e-14	-1.53674	1.47356e-09	down
RGS10	3.85787e-12	-1.00337	9.62616e-08	down
RGS19	1.05963e-09	-1.84597	2.64398e-05	down
RGS2	3.8137e-10	-1.77876	9.51594e-06	down
RHBDF2	2.82567e-08	-1.4815	0.000705062	down
RHOG	3.51512e-07	-1.46686	0.00877094	down
RIC8A	8.06225e-07	-1.05647	0.0201169	down
RIMKLA	3.79482e-09	-1.10962	9.46884e-05	down
RIMS3	7.077e-12	-1.24546	1.76585e-07	down
RIN1	4.94221e-09	-1.15991	0.000123318	down
RIPOR2	1.37352e-07	-1.08551	0.00342721	down
RMDN3	7.0818e-13	-1.54402	1.76705e-08	down
RMND5B	1.31099e-09	-1.42539	3.27119e-05	down
RNASEK	1.62705e-08	-1.54322	0.000405982	down
RND1	1.68822e-08	-1.8325	0.000421245	down
RNF113A	1.11116e-12	-2.12293	2.77255e-08	down
RNF122	4.20674e-07	-1.05407	0.0104967	down
RNF166	2.63101e-08	-1.15633	0.00065649	down
RNF185	1.48454e-08	-1.38193	0.000370422	down
RNF31	3.92794e-10	-1.10472	9.801e-06	down
ROGDI	8.54275e-07	-1.74081	0.0213159	down
RPF1	1.42216e-10	-1.66299	3.54857e-06	down
RPL11	2.63807e-14	-1.95122	6.58251e-10	down
RPL13	1.71101e-07	-1.92168	0.0042693	down
RPL14	5.45959e-10	-1.5235	1.36228e-05	down
RPL17	4.8477e-10	-2.00392	1.2096e-05	down
RPL18	1.01309e-06	-1.47436	0.0252786	down
RPL27A	1.81604e-09	-2.1821	4.53139e-05	down
RPL28	5.02577e-07	-1.80539	0.0125403	down
RPL29	8.74631e-07	-1.74912	0.0218238	down
RPL35	1.02165e-07	-1.62825	0.00254922	down
RPL35A	1.7151e-10	-1.38171	4.27953e-06	down
RPL38	3.24553e-07	-1.74267	0.00809824	down
RPL39L	8.65848e-09	-1.56121	0.000216046	down
RPL4	3.44635e-09	-1.8499	8.59933e-05	down
RPL41	1.11491e-06	-1.39928	0.0278191	down
RPL7A	1.79923e-07	-2.06613	0.00448945	down
RPL9	1.35417e-08	-1.47144	0.000337893	down
RPP40	1.37216e-09	-1.90406	3.42382e-05	down
RPS10	4.32795e-10	-1.48846	1.07991e-05	down
RPS12	9.23469e-07	-2.34872	0.0230424	down
RPS24	4.85476e-08	-1.41668	0.00121136	down
RPS29	1.19382e-07	-1.07378	0.00297882	down
RPS3	8.26426e-07	-1.132	0.020621	down
RPS7	4.19719e-10	-1.45949	1.04728e-05	down
RPS8	5.57522e-07	-1.25909	0.0139113	down
RPSA	9.97937e-08	-1.54973	0.00249005	down
RPUSD4	2.86792e-09	-1.37653	7.15603e-05	down
RRM2	8.42253e-10	-1.91155	2.10159e-05	down
RRP7A	6.17119e-07	-1.16834	0.0153984	down
RSPH9	2.56664e-08	-1.44412	0.000640427	down
RTCB	2.84243e-13	-2.32656	7.09243e-09	down
RTEL1	2.75524e-13	-1.31831	6.87488e-09	down
RTF2	3.07095e-08	-1.60127	0.000766264	down
RUSC1	2.07696e-08	-1.2278	0.000518243	down
RUVBL2	6.17962e-07	-1.3197	0.0154194	down
S100PBP	1.29185e-10	-1.95284	3.22342e-06	down
SAMD4A	5.63004e-10	-1.54389	1.40481e-05	down
SAP18	1.0265e-07	-1.39136	0.00256131	down
SARS	5.54233e-08	-1.27967	0.00138292	down
SCAP	1.10827e-06	-1.07164	0.0276537	down
SDF4	1.21395e-08	-1.39207	0.000302906	down
SDHA	7.73198e-08	-1.66997	0.00192928	down
SDHAF3	2.25852e-10	-1.92161	5.63547e-06	down
SEC24C	1.14922e-07	-1.09078	0.00286755	down
SELENOT	1.146e-17	-1.12536	2.85951e-13	down
SEMA5B	1.3484e-07	-1.06663	0.00336452	down
SENP2	9.09627e-11	-1.39848	2.2697e-06	down
SENP3	1.70434e-08	-1.18134	0.000425267	down
SEPHS2	9.38131e-07	-1.13223	0.0234082	down
SERTAD1	3.16039e-12	-2.1847	7.88581e-08	down
SESN2	3.74671e-13	-1.12258	9.34879e-09	down
SETD6	7.38936e-10	-1.069	1.84379e-05	down
SF3A2	1.53134e-07	-1.07502	0.00382099	down
SF3B3	5.09634e-08	-1.26293	0.00127164	down
SGF29	3.7482e-11	-1.83191	9.3525e-07	down
SGSM3	1.16393e-12	-1.52353	2.90423e-08	down
SGTA	4.48992e-09	-1.80039	0.000112033	down
SH3BP1	7.63761e-12	-1.63189	1.90574e-07	down
SH3GLB1	1.48853e-06	-1.05234	0.0371418	down
SHARPIN	5.47035e-12	-1.58839	1.36496e-07	down
SHD	9.5667e-08	-1.57308	0.00238708	down
SIL1	2.07612e-08	-1.69978	0.000518032	down
SIPA1L1	1.42755e-06	-1.40378	0.0356203	down
SIRT7	4.51068e-07	-1.12889	0.011255	down
SKP1	1.73004e-09	-1.45587	4.3168e-05	down
SLC13A5	8.41183e-07	-1.43837	0.0209892	down
SLC25A1	3.26195e-07	-1.84522	0.00813922	down
SLC25A17	1.46139e-09	-1.38012	3.64647e-05	down
SLC25A26	9.77422e-10	-1.19379	2.43886e-05	down
SLC25A39	3.63442e-12	-2.27723	9.06861e-08	down
SLC25A48	9.4015e-08	-1.44309	0.00234586	down
SLC25A51	8.45372e-10	-1.27649	2.10937e-05	down
SLC26A6	3.6348e-11	-1.48626	9.06955e-07	down
SLC27A5	1.98438e-14	-1.31748	4.95142e-10	down
SLC35C1	4.1226e-07	-1.02402	0.0102867	down
SLC35C2	1.57377e-07	-1.26727	0.00392688	down
SLC35F2	2.28634e-10	-1.14199	5.70488e-06	down
SLC38A11	1.81996e-07	-1.09632	0.00454118	down
SLC39A3	1.36694e-11	-1.90946	3.41079e-07	down
SLC45A3	3.68052e-11	-1.24232	9.18364e-07	down
SLCO4A1	8.74378e-12	-1.51209	2.18175e-07	down
SMIM12	1.9505e-06	-1.53508	0.048669	down
SMIM30	1.43121e-12	-2.36216	3.57115e-08	down
SMOC1	3.50317e-07	-1.25399	0.00874111	down
SMOX	6.70471e-10	-1.07678	1.67296e-05	down
SMPD3	2.73868e-07	-1.31559	0.00683355	down
SMTNL2	4.61766e-09	-1.05783	0.00011522	down
SMYD2	5.64911e-08	-1.11108	0.00140957	down
SMYD3	1.95646e-07	-1.63295	0.00488177	down
SNAP47	1.38168e-10	-1.90137	3.44757e-06	down
SNPH	2.55162e-13	-1.17436	6.36679e-09	down
SNRPA	2.86802e-07	-1.2839	0.0071563	down
SNRPA1	6.23295e-11	-2.01224	1.55525e-06	down
SNRPC	2.66286e-12	-1.86649	6.64436e-08	down
SNTG1	4.02008e-12	-1.21901	1.00309e-07	down
SNUPN	2.40702e-08	-1.05299	0.000600599	down
SNX11	1.07579e-09	-1.65338	2.68431e-05	down
SNX8	1.00487e-08	-1.49371	0.000250736	down
SPATA6L	1.55863e-11	-2.0135	3.8891e-07	down
SPDYC	4.79342e-07	-1.41075	0.0119605	down
SPHKAP	1.26936e-09	-1.24338	3.16732e-05	down
SPNS1	2.85607e-07	-1.02929	0.00712646	down
SPTAN1	3.92333e-10	-1.0586	9.78949e-06	down
SQSTM1	3.96608e-08	-1.99314	0.000989616	down
SRM	4.40151e-10	-1.78148	1.09827e-05	down
SRPRB	2.55389e-10	-1.69223	6.37247e-06	down
SRRD	6.32464e-10	-1.59124	1.57812e-05	down
SRRT	2.27652e-08	-1.18904	0.000568038	down
SRSF7	2.81438e-07	-1.04662	0.00702244	down
SRSF9	4.98653e-08	-1.08317	0.00124424	down
SSBP1	4.95073e-09	-1.81895	0.00012353	down
SSR2	8.93774e-08	-1.26951	0.00223014	down
ST3GAL4	2.01008e-12	-1.85015	5.01555e-08	down
ST5	5.9626e-08	-1.03493	0.00148779	down
STARD5	7.54884e-07	-1.2912	0.0188359	down
STIP1	1.92492e-12	-2.12597	4.80305e-08	down
STK32B	4.17052e-08	-1.21359	0.00104063	down
STK32C	1.94501e-13	-2.40392	4.8532e-09	down
STK39	5.18586e-07	-1.10927	0.0129398	down
STK40	4.99011e-07	-1.07479	0.0124513	down
STMN1	1.55125e-09	-1.97188	3.87069e-05	down
STN1	3.78985e-08	-1.39311	0.000945644	down
STXBP1	6.52828e-07	-1.06962	0.0162894	down
SUGP1	1.31629e-09	-1.65655	3.28441e-05	down
SULT2A1	1.29236e-11	-1.69689	3.22469e-07	down
SUPT4H1	1.43006e-07	-1.42345	0.00356829	down
SUPT7L	1.10882e-07	-1.19476	0.00276673	down
SURF2	1.96323e-09	-1.70518	4.89865e-05	down
SURF4	4.88711e-09	-1.33777	0.000121943	down
SYCE1	4.7123e-11	-1.11742	1.17581e-06	down
TAF15	4.88645e-14	-1.17944	1.21927e-09	down
TAF1A	4.67463e-08	-1.60808	0.00116641	down
TAF8	8.22841e-08	-1.24991	0.00205315	down
TAFA5	5.08053e-09	-1.14907	0.000126769	down
TARBP2	3.38645e-13	-1.56397	8.44987e-09	down
TARS	1.86545e-06	-1.12457	0.0465468	down
TAX1BP3	2.57132e-08	-1.49642	0.000641595	down
TBC1D10A	1.23783e-07	-1.3121	0.00308863	down
TBC1D2	3.15917e-12	-1.16908	7.88277e-08	down
TBC1D8	3.73086e-08	-1.53899	0.000930923	down
TCEA3	9.45165e-07	-1.11731	0.0235838	down
TCF25	4.74889e-10	-1.25535	1.18494e-05	down
TECR	1.25652e-13	-1.73479	3.13526e-09	down
TEDC2	1.83646e-15	-2.10647	4.58233e-11	down
TENT5B	1.54141e-11	-1.46126	3.84612e-07	down
TERF2IP	4.51368e-07	-2.05995	0.0112625	down
TESC	2.4203e-09	-1.94266	6.03913e-05	down
TESK2	2.77659e-07	-1.19968	0.00692816	down
TET3	5.46088e-07	-1.03981	0.013626	down
TEX264	2.04177e-09	-1.69968	5.09464e-05	down
TEX30	1.40371e-07	-1.52491	0.00350254	down
TFAP4	5.23401e-10	-1.52777	1.30599e-05	down
TFIP11	3.94775e-09	-1.77265	9.85042e-05	down
TFPT	6.77803e-11	-1.71767	1.69125e-06	down
TGFBI	1.62101e-07	-1.30526	0.00404474	down
TGIF2	1.59335e-08	-1.27877	0.000397572	down
TGIF2LX	6.01459e-07	-1.39104	0.0150076	down
THAP1	1.43203e-11	-1.16186	3.57321e-07	down
THAP11	8.2098e-07	-1.18415	0.0204851	down
THEG	1.53938e-08	-1.04498	0.000384107	down
TIMM17B	7.96926e-10	-1.71346	1.98849e-05	down
TIMM22	1.46093e-07	-1.1806	0.00364532	down
TK1	3.627e-16	-2.18816	9.0501e-12	down
TLE2	5.26128e-09	-1.55277	0.000131279	down
TLE6	1.54084e-11	-3.21115	3.84469e-07	down
TLE7	1.00424e-07	-1.94662	0.00250577	down
TMC6	5.33425e-10	-1.01837	1.331e-05	down
TMCC2	8.15201e-09	-1.07362	0.000203409	down
TMED1	3.26033e-09	-1.32735	8.13518e-05	down
TMEM115	1.91841e-12	-1.6574	4.78682e-08	down
TMEM120B	1.26134e-11	-1.77467	3.14731e-07	down
TMEM132D	1.26908e-09	-1.2395	3.1666e-05	down
TMEM159	1.07757e-07	-1.13636	0.00268875	down
TMEM160	5.99112e-11	-1.59842	1.4949e-06	down
TMEM175	2.90012e-07	-1.11818	0.00723639	down
TMEM177	9.08494e-12	-1.81509	2.26687e-07	down
TMEM179B	8.62911e-10	-1.74386	2.15314e-05	down
TMEM18	1.05167e-07	-1.5859	0.00262412	down
TMEM183A	3.22639e-12	-1.57578	8.05049e-08	down
TMEM184B	8.05119e-09	-1.22412	0.000200893	down
TMEM203	4.87125e-07	-1.10935	0.0121547	down
TMEM33	2.597e-08	-1.13275	0.000648003	down
TMEM39B	3.06216e-09	-1.55736	7.64069e-05	down
TMUB1	1.44146e-06	-1.29021	0.0359674	down
TNNT1	2.29791e-12	-1.60475	5.73375e-08	down
TOB1	7.52973e-07	-1.58819	0.0187882	down
TOLLIP	3.15804e-10	-1.67534	7.87994e-06	down
TOM1L2	5.11164e-08	-1.20468	0.00127546	down
TOMM34	2.2247e-11	-1.49044	5.55108e-07	down
TPCN2	2.73471e-11	-1.18673	6.82366e-07	down
TRAP1	1.26114e-12	-1.79013	3.14679e-08	down
TRAPPC5	3.47969e-07	-1.21298	0.00868253	down
TRIAP1	2.05962e-09	-1.7152	5.13917e-05	down
TRIM11	1.65484e-10	-1.24906	4.12916e-06	down
TRIM26	4.56491e-08	-1.18195	0.00113904	down
TRIM3	1.69721e-07	-1.29111	0.00423487	down
TRIM44	1.28688e-09	-1.39368	3.21103e-05	down
TRIM63	3.60352e-09	-1.34468	8.99151e-05	down
TRIML2	1.65683e-10	-1.26269	4.13413e-06	down
TRIP4	3.14614e-08	-1.16687	0.000785026	down
TRPV4	1.86798e-07	-1.60476	0.00466098	down
TRPV6	1.09766e-11	-1.80698	2.73888e-07	down
TSACC	2.9802e-07	-1.08843	0.00743621	down
TSPAN14	4.92874e-07	-1.20575	0.0122982	down
TSR2	6.03193e-10	-1.81281	1.50509e-05	down
TTC9C	2.73841e-11	-1.71671	6.83287e-07	down
TTI2	1.37086e-11	-1.78362	3.42056e-07	down
TUBA4A	6.02366e-12	-2.23087	1.50302e-07	down
TUBB8	2.36932e-11	-2.47597	5.91193e-07	down
TUBD1	8.92318e-09	-1.17958	0.000222651	down
TUFM	6.10706e-09	-1.72792	0.000152383	down
TUFT1	1.98173e-08	-1.48108	0.000494482	down
TUT1	4.49471e-09	-1.13771	0.000112152	down
TXNDC9	6.05705e-07	-1.60743	0.0151136	down
TXNL1	8.48797e-07	-1.17346	0.0211792	down
TXNL4A	4.90664e-12	-2.5042	1.22431e-07	down
TYRO3	2.93662e-12	-1.01841	7.32746e-08	down
U2AF2	8.7407e-10	-1.28105	2.18098e-05	down
UBE2J2	1.44226e-07	-1.58928	0.00359872	down
UBE2S	1.45715e-09	-1.77846	3.63589e-05	down
UBL7	3.98729e-10	-1.60398	9.94909e-06	down
UBOX5	1.97317e-07	-1.2074	0.00492346	down
UBXN1	6.19781e-10	-2.39316	1.54648e-05	down
UBXN6	3.13541e-13	-1.76761	7.82348e-09	down
UCHL1	1.08935e-14	-2.5928	2.71816e-10	down
UQCRC1	5.13082e-10	-2.28641	1.28024e-05	down
URM1	2.14917e-07	-1.11816	0.00536261	down
UROD	1.28373e-06	-1.31912	0.0320315	down
UROS	1.93386e-08	-1.68924	0.000482536	down
USF1	1.02476e-08	-1.20014	0.000255699	down
USP15	1.64814e-06	-1.03007	0.0411244	down
USP20	2.04758e-13	-1.44097	5.10913e-09	down
USP5	2.62511e-08	-1.28141	0.000655018	down
UTP18	7.63215e-13	-1.82028	1.90437e-08	down
UXT	1.92172e-08	-1.55036	0.000479508	down
VAMP8	3.42341e-09	-1.63965	8.54208e-05	down
VDAC3	1.05952e-07	-1.73423	0.00264373	down
VLDLR	4.53711e-07	-1.34785	0.011321	down
VPS18	8.27278e-08	-1.03247	0.00206423	down
VPS25	5.05797e-09	-1.6156	0.000126207	down
VPS37B	9.3668e-07	-1.09263	0.023372	down
VPS4A	9.98281e-10	-1.49028	2.49091e-05	down
WBP2	6.37702e-08	-1.2549	0.00159119	down
WDR1	1.68116e-07	-1.34163	0.00419484	down
WDR25	4.1353e-10	-1.9196	1.03184e-05	down
WDR34	3.62084e-17	-1.50587	9.03472e-13	down
WDR41	8.02339e-07	-1.12654	0.02002	down
WDR61	1.47336e-07	-1.44594	0.00367632	down
WDR74	2.95652e-16	-1.50895	7.37711e-12	down
WDR82	1.0895e-08	-1.46522	0.000271852	down
WFDC2	1.01506e-09	-3.00852	2.53279e-05	down
WFS1	1.21619e-09	-1.27977	3.03464e-05	down
WLS	1.82054e-11	-1.91383	4.5426e-07	down
WWOX	3.10074e-08	-1.06475	0.000773697	down
WWP2	5.31099e-10	-1.13039	1.3252e-05	down
XAB2	1.75769e-12	-2.21755	4.38579e-08	down
XRCC6	1.19726e-08	-1.74838	0.000298739	down
YIPF1	2.3333e-08	-1.66518	0.000582205	down
YIPF2	2.13643e-08	-1.06839	0.000533083	down
YKT6	3.32805e-08	-1.10988	0.000830416	down
ZAR1	4.09262e-14	-1.24674	1.02119e-09	down
ZBTB17	5.52812e-09	-1.66233	0.000137938	down
ZBTB8B	1.92372e-09	-1.0294	4.80007e-05	down
ZC3H18	8.73089e-08	-1.02011	0.00217853	down
ZC4H2	3.58341e-09	-1.37203	8.94132e-05	down
ZCCHC12	7.69432e-08	-1.18629	0.00191989	down
ZCWPW1	1.66875e-07	-1.23409	0.00416386	down
ZDHHC13	9.80691e-07	-1.0653	0.0244702	down
ZFAND2A	3.24541e-07	-1.60837	0.00809795	down
ZFAND2B	1.11465e-06	-1.47978	0.0278127	down
ZFAND3	1.81347e-10	-1.0507	4.52498e-06	down
ZFR2	1.13424e-10	-1.09682	2.83015e-06	down
ZHX2	1.12742e-08	-1.03942	0.000281314	down
ZNF165	5.07818e-07	-1.23906	0.0126711	down
ZNF18	7.24735e-08	-1.925	0.00180836	down
ZNF2	6.56732e-10	-1.34043	1.63868e-05	down
ZNF212	8.14665e-13	-1.4717	2.03275e-08	down
ZNF214	1.2782e-06	-1.49218	0.0318935	down
ZNF235	6.94963e-11	-1.55504	1.73407e-06	down
ZNF24	4.44561e-08	-1.23447	0.00110927	down
ZNF266	1.94204e-07	-1.0434	0.00484578	down
ZNF274	9.32139e-08	-1.47689	0.00232587	down
ZNF283	2.58264e-07	-1.09843	0.00644421	down
ZNF3	4.33449e-07	-1.28229	0.0108154	down
ZNF337	5.66626e-12	-1.00256	1.41384e-07	down
ZNF394	9.39428e-08	-1.24936	0.00234406	down
ZNF408	1.76743e-12	-1.70601	4.4101e-08	down
ZNF410	1.76456e-09	-1.63732	4.40293e-05	down
ZNF414	2.39708e-09	-1.39801	5.9812e-05	down
ZNF416	3.06786e-09	-1.51729	7.65491e-05	down
ZNF428	1.44332e-07	-1.05626	0.00360138	down
ZNF511	1.73135e-06	-1.43204	0.0432007	down
ZNF526	4.603e-10	-1.67853	1.14854e-05	down
ZNF560	3.02123e-09	-1.05334	7.53856e-05	down
ZNF565	3.83918e-07	-1.1678	0.00957951	down
ZNF581	1.71482e-06	-1.4733	0.0427882	down
ZNF593	2.10768e-12	-2.95679	5.25909e-08	down
ZNF622	2.99639e-09	-1.63632	7.4766e-05	down
ZNF670	4.67357e-07	-1.22634	0.0116615	down
ZNF692	5.28533e-07	-1.10739	0.0131879	down
ZNF749	4.193e-09	-1.63122	0.000104624	down
ZNF77	2.24971e-12	-2.2125	5.61347e-08	down
ZNF821	9.22973e-07	-1.11181	0.02303	down
ZNF830	9.35666e-08	-1.56017	0.00233467	down
ZNF846	2.73682e-10	-1.15732	6.82892e-06	down
ZNF850	1.74919e-09	-1.18412	4.36457e-05	down
ZNF879	1.209e-13	-1.24251	3.0167e-09	down
ZNHIT2	4.25333e-07	-1.20192	0.0106129	down
ZNRD2	9.36955e-08	-1.25284	0.00233789	down

## Sheet: GO enrichment of OMII up genes
GO enrichment of upregulated genes in OMII
Category	Term	Count	%	P-value	Genes
GOTERM_BP_DIRECT	GO:0006413~translational initiation	4	1.99005	0.00390198	LOC718407, LOC114677626, EIF1, EIF2A
GOTERM_BP_DIRECT	GO:0006465~signal peptide processing	3	1.49254	0.00591694	SPCS2, LOC707684, PARL
GOTERM_BP_DIRECT	GO:0051301~cell division	7	3.48259	0.00850469	PPP1CB, CCNB1, PARD6B, CDC26, PDS5B, GNAI1, CDC14B
GOTERM_BP_DIRECT	GO:0001836~release of cytochrome c from mitochondria	3	1.49254	0.0119556	IFI27L2, IFI27, TP53
GOTERM_BP_DIRECT	GO:0032874~positive regulation of stress-activated MAPK cascade	3	1.49254	0.0131422	TAOK1, ARL6IP5, KLHDC10
GOTERM_BP_DIRECT	GO:0000070~mitotic sister chromatid segregation	3	1.49254	0.0156617	KIF18A, CENPK, KNSTRN
GOTERM_BP_DIRECT	GO:2001044~regulation of integrin-mediated signaling pathway	2	0.995025	0.0248755	TIMP1, CD177
GOTERM_BP_DIRECT	GO:0006325~chromatin organization	5	2.48756	0.0350878	HMGN5, RBBP7, HMGN2, BRDT, LOC711421
GOTERM_BP_DIRECT	GO:0042752~regulation of circadian rhythm	3	1.49254	0.0401239	TOP2A, PPP1CB, FBXW7
GOTERM_BP_DIRECT	GO:0043516~regulation of DNA damage response, signal transduction by p53 class mediator	2	0.995025	0.0411167	TP53, SOX4
GOTERM_BP_DIRECT	GO:0006974~DNA damage response	5	2.48756	0.0463301	TOP2A, FMR1, SGK1, HIGD1A, TP53
GOTERM_BP_DIRECT	GO:0050821~protein stabilization	5	2.48756	0.0471708	FBXW7, TP53, CRYAB, SOX4, OTUD3
GOTERM_BP_DIRECT	GO:1901800~positive regulation of proteasomal protein catabolic process	2	0.995025	0.0491362	FBXW7, TMTC3
GOTERM_BP_DIRECT	GO:1901985~positive regulation of protein acetylation	2	0.995025	0.0491362	TAOK1, CEP295
GOTERM_BP_DIRECT	GO:0097720~calcineurin-mediated signaling	2	0.995025	0.0491362	PPP3CA, CALM1

## Sheet: GO enrichmen of OMII down genes
GO enrichment of downregulated genes in OMII
Category	Term	Count	%	P-value	Genes
GOTERM_BP_DIRECT	GO:0006364~rRNA processing	22	1.72956	1.78631e-07	POP5, DDX49, RPS7, POP4, WDR74, RPL35A, NPM3, RBFA, UTP18, RPF1, BYSL, NOL6, RRP7A, FBL, NSA2, EXOSC4, GEMIN4, TSR2, PIH1D2, PIN4, NOP53, PELP1
GOTERM_BP_DIRECT	GO:0006412~translation	43	3.3805	2.718e-06	RPL4, RPL11, MRPL17, MRPL15, MRPL34, LOC114669857, RPL9, MRPL35, MRPL55, MRPL2, LOC706087, LOC704083, LOC100430397, RPS3, RPL14, RPL35, RPL13, LOC702723, RPL38, MRPL9, PAIP2, RPL18, RPL17, RPS12, RPL39L, RPL41, RPS7, RPS8, RPL35A, MRPS2, MRPS21, RPSA, MRPS6, ZAR1, EEF1A1, LOC704394, RPS29, RPL27A, FAU, RPL29, RPL28, LOC703365, RPS24
GOTERM_BP_DIRECT	GO:0006260~DNA replication	17	1.33648	1.17094e-05	STN1, RTEL1, MCM7, LIG1, RFC2, LIG3, LRWD1, POLA2, RECQL5, CHAF1A, ORC1, GRWD1, ORC2, E4F1, MCM5, POLL, SSBP1
GOTERM_BP_DIRECT	GO:0048025~negative regulation of mRNA splicing, via spliceosome	8	0.628931	1.42572e-05	PTBP1, HNRNPK, U2AF2, C1QBP, RBM42, SAP18, SRSF7, SRSF9
GOTERM_BP_DIRECT	GO:0051301~cell division	26	2.04403	0.000419366	ANAPC13, CDCA5, CDCA7L, CCNF, VPS4A, GNAI3, NCAPH, BABAM1, CCNB2, SYCE1, FSD1, CENPT, NUDC, LIG1, ANAPC7, PLK1, CDC6, CHFR, CDC25B, INCENP, CKS2, KIF2C, ATXN10, LAMTOR1, ZNF830, ANAPC2
GOTERM_BP_DIRECT	GO:0008380~RNA splicing	17	1.33648	0.000462735	RBM38, HSPA8, DDX5, SF3A2, TAF15, FUS, CCAR2, PQBP1, PTBP1, HNRNPK, PRPF18, PUF60, DDX39B, LOC106992427, U2AF2, SNRPA, SUGP1
GOTERM_BP_DIRECT	GO:0006281~DNA repair	22	1.72956	0.00131344	RFC5, RTEL1, LIG1, CENPX, RFC2, MGMT, PNKP, LIG3, KIF22, PRPF19, DDB2, DDB1, BABAM1, ALKBH3, RECQL5, CHAF1A, RUVBL2, ERCC2, MMS19, POLL, DMAP1, NOP53
GOTERM_BP_DIRECT	GO:0002181~cytoplasmic translation	13	1.02201	0.00189638	RPL35A, RPSA, RPL9, GTPBP1, MRPL2, RPS29, LOC704083, DRG1, LOC702723, RPL38, RPL29, RPL18, RPL17
GOTERM_BP_DIRECT	GO:0050727~regulation of inflammatory response	12	0.943396	0.00222097	ABHD12, NLRP8, NLRP9, AKNA, NLRP7, SETD6, NLRP5, STK39, NLRP2, GGT1, DAGLB, RELA
GOTERM_BP_DIRECT	GO:0000398~mRNA splicing, via spliceosome	19	1.49371	0.00289836	SF3B3, LOC114670528, GPKOW, NCBP2, LOC719351, PRPF19, ESS2, LSM2, XAB2, RNF113A, DDX39B, LOC106992427, HNRNPA2B1, SNRPA1, TXNL4A, SNRPC, SRSF7, SNRPA, LOC114672822
GOTERM_BP_DIRECT	GO:0006457~protein folding	16	1.25786	0.00381472	TRAP1, HSP90AA1, NUDC, PDRG1, NUDCD3, DNAJA4, DNAJA3, CDC37, DNAJB11, PPIF, PFDN1, CALR, FKBP9, PPIB, PFDN6, CCT5
GOTERM_BP_DIRECT	GO:0006099~tricarboxylic acid cycle	8	0.628931	0.00447398	FH, PDHA1, LOC701966, IDH3G, IDH2, OGDHL, ACO2, SDHA
GOTERM_BP_DIRECT	GO:0007017~microtubule-based process	7	0.550314	0.00527977	TUBB8, DCTN2, SRRD, TUBD1, DYNLL1, TUBA4A, LOC722862
GOTERM_BP_DIRECT	GO:0032981~mitochondrial respiratory chain complex I assembly	10	0.786164	0.00538137	NDUFAF8, COA1, DMAC2, NDUFB11, NDUFA2, ACAD9, NDUFA10, BCS1L, FOXRED1
GOTERM_BP_DIRECT	GO:0000079~regulation of cyclin-dependent protein serine/threonine kinase activity	7	0.550314	0.00628624	CDKN2D, CCNB2, CCNJ, CCNH, CCNF, CCNI2, CNPPD1
GOTERM_BP_DIRECT	GO:0071391~cellular response to estrogen stimulus	5	0.393082	0.0067189	BCAS3, WBP2, ARID5A, RARA, PELP1
GOTERM_BP_DIRECT	GO:0006270~DNA replication initiation	6	0.471698	0.00707031	POLA2, MCM7, ORC1, ORC2, MCM5, CDC6
GOTERM_BP_DIRECT	GO:1903898~negative regulation of PERK-mediated unfolded protein response	4	0.314465	0.00841724	DDRGK1, AKT2, NCK2, NCK1
GOTERM_BP_DIRECT	GO:0006914~autophagy	13	1.02201	0.00926293	BCAS3, CALCOCO2, AMBRA1, VAMP8, MAP1LC3A, ATG101, TOLLIP, LOC114675553, PLEKHM1, ATG4B, SQSTM1, ATG7, RNF185
GOTERM_BP_DIRECT	GO:0001825~blastocyst formation	5	0.393082	0.0111501	RRP7A, PNLDC1, WDR74, MFN2, MATR3
GOTERM_BP_DIRECT	GO:0022900~electron transport chain	5	0.393082	0.0111501	POR, NDOR1, FDX2, SDHA, THAP11
GOTERM_BP_DIRECT	GO:0006744~ubiquinone biosynthetic process	5	0.393082	0.0139324	COQ4, COQ2, FDXR, PDSS1, COQ7
GOTERM_BP_DIRECT	GO:0015937~coenzyme A biosynthetic process	4	0.314465	0.0165506	PANK4, PPCS, COASY, PPCDC
GOTERM_BP_DIRECT	GO:0071897~DNA biosynthetic process	4	0.314465	0.0165506	SMPD3, LIG1, LIG3, TK1
GOTERM_BP_DIRECT	GO:0006397~mRNA processing	17	1.33648	0.0170273	RBM38, DDX5, SF3A2, AKAP8L, SRRT, SUPT4H1, PQBP1, PTBP1, HNRNPK, PRPF18, PUF60, DDX39B, LOC106992427, U2AF2, RBM23, SNRPA, SUGP1
GOTERM_BP_DIRECT	GO:0045454~cell redox homeostasis	6	0.471698	0.0171186	EGLN2, GPX1, GLRX3, PRDX1, SELENOT
GOTERM_BP_DIRECT	GO:0045815~transcription initiation-coupled chromatin remodeling	7	0.550314	0.01754	LOC106992427, WBP2, PABPC1L, SIRT7, SGF29, MEN1, GLYR1
GOTERM_BP_DIRECT	GO:0036066~protein O-linked fucosylation	3	0.235849	0.0181621	POFUT2, SLC35C2, SLC35C1
GOTERM_BP_DIRECT	GO:0030043~actin filament fragmentation	3	0.235849	0.0181621	WDR1, CFL2, CFL1
GOTERM_BP_DIRECT	GO:0016236~macroautophagy	7	0.550314	0.0198503	ILRUN, MAP1LC3A, EI24, VPS37B, PIM2, UBXN6, ATG5
GOTERM_BP_DIRECT	GO:0031397~negative regulation of protein ubiquitination	8	0.628931	0.0206589	UBXN1, U2AF2, PINX1, RPS3, SIRT7, SENP2, SQSTM1, ATG5
GOTERM_BP_DIRECT	GO:0050862~positive regulation of T cell receptor signaling pathway	5	0.393082	0.0207228	RPS3, PRKD2, ADA, RELA, NECTIN2
GOTERM_BP_DIRECT	GO:0034497~protein localization to phagophore assembly site	5	0.393082	0.0207228	ATG16L1, LOC114675553, MFN2, ARFIP2, ATG4B
GOTERM_BP_DIRECT	GO:0000244~spliceosomal tri-snRNP complex assembly	4	0.314465	0.0218038	LOC719351, PRPF19, AAR2, LSM2
GOTERM_BP_DIRECT	GO:0000338~protein deneddylation	4	0.314465	0.0218038	COPS5, GPS1, COPS7B, COPS7A
GOTERM_BP_DIRECT	GO:0017148~negative regulation of translation	9	0.707547	0.0223226	NANOS1, WFS1, TRIM3, SAMD4A, RPS3, CALR, PAIP2, TOB1, ZAR1
GOTERM_BP_DIRECT	GO:0050821~protein stabilization	17	1.33648	0.0234395	HSP90AA1, WFS1, CCNH, TESC, HIP1R, MUL1, TMC6, BAG6, AKT2, CDC37, RABL3, CALR, PIM2, PPIB, NOP53, CCT5, TRIM44
GOTERM_BP_DIRECT	GO:0044772~mitotic cell cycle phase transition	5	0.393082	0.0247592	CCNB2, CCNJ, CCNF, CCNI2, CKS2
GOTERM_BP_DIRECT	GO:0072332~intrinsic apoptotic signaling pathway by p53 class mediator	5	0.393082	0.0247592	WWOX, DDX5, MYBBP1A, ERCC2, BOK
GOTERM_BP_DIRECT	GO:0006626~protein targeting to mitochondrion	4	0.314465	0.0278578	BCAP31, TOMM34, AIP, MFN2
GOTERM_BP_DIRECT	GO:0009298~GDP-mannose biosynthetic process	3	0.235849	0.0291289	GMPPB, PMM1, PMM2
GOTERM_BP_DIRECT	GO:1901030~positive regulation of mitochondrial outer membrane permeabilization involved in apoptotic signaling pathway	3	0.235849	0.0291289	ATP5IF1, HIP1R, BOK
GOTERM_BP_DIRECT	GO:0051081~nuclear membrane disassembly	3	0.235849	0.0291289	DCTN1, AKAP8L, PLK1
GOTERM_BP_DIRECT	GO:0006303~double-strand break repair via nonhomologous end joining	6	0.471698	0.0337966	XRCC6, PSMD14, PNKP, POLL, CYREN, PRPF19
GOTERM_BP_DIRECT	GO:0015908~fatty acid transport	6	0.471698	0.0337966	LYPLA1, SLC25A17, FABP5, GOT2, LOC106995978, SLC27A5
GOTERM_BP_DIRECT	GO:0007076~mitotic chromosome condensation	4	0.314465	0.0347079	NCAPH2, CDCA5, AKAP8L, NCAPH
GOTERM_BP_DIRECT	GO:0002218~activation of innate immune response	6	0.471698	0.0380215	HSP90AA1, XRCC6, LOC106992427, NONO, MATR3, PQBP1
GOTERM_BP_DIRECT	GO:0042274~ribosomal small subunit biogenesis	7	0.550314	0.0419024	FBL, EMG1, RPS7, LOC706087, UTP18, RPS12, NOL6
GOTERM_BP_DIRECT	GO:0051646~mitochondrion localization	3	0.235849	0.0420544	MFN2, MUL1, PLIN5
GOTERM_BP_DIRECT	GO:0098780~response to mitochondrial depolarisation	3	0.235849	0.0420544	GPS2, AMBRA1, SQSTM1
GOTERM_BP_DIRECT	GO:0010833~telomere maintenance via telomere lengthening	3	0.235849	0.0420544	STN1, RAD51, TERF2IP
GOTERM_BP_DIRECT	GO:1904294~positive regulation of ERAD pathway	4	0.314465	0.0423412	BCAP31, BAG6, WFS1, SGTA
GOTERM_BP_DIRECT	GO:0055088~lipid homeostasis	6	0.471698	0.0425549	ADCK1, ABCB4, SURF4, CLN8, USF1, PNPLA2
GOTERM_BP_DIRECT	GO:0006406~mRNA export from nucleus	6	0.471698	0.0425549	NXF1, CHTOP, NXT1, DDX39B, NCBP2, HNRNPA2B1
GOTERM_BP_DIRECT	GO:2000042~negative regulation of double-strand break repair via homologous recombination	5	0.393082	0.045373	RECQL5, FBH1, C1QBP, PLK1, SENP3
GOTERM_BP_DIRECT	GO:0007283~spermatogenesis	22	1.72956	0.045521	NDC1, BCAP31, YIPF1, SPATA6L, MYCBP, GPX4, ODF2, MEA1, RAD23B, DPCD, BAG6, RGS2, TMEM203, PNLDC1, RARA, PGM3, TYRO3, SNRPA1, LRRC8A, PAIP2, REC114, RNF185
