# Supplementary material
Source: Research Square preprint supplement (doi:10.21203/rs.3.rs-7771199/v1)
Supplement: Supplementary file 8 [file 74e81d60c08ce933f22ed410.xlsx]

## Sheet: Distinct patterns of mRNA 
Distinct patterns of maternal mRNA from GV to MII
Group 1	Group 2	Group 3	Group 4
ADH5	IFI27	S100A10	A2ML1
ATN1	ACOT13	TMSB10	A4GALT
C12H2orf76	ADNP2	CST3	AACS
C7H14orf28	IFI27L2	TIMP1	AARS
CTSA	AGAP3	TUBB	AATF
COL6A3	EMP3	ACTR3B	ABCA15
RGCC	ARFRP1	MDK	ABCB6
CREB3L1	ARHGEF10L	THBS1	ABCB7
CRKL	HERPUD1	MAGED2	ABCD1
DBR1	MCFD2	CRHBP	ABHD11
DPPA3	ASGR1	GPX3	ABHD13
EPHX1	MYL6	AP4B1	ABHD16A
FAM135A	ATP5MPL	APIP	ABHD17B
FAM161B	ATRAID	HTRA1	ABHD4
FGF12	P4HA2	ARPC4	ABI2
FKBP1A	CTSL	ASS1	ABRAXAS1
SPTSSA	B3GLCT	ATF1	ABTB2
GPI	C14H11orf49	ATG10	ACADL
WASF1	C14H11orf98	SOX4	ACAT2
PSMA5	C1H1orf21	FNDC3A	ACLY
LTA4H	C5H4orf48	FKBP5	ACOT4
RABGGTB	C8B	BARX1	ACP5
PSMD1	HNRNPAB	BAZ1A	ACSL1
TRIM21	ALG5	BCCIP	ACTR3
RNF10	CBY3	FABP3	ADAMTS17
CLCN5	MBNL1	BOD1	ADCK1
HDAC1	ELOB	BRD4	ADCY5
LAPTM4A	MIF	BRD7	AGT
HIST1H1A	YBX3	BRI3	AHCY
TFAP4	CCNQ	C11H12orf76	AIDA
SCYL2	EIF4EBP1	C14H11orf74	AKAP10
PPP6C	TXNIP	C19H19orf54	AKIRIN1
SEC24A	GNPTAB	C2CD3	AKR1B1
BUD13	CDT1	RAB13	ALDH2
STOML3	RPL34	C6H5orf63	FOS
SLC19A2	CENPW	CACTIN	ALG6
IQGAP1	SRSF2	CASC4	AMZ2
PIAS1	CLN6	CBLB	ANAPC4
ZNF674	CD63	CBLL1	ANAPC5
USP10	COX19	CCDC173	ANKRD13A
SLC4A4	COX20	CCDC34	ANKRD27
UBIAD1	CPB2	CCDC50	ANKRD42
ATF2	CCNC	CCNG2	ANKRD45
RIOK3	CHCHD1	CCNI	ANKRD7
DENND1C	CTDNEP1	CCNK	ANKS3
HMG20A	CTHRC1	CDC14B	ANXA9
TNIK	CTNNBIP1	CDC42BPB	AOX1
UFM1	NDUFAF3	CDH3	AP1G1
LTN1	COPRS	CEBPZ	AP1M1
LITAF	DCAF15	CENPA	AP2M1
MOSPD2	DCTN3	CENPF	AP3M1
LOC100430358	HYAL2	CERS2	AP3S2
LOC106992808	SERPINI1	CFAP77	APBA2
LOC106993227	TIMM29	CHCHD8	APLF
LOC106994319	KRAS	CHIC1	APLP2
LOC106994331	MKX	CIAO2B	APMAP
LOC106994695	DPM3	CIB1	APTX
LOC106995121	DTNBP1	CKAP2L	ARAF
LOC106995580	MT3	BZW1	ARFGAP3
LOC106995785	TIMM8B	CNOT9	ARG2
LOC106996082	ENKD1	CNTRL	ARHGAP1
LOC106997235	JPH1	HNRNPH1	PPA1
LOC106998291	MS4A4A	CREB3L2	ARHGAP8
LOC106998958	FAM120AOS	CRISPLD2	ARHGEF33
LOC106999065	ATF4	RAB31	CCT7
LOC106999945	FBXW4	CRLS1	ARL3
LOC107000705	WWC3	CSNK2A2	ARL6IP1
LOC107000745	FMC1	CTDSPL	ARMC6
LOC114669760	TAGLN2	CYP2F1	ARNT
LOC114669819	CHCHD5	DAZAP2	ARNTL2
LOC114672333	GATD3A	PPP3CA	ASAH2
LOC114673439	GTPBP8	DCBLD2	ASCC1
LOC114674046	GXYLT1	RAPGEF2	ASCC2
LOC114674224	H2AFY	DDX55	ASH2L
LOC114674302	HABP4	DENND1A	ASNSD1
LOC114675532	IFNL3	DNAJC19	ASPSCR1
LOC114675733	IL16	TSPAN13	ASRGL1
LOC114676632	ING1	DPY30	ATAD1
LOC114676751	KBTBD3	DROSHA	ATG101
LOC114676793	KRT10	TRA2A	ATG14
LOC114677671	KRTCAP2	RPS14	ATG16L1
LOC114679091	DERL3	DUSP22	ATG16L2
LOC114680194	LOC100427837	EAF1	ATG4A
LOC693803	LOC100430352	RANBP1	ATG9A
LOC695072	LOC100430669	EIF5A	ATMIN
LOC695959	LOC106992862	ELK3	ATP1B3
LOC696610	LOC106993224	EMC4	ATP5F1A
LOC696872	LOC106993307	EMILIN2	ATP5F1B
LOC697721	LOC106993778	RBMS1	ATP6AP2
LOC703832	LOC106994109	ENTR1	CDK4
LOC706575	LOC106994800	APPBP2	ATP6V0C
LOC706715	LOC106996147	EPC2	ATP6V1C1
LOC706790	LOC106997203	ERICH1	ATP6V1G1
LOC709254	LOC106997935	ETHE1	ATP8A2
LOC709583	LOC106999717	EXOSC7	AUP1
LOC712661	LOC107000036	EXOSC9	AURKB
LOC715616	LOC107000414	FADS2	RNF149
LOC717340	LOC107000687	FAM120B	GEM
LOC717494	LOC109910387	FAM127C	BCAP29
LOC719221	LOC114670854	FAM177A1	BCAR3
OXNAD1	LOC114670998	MAPRE1	BCAS3
UBE2Q2	LOC114671034	BCL11A	BCKDHA
LRRTM4	LOC114671351	FAM71E1	BCL7B
ZNF45	LOC114671517	IGFBP2	BCS1L
YIPF5	LOC114671899	ARL6IP5	BDH2
SECISBP2	LOC114672254	FBLN7	BHLHB9
MAD2L1	LOC114672305	FAM178B	BIN2
LTV1	LOC114672439	FBXL6	BIRC5
TRIM36	LOC114672628	FBXO43	BLMH
UBLCP1	LOC114672677	TMTC3	BLOC1S2
KPNA7	LOC114672706	FGFR1OP	BLZF1
NEDD1	LOC114672805	FMR1	BMP15
NOP2	LOC114673092	FNDC3B	EED
SERINC1	LOC114673476	FRAT2	BNIP3
TPX2	LOC114673856	FTHL17	KTI12
ARHGAP18	LOC114674419	GAL	BOLA3
PRPF3	LOC114674787	GATAD2B	BORCS7
NMD3	LOC114675521	GLS2	BPIFB2
CCR7	LOC114675522	HSPB1	BRAF
PTPRK	LOC114675575	GNA11	BROX
TRMT5	LOC114675582	RNF175	BTG2
CHAMP1	LOC114675764	GNB2	BTRC
HAUS4	LOC114675912	MIS18A	BUB1
METTL17	LOC114675950	RBM41	C10H20orf197
ZNF143	LOC114676367	GPATCH8	C11H12orf29
FBXO30	LOC114676471	GPC5	C11H12orf49
MINPP1	LOC114677460	CDC26	C11H12orf74
LRRC40	LOC114677772	RIOK1	C11H12orf75
MOB4	LOC114678824	ACTR6	C13H2orf15
GLDC	LOC114678993	RASSF3	C15H9orf129
TBC1D31	LOC114679410	PDE7A	C15H9orf153
NUP88	LOC114680233	CBY1	C15H9orf78
BACH1	LOC114680291	GSR	C16H17orf53
DUSP18	LOC114680325	CALM1	C16H17orf58
MFN1	LOC114680572	CKAP2	C18H18orf25
WDR75	LOC693664	COMMD6	C18H18orf32
MTHFD2	LOC696463	HIGD1A	C19H19orf47
SKP2	LOC696504	HIGD2A	C1H1orf109
ASF1B	LOC697761	HILPDA	C1H1orf112
PACRG	LOC700331	HINT1	C1H1orf146
PIGA	LOC701223	ABI3BP	C1H1orf174
SPATA22	LOC701369	HIST1H3D	C20H16orf70
MYOCD	LOC701909	KLHDC3	C20H16orf74
NUP35	LOC704066	UBE2T	C2CD6
WEE2	LOC705126	HNRNPL	C2H3orf38
NUP160	LOC707227	HOMER2	C3H7orf25
CDC45	LOC709495	HOXA7	NONO
GABRR3	LOC710317	CWC22	C4H6orf120
CXCR2	LOC711062	HSF2BP	C4H6orf203
MTPAP	LOC720019	ARHGAP19	C6H5orf58
NETO1	LOC720717	PNPLA4	C8H8orf76
EML6	LOC720839	KCTD1	C9H10orf25
IFRD1	LSM4	IL2RG	C9H10orf82
MELK	MALSU1	IL4	C9H10orf88
LRRC17	MAPKAPK2	SNX25	CAB39
NEMP1	MCOLN3	RBMX2	CACNA1C
TPD52	MDH2	DTWD1	CACNA1D
MMUT	MICOS10	ZC3H13	CACNA1I
PECR	MISP3	SMAD1	CACYBP
OTX2	MOK	TBC1D7	CALML4
FANCM	MRPL21	IRF2	CD46
CLDN12	MRPS17	EIF5B	CARS
CCDC15	MRPS26	NCOA6	CASC1
MPPE1	MT1A	PSMD9	CASP3
INCENP	ZMAT4	C5H4orf33	CASP9
ZHX2	MUC20	SF3B4	CCN1
PCSK7	MZT2B	NELFA	CBFA2T2
PDE12	NDUFA13	KBTBD4	CCDC130
PDLIM1	CDA	KDM1A	SPART
PGM2L1	NFKBIB	KDM6B	CCDC169
PHF21A	HBQ1	KIAA1755	IFI35
PLCH2	LYG1	TAX1BP1	CCDC28A
PIM2	NUDT2	ITPRID2	CCDC51
LSR	NUDT4	KIF27	CCDC90B
PPT1	OST4	STRBP	CPQ
ZNF526	GLIS2	AKIP1	ZGLP1
PSMA2	PDE9A	KLF2	CCN6
LIG3	PFDN2	KLHDC10	CCNE2
RBM45	PFDN5	TAF3	CCNH
NPM3	PHF10	KMT2B	RALGDS
RP2	PHYHD1	KMT2D	CCNL2
SLC43A2	DMWD	KRT15	CCT4
RRNAD1	POLR2F	LDB1	CCT6B
HNRNPK	POLR2G	LEF1	CD38
EDA	POMP	ANKRA2	CD40
RNF123	PPP2R5A	LENG8	CDC16
ITCH	PRCD	LEPROT	CDC42EP3
SLC31A1	PRG3	LIN7C	NOL11
SNAPC1	PPP1R3D	LOC100425804	CDCA7L
SNRNP48	PRKRIP1	LOC100427362	CDH12
MYO1C	PTOV1	LOC100427680	SLC12A4
STEAP1	PTPRE	LOC100428069	CDH8
STRAP	RAD54L	LOC100428899	CDK1
SUMO2	RHEBL1	LOC100429607	CDK5
TMEM69	RNF181	LOC100430733	CDK5RAP1
RPIA	RNF187	LOC106992792	CDKN2D
TMSB15A	RPL12	LOC106993972	C6H5orf24
TMTC2	RPL26	LOC106994178	CENPBD1
TNFAIP1	RPLP2	LOC106994418	CENPT
TUBE1	RPS11	LOC106994471	MATR3
UGDH	RXRB	LOC106994481	TPST2
WDR77	SARNP	LOC106994733	MZT1
MED25	SLIRP	LOC106994953	CERCAM
XRCC4	SLX1A	LOC106995114	B2M
ETNK1	SMARCD2	LOC106995887	STK17A
ZNF211	SMIM3	LOC106996191	SPTY2D1
ZNF343	E2F1	LOC106996630	CGRRF1
ZNF420	SRF	LOC106997009	CHCHD4
HOXB6	SSNA1	LOC106998043	BNIP2
ZNF552	STIM2	LOC106998198	CHMP1A
ZNF682	STPG4	LOC106998533	CHMP7
DCK	TCEAL2	LOC106998568	CHRNE
	RYBP	LOC106998659	EFNA3
	THAP12	LOC106998968	CISD2
	TIAF1	LOC106999570	CKS2
	TIAL1	LOC106999711	CLDN11
	TMA7	LOC107000942	RNF6
	TMEM134	LOC114669718	SLC39A7
	TMEM258	LOC114670676	TOB2
	NEK6	LOC114670878	MFSD2A
	TPRKB	LOC114670885	CLN5
	TRAPPC4	LOC114670905	CLN8
	TMEM255B	LOC114671292	CLUAP1
	RPL36	LOC114671678	C2H3orf80
	DBX1	LOC114672251	ILK
	RESP18	LOC114673167	CNNM3
	VKORC1	LOC114673183	NT5C3A
	VSTM2L	LOC114673534	CNP
	CCDC102A	LOC114674474	CNPY3
	SLC22A2	LOC114674543	CNPY4
	PTRHD1	LOC114675304	OTOP3
	HYPK	LOC114675383	COG1
	UCHL3	LOC114675501	COG6
	MAPK13	LOC114675692	COL21A1
	ZNF251	LOC114675788	COMMD8
	SSR4	LOC114675789	COPE
	GNAZ	LOC114675796	COPS2
	GGA2	LOC114676061	COPS3
	GABRB3	LOC114677510	COPS4
	LAMTOR2	LOC114677660	COQ2
	ZNF426	LOC114678374	SLC45A3
	PDXK	LOC114678443	COQ7
	TNNC2	LOC114678575	COQ8A
	NDUFB9	LOC114679023	COQ9
	SCGB1D1	LOC114679352	CRLF3
	IL17B	LOC114680324	CORO7
		LOC693699	KLC4
		LOC693947	CPHXL
		LOC694062	CPNE8
		LOC694580	CPSF3
		LOC694887	CPSF6
		LOC695463	CPVL
		LOC695663	CREB1
		LOC695929	CREB3
		LOC698256	CREG1
		LOC699756	CRNDE
		LOC700337	G3BP1
		LOC700483	GSS
		LOC701473	CRYZL1
		LOC701983	CSNK1D
		LOC702174	TBRG4
		LOC702389	MAP2K3
		LOC702760	CSTF1
		LOC702864	CSTF3
		LOC704104	SESN2
		LOC704238	CTNNB1
		LOC706970	CTNNBL1
		LOC707684	CTRB2
		LOC708443	CTSD
		LOC709671	CTSF
		LOC710137	CTU2
		LOC710961	CTXN3
		LOC712268	GANAB
		LOC713024	TSPAN31
		LOC713572	VDAC2
		LOC716879	CXHXorf40A
		LOC717434	CXHXorf40B
		LOC717626	CXHXorf56
		LOC717790	CXXC1
		LOC717831	ALDOA
		LOC718737	CYB5R4
		LOC721751	CYB5RL
		FAM222B	CYCS
		ZSCAN2	CYP2C18
		YPEL5	OSGEP
		ASAP2	CYP2C9
		FAM110A	CYTH2
		TRIP11	CYTH3
		JARID2	DYNC1H1
		OIP5	MMP19
		CDCA3	DIPK2A
		CCDC66	CRIM1
		MAGOH	DCAF13
		CEP152	SDC2
		MAN2A1	DCDC1
		SMAGP	DCLK1
		MANF	TMEM263
		RBBP7	DCPS
		MAP1B	UBE2E2
		MAP2K1	DDB2
		CACNG7	DDHD1
		PPWD1	DDOST
		MARCH6	DDX1
		MAZ	DDX41
		MCC	ASNS
		MCCC2	ORC4
		FOXO1	HSPA13
		CEP295	DECR2
		MCUB	PFKFB3
		DDX59	DENND2A
		INPP5E	DEPDC1B
		ASCC3	NAA25
		FAM133B	DERL1
		METTL21A	SARAF
		PRDM2	DGAT2
		MFAP2	DGLUCY
		PAXIP1	PRKAG2
		MITD1	DHFR
		CDC20	PIGT
		EMX1	DHX16
		GCC2	DHX40
		MORF4L1	DIAPH1
		MOSPD3	DISP1
		MPHOSPH8	DLEC1
		KIF18A	DLGAP4
		MRPS14	RRP1B
		MRTFA	DLX6
		MRTO4	DMAC2
		GINS3	AQP3
		BLCAP	ICOSLG
		MSX1	GAA
		TOX	DNAH17
		MLIP	MED9
		MYLIP	DNAJB11
		MYZAP	DNAJB6
		NAA20	DNAJB9
		NCOR1	DNAJC14
		NDRG3	DNAJC18
		NDUFA6	DNAJC5G
		NDUFB1	DND1
		NEO1	DOHH
		UHRF1	LASP1
		NFAT5	KDM5B
		GPHA2	DOLK
		IL5RA	DOLPP1
		NOL4	DPEP3
		PTRH2	NMT2
		NOP10	DPH7
		ASMT	DCAKD
		NUCKS1	DRAM2
		NUDCD2	FBXL12
		ODC1	DRC1
		OR5A2	DRP2
		PABPC1	DSG2
		PABPC4	DSTN
		PARP12	DTD1
		CD177	DTD2
		PCBP1	ZNF7
		PCBP2	DUS3L
		PCGF2	DUSP11
		CPLX4	TIA1
		PFDN4	DUSP23
		PFN1	DUSP3
		PHC2	SPNS1
		PHC3	DXO
		PHF5A	ANXA2
		PIM3	DYNC2LI1
		PIP5K1A	NUAK2
		AGPAT3	DYNLT3
		ACVR2B	DYRK3
		POLR3GL	MOCS1
		PPP1R35	EARS2
		RALBP1	ECHDC1
		MAK	ECHDC2
		RBBP5	ECHS1
		RBP1	EEF1AKMT2
		RBPMS	TRIM27
		RFESD	EEF2K
		ILDR2	EGFL6
		RNPC3	EID3
		RPA3	EIF2AK2
		RPL10	EIF2D
		RPL26L1	EIF2S1
		RPL27	SCP2
		RPL30	EIF3J
		RPLP1	EIF3L
		RPS15A	ELAC2
		RPS16	ELK1
		RPS19	TMEM165
		RPS2	ARMC10
		RPS21	R3HCC1L
		RPS23	ELOC
		RRP15	ELP2
		RSBN1L	ELP3
		RSL1D1	VMP1
		RTF1	EMC2
		SALL2	EMC3
		SAMD1	ZNF71
		SAP30	EMP2
		SATB1	LATS1
		SCARB1	ENOPH1
		SCMH1	ENOX1
		SDCCAG8	ENTPD4
		SEC61B	EOMES
		SEC62	PRSS23
		SEH1L	EPB41L5
		SERF2	EAF2
		SERINC5	ERAL1
		SET	DPM1
		SFPQ	ACBD6
		MAOA	ERCC5
		SH3KBP1	ERGIC3
		SIN3A	ATXN10
		SIX2	ERP29
		SKOR1	ESD
		SLC25A5	ESYT3
		SLC35D1	TTC27
		SLC39A4	ZNF217
		SLC48A1	ETV6
		SMARCD1	EVC2
		SNAPIN	PYGB
		PGAP1	EXOSC8
		SNRPF	EXTL2
		SON	CDKN2AIP
		RCC2	F10
		SPRED2	F11R
		NHSL1	FAH
		SRRM1	FAM118B
		SSBP3	FAM122C
		TP53	FAM126B
		SUB1	FAM156B
		SYCE3	FAM174A
		BICC1	FAM185A
		DCUN1D4	TPI1
		TAOK1	FAM200A
		CAMSAP1	FAM210A
		TBL1XR1	FAM216A
		TBP	P3H1
		TCF3	OSGIN2
		TCTEX1D2	FAM234A
		TIGAR	FAM45A
		TJP1	FAM53A
		ATP9A	NUCB1
		TM2D1	FAM83D
		TMEM129	FAM89B
		TMEM35B	EIF5A2
		TMSB4X	FANCF
		TNFSF12	FANCG
		FER	FANCI
		R3HDM2	FARS2
		ZFHX3	FARSB
		TRAPPC2	FASTKD2
		TRIOBP	NEURL1B
		TRMT112	FBLN5
		TMEM164	RAP2B
		UBA6	FBXL2
		UPF1	POLDIP2
		USP13	EIF4A1
		USP25	FBXO42
		WARS	FBXO8
		WASF2	FCF1
		CPNE2	FCGRT
		YAF2	TCTA
		YME1L1	ABHD10
		YWHAB	BAX
		ZBTB44	FGD4
		CELF1	COTL1
		KRR1	FHIT
		IMMP1L	DUSP2
		IL23A	FKBP4
		PIGF	NPAS1
		ZCCHC3	SNX10
		HMG20B	FLOT2
		ZDHHC18	VPS18
		BRDT	PRKAB1
		PSMB6	ST3GAL4
		C13H2orf68	CDC42EP4
		PRDX3	FNDC10
		MTR	FNTA
		DNAJC28	FNTB
		PARD6B	FOCAD
		CCDC13	ADGRG1
		STARD7	METTL1
		ZNF260	ADAP1
		PSMB4	FPGS
		GBA	FPGT
		NPM1	FRZB
		LSM7	FSD1
		MFSD14B	FSIP1
		DRAP1	WDR44
		UTRN	FUCA1
		RAP1GDS1	FUCA2
		PCID2	FUNDC1
		PDS5B	FUS
		ARV1	HSPA5
		ZNF395	DECR1
		PRKACA	FXN
		DCLK2	FXYD6
		ZNF513	G6PC3
		RMI1	G6PD
		SUDS3	TMA16
		KRT222	GAPDH
		FBXW7	GAD1
		CENPN	MCAM
		CAPZA1	GALK2
		FAM199X	GALR1
		SPTBN1	GALT
		CLIC4	DPH5
		ZNF652	GCLM
		NRAS	GCNT3
		ELF5	GDF9
		SINHCAF	GDPD4
		PLEKHA3	GDPGP1
		SH3BGRL2	GEMIN6
		ANKRD40CL	GEMIN7
		QSOX2	GEMIN8
		ERO1A	ACADVL
		RAB27B	GGACT
		ERBIN	GGH
		DCTN6	GGPS1
		TMEM254	GGT1
		STRIP2	TRRAP
		PPP1CB	GHITM
		PHLPP1	NACC2
		ATP11C	GIN1
		ZSWIM7	SULF2
			GPAA1
			TOR1AIP1
			RRP12
			TMX3
			GLMN
			GLO1
			GLRX
			GLRX3
			NABP1
			GINS2
			GNA14
			GNAI3
			GNL3
			GNPDA2
			GNPNAT1
			CNTN6
			CDC25C
			ARRDC2
			SPATA7
			TRPV6
			GPATCH3
			CNTN5
			GPC3
			GPKOW
			GPR107
			PTBP2
			TEX30
			MXD1
			OSCP1
			CHST4
			ZNF830
			ATG5
			GPR89A
			GPS2
			CCNB2
			GPSM2
			MBIP
			GPT2
			YARS2
			GPN3
			GDI2
			SLC35A5
			SLC6A16
			GRIN2A
			GRIN2B
			DUSP19
			GRM8
			KLHDC4
			BANP
			GSDME
			GSTK1
			GTF2A1L
			GTF2H2
			GTF3A
			GTF3C1
			OSBPL10
			GYG1
			HACD3
			HADHA
			HADHB
			ZNF473
			HARS
			HARS2
			FANCL
			HAT1
			HAUS1
			HAUS2
			HAUS3
			ZAR1L
			HCFC1R1
			HCRTR2
			HDAC2
			HDAC8
			HDC
			ZCWPW2
			HDHD3
			HHAT
			HIBCH
			CRNKL1
			NUBP2
			RGS2
			HIST1H2AC
			GFM2
			AKR1E2
			HMGCL
			NOB1
			HMGXB3
			C13H2orf74
			HNRNPH3
			HNRNPLL
			HPS3
			PIH1D2
			HSBP1L1
			PEX11A
			HSD17B4
			HSF2
			HSPA14
			HSPA4L
			SLC7A6OS
			HSPBP1
			HSPD1
			PPEF1
			BET1
			HTRA2
			HUS1
			HVCN1
			SYCP3
			HYOU1
			IAH1
			TRAIP
			IDH2
			IDH3A
			WDR45B
			IDI1
			SLC3A1
			IER2
			IFNAR2
			TTC9C
			IFT172
			IFT46
			IFT52
			IFT88
			NLRP8
			PPP2R2A
			MAD2L1BP
			ZCWPW1
			TTC30A
			IKBKB
			UIMC1
			EPHB4
			IL10RB
			IL13RA1
			ZNF691
			TLE2
			IL4I1
			DDX50
			TUBD1
			ANKS4B
			IMMT
			IMPACT
			GORAB
			INCA1
			INIP
			INKA1
			IL1R2
			TIMD4
			TRIML2
			INTS4
			KPNA2
			IP6K2
			ZNF684
			CD36
			IQSEC3
			IST1
			UBA5
			ITGA4
			PPP2R2B
			ITM2C
			CAST
			ITPR3
			JAG2
			JAGN1
			CZIB
			JMJD6
			JMJD7
			JMJD8
			ZNF571
			KARS
			KATNAL1
			KATNB1
			KATNBL1
			KCMF1
			KCNJ1
			HBP1
			GTF3C3
			SETDB2
			CERS5
			KHDC1L
			KHDC3L
			KIAA0319L
			KIAA0930
			KIAA1143
			KIF1BP
			KIF22
			MAPK10
			MTFR2
			NLRP14
			KLF5
			KLHL15
			KLHL24
			KLHL32
			KLHL36
			F2
			ZFP82
			KLK8
			KMT5B
			KPNA1
			ATG3
			KRBOX1
			KRBOX4
			KRT18
			KRTAP19-3
			KIF2C
			KXD1
			LACC1
			SEC23B
			LAMB4
			LANCL1
			LANCL3
			LARS
			LAS1L
			LCMT1
			LCMT2
			LCN8
			MS4A10
			LDHA
			LDHAL6A
			LDOC1
			ZNF607
			ZNF658
			BRINP1
			SVIP
			LHFPL2
			LIAS
			MIS12
			LIN9
			LIPT1
			LIPT2
			THEG
			SCFD1
			MACC1
			LOC100423439
			LOC100423625
			LOC100423656
			LOC100424003
			LOC100424689
			LOC100424733
			LOC100424859
			LOC100424869
			LOC100425060
			LOC100425173
			LOC100425528
			LOC100425856
			LOC100425937
			LOC100426750
			LOC100426844
			LOC100427042
			LOC100427840
			LOC100427976
			LOC100428188
			LOC100428608
			LOC100429190
			LOC100429260
			LOC100429350
			LOC100429403
			LOC100429772
			LOC100430473
			LOC100430500
			LOC100430850
			LOC100499503
			LOC106992348
			LOC106992358
			LOC106992395
			LOC106992625
			LOC106992665
			LOC106992860
			LOC106992896
			LOC106993019
			LOC106993025
			LOC106993087
			LOC106993281
			LOC106993424
			LOC106993426
			LOC106993458
			LOC106993503
			LOC106993529
			LOC106993729
			LOC106993782
			LOC106993809
			LOC106993843
			LOC106993851
			LOC106993906
			LOC106993939
			LOC106993965
			LOC106994057
			LOC106994123
			LOC106994202
			LOC106994346
			LOC106994381
			LOC106994392
			LOC106994438
			LOC106994468
			LOC106994480
			LOC106994488
			LOC106994511
			LOC106994555
			LOC106994581
			LOC106994583
			LOC106994592
			LOC106994717
			LOC106994778
			LOC106994850
			LOC106994924
			LOC106995085
			LOC106995105
			LOC106995159
			LOC106995206
			LOC106995210
			LOC106995286
			LOC106995403
			LOC106995501
			LOC106995552
			LOC106995638
			LOC106995779
			LOC106995795
			LOC106995906
			LOC106995931
			LOC106996033
			LOC106996149
			LOC106996367
			LOC106996396
			LOC106996398
			LOC106996415
			LOC106996456
			LOC106996579
			LOC106996686
			LOC106996807
			LOC106996859
			LOC106996872
			LOC106997094
			LOC106997152
			LOC106997205
			LOC106997229
			LOC106997241
			LOC106997267
			LOC106997295
			LOC106997433
			LOC106997514
			LOC106997517
			LOC106997596
			LOC106997680
			LOC106997731
			LOC106997738
			LOC106997747
			LOC106997847
			LOC106998022
			LOC106998044
			LOC106998272
			LOC106998274
			LOC106998315
			LOC106998347
			LOC106998434
			LOC106998452
			LOC106998573
			LOC106998673
			LOC106998893
			LOC106998978
			LOC106999016
			LOC106999090
			LOC106999116
			LOC106999161
			LOC106999265
			LOC106999324
			LOC106999441
			LOC106999565
			LOC106999574
			LOC106999621
			LOC106999639
			LOC106999673
			LOC106999955
			LOC106999956
			LOC106999967
			LOC106999992
			LOC107000022
			LOC107000046
			LOC107000048
			LOC107000088
			LOC107000153
			LOC107000324
			LOC107000357
			LOC107000371
			LOC107000395
			LOC107000611
			LOC107000632
			LOC107000678
			LOC107000685
			LOC107000717
			LOC107001006
			LOC107001038
			LOC114669720
			LOC114669721
			LOC114669745
			LOC114669750
			LOC114669790
			LOC114669832
			LOC114669837
			LOC114669849
			LOC114669852
			LOC114669856
			LOC114669869
			LOC114669887
			LOC114670036
			LOC114670040
			LOC114670049
			LOC114670057
			LOC114670145
			LOC114670450
			LOC114670521
			LOC114670545
			LOC114670778
			LOC114670804
			LOC114671066
			LOC114671373
			LOC114671412
			LOC114671475
			LOC114671522
			LOC114671705
			LOC114671826
			LOC114671876
			LOC114672248
			LOC114672264
			LOC114672286
			LOC114672324
			LOC114672410
			LOC114672447
			LOC114672450
			LOC114672574
			LOC114672652
			LOC114672685
			LOC114672701
			LOC114672813
			LOC114672822
			LOC114672837
			LOC114672847
			LOC114672856
			LOC114673018
			LOC114673023
			LOC114673026
			LOC114673461
			LOC114673494
			LOC114673526
			LOC114673566
			LOC114673699
			LOC114673717
			LOC114673721
			LOC114673748
			LOC114673782
			LOC114673795
			LOC114673824
			LOC114673829
			LOC114674027
			LOC114674030
			LOC114674075
			LOC114674176
			LOC114674199
			LOC114674310
			LOC114675089
			LOC114675128
			LOC114675318
			LOC114675341
			LOC114675352
			LOC114675448
			LOC114675473
			LOC114675552
			LOC114675553
			LOC114675589
			LOC114675605
			LOC114675697
			LOC114675820
			LOC114675899
			LOC114675903
			LOC114675908
			LOC114675961
			LOC114675993
			LOC114676015
			LOC114676077
			LOC114676135
			LOC114676215
			LOC114676396
			LOC114676685
			LOC114676750
			LOC114676809
			LOC114676829
			LOC114676848
			LOC114676901
			LOC114676952
			LOC114676976
			LOC114676996
			LOC114677003
			LOC114677357
			LOC114677392
			LOC114677478
			LOC114677483
			LOC114677622
			LOC114677628
			LOC114677677
			LOC114677684
			LOC114678249
			LOC114678346
			LOC114678406
			LOC114678435
			LOC114678465
			LOC114678743
			LOC114678746
			LOC114678912
			LOC114678959
			LOC114679249
			LOC114679254
			LOC114679319
			LOC114679320
			LOC114679374
			LOC114679412
			LOC114679414
			LOC114679448
			LOC114679469
			LOC114679606
			LOC114679615
			LOC114680244
			LOC114680352
			LOC693272
			LOC693354
			LOC693399
			LOC693438
			LOC693477
			LOC693577
			LOC694256
			LOC694543
			LOC694684
			LOC694743
			LOC694921
			LOC695050
			LOC695122
			LOC695242
			LOC695478
			LOC695495
			LOC695703
			LOC695844
			LOC695923
			LOC695938
			LOC696103
			LOC696118
			LOC696282
			LOC696312
			LOC696393
			LOC696885
			LOC696959
			LOC696998
			LOC697254
			LOC697810
			LOC698056
			LOC698152
			LOC699117
			LOC699317
			LOC699342
			LOC699631
			LOC699655
			LOC700544
			LOC700564
			LOC700971
			LOC701052
			LOC701439
			LOC701662
			LOC701681
			LOC701808
			LOC702418
			LOC702465
			LOC702723
			LOC702875
			LOC703156
			LOC703490
			LOC703550
			LOC703700
			LOC703968
			LOC704059
			LOC704136
			LOC704173
			LOC704463
			LOC704978
			LOC705244
			LOC705400
			LOC705465
			LOC705611
			LOC705696
			LOC705884
			LOC706340
			LOC706496
			LOC706532
			LOC706619
			LOC706755
			LOC706862
			LOC706967
			LOC707215
			LOC707459
			LOC707549
			LOC707726
			LOC708096
			LOC708952
			LOC709086
			LOC709103
			LOC709146
			LOC709304
			LOC709576
			LOC710477
			LOC710661
			LOC710682
			LOC710759
			LOC710765
			LOC711295
			LOC711376
			LOC711592
			LOC711652
			LOC711872
			LOC711890
			LOC712182
			LOC712203
			LOC712533
			LOC713150
			LOC713332
			LOC713482
			LOC713490
			LOC713683
			LOC713879
			LOC714226
			LOC714656
			LOC714689
			LOC714758
			LOC715257
			LOC715684
			LOC716016
			LOC716240
			LOC716527
			LOC716882
			LOC717488
			LOC718406
			LOC718408
			LOC718462
			LOC718712
			LOC719262
			LOC719277
			LOC719811
			LOC719951
			LOC720024
			LOC720035
			LOC720055
			LOC720058
			LOC720236
			LOC720244
			LOC720251
			LOC720396
			LOC720399
			LOC720437
			LOC720574
			LOC720980
			LOC721043
			LOC722074
			LOC722786
			LOC722798
			LOC722862
			LOC723025
			LOC723047
			LOC723069
			LOXL2
			CYTL1
			LRATD2
			LRIF1
			LRP1B
			MGAT4A
			B4GALT6
			LRRC46
			MPP7
			SHCBP1L
			DNAJC1
			RIPOR2
			NEBL
			M6PR
			MAB21L2
			CEP192
			MACMULV1R-PS1053
			MACROD2
			MAD1L1
			MAEA
			PLA2G12B
			MAGOHB
			MAIP1
			MAK16
			CDC6
			C11H12orf43
			MANSC1
			MAP11
			MAP1LC3C
			MAP2K5
			MAP3K20
			MAP7D2
			SLC38A11
			TACC3
			WDR41
			HSDL2
			MARS
			MARS2
			MASP1
			MATN2
			BPNT1
			MCM3
			MCM8
			MCM9
			MCTP2
			NAA11
			CYP39A1
			ME3
			MECR
			MED11
			MED14OS
			MED17
			MED18
			MED21
			MED22
			OOSP4B
			MEIKIN
			MEIS2
			CBLN2
			MESD
			METTL18
			METTL2A
			N4BP2L2
			MFAP1
			MFF
			MFSD11
			ACE2
			DDX43
			MFSD8
			MAMDC2
			MGAT1
			SNTG1
			PEX12
			MICB
			MICU2
			AMD1
			MIER2
			PLA2G2E
			MIR147B
			MKRN1
			MKRN2
			MLKL
			MLYCD
			MOAP1
			TLCD2
			MOCOS
			ZNF233
			SQOR
			MOSPD1
			MPC1
			MPEG1
			MPHOSPH6
			UBXN11
			MRC1
			MRM1
			MROH1
			MRPL1
			MRPL10
			MRPL19
			MRPL2
			MRPL37
			MRPL38
			MRPL48
			MRPL50
			MRPS27
			JAKMIP1
			MRPS31
			MRPS35
			MRPS36
			MRPS6
			MRRF
			ABCB4
			ZNF136
			MT2A
			SPDYC
			DCT
			TAF1A
			DIRAS3
			MTMR10
			MTMR7
			MTO1
			MTRF1L
			ZNF532
			MUC16
			MUL1
			MUS81
			MVB12B
			MYBL2
			MYBPC1
			MYCBP
			ZNF266
			BBS9
			BMP5
			MYO3B
			N6AMT1
			NAA16
			CETN1
			NAA40
			NAA50
			NAA80
			EXO5
			NACA2
			NAIF1
			NAPEPLD
			NARS
			NAT1
			ZNF214
			NAXD
			NCALD
			NCAM2
			NDUFA10
			NDUFA5
			NDUFAF7
			NDUFS2
			NECAP1
			NECTIN2
			NEK10
			AGR2
			NEK2
			GARNL3
			GPR143
			EXO1
			NFKBIE
			NFS1
			NGLY1
			NGRN
			PRDM6
			NIP7
			NIPA1
			NIPSNAP1
			MDM2
			NKX3-1
			NLRP2
			FAM81A
			NLRP9
			NME4
			NMRK1
			NOA1
			NOCT
			NOP14
			MUC15
			ATP8B1
			NPRL2
			NRDC
			NSFL1C
			GLYATL3
			NT5DC2
			NTAN1
			NUBP1
			ANTXR2
			NUP133
			ECM2
			NUP50
			CC2D1B
			ANGPTL6
			LMBR1L
			SEPHS2
			TYRO3
			ODF2
			ODR4
			OGA
			OGFOD3
			DAPK3
			ERCC2
			OGT
			WFS1
			TMEM198
			OLFML1
			OMA1
			TRUB1
			RASGRP2
			OR2D3
			USF1
			PAQR7
			FBXO10
			HOXD1
			ARHGEF19
			OSBP
			TAF15
			OSER1
			AMZ1
			OTOA
			KIAA0513
			OTULIN
			OXCT1
			NKD1
			P2RX4
			CDC42EP2
			PHRF1
			DGCR8
			GSN
			GAK
			AKNA
			NADSYN1
			CSRP1
			TERF2IP
			ZNF428
			FTSJ1
			MFN2
			WDR24
			RPUSD2
			PAIP2
			PAK1
			BRMS1
			PAMR1
			SNPH
			RARA
			GEMIN4
			EOGT
			PAQR8
			CKB
			PATL2
			TAFA2
			DHX34
			SLC29A4
			PC
			APBA3
			ADAD2
			ZSCAN22
			PCCB
			MFSD13A
			REEP2
			TTC38
			IGFALS
			INTS11
			RRP8
			RANGAP1
			USP20
			POU2F3
			E4F1
			PCYOX1L
			FAM217A
			ACACB
			PCSK5
			GPR158
			B3GNT9
			PDCD10
			GRWD1
			MAP1S
			PDCD2
			PDCD6IP
			PDCL3
			NANOS1
			MICAL3
			UNC45A
			HDLBP
			PDIA4
			HIP1R
			PDPN
			TCF25
			POLL
			MPP2
			PDZD11
			RAB40B
			PDZK1
			SLC13A5
			PEBP1
			PEPD
			PER1
			PERP
			ABCF3
			PET117
			NCAPH
			ZSWIM4
			PEX19
			FAAP100
			MORC2
			RNF144A
			CPN2
			PGAM1
			TEAD3
			PGK1
			PGM1
			DDX11
			DCUN1D3
			PGS1
			KIAA0895L
			PHACTR3
			PHB
			RAB3D
			ZNF689
			GALE
			TMEM115
			SLC25A1
			PHKA2
			PHKG2
			POLA2
			PHOSPHO1
			ARID5A
			PINX1
			PHYKPL
			NOXA1
			PIGX
			HIC2
			TBC1D2
			PIGH
			PIGK
			PIGO
			PIGP
			CHD1L
			PIGY
			PIK3CB
			BOK
			ALKBH3
			HIPK4
			AMMECR1L
			WFDC2
			RPUSD1
			PIP4K2A
			PLIN5
			PISD
			PITPNC1
			RNF145
			PITRM1
			AKAP8L
			GTPBP1
			TBC1D20
			C13H2orf81
			PKM
			PKMYT1
			POLM
			PLA2G12A
			GM2A
			PLA2G15
			REL
			FA2H
			ARAP1
			ELFN2
			STK32C
			PLAA
			HSF1
			EIF2B5
			PRPF18
			ZNF14
			PLCG2
			CDCA5
			POLE
			CDX2
			PLD5
			DBF4B
			SUGP1
			PLEKHA1
			HID1
			CIDEC
			BLOC1S3
			DHDDS
			ZNF34
			PLEKHM2
			XRCC3
			PLIN3
			PLK4
			PLEKHG6
			PLPP1
			TCIRG1
			PLPP4
			S100PBP
			TICAM1
			PLTP
			CCDC22
			PLXDC1
			CLEC4G
			GRIP1
			ACTR5
			TBC1D8
			PMPCA
			PMPCB
			MEN1
			PNMA1
			IQCE
			CALR
			PNP
			HAUS5
			CSNK1G2
			POC1A
			GRIPAP1
			PANX2
			MAPK7
			STOX1
			ANKZF1
			NISCH
			ARRDC1
			POLE3
			KYAT3
			VPS11
			POLR2M
			MLST8
			POLR3E
			PWP2
			POMGNT1
			CCAR2
			PON1
			AKT2
			ATP2A3
			CPSF1
			NARF
			PPAN
			KCNT1
			MAT1A
			STIP1
			PPIC
			PPIE
			PPL
			SLC27A1
			PLEKHB1
			DUSP10
			KCNK16
			ACO2
			COQ4
			PPP1R11
			ZNF408
			NFATC1
			C7H15orf39
			PPP1R2
			TMEM74
			DCTN1
			NAT9
			KIAA1191
			AKT1S1
			EFNB1
			ZBTB17
			PPP2R3C
			TRIM13
			ADAMTSL2
			RIMS3
			PQLC2
			GMPPB
			TRIP4
			RAB6B
			PRELID1
			NLRP5
			RTL10
			PRIM1
			ZNF212
			PLEKHF1
			PRKAB2
			RBFA
			PSAP
			PRKCH
			PLEKHG5
			PRKD2
			PRKD3
			PRKRA
			ZSWIM8
			KEAP1
			RIC8A
			KLK15
			PRODH
			PPP1R3C
			CORO1C
			RFX2
			PRPF38A
			PRPF39
			GAS8
			NCK1
			ABCB9
			PRR15
			DACH2
			TBL3
			PRR5L
			PPM1G
			DCAF11
			RRP7A
			CETP
			LRRC59
			CSGALNACT1
			OGDHL
			SLC1A2
			PSEN1
			FGD3
			PSKH1
			PSMA3
			PSMA6
			PSMB3
			PLCD3
			SCAP
			PSMC1
			PSMC6
			SMTNL2
			PSMD14
			PSMD6
			DCAF4
			LETM1
			PSMF1
			PSMG1
			PSMG2
			CALCOCO1
			PTCD3
			NOP53
			BSDC1
			CNN2
			ATP6V1E1
			PTGER3
			CEP68
			UCHL1
			GYS1
			PTH2R
			HS2ST1
			CEP250
			TOP3A
			PTPN9
			DDX5
			ZNF19
			SCNN1A
			IP6K1
			SMYD4
			ACSM1
			NCLN
			PDP2
			PUDP
			PUM3
			PUF60
			PXN
			CAND2
			GNPDA1
			TRAP1
			ARHGAP30
			QRSL1
			WWP2
			SLC6A20
			WDR25
			RTF2
			USP5
			CAD
			POLR3D
			INPP5K
			RAB1A
			RAB23
			RAB2B
			RPAIN
			CDIPT
			NOP9
			GREB1L
			RAB3A
			ZNF391
			RAB3IP
			PMS2
			LDLRAP1
			RAB4B
			DCTN5
			AVL9
			PTBP1
			RIBC2
			RABGGTA
			NCKIPSD
			RAD17
			RAD51
			RAD51B
			RAD51C
			RAD51D
			RAD52
			CD82
			ATP6V1C2
			CCDC134
			ZNF337
			CEP72
			ENAH
			GPAT2
			RALGPS1
			GTF2F1
			ARHGEF3
			RANBP17
			CHPF
			TSEN54
			ABCC1
			RARS
			NPDC1
			MRPS2
			THOP1
			GRM7
			RASGRF2
			DYM
			TCEANC2
			CATSPERG
			BMP6
			ZSCAN29
			LRRC23
			VCP
			PRPSAP1
			EHD1
			DAGLB
			GRK6
			ZC4H2
			TSC2
			TCF19
			RECQL5
			RBM3
			VRK3
			RBM39
			RBM42
			VPS41
			ZPR1
			RPUSD4
			RGS19
			CHFR
			RBMX
			FRS3
			CRAT
			ADCK5
			FAM53C
			RCL1
			RCN2
			MON1A
			LRWD1
			RDH13
			RECQL
			NMRAL1
			TMEM43
			TPMT
			RPUSD3
			REEP6
			CCNF
			RELA
			RELL2
			CALM3
			RER1
			PHF8
			DRG1
			PANK4
			ATP6V1D
			RFK
			ZNF414
			SNAP47
			SMOX
			TUT1
			RGMA
			RGMB
			IL34
			CLCN4
			AAR2
			TMEM63A
			NCK2
			LRMDA
			RGS7
			GNL1
			HSPA8
			TOP3B
			VAT1
			PPP1R10
			RHOH
			ZBTB9
			CYREN
			THEM6
			RIDA
			SGTA
			ZCCHC12
			RIOX1
			SLC50A1
			SDR42E1
			PODXL
			RMDN1
			RMDN3
			RMND1
			ERMARD
			STK16
			ACOT8
			RNASEK
			RNASET2
			POLR1B
			COPS7A
			LIPM
			RNF115
			ZFAT
			FBH1
			CHCHD3
			TP53I11
			NR1I2
			CCDC12
			DDX24
			GORASP1
			RNF166
			SUV39H1
			RHBDF2
			RNF185
			LIMK2
			RNF26
			RNF31
			IVD
			MDM4
			FSTL4
			TRIM38
			RNF8
			PSD2
			CHST9
			LRCH4
			ROCK1
			ROS1
			RPA2
			RFT1
			SMOC1
			RETREG3
			RPL15
			RPL17
			SLC35B4
			SLC20A1
			DAP3
			PTPRH
			RPL7A
			ORC2
			NRBP1
			LMF2
			RPS10
			GNS
			ZNF416
			XAF1
			RPS6KA3
			RPS7
			MMS19
			ZNF614
			PSMD2
			RRAGB
			RRN3
			WDR1
			PDX1
			RSL24D1
			RSPH3
			RSPH9
			RSPO2
			FAM234B
			C12H2orf88
			AFAP1
			COL25A1
			STIMATE
			ORC1
			SLC4A2
			RUSC1
			RUVBL2
			RWDD2A
			BOP1
			RYR3
			SLC12A7
			CCDC159
			DUSP16
			PNLDC1
			ZNF398
			SAP25
			SAR1A
			SAR1B
			ACER3
			TIMELESS
			SARS
			SARS2
			DNTTIP1
			NSDHL
			ZNF774
			NEFL
			SEC16A
			DOK6
			DHX58
			SCCPDH
			SCLY
			PNPLA7
			ABRAXAS2
			CCNI2
			SCNN1G
			SCPEP1
			ELMOD3
			SCRN3
			ZNF235
			DNAJC30
			NECAB3
			BCL6B
			ZNF18
			CCDC149
			SDF4
			ANKLE2
			PROCR
			RNF182
			AP1S3
			SLCO4A1
			ZNF2
			CCNJ
[truncated: 808 more rows]

## Sheet: GO enrichment of group 1
GO enrichment of group 1 genes
Category	Term	Count	%	Pvalue	Genes
GOTERM_BP_DIRECT	GO:0000122~negative regulation of transcription by RNA polymerase II	15	6.94444	0.00498391	MYOCD, ZHX2, HDAC1, ATN1, ZNF45, PHF21A, PIAS1, MED25, STRAP, HMG20A, LOC693803, ZNF674, ZNF343, ZNF211, ZNF552
GOTERM_BP_DIRECT	GO:0051865~protein autoubiquitination	4	1.85185	0.0140118	RNF10, ITCH, LTN1, TRIM21
GOTERM_BP_DIRECT	GO:0000082~G1/S transition of mitotic cell cycle	4	1.85185	0.0153458	PPP6C, LOC114675532, PIM2, SKP2
GOTERM_BP_DIRECT	GO:0071359~cellular response to dsRNA	2	0.925926	0.0258426	PDE12, RIOK3
GOTERM_BP_DIRECT	GO:0060789~hair follicle placode formation	2	0.925926	0.0343084	EDA, HDAC1
GOTERM_BP_DIRECT	GO:0031623~receptor internalization	3	1.38889	0.0389779	ITCH, CXCR2, SCYL2
GOTERM_BP_DIRECT	GO:0006513~protein monoubiquitination	3	1.38889	0.0471903	RNF10, ITCH, TRIM21
GOTERM_BP_DIRECT	GO:0001817~regulation of cytokine production	4	1.85185	0.048652	LOC693803, ZNF45, LITAF, ZNF343

## Sheet: GO enrichment of group 2
GO enrichment of group 2 genes
Category	Term	Count	%	Pvalue	Genes
GOTERM_BP_DIRECT	GO:0006412~translation	10	4.1841	0.00184029	MRPS17, LOC720019, RPL34, RPL12, RPL36, LOC114675582, RPL26, RPS11, MRPL21, LOC114673092
GOTERM_BP_DIRECT	GO:0018279~protein N-linked glycosylation via asparagine	3	1.25523	0.0100213	OST4, LOC704066, DERL3
GOTERM_BP_DIRECT	GO:0006487~protein N-linked glycosylation	3	1.25523	0.0428562	KRTCAP2, TMEM258, ALG5
GOTERM_BP_DIRECT	GO:0019064~fusion of virus membrane with host plasma membrane	2	0.83682	0.047248	CTSL, HYAL2

## Sheet: GO enrichment of group 3
GO enrichment of group 3 genes
Category	Term	Count	%	Pvalue	Genes
GOTERM_BP_DIRECT	GO:0043066~negative regulation of apoptotic process	20	3.91389	2.30412e-05	PCID2, APIP, HSPB1, CIB1, HIGD1A, LOC698256, THBS1, FOXO1, HIGD2A, PRDX3, SON, SIN3A, LOC694887, LOC702864, TAX1BP1, YME1L1, PIM3, MSX1, TP53, LOC701473
GOTERM_BP_DIRECT	GO:0006338~chromatin remodeling	13	2.54403	0.000189161	NPM1, PAXIP1, SATB1, PCGF2, BAZ1A, GATAD2B, LOC114675501, SCMH1, SUDS3, RBBP7, JARID2, BRDT, BRD4
GOTERM_BP_DIRECT	GO:0045944~positive regulation of transcription by RNA polymerase II	32	6.26223	0.000299674	KMT2D, NFAT5, CCNK, LDB1, KDM1A, NUCKS1, LOC698256, ACTR3B, PPP3CA, PCBP1, LOC694887, LOC702864, LOC701473, SOX4, KDM6B, NPM1, NCOA6, CKAP2, MRTFA, KLF2, IL4, DRAP1, SFPQ, TBL1XR1, IL23A, IRF2, CEBPZ, TOX, TP53, PIGF, SSBP3, TAF3
GOTERM_BP_DIRECT	GO:0051301~cell division	14	2.73973	0.000667811	TIGAR, SEH1L, CDCA3, BOD1, CIB1, PDS5B, CDC14B, CDC20, PPP1CB, PARD6B, MIS18A, CDC26, OIP5, MAPRE1
GOTERM_BP_DIRECT	GO:0034080~CENP-A containing chromatin assembly	4	0.782779	0.000761121	MIS18A, CENPN, OIP5, CENPA
GOTERM_BP_DIRECT	GO:0006974~DNA damage response	12	2.34834	0.000763159	NFAT5, TIGAR, CCNK, CCDC13, RBBP5, NCOA6, FMR1, UBE2T, CSNK2A2, CIB1, HIGD1A, TP53
GOTERM_BP_DIRECT	GO:0045815~transcription initiation-coupled chromatin remodeling	6	1.17417	0.0011278	TRMT112, SMARCD1, RBBP5, DPY30, BRD7, TP53
GOTERM_BP_DIRECT	GO:0006325~chromatin organization	11	2.15264	0.0013537	MORF4L1, NCOR1, KMT2B, EPC2, NUCKS1, RTF1, RBBP7, SAMD1, JARID2, BRDT, BRD4
GOTERM_BP_DIRECT	GO:0000122~negative regulation of transcription by RNA polymerase II	29	5.67515	0.00275566	LDB1, KDM1A, UHRF1, MAZ, RTF1, RPS14, SALL2, SIN3A, SUDS3, RBBP7, HOXA7, JARID2, SAMD1, SOX4, SKOR1, MLIP, PCGF2, ACVR2B, GATAD2B, KLF2, SAP30, IL4, DRAP1, DUSP22, SFPQ, NCOR1, TBL1XR1, MAGED2, TAF3
GOTERM_BP_DIRECT	GO:0006364~rRNA processing	8	1.56556	0.00594529	EXOSC7, KRR1, EXOSC9, MRTO4, DROSHA, RPL27, NOP10, RRP15
GOTERM_BP_DIRECT	GO:0006412~translation	16	3.13112	0.00789306	LOC106996191, RPL10, MRPS14, LOC718737, RPS14, RPS16, RPS15A, RPS19, LOC100428069, RPL27, RPS2, LOC693947, LOC702760, RPS21, RPL26L1, RPS23
GOTERM_BP_DIRECT	GO:0071459~protein localization to chromosome, centromeric region	3	0.587084	0.00908396	MIS18A, BOD1, CENPA
GOTERM_BP_DIRECT	GO:0043484~regulation of RNA splicing	5	0.978474	0.0158762	HNRNPL, SON, HNRNPH1, ILDR2, BRDT
GOTERM_BP_DIRECT	GO:0032968~positive regulation of transcription elongation by RNA polymerase II	4	0.782779	0.0179623	CCNK, LDB1, BRDT, BRD4
GOTERM_BP_DIRECT	GO:0007026~negative regulation of microtubule depolymerization	4	0.782779	0.0179623	TAOK1, CKAP2, CIB1, CAMSAP1
GOTERM_BP_DIRECT	GO:0000398~mRNA splicing, via spliceosome	9	1.76125	0.0181511	SF3B4, LSM7, PHF5A, RBMX2, CWC22, TRA2A, RBM41, SNRPF, RNPC3
GOTERM_BP_DIRECT	GO:0021895~cerebral cortex neuron differentiation	3	0.587084	0.0186501	EMX1, SIN3A, TOX
GOTERM_BP_DIRECT	GO:0006397~mRNA processing	9	1.76125	0.0201443	HNRNPL, SON, CELF1, FMR1, CWC22, PABPC1, PRKACA, CBLL1, SRRM1
GOTERM_BP_DIRECT	GO:0000724~double-strand break repair via homologous recombination	7	1.36986	0.022216	MORF4L1, SFPQ, RMI1, RPA3, NUCKS1, ZSWIM7, CRLS1
GOTERM_BP_DIRECT	GO:0031398~positive regulation of protein ubiquitination	5	0.978474	0.0290053	PAXIP1, KDM1A, FBXW7, TBC1D7, CBLB
GOTERM_BP_DIRECT	GO:0002181~cytoplasmic translation	6	1.17417	0.0294091	RPS14, RPL30, RPLP1, RPS21, RPL26L1, RPS23
GOTERM_BP_DIRECT	GO:0000226~microtubule cytoskeleton organization	8	1.56556	0.0323947	FER, SON, TAOK1, MAP1B, TUBB, DCLK2, CALM1, CDC14B
GOTERM_BP_DIRECT	GO:0045579~positive regulation of B cell differentiation	3	0.587084	0.0356357	PCID2, ATP11C, IL2RG
GOTERM_BP_DIRECT	GO:0009952~anterior/posterior pattern specification	6	1.17417	0.0368285	PCGF2, SCMH1, MSX1, BARX1, HOXA7, ACVR2B
GOTERM_BP_DIRECT	GO:0006368~transcription elongation by RNA polymerase II	4	0.782779	0.0392532	PCID2, EAF1, RTF1, MYZAP
GOTERM_BP_DIRECT	GO:0048863~stem cell differentiation	4	0.782779	0.042158	PHF5A, MSX1, HOXA7, JARID2
GOTERM_BP_DIRECT	GO:1905515~non-motile cilium assembly	5	0.978474	0.0448218	C2CD3, CCDC13, MAK, MAPRE1, HIGD1A
GOTERM_BP_DIRECT	GO:0045893~positive regulation of DNA-templated transcription	12	2.34834	0.0455401	IL4, ZFHX3, MAP2K1, PCID2, MDK, IRF2, EAF1, KMT2B, MAZ, TCF3, TP53, YAF2
GOTERM_BP_DIRECT	GO:0007059~chromosome segregation	5	0.978474	0.0470786	MIS18A, CENPN, OIP5, CIAO2B, SLC25A5

## Sheet: GO enrichment of group 4
GO enrichment of group 4 genes
Category	Term	Count	%	Pvalue	Genes
GOTERM_BP_DIRECT	GO:0006355~regulation of DNA-templated transcription	152	5.54947	7.68069e-11	ZNF177, LOC719951, ZNF571, TRRAP, YEATS4, CCAR2, LOC114675589, ZNF607, ZNF846, LOC723025, KAT7, ZNF689, ZNF568, ZNF567, ZNF841, ZNF566, ZNF565, LOC695938, ZNF322, ZNF564, TMPO, ZNF684, ZNF441, ZNF18, LOC720437, ZNF19, TLE2, ZFP1, ZFP69B, ZNF10, TLE7, SAP25, PPIE, ZNF557, ZNF677, LRIF1, ZNF555, ZNF432, ZNF398, ZNF430, ZNF155, ZNF792, ZNF274, ZNF324B, LOC711295, CTR9, SUPT4H1, ZNF23, NPAS1, KRBOX4,…
GOTERM_BP_DIRECT	GO:0006281~DNA repair	45	1.64294	1.8563e-06	VCP, KLHL36, ABRAXAS1, TRRAP, MCM9, PNKP, ALKBH3, BABAM1, RECQL5, EXO1, RUVBL2, POLD2, ZNF668, KMT5B, POLL, ATRIP, TOP3B, RFC5, FANCI, LIG1, UBE2B, FANCL, TOP3A, XRCC3, RECQL, RPA2, CHD1L, ACTR8, KIF22, APTX, FANCG, INIP, DDB2, SLC25A16, LOC114672264, RAD51D, RAD51C, EID3, ERCC2, TIMELESS, NABP1, RAD17, MMS19, NOP53, RAD9A
GOTERM_BP_DIRECT	GO:0006635~fatty acid beta-oxidation	18	0.657174	3.98237e-06	ECHS1, ACAA2, HSD17B4, CROT, CPT1C, ACAT2, HADHB, HADHA, SLC25A17, BDH2, SESN2, PEX5, ECHDC1, ECHDC2, HADH, SLC27A2, ABCD1, DECR1
GOTERM_BP_DIRECT	GO:0006914~autophagy	29	1.05878	6.04594e-06	VCP, KLHL36, ABCB6, WDR45B, CALCOCO2, PHF23, ATG101, MAP1LC3C, CREG1, FUNDC1, VPS11, VPS39, BCAS3, ATG3, GABARAPL1, TMEM150B, SEC16A, LIMK2, ATG9A, FANCG, VMP1, LOC114675553, ULK3, ATG4B, ATG4A, SMCR8, SQSTM1, RNF185, OPTN
GOTERM_BP_DIRECT	GO:0006270~DNA replication initiation	11	0.401606	9.89894e-05	ORC4, POLA2, MCM7, CCNE2, ORC1, PRIM1, ORC2, MCM3, MCM4, MCM5, CDC6
GOTERM_BP_DIRECT	GO:0051301~cell division	45	1.64294	0.000143859	ARL3, CDCA5, CDCA7L, MIS12, CCNF, VPS4A, RNF8, GNAI3, KATNB1, ABRAXAS2, NCAPH, AURKB, HERC5, BABAM1, CCNB2, CEP192, FSD1, CENPT, LIG1, ANAPC7, DYNLT3, PLK1, SETDB2, HAUS3, CDC6, CDC25C, CHFR, CDC25B, HAUS1, SPART, CCNE2, KATNAL1, STAG3, CDK4, CDC16, CDK1, CKS2, BIRC5, ANAPC4, ANAPC5, KIF2C, ATXN10, ZNF830, MAD1L1, ANAPC2
GOTERM_BP_DIRECT	GO:0042026~protein refolding	12	0.438116	0.000314558	HSPA9, HSPA8, DNAJB6, HSPA5, DNAJA4, DNAJA2, LOC693438, HSPA14, LOC114669856, B2M, HSPA13, HSPD1
GOTERM_BP_DIRECT	GO:0000045~autophagosome assembly	19	0.693684	0.000379669	RAB1A, ATG3, GABARAPL1, UBXN2B, TCIRG1, PSEN1, ATG14, VMP1, NSFL1C, ATG16L2, ATG16L1, ATG101, MAP1LC3C, RAB23, ULK3, ATG4B, ATG4A, TRIM32, ATG5
GOTERM_BP_DIRECT	GO:0006511~ubiquitin-dependent protein catabolic process	41	1.4969	0.000397765	USP38, PPP1R11, UBE2D4, CUL2, RNF8, UBE2D1, RNF6, HERC5, UCHL1, RNF115, MRPL2, OS9, ELOC, PSMF1, DISC1, FBXO8, UBL7, SKP1, XBP1, ARRDC1, LIMK2, RNF26, WWP2, NTAN1, FBXO10, LOC699631, TRPC4AP, CHFR, RC3H2, RNF144A, PSMA6, COPS3, PSMA3, RNF149, MDM2, MKRN2, MDM4, RNF185, TRIM32, RNF166, ANAPC2
GOTERM_BP_DIRECT	GO:0032259~methylation	38	1.38737	0.00048907	SETD4, KDM5B, SUV39H2, TPMT, SMYD5, SUV39H1, SETD6, METTL2A, EHMT2, RNF8, TRMT2A, ASH2L, RRP8, PHF8, FBL, NSD2, SMYD2, VCPKMT, DPH5, LCMT2, KMT5B, METTL6, SMYD4, TRMT44, LCMT1, TRMT1L, METTL18, KDM6A, TSFM, ICMT, SETDB2, JMJD6, RIOX1, NDUFAF7, BMT2, NDUFAF5, EEF1AKMT2, EZH2
GOTERM_BP_DIRECT	GO:0016192~vesicle-mediated transport	42	1.53341	0.000719085	NAPA, COPB2, SAR1A, KDELR1, SAR1B, STX18, GDI2, HSPA13, GGA1, SCFD1, AP1G1, VPS11, AP1S3, ZFPL1, BORCS7, VPS39, AP1M1, HSPA8, RAB2B, JAGN1, YIPF1, SYT2, RAB4B, YIPF2, SEC16A, VPS33A, HPS1, AP1B1, HPS4, TVP23B, ARFGAP3, DDOST, ARFGAP2, PER1, NECAP1, LOC704173, TBC1D20, VPS41, VAMP4, MON1A, BET1, VAMP3
GOTERM_BP_DIRECT	GO:0007030~Golgi organization	29	1.05878	0.000737728	LOC712182, RAB1A, TMED10, UBXN2B, ATL3, LOC100430473, DYM, ZNF501, LOC720574, TMED7, RAB6B, RAB2B, COG6, ATP8B1, SEC16A, COG4, TANGO2, ZFP69B, COG1, CSNK1D, GAK, VMP1, LOC100427840, NSFL1C, TBC1D20, GORASP1, PLEKHM2, CORO7, BLZF1
GOTERM_BP_DIRECT	GO:0006357~regulation of transcription by RNA polymerase II	221	8.06864	0.00081308	ZNF177, ZNF174, CCNH, ELK1, LOC114675589, ZNF607, ZNF846, KAT7, CCNL2, ZNF841, LOC695938, ZNF165, LOC717488, ZNF18, LOC720437, ZNF19, ZFP1, RFX2, MED9, ZNF10, ZNF14, ZNF16, THAP1, ZSCAN22, TCEANC2, ZSCAN26, ZNF398, ZSCAN29, ZNF397, ZNF274, ZNF324B, ZNF394, HOXD1, ZNF391, PRDM15, LOC714689, ZNF23, LOC100427976, ZBTB3, LOC695478, LOC710759, LOC100429350, ZBED1, ZNF821, ZNF268, ZNF267, ZNF266, ZNF38…
GOTERM_BP_DIRECT	GO:0008033~tRNA processing	14	0.511135	0.0011506	POP7, METTL2A, DDX1, WDR4, ELP3, TSEN2, MTO1, TSEN54, FARS2, METTL6, LCMT2, TRMT44, DUS3L, TRMT1L
GOTERM_BP_DIRECT	GO:0006260~DNA replication	21	0.766703	0.00115298	GINS2, STN1, MCM7, LIG1, RECQL, RPA2, LRWD1, SLC25A16, ORC4, POLA2, RECQL5, ORC1, GRWD1, POLD2, ORC2, MCM3, MCM4, E4F1, MCM5, POLL, POLE
GOTERM_BP_DIRECT	GO:0072332~intrinsic apoptotic signaling pathway by p53 class mediator	9	0.328587	0.00139886	WWOX, DDX5, RRN3, PERP, ERCC2, FHIT, RRP8, PDK2, BOK
GOTERM_BP_DIRECT	GO:0006457~protein folding	27	0.985761	0.00210313	HSPA4L, MESD, HSPD1, CCT6B, NUDCD3, LOC693438, QSOX1, CCT7, CCT5, CCT4, CCT3, TRAP1, CCT2, HSPA4, TBCC, P3H1, PDIA4, PDCL3, DNAJC1, DNAJA4, TTC4, CDC37, DNAJB11, PPIE, FKBP9, CALR, PPIC
GOTERM_BP_DIRECT	GO:0010506~regulation of autophagy	15	0.547645	0.00211606	XBP1, KLHL36, WDR41, KEAP1, UBE2D1, CISD2, TPCN2, MFSD8, RRAGB, LAMP3, ULK3, GPR137, FBXL2, DRAM2, BOK
GOTERM_BP_DIRECT	GO:0000422~autophagy of mitochondrion	11	0.401606	0.00320056	ATG3, GABARAPL1, WDR45B, MAP1LC3C, FUNDC1, LOC114675553, ATG9A, CISD2, USP30, FBXO7, ATG5
GOTERM_BP_DIRECT	GO:0006364~rRNA processing	23	0.839723	0.00328543	UTP15, NOP14, POP7, RPS7, UTP11, FCF1, PPAN, RRP1B, RBFA, UTP18, RRP8, BYSL, RRP7A, BOP1, FBL, TBL3, EXOSC4, LAS1L, EXOSC8, GEMIN4, TSR2, PIH1D2, NOP53
GOTERM_BP_DIRECT	GO:1900226~negative regulation of NLRP3 inflammasome complex assembly	6	0.219058	0.00369095	HSPA8, CPTP, ZDHHC12, NLRC3, FBXL2, MEFV
GOTERM_BP_DIRECT	GO:0034620~cellular response to unfolded protein	8	0.292077	0.00479645	HSPA9, HSPA8, HSPA5, HSF1, HSPA14, LOC114669856, HSPA13, OPTN
GOTERM_BP_DIRECT	GO:0006048~UDP-N-acetylglucosamine biosynthetic process	6	0.219058	0.006103	GNPDA1, GNPDA2, PGM3, GNPNAT1, UAP1, LOC114675318
GOTERM_BP_DIRECT	GO:0000338~protein deneddylation	6	0.219058	0.006103	COPS4, COPS3, COPS2, COPS7B, LOC699342, COPS7A
GOTERM_BP_DIRECT	GO:0001817~regulation of cytokine production	21	0.766703	0.00725779	MAP2K3, ZNF441, ZNF133, ZBTB17, ZNF582, ZNF19, HHLA2, ZBTB37, ZFP69B, ZNF23, F11R, ZNF16, HIC2, ZFP62, BCL6B, ZNF846, ZNF669, UBASH3A, ZNF567, ZNF555, ICOSLG
GOTERM_BP_DIRECT	GO:0008333~endosome to lysosome transport	12	0.438116	0.00740055	VPS18, PLEKHF1, FNTA, CDX2, BIN1, SORT1, VPS33A, VPS41, VIPAS39, ATG14, VPS39, VPS16
GOTERM_BP_DIRECT	GO:0016567~protein ubiquitination	56	2.04454	0.00793754	KLHL36, PPP1R11, FBH1, CCNF, KEAP1, PHRF1, LOC698056, HERC5, RNF115, MRPL2, TRIM3, ELOC, SKP1, VPS18, ATG3, ANAPC7, WSB2, ARRDC1, MUL1, FBXO10, TRPC4AP, TRAIP, LOC114675552, ANAPC5, TRIM59, RNF166, VCP, KLHL15, CUL2, RNF8, RNF6, CAND2, RAB40B, OS9, UBR7, VHL, TRIM42, DCAF11, DCAF13, ATG5, BRAP, LIMK2, RNF26, PLK1, WWP2, CHFR, FANCG, MKRN1, CDC16, ASB6, RNF182, MKRN2, ASB7, MDM4, RNF183, RNF185
GOTERM_BP_DIRECT	GO:0006310~DNA recombination	15	0.547645	0.00871621	TOP3B, XRCC6, LIG1, MCM8, XRCC5, TOP3A, RECQL, RPA2, ACTR8, RAD51D, RECQL5, EID3, EXO1, RUVBL2, ERCC5
GOTERM_BP_DIRECT	GO:0000727~double-strand break repair via break-induced replication	6	0.219058	0.00943967	MUS81, GINS2, MCM7, MCM3, MCM4, MCM5
GOTERM_BP_DIRECT	GO:0051086~chaperone mediated protein folding independent of cofactor	5	0.182548	0.00967474	CCT3, CCT2, CCT7, CCT5, CCT4
GOTERM_BP_DIRECT	GO:0040011~locomotion	5	0.182548	0.00967474	JPH3, WDR1, NEFL, PSEN1, HCRTR2
GOTERM_BP_DIRECT	GO:0000423~mitophagy	14	0.511135	0.00995144	GABARAPL1, ABCB6, ATG9A, ATG14, EIF2S1, NIPSNAP1, MAP1LC3C, FUNDC1, ULK3, ATG4B, ATG4A, SQSTM1, OGT, ATG5
GOTERM_BP_DIRECT	GO:0042149~cellular response to glucose starvation	12	0.438116	0.0107706	SH3GLB1, XBP1, NUAK2, HSPA5, SESN1, SUV39H1, SESN2, PRKAG1, PLIN3, ASNS, PRKAG2, RRP8
GOTERM_BP_DIRECT	GO:0031647~regulation of protein stability	19	0.693684	0.0110369	HSPA8, USP38, TMEM183A, KLHL36, USP5, USP4, PINX1, QRSL1, HDAC8, APTX, CDKN2AIP, TBX3, CCAR2, TMEM25, RNF149, CASP3, LMNA, PLTP, FBXO7
GOTERM_BP_DIRECT	GO:1990000~amyloid fibril formation	7	0.255568	0.0112944	GSN, FUS, MDM2, RIPK1, CD36, VHL, B2M
GOTERM_BP_DIRECT	GO:0036297~interstrand cross-link repair	10	0.365097	0.0132741	VCP, RAD51, FANCL, XRCC3, EXO5, HAUS3, FAN1, FANCG, FANCF, FAAP100
GOTERM_BP_DIRECT	GO:0070979~protein K11-linked ubiquitination	10	0.365097	0.0132741	RNF115, UBE2B, ANAPC7, RNF26, CDC16, UBE2E2, ANAPC4, ANAPC5, TRIM26, ANAPC2
GOTERM_BP_DIRECT	GO:0070131~positive regulation of mitochondrial translation	6	0.219058	0.0138456	RPUSD4, MRPS27, FASTKD2, RMND1, RPUSD3, CDK5RAP1
GOTERM_BP_DIRECT	GO:0045041~protein import into mitochondrial intermembrane space	4	0.146039	0.0142707	CHCHD4, AIFM1, LOC693438, HSPD1
GOTERM_BP_DIRECT	GO:0002318~myeloid progenitor cell differentiation	4	0.146039	0.0142707	SP3, BRAF, SLC37A4, JAM3
GOTERM_BP_DIRECT	GO:0006271~DNA strand elongation involved in DNA replication	4	0.146039	0.0142707	MCM7, POLD2, MCM3, MCM4
GOTERM_BP_DIRECT	GO:0032481~positive regulation of type I interferon production	9	0.328587	0.0144026	RAB2B, TBK1, DHX58, G3BP1, PLCG2, UAP1, KPNA2, TICAM1, GAPDH
GOTERM_BP_DIRECT	GO:0097345~mitochondrial outer membrane permeabilization	5	0.182548	0.015777	BNIP3L, RTL10, BNIP3, LOC114674310, VDAC2
GOTERM_BP_DIRECT	GO:0000724~double-strand break repair via homologous recombination	21	0.766703	0.0159247	STN1, PSMD14, MCM8, FBH1, MCM9, XRCC3, TOP3A, RECQL, RPA2, HAUS3, HUS1, INIP, RAD52, RAD51B, RAD51D, RAD51, RECQL5, SFR1, NABP1, POLL, FAN1
GOTERM_BP_DIRECT	GO:0050821~protein stabilization	30	1.09529	0.0174341	CCNH, MCM8, PIGY, MFSD8, BRINP1, NCLN, PDCD10, AKT2, CCT7, CCT5, TRIM44, CCT4, IP6K2, CCT3, CCT2, UBE2B, WFS1, SEC16A, HIP1R, HPS4, MUL1, P3H1, ATP1B3, TMC6, CREB1, CDC37, NAA16, MDM4, CALR, NOP53
GOTERM_BP_DIRECT	GO:1904262~negative regulation of TORC1 signaling	12	0.438116	0.0178778	ATXN3, TBK1, SAR1B, BMT2, SESN1, NPRL2, SESN2, AKT1S1, UBE2D1, TSC2, VHL, YWHAH
GOTERM_BP_DIRECT	GO:0006886~intracellular protein transport	42	1.53341	0.0179585	NAPA, VPS29, RAB1A, COPB2, TMED10, RAB3A, SAR1A, SAR1B, RAB3D, STX18, VPS26C, SNX10, TOMM20, GGA1, AP3M1, SCFD1, AP1G1, RAB23, VPS11, TLK1, BCAP29, AP3S2, AP1S3, TMED7, SEC23B, RAB6B, VPS39, AP2M1, VPS16, AP1M1, WLS, BCAP31, VPS18, VPS33A, AP1B1, ASPSCR1, SYTL3, EHD1, CDK5, SRPRA, PICK1, VIPAS39
GOTERM_BP_DIRECT	GO:0000122~negative regulation of transcription by RNA polymerase II	108	3.94304	0.0191512	ZNF177, ZNF174, PRDM6, EHMT2, KEAP1, LOXL2, LOC693477, ZNF846, TRIM27, ZNF567, ZNF566, ZNF565, LOC720035, MEN1, ZNF684, ZNF441, ZNF19, ZFP1, ZBTB37, ZFP69B, ARID5A, ZNF10, ZNF16, HIC2, NIF3L1, BRMS1, BIN1, ZNF557, ZNF555, SQSTM1, ZNF274, DDX5, CTR9, ZNF23, PSEN1, NPAS1, MIER2, LOC720251, MBIP, ZNF669, SMYD2, ZNF302, ZNF268, ZBTB17, ZNF140, WFS1, PLK1, KLHL24, BMP6, ZFP62, MDM2, PAF1, MDM4, CALR, …
GOTERM_BP_DIRECT	GO:0010971~positive regulation of G2/M transition of mitotic cell cycle	8	0.292077	0.0192835	RAD51B, RAD51C, CDK4, CDK1, DBF4B, CDC25C, STOX1, CDC25B
GOTERM_BP_DIRECT	GO:0034497~protein localization to phagophore assembly site	7	0.255568	0.0200811	ABCB6, ATG16L1, WDR45B, LOC114675553, ATG9A, MFN2, ATG4B
GOTERM_BP_DIRECT	GO:0032456~endocytic recycling	13	0.474626	0.0209147	VPS29, ANKRD27, VPS26C, EHD1, SNX4, EHD3, VPS50, VPS52, CCDC22, VAMP4, CCDC93, VPS39, VPS35L
GOTERM_BP_DIRECT	GO:0000278~mitotic cell cycle	20	0.730194	0.0227389	CENPT, CETN1, TUBGCP2, MIS12, SETDB2, PLK1, TUBD1, LOC106993939, GEM, LOC712533, LOC707215, TUBA3E, CEP250, LOC106996033, TUBGCP3, MYBL2, POLE, LOC722862, SKP1, LOC708952
GOTERM_BP_DIRECT	GO:0002183~cytoplasmic translational initiation	5	0.182548	0.0238343	EIF2B5, EIF4A1, EIF2B4, EIF3I, LOC695050
GOTERM_BP_DIRECT	GO:0045862~positive regulation of proteolysis	7	0.255568	0.0258476	HDAC2, IST1, PERP, CALML4, BTRC, OGT, TRIM32
GOTERM_BP_DIRECT	GO:0000480~endonucleolytic cleavage in 5'-ETS of tricistronic rRNA transcript (SSU-rRNA, 5.8S rRNA, LSU-rRNA)	4	0.146039	0.0260118	RCL1, TBL3, FCF1, NOP9
GOTERM_BP_DIRECT	GO:0002098~tRNA wobble uridine modification	6	0.219058	0.026352	CTU2, URM1, ELP1, ELP2, ELP3, MTO1
GOTERM_BP_DIRECT	GO:0042407~cristae formation	6	0.219058	0.026352	LETM1, CHCHD3, APOOL, DNAJC11, IMMT, SLC25A46
GOTERM_BP_DIRECT	GO:0097401~synaptic vesicle lumen acidification	6	0.219058	0.026352	ATP6V1G1, ATP6AP2, ATP6V1E1, ATP6V0D1, ATP6V1D, ATP6V1C1
GOTERM_BP_DIRECT	GO:0015031~protein transport	48	1.75246	0.0268064	VPS29, KDELR1, ARL3, GDI2, PSEN1, SNX4, SCFD1, VPS50, VPS52, MVB12B, CHMP1A, BCAP29, CEP192, TMED7, ATG3, ACOT8, YIPF1, RAB4B, NUP133, COG6, EXOC7, ARRDC1, IST1, SEC16A, ARRDC2, COG4, VPS33A, RHBDF2, RANBP17, COG1, ELMOD3, ARFGAP3, ARFGAP2, YIF1B, TOM1L1, NECAP1, SLC7A6OS, LOC704173, NUP50, PEX5, ATG4B, ATG4A, VPS25, CHMP7, COPE, BET1, VAMP3, VPS35L
GOTERM_BP_DIRECT	GO:0006099~tricarboxylic acid cycle	10	0.365097	0.027663	ACLY, MDH1, IDH2, LOC723069, ACO1, OGDHL, SUCLG1, ACO2, SDHA, IDH3A
GOTERM_BP_DIRECT	GO:0051085~chaperone cofactor-dependent protein refolding	9	0.328587	0.031667	HSPA9, HSPA8, TOR1A, HSPA5, ST13, HSPA14, LOC114669856, HSPA13, DNAJC18
GOTERM_BP_DIRECT	GO:0055089~fatty acid homeostasis	5	0.182548	0.0339665	XBP1, DGAT2, GOT1, LOC719262, ABCD1
GOTERM_BP_DIRECT	GO:0002682~regulation of immune system process	18	0.657174	0.0341951	ZNF441, ZNF133, ZBTB17, ZNF582, ZNF19, ZBTB37, ZFP69B, ZNF23, ZNF16, HIC2, ZFP62, BCL6B, ZNF846, ZNF669, ZNF567, SIAE, GGT1, ZNF555
GOTERM_BP_DIRECT	GO:0006633~fatty acid biosynthetic process	12	0.438116	0.0366767	FA2H, ACLY, PRKAB2, MECR, ACSM1, TECR, PRKAG1, PRKAG2, MLYCD, HACD3, PRKAB1, ACACB
GOTERM_BP_DIRECT	GO:0030316~osteoclast differentiation	10	0.365097	0.0379282	FARP2, CREB1, GLO1, GPC3, CTNNB1, SNX10, TCIRG1, SLC4A2, FOS, TOB2
GOTERM_BP_DIRECT	GO:1903006~positive regulation of protein K63-linked deubiquitination	3	0.109529	0.0396658	VCP, NOP53, FANCG
GOTERM_BP_DIRECT	GO:2001140~positive regulation of phospholipid transport	3	0.109529	0.0396658	CETP, PRELID1, TRIAP1
GOTERM_BP_DIRECT	GO:0019627~urea metabolic process	3	0.109529	0.0396658	CYP2C9, CYP2C18
GOTERM_BP_DIRECT	GO:0039689~negative stranded viral RNA replication	3	0.109529	0.0396658	ATG16L2, ATG16L1, ATG5
GOTERM_BP_DIRECT	GO:0001765~membrane raft assembly	3	0.109529	0.0396658	ANXA2, RFTN1, LRCH4
GOTERM_BP_DIRECT	GO:0006888~endoplasmic reticulum to Golgi vesicle-mediated transport	22	0.803213	0.0408301	BCAP31, COPB2, TMED10, SAR1A, KDELR1, SAR1B, SEC16A, YIPF4, RABGGTA, NRBP1, YIF1B, SCFD1, GNPDA2, TBC1D20, TRAPPC6B, BCAP29, HYOU1, ERGIC3, TMED7, SEC23B, COPE, BET1
GOTERM_BP_DIRECT	GO:0180010~co-transcriptional mRNA 3'-end processing, cleavage and polyadenylation pathway	4	0.146039	0.041514	CPSF6, CSTF3, CPSF3, TUT1
GOTERM_BP_DIRECT	GO:1900027~regulation of ruffle assembly	4	0.146039	0.041514	SH3YL1, RHOG, CORO1C, ICAM1
GOTERM_BP_DIRECT	GO:0006750~glutathione biosynthetic process	4	0.146039	0.041514	GSS, SLC1A1, SLC1A2, GCLM
GOTERM_BP_DIRECT	GO:1904851~positive regulation of establishment of protein localization to telomere	4	0.146039	0.041514	CCT3, CCT7, CCT5, CCT4
GOTERM_BP_DIRECT	GO:1903779~regulation of cardiac conduction	4	0.146039	0.041514	ACE2, EHD3, FPGT, AGT
GOTERM_BP_DIRECT	GO:0010637~negative regulation of mitochondrial fusion	4	0.146039	0.041514	VAT1, ADCK1, MUL1, OMA1
GOTERM_BP_DIRECT	GO:1902237~positive regulation of endoplasmic reticulum stress-induced intrinsic apoptotic signaling pathway	4	0.146039	0.041514	NCK2, RNF183, BOK, NCK1
GOTERM_BP_DIRECT	GO:0034394~protein localization to cell surface	8	0.292077	0.0432019	GGA1, USP4, PIGK, CTNNB1, EMP2, ASTN2, MESD, JAM3
GOTERM_BP_DIRECT	GO:0006289~nucleotide-excision repair	10	0.365097	0.043922	CHCHD4, STN1, CETN1, ERCC2, RPA2, HUS1, ERCC5, POLL, GTF2H2, FAN1
GOTERM_BP_DIRECT	GO:0030308~negative regulation of cell growth	17	0.620664	0.0439978	TSPYL2, CDKN2D, DCUN1D3, EAF2, NAIF1, MUL1, OSGIN2, CGRRF1, SMARCA2, CDKN2AIP, CCAR2, GDF9, FRZB, SESN2, MLYCD, CRLF3, IP6K2
GOTERM_BP_DIRECT	GO:0060236~regulation of mitotic spindle organization	6	0.219058	0.0443668	GPSM2, DYNC1H1, DCTN1, TACC3, FSD1, RAE1
GOTERM_BP_DIRECT	GO:2000786~positive regulation of autophagosome assembly	6	0.219058	0.0443668	SH3GLB1, MOAP1, SNX4, PIP4K2A, PIP4K2C, TRIM32
GOTERM_BP_DIRECT	GO:0000226~microtubule cytoskeleton organization	25	0.912742	0.044742	TXNDC9, CETN1, ULK4, TUBD1, SPATA7, LOC707215, TUBA3E, MRPL2, NUAK2, PPP2R3C, NEFL, DISC1, MAP1S, LOC106993939, LOC712533, TTLL1, MAP7D2, TACC3, LOC106996033, CALM3, SIK2, TTLL9, LOC708952, ZPR1, LOC722862
GOTERM_BP_DIRECT	GO:0043065~positive regulation of apoptotic process	34	1.24133	0.0448986	C2H3ORF38, DCUN1D3, HTRA2, OMA1, AUP1, PSEN1, CCAR2, GRIN2A, FRZB, TCTN3, CASP3, LOC114674310, MAP3K20, CCN1, CTSD, ZNF268, CTNNBL1, IP6K2, BOK, HSPA9, MOAP1, BNIP3L, UTP11, BNIP3, DAPK2, DAPK3, HIP1R, ZNF10, RRP1B, LATS1, STK17A, BIN1, BAX, PDCD2
GOTERM_BP_DIRECT	GO:0006626~protein targeting to mitochondrion	5	0.182548	0.0462299	BCAP31, TOMM34, MFN2, MFF, FBXO7
GOTERM_BP_DIRECT	GO:0033314~mitotic DNA replication checkpoint signaling	5	0.182548	0.0462299	ORC1, RAD17, HUS1, CDC6, ZNF830
GOTERM_BP_DIRECT	GO:0061723~glycophagy	5	0.182548	0.0462299	ATG3, GABARAPL1, WDR45B, LOC114675553, GAA
GOTERM_BP_DIRECT	GO:0016239~positive regulation of macroautophagy	7	0.255568	0.0493445	BNIP3L, SESN1, SESN2, GNAI3, TRIM13, TSC2, WDR24
