# Supplementary material
Source: Research Square preprint supplement (doi:10.21203/rs.3.rs-7771199/v1)
Supplement: Supplementary file 9 [file 82c6c0d229c9187749bb2bb3.xlsx]

## Sheet: DEG in O4C vs Y4C
Differentially expressed genes in O4C vs Y4C
Gene symbol	P-value	Log2FoldChange	Adjusted P-value	Status
AASS	3.05064e-08	1.60568	0.000820957	down
ABCC1	2.17322e-10	1.92397	5.84835e-06	down
ABCC4	1.90222e-07	1.47598	0.00511907	down
ACACB	1.02002e-06	1.38776	0.0274497	down
ACIN1	2.21255e-10	1.70457	5.9542e-06	down
ACO2	4.70875e-12	2.6206	1.26717e-07	down
ACR	9.83271e-08	1.62545	0.00264608	down
ACSM1	1.69227e-07	2.28239	0.00455406	down
ACSS2	1.4229e-06	1.91099	0.0382916	down
ACTL8	1.03084e-12	1.63751	2.77409e-08	down
ADA2	1.75286e-08	1.70789	0.000471712	down
ADAM10	1.34373e-09	1.81428	3.6161e-05	down
ADAM19	1.50478e-06	1.65455	0.0404951	down
ADAM28	2.9821e-12	1.61645	8.02514e-08	down
ADAMTS15	1.11902e-09	1.31268	3.0114e-05	down
ADAMTS17	2.56129e-14	1.74519	6.89268e-10	down
ADAMTS2	1.37474e-14	1.97625	3.69957e-10	down
ADAMTS9	1.60446e-07	1.45353	0.00431777	down
ADAMTSL2	2.91115e-12	2.56256	7.83421e-08	down
ADAR	1.78003e-11	1.39232	4.79023e-07	down
ADCY3	2.1791e-07	1.85029	0.00586419	down
ADGRG3	4.67699e-10	2.5705	1.25863e-05	down
AFF2	1.47585e-06	1.08747	0.0397165	down
AFF4	1.58248e-07	1.66036	0.00425861	down
AGBL5	3.23794e-08	2.0555	0.000871361	down
AGFG2	1.01066e-07	1.82116	0.00271979	down
AGO2	3.59012e-14	2.0592	9.66138e-10	down
AGPAT4	5.45275e-07	1.2152	0.0146739	down
AK2	9.80215e-12	2.40007	2.63786e-07	down
AK5	3.45751e-07	1.76109	0.0093045	down
AKAP11	2.96763e-10	1.14837	7.98618e-06	down
AKAP6	1.94258e-08	1.70992	0.000522766	down
AKIP1	3.6119e-11	2.75475	9.71998e-07	down
AKNA	1.05291e-11	2.02273	2.83349e-07	down
AKT2	1.073e-10	2.10516	2.88756e-06	down
ALDH3B1	5.96559e-11	1.58948	1.6054e-06	down
ALMS1	6.46218e-11	1.74655	1.73904e-06	down
ALOX5AP	5.98249e-08	2.16647	0.00160995	down
ALPL	1.7566e-22	1.94488	4.72718e-18	down
AMBRA1	2.39482e-10	1.96834	6.44471e-06	down
AMER1	1.59506e-07	2.03124	0.00429246	down
AMPD1	3.19114e-16	2.08527	8.58769e-12	down
ANKH	2.25415e-07	2.12952	0.00606614	down
ANKRD17	4.60764e-10	1.54187	1.23996e-05	down
ANKRD53	8.81263e-07	2.28106	0.0237157	down
ANKRD55	3.28606e-13	1.43225	8.84312e-09	down
ANO1	4.34425e-08	1.47237	0.00116908	down
AP2A2	1.98825e-13	2.32846	5.35059e-09	down
AP3B1	2.8402e-09	1.49007	7.64327e-05	down
AP3D1	5.45219e-07	2.11443	0.0146724	down
APBA3	2.74914e-07	2.23116	0.0073982	down
APEH	1.02883e-09	2.32746	2.76869e-05	down
APOBEC1	3.92386e-14	1.65212	1.05595e-09	down
APPL2	3.08076e-09	2.10301	8.29064e-05	down
ARAP1	1.48851e-10	2.16044	4.00572e-06	down
AREL1	7.3619e-07	1.59312	0.0198116	down
ARF3	1.09952e-08	1.98147	0.000295892	down
ARHGAP10	1.02004e-09	2.08725	2.74502e-05	down
ARHGAP27	5.06022e-10	2.00771	1.36175e-05	down
ARHGAP31	2.13255e-08	1.66572	0.000573891	down
ARHGAP32	2.17978e-09	1.87449	5.866e-05	down
ARHGAP35	8.77436e-11	1.67465	2.36127e-06	down
ARHGAP39	9.87812e-12	2.0141	2.6583e-07	down
ARHGAP44	5.32593e-13	2.34452	1.43326e-08	down
ARHGDIA	6.04558e-12	1.74805	1.62693e-07	down
ARHGEF12	5.17123e-07	1.79562	0.0139163	down
ARHGEF17	3.95514e-09	1.63367	0.000106437	down
ARHGEF7	7.87937e-12	1.58906	2.12042e-07	down
ARID1A	6.12973e-11	1.80047	1.64957e-06	down
ARID3B	5.66207e-08	1.54119	0.00152372	down
ARIH1	6.36519e-13	2.57862	1.71294e-08	down
ARL15	2.75671e-08	2.10884	0.000741859	down
ARPP19	2.80009e-07	1.59926	0.00753533	down
ASAP3	4.93025e-07	1.23733	0.0132678	down
ASB2	4.27413e-31	2.98961	1.15021e-26	down
ASTL	4.70612e-13	2.83601	1.26646e-08	down
ASXL1	2.47357e-16	2.83038	6.65663e-12	down
ASXL2	8.01021e-10	1.73024	2.15563e-05	down
ATF2	8.3693e-07	1.26764	0.0225226	down
ATG2B	8.26768e-08	1.6376	0.00222492	down
ATG4B	7.0297e-08	2.23203	0.00189176	down
ATP11A	4.87546e-07	1.4865	0.0131204	down
ATP5F1B	6.34637e-08	1.61402	0.00170787	down
ATP5MC2	3.62995e-11	2.49886	9.76856e-07	down
ATP6V0A4	2.8617e-08	2.00094	0.000770112	down
ATP6V0C	1.0861e-15	2.37201	2.92281e-11	down
ATP6V1E1	5.47093e-08	1.73785	0.00147228	down
ATPSCKMT	2.35372e-08	2.12578	0.000633411	down
ATXN1L	6.97009e-11	1.93001	1.87572e-06	down
ATXN2L	3.85603e-13	2.22719	1.0377e-08	down
ATXN7	1.52252e-07	2.24956	0.00409725	down
ATXN7L2	6.84379e-11	2.49621	1.84173e-06	down
AZI2	9.4968e-09	1.86976	0.000255568	down
B3GALNT1	3.71276e-14	2.57368	9.99141e-10	down
B3GNT2	1.56398e-07	1.69436	0.00420883	down
B4GALT5	4.5375e-07	1.72234	0.0122109	down
BABAM1	2.88963e-07	1.83925	0.00777627	down
BACH1	3.19383e-14	2.0373	8.59492e-10	down
BACH2	4.57795e-08	1.51821	0.00123197	down
BAG6	2.56609e-07	1.81838	0.0069056	down
BAIAP2L1	6.13545e-09	1.46116	0.000165111	down
BAP1	6.9581e-08	2.05073	0.00187249	down
BAZ2A	3.31274e-09	1.59672	8.91491e-05	down
BCAP31	3.34498e-09	2.0512	9.00169e-05	down
BCCIP	1.51583e-08	1.40123	0.000407926	down
BCL2L13	6.57701e-07	1.04079	0.0176994	down
BCL9	4.54342e-12	1.99633	1.22268e-07	down
BCORL1	2.62622e-16	2.536	7.06742e-12	down
BEND3	9.93156e-13	1.96409	2.67268e-08	down
BICRA	3.38431e-08	1.95227	0.000910752	down
BIN1	5.75803e-08	1.99728	0.00154954	down
BIRC6	3.36485e-07	1.43165	0.00905515	down
BLOC1S3	1.0637e-09	2.92269	2.86251e-05	down
BLOC1S6	1.39772e-13	2.09883	3.76141e-09	down
BMP6	1.60345e-09	1.89574	4.31505e-05	down
BNC1	1.20426e-06	1.79728	0.0324079	down
BOC	8.11482e-15	1.73146	2.18378e-10	down
BOK	7.17812e-08	3.32264	0.0019317	down
BORCS7	6.53312e-07	1.5781	0.0175813	down
BRD1	2.14901e-13	2.36652	5.7832e-09	down
BRD3	1.69038e-07	1.48501	0.00454898	down
BRD9	1.21447e-07	1.66655	0.00326826	down
BRMS1	4.76558e-15	3.48587	1.28247e-10	down
BRPF3	2.53702e-11	2.07077	6.82737e-07	down
BSDC1	8.32591e-14	2.70743	2.24059e-09	down
BSG	5.60648e-11	2.3419	1.50876e-06	down
BTBD18	1.23697e-08	1.94008	0.000332882	down
BUB3	1.01315e-09	1.58002	2.72649e-05	down
C11H12orf49	1.25914e-06	1.46337	0.0338846	down
C12H2orf76	1.55608e-10	2.36268	4.18757e-06	down
C19H19orf54	1.57338e-06	1.35624	0.0423413	down
C1H1orf174	1.02568e-08	1.86905	0.000276021	down
C1H1orf210	2.23014e-12	3.19397	6.00152e-08	down
C20H16orf54	4.90824e-11	1.44557	1.32086e-06	down
C20H16orf71	8.19919e-11	2.42557	2.20648e-06	down
C20H16orf72	1.02239e-07	1.27892	0.00275137	down
C4H6orf15	8.33849e-13	3.306	2.24397e-08	down
C4H6orf52	1.27862e-09	2.36692	3.4409e-05	down
C4H6orf89	2.71407e-07	2.37614	0.00730384	down
C5H4orf19	8.64548e-07	1.99375	0.0232659	down
C6H5orf49	3.64597e-08	2.31219	0.000981167	down
C6H5orf51	3.06832e-08	1.76313	0.000825717	down
C9H10orf90	4.69066e-09	2.12161	0.00012623	down
CABYR	1.74528e-07	1.37698	0.00469672	down
CACNA1A	2.88288e-10	1.71929	7.75811e-06	down
CACNA1H	7.98314e-11	1.91852	2.14834e-06	down
CADPS	2.20208e-13	2.38812	5.92602e-09	down
CAMSAP3	6.24678e-09	2.19518	0.000168107	down
CAPN1	2.16019e-07	1.61362	0.00581328	down
CAPZB	2.747e-12	2.60719	7.39246e-08	down
CARM1	2.39809e-10	2.41947	6.4535e-06	down
CBLN2	6.05832e-10	2.03095	1.63035e-05	down
CBX2	1.55225e-09	1.93445	4.17727e-05	down
CC2D2B	6.2944e-10	1.65247	1.69389e-05	down
CCDC175	1.17451e-06	1.12871	0.0316073	down
CCDC40	6.85232e-10	1.51977	1.84403e-05	down
CCDC6	1.72554e-12	1.52062	4.6436e-08	down
CCDC9	8.55169e-08	1.86765	0.00230135	down
CCNI2	3.43998e-08	1.8434	0.000925732	down
CD276	2.36594e-12	2.53056	6.36699e-08	down
CD5	2.97513e-09	1.7749	8.00637e-05	down
CDC20B	4.94351e-11	2.53501	1.33035e-06	down
CDC25B	1.48219e-10	1.93795	3.98873e-06	down
CDC42BPB	3.4602e-12	2.4228	9.31174e-08	down
CDH8	1.0601e-07	1.44284	0.00285283	down
CDK13	1.03341e-07	1.3742	0.002781	down
CDK16	7.42002e-09	2.06121	0.00019968	down
CDK2AP2	4.6597e-08	1.53246	0.00125397	down
CDON	1.00989e-06	1.58632	0.027177	down
CDR1	2.11138e-09	3.22947	5.68193e-05	down
CELF5	4.76038e-07	1.43941	0.0128107	down
CELSR1	4.17331e-14	2.74024	1.12308e-09	down
CELSR2	1.25436e-11	1.91845	3.37561e-07	down
CEMIP2	4.16132e-07	1.61219	0.0111985	down
CEP170B	1.78574e-08	2.25234	0.000480559	down
CERS6	2.90437e-10	1.71359	7.81595e-06	down
CETP	5.57794e-09	1.41167	0.000150108	down
CFAP298	1.02691e-07	1.59718	0.00276351	down
CFL1	1.08968e-12	2.13348	2.93243e-08	down
CHD2	1.18618e-07	1.51483	0.00319214	down
CHD4	2.19093e-07	1.39564	0.00589601	down
CHERP	4.43586e-07	1.44046	0.0119373	down
CHP1	1.09135e-07	1.45009	0.00293692	down
CHRDL2	4.82849e-07	2.1832	0.012994	down
CIPC	5.35936e-08	2.27409	0.00144226	down
CITED2	8.44862e-10	3.86743	2.27361e-05	down
CLDN12	1.1057e-09	2.60752	2.97554e-05	down
CLDN4	8.33281e-11	3.77937	2.24244e-06	down
CLEC1A	1.38521e-06	1.62307	0.0372775	down
CLUH	7.65022e-11	2.05704	2.05875e-06	down
CMIP	3.10091e-10	1.90365	8.34485e-06	down
CMTM4	1.05746e-11	2.09007	2.84573e-07	down
CMTR2	1.18293e-09	1.75602	3.18339e-05	down
CNDP1	1.43678e-10	2.84924	3.86653e-06	down
CNFN	1.5463e-06	2.26759	0.0416124	down
CNN2	6.83639e-07	2.02014	0.0183974	down
CNNM2	2.16569e-10	1.24836	5.82808e-06	down
CNOT11	3.36226e-07	1.68304	0.00904818	down
CNOT3	5.14396e-08	1.79165	0.00138429	down
CNOT4	8.5471e-08	1.33328	0.00230011	down
CNOT7	5.04348e-09	1.53052	0.000135725	down
CNRIP1	1.27655e-06	1.3606	0.0343533	down
COL28A1	9.16829e-11	1.83383	2.46728e-06	down
COL6A3	9.87162e-07	1.60738	0.0265655	down
COPS7B	2.99608e-07	1.57277	0.00806275	down
CORO7	4.75007e-12	2.21347	1.27829e-07	down
CPNE2	1.65533e-10	2.535	4.45466e-06	down
CPNE7	2.14203e-09	1.7515	5.7644e-05	down
CPSF4	1.54045e-14	3.19211	4.14551e-10	down
CRAMP1	1.89302e-10	1.69079	5.0943e-06	down
CRB3	2.48262e-07	2.15217	0.00668097	down
CREB5	4.32994e-24	3.29033	1.16523e-19	down
CRIM1	2.00373e-11	2.0707	5.39224e-07	down
CRTC1	6.73514e-21	3.12348	1.81249e-16	down
CRTC3	5.61788e-15	2.19859	1.51183e-10	down
CRYBA4	6.07385e-07	1.27229	0.0163453	down
CRYBG2	1.53957e-06	1.37254	0.0414315	down
CRYL1	1.361e-06	2.25612	0.0366258	down
CRYZ	4.40057e-14	1.92813	1.18424e-09	down
CSDC2	4.31198e-09	2.07568	0.00011604	down
CSK	6.63348e-08	2.33494	0.00178514	down
CSNK1G1	1.43906e-10	1.89137	3.87266e-06	down
CSNK2B	3.13432e-08	1.54743	0.000843476	down
CSRP1	1.54175e-07	1.91678	0.004149	down
CTNNA3	2.9167e-08	1.64423	0.000784912	down
CTNNB1	4.81813e-08	1.61834	0.00129661	down
CTSB	7.04622e-07	1.43343	0.0189621	down
CUX2	6.37416e-15	1.53215	1.71535e-10	down
CYB561	4.53886e-07	1.91043	0.0122145	down
CYB5B	3.78679e-09	2.02582	0.000101906	down
CYREN	1.65026e-09	2.59012	4.44101e-05	down
DAB2IP	5.25961e-13	2.73984	1.41541e-08	down
DAD1	1.12301e-07	1.18026	0.00302214	down
DAGLA	1.57315e-06	1.40884	0.0423349	down
DARS	1.27976e-07	1.46707	0.00344396	down
DAZL	6.04751e-08	1.8241	0.00162745	down
DCAF4L2	7.5878e-08	1.92478	0.00204195	down
DCAF7	4.91119e-07	1.64859	0.0132165	down
DCBLD1	1.32643e-08	2.32612	0.000356954	down
DCDC2C	7.82352e-07	1.05808	0.0210539	down
DCTN1	1.0367e-09	2.0211	2.78985e-05	down
DCTN5	3.08003e-08	1.97343	0.000828867	down
DDA1	8.13738e-07	1.07186	0.0218985	down
DDB1	5.20632e-18	2.64099	1.40107e-13	down
DDC	2.81558e-21	1.67353	7.57701e-17	down
DDR1	1.6829e-06	1.61221	0.0452884	down
DDX39A	2.44491e-07	1.1687	0.00657949	down
DECR2	1.43221e-08	1.74289	0.000385421	down
DEDD	1.82667e-09	1.35283	4.91575e-05	down
DENND4C	1.07586e-08	1.42797	0.000289525	down
DENND5A	1.17018e-08	2.38863	0.000314907	down
DENND5B	4.4308e-12	1.93864	1.19237e-07	down
DGCR2	8.30108e-11	2.08217	2.2339e-06	down
DGKB	1.57086e-09	1.48622	4.22733e-05	down
DHCR7	1.17565e-09	1.83093	3.16379e-05	down
DHRS1	3.62598e-07	2.13416	0.00975789	down
DHX34	1.40591e-09	2.26824	3.78344e-05	down
DHX8	4.63201e-10	2.11806	1.24652e-05	down
DIAPH1	1.08349e-10	1.99376	2.91578e-06	down
DIP2C	3.19806e-11	1.90948	8.6063e-07	down
DIRAS2	4.20528e-07	1.32117	0.0113168	down
DIS3L	2.73166e-20	1.83498	7.35116e-16	down
DISC1	1.54345e-15	2.28079	4.15357e-11	down
DLST	3.26914e-18	2.70444	8.79759e-14	down
DMAC2	8.96429e-07	2.02164	0.0241238	down
DMRTC2	1.2516e-06	2.04548	0.0336818	down
DMTN	4.73009e-10	2.20437	1.27291e-05	down
DNAJA2	2.0569e-07	1.17957	0.00553532	down
DNAJB5	1.02192e-11	2.43239	2.75008e-07	down
DNAJC13	9.21919e-10	1.9037	2.48097e-05	down
DNAJC6	5.69378e-08	1.52397	0.00153225	down
DNMT1	1.45308e-07	1.03745	0.00391039	down
DNMT3A	2.97908e-07	1.11775	0.008017	down
DNMT3B	1.08978e-07	2.42536	0.0029327	down
DOT1L	2.66672e-09	1.89914	7.1764e-05	down
DPP6	2.80684e-12	2.04406	7.55348e-08	down
DPP9	4.09643e-09	1.69857	0.000110239	down
DPPA4	2.54665e-10	1.76453	6.8533e-06	down
DPY19L3	3.59018e-08	1.70687	0.000966154	down
DRG1	1.15084e-06	1.61111	0.0309703	down
DROSHA	1.3295e-13	1.60546	3.57781e-09	down
DTD2	3.86187e-10	2.97981	1.03927e-05	down
DTNB	1.88597e-10	2.19242	5.07534e-06	down
DUSP10	6.08493e-08	2.07255	0.00163751	down
DUSP16	2.57847e-12	2.13533	6.93892e-08	down
DUSP19	1.28511e-09	2.59754	3.45836e-05	down
DUSP7	1.39948e-08	1.84344	0.000376614	down
DUSP8	9.95372e-08	1.68187	0.00267864	down
DYM	9.8102e-10	2.21583	2.64002e-05	down
DYRK1A	2.38415e-13	2.82409	6.41599e-09	down
E2F4	2.55609e-08	2.25657	0.000687869	down
ECSCR	1.61704e-08	1.49831	0.000435161	down
EDA	3.09527e-09	1.52374	8.32967e-05	down
EDC4	5.11795e-07	2.11235	0.0137729	down
EEF1A2	6.56605e-07	2.61586	0.0176699	down
EEF2	1.78157e-11	2.20777	4.79438e-07	down
EEF2K	1.03841e-09	1.7975	2.79446e-05	down
EFR3B	2.68298e-15	2.08492	7.22018e-11	down
EIF4E1B	5.67898e-22	4.61813	1.52827e-17	down
EIF4ENIF1	2.17235e-11	1.41034	5.84601e-07	down
EIF4H	2.00764e-09	2.1168	5.40275e-05	down
ELK4	7.83203e-14	3.23401	2.10768e-09	down
ELMO1	1.29881e-06	1.42509	0.0349522	down
ELMSAN1	1.35764e-06	1.77854	0.0365354	down
ELN	2.11804e-12	2.04295	5.69986e-08	down
ELOVL6	1.38954e-08	1.80749	0.000373939	down
EMD	4.18581e-07	1.8004	0.0112644	down
ENG	2.24079e-16	2.74973	6.03018e-12	down
ENTPD7	1.62225e-06	1.07218	0.0436563	down
EP300	5.4355e-12	1.83077	1.46275e-07	down
EP400	3.41213e-09	1.68678	9.18238e-05	down
EPAS1	1.27873e-08	1.9903	0.000344118	down
EPB41L2	8.26562e-08	1.2945	0.00222436	down
EPG5	5.0766e-10	1.84153	1.36616e-05	down
EPS15	1.46915e-12	1.80257	3.95364e-08	down
EPS8L3	1.00263e-07	1.64257	0.00269818	down
ERF	1.3106e-13	3.21603	3.52696e-09	down
ESCO2	1.31699e-09	1.20662	3.54415e-05	down
ESPL1	7.21506e-11	2.23877	1.94164e-06	down
ESRRB	1.06902e-13	2.96228	2.87683e-09	down
ESYT2	6.93215e-15	2.81015	1.86551e-10	down
ETHE1	8.22539e-07	1.95427	0.0221353	down
EXOC4	5.80569e-07	1.56251	0.0156237	down
EXTL1	5.81214e-07	1.96711	0.0156411	down
EXTL3	2.97672e-10	1.89114	8.01064e-06	down
FAAP100	4.77608e-08	2.33035	0.00128529	down
FAM120A	2.91121e-07	1.81016	0.00783435	down
FAM122B	1.74597e-13	2.69724	4.69859e-09	down
FAM129B	1.11701e-07	1.76171	0.003006	down
FAM13A	1.98891e-11	2.01479	5.35236e-07	down
FAM160A1	7.56202e-09	1.27554	0.000203502	down
FAM160A2	8.42382e-10	2.19731	2.26693e-05	down
FAM168A	2.42142e-11	2.07798	6.51629e-07	down
FAM169A	1.49056e-11	2.00613	4.01125e-07	down
FAM178B	2.03675e-12	2.26556	5.48111e-08	down
FAM193A	1.46889e-06	1.25601	0.0395293	down
FAM20B	1.79005e-07	1.90538	0.0048172	down
FAM217A	7.51326e-07	1.9477	0.0202189	down
FAM220A	1.44182e-13	2.5856	3.88007e-09	down
FAM53B	1.43481e-11	2.59414	3.86122e-07	down
FASN	4.1885e-09	1.84316	0.000112717	down
FBH1	7.5481e-08	1.80617	0.00203127	down
FBRSL1	2.04228e-16	1.87183	5.49598e-12	down
FBXL19	1.16678e-10	1.46588	3.13993e-06	down
FBXL3	2.57727e-08	2.38829	0.000693569	down
FBXW4	7.87445e-13	2.55174	2.11909e-08	down
FCGRT	1.13949e-08	1.6603	0.000306648	down
FGD2	2.68142e-07	1.66015	0.00721598	down
FGD5	2.77837e-07	1.47384	0.00747688	down
FGF12	1.89696e-10	1.68866	5.10491e-06	down
FGGY	2.54627e-16	2.44501	6.85226e-12	down
FHOD3	1.41754e-09	1.59021	3.81474e-05	down
FLCN	9.98533e-13	3.08125	2.68715e-08	down
FLNA	2.53394e-08	1.8463	0.00068191	down
FLRT2	1.41237e-06	1.37843	0.0380082	down
FLT3LG	1.41406e-07	1.10123	0.00380539	down
FLT4	1.48646e-08	1.84069	0.000400021	down
FMN1	1.91944e-16	2.33924	5.1654e-12	down
FMN2	1.47304e-17	2.31665	3.96409e-13	down
FMNL2	7.62514e-07	1.79673	0.02052	down
FNDC10	3.0049e-09	2.42632	8.0865e-05	down
FOSB	1.51081e-09	2.09901	4.06574e-05	down
FOXM1	1.89247e-18	2.06851	5.09283e-14	down
FOXO3	2.96195e-09	1.83528	7.97089e-05	down
FOXO4	2.41203e-07	1.7182	0.00649101	down
FOXP4	9.73889e-07	1.65777	0.0262083	down
FUNDC2	4.65032e-08	2.24063	0.00125145	down
FUT10	1.42729e-07	1.63377	0.00384099	down
FZD6	2.08619e-07	1.91587	0.00561416	down
FZR1	3.29689e-12	2.39333	8.87226e-08	down
GAB1	1.92957e-13	2.29644	5.19265e-09	down
GAB2	9.46493e-07	1.63028	0.0254711	down
GAB4	3.85018e-08	1.95881	0.00103612	down
GABRR3	3.36147e-07	1.49585	0.00904606	down
GADL1	7.45318e-08	1.10093	0.00200572	down
GAN	1.65411e-09	1.66948	4.45138e-05	down
GAREM2	2.44115e-11	2.2891	6.56939e-07	down
GARNL3	1.4928e-07	1.46744	0.00401728	down
GAS7	2.99847e-10	1.71817	8.06918e-06	down
GBF1	4.25525e-09	1.60501	0.000114513	down
GDAP1	3.11473e-08	1.49913	0.000838204	down
GDI1	8.16787e-10	1.43506	2.19806e-05	down
GDPD4	6.7226e-07	1.49207	0.0180912	down
GDPD5	1.9221e-22	1.93841	5.17256e-18	down
GDPGP1	1.98179e-08	1.69823	0.000533319	down
GFRA1	9.99563e-08	1.45741	0.00268992	down
GGA1	1.2439e-07	2.24142	0.00334745	down
GID4	1.21881e-08	1.68723	0.000327994	down
GINS1	1.02812e-06	1.95611	0.0276677	down
GIT1	7.97501e-10	2.38485	2.14616e-05	down
GLIS2	1.75676e-13	3.05312	4.72762e-09	down
GLT1D1	9.44999e-09	2.05167	0.000254309	down
GLYATL3	6.25311e-08	2.47328	0.00168277	down
GLYR1	1.05266e-09	1.68028	2.83281e-05	down
GNA13	6.94265e-10	1.65414	1.86834e-05	down
GNB2	3.77794e-10	2.42107	1.01668e-05	down
GNE	3.59624e-07	1.14872	0.00967783	down
GNG5	6.42559e-07	1.54581	0.0172919	down
GOLGA7	3.8261e-13	1.99671	1.02964e-08	down
GOLIM4	1.58232e-07	1.60019	0.00425819	down
GP9	2.54919e-09	2.08243	6.86012e-05	down
GPBP1L1	8.99851e-07	1.13337	0.0242159	down
GPC6	1.32278e-11	1.73838	3.55975e-07	down
GPNMB	5.93806e-28	1.79362	1.59799e-23	down
GPR1	8.08701e-07	1.61362	0.021763	down
GPR137	2.96736e-09	1.96418	7.98547e-05	down
GPR158	9.92842e-07	1.74575	0.0267184	down
GPR19	8.03308e-30	1.626	2.16178e-25	down
GRB10	7.19262e-08	1.7007	0.00193561	down
GRB7	2.50671e-11	2.33764	6.74581e-07	down
GREM1	4.91706e-13	1.68416	1.32323e-08	down
GRHL2	1.38369e-06	1.50317	0.0372363	down
GRIK2	3.73768e-08	2.00387	0.00100585	down
GRIK4	2.70891e-08	1.71826	0.000728993	down
GRIN2B	2.29228e-08	1.56277	0.000616876	down
GRIP1	1.04496e-06	1.28869	0.0281208	down
GSE1	6.6674e-11	1.74491	1.79426e-06	down
GSK3A	2.52701e-08	2.22425	0.000680045	down
GSTM3	2.59082e-10	2.00715	6.97215e-06	down
GTF2F1	4.61708e-10	2.28465	1.2425e-05	down
GTF3C4	2.41691e-13	2.32191	6.50413e-09	down
GUCD1	2.50147e-07	1.88347	0.00673169	down
H2AFX	2.04305e-15	3.33412	5.49806e-11	down
HADH	8.05581e-07	1.71661	0.021679	down
HCFC1	1.68098e-08	1.52419	0.000452368	down
HCN2	4.52056e-16	2.97669	1.21653e-11	down
HCN4	1.83956e-06	1.79064	0.0495044	down
HDAC4	2.14435e-12	1.8092	5.77067e-08	down
HDGFL1	3.90467e-07	1.9177	0.0105079	down
HDLBP	8.99259e-08	1.60469	0.00242	down
HECTD4	6.43738e-08	1.47978	0.00173236	down
HID1	4.91866e-09	2.10707	0.000132366	down
HIPK1	1.48658e-08	2.15585	0.000400054	down
HIPK2	1.34944e-06	1.45913	0.0363149	down
HIST2H3A	1.61043e-30	3.77994	4.33383e-26	down
HIVEP1	1.20109e-08	1.70228	0.000323225	down
HMCN2	2.19795e-09	1.44668	5.9149e-05	down
HMG20A	2.01954e-10	1.92906	5.43479e-06	down
HMGA1	4.22942e-09	1.77336	0.000113818	down
HNRNPA1	1.14546e-18	1.98491	3.08253e-14	down
HNRNPA1L2	3.63129e-13	1.63328	9.77217e-09	down
HNRNPDL	7.64443e-08	1.11831	0.00205719	down
HNRNPL	3.28895e-07	1.81439	0.00885091	down
HNRNPLL	1.83637e-08	1.61533	0.000494187	down
HOMER1	7.50174e-10	2.38198	2.01879e-05	down
HSP90AA1	2.93368e-07	1.19253	0.00789483	down
HTRA3	9.32566e-09	2.80001	0.000250963	down
HTT	4.21948e-08	1.68211	0.0011355	down
IDS	2.97309e-14	2.84006	8.00088e-10	down
IER2	1.7341e-06	1.94592	0.0466664	down
IGSF9B	1.46507e-06	1.49191	0.0394266	down
IKZF4	5.29008e-07	1.6378	0.0142361	down
IL17RD	2.34815e-08	1.65643	0.000631911	down
IL34	1.44806e-06	1.98588	0.0389686	down
INCENP	4.44464e-19	3.12765	1.1961e-14	down
INO80E	2.18635e-11	1.95478	5.88368e-07	down
INPP5A	4.05409e-13	2.42769	1.091e-08	down
INPP5F	2.85555e-07	1.69446	0.00768457	down
INPP5J	1.6562e-09	1.98549	4.45699e-05	down
INTS5	1.19955e-07	1.92278	0.00322812	down
ITGA3	1.10303e-08	1.97761	0.000296836	down
ITGB4	5.6663e-07	1.47716	0.0152486	down
ITPR1	4.18522e-13	1.83435	1.12628e-08	down
IZUMO1R	5.38808e-14	2.44969	1.44999e-09	down
JAG2	3.7352e-07	1.58741	0.0100518	down
JAKMIP1	1.44023e-08	1.49478	0.000387579	down
JUP	1.59198e-09	1.76656	4.28419e-05	down
KALRN	4.67827e-10	1.65684	1.25897e-05	down
KANSL3	1.21387e-06	1.48645	0.0326665	down
KAT6A	1.20691e-09	1.63569	3.24791e-05	down
KBTBD2	8.14119e-07	1.63627	0.0219088	down
KCNC3	8.0024e-10	1.44378	2.15353e-05	down
KCNQ1	8.84953e-08	2.54125	0.0023815	down
KCTD2	2.0253e-07	1.70147	0.00545029	down
KCTD7	9.71798e-09	1.65116	0.00026152	down
KDF1	4.65835e-07	1.8807	0.0125361	down
KDM1B	7.08045e-12	1.93398	1.90542e-07	down
KIAA0355	2.74878e-09	1.83269	7.39724e-05	down
KIAA0513	5.22592e-09	2.43544	0.000140635	down
KIAA0825	9.14888e-14	2.30602	2.46205e-09	down
KIAA0930	1.04176e-06	1.70951	0.0280348	down
KIAA1191	2.05782e-10	1.53467	5.53779e-06	down
KIAA1328	6.90143e-15	2.63196	1.85724e-10	down
KIAA1522	1.69508e-06	1.71059	0.0456163	down
KIAA1549	2.51299e-10	1.91072	6.7627e-06	down
KIAA1958	1.72213e-07	2.01354	0.00463443	down
KIF13B	1.30141e-07	1.58891	0.00350222	down
KIFC1	3.72507e-07	1.3456	0.0100245	down
KLF11	2.41894e-10	1.90328	6.50961e-06	down
KLF12	1.7365e-08	1.91211	0.00046731	down
KLHDC4	1.54419e-07	1.65544	0.00415556	down
KLHL30	1.06048e-06	1.70399	0.0285385	down
KMT2B	4.20002e-12	2.26864	1.13027e-07	down
KMT2C	5.48757e-07	1.13161	0.0147676	down
KMT2D	9.35194e-13	2.0972	2.5167e-08	down
KSR1	1.52596e-10	1.9391	4.1065e-06	down
KSR2	7.55311e-09	1.85509	0.000203262	down
LAD1	7.36349e-09	2.07414	0.000198159	down
LAMA2	5.03772e-07	1.2505	0.013557	down
LAMC1	3.15256e-12	2.04425	8.48386e-08	down
LARP1	8.28691e-08	1.4539	0.00223009	down
LARP4	2.62525e-09	1.39008	7.0648e-05	down
LARS2	2.19583e-12	2.17333	5.90919e-08	down
LCN9	2.2637e-11	1.94409	6.09185e-07	down
LDLRAP1	1.10867e-06	2.11404	0.0298354	down
LENG8	1.21958e-07	1.34757	0.00328201	down
LIMK1	2.5559e-12	3.0758	6.87817e-08	down
LIMS2	5.93156e-13	2.88789	1.59624e-08	down
LINGO2	1.06334e-09	1.61588	2.86155e-05	down
LIPE	5.48756e-07	1.44029	0.0147676	down
LMTK2	1.07769e-07	1.57182	0.00290016	down
LOC100423594	7.81788e-10	2.97356	2.10387e-05	down
LOC100423617	1.10394e-16	1.61438	2.97081e-12	down
LOC100423698	1.06234e-08	1.53843	0.000285887	down
LOC100425035	9.99282e-07	1.31645	0.0268917	down
LOC100425124	2.61589e-07	1.60908	0.00703961	down
LOC100425403	1.4732e-12	2.97614	3.96453e-08	down
LOC100425544	1.64029e-12	2.63698	4.41417e-08	down
LOC100425770	4.01416e-07	1.22957	0.0108025	down
LOC100426608	8.13518e-07	1.44262	0.0218926	down
LOC100426633	5.96557e-13	2.4287	1.60539e-08	down
LOC100428066	2.24903e-07	1.65099	0.00605237	down
LOC100428894	1.18085e-21	1.87289	3.17778e-17	down
LOC100429047	2.46732e-12	2.2075	6.6398e-08	down
LOC100429190	1.13598e-11	1.85059	3.05703e-07	down
LOC100429965	3.54676e-07	2.00986	0.00954469	down
LOC100430023	1.30215e-07	1.93269	0.0035042	down
LOC100430086	1.7698e-06	1.93696	0.047627	down
LOC100430358	4.70926e-09	2.35507	0.000126731	down
LOC100430473	3.66138e-07	1.72259	0.00985314	down
LOC100430773	1.03354e-06	2.02258	0.0278136	down
LOC100430902	5.77691e-15	1.9774	1.55462e-10	down
LOC100431025	3.19913e-11	2.95677	8.60917e-07	down
LOC106992627	9.62437e-07	1.3282	0.0259001	down
LOC106992664	2.09796e-11	1.80751	5.64582e-07	down
LOC106993021	2.59107e-19	3.28441	6.97282e-15	down
LOC106993196	1.51552e-07	1.68678	0.00407842	down
LOC106993251	1.27788e-15	2.43146	3.4389e-11	down
LOC106993326	2.76259e-15	1.91586	7.43441e-11	down
LOC106993424	4.42434e-07	1.74935	0.0119063	down
LOC106993439	3.55063e-09	1.45817	9.55509e-05	down
LOC106993497	3.90244e-12	1.88397	1.05018e-07	down
LOC106993544	2.55329e-08	1.6445	0.000687116	down
LOC106993580	2.93252e-22	2.80351	7.89172e-18	down
LOC106993845	1.80637e-10	2.30371	4.86112e-06	down
LOC106993916	1.93496e-10	2.42406	5.20717e-06	down
LOC106994189	9.11766e-17	2.43179	2.45365e-12	down
LOC106994232	5.51875e-08	1.16299	0.00148515	down
LOC106994254	6.66053e-07	1.32156	0.0179242	down
LOC106994294	7.17836e-08	1.72096	0.00193177	down
LOC106994392	9.05713e-11	3.00077	2.43736e-06	down
LOC106994581	5.85463e-11	1.88228	1.57554e-06	down
LOC106994721	4.10854e-08	1.19311	0.00110565	down
LOC106994818	5.38956e-20	1.53673	1.45038e-15	down
LOC106995085	6.61145e-07	2.43884	0.0177921	down
LOC106995105	4.96562e-27	3.73498	1.3363e-22	down
LOC106995175	5.98981e-08	1.5733	0.00161192	down
LOC106995337	5.92367e-09	1.33066	0.000159412	down
LOC106995403	3.20854e-13	1.88945	8.63449e-09	down
LOC106995573	2.769e-21	3.01453	7.45167e-17	down
LOC106995708	2.53296e-10	3.05362	6.81644e-06	down
LOC106996105	1.50519e-21	1.78102	4.05062e-17	down
LOC106996153	6.40577e-09	2.69694	0.000172386	down
LOC106996240	5.81483e-09	1.71323	0.000156483	down
LOC106996277	9.94308e-09	2.78409	0.000267578	down
LOC106996503	6.09103e-10	1.54189	1.63916e-05	down
LOC106996507	2.45827e-08	1.40372	0.000661545	down
LOC106996620	1.14966e-14	1.58647	3.09386e-10	down
LOC106996741	3.44507e-07	2.42346	0.00927101	down
LOC106996803	1.38169e-06	1.45202	0.0371826	down
LOC106996992	1.38643e-09	1.96857	3.73101e-05	down
LOC106997079	4.39851e-14	2.33869	1.18368e-09	down
LOC106997283	1.81873e-32	1.85706	4.89438e-28	down
LOC106997335	4.49093e-08	2.43146	0.00120855	down
LOC106997408	5.03798e-08	1.81131	0.00135577	down
LOC106997411	2.7883e-07	2.17065	0.0075036	down
LOC106997496	1.98586e-11	2.4888	5.34414e-07	down
LOC106997731	1.07255e-09	2.56857	2.88633e-05	down
LOC106997882	9.52468e-07	1.56649	0.0256319	down
LOC106997951	4.44524e-19	1.82516	1.19626e-14	down
LOC106998127	9.7678e-17	1.50996	2.62861e-12	down
LOC106998199	6.63606e-10	2.50002	1.78583e-05	down
LOC106998584	5.96474e-08	1.68335	0.00160517	down
LOC106998625	6.58986e-11	1.10365	1.7734e-06	down
LOC106998755	2.05313e-22	1.92945	5.52518e-18	down
LOC106998878	9.37336e-12	2.33863	2.52247e-07	down
LOC106999101	1.48584e-06	1.5799	0.0399854	down
LOC106999140	1.12236e-13	1.51873	3.02039e-09	down
LOC106999357	1.39206e-06	1.52057	0.0374617	down
LOC106999418	6.50654e-09	2.0797	0.000175098	down
LOC106999549	5.75863e-09	1.66707	0.00015497	down
LOC106999670	9.32702e-10	1.99559	2.50999e-05	down
LOC106999673	9.81453e-09	1.32157	0.000264119	down
LOC106999705	4.24615e-10	1.9845	1.14268e-05	down
LOC106999725	7.70223e-10	3.13203	2.07275e-05	down
LOC107000092	7.26609e-07	1.38223	0.0195538	down
LOC107000223	1.32818e-07	1.86552	0.00357425	down
LOC107000344	1.45523e-06	1.5418	0.0391616	down
LOC107000425	7.97579e-07	1.43576	0.0214637	down
LOC107000440	1.56198e-07	1.53968	0.00420345	down
LOC107000481	6.25586e-11	1.50032	1.68351e-06	down
LOC107000560	3.27062e-09	1.49571	8.80156e-05	down
LOC107000717	2.65556e-12	2.1792	7.14637e-08	down
LOC107000817	3.4039e-17	4.13655	9.16025e-13	down
LOC107000858	4.32084e-09	1.98628	0.000116278	down
LOC114669717	5.89809e-13	1.58693	1.58724e-08	down
LOC114669830	3.85182e-26	4.20837	1.03656e-21	down
LOC114669867	1.12424e-10	1.4061	3.02544e-06	down
LOC114669955	3.38057e-07	2.9912	0.00909744	down
LOC114670013	1.82815e-17	1.71125	4.91975e-13	down
LOC114670036	2.63504e-10	2.04217	7.09117e-06	down
LOC114670040	1.23164e-11	2.7104	3.31447e-07	down
LOC114670057	1.03165e-06	2.4441	0.0277627	down
LOC114670305	2.69773e-10	1.96503	7.25987e-06	down
LOC114670521	8.06678e-07	1.83415	0.0217085	down
LOC114670545	1.89703e-08	2.16422	0.000510509	down
LOC114670864	1.61725e-10	1.36935	4.35217e-06	down
LOC114670927	1.90879e-07	1.16698	0.00513675	down
LOC114670940	7.60233e-07	2.08052	0.0204586	down
LOC114671522	3.36557e-08	2.31599	0.000905708	down
LOC114671705	2.90268e-07	1.50437	0.00781141	down
LOC114672246	7.80905e-14	1.5478	2.10149e-09	down
LOC114672261	1.62899e-09	1.70183	4.38379e-05	down
LOC114672615	3.24881e-08	2.12521	0.000874286	down
LOC114672701	1.79257e-14	2.34292	4.82399e-10	down
LOC114672760	5.88136e-12	2.69921	1.58273e-07	down
LOC114672772	1.34505e-10	1.18995	3.61966e-06	down
LOC114672859	1.18393e-12	2.00641	3.18607e-08	down
LOC114673167	5.30384e-07	2.20669	0.0142732	down
LOC114673684	3.73086e-31	1.7487	1.00401e-26	down
LOC114673698	1.45294e-11	2.2462	3.91001e-07	down
LOC114673703	9.44218e-14	2.63018	2.54098e-09	down
LOC114673711	6.77787e-08	1.60387	0.00182399	down
LOC114673714	5.47234e-08	1.62227	0.00147266	down
LOC114673717	1.29049e-15	2.2669	3.47284e-11	down
LOC114673730	4.40523e-07	1.61919	0.0118549	down
LOC114673767	3.12758e-23	1.70677	8.41664e-19	down
LOC114673795	3.63037e-14	2.91508	9.76968e-10	down
LOC114673818	1.7015e-10	2.05078	4.5789e-06	down
LOC114673955	8.9873e-12	2.56366	2.41857e-07	down
LOC114674057	1.1521e-06	1.8787	0.0310043	down
LOC114674162	2.24987e-20	4.24122	6.05462e-16	down
LOC114674216	1.57455e-06	1.50218	0.0423727	down
LOC114674275	1.08479e-11	1.92476	2.91929e-07	down
LOC114674294	1.95996e-10	1.48204	5.27444e-06	down
LOC114674302	1.19708e-11	3.28276	3.22146e-07	down
LOC114674330	1.04881e-10	1.6932	2.82244e-06	down
LOC114674354	1.50205e-75	2.11062	4.04218e-71	down
LOC114674404	1.16687e-07	1.46696	0.00314015	down
LOC114674432	5.29155e-08	1.42531	0.00142401	down
LOC114674534	6.06978e-17	4.69872	1.63344e-12	down
LOC114674667	3.91381e-19	2.49458	1.05325e-14	down
LOC114674813	1.2778e-18	1.76816	3.43868e-14	down
LOC114674933	6.76634e-20	2.83208	1.82089e-15	down
LOC114675047	5.72729e-12	2.34259	1.54127e-07	down
LOC114675364	1.1541e-14	2.55116	3.1058e-10	down
LOC114675366	1.15238e-31	3.38514	3.10118e-27	down
LOC114675372	2.97364e-11	2.69413	8.00236e-07	down
LOC114675416	3.00994e-08	1.6403	0.000810006	down
LOC114675431	5.14808e-07	1.28777	0.013854	down
LOC114675478	4.69199e-07	1.64899	0.0126266	down
LOC114675500	6.61039e-07	1.49087	0.0177892	down
LOC114675507	8.99386e-11	1.83642	2.42034e-06	down
LOC114675519	1.91513e-08	1.62742	0.000515382	down
LOC114675520	7.50685e-15	2.83881	2.02017e-10	down
LOC114675526	3.45088e-08	1.97881	0.000928667	down
LOC114675532	2.38533e-09	2.14393	6.41915e-05	down
LOC114675553	1.26848e-11	2.0119	3.4136e-07	down
LOC114675595	2.59417e-08	1.5507	0.000698118	down
LOC114675670	1.04796e-09	1.58401	2.82017e-05	down
LOC114675676	1.67126e-07	2.75735	0.00449753	down
LOC114675716	2.16799e-18	2.29714	5.83428e-14	down
LOC114675719	8.50005e-08	1.78331	0.00228745	down
LOC114675755	2.82527e-21	1.78983	7.60307e-17	down
LOC114675844	4.78916e-08	2.15235	0.00128881	down
LOC114675872	2.86556e-07	2.23633	0.0077115	down
LOC114676060	3.20091e-15	2.75212	8.61398e-11	down
LOC114676215	3.04899e-09	1.88938	8.20512e-05	down
LOC114676894	8.5696e-08	1.45364	0.00230616	down
LOC114676897	1.51301e-08	1.42163	0.000407165	down
LOC114676905	6.07811e-09	2.22647	0.000163568	down
LOC114676909	1.63811e-06	1.46094	0.0440831	down
LOC114676923	4.44858e-10	2.50478	1.19716e-05	down
LOC114677003	3.00237e-11	1.35875	8.07968e-07	down
LOC114677006	1.60125e-06	1.5371	0.0430912	down
LOC114677055	2.09486e-16	3.51507	5.63747e-12	down
LOC114677122	2.33116e-16	1.81747	6.27337e-12	down
LOC114677357	5.32976e-10	2.06424	1.43429e-05	down
LOC114677510	1.70221e-09	1.50812	4.58083e-05	down
LOC114677581	3.20069e-08	1.31729	0.000861338	down
LOC114677638	1.72872e-30	1.70217	4.65217e-26	down
LOC114677669	7.59118e-07	3.33448	0.0204286	down
LOC114677684	1.51962e-08	2.11336	0.000408944	down
LOC114678109	4.81698e-07	1.56596	0.012963	down
LOC114678188	5.43074e-07	1.48485	0.0146147	down
LOC114678790	4.2294e-17	2.69668	1.13817e-12	down
LOC114678791	1.41516e-20	2.99334	3.80834e-16	down
LOC114678993	1.46612e-07	2.33772	0.00394546	down
LOC114679003	5.09591e-23	3.7447	1.37136e-18	down
LOC114679054	4.40934e-07	2.10895	0.011866	down
LOC114679255	4.04011e-07	1.50024	0.0108723	down
LOC114679282	3.64674e-22	5.63451	9.81375e-18	down
LOC114679293	2.04607e-07	1.40315	0.00550617	down
LOC114679305	4.63081e-13	2.08715	1.2462e-08	down
LOC114679327	8.28159e-11	2.33752	2.22866e-06	down
LOC114679448	5.70398e-08	1.38116	0.001535	down
LOC114680116	3.30894e-10	1.22805	8.90468e-06	down
LOC114680141	1.14358e-08	2.02551	0.000307749	down
LOC114680150	5.09145e-12	2.30708	1.37016e-07	down
LOC114680165	5.18905e-13	2.63063	1.39643e-08	down
LOC114680252	2.2231e-09	1.32412	5.98259e-05	down
LOC114680325	3.73538e-08	1.69002	0.00100523	down
LOC114680422	3.71567e-07	2.4296	0.00999923	down
LOC114680423	1.48809e-11	3.60129	4.0046e-07	down
LOC693343	1.4935e-11	1.57659	4.01915e-07	down
LOC693399	4.65848e-07	1.42011	0.0125364	down
LOC693849	7.20332e-21	2.13875	1.93849e-16	down
LOC693939	8.90018e-24	2.21105	2.39513e-19	down
LOC694744	2.81296e-13	2.36428	7.56995e-09	down
LOC694864	5.8893e-11	2.07348	1.58487e-06	down
LOC695670	3.12315e-07	1.9704	0.0084047	down
LOC695751	2.31533e-12	2.13817	6.23079e-08	down
LOC695755	5.41848e-08	1.61837	0.00145817	down
LOC695844	9.35192e-07	2.4475	0.0251669	down
LOC696015	4.89143e-09	1.58902	0.000131633	down
LOC697149	3.6141e-14	2.56251	9.7259e-10	down
LOC697437	2.48538e-08	1.28427	0.00066884	down
LOC697467	2.90007e-09	1.58335	7.80437e-05	down
LOC697721	1.41536e-13	3.15587	3.80887e-09	down
LOC697783	3.02864e-08	2.09012	0.000815038	down
LOC698139	5.81397e-09	1.33537	0.00015646	down
LOC698297	1.80327e-12	2.02816	4.85277e-08	down
LOC698547	5.35679e-20	2.09181	1.44157e-15	down
LOC698693	1.74397e-07	2.07831	0.00469321	down
LOC699029	2.98626e-07	2.32133	0.00803633	down
LOC699117	3.01138e-07	1.16805	0.00810392	down
LOC699299	6.31147e-07	1.3542	0.0169848	down
LOC700765	1.71185e-10	2.10436	4.60675e-06	down
LOC700786	4.51494e-16	1.7631	1.21502e-11	down
LOC700862	2.67693e-16	2.24338	7.2039e-12	down
LOC701457	1.25763e-11	1.53269	3.3844e-07	down
LOC701983	2.01513e-07	2.13168	0.00542291	down
LOC704758	2.24773e-08	1.83487	0.000604886	down
LOC705220	6.01652e-15	2.52312	1.6191e-10	down
LOC705465	8.66074e-08	1.39315	0.00233069	down
LOC705546	3.19313e-08	2.40615	0.000859304	down
LOC705671	5.97363e-11	1.45828	1.60756e-06	down
LOC705681	1.01617e-11	1.58704	2.73462e-07	down
LOC706213	4.69365e-13	1.68699	1.26311e-08	down
LOC707323	1.07642e-07	2.6721	0.00289676	down
LOC707437	1.27778e-07	1.48413	0.00343865	down
LOC708085	5.94073e-16	1.52034	1.59871e-11	down
LOC708375	2.15774e-07	1.20084	0.00580669	down
LOC708539	1.76706e-08	1.34891	0.000475534	down
LOC708603	6.62581e-09	1.56302	0.000178307	down
LOC708891	1.06653e-07	1.52773	0.00287015	down
LOC709054	5.30538e-07	1.51931	0.0142773	down
LOC709619	1.49991e-07	3.63956	0.00403641	down
LOC710038	3.28151e-08	1.63736	0.000883087	down
LOC710059	5.06025e-12	1.49448	1.36176e-07	down
LOC710545	9.21231e-10	1.79949	2.47912e-05	down
LOC710773	2.37506e-14	1.23832	6.39152e-10	down
LOC711182	6.94901e-07	1.41959	0.0187005	down
LOC711295	2.33474e-08	1.54041	0.000628302	down
LOC711890	2.1667e-11	2.88725	5.83081e-07	down
LOC712156	5.80128e-16	1.72277	1.56118e-11	down
LOC712203	3.20498e-07	2.34976	0.00862492	down
LOC712263	5.94683e-07	1.16637	0.0160035	down
LOC712631	1.95631e-09	1.97803	5.26462e-05	down
LOC712822	2.74816e-07	1.54248	0.00739558	down
LOC713683	4.19462e-13	2.98932	1.12881e-08	down
LOC713776	2.49849e-12	1.40099	6.7237e-08	down
LOC714022	5.67384e-07	1.18905	0.0152689	down
LOC714171	2.29076e-07	1.22992	0.00616468	down
LOC714503	1.76668e-12	1.75768	4.75433e-08	down
LOC714656	1.36346e-08	1.66921	0.00036692	down
LOC715131	6.55653e-15	2.6108	1.76443e-10	down
LOC715912	1.69806e-16	2.05119	4.56964e-12	down
LOC716147	7.0066e-12	1.59401	1.88555e-07	down
LOC716204	2.57681e-15	1.93432	6.93444e-11	down
LOC716221	2.30017e-07	2.03159	0.00618997	down
LOC717080	1.37429e-09	2.92064	3.69834e-05	down
LOC717478	5.81672e-14	1.53242	1.56534e-09	down
LOC717494	2.19701e-07	1.19017	0.00591238	down
LOC718070	5.8901e-08	1.2066	0.00158509	down
LOC718594	1.35827e-24	1.777	3.65525e-20	down
LOC719632	8.57174e-17	1.79726	2.30674e-12	down
LOC719690	5.40933e-11	1.45942	1.4557e-06	down
LOC720055	4.35456e-07	1.36578	0.0117186	down
LOC720355	2.76873e-16	1.77484	7.45093e-12	down
LOC720371	6.13972e-12	3.64498	1.65226e-07	down
LOC720388	1.66678e-07	2.09039	0.00448547	down
LOC720392	8.02876e-18	1.74629	2.16062e-13	down
LOC720402	8.58861e-11	2.39734	2.31128e-06	down
LOC720502	5.21197e-07	1.43473	0.0140259	down
LOC722081	2.30772e-09	1.72476	6.21031e-05	down
LOC722195	2.7106e-08	1.88796	0.00072945	down
LOC722798	1.03274e-11	2.39204	2.7792e-07	down
LPCAT4	3.21143e-14	2.71298	8.64229e-10	down
LRFN2	5.04926e-07	1.38315	0.0135881	down
LRMDA	5.96019e-08	1.37698	0.00160395	down
LRRC23	9.45576e-10	2.8222	2.54464e-05	down
LRRC32	1.58759e-07	1.5049	0.00427235	down
LRRC4B	1.17632e-12	2.47592	3.16561e-08	down
LRRC8A	2.14349e-11	1.9504	5.76834e-07	down
LRRC8B	7.95234e-11	2.46726	2.14005e-06	down
LRRC8E	6.2383e-10	1.31751	1.67879e-05	down
LRRN1	2.72681e-10	2.26381	7.33811e-06	down
LY6G6C	3.15893e-07	4.46005	0.008501	down
LY86	4.44117e-07	1.31663	0.0119516	down
LYPD1	4.86814e-23	6.2572	1.31007e-18	down
MACF1	7.95793e-11	1.7605	2.14156e-06	down
MACO1	8.87956e-10	1.91626	2.38958e-05	down
MAEA	3.3626e-10	1.55444	9.04909e-06	down
MAGT1	1.78253e-07	2.00263	0.00479697	down
MALRD1	5.51258e-10	2.05943	1.48349e-05	down
MAP1S	4.92427e-08	1.98806	0.00132517	down
MAP2K1	1.27557e-08	1.81532	0.000343268	down
MAP3K9	3.6057e-08	1.63983	0.000970331	down
MAP4K2	2.62546e-07	1.88192	0.00706538	down
MAP7	4.57692e-10	2.05216	1.2317e-05	down
MAPK8	4.27498e-07	1.45754	0.0115044	down
MAPK9	1.7121e-10	2.01515	4.60744e-06	down
MAPKBP1	7.45356e-08	1.64514	0.00200583	down
2025-03-01	8.13837e-08	2.06124	0.00219012	down
2025-03-10	6.39687e-11	1.66601	1.72146e-06	down
MARK2	2.08522e-14	2.27992	5.61153e-10	down
MARK4	4.11076e-07	1.91408	0.0110625	down
MAST2	6.69023e-11	2.05096	1.80041e-06	down
MAX	3.9717e-08	1.1746	0.00106882	down
MBD5	1.83761e-06	1.19109	0.0494519	down
MCF2L	1.19264e-10	1.86304	3.20951e-06	down
MCM3AP	2.06948e-09	1.61116	5.56918e-05	down
MECP2	4.75451e-07	1.5406	0.0127949	down
MED12L	2.79713e-11	1.63131	7.52735e-07	down
MED13	4.18594e-09	1.87382	0.000112648	down
MED14	2.00621e-10	2.04623	5.39891e-06	down
MED15	2.02463e-09	1.54486	5.44848e-05	down
MED16	6.90014e-11	2.55329	1.8569e-06	down
MED25	8.21013e-14	2.34691	2.20943e-09	down
MEX3D	9.72773e-08	1.53007	0.00261783	down
MFAP3	1.33438e-11	2.19632	3.59095e-07	down
MFSD13A	1.82844e-09	2.31441	4.92052e-05	down
MFSD6	3.7101e-07	2.06205	0.00998426	down
MGAM	7.01456e-12	1.68908	1.88769e-07	down
MGAT4A	1.75043e-06	1.41451	0.0471059	down
MGAT4B	2.34734e-11	2.49688	6.31694e-07	down
MGRN1	1.61795e-11	2.13278	4.35407e-07	down
MICALL2	1.15502e-10	1.86554	3.10827e-06	down
MIDN	1.74825e-12	2.17849	4.70472e-08	down
MILR1	1.2669e-10	2.65248	3.40935e-06	down
MINK1	2.88855e-08	1.78437	0.000777339	down
MKNK2	3.87663e-14	2.55712	1.04324e-09	down
MLH1	3.15968e-08	1.82346	0.000850302	down
MLPH	1.47017e-13	1.72221	3.95637e-09	down
MLXIP	4.10809e-09	2.00593	0.000110553	down
MOCS1	6.48284e-15	2.20738	1.7446e-10	down
MORF4L1	1.67626e-08	1.41913	0.000451099	down
MPIG6B	8.23848e-14	3.8204	2.21706e-09	down
MPP2	2.88319e-07	2.12351	0.00775894	down
MPP7	2.67118e-08	1.99503	0.00071884	down
MPRIP	1.92402e-08	1.5207	0.000517773	down
MRAS	8.96421e-12	1.58629	2.41236e-07	down
MRPS21	1.16849e-08	2.0367	0.000314451	down
MRTFA	4.262e-13	1.79681	1.14695e-08	down
MRTFB	4.05986e-09	1.4608	0.000109255	down
MRVI1	9.55319e-07	1.49044	0.0257086	down
MTMR3	2.3878e-19	2.69616	6.42581e-15	down
MTMR7	4.46679e-13	2.01136	1.20206e-08	down
MTSS1	4.61999e-09	1.59979	0.000124329	down
MTUS1	5.66806e-10	1.39341	1.52533e-05	down
MTUS2	7.81352e-11	1.44358	2.1027e-06	down
MYBL2	1.65891e-08	1.95535	0.000446428	down
MYO18B	2.24742e-09	1.71047	6.04803e-05	down
MYO19	1.61556e-10	1.73998	4.34764e-06	down
MYO1C	1.73034e-08	1.8242	0.000465651	down
MYO7A	1.13674e-06	1.37494	0.0305908	down
NAT10	5.95074e-08	1.5581	0.0016014	down
NCAN	7.20408e-08	1.79479	0.00193869	down
NCAPH	7.83792e-13	2.36033	2.10926e-08	down
NCK2	2.95891e-12	2.5229	7.96273e-08	down
NCKIPSD	1.27109e-06	2.20621	0.0342062	down
NCOA2	3.82474e-15	2.46176	1.02928e-10	down
NCOA6	3.53997e-08	2.00912	0.00095264	down
NCOR2	3.93562e-10	1.97619	1.05911e-05	down
NDC1	2.66376e-08	1.86326	0.000716844	down
NDE1	4.98288e-12	2.29231	1.34094e-07	down
NDOR1	6.10302e-09	2.34692	0.000164238	down
NDRG3	1.37313e-07	2.04062	0.00369523	down
NEDD4L	1.05102e-15	2.71435	2.82839e-11	down
NELFA	8.43848e-09	1.41206	0.000227088	down
NF1	7.80913e-13	1.88864	2.10151e-08	down
NFATC2	4.12171e-16	2.67302	1.10919e-11	down
NHLRC2	7.613e-07	1.42688	0.0204873	down
NKD1	8.68669e-10	1.84055	2.33768e-05	down
NKX3-1	6.43066e-09	2.4256	0.000173055	down
NLRP2	1.74972e-06	1.29136	0.0470866	down
NLRP9	8.53844e-07	1.45869	0.0229778	down
NME1	8.55025e-10	2.1899	2.30096e-05	down
NME6	2.35236e-08	1.75072	0.000633043	down
NMUR1	1.43315e-08	1.72788	0.000385675	down
NOL4L	3.16009e-12	2.39718	8.50412e-08	down
NOTCH1	1.10739e-09	1.83361	2.98009e-05	down
NPAS1	1.72105e-06	1.70312	0.0463152	down
NPC1	6.95312e-12	2.3301	1.87116e-07	down
NPM3	8.51911e-15	3.41483	2.29258e-10	down
NR3C2	2.50215e-08	1.57069	0.000673353	down
NRG1	1.73745e-06	1.90285	0.0467565	down
NRSN2	1.54491e-16	1.68285	4.1575e-12	down
NSD2	8.38054e-07	1.25618	0.0225529	down
NSG2	9.3737e-08	2.00336	0.00252256	down
NSUN6	1.36255e-07	1.10091	0.00366677	down
NUDT16	3.358e-07	2.33818	0.0090367	down
NUP188	7.98268e-08	1.34527	0.00214822	down
NUP210	2.82175e-13	1.66239	7.59361e-09	down
NUP43	2.4322e-10	2.71605	6.54529e-06	down
NUP54	5.73624e-07	1.45179	0.0154368	down
NUTF2	1.32669e-06	1.61688	0.0357026	down
OIP5	3.20292e-09	1.61169	8.61938e-05	down
OLA1	5.14357e-09	2.02358	0.000138419	down
OOEP	2.08023e-09	1.86675	5.5981e-05	down
OOSP4B	9.43474e-13	2.59078	2.53898e-08	down
OR2A25	3.55164e-10	3.14148	9.55782e-06	down
OR2D3	2.76284e-07	2.99061	0.00743509	down
OR7E24	6.09906e-09	2.07426	0.000164132	down
OS9	8.79718e-08	1.80993	0.00236741	down
OSBP2	1.81372e-06	1.20836	0.0488089	down
OSBPL3	4.17902e-07	1.43093	0.0112462	down
OTUB1	5.27521e-07	1.4096	0.0141961	down
OTUB2	2.11582e-10	1.58804	5.69389e-06	down
OTUD4	6.04174e-16	2.57178	1.62589e-11	down
OTUD5	1.80206e-11	1.81096	4.84952e-07	down
OTUD7A	9.94625e-11	1.7616	2.67664e-06	down
OTUD7B	1.01377e-10	2.34543	2.72816e-06	down
OXCT1	3.97284e-09	1.57558	0.000106913	down
PABPC1L	1.21663e-10	2.85227	3.27409e-06	down
PACS1	4.15812e-10	1.96239	1.11899e-05	down
PADI6	1.18457e-08	1.38669	0.00031878	down
PAIP2	1.4459e-06	1.15916	0.0389106	down
PAK1	1.25453e-09	2.12272	3.37606e-05	down
PAN3	9.1816e-08	1.99509	0.00247086	down
PAPLN	4.41614e-07	1.68095	0.0118843	down
PAQR7	3.22779e-16	2.94035	8.68631e-12	down
PAQR8	1.27287e-06	1.30549	0.0342543	down
PARP12	4.02822e-07	1.60568	0.0108403	down
PARVB	5.97897e-09	2.50734	0.0001609	down
PATL1	4.63427e-07	1.35629	0.0124713	down
PCBP1	2.56478e-07	2.00227	0.00690207	down
PCBP2	8.7683e-13	3.23972	2.35964e-08	down
PCBP3	2.59768e-08	1.92781	0.000699062	down
PCDH19	1.42645e-06	1.76587	0.0383872	down
PCGF2	5.90091e-08	1.4911	0.00158799	down
PCLO	6.04076e-10	1.84144	1.62563e-05	down
PCNX3	2.0577e-07	1.8646	0.00553747	down
PCP4L1	1.49246e-09	1.97144	4.01637e-05	down
PCYOX1L	5.67733e-09	2.74073	0.000152782	down
PDAP1	8.21419e-07	1.35435	0.0221052	down
PDE8B	8.23747e-08	1.35215	0.00221678	down
PDPR	1.7085e-07	1.77039	0.00459776	down
PEAK1	4.15357e-10	1.70398	1.11777e-05	down
PEF1	1.55473e-06	1.79422	0.0418395	down
PEG3	1.9939e-07	1.30515	0.00536578	down
PELP1	7.8092e-21	3.71997	2.10153e-16	down
PEX11A	3.57673e-07	2.04851	0.00962535	down
PFKP	4.16391e-10	2.27275	1.12055e-05	down
PFN1	2.62817e-08	1.22543	0.000707266	down
PGD	2.70103e-10	2.10987	7.26873e-06	down
PHETA1	9.27029e-08	1.72535	0.00249473	down
PHF1	1.0533e-07	2.16263	0.00283454	down
PHF3	7.55239e-10	1.59315	2.03242e-05	down
PHF6	8.63821e-09	1.516	0.000232463	down
PHLDB1	3.29317e-07	1.83548	0.00886224	down
PHRF1	2.2124e-10	2.07956	5.9538e-06	down
PI4KA	4.3575e-07	1.47618	0.0117265	down
PIAS4	2.32279e-11	1.77325	6.25085e-07	down
PIEZO1	1.13235e-10	1.81267	3.04727e-06	down
PIGA	1.27918e-07	1.3961	0.0034424	down
PIGC	2.54805e-07	1.94359	0.00685706	down
PIGU	1.18026e-09	1.54963	3.17621e-05	down
PIGX	1.21597e-11	2.72299	3.27231e-07	down
PIK3R2	4.07194e-08	1.66922	0.0010958	down
PIK3R5	6.7214e-07	1.66139	0.018088	down
PIK3R6	5.00261e-12	1.9183	1.34625e-07	down
PIP4K2A	1.16805e-07	1.77183	0.00314333	down
PIP4K2B	1.13086e-07	1.45109	0.00304325	down
PITPNM3	4.27283e-07	1.87242	0.0114986	down
PKD1	9.15847e-07	1.60894	0.0246464	down
PLA2G6	2.19231e-08	1.98158	0.000589973	down
PLAGL2	3.74029e-13	2.03445	1.00655e-08	down
PLAUR	2.28086e-12	2.13979	6.13802e-08	down
PLCB3	1.32819e-08	2.031	0.00035743	down
PLCG1	6.82106e-10	2.25166	1.83562e-05	down
PLD2	1.80074e-06	1.51332	0.0484596	down
PLEKHB1	1.18287e-07	1.93792	0.00318323	down
PLEKHG3	1.52946e-09	2.10415	4.11592e-05	down
PLEKHG6	5.75839e-11	2.73267	1.54964e-06	down
PLEKHM1	1.61805e-10	2.25983	4.35432e-06	down
PLS1	2.78136e-15	1.92248	7.48492e-11	down
PLXNA4	7.73364e-09	1.46104	0.00020812	down
PNMA6F	1.13649e-07	2.17653	0.00305841	down
PNPLA2	9.12824e-13	2.71029	2.4565e-08	down
PNPLA7	3.26988e-08	1.89626	0.000879957	down
POGZ	2.52527e-09	1.78581	6.79576e-05	down
POLA1	3.39962e-11	2.1922	9.14871e-07	down
POM121C	3.88109e-08	1.44518	0.00104444	down
POM121L12	3.52848e-14	1.76244	9.49548e-10	down
POR	2.61297e-10	2.26495	7.03176e-06	down
POU5F1	5.52964e-07	1.37687	0.0148808	down
PPARA	2.73502e-15	1.57358	7.36022e-11	down
PPDPF	5.42875e-09	1.93349	0.000146093	down
PPFIA1	1.85436e-08	1.62261	0.000499027	down
PPIB	4.51844e-08	2.18112	0.00121596	down
PPP1CC	1.74377e-06	1.04442	0.0469266	down
PPP1R13B	1.04771e-09	1.89541	2.8195e-05	down
PPP1R15B	6.8771e-12	1.92986	1.8507e-07	down
PPP1R3C	2.78018e-10	3.35483	7.48175e-06	down
PPP1R3D	6.42755e-08	1.87261	0.00172972	down
PPP1R8	1.45377e-06	2.01878	0.0391225	down
PPP2CB	1.76801e-13	1.56449	4.75789e-09	down
PPP2R1A	9.31519e-07	1.78345	0.0250681	down
PPP2R2C	9.29173e-09	2.36366	0.00025005	down
PPP3CC	4.60266e-51	1.97025	1.23862e-46	down
PPP6C	1.09844e-07	1.65476	0.002956	down
PPP6R1	1.40653e-07	2.1663	0.00378511	down
PPRC1	2.02475e-12	1.67987	5.4488e-08	down
PRAM1	1.37092e-09	1.26753	3.68929e-05	down
PRCC	4.52999e-09	1.6999	0.000121906	down
PRDM10	1.40206e-08	1.78359	0.000377307	down
PREB	3.42285e-08	1.86119	0.000921122	down
PROCR	1.81822e-06	2.67102	0.0489301	down
PRPF19	3.93627e-14	3.39666	1.05929e-09	down
PRR14	3.75975e-11	2.39203	1.01179e-06	down
PRR19	2.52592e-10	1.82954	6.79751e-06	down
PRR36	2.80167e-13	2.58444	7.53957e-09	down
PRRC2B	5.30147e-10	1.98492	1.42668e-05	down
PSAP	4.80596e-13	3.23168	1.29333e-08	down
PSD2	5.55474e-10	2.29127	1.49484e-05	down
PSMD14	2.75224e-07	2.18648	0.00740654	down
PSTPIP2	1.07782e-06	2.09608	0.0290053	down
PTBP3	1.29937e-07	1.29333	0.00349674	down
PTPN23	1.42811e-09	2.43011	3.84319e-05	down
PTPRK	2.3276e-17	2.31016	6.2638e-13	down
PTPRR	2.73059e-08	1.66728	0.00073483	down
PTPRZ1	3.3451e-19	1.9812	9.00199e-15	down
PUDP	4.7503e-09	1.72588	0.000127835	down
PYGO2	3.88514e-07	1.79241	0.0104553	down
QSER1	2.77185e-11	2.0448	7.45931e-07	down
QSOX1	8.10546e-07	1.42095	0.0218126	down
RAB15	3.99873e-09	1.92037	0.00010761	down
RAB1B	7.2156e-08	1.61801	0.00194179	down
RAB3IL1	5.04688e-21	1.71717	1.35816e-16	down
RAB6B	8.72867e-07	2.2271	0.0234897	down
RAB7A	3.02009e-07	1.17735	0.00812737	down
RABIF	6.61261e-11	2.56648	1.77952e-06	down
RAC2	4.04522e-08	1.58194	0.00108861	down
RAD21	1.36038e-08	1.56852	0.000366092	down
RARA	2.47057e-09	2.44284	6.64856e-05	down
RASA3	1.53719e-06	1.38214	0.0413674	down
RASGRP1	1.51881e-07	1.6449	0.00408728	down
RASGRP2	4.32754e-08	1.43364	0.00116458	down
RASSF5	1.6127e-06	1.69138	0.0433995	down
RAVER1	9.88706e-10	2.28507	2.66071e-05	down
RBBP5	1.75178e-11	1.42603	4.71422e-07	down
RBBP7	1.50336e-07	1.32297	0.0040457	down
RBM15B	3.58178e-08	2.02548	0.000963893	down
RBM33	4.11197e-07	1.28945	0.0110657	down
RBM38	2.11933e-11	2.85711	5.70333e-07	down
RBMX2	3.28172e-07	1.32656	0.00883143	down
RCOR1	5.28707e-08	1.73641	0.0014228	down
RDH13	3.04752e-12	2.4591	8.20117e-08	down
RERE	5.53668e-08	1.35538	0.00148998	down
RETREG2	1.68118e-09	2.74352	4.52421e-05	down
REXO1	4.60078e-08	2.16554	0.00123812	down
RFX1	7.60422e-10	1.92591	2.04637e-05	down
RGMA	2.79349e-11	2.47524	7.51757e-07	down
RHPN2	6.48215e-10	1.74537	1.74441e-05	down
RIC8B	1.44759e-06	2.00471	0.038956	down
RIMS3	1.04161e-11	2.4676	2.80308e-07	down
RIN3	6.33502e-10	2.06093	1.70482e-05	down
RING1	8.04909e-08	2.0459	0.00216609	down
RIPOR2	1.13245e-08	1.68844	0.000304753	down
RMND5A	9.88592e-11	1.98933	2.6604e-06	down
RNASEK	3.24375e-07	2.27083	0.00872927	down
RND1	7.03826e-08	1.94215	0.00189407	down
RNF111	9.42562e-08	1.13363	0.00253653	down
RNF114	1.86012e-11	2.16294	5.00577e-07	down
RNF126	1.14529e-08	1.81001	0.000308209	down
RNF14	2.41928e-09	2.13306	6.51053e-05	down
RNF144A	2.4147e-09	1.47967	6.4982e-05	down
RNF180	4.99182e-08	1.75804	0.00134335	down
RNF185	4.73342e-07	1.91635	0.0127381	down
RNF187	3.27431e-07	2.08271	0.0088115	down
RNF19B	7.58904e-17	3.43713	2.04229e-12	down
RNF31	1.47685e-06	1.87626	0.0397435	down
RNFT1	4.28624e-07	2.17027	0.0115347	down
RPN1	4.35721e-15	2.54642	1.17257e-10	down
RRM2	3.38996e-09	1.91586	9.12272e-05	down
RTEL1	1.56945e-11	2.5961	4.22354e-07	down
RUNX1	4.0189e-13	2.20495	1.08153e-08	down
S100PBP	5.05181e-09	2.42257	0.000135949	down
SALL2	1.08146e-09	1.92017	2.91031e-05	down
SAMD4A	8.39657e-12	2.30641	2.2596e-07	down
SAMD4B	1.14574e-08	1.89656	0.00030833	down
SAP130	3.45052e-09	1.27447	9.2857e-05	down
SARDH	5.3749e-13	2.02113	1.44644e-08	down
SATB1	3.98468e-12	2.7662	1.07232e-07	down
SBF1	2.93816e-16	2.45242	7.90688e-12	down
SCAF1	3.41639e-15	1.96892	9.19384e-11	down
SCAMP4	9.61516e-10	2.3624	2.58754e-05	down
SCAP	3.65889e-08	2.20203	0.000984644	down
SCIMP	6.44766e-07	2.23127	0.0173513	down
SCMH1	1.16137e-07	1.85251	0.00312536	down
SDR42E2	9.9793e-09	1.67524	0.000268553	down
SEC14L1	1.45543e-08	1.62873	0.00039167	down
SEC24A	1.35687e-13	2.31289	3.65146e-09	down
SECISBP2L	4.32648e-07	1.22036	0.011643	down
SELENON	6.74242e-08	1.97139	0.00181445	down
SEMA4D	5.42783e-08	1.88943	0.00146068	down
SENP2	3.31955e-07	1.92002	0.00893325	down
SENP3	9.93916e-07	1.6998	0.0267473	down
SEPTIN9	3.55346e-09	2.10684	9.56272e-05	down
SESN3	6.23365e-24	3.6735	1.67754e-19	down
SETBP1	8.03008e-08	1.53815	0.00216098	down
SETD1B	5.86554e-10	2.06002	1.57847e-05	down
SETDB1	6.03601e-08	2.0052	0.00162435	down
SF3A1	1.19466e-06	1.16422	0.0321496	down
SF3A2	1.06827e-06	1.92827	0.0287483	down
SGCD	1.66294e-06	1.22657	0.0447514	down
SGMS2	1.19859e-08	2.07402	0.000322552	down
SH2B1	5.28047e-07	1.75987	0.0142103	down
SH3D19	8.91883e-35	1.77233	2.40015e-30	down
SH3RF1	2.65456e-08	1.7241	0.00071437	down
SHD	1.36611e-11	2.86219	3.67633e-07	down
SHROOM3	2.27876e-10	2.06132	6.13238e-06	down
SIAH3	8.83569e-10	2.01261	2.37777e-05	down
SIGMAR1	7.37155e-10	2.37233	1.98376e-05	down
SIPA1L1	5.68704e-12	1.79592	1.53044e-07	down
SIRT3	7.77258e-20	1.6428	2.09168e-15	down
SKAP1	2.77255e-07	1.27448	0.00746121	down
SLC12A5	1.21849e-07	1.77308	0.00327907	down
SLC12A6	1.28647e-06	1.47569	0.0346203	down
SLC12A8	3.26415e-11	2.18452	8.78415e-07	down
SLC13A3	4.93262e-07	1.94678	0.0132742	down
SLC15A3	4.92241e-10	2.44298	1.32467e-05	down
SLC16A14	6.21968e-07	1.68427	0.0167378	down
SLC17A8	2.75146e-11	2.06581	7.40445e-07	down
SLC22A23	7.71428e-24	1.77267	2.07599e-19	down
SLC24A2	7.2759e-11	1.51332	1.95802e-06	down
SLC25A35	5.22167e-08	1.8074	0.0014052	down
SLC25A36	1.86367e-21	3.13098	5.01533e-17	down
SLC25A46	1.54649e-06	2.0429	0.0416175	down
SLC25A48	8.77342e-07	2.14543	0.0236102	down
SLC25A51	1.35106e-06	2.18175	0.0363584	down
SLC26A1	2.15377e-08	2.03005	0.0005796	down
SLC30A5	5.40339e-12	1.93906	1.45411e-07	down
SLC44A3	9.40278e-14	2.10368	2.53038e-09	down
SLC4A2	1.93228e-08	2.31459	0.000519995	down
SLC5A11	6.91905e-07	1.76492	0.0186199	down
SLC7A2	1.36576e-09	1.89924	3.67541e-05	down
SLC7A5	3.95993e-19	2.88512	1.06566e-14	down
SLC7A8	6.37071e-08	1.39293	0.00171442	down
SLC9A1	9.28017e-08	2.00206	0.00249739	down
SLC9A7	2.0044e-07	2.54063	0.00539404	down
SLIT1	1.57114e-07	1.4155	0.0042281	down
SLIT3	5.20532e-13	2.50573	1.4008e-08	down
SMARCD1	6.75873e-08	1.52282	0.00181884	down
SMCO4	2.23425e-13	2.09384	6.0126e-09	down
SMIM8	1.41038e-11	2.34374	3.79548e-07	down
SMN1	6.01351e-09	1.62023	0.00016183	down
SMPD3	5.52354e-11	1.70505	1.48644e-06	down
SMPD4	1.80813e-08	1.66281	0.000486585	down
SMTNL2	1.57416e-06	1.63694	0.0423622	down
SMURF1	1.28027e-07	1.89196	0.00344534	down
SNAP23	3.48646e-07	1.94292	0.00938241	down
SNRNP70	3.36031e-10	2.15225	9.04292e-06	down
SNX5	3.56948e-09	1.85308	9.60583e-05	down
SP2	1.26073e-06	1.37689	0.0339274	down
SP7	1.10122e-06	1.28118	0.029635	down
SPATA2	6.32714e-10	1.95781	1.7027e-05	down
SPHKAP	1.87009e-15	2.14121	5.03259e-11	down
SPINDOC	1.8226e-15	3.23315	4.9048e-11	down
SPIRE1	6.69942e-07	1.62118	0.0180288	down
SPON1	2.55168e-07	1.62141	0.00686683	down
SPPL2A	4.89563e-22	1.6075	1.31746e-17	down
SPPL2B	7.77746e-08	1.6972	0.00209299	down
SPTB	1.04457e-11	2.09433	2.81105e-07	down
SPTSSB	5.37993e-17	2.13704	1.44779e-12	down
SREBF2	1.07893e-11	2.41258	2.90352e-07	down
SRRM2	8.20232e-11	1.82428	2.20733e-06	down
SRSF1	2.77842e-11	1.02408	7.47701e-07	down
SSC5D	3.70178e-10	1.82561	9.96185e-06	down
SSR1	7.0975e-13	1.63706	1.91001e-08	down
SSRP1	3.2295e-07	2.13167	0.0086909	down
ST14	6.49316e-08	2.23476	0.00174738	down
ST3GAL3	2.11551e-09	1.22334	5.69305e-05	down
ST5	2.14917e-10	2.17573	5.78363e-06	down
ST6GALNAC6	1.0628e-11	1.87719	2.86011e-07	down
STAB2	2.2214e-09	1.85854	5.97801e-05	down
STARD13	1.42443e-06	1.77797	0.0383328	down
STARD7	2.8957e-07	1.77517	0.00779263	down
STAT6	9.73989e-08	1.48581	0.0026211	down
STIMATE	1.53011e-07	1.63069	0.00411767	down
STK25	7.0717e-07	1.90729	0.0190307	down
STK39	2.15232e-09	2.51914	5.7921e-05	down
STPG2	9.24267e-07	1.73014	0.0248729	down
STS	4.29876e-10	1.95915	1.15684e-05	down
STX19	2.2898e-07	1.49308	0.00616208	down
STX1A	2.30891e-07	2.52237	0.00621352	down
STXBP1	2.72095e-08	1.58956	0.000732234	down
SUFU	9.10522e-08	1.58619	0.00245031	down
SUN2	1.26768e-08	1.74286	0.000341145	down
SURF2	6.87944e-09	2.10734	0.000185133	down
SYNGR2	6.64692e-09	2.24056	0.000178875	down
SYNJ2	1.04919e-07	1.58213	0.00282348	down
SYVN1	7.27832e-07	1.15727	0.0195867	down
TACC3	1.69744e-10	2.20212	4.56798e-06	down
TAF4	7.18679e-09	2.16518	0.000193404	down
TAF8	8.89105e-08	2.1498	0.00239267	down
TANC2	2.02559e-10	1.91252	5.45106e-06	down
TASOR2	2.19963e-09	1.78716	5.91942e-05	down
TAT	3.89494e-07	1.81106	0.0104817	down
TAX1BP3	7.99499e-07	2.05091	0.0215153	down
TBC1D1	4.88927e-10	1.90727	1.31575e-05	down
TBC1D14	1.01657e-07	1.67815	0.0027357	down
TBC1D7	2.42368e-08	1.83839	0.000652236	down
TBC1D8	9.53477e-08	1.69931	0.0025659	down
TBCEL	5.42502e-11	2.41803	1.45993e-06	down
TCEA3	2.99919e-09	2.29658	8.07111e-05	down
TCEANC	3.65655e-08	1.60646	0.000984014	down
TCERG1	6.68081e-07	1.49927	0.0179787	down
TCF12	4.90012e-11	2.2769	1.31867e-06	down
TCTN2	1.06874e-06	1.79003	0.0287608	down
TDP2	1.43945e-06	1.87048	0.0387371	down
TEAD4	1.26922e-06	1.9341	0.0341559	down
TERF2	2.74508e-13	2.70956	7.38728e-09	down
TET3	3.02617e-13	1.95377	8.14372e-09	down
TEX2	6.76408e-11	1.79727	1.82028e-06	down
TFAP4	6.27629e-20	3.37732	1.68901e-15	down
TFE3	6.04136e-09	1.78249	0.000162579	down
TFF3	3.41729e-11	3.10412	9.19627e-07	down
TGFBI	3.84386e-08	2.05403	0.00103442	down
TGIF2	9.51664e-07	2.06986	0.0256102	down
THBS4	5.05978e-08	1.53431	0.00136164	down
THOP1	1.15169e-09	2.03082	3.09932e-05	down
THRB	8.13918e-09	1.58876	0.000219033	down
THSD7A	1.8474e-07	1.16457	0.00497154	down
TICAM1	1.11437e-07	2.08777	0.00299889	down
TJAP1	1.32314e-10	2.13466	3.56071e-06	down
TLE2	8.9961e-11	2.58568	2.42094e-06	down
TMCC3	5.21285e-07	1.56003	0.0140283	down
TMEM109	2.52479e-07	1.73255	0.00679446	down
TMEM114	6.23278e-13	2.52999	1.6773e-08	down
TMEM132D	7.95538e-17	2.37975	2.14087e-12	down
TMEM150B	1.62057e-10	2.22541	4.36113e-06	down
TMEM159	1.49467e-08	1.99074	0.000402232	down
TMEM183A	7.26022e-08	2.09721	0.0019538	down
TMEM184B	5.54618e-10	2.3252	1.49253e-05	down
TMEM231	6.7813e-10	1.86535	1.82491e-05	down
TMEM252	1.6156e-07	2.4484	0.00434775	down
TMEM255B	2.21277e-08	1.42908	0.00059548	down
TMEM51	2.20705e-08	1.9077	0.000593939	down
TMEM63B	1.53406e-08	2.00353	0.000412832	down
TMEM69	9.57387e-07	1.87318	0.0257642	down
TMEM8B	5.70557e-11	2.20206	1.53543e-06	down
TMEM94	9.12562e-07	1.39797	0.0245579	down
TNFRSF19	3.42522e-08	2.30363	0.000921762	down
TNFSF12	1.6281e-07	2.30827	0.00438139	down
TNS1	2.56091e-07	1.57918	0.00689167	down
TOM1	2.9757e-11	2.52513	8.00791e-07	down
TOM1L2	3.18191e-07	2.14194	0.00856283	down
TP53I11	1.23963e-06	1.53016	0.0333596	down
TP53INP2	1.7113e-09	2.28206	4.60529e-05	down
TPBGL	6.86963e-07	1.92494	0.0184869	down
TRAF3	5.81917e-10	1.73773	1.566e-05	down
TRAF3IP2	2.32202e-08	2.1381	0.00062488	down
TRAFD1	1.00008e-11	1.9095	2.69131e-07	down
TRAK1	6.53882e-08	1.85208	0.00175966	down
TRAM2	1.01336e-08	1.34772	0.000272706	down
TRAPPC10	1.97227e-16	2.6626	5.30758e-12	down
TRAPPC9	4.91814e-07	1.35569	0.0132352	down
TRERF1	7.06021e-10	1.85375	1.89997e-05	down
TRIM11	5.37055e-08	1.97576	0.00144527	down
TRIM33	5.59072e-10	2.06624	1.50452e-05	down
TRIO	3.2943e-18	2.87498	8.86529e-14	down
TRMT2B	1.35219e-07	1.82705	0.00363889	down
TRPC6	1.90018e-11	1.04643	5.11357e-07	down
TRPM3	4.66836e-07	1.51371	0.012563	down
TRPM5	1.74044e-06	1.25284	0.0468371	down
TRPT1	2.39694e-10	3.48724	6.45041e-06	down
TRPV6	4.44451e-08	2.05034	0.00119606	down
TSGA10IP	1.83754e-17	1.63259	4.94501e-13	down
TSPAN17	2.99424e-08	1.75875	0.000805779	down
TTC23	1.61222e-14	2.4856	4.33865e-10	down
TTC23L	1.54419e-07	1.36044	0.00415558	down
TTLL9	2.03948e-10	2.42788	5.48845e-06	down
TUBB8	1.70456e-08	2.48564	0.000458715	down
TVP23A	1.10152e-08	1.99368	0.000296431	down
TYRO3	1.13807e-07	1.78438	0.00306267	down
U2AF2	1.34796e-07	2.0425	0.00362748	down
UBALD1	9.67047e-09	2.06329	0.000260242	down
UBE2L3	1.64118e-07	1.08993	0.00441658	down
UBR4	3.92887e-10	1.73554	1.0573e-05	down
UCHL1	3.49968e-12	2.66056	9.41799e-08	down
UCHL5	8.48876e-07	1.73097	0.0228441	down
UHRF1	4.18364e-08	1.2651	0.00112586	down
UMAD1	6.99062e-11	2.12109	1.88125e-06	down
UNC13C	3.0095e-08	1.74171	0.000809887	down
UNC45A	1.31451e-07	1.90826	0.00353748	down
UNC5A	4.15507e-12	1.71072	1.11817e-07	down
UNC80	1.46934e-09	1.539	3.95413e-05	down
UNC93A	1.52946e-08	2.05049	0.000411592	down
USP19	9.18325e-07	1.77008	0.024713	down
USP31	2.3478e-11	2.21331	6.31817e-07	down
USP34	4.04457e-11	1.50409	1.08844e-06	down
USP35	1.61784e-09	1.85105	4.35376e-05	down
USP39	1.26591e-07	1.95579	0.00340669	down
USP5	7.17182e-10	2.38381	1.93001e-05	down
VAC14	1.78204e-06	1.76663	0.0479565	down
VPS13B	4.18637e-10	1.6827	1.12659e-05	down
VPS13D	4.6151e-12	1.89962	1.24197e-07	down
VPS18	3.87527e-09	2.15885	0.000104287	down
VPS26C	9.28238e-07	2.0876	0.0249798	down
VPS37C	7.46108e-16	1.78146	2.00785e-11	down
VPS45	1.56845e-09	1.44171	4.22087e-05	down
WAC	1.60237e-06	1.43652	0.0431212	down
WASF3	9.68829e-12	2.45366	2.60722e-07	down
WASHC1	4.07493e-12	2.09378	1.0966e-07	down
WASL	8.20482e-08	1.50567	0.002208	down
WDFY1	1.05896e-06	1.22738	0.0284976	down
WDFY3	4.71084e-09	1.57846	0.000126773	down
WDR26	4.87286e-08	1.8993	0.00131134	down
WDR4	2.3979e-07	1.3109	0.00645299	down
WDR81	5.21606e-08	1.58452	0.0014037	down
WDR91	5.64376e-11	2.21071	1.51879e-06	down
WIPF2	1.52142e-10	1.67721	4.0943e-06	down
WIZ	1.74758e-07	2.07077	0.00470292	down
WLS	1.32715e-15	2.39495	3.5715e-11	down
WNK2	2.80604e-08	1.39964	0.000755135	down
WTAP	4.56939e-07	1.47875	0.0122967	down
WWOX	6.46645e-10	2.12881	1.74019e-05	down
XPNPEP1	1.97074e-08	1.38807	0.000530345	down
XPR1	2.3545e-15	2.04768	6.33621e-11	down
XRCC1	2.90172e-14	2.33455	7.80881e-10	down
YBX2	5.77839e-09	1.88582	0.000155502	down
YLPM1	2.45234e-11	2.10141	6.5995e-07	down
YPEL1	1.22597e-12	2.41808	3.2992e-08	down
YWHAE	1.50282e-10	2.06764	4.04423e-06	down
ZBED4	2.88079e-07	1.5888	0.0077525	down
ZBTB18	1.43584e-06	1.59466	0.0386398	down
ZBTB2	1.76392e-08	2.05974	0.000474688	down
ZBTB22	3.35516e-07	1.71257	0.00902906	down
ZBTB39	1.04089e-06	1.37766	0.0280113	down
ZBTB4	9.7552e-13	1.83423	2.62522e-08	down
ZBTB46	8.98142e-11	1.71727	2.41699e-06	down
ZC3H4	7.48052e-14	2.22523	2.01308e-09	down
ZC4H2	3.57383e-07	2.3413	0.00961753	down
ZCCHC12	4.49976e-12	4.32186	1.21093e-07	down
ZCCHC14	1.17018e-07	1.82162	0.00314908	down
ZDHHC14	2.93035e-10	1.4649	7.88586e-06	down
ZDHHC18	8.08598e-11	2.25665	2.17602e-06	down
ZDHHC5	5.22854e-08	1.44652	0.00140705	down
ZDHHC8	4.85267e-08	2.50403	0.0013059	down
ZHX2	4.85761e-11	2.31298	1.30723e-06	down
ZKSCAN2	6.93297e-08	1.42845	0.00186573	down
ZMAT3	1.15934e-06	2.01677	0.0311989	down
ZMAT4	2.84718e-15	2.15655	7.66204e-11	down
ZMIZ1	4.75633e-09	1.72893	0.000127998	down
ZMIZ2	5.58821e-10	2.28271	1.50384e-05	down
ZMYM3	1.81311e-06	1.65408	0.0487925	down
ZNF169	4.35331e-11	1.38103	1.17152e-06	down
ZNF195	1.04802e-06	1.57113	0.0282032	down
ZNF236	2.24147e-07	1.69311	0.00603201	down
ZNF283	1.47171e-08	2.11634	0.000396052	down
ZNF318	2.17811e-11	2.07554	5.86151e-07	down
ZNF385A	1.85296e-06	2.11405	0.0498651	down
ZNF415	1.38067e-08	2.24046	0.000371552	down
ZNF526	2.43882e-07	1.81734	0.0065631	down
ZNF598	3.94471e-07	1.65496	0.0106156	down
ZNF628	6.81441e-08	2.00782	0.00183382	down
ZNF692	9.06942e-10	1.6761	2.44067e-05	down
ZNF709	2.65955e-08	1.64319	0.000715711	down
ZNF770	6.84317e-09	1.52575	0.000184157	down
ZNF804B	5.11486e-08	1.85581	0.00137646	down
ZNF865	2.02028e-11	1.78306	5.43677e-07	down
ZP2	2.20536e-07	1.12546	0.00593484	down
ZSCAN30	3.0598e-10	1.46444	8.23422e-06	down
ZSCAN5A	3.66646e-10	2.34228	9.86682e-06	down
ZSWIM4	2.03256e-07	1.73231	0.00546982	down
ZSWIM5	7.12651e-07	1.39023	0.0191781	down
ZSWIM8	4.34061e-12	2.53571	1.1681e-07	down
AAMDC	8.98779e-16	-4.02946	2.4187e-11	up
AATF	4.20542e-07	-1.31319	0.0113172	up
ACAT1	2.69286e-10	-1.48237	7.24674e-06	up
ACAT2	2.49736e-07	-2.47443	0.00672064	up
ACOT9	7.85522e-08	-2.4898	0.00211392	up
ACTR6	2.69264e-10	-3.25486	7.24616e-06	up
ADH5	1.83273e-12	-3.23222	4.93205e-08	up
ADORA2B	9.65164e-12	-3.06591	2.59735e-07	up
AIFM1	1.37265e-06	-1.43482	0.0369394	up
AK6	6.58981e-07	-1.59675	0.0177338	up
AKTIP	5.73712e-07	-1.76793	0.0154392	up
ANGPTL4	8.75591e-10	-1.4041	2.3563e-05	up
ANKRD37	9.21456e-14	-3.30976	2.47973e-09	up
ARGFX	3.33963e-09	-3.46259	8.98728e-05	up
ARID4B	1.21956e-09	-1.68341	3.28197e-05	up
ARL13B	7.11765e-09	-1.97627	0.000191543	up
ARPC1A	2.53225e-08	-1.48166	0.000681454	up
ARPC2	3.14278e-13	-3.63729	8.45752e-09	up
ARPC3	2.26323e-08	-2.98688	0.000609057	up
ATG101	3.96535e-08	-2.25148	0.00106712	up
ATP5F1E	1.16367e-11	-2.99859	3.13155e-07	up
ATP5MG	3.56615e-13	-3.76891	9.59686e-09	up
ATP5MPL	4.19481e-08	-3.47314	0.00112886	up
ATP5PF	2.13134e-12	-3.36093	5.73565e-08	up
ATP6V0E1	8.8083e-14	-3.26599	2.3704e-09	up
ATP6V1G1	9.55125e-11	-2.46745	2.57034e-06	up
ATP8B4	4.41285e-16	-1.27567	1.18754e-11	up
BAG1	3.63274e-07	-1.75018	0.00977607	up
BCAS2	8.33373e-08	-1.90555	0.00224269	up
BCS1L	1.72813e-08	-2.21205	0.000465057	up
BIRC5	3.89095e-13	-3.39679	1.04709e-08	up
BLOC1S5	3.77866e-10	-2.16689	1.01687e-05	up
BMP4	2.01136e-14	-1.87651	5.41277e-10	up
BOD1	9.26992e-08	-3.12833	0.00249463	up
BRIX1	1.34476e-09	-2.68861	3.61887e-05	up
BTF3	4.0893e-07	-1.50924	0.0110047	up
BTG1	4.52302e-10	-1.31314	1.21719e-05	up
BUB1B	7.70141e-07	-1.0457	0.0207253	up
BUD31	5.52551e-13	-3.30767	1.48697e-08	up
C11H12orf75	8.80645e-08	-1.84598	0.0023699	up
C11H12orf76	2.24244e-09	-1.04853	6.03464e-05	up
C14H11orf98	3.1805e-07	-2.24489	0.00855903	up
C15H9orf153	5.95422e-07	-1.90467	0.0160234	up
C15H9orf85	6.62967e-12	-2.51221	1.78411e-07	up
C16H17orf58	7.90463e-14	-2.36742	2.12722e-09	up
C18H18orf21	1.3499e-11	-1.95944	3.63272e-07	up
C18H18orf25	1.04256e-08	-1.23335	0.000280564	up
C18H18orf32	4.84588e-11	-3.39783	1.30408e-06	up
C1H1orf35	2.63883e-08	-1.9149	0.000710135	up
C1QBP	6.09755e-15	-3.52283	1.64091e-10	up
C20H16orf87	5.9836e-12	-2.74006	1.61025e-07	up
C4H6orf226	1.26412e-10	-1.41424	3.40187e-06	up
C7H14orf178	1.01716e-10	-1.35807	2.73728e-06	up
C8H8orf76	6.29234e-09	-1.92585	0.000169333	up
CACYBP	5.22205e-11	-2.61226	1.40531e-06	up
CALM1	4.82758e-08	-1.81156	0.00129915	up
CALM2	6.20985e-07	-2.44558	0.0167113	up
CASP8AP2	9.91687e-08	-1.0719	0.00266873	up
CBR4	2.65742e-07	-2.49749	0.00715139	up
CBY1	7.04065e-08	-2.15478	0.00189471	up
CCDC110	1.34289e-06	-1.18525	0.0361385	up
CCDC121	2.18773e-07	-1.10989	0.0058874	up
CCDC28A	1.94396e-10	-1.36125	5.23139e-06	up
CCDC32	4.38839e-07	-3.25038	0.0118096	up
CCDC59	2.89985e-10	-2.25978	7.80379e-06	up
CCDC61	6.46001e-15	-1.57835	1.73845e-10	up
CCDC83	1.57234e-14	-1.57712	4.23133e-10	up
CCDC84	3.9388e-07	-1.73167	0.0105997	up
CCNB1	2.14155e-11	-2.70753	5.76312e-07	up
CCNDBP1	1.92429e-08	-1.46778	0.000517847	up
CCNG2	2.30452e-07	-2.79988	0.0062017	up
CD58	1.28548e-07	-2.47397	0.00345936	up
CD63	1.48343e-07	-2.39142	0.00399207	up
CDC26	5.27038e-10	-2.61606	1.41831e-05	up
CDK4	1.06987e-09	-2.54118	2.87912e-05	up
CDK5RAP3	1.08412e-09	-1.38901	2.91747e-05	up
CDV3	5.8047e-14	-4.56529	1.5621e-09	up
CENPK	2.16393e-14	-2.64562	5.82336e-10	up
CENPW	2.09785e-13	-4.18295	5.64552e-09	up
CEP70	1.93287e-11	-2.69471	5.20155e-07	up
CERS5	1.80593e-08	-2.49316	0.000485994	up
CFAP206	1.23157e-08	-1.956	0.000331428	up
CFAP97	2.30299e-07	-1.59111	0.00619759	up
CGAS	5.41924e-10	-1.80507	1.45837e-05	up
CHCHD2	5.3462e-20	-5.59356	1.43871e-15	up
CHCHD7	4.19467e-11	-3.00688	1.12883e-06	up
CHIC2	1.32236e-14	-2.29454	3.55861e-10	up
CHMP5	2.81131e-09	-2.48554	7.56552e-05	up
CHRNB1	5.57762e-08	-2.94334	0.00150099	up
CHURC1	1.42105e-07	-2.25866	0.00382417	up
CIAO2B	5.1789e-08	-2.82647	0.00139369	up
CIB1	9.86899e-08	-1.8203	0.00265584	up
CISD1	2.92451e-07	-1.67658	0.00787014	up
CKS1B	3.87276e-14	-3.11074	1.0422e-09	up
CKS2	1.55102e-21	-4.97616	4.17394e-17	up
CLK1	1.16375e-06	-2.20116	0.0313177	up
CMBL	7.5204e-12	-2.25613	2.02381e-07	up
CMC1	1.67484e-07	-2.37325	0.00450716	up
CMPK1	1.20385e-07	-1.31613	0.00323967	up
CNIH4	2.46629e-13	-3.09647	6.63704e-09	up
COA1	6.72406e-08	-2.19593	0.00180951	up
COMMD6	1.56902e-07	-3.19639	0.0042224	up
COPS3	3.90622e-11	-2.53924	1.0512e-06	up
COPS6	4.17482e-14	-2.7775	1.12349e-09	up
COX6C	1.21022e-10	-3.15918	3.25683e-06	up
COX7A2L	3.67584e-15	-3.30284	9.89204e-11	up
COX8A	4.49444e-08	-2.83043	0.0012095	up
CRLF3	4.07028e-09	-3.17255	0.000109535	up
CSKMT	9.55854e-09	-1.78405	0.00025723	up
CTNNA1	2.95052e-07	-1.50071	0.00794015	up
CWC15	4.04645e-11	-3.3849	1.08894e-06	up
CYB5A	3.65419e-07	-2.53775	0.0098338	up
CYCS	1.48731e-06	-2.17928	0.0400251	up
CYSTM1	5.72866e-07	-2.71492	0.0154164	up
DBI	1.16929e-09	-4.30666	3.14667e-05	up
DCAF13	2.17939e-22	-4.45249	5.86495e-18	up
DCDC2	5.04116e-08	-2.74827	0.00135663	up
DDIT3	1.61173e-06	-2.52137	0.0433732	up
DDX10	1.24942e-12	-2.51446	3.3623e-08	up
DDX50	2.50104e-15	-2.71155	6.73055e-11	up
DNAJA1	9.1824e-17	-3.95467	2.47108e-12	up
DNAJC19	3.56573e-09	-3.08079	9.59573e-05	up
DNAJC3	2.29997e-07	-1.02456	0.00618945	up
DNAJC30	1.42676e-07	-3.02408	0.00383955	up
DOHH	6.46491e-07	-1.09566	0.0173977	up
DPH3	6.72442e-10	-2.64113	1.80961e-05	up
DPPA5	4.07861e-11	-3.67107	1.0976e-06	up
DRAM2	1.42219e-07	-1.37288	0.00382725	up
DSC2	1.19599e-08	-1.03661	0.000321853	up
DSTN	1.19498e-11	-2.70015	3.21582e-07	up
DTD1	1.47245e-11	-3.03222	3.9625e-07	up
DUSP5	1.14967e-08	-2.22036	0.000309388	up
DYNLT1	8.68528e-13	-4.56457	2.3373e-08	up
EBNA1BP2	1.53037e-09	-2.73845	4.11838e-05	up
EBP	3.63474e-12	-4.11512	9.78146e-08	up
EDRF1	1.96336e-08	-1.93448	0.000528361	up
EED	2.00657e-10	-1.31151	5.39989e-06	up
EEF1AKMT2	3.22114e-13	-3.43034	8.66841e-09	up
EEF1B2	1.11875e-18	-4.86688	3.01068e-14	up
EEF1E1	1.93295e-08	-2.45723	0.000520176	up
EIF1	1.93025e-17	-2.93007	5.1945e-13	up
EIF1AX	5.32311e-10	-2.87498	1.4325e-05	up
EIF1B	1.11745e-15	-4.19264	3.00717e-11	up
EIF2S2	8.96371e-08	-1.93486	0.00241222	up
EIF3A	1.70645e-07	-1.44502	0.00459222	up
EIF4A3	2.76738e-08	-2.40942	0.00074473	up
EIF5	1.14334e-12	-2.76585	3.07685e-08	up
EIF5A2	3.97085e-07	-2.59746	0.010686	up
EIF5B	1.24732e-08	-1.88927	0.000335666	up
ELOC	3.87797e-09	-2.59194	0.00010436	up
EMC6	4.73555e-08	-3.37402	0.00127438	up
EMC7	1.86945e-11	-1.46842	5.03087e-07	up
EMC8	6.92495e-09	-2.46664	0.000186357	up
EMG1	1.58572e-14	-2.30604	4.26734e-10	up
ENOPH1	1.88681e-07	-1.28784	0.00507761	up
ENY2	2.55525e-08	-2.15157	0.000687643	up
EPCAM	4.11044e-08	-1.43812	0.00110616	up
ETFA	3.02813e-10	-2.84242	8.149e-06	up
EXOC1	1.01811e-06	-1.34459	0.0273982	up
EXOSC3	1.57596e-08	-2.06329	0.000424106	up
EXOSC7	7.34367e-11	-3.03121	1.97625e-06	up
FABP5	1.49547e-08	-3.00639	0.000402446	up
FAM136A	2.8288e-09	-3.14502	7.61258e-05	up
FAM199X	2.00036e-08	-1.32718	0.000538316	up
FAM204A	1.08999e-11	-2.85372	2.93327e-07	up
FAM32A	4.27825e-09	-2.60064	0.000115132	up
FAM49B	3.28042e-07	-1.81859	0.00882793	up
FAR1	1.63254e-07	-1.02341	0.00439333	up
FASTKD2	2.53441e-07	-1.80699	0.00682035	up
FAU	1.33375e-18	-5.20545	3.58925e-14	up
FBXO15	7.55659e-10	-1.60552	2.03355e-05	up
FBXW7	1.94644e-08	-1.57985	0.000523807	up
FGFR1OP2	1.54802e-11	-2.29919	4.16587e-07	up
FKBP2	3.77998e-19	-3.8206	1.01723e-14	up
FKBP3	4.78279e-11	-1.26994	1.2871e-06	up
FMC1	4.87551e-08	-1.88694	0.00131205	up
FMR1NB	2.32919e-07	-1.24448	0.00626808	up
FRAT2	2.15597e-15	-3.50077	5.80193e-11	up
FRG1	2.12519e-10	-2.74893	5.7191e-06	up
FTL	7.85263e-12	-2.52815	2.11322e-07	up
FXR1	1.5766e-10	-1.77898	4.24279e-06	up
GABARAPL2	4.67969e-10	-3.56504	1.25935e-05	up
GABPA	1.36021e-08	-2.67727	0.000366046	up
GABRB3	3.63461e-07	-1.00954	0.00978109	up
GALK2	2.6808e-11	-1.10378	7.21431e-07	up
GCC2	7.16661e-08	-2.18133	0.00192861	up
GCDH	6.06586e-07	-1.29625	0.0163238	up
GINS2	2.55021e-13	-4.42637	6.86286e-09	up
GIP	3.76482e-07	-1.94882	0.0101315	up
GLRX3	1.27804e-06	-2.12334	0.0343933	up
GMNN	2.77903e-11	-3.41216	7.47865e-07	up
GPATCH3	1.0045e-08	-2.48161	0.00027032	up
GPBP1	6.98851e-07	-1.33322	0.0188068	up
GPN3	9.73999e-08	-2.17737	0.00262113	up
GSC	4.6451e-08	-2.11079	0.00125004	up
GSKIP	1.55409e-08	-3.05644	0.000418222	up
GTF2A2	8.54079e-17	-3.87324	2.29841e-12	up
GTF2F2	2.4763e-07	-1.86649	0.00666396	up
GTF2H5	3.32406e-12	-3.50903	8.94538e-08	up
GTPBP4	8.29403e-09	-1.4256	0.000223201	up
H2AFJ	2.05107e-07	-2.03763	0.00551964	up
H2AFZ	7.95028e-13	-3.25192	2.1395e-08	up
HAS2	8.49852e-11	-3.12101	2.28704e-06	up
HAUS3	7.01798e-10	-1.249	1.88861e-05	up
HBA1	4.98481e-08	-2.96081	0.00134146	up
HDAC1	5.12826e-16	-2.51206	1.38007e-11	up
HDDC2	5.14953e-08	-1.21184	0.00138579	up
HDHD5	2.97365e-09	-1.08855	8.00239e-05	up
HERC5	1.35797e-06	-1.32776	0.0365443	up
HHEX	5.98229e-07	-1.10829	0.0160989	up
HINT1	9.62819e-21	-5.01347	2.59104e-16	up
HMGB2	1.75179e-17	-3.27297	4.71425e-13	up
HMGB3	1.88334e-07	-1.68507	0.00506826	up
HNRNPH3	2.12564e-09	-2.33276	5.72031e-05	up
HPRT1	8.53516e-07	-2.2266	0.022969	up
HSD17B10	1.00267e-07	-2.00114	0.00269829	up
HSPA4	4.90144e-08	-1.54093	0.00131903	up
HSPB11	7.37635e-16	-2.55937	1.98505e-11	up
HTATSF1	1.26189e-07	-2.17677	0.00339587	up
HYPK	1.48409e-14	-4.36737	3.99384e-10	up
ID4	1.67484e-07	-3.19794	0.00450716	up
IER3IP1	4.13778e-12	-2.91628	1.11352e-07	up
IFRD1	9.74745e-07	-2.0173	0.0262314	up
IFT20	1.37643e-09	-1.36858	3.70411e-05	up
IFT52	9.79812e-07	-1.56776	0.0263677	up
IL23A	7.25779e-08	-2.63016	0.00195315	up
ING3	3.5432e-15	-3.20463	9.53512e-11	up
INO80C	1.43379e-06	-1.25666	0.0385847	up
INSIG2	3.21337e-13	-1.61113	8.6475e-09	up
ITGB1BP1	1.41673e-11	-2.45076	3.81255e-07	up
JTB	5.32848e-11	-1.25886	1.43395e-06	up
KHDC1	1.32987e-11	-2.89954	3.57881e-07	up
KHDC1L	6.57205e-13	-2.96396	1.7686e-08	up
KHDC3L	4.60623e-09	-2.83321	0.000123958	up
KRR1	1.79221e-13	-4.02527	4.82301e-09	up
KRT18	3.8112e-08	-2.38441	0.00102563	up
KRT222	1.04065e-08	-3.40467	0.00028005	up
KTI12	4.28435e-11	-1.50385	1.15296e-06	up
LAMTOR5	7.06337e-07	-1.1913	0.0190082	up
LCN6	4.18476e-08	-1.99882	0.00112616	up
LDHA	4.12937e-13	-3.16018	1.11125e-08	up
LEO1	4.24002e-07	-2.20996	0.0114103	up
LEUTX	2.12383e-08	-2.65517	0.000571543	up
LOC100423294	8.64413e-08	-1.63013	0.00232622	up
LOC100424971	2.08559e-14	-1.99967	5.61254e-10	up
LOC100426255	1.10347e-08	-1.01794	0.000296954	up
LOC100427851	2.27016e-15	-2.88339	6.10923e-11	up
LOC100429705	3.80513e-07	-1.03539	0.01024	up
LOC106992281	2.90932e-13	-3.16139	7.82927e-09	up
LOC106992283	2.69874e-12	-2.74035	7.26259e-08	up
LOC106992311	6.0258e-09	-1.5455	0.00016216	up
LOC106992887	1.02848e-10	-3.01456	2.76775e-06	up
LOC106993339	1.03775e-09	-2.29528	2.7927e-05	up
LOC106993384	2.34985e-08	-1.37904	0.000632368	up
LOC106993579	8.77517e-11	-2.09324	2.36149e-06	up
LOC106993965	9.25751e-11	-4.45101	2.49129e-06	up
LOC106994282	1.73943e-11	-1.71977	4.68099e-07	up
LOC106994438	9.28989e-08	-1.66962	0.0025	up
LOC106994471	1.28765e-07	-3.09801	0.00346518	up
LOC106994547	2.94185e-07	-2.06258	0.00791681	up
LOC106994555	9.99607e-10	-1.4888	2.69004e-05	up
LOC106994756	3.31096e-14	-3.39433	8.91012e-10	up
LOC106994870	1.87759e-10	-3.82947	5.05277e-06	up
LOC106994953	5.09694e-08	-2.53553	0.00137164	up
LOC106994973	3.95287e-09	-3.13955	0.000106376	up
LOC106995399	5.15902e-11	-2.05929	1.38834e-06	up
LOC106995630	2.03778e-09	-3.331	5.48387e-05	up
LOC106995726	1.42852e-10	-1.70598	3.8443e-06	up
LOC106995906	7.23759e-16	-1.38746	1.94771e-11	up
LOC106995957	2.76932e-10	-2.07951	7.45251e-06	up
LOC106995978	1.35085e-10	-2.50628	3.63527e-06	up
LOC106996000	3.12812e-10	-2.42619	8.41809e-06	up
LOC106996680	7.9162e-15	-4.06659	2.13033e-10	up
LOC106996966	1.5224e-06	-1.66529	0.0409693	up
LOC106997895	1.33015e-08	-2.92256	0.000357958	up
LOC106998255	2.97743e-09	-2.09385	8.01256e-05	up
LOC106998568	2.88115e-17	-2.15695	7.75345e-13	up
LOC106998738	4.26729e-08	-2.84692	0.00114837	up
LOC106998836	8.98408e-10	-2.84485	2.41771e-05	up
LOC106999852	1.00917e-12	-1.02075	2.71578e-08	up
LOC107000027	4.06401e-07	-1.12188	0.0109367	up
LOC107000378	3.94575e-11	-2.46685	1.06184e-06	up
LOC107000401	1.87004e-10	-2.66929	5.03247e-06	up
LOC107000809	1.16941e-08	-1.41943	0.0003147	up
LOC107000909	9.96002e-10	-2.03504	2.68034e-05	up
LOC107000925	6.86252e-11	-2.77622	1.84677e-06	up
LOC107000998	9.73972e-13	-2.5999	2.62106e-08	up
LOC114669724	1.42881e-06	-1.96652	0.0384507	up
LOC114669847	2.64621e-17	-3.87053	7.12122e-13	up
LOC114669869	5.10334e-07	-1.59663	0.0137336	up
LOC114670676	1.9343e-08	-6.9557	0.000520538	up
LOC114670792	4.00293e-11	-1.07046	1.07723e-06	up
LOC114670905	2.353e-14	-2.2288	6.33216e-10	up
LOC114670950	2.26075e-15	-1.78938	6.08391e-11	up
LOC114671090	2.06716e-08	-1.39572	0.000556295	up
LOC114671097	4.42231e-23	-5.01337	1.19009e-18	up
LOC114672186	6.71158e-12	-1.94792	1.80615e-07	up
LOC114672245	1.52412e-06	-1.01071	0.0410157	up
LOC114672304	3.59181e-16	-1.02588	9.66593e-12	up
LOC114672333	3.19473e-10	-2.48811	8.59733e-06	up
LOC114672632	7.98369e-08	-2.1448	0.00214849	up
LOC114673090	6.21916e-07	-1.59689	0.0167364	up
LOC114673210	5.5764e-13	-4.54768	1.50067e-08	up
LOC114673344	7.31394e-16	-3.25461	1.96825e-11	up
LOC114673461	1.26168e-20	-4.26685	3.39531e-16	up
LOC114673829	2.70488e-11	-1.85385	7.2791e-07	up
LOC114674112	1.13733e-07	-5.49826	0.00306067	up
LOC114674132	1.63937e-16	-1.04591	4.41171e-12	up
LOC114674161	6.89789e-08	-4.12511	0.00185629	up
LOC114674199	1.20871e-10	-2.15738	3.25275e-06	up
LOC114674200	1.36366e-14	-1.79597	3.66975e-10	up
LOC114674206	1.78138e-12	-3.60917	4.79386e-08	up
LOC114674437	1.30704e-11	-4.15385	3.51737e-07	up
LOC114674748	1.31475e-10	-3.08323	3.53814e-06	up
LOC114674848	6.0972e-09	-2.45453	0.000164082	up
LOC114675109	2.7907e-07	-1.38709	0.00751004	up
LOC114675318	1.92867e-09	-1.55083	5.19024e-05	up
LOC114675525	4.37985e-09	-2.26885	0.000117866	up
LOC114675890	2.82652e-10	-2.82771	7.60646e-06	up
LOC114676020	2.82655e-08	-2.59748	0.000760652	up
LOC114676217	1.56736e-09	-1.87494	4.21792e-05	up
LOC114676998	4.06131e-18	-3.50613	1.09294e-13	up
LOC114677040	2.28016e-07	-2.39579	0.00613613	up
LOC114677385	6.20767e-08	-1.80347	0.00167055	up
LOC114677478	3.44023e-07	-1.6936	0.009258	up
LOC114677626	2.97607e-14	-2.37268	8.0089e-10	up
LOC114677662	4.21495e-09	-1.48291	0.000113428	up
LOC114677681	1.03547e-11	-2.05384	2.78654e-07	up
LOC114678359	7.01187e-07	-1.52206	0.0188697	up
LOC114678374	4.48329e-18	-3.86839	1.2065e-13	up
LOC114678397	3.51802e-16	-2.37994	9.46734e-12	up
LOC114678654	2.91911e-07	-3.97904	0.00785563	up
LOC114678780	1.22022e-07	-1.30058	0.00328374	up
LOC114679023	3.85567e-10	-1.03384	1.0376e-05	up
LOC114679275	9.52702e-15	-3.78967	2.56382e-10	up
LOC114680233	1.80835e-08	-2.08281	0.000486646	up
LOC114680234	6.50325e-21	-3.34489	1.75009e-16	up
LOC114680244	5.69731e-15	-1.17223	1.5332e-10	up
LOC114680387	7.53235e-08	-2.34398	0.00202703	up
LOC619515	5.30385e-10	-1.6111	1.42732e-05	up
LOC693573	6.71871e-12	-2.45664	1.80807e-07	up
LOC693611	6.17575e-11	-2.61022	1.66196e-06	up
LOC693887	3.16501e-11	-1.44434	8.51736e-07	up
LOC693947	3.33836e-10	-2.16368	8.98385e-06	up
LOC694372	1.04601e-21	-1.21691	2.81492e-17	up
LOC694388	3.57037e-07	-2.10772	0.00960822	up
LOC694887	8.11709e-09	-2.65612	0.000218439	up
LOC694967	2.56398e-09	-1.55769	6.89994e-05	up
LOC695218	4.40126e-09	-1.16942	0.000118442	up
LOC695715	3.01555e-14	-2.69342	8.11515e-10	up
LOC696134	6.07121e-09	-1.89812	0.000163382	up
LOC696192	3.78209e-13	-2.26221	1.0178e-08	up
LOC696219	1.93675e-14	-3.1838	5.21198e-10	up
LOC696321	1.86066e-08	-2.76975	0.000500722	up
LOC696610	9.20297e-10	-4.37931	2.47661e-05	up
LOC696801	1.76975e-10	-3.27504	4.76259e-06	up
LOC696956	2.08534e-08	-2.39356	0.000561186	up
LOC696959	2.45175e-10	-1.85062	6.59791e-06	up
LOC697790	8.27275e-14	-2.92067	2.22628e-09	up
LOC697805	2.11008e-12	-1.42932	5.67844e-08	up
LOC698056	1.07069e-19	-3.44629	2.88133e-15	up
LOC698075	2.21152e-08	-1.29793	0.000595142	up
LOC698130	4.1991e-09	-2.94648	0.000113002	up
LOC698256	2.72942e-08	-1.27618	0.000734515	up
LOC698281	1.25281e-09	-1.17903	3.37145e-05	up
LOC698403	2.76914e-10	-1.62014	7.45203e-06	up
LOC698942	7.25048e-16	-4.41059	1.95118e-11	up
LOC699443	1.43999e-14	-3.41913	3.87515e-10	up
LOC699756	3.40319e-16	-1.82803	9.15833e-12	up
LOC699779	1.19344e-09	-2.58344	3.21166e-05	up
LOC700257	2.13205e-13	-2.1054	5.73755e-09	up
LOC700425	1.51728e-13	-2.54101	4.08315e-09	up
LOC701053	4.13246e-15	-3.58569	1.11209e-10	up
LOC701250	2.97584e-17	-3.09376	8.00829e-13	up
LOC701437	3.45677e-11	-2.6675	9.30251e-07	up
LOC701473	8.38663e-08	-1.85511	0.00225693	up
LOC701497	1.18999e-06	-1.67077	0.0320238	up
LOC701818	9.40447e-07	-1.14458	0.0253084	up
LOC702297	1.06889e-13	-2.02337	2.8765e-09	up
LOC702389	8.05849e-11	-1.54189	2.16862e-06	up
LOC702514	2.66231e-07	-1.02928	0.00716454	up
LOC702847	2.44304e-09	-2.22713	6.57448e-05	up
LOC702859	8.81684e-11	-2.101	2.3727e-06	up
LOC702864	2.71738e-09	-2.24111	7.31275e-05	up
LOC703365	3.17771e-13	-3.78166	8.55153e-09	up
LOC703832	9.65437e-09	-1.01539	0.000259809	up
LOC703853	1.02023e-11	-1.42129	2.74555e-07	up
LOC703880	9.16058e-07	-1.09224	0.024652	up
LOC704026	9.93669e-08	-3.79071	0.00267406	up
LOC704104	1.48411e-20	-4.26753	3.99389e-16	up
LOC704238	1.96457e-16	-1.49267	5.28684e-12	up
LOC704640	5.59206e-14	-1.61187	1.50488e-09	up
LOC704854	1.92369e-11	-1.25855	5.17685e-07	up
LOC705327	1.39652e-12	-2.21069	3.75817e-08	up
LOC705636	9.33943e-08	-1.75961	0.00251333	up
LOC706087	7.00757e-13	-3.35389	1.88581e-08	up
LOC706606	2.61573e-15	-2.79835	7.03919e-11	up
LOC706774	2.2999e-14	-3.20312	6.18926e-10	up
LOC706956	2.45631e-07	-2.99221	0.00661018	up
LOC707085	2.12042e-16	-3.17093	5.70625e-12	up
LOC707320	2.97403e-13	-1.39627	8.0034e-09	up
LOC707602	2.56799e-07	-2.46678	0.00691071	up
LOC707684	3.86394e-07	-1.28695	0.0103982	up
LOC707869	1.3177e-06	-1.72193	0.0354605	up
LOC708405	4.30356e-11	-2.73306	1.15813e-06	up
LOC708492	1.72786e-12	-2.51997	4.64985e-08	up
LOC708725	4.78198e-17	-1.35684	1.28688e-12	up
LOC708899	4.97099e-10	-2.0186	1.33774e-05	up
LOC709314	7.36043e-11	-2.2231	1.98076e-06	up
LOC709523	2.3106e-07	-1.4513	0.00621807	up
LOC709952	1.40899e-11	-1.46046	3.79174e-07	up
LOC710317	1.24441e-08	-1.22215	0.000334884	up
LOC711174	1.83355e-08	-2.55333	0.000493426	up
LOC711626	7.97686e-11	-3.39699	2.14665e-06	up
LOC711760	8.01737e-11	-1.50175	2.15756e-06	up
LOC711872	1.89615e-19	-2.01748	5.10273e-15	up
LOC712661	3.10082e-10	-3.23773	8.34461e-06	up
LOC712987	8.73731e-08	-2.19117	0.0023513	up
LOC713024	3.98776e-12	-2.62314	1.07315e-07	up
LOC713295	5.21899e-07	-1.2802	0.0140448	up
LOC715154	3.68561e-11	-1.90338	9.91834e-07	up
LOC715948	5.62675e-12	-1.54705	1.51421e-07	up
LOC716530	5.50672e-09	-1.28396	0.000148191	up
LOC717214	5.06049e-16	-4.61133	1.36183e-11	up
LOC717289	8.8936e-18	-3.19038	2.39336e-13	up
LOC717801	2.21096e-10	-1.4292	5.94991e-06	up
LOC717831	1.37065e-06	-1.69686	0.0368856	up
LOC717879	1.00031e-08	-3.10891	0.000269193	up
LOC718280	1.88555e-10	-2.98709	5.07422e-06	up
LOC718407	4.45479e-14	-2.38792	1.19883e-09	up
LOC718737	5.92919e-18	-2.66075	1.5956e-13	up
LOC718777	2.11107e-13	-2.50128	5.68109e-09	up
LOC719571	1.26731e-07	-2.38706	0.00341045	up
LOC719947	1.57058e-14	-2.42511	4.22658e-10	up
LOC719990	7.2121e-12	-2.7968	1.94085e-07	up
LOC720236	2.01985e-08	-2.221	0.000543562	up
LOC720717	6.696e-11	-4.35796	1.80196e-06	up
LOC721751	2.61858e-15	-1.84014	7.04686e-11	up
LOC722804	1.25013e-10	-2.16173	3.36421e-06	up
LOC722847	1.603e-07	-1.32063	0.00431384	up
LOC722929	4.62086e-08	-2.02964	0.00124352	up
LOC722977	7.60945e-09	-1.04918	0.000204778	up
LRRFIP2	2.10119e-07	-2.04133	0.00565452	up
LSM1	3.35797e-08	-2.27841	0.000903663	up
LSM14A	1.06697e-06	-1.76495	0.0287133	up
LSM3	1.20861e-18	-4.38936	3.2525e-14	up
LSM4	6.51959e-07	-1.46976	0.0175449	up
LSM6	1.17042e-17	-3.99635	3.14972e-13	up
LTV1	6.76525e-13	-3.18375	1.8206e-08	up
MAD2L1	1.92909e-07	-2.66171	0.00519137	up
MAGOH	3.97735e-21	-5.32484	1.07034e-16	up
MALSU1	1.09653e-09	-3.6349	2.95087e-05	up
MAP1LC3B	1.15081e-09	-2.34622	3.09696e-05	up
MAP3K7CL	6.9131e-08	-2.62071	0.00186038	up
2025-03-07	1.42757e-06	-1.95543	0.0384173	up
MARCKS	5.11336e-10	-1.1129	1.37606e-05	up
MDH1	3.09917e-09	-2.66913	8.34019e-05	up
MED21	1.73174e-06	-1.97164	0.0466028	up
MED31	7.4465e-09	-2.84862	0.000200393	up
MED4	6.46698e-13	-3.23549	1.74033e-08	up
METTL21A	1.28492e-06	-1.47094	0.0345784	up
MGST3	5.54628e-14	-3.65307	1.49256e-09	up
MICOS10	8.19164e-10	-1.96778	2.20445e-05	up
MIF	2.40147e-13	-3.0767	6.4626e-09	up
MITD1	4.01843e-12	-1.70535	1.0814e-07	up
MLF1	9.93808e-07	-2.09661	0.0267444	up
MND1	4.22124e-13	-2.12272	1.13598e-08	up
MNS1	1.59511e-16	-3.40427	4.29259e-12	up
MOAP1	1.09495e-06	-1.26671	0.0294661	up
MORN2	2.55092e-09	-3.93461	6.86478e-05	up
MPC2	2.14397e-14	-2.95131	5.76963e-10	up
MPG	8.45846e-08	-3.15605	0.00227626	up
MRE11	5.03712e-10	-1.91989	1.35554e-05	up
MRFAP1	3.40735e-07	-2.39407	0.00916952	up
MRPL12	1.13677e-12	-1.73734	3.05916e-08	up
MRPL14	3.30576e-09	-3.41776	8.89612e-05	up
MRPL20	2.37961e-07	-2.3394	0.00640377	up
MRPL22	3.22888e-11	-3.04894	8.68923e-07	up
MRPL32	3.90831e-10	-3.10183	1.05177e-05	up
MRPL33	1.73171e-06	-1.84126	0.0466021	up
MRPL40	3.0069e-17	-3.64737	8.09188e-13	up
MRPL41	3.1194e-19	-5.46885	8.39461e-15	up
MRPL42	7.34036e-15	-2.71173	1.97536e-10	up
MRPL43	9.07906e-10	-1.83628	2.44327e-05	up
MRPL46	3.24562e-09	-2.37385	8.73428e-05	up
MRPL47	6.68068e-10	-1.86347	1.79784e-05	up
MRPL51	2.76692e-09	-2.91991	7.44607e-05	up
MRPL52	6.55951e-10	-3.47542	1.76523e-05	up
MRPL57	2.71946e-16	-3.58262	7.31833e-12	up
MRPS12	5.17373e-07	-2.83036	0.013923	up
MRPS17	5.09568e-07	-1.3001	0.013713	up
MRPS18C	2.18791e-14	-3.63702	5.88787e-10	up
MRPS23	2.086e-08	-3.27309	0.000561363	up
MRPS26	9.13773e-10	-3.58046	2.45905e-05	up
MRPS31	1.51617e-07	-2.42346	0.00408016	up
MRPS36	8.10806e-14	-2.72837	2.18196e-09	up
MRPS7	1.76166e-07	-1.9983	0.00474079	up
MRPS9	3.92509e-10	-2.40312	1.05628e-05	up
MTDH	1.50551e-08	-1.32033	0.000405147	up
MYCN	2.17974e-08	-1.1323	0.00058659	up
MYDGF	3.33598e-11	-1.77961	8.97745e-07	up
MYL12A	6.06897e-10	-2.02701	1.63322e-05	up
MYL12B	4.26683e-08	-3.11059	0.00114825	up
NAA15	2.98999e-07	-1.23597	0.00804635	up
NAA20	1.77479e-08	-2.48391	0.000477614	up
NACA	1.45626e-17	-3.1435	3.91894e-13	up
NAMPT	4.61375e-10	-1.69363	1.24161e-05	up
NANOGNB	6.82459e-07	-1.37532	0.0183656	up
NASP	3.55517e-07	-2.09562	0.00956731	up
NCBP2AS2	9.65034e-10	-4.05298	2.597e-05	up
NDC80	2.45557e-08	-2.15859	0.000660819	up
NDUFA1	5.8332e-09	-3.76064	0.000156977	up
NDUFA10	6.25877e-16	-3.23134	1.6843e-11	up
NDUFA12	9.44813e-12	-3.57077	2.54259e-07	up
NDUFA13	1.1854e-07	-1.17692	0.00319002	up
NDUFA7	6.79459e-11	-3.30898	1.82849e-06	up
NDUFAF2	1.83056e-15	-1.01962	4.92621e-11	up
NDUFAF8	1.41912e-06	-1.70108	0.03819	up
NDUFB1	9.99018e-11	-2.77359	2.68846e-06	up
NDUFB2	2.04483e-09	-2.23694	5.50284e-05	up
NDUFB6	3.94407e-10	-3.04948	1.06139e-05	up
NDUFB9	2.1357e-10	-3.18286	5.74738e-06	up
NDUFC1	7.7867e-14	-1.5114	2.09548e-09	up
NDUFS2	3.16728e-07	-2.16604	0.00852346	up
NDUFS3	4.27785e-07	-1.71088	0.0115121	up
NDUFS4	1.05055e-07	-3.03291	0.00282715	up
NDUFS5	4.99612e-12	-1.27543	1.34451e-07	up
NDUFS6	1.53282e-07	-1.78864	0.00412497	up
NDUFV2	4.51703e-08	-2.61757	0.00121558	up
NEDD1	7.14997e-07	-2.39982	0.0192413	up
NEK2	2.34402e-09	-2.95805	6.308e-05	up
NFU1	7.26126e-10	-2.39316	1.95408e-05	up
NFYB	2.74577e-10	-2.76109	7.38915e-06	up
NGRN	2.49161e-09	-2.76499	6.70517e-05	up
NHP2	1.17069e-06	-1.95982	0.0315044	up
NIP7	3.31915e-12	-1.91429	8.93217e-08	up
NME2	1.99516e-09	-2.8158	5.36916e-05	up
NMT2	1.70718e-06	-1.42291	0.045942	up
NOC3L	1.03917e-06	-1.44626	0.0279652	up
NOL8	6.58631e-07	-1.79437	0.0177244	up
NOP10	1.06242e-06	-2.08257	0.0285909	up
NPM1	2.4383e-16	-2.86931	6.56171e-12	up
NRAS	1.51603e-08	-1.68599	0.000407979	up
NRBF2	1.2291e-08	-2.53466	0.000330764	up
NSRP1	3.89183e-11	-2.82042	1.04733e-06	up
NSUN3	5.67876e-13	-1.17173	1.52821e-08	up
NT5C3A	1.46675e-07	-2.17119	0.00394717	up
NTMT1	9.07025e-13	-3.01137	2.4409e-08	up
NUCB2	1.17899e-07	-1.97623	0.00317277	up
NUDCD2	8.06795e-17	-3.62405	2.17117e-12	up
NUDT10	1.34539e-08	-1.37867	0.000362057	up
NUP93	2.47971e-07	-2.24629	0.00667315	up
NUPR1	9.61921e-08	-4.07966	0.00258862	up
OARD1	1.19565e-09	-2.80754	3.21761e-05	up
OAZ1	3.83427e-14	-4.08925	1.03184e-09	up
ODC1	4.5151e-07	-2.0992	0.0121506	up
ODF3L2	3.49185e-09	-1.57884	9.39692e-05	up
OFD1	9.78511e-10	-1.65937	2.63327e-05	up
OSTF1	1.66935e-12	-2.64121	4.49238e-08	up
OTUD3	1.28491e-07	-1.14985	0.00345782	up
OTULINL	3.60657e-10	-2.11752	9.70563e-06	up
OVCA2	6.02398e-20	-2.32364	1.62111e-15	up
PABPN1L	8.68982e-09	-1.98271	0.000233852	up
PAM16	4.9071e-10	-3.25174	1.32055e-05	up
PAPOLA	1.80711e-06	-1.20876	0.0486312	up
PARK7	8.7759e-08	-2.50925	0.00236168	up
PARL	8.33161e-10	-2.35145	2.24212e-05	up
PCMT1	4.00913e-12	-2.81211	1.0789e-07	up
PCOLCE2	1.25552e-08	-2.38395	0.000337874	up
PDCD10	6.68353e-11	-2.67747	1.79861e-06	up
PDCD2	1.24671e-06	-1.79843	0.0335503	up
PDCD5	2.42812e-12	-3.633	6.53432e-08	up
PDCD6	6.0013e-07	-2.4795	0.0161501	up
PDHB	1.72458e-09	-2.60144	4.64101e-05	up
PET100	8.71276e-07	-2.66269	0.0234469	up
PEX2	4.09941e-08	-1.46672	0.00110319	up
PFDN2	2.58911e-08	-2.85257	0.000696755	up
PFDN5	6.93243e-16	-4.08235	1.86559e-11	up
PHAX	3.65413e-09	-2.70197	9.83363e-05	up
PHB	4.7413e-10	-2.29665	1.27593e-05	up
PHF5A	2.3286e-11	-2.9914	6.26648e-07	up
PHPT1	1.29963e-06	-1.24101	0.0349743	up
PIGF	7.68794e-08	-2.50483	0.0020689	up
PIMREG	1.47316e-06	-2.24886	0.0396442	up
PLAAT3	3.65569e-08	-1.98072	0.000983782	up
PNISR	4.15875e-09	-1.98187	0.000111916	up
PNKD	8.60495e-10	-2.15317	2.31568e-05	up
PNRC2	8.71245e-08	-2.30597	0.00234461	up
POLE4	2.87787e-07	-2.29798	0.00774463	up
POLG2	1.80106e-07	-1.01694	0.00484682	up
POLR1D	2.03213e-09	-2.57436	5.46867e-05	up
POLR2F	5.72106e-14	-3.99462	1.53959e-09	up
POLR2H	4.18064e-10	-2.71099	1.12505e-05	up
POLR2K	1.42815e-14	-4.09987	3.8433e-10	up
POLR3H	2.34043e-14	-2.30719	6.29834e-10	up
POMP	3.00907e-12	-2.9906	8.0977e-08	up
PPA1	1.96347e-07	-1.7953	0.00528389	up
PPIL4	4.26404e-10	-2.9833	1.1475e-05	up
PPM1G	7.1435e-14	-3.32571	1.92239e-09	up
PPP1R12A	6.81143e-12	-2.40714	1.83302e-07	up
PPP1R2	1.22135e-09	-2.28043	3.28678e-05	up
PPP2R3C	3.39708e-12	-2.961	9.14189e-08	up
PQLC3	1.29527e-06	-1.09589	0.0348569	up
PRDX2	5.88013e-12	-4.56606	1.5824e-07	up
PRDX4	3.40925e-10	-2.70778	9.17464e-06	up
PRMT1	3.52345e-09	-2.15382	9.48197e-05	up
PRPF38B	1.8342e-07	-1.52271	0.004936	up
PRPF40A	2.47103e-07	-1.53562	0.00664978	up
[truncated: 268 more rows]

## Sheet: GO enrichment of O4C up genes
GO enrichment of upregulated genes in O4C
Category	Term	Count	%	P-value	Genes
GOTERM_BP_DIRECT	GO:0006412~translation	82	9.60187	1.7948e-43	MRPS17, RPL3, RPL34, MRPS12, RPL10A, RPL9, MRPL32, MRPL33, RPS4X, MRPL41, LOC106993579, RPS14, RPS17, RPS19, LOC706087, ZAR1L, RPS18, RPL36AL, LOC706606, RPL36, LOC694967, RPL35, RPL38, LOC703853, RPL37, LOC107000809, RPL39, RPS12, LOC717289, RPS9, RPL21, RPL23, MRPS23, LOC107000401, MRPL47, LOC718737, C18H18ORF32, MRPS7, MRPS18C, MRPL52, MRPS9, LOC712987, MRPL51, RPL37A, RPL27, LOC702514, RPL26,…
GOTERM_BP_DIRECT	GO:0002181~cytoplasmic translation	23	2.69321	4.42492e-14	RPL30, LOC716530, RPLP1, RPL35A, LOC107000401, C18H18ORF32, RPL10A, RPL9, LOC696134, RPS14, RPS29, RPL36, RPL24, RPL38, RPL26, RPL15, RPL29, RPL18, RPS21, LOC107000809, RPL39, ZC3H15, RPS23
GOTERM_BP_DIRECT	GO:0000398~mRNA splicing, via spliceosome	27	3.16159	3.76886e-11	RBM8A, EIF4A3, LOC114680234, U2AF1, SNU13, HTATSF1, UBL5, TXNL4A, SNRNP35, PRPF38B, BUD31, PRPF40A, CWC15, LSM4, LSM3, PHF5A, SNW1, LSM6, LOC107000998, NHP2, SRSF3, SNRPA1, SNRPE, SNRPF, SLU7, SRSF7, SNRPB
GOTERM_BP_DIRECT	GO:0032981~mitochondrial respiratory chain complex I assembly	15	1.75644	1.21202e-08	NDUFB9, COA1, NDUFA12, NDUFA10, NDUFA1, NDUFB2, BCS1L, LOC114669847, NDUFAF8, NDUFS5, NDUFS4, TMEM126A, NDUFAF2, NDUFS3, TMEM126B
GOTERM_BP_DIRECT	GO:0042274~ribosomal small subunit biogenesis	12	1.40515	3.92033e-07	LTV1, RPS4X, EMG1, NPM1, RPS9, RPS19BP1, KRR1, LOC706087, AK6, AATF, RPS23, RPS12
GOTERM_BP_DIRECT	GO:0000027~ribosomal large subunit assembly	10	1.17096	2.86757e-06	MRPL20, LOC106993579, LOC693573, RPL3, RPL10, LOC706606, RRS1, RPL23A, BRIX1, LOC718737
GOTERM_BP_DIRECT	GO:0006120~mitochondrial electron transport, NADH to ubiquinone	9	1.05386	3.20634e-06	NDUFB9, NDUFA7, NDUFB6, NDUFS6, NDUFA10, NDUFS3, NDUFS2, NDUFV2, TOPORS
GOTERM_BP_DIRECT	GO:0000387~spliceosomal snRNP assembly	9	1.05386	4.34832e-06	SNRPD2, LOC107000998, SNRPD1, STRAP, SNRPE, SNRPD3, SNRPF, LSM4, SNRPB
GOTERM_BP_DIRECT	GO:0042273~ribosomal large subunit biogenesis	10	1.17096	9.4574e-06	EBNA1BP2, NPM1, NIP7, RRS1, RPL35A, ZNF622, RPL26, MALSU1, GTPBP4, LOC696134
GOTERM_BP_DIRECT	GO:0032543~mitochondrial translation	8	0.936768	4.56282e-05	RARS2, MRPS17, MRPL52, FASTKD2, MRPL47, MRPL57, MRPL43, MRPS18C
GOTERM_BP_DIRECT	GO:0006364~rRNA processing	14	1.63934	5.8933e-05	KRR1, EIF4A3, RPL35A, NOL8, DDX10, AK6, EXOSC7, EBNA1BP2, LSM6, NHP2, RPL27, BRIX1, EXOSC3, NOP10
GOTERM_BP_DIRECT	GO:0042255~ribosome assembly	5	0.58548	0.000179612	EIF5B, EIF5, EIF1AX, NIP7, MRPL22
GOTERM_BP_DIRECT	GO:0006413~translational initiation	8	0.936768	0.000356066	EIF5B, EIF5, EIF1AX, LOC718407, EIF2S2, EIF1B, LOC114677626, EIF1
GOTERM_BP_DIRECT	GO:0006123~mitochondrial electron transport, cytochrome c to oxygen	9	1.05386	0.000374322	COX8A, COX7A2L, LOC696956, LOC114674848, CYCS, LOC106996000, LOC717879, COX6C, LOC106995399
GOTERM_BP_DIRECT	GO:0007059~chromosome segregation	9	1.05386	0.00179528	CENPW, UBE2I, PTTG1, NTMT1, RAD21L1, BIRC5, NEK2, CIAO2B, SLC25A5
GOTERM_BP_DIRECT	GO:0008380~RNA splicing	12	1.40515	0.00186102	RBM25, SNRPD2, RBM8A, EIF4A3, MAGOH, SRSF2, LOC114680234, SRSF3, STRAP, SLU7, SRSF11, BCAS2
GOTERM_BP_DIRECT	GO:0000028~ribosomal small subunit assembly	7	0.819672	0.00365051	RPS14, RPS28, RPS27, RPS19, RPS27L, LOC694967, MRPS7
GOTERM_BP_DIRECT	GO:0007346~regulation of mitotic cell cycle	7	0.819672	0.00365051	RPA3, CDC26, GMNN, CKS2, AATF, CDK5RAP3, CKS1B
GOTERM_BP_DIRECT	GO:0051301~cell division	17	1.99063	0.00386085	TIGAR, BOD1, SEPTIN2, HAUS3, CIB1, SMC3, NDC80, SEPTIN7, CKS1B, HERC5, CCNB1, PTTG1, CDK4, CDC26, CKS2, BIRC5, MAD2L1
GOTERM_BP_DIRECT	GO:0043248~proteasome assembly	4	0.468384	0.00457638	SEM1, PSMD11, POMP, PSMG2
GOTERM_BP_DIRECT	GO:0045727~positive regulation of translation	7	0.819672	0.00462448	FXR1, RPS4X, SSB, PRMT1, EIF4A3, UPF3B, UPF3A
GOTERM_BP_DIRECT	GO:0044772~mitotic cell cycle phase transition	5	0.58548	0.00504168	CCNB1, TMOD3, CCNG2, CKS2, CKS1B
GOTERM_BP_DIRECT	GO:0030150~protein import into mitochondrial matrix	5	0.58548	0.00719211	DNAJC19, PAM16, TIMM17A, TOMM7, TIMM50
GOTERM_BP_DIRECT	GO:0043161~proteasome-mediated ubiquitin-dependent protein catabolic process	18	2.10773	0.00836108	SSB, NDUFB6, FBXW7, CISD1, PSMA7, TOPORS, RBX1, PSMB6, PSMA5, PSMA6, PSMB7, SH3BGRL, PSMB4, PSMA4, PSMC4, DDIT3, SPOP, PSMD1
GOTERM_BP_DIRECT	GO:0000463~maturation of LSU-rRNA from tricistronic rRNA transcript (SSU-rRNA, 5.8S rRNA, LSU-rRNA)	5	0.58548	0.00846322	LOC701250, ZNHIT6, RPL35, GTPBP4, RPL7
GOTERM_BP_DIRECT	GO:0033962~P-body assembly	4	0.468384	0.0124733	RC3H1, LSM14A, LSM4, LSM3
GOTERM_BP_DIRECT	GO:0000184~nuclear-transcribed mRNA catabolic process, nonsense-mediated decay	5	0.58548	0.0131282	RBM8A, EIF4A3, UPF3B, UPF3A, PNRC2
GOTERM_BP_DIRECT	GO:0000381~regulation of alternative mRNA splicing, via spliceosome	7	0.819672	0.0148361	FXR1, RBM25, RBM8A, SRSF2, SAP18, RBM7, NSRP1
GOTERM_BP_DIRECT	GO:0051603~proteolysis involved in protein catabolic process	6	0.702576	0.0151394	PSMB6, DNAJC3, PSMB7, PSMB4, PSMB1, PSMA7
GOTERM_BP_DIRECT	GO:0030490~maturation of SSU-rRNA	4	0.468384	0.0151821	RPS28, LSM6, SNU13, RIOK2
GOTERM_BP_DIRECT	GO:1990145~maintenance of translational fidelity	3	0.351288	0.0175372	LOC706087, RPS23, RPS12
GOTERM_BP_DIRECT	GO:0045292~mRNA cis splicing, via spliceosome	4	0.468384	0.021517	RBM17, PRPF40A, CWC15, SRSF7
GOTERM_BP_DIRECT	GO:0001824~blastocyst development	4	0.468384	0.021517	EMG1, PSMC4, MED21, NEK2
GOTERM_BP_DIRECT	GO:0000462~maturation of SSU-rRNA from tricistronic rRNA transcript (SSU-rRNA, 5.8S rRNA, LSU-rRNA)	5	0.58548	0.0295314	RPS14, UTP6, GTF2H5, LOC698056, DCAF13
GOTERM_BP_DIRECT	GO:0000447~endonucleolytic cleavage in ITS1 to separate SSU-rRNA from 5.8S rRNA and LSU-rRNA from tricistronic rRNA transcript (SSU-rRNA, 5.8S rRNA, LSU-rRNA)	3	0.351288	0.0312132	RPP40, RRS1, RPS21
GOTERM_BP_DIRECT	GO:0042254~ribosome biogenesis	6	0.702576	0.0329718	RPL7A, RRS1, SNU13, RIOK2, NOP10, GTPBP4
GOTERM_BP_DIRECT	GO:0000380~alternative mRNA splicing, via spliceosome	4	0.468384	0.0333258	RBM17, STRAP, SLU7, BCAS2
GOTERM_BP_DIRECT	GO:0043066~negative regulation of apoptotic process	18	2.10773	0.037082	MRE11, CIB1, VTCN1, LOC698256, HYPK, MTDH, DNAJC3, BMP4, MYDGF, PDCD10, LOC694887, LOC702864, BIRC5, NAA15, PTMA, LOC701473, LAMTOR5, MAD2L1
GOTERM_BP_DIRECT	GO:0006367~transcription initiation at RNA polymerase II promoter	5	0.58548	0.0391063	GTF2A2, TAF11, ELOC, GTF2F2, GTF2H5
GOTERM_BP_DIRECT	GO:0006099~tricarboxylic acid cycle	5	0.58548	0.0426467	SUCLA2, MDH1, SUCLG1, SDHA, SDHB
GOTERM_BP_DIRECT	GO:0051028~mRNA transport	5	0.58548	0.0426467	FXR1, NUP93, RBM8A, EIF4A3, MAGOH
GOTERM_BP_DIRECT	GO:0030162~regulation of proteolysis	3	0.351288	0.0478446	SPOP, PARL, LOC704026

## Sheet: GO enrichment of O4C down genes
GO enrichment of downregulated genes in O4C
Category	Term	Count	%	P-value	Genes
GOTERM_BP_DIRECT	GO:0016579~protein deubiquitination	16	1.17388	4.81527e-05	OTUB2, USP35, OTUD4, OTUD5, PSMD14, USP5, USP31, USP34, OTUD7A, USP39, USP19, UCHL5, UCHL1, LOC106996741, BAP1, OTUB1
GOTERM_BP_DIRECT	GO:0071108~protein K48-linked deubiquitination	9	0.660308	5.25036e-05	OTUB2, OTUD4, OTUD5, USP5, USP34, OTUD7A, OTUD7B, BAP1, OTUB1
GOTERM_BP_DIRECT	GO:0045944~positive regulation of transcription by RNA polymerase II	67	4.91563	5.47538e-05	THRB, CRTC3, CRTC1, CITED2, WASL, FOXM1, PKD1, IKZF4, MECP2, MED13, ZMIZ1, ZMIZ2, POGZ, NCK2, EP300, MYBL2, NKX3-1, CDON, PELP1, BRD3, NCOA2, KLF12, NCOA6, TFE3, MRTFB, MRTFA, AP3B1, PPRC1, SREBF2, RUNX1, HCFC1, RGMA, GREM1, MED25, TET3, RARA, PPARA, SKAP1, ENG, HDAC4, KMT2D, AKNA, MAX, KMT2C, DOT1L, PIK3R2, PRDM10, MED12L, SLC9A1, GLIS2, PCBP1, HIVEP1, ZBTB18, WWOX, JUP, DAB2IP, AP3D1, NFATC2, A…
GOTERM_BP_DIRECT	GO:0030036~actin cytoskeleton organization	22	1.61409	0.000173372	STARD13, DMTN, ARHGEF17, MINK1, LIMK1, FMN1, WASL, FMN2, PARVB, SPTB, DIAPH1, PAK1, FMNL2, CAPZB, ELMO1, FLNA, THSD7A, ASB2, PFN1, SMTNL2, RNF185, WASF3
GOTERM_BP_DIRECT	GO:0070536~protein K63-linked deubiquitination	8	0.586941	0.000639149	OTUB2, BABAM1, OTUD4, OTUD5, PSMD14, OTUD7A, OTUD7B, SPATA2
GOTERM_BP_DIRECT	GO:0006884~cell volume homeostasis	7	0.513573	0.00122997	SLC12A5, STK39, LRRC8A, E2F4, SLC12A6, LRRC8E, SLC12A8
GOTERM_BP_DIRECT	GO:0090063~positive regulation of microtubule nucleation	4	0.29347	0.00152803	MECP2, PAK1, DCTN1, GIT1
GOTERM_BP_DIRECT	GO:0000122~negative regulation of transcription by RNA polymerase II	60	4.40205	0.00236018	THRB, CITED2, OTUD7B, CHD4, FOXM1, PHF6, MECP2, ELK4, FLCN, SALL2, SUFU, SAP130, DNMT3B, NCK2, EP300, HMG20A, ZNF169, NKX3-1, PIAS4, ZBTB39, NCOA2, KLF11, ZHX2, TGIF2, PEG3, DNMT3A, NCOR2, MED25, LOC697149, BRMS1, BIN1, RARA, PPARA, BCORL1, HDAC4, DNMT1, NOTCH1, ZNF195, UHRF1, NPAS1, ZBTB4, ZBTB2, GLIS2, PCBP3, LOC695755, DNAJB5, ATXN1L, NSD2, BEND3, STAT6, RBBP7, SEMA4D, CBX2, PCGF2, DAB2IP, BMP…
GOTERM_BP_DIRECT	GO:0006511~ubiquitin-dependent protein catabolic process	22	1.61409	0.00238326	UHRF1, SIAH3, SMURF1, RNF14, UBR4, NEDD4L, RNF19B, UCHL5, UBE2L3, CNOT4, RNF144A, UCHL1, RNF114, OS9, WDR81, TP53INP2, EPG5, ARIH1, DISC1, RNF185, RNF111, BAP1
GOTERM_BP_DIRECT	GO:0000289~nuclear-transcribed mRNA poly(A) tail shortening	5	0.366838	0.00316084	PAN3, CNOT3, SAMD4A, SAMD4B, MLH1
GOTERM_BP_DIRECT	GO:0007266~Rho protein signal transduction	9	0.660308	0.00433536	GNA13, ARHGEF12, ITGA3, ARHGDIA, NCK2, LOC719690, TAX1BP3, EPS8L3, ARHGAP35
GOTERM_BP_DIRECT	GO:0043588~skin development	7	0.513573	0.00436527	ADAMTS2, TRAF3IP2, JUP, ITGA3, SUFU, CTNNB1, PKD1
GOTERM_BP_DIRECT	GO:0072659~protein localization to plasma membrane	17	1.24725	0.00542379	JUP, SMURF1, STXBP1, DENND4C, LYPD1, ZDHHC5, EFR3B, PRAM1, PACS1, AKT2, TSPAN17, FLNA, CTNNB1, LOC114675416, GPR158, SKAP1, CRB3
GOTERM_BP_DIRECT	GO:0070050~neuron cellular homeostasis	6	0.440205	0.00600408	SLC24A2, FGGY, DCTN1, TYRO3, DISC1, BAP1
GOTERM_BP_DIRECT	GO:0006338~chromatin remodeling	18	1.32062	0.00709491	RERE, BRD3, INO80E, RING1, SATB1, PCGF2, FBXL19, C4H6ORF89, CHD4, NPM3, ARID1A, CHD2, HCFC1, CARM1, SCMH1, WAC, LOC700765, RBBP7
GOTERM_BP_DIRECT	GO:0001701~in utero embryonic development	20	1.46735	0.00824565	JAG2, ATF2, PTPRR, NOTCH1, PCGF2, ADAM10, OTUD7B, ATP11A, TERF2, TANC2, CMIP, GNA13, CAMSAP3, FLCN, ZMIZ1, MYO18B, CTNNB1, PLCG1, APBA3, BAP1
GOTERM_BP_DIRECT	GO:0071320~cellular response to cAMP	7	0.513573	0.00844335	HCN4, DMTN, CRTC3, CRTC1, KCNQ1, AKAP6, HCN2
GOTERM_BP_DIRECT	GO:0022604~regulation of cell morphogenesis	6	0.440205	0.00884754	CLDN4, FMNL2, ZMYM3, CAPZB, CFL1, LARP4
GOTERM_BP_DIRECT	GO:0016477~cell migration	22	1.61409	0.00956439	JUP, ITGB4, NDE1, ASAP3, NFATC2, CDC42BPB, LAMC1, PTPRK, FMN2, CDH8, RND1, PAK1, FMNL2, PEAK1, NCK2, TYRO3, CTNNB1, CTNNA3, PLCG1, CORO7, GPC6, ENG
GOTERM_BP_DIRECT	GO:0070262~peptidyl-serine dephosphorylation	4	0.29347	0.0108679	PPP6C, PPP2CB, LOC114675532, PPP2R2C
GOTERM_BP_DIRECT	GO:0006623~protein targeting to vacuole	5	0.366838	0.0121992	GID4, VPS13D, VPS37C, AP3D1, LOC114675519
GOTERM_BP_DIRECT	GO:0030514~negative regulation of BMP signaling pathway	8	0.586941	0.0122345	GREM1, NOTCH1, SMURF1, HTRA3, CRIM1, CHRDL2, TRIM33, HIPK2
GOTERM_BP_DIRECT	GO:0010467~gene expression	16	1.17388	0.0138457	DDC, EDA, TCF12, DOT1L, FMN1, CHD2, HIPK2, MECP2, BLOC1S6, NPC1, ANKH, KBTBD2, GRB10, EPG5, SP7, BAP1
GOTERM_BP_DIRECT	GO:0042147~retrograde transport, endosome to Golgi	10	0.733676	0.0142224	GGA1, RNF126, DCTN1, GBF1, DENND5A, PHETA1, WASHC1, RAB6B, SNX5, RAB7A
GOTERM_BP_DIRECT	GO:0030032~lamellipodium assembly	6	0.440205	0.0146679	DMTN, CAPZB, NCK2, PARVB, ARHGEF7, WASF3
GOTERM_BP_DIRECT	GO:0086091~regulation of heart rate by cardiac conduction	7	0.513573	0.0147163	HCN4, JUP, BIN1, KCNQ1, CTNNB1, CTNNA3, DCAF7
GOTERM_BP_DIRECT	GO:0061909~autophagosome-lysosome fusion	4	0.29347	0.0148977	TOM1, PLEKHM1, PIP4K2A, PIP4K2B
GOTERM_BP_DIRECT	GO:0047496~vesicle transport along microtubule	5	0.366838	0.0150145	NDE1, KIF13B, HTT, TRAK1, RASGRP1
GOTERM_BP_DIRECT	GO:0035855~megakaryocyte development	5	0.366838	0.0150145	GP9, MPIG6B, EP300, PIP4K2A, ZNF385A
GOTERM_BP_DIRECT	GO:0050770~regulation of axonogenesis	5	0.366838	0.0150145	PAK1, SIPA1L1, KIF13B, ARHGAP35, MARK2
GOTERM_BP_DIRECT	GO:0034394~protein localization to cell surface	6	0.440205	0.0170678	GGA1, PIGU, CTNNB1, FLNA, AP3B1, PTPRK
GOTERM_BP_DIRECT	GO:0046856~phosphatidylinositol dephosphorylation	6	0.440205	0.0170678	MTMR3, INPP5A, INPP5F, INPP5J, SYNJ2, MTMR7
GOTERM_BP_DIRECT	GO:0002244~hematopoietic progenitor cell differentiation	9	0.660308	0.0181129	SMPD3, ATF2, PTPRZ1, CITED2, AP3B1, ADAR, ESCO2, ARHGEF7, EEF2
GOTERM_BP_DIRECT	GO:0003016~respiratory system process	5	0.366838	0.0182075	JAG2, BLOC1S6, FLT4, AP3B1, HIPK2
GOTERM_BP_DIRECT	GO:0016082~synaptic vesicle priming	5	0.366838	0.0182075	UNC13C, RIMS3, STXBP1, SNAP23, CADPS
GOTERM_BP_DIRECT	GO:0043161~proteasome-mediated ubiquitin-dependent protein catabolic process	23	1.68745	0.0185838	WDR26, AREL1, PSMD14, SIAH3, SMURF1, FBXL19, SYVN1, UBR4, NEDD4L, KCTD2, AMBRA1, KLHL30, DDB1, BAG6, PPP2CB, GID4, RMND5A, MAEA, GAN, KBTBD2, CTNNB1, ASB2, RNF187
GOTERM_BP_DIRECT	GO:0048490~anterograde synaptic vesicle transport	4	0.29347	0.0196584	BLOC1S6, BLOC1S3, AP3D1, AP3B1
GOTERM_BP_DIRECT	GO:0035871~protein K11-linked deubiquitination	4	0.29347	0.0196584	OTUB2, OTUD4, OTUD7A, OTUD7B
GOTERM_BP_DIRECT	GO:0048870~cell motility	6	0.440205	0.0197142	MAP2K1, LOC705671, ITGB4, CFL1, ELMO1, PLD2
GOTERM_BP_DIRECT	GO:0007165~signal transduction	47	3.44828	0.0203925	YWHAE, GRB7, PTPRR, NDRG3, PEX11A, FAM13A, DIRAS2, HTT, PIK3R2, ARHGAP39, PTPRK, DUSP16, ARHGAP35, RND1, ARHGAP44, GABRR3, CLEC1A, DUSP10, PTPRZ1, RASSF5, GRB10, RAC2, TOM1, STAT6, MAP3K9, RHPN2, PDE8B, SH2B1, STARD13, SEMA4D, GAB1, ARHGAP27, ARAP1, GAB2, DUSP8, GAB4, DUSP7, TOM1L2, ARHGAP32, ARHGAP10, ARHGAP31, MRAS, LOC705681, GNB2, RIN3, OR7E24, CSNK1G1
GOTERM_BP_DIRECT	GO:0030041~actin filament polymerization	6	0.440205	0.0226156	DIAPH1, PSTPIP2, SPIRE1, WASL, CORO7, GAS7
GOTERM_BP_DIRECT	GO:0007010~cytoskeleton organization	10	0.733676	0.0233178	ARHGAP10, DMTN, MAEA, ZMYM3, GAN, PADI6, MAST2, CDC42BPB, LARP4, FGD2
GOTERM_BP_DIRECT	GO:0010633~negative regulation of epithelial cell migration	4	0.29347	0.0251575	PTPRR, DUSP10, DAB2IP, PTPN23
GOTERM_BP_DIRECT	GO:0045022~early endosome to late endosome transport	5	0.366838	0.0257758	WDR81, WDR91, LMTK2, PTPN23, RAB7A
GOTERM_BP_DIRECT	GO:0042789~mRNA transcription by RNA polymerase II	7	0.513573	0.0263598	ATF2, THRB, EPAS1, TAF8, RARA, AP3B1, TAF4
GOTERM_BP_DIRECT	GO:0060306~regulation of membrane repolarization	3	0.220103	0.0270661	YWHAE, NEDD4L, AKAP6
GOTERM_BP_DIRECT	GO:1901380~negative regulation of potassium ion transmembrane transport	3	0.220103	0.0270661	BIN1, STK39, NEDD4L
GOTERM_BP_DIRECT	GO:0050882~voluntary musculoskeletal movement	3	0.220103	0.0270661	ITPR1, XRCC1, HIPK2
GOTERM_BP_DIRECT	GO:0031398~positive regulation of protein ubiquitination	8	0.586941	0.0277794	AMER1, MAPK9, RASSF5, RNF180, TBC1D7, SENP2, TICAM1, RNF111
GOTERM_BP_DIRECT	GO:0048589~developmental growth	5	0.366838	0.0301695	PYGO2, NOTCH1, ZMIZ1, KDF1, EIF4H
GOTERM_BP_DIRECT	GO:0098656~monoatomic anion transmembrane transport	4	0.29347	0.0313942	SLC13A3, LRRC8A, LRRC8B, LRRC8E
GOTERM_BP_DIRECT	GO:0006612~protein targeting to membrane	7	0.513573	0.0356617	ZDHHC18, MYO1C, EXOC4, VPS37C, LOC114675519, GOLGA7, ZDHHC14
GOTERM_BP_DIRECT	GO:0050982~detection of mechanical stimulus	4	0.29347	0.0383602	JUP, CTNNB1, PIEZO1, PKD1
GOTERM_BP_DIRECT	GO:0051893~regulation of focal adhesion assembly	4	0.29347	0.0383602	GREM1, CAMSAP3, MACF1, PEAK1
GOTERM_BP_DIRECT	GO:0044027~negative regulation of gene expression via chromosomal CpG island methylation	4	0.29347	0.0383602	MECP2, DNMT1, UHRF1, DNMT3A
GOTERM_BP_DIRECT	GO:0007613~memory	8	0.586941	0.0391223	SLC24A2, BLOC1S6, ITGA3, CRTC1, ATXN1L, VPS13B, PAIP2, KALRN
GOTERM_BP_DIRECT	GO:0003254~regulation of membrane depolarization	3	0.220103	0.0391337	HCN4, NEDD4L, HCN2
GOTERM_BP_DIRECT	GO:0060059~embryonic retina morphogenesis in camera-type eye	3	0.220103	0.0391337	HIPK1, HIPK2, CDON
GOTERM_BP_DIRECT	GO:0140361~cyclic-GMP-AMP transmembrane import across plasma membrane	3	0.220103	0.0391337	LRRC8A, LRRC8B, LRRC8E
GOTERM_BP_DIRECT	GO:0032816~positive regulation of natural killer cell activation	3	0.220103	0.0391337	BLOC1S6, BLOC1S3, TICAM1
GOTERM_BP_DIRECT	GO:0098885~modification of postsynaptic actin cytoskeleton	3	0.220103	0.0391337	PFN1, SPTB, WASF3
GOTERM_BP_DIRECT	GO:0046488~phosphatidylinositol metabolic process	5	0.366838	0.0402038	PLCB3, MTMR3, PIP4K2A, PIP4K2B, PLCG1
GOTERM_BP_DIRECT	GO:0021915~neural tube development	5	0.366838	0.0402038	NOTCH1, SALL2, AMBRA1, PKD1, GRHL2
GOTERM_BP_DIRECT	GO:0000209~protein polyubiquitination	14	1.02715	0.0429043	AREL1, MGRN1, SMURF1, RNF14, RNF180, RNF19B, AMBRA1, UBE2L3, DDA1, RNF144A, RNF114, CTNNB1, ARIH1, RNF111
GOTERM_BP_DIRECT	GO:0031647~regulation of protein stability	10	0.733676	0.0437587	USP35, TMEM183A, USP5, SIAH3, DAD1, USP34, NEDD4L, USP19, LOC106996741, B4GALT5
GOTERM_BP_DIRECT	GO:0016567~protein ubiquitination	27	1.98092	0.0447234	MGRN1, FBH1, RNF14, UHRF1, UBR4, NEDD4L, RNF19B, PRPF19, PHRF1, SH3RF1, RNF114, OS9, ARIH1, VPS18, RING1, SMURF1, SIAH3, SYVN1, CNOT4, DDB1, RNF126, GAN, FBXL3, ASB2, RNF185, ZNF598, TRIM33
GOTERM_BP_DIRECT	GO:0043488~regulation of mRNA stability	5	0.366838	0.0458486	PIAS4, CSDC2, SAMD4A, SAMD4B, RBM33
GOTERM_BP_DIRECT	GO:0099175~regulation of postsynapse organization	5	0.366838	0.0458486	LRFN2, DGKB, ADAM10, WASL, DISC1
GOTERM_BP_DIRECT	GO:0043627~response to estrogen	4	0.29347	0.0460409	KMT2D, RBBP5, CITED2, EP300
GOTERM_BP_DIRECT	GO:0045820~negative regulation of glycolytic process	4	0.29347	0.0460409	HDAC4, FLCN, PPARA, GIT1
GOTERM_BP_DIRECT	GO:0090090~negative regulation of canonical Wnt signaling pathway	13	0.953778	0.047218	AMER1, OTUD5, TLE2, GSK3A, NOTCH1, FZD6, DAB2IP, FOXO3, TPBGL, NKD1, GREM1, CTNNB1, EMD
