# Supplementary material
Source: Research Square preprint supplement (doi:10.21203/rs.3.rs-7771199/v1)
Supplement: Supplementary file 10 [file 8839cf55abc1c88e52f37746.xlsx]

## Sheet: DEG in Omor vs Ymor
Differentially expressed genes in Omor vs Ymor
Gene symbol	P-value	Log2FoldChange	Adjusted P-value	Status
ABCB1	5.5479e-12	1.4748	1.59458e-07	up
ABCB9	3.79756e-14	1.45288	1.09149e-09	up
ABCD4	2.46844e-14	1.59179	7.0948e-10	up
ABI3	2.28953e-22	1.23184	6.58056e-18	up
ACADS	3.74457e-16	1.0589	1.07626e-11	up
ACSBG2	9.95978e-11	1.00526	2.86264e-06	up
ACSM3	3.93459e-14	1.54843	1.13088e-09	up
ADCY3	7.65379e-17	1.79829	2.19985e-12	up
ADGRG2	3.48727e-26	1.39881	1.00231e-21	up
ADGRL2	1.00794e-14	1.03039	2.89701e-10	up
ADNP2	4.4332e-14	1.41367	1.27419e-09	up
AEN	5.25375e-10	1.50681	1.51003e-05	up
AFMID	2.20152e-08	1.09842	0.000632761	up
AGAP1	3.8032e-22	1.20458	1.09312e-17	up
AGFG2	2.64463e-20	1.83559	7.60119e-16	up
AIF1L	1.32169e-06	1.19043	0.0379879	up
AKT1S1	1.04407e-11	1.18625	3.00087e-07	up
ANGPTL1	5.67513e-11	1.01976	1.63115e-06	up
ANGPTL4	7.15896e-19	2.4285	2.05763e-14	up
ANGPTL6	1.91372e-12	1.34808	5.50042e-08	up
ANKRD54	3.32799e-07	1.04153	0.0095653	up
ANO2	6.11189e-21	1.10666	1.75668e-16	up
ANXA10	1.10683e-72	2.46286	3.18126e-68	up
AP4M1	1.13131e-07	1.12519	0.0032516	up
APAF1	2.65366e-24	1.60999	7.62715e-20	up
APBA2	5.04487e-16	1.5627	1.45e-11	up
ARMC7	1.89548e-30	1.43658	5.44799e-26	up
ARRDC2	1.51423e-07	1.23726	0.0043522	up
ASAP3	9.5885e-76	1.93838	2.75593e-71	up
ASB6	1.4657e-06	1.08514	0.0421272	up
ASIC2	6.72827e-19	1.40928	1.93384e-14	up
ATF6B	1.02511e-20	1.40553	2.94637e-16	up
ATG13	6.67059e-10	1.16637	1.91726e-05	up
ATG14	5.72876e-09	1.13478	0.000164656	up
ATP1B2	6.51086e-11	2.40316	1.87135e-06	up
ATP6V1C2	2.00319e-16	2.16291	5.75757e-12	up
ATPSCKMT	6.68473e-13	1.22968	1.92132e-08	up
ATXN1	1.07321e-13	1.12157	3.08461e-09	up
B3GNT9	2.72696e-52	1.58464	7.83782e-48	up
BATF2	9.40437e-21	1.53865	2.703e-16	up
BBS12	7.49992e-19	1.42678	2.15563e-14	up
BCKDHA	6.42648e-11	1.20664	1.8471e-06	up
BCO2	1.91766e-44	2.957	5.51173e-40	up
BICDL1	2.31539e-11	1.10038	6.65489e-07	up
BMP6	9.73312e-21	1.88299	2.79749e-16	up
C11H12orf43	9.49804e-16	1.24391	2.72993e-11	up
C11H12orf76	1.03141e-09	1.58138	2.96448e-05	up
C13H2orf42	7.03559e-07	1.0742	0.0202217	up
C16H17orf107	1.65085e-17	1.32198	4.74486e-13	up
C16H17orf58	3.42917e-10	1.29245	9.85611e-06	up
C18H18orf21	7.70992e-08	1.04065	0.00221599	up
C19H19orf12	2.79699e-09	1.12851	8.03911e-05	up
C2CD2L	6.5675e-15	1.0024	1.88763e-10	up
C2H3orf20	1.59489e-35	1.13633	4.58403e-31	up
C7H15orf41	3.18112e-07	1.08078	0.00914316	up
CACNB3	6.46647e-15	2.32309	1.85859e-10	up
CAMKK2	1.39517e-08	1.06007	0.000400999	up
CAMSAP2	1.80731e-22	1.04563	5.19458e-18	up
CASC4	2.19642e-09	1.29681	6.31294e-05	up
CASP2	2.09224e-11	1.36857	6.01352e-07	up
CBLC	1.09592e-14	2.13221	3.1499e-10	up
CCDC113	1.21306e-08	1.03922	0.000348657	up
CCDC137	1.37388e-07	1.15148	0.00394882	up
CCDC14	1.37964e-17	1.34821	3.96536e-13	up
CD164L2	5.97418e-14	1.8756	1.7171e-09	up
CD59	1.97387e-09	1.78379	5.6733e-05	up
CD9	4.05195e-10	1.49552	1.16461e-05	up
CDH17	1.58066e-06	1.88788	0.0454314	up
CDH5	7.12416e-09	1.0392	0.000204763	up
CDIPT	5.97341e-07	1.02575	0.0171688	up
CDK20	2.1015e-08	1.37633	0.000604012	up
CDK9	3.83082e-08	1.08901	0.00110105	up
CDV3	1.08963e-09	1.62938	3.13181e-05	up
CEP83	1.163e-11	1.03011	3.34268e-07	up
CHGA	2.21958e-10	1.0387	6.37951e-06	up
CIZ1	5.24914e-08	1.14013	0.00150871	up
CLASRP	7.92032e-17	1.0026	2.27646e-12	up
CLEC4G	1.30836e-12	2.12155	3.76049e-08	up
CMKLR1	5.70543e-36	1.68565	1.63986e-31	up
CNEP1R1	9.72171e-13	1.50158	2.79421e-08	up
CNKSR1	2.35248e-20	1.21432	6.7615e-16	up
CNKSR2	3.73555e-31	1.9768	1.07367e-26	up
CNTLN	4.17303e-18	1.001	1.19941e-13	up
COCH	9.21004e-22	1.39344	2.64715e-17	up
COMMD10	1.69778e-06	1.09908	0.0487977	up
CPT1C	6.24072e-28	1.94371	1.79371e-23	up
CRAMP1	5.09735e-44	1.56196	1.46508e-39	up
CRISPLD2	2.60734e-15	1.5893	7.49402e-11	up
CRPPA	5.27677e-19	1.22372	1.51665e-14	up
CRYAB	1.49619e-53	1.6761	4.30035e-49	up
CSGALNACT2	1.14393e-07	1.63037	0.00328788	up
CTCFL	8.4564e-08	1.77746	0.00243054	up
CTNNAL1	1.04519e-06	1.11202	0.0300408	up
CTPS2	5.17157e-29	1.43839	1.48641e-24	up
CTSF	9.03664e-09	1.4697	0.000259731	up
CYHR1	7.6804e-17	1.26707	2.2075e-12	up
DAGLB	8.30847e-07	1.11269	0.0238802	up
DBF4B	2.20025e-10	1.62315	6.32397e-06	up
DDX60L	2.05945e-08	1.1737	0.000591926	up
DEDD2	2.52222e-11	1.27671	7.24937e-07	up
DENND3	1.3963e-09	1.03541	4.01323e-05	up
DHX37	1.45241e-11	1.16141	4.17452e-07	up
DIP2B	4.62478e-15	1.06267	1.32925e-10	up
DNAJB12	3.99653e-08	1.16363	0.00114868	up
DNAJC27	2.06509e-20	2.06323	5.93549e-16	up
DPP8	1.75608e-19	1.49659	5.04734e-15	up
DUSP14	6.23558e-08	1.65695	0.00179223	up
DUSP5	1.04475e-06	1.12667	0.0300281	up
DUXA	2.45563e-07	1.09191	0.00705799	up
EAF1	5.92908e-09	1.57909	0.000170414	up
EFHB	7.14362e-13	1.1712	2.05322e-08	up
EHD2	1.55292e-18	2.08624	4.46339e-14	up
EID3	2.62133e-07	1.36006	0.00753424	up
EIF1AD	1.51053e-06	1.09095	0.0434157	up
EIF5A	9.84391e-07	1.13491	0.0282934	up
ELOVL7	6.73838e-23	2.49562	1.93675e-18	up
EMC4	2.31784e-08	1.14641	0.000666194	up
EMP3	3.64554e-10	2.06121	1.0478e-05	up
ENKD1	1.40656e-16	1.80461	4.04273e-12	up
EPHB4	1.96699e-10	1.68483	5.65353e-06	up
ESYT3	2.68652e-08	1.53373	0.000772159	up
ETS2	5.42642e-33	1.54216	1.55966e-28	up
EXOC3L2	3.636e-12	1.00194	1.04506e-07	up
EXOG	3.61138e-11	1.04071	1.03798e-06	up
FADS2	2.15099e-13	1.80291	6.18237e-09	up
FAM118A	5.49812e-07	1.37655	0.0158027	up
FAM149B1	1.73665e-32	1.19138	4.99147e-28	up
FAM151A	2.59176e-08	1.06905	0.000744925	up
FAM160B1	6.55541e-10	1.17914	1.88416e-05	up
FAM161B	2.2506e-20	2.30084	6.46868e-16	up
FAM219B	8.3051e-08	1.19901	0.00238705	up
FAM83F	1.44931e-10	1.03121	4.1656e-06	up
FBLN2	4.94224e-16	1.17778	1.4205e-11	up
FBXO21	1.11672e-13	1.12705	3.20967e-09	up
FLVCR1	4.64857e-28	1.13967	1.33609e-23	up
FOXJ2	2.16519e-12	1.21156	6.22318e-08	up
FOXO4	1.07808e-06	1.1332	0.0309862	up
FOXP3	1.87086e-10	1.01781	5.37723e-06	up
FUT11	1.22145e-18	1.83873	3.51068e-14	up
GALNT1	8.84901e-13	1.23017	2.54338e-08	up
GGA1	5.89243e-11	1.32373	1.6936e-06	up
GLTP	1.20687e-17	1.02303	3.46879e-13	up
GNE	4.67472e-30	1.42122	1.34361e-25	up
GP6	8.47847e-34	1.38523	2.43688e-29	up
GPC3	1.76113e-12	1.13654	5.06184e-08	up
GPD1L	3.01321e-07	1.07318	0.00866057	up
GPSM1	3.5638e-63	1.19141	1.02431e-58	up
GRAMD1B	1.47538e-28	1.35643	4.24055e-24	up
GRK2	1.55084e-07	1.11763	0.00445742	up
GTF2A1	9.69458e-09	1.53269	0.000278642	up
HACD2	1.23816e-07	1.18615	0.00355873	up
HERC5	1.70261e-06	1.18601	0.0489363	up
HEYL	1.62368e-14	1.53468	4.66677e-10	up
HIGD1B	2.21068e-16	1.6791	6.35393e-12	up
HIRA	2.29484e-27	1.34054	6.59584e-23	up
HIST1H2AA	3.59945e-11	3.53064	1.03455e-06	up
HSD17B14	1.25091e-31	1.62549	3.59537e-27	up
HSPA4L	2.36257e-07	1.26241	0.00679049	up
HYAL1	2.40331e-10	2.17379	6.90758e-06	up
ICAM1	5.68753e-20	2.42373	1.63471e-15	up
IFNAR2	2.19601e-12	1.32807	6.31176e-08	up
IFNGR1	8.14514e-08	1.27532	0.00234108	up
IGFALS	1.84947e-08	2.12871	0.000531576	up
IKZF4	1.34057e-12	1.10652	3.85305e-08	up
IL10RB	4.52201e-07	1.1708	0.0129972	up
IL6R	9.92969e-16	2.39322	2.85399e-11	up
INPP5D	1.01326e-16	1.0707	2.9123e-12	up
INPP5J	1.7591e-11	1.45067	5.05599e-07	up
IRAK1BP1	6.70826e-29	2.21215	1.92809e-24	up
ISG20	2.67757e-26	2.57016	7.69589e-22	up
JCHAIN	9.67661e-25	1.40017	2.78125e-20	up
JMJD8	6.64729e-07	1.18866	0.0191057	up
KCNC4	5.16108e-36	1.71459	1.4834e-31	up
KIDINS220	1.58357e-07	1.03671	0.00455151	up
KIF18B	1.27982e-06	1.12076	0.0367845	up
KLC1	4.03492e-10	1.32282	1.15972e-05	up
KLHDC8B	7.23207e-10	1.4336	2.07864e-05	up
KMT5A	1.51655e-11	1.03989	4.35887e-07	up
LCAT	4.10727e-15	1.28422	1.18051e-10	up
LCTL	1.0408e-12	1.37995	2.99148e-08	up
LIMK2	9.79052e-09	1.11112	0.000281399	up
LOC100423439	3.51561e-13	1.50723	1.01046e-08	up
LOC100424132	1.8048e-10	1.00015	5.18737e-06	up
LOC100424218	1.17845e-16	1.34053	3.38709e-12	up
LOC100425370	9.80351e-21	1.86718	2.81772e-16	up
LOC100425419	5.41657e-13	1.26313	1.55683e-08	up
LOC100426562	3.38291e-33	1.55765	9.72317e-29	up
LOC100426884	7.43843e-23	2.25676	2.13795e-18	up
LOC100427218	8.36944e-31	1.24765	2.40554e-26	up
LOC100427274	1.9583e-14	2.89458	5.62855e-10	up
LOC100427472	5.58039e-13	1.07774	1.60391e-08	up
LOC100429320	1.09997e-06	1.52485	0.0316154	up
LOC100430312	1.65414e-15	1.45225	4.75433e-11	up
LOC106992662	1.90413e-55	1.85146	5.47285e-51	up
LOC106992803	1.44087e-06	1.30559	0.0414135	up
LOC106993251	1.54165e-11	1.47288	4.43101e-07	up
LOC106993502	2.10316e-86	1.62785	6.04489e-82	up
LOC106993562	1.77913e-11	1.82423	5.11356e-07	up
LOC106993618	1.4606e-10	1.13084	4.19805e-06	up
LOC106993825	1.65737e-16	1.01447	4.76361e-12	up
LOC106994025	6.76292e-09	1.1211	0.00019438	up
LOC106994133	1.26097e-07	1.92084	0.00362428	up
LOC106994139	8.365e-12	1.0349	2.40427e-07	up
LOC106994271	3.89263e-46	2.1933	1.11882e-41	up
LOC106994567	5.93317e-07	2.02769	0.0170531	up
LOC106994756	5.19664e-08	1.41991	0.00149362	up
LOC106994812	2.56764e-11	1.57963	7.37991e-07	up
LOC106994860	1.28332e-15	1.87973	3.68851e-11	up
LOC106994871	5.55115e-07	1.13738	0.0159551	up
LOC106995127	1.82365e-08	1.44167	0.000524153	up
LOC106995207	4.97686e-07	1.38984	0.0143045	up
LOC106995452	1.13158e-24	1.43599	3.25239e-20	up
LOC106995577	4.64883e-10	1.1193	1.33617e-05	up
LOC106995578	1.03041e-17	1.36926	2.96162e-13	up
LOC106995906	1.39643e-06	1.00944	0.0401361	up
LOC106996367	1.32188e-07	1.02663	0.00379934	up
LOC106996504	1.99362e-14	1.86423	5.73006e-10	up
LOC106996511	5.25352e-14	2.30934	1.50997e-09	up
LOC106996627	9.67428e-11	1.00787	2.78058e-06	up
LOC106996765	7.87211e-10	1.09646	2.2626e-05	up
LOC106996905	1.18217e-12	1.17008	3.39781e-08	up
LOC106997099	8.29574e-15	1.57108	2.38436e-10	up
LOC106997173	1.29134e-17	1.1821	3.71157e-13	up
LOC106997286	3.75234e-13	2.46718	1.0785e-08	up
LOC106997571	4.93299e-14	1.24345	1.41784e-09	up
LOC106997638	1.12482e-11	1.35376	3.23296e-07	up
LOC106998220	3.45331e-14	1.35926	9.92552e-10	up
LOC106999058	2.87932e-07	2.10102	0.00827574	up
LOC106999066	1.1978e-06	1.23119	0.034427	up
LOC106999355	1.33213e-10	1.22046	3.82882e-06	up
LOC106999775	9.3142e-11	1.00376	2.67709e-06	up
LOC107000250	7.50778e-11	1.21719	2.15789e-06	up
LOC107000406	1.87192e-13	1.38259	5.38026e-09	up
LOC107000409	3.51878e-41	2.62982	1.01137e-36	up
LOC107000724	1.68929e-13	1.6017	4.85536e-09	up
LOC107000818	4.64301e-18	1.8296	1.33449e-13	up
LOC107000925	3.08279e-10	1.82764	8.86057e-06	up
LOC114669746	3.50696e-15	1.06008	1.00797e-10	up
LOC114669790	3.01886e-07	1.87744	0.0086768	up
LOC114669812	3.66601e-26	1.70561	1.05369e-21	up
LOC114669859	2.74232e-08	1.12412	0.000788197	up
LOC114670308	1.20662e-20	2.15036	3.46806e-16	up
LOC114670544	6.58074e-16	1.82476	1.89144e-11	up
LOC114670604	1.9455e-08	1.30683	0.000559176	up
LOC114670946	3.20551e-32	2.21131	9.21328e-28	up
LOC114670950	1.7365e-30	3.34547	4.99105e-26	up
LOC114671376	3.80749e-20	1.2091	1.09435e-15	up
LOC114671540	1.25646e-10	2.17188	3.61132e-06	up
LOC114671617	2.60275e-08	3.0138	0.000748083	up
LOC114671719	7.9379e-14	1.33025	2.28151e-09	up
LOC114671902	1.76089e-25	1.45139	5.06116e-21	up
LOC114672298	3.29333e-08	1.48418	0.000946569	up
LOC114672304	1.53154e-22	2.00608	4.40196e-18	up
LOC114672305	2.91844e-11	2.12046	8.38819e-07	up
LOC114672361	2.2099e-20	1.0914	6.35169e-16	up
LOC114672432	8.40384e-43	1.61568	2.41543e-38	up
LOC114672450	3.67744e-10	1.29494	1.05697e-05	up
LOC114672510	2.78663e-61	2.60039	8.00932e-57	up
LOC114672530	1.428e-06	3.55356	0.0410435	up
LOC114672987	1.36706e-08	1.09178	0.00039292	up
LOC114673115	1.21829e-15	1.20904	3.50162e-11	up
LOC114673117	2.23754e-08	2.64245	0.000643115	up
LOC114673201	5.97158e-09	1.18604	0.000171635	up
LOC114673210	1.18508e-13	1.47512	3.40617e-09	up
LOC114673462	3.59818e-09	1.08935	0.000103419	up
LOC114673543	1.33372e-11	1.51806	3.83339e-07	up
LOC114673681	2.65355e-16	1.12161	7.62682e-12	up
LOC114673716	3.41046e-08	1.07194	0.000980234	up
LOC114673741	6.50241e-14	1.76799	1.86892e-09	up
LOC114673840	1.38058e-09	1.05434	3.96806e-05	up
LOC114674094	4.82881e-15	1.19112	1.3879e-10	up
LOC114674437	4.24215e-10	1.62193	1.21928e-05	up
LOC114674662	1.8691e-09	1.11269	5.37215e-05	up
LOC114674748	8.76453e-12	2.54589	2.5191e-07	up
LOC114674996	5.75311e-07	2.13919	0.0165356	up
LOC114675033	1.58592e-10	1.16214	4.55825e-06	up
LOC114675588	8.82448e-16	1.08728	2.53633e-11	up
LOC114675652	3.38013e-14	1.04933	9.71517e-10	up
LOC114675718	7.41927e-43	2.09445	2.13245e-38	up
LOC114675844	5.13984e-08	1.66236	0.00147729	up
LOC114675890	4.63112e-09	1.24752	0.000133108	up
LOC114675944	1.99239e-09	1.26621	5.72653e-05	up
LOC114675997	4.34693e-09	2.54811	0.000124939	up
LOC114676071	1.46506e-12	1.81947	4.21087e-08	up
LOC114676191	3.24245e-13	1.61139	9.31944e-09	up
LOC114676217	1.935e-10	2.86584	5.56159e-06	up
LOC114676381	7.02604e-19	2.43582	2.01942e-14	up
LOC114676390	8.44001e-31	2.85652	2.42583e-26	up
LOC114676685	1.91964e-07	1.42958	0.00551744	up
LOC114677401	2.6136e-54	1.60799	7.51202e-50	up
LOC114677576	2.85974e-08	1.13895	0.000821947	up
LOC114678206	1.41243e-07	1.02555	0.0040596	up
LOC114678594	3.19661e-19	1.11331	9.1877e-15	up
LOC114678708	5.50762e-24	1.19643	1.583e-19	up
LOC114678757	2.50713e-14	1.62314	7.20598e-10	up
LOC114678848	1.01908e-09	1.40575	2.92904e-05	up
LOC114679012	1.12658e-10	1.34879	3.23801e-06	up
LOC114679149	9.49889e-20	1.95574	2.73017e-15	up
LOC114679273	1.03941e-08	1.2518	0.000298746	up
LOC114679320	1.99955e-11	1.32402	5.74712e-07	up
LOC114679457	7.98745e-26	1.4922	2.29575e-21	up
LOC114679573	3.23161e-18	1.71135	9.2883e-14	up
LOC114679705	1.16735e-07	1.23159	0.0033552	up
LOC114679734	2.38752e-12	1.40394	6.86222e-08	up
LOC114680147	2.1955e-09	1.25782	6.3103e-05	up
LOC114680207	1.81923e-15	1.7214	5.22884e-11	up
LOC114680232	3.77533e-27	1.29596	1.0851e-22	up
LOC114680244	2.98939e-20	1.97719	8.59211e-16	up
LOC693939	1.55258e-17	1.02248	4.46242e-13	up
LOC694111	1.17548e-10	1.75887	3.37855e-06	up
LOC694255	1.45041e-19	1.56586	4.16877e-15	up
LOC695427	5.73319e-08	1.6874	0.00164783	up
LOC696118	4.50228e-53	3.08942	1.29405e-48	up
LOC696321	7.48452e-10	2.51619	2.1512e-05	up
LOC696457	2.6482e-07	1.55348	0.00761147	up
LOC698255	7.20045e-09	1.12274	0.000206955	up
LOC699779	2.96428e-16	1.88554	8.51994e-12	up
LOC700862	1.01914e-22	1.17741	2.9292e-18	up
LOC702367	1.42846e-40	1.05328	4.10567e-36	up
LOC702760	3.49562e-11	1.25891	1.00471e-06	up
LOC702762	8.53885e-12	1.10344	2.45424e-07	up
LOC703297	2.96363e-20	2.44332	8.51806e-16	up
LOC704147	5.10137e-07	1.21582	0.0146624	up
LOC704245	3.6403e-09	1.56977	0.000104629	up
LOC704510	1.67045e-38	2.58669	4.80119e-34	up
LOC704931	7.6914e-21	2.06449	2.21066e-16	up
LOC704978	5.11106e-14	1.33088	1.46902e-09	up
LOC705198	1.93226e-12	1.42154	5.55371e-08	up
LOC705754	2.51847e-47	1.75676	7.23858e-43	up
LOC705933	3.69514e-09	1.22379	0.000106206	up
LOC706712	1.21338e-65	1.08294	3.4875e-61	up
LOC707602	7.23514e-17	2.427	2.07952e-12	up
LOC708582	1.72354e-06	1.38306	0.0495379	up
LOC708759	8.1061e-07	1.05165	0.0232985	up
LOC709251	5.51301e-28	1.7461	1.58455e-23	up
LOC709270	1.0269e-07	1.47224	0.00295152	up
LOC709587	3.47867e-18	1.20944	9.99838e-14	up
LOC710533	6.18884e-19	1.81448	1.7788e-14	up
LOC710876	3.34834e-56	1.3725	9.6238e-52	up
LOC711544	1.48146e-06	1.36908	0.0425802	up
LOC711872	1.92661e-118	4.33144	5.53745e-114	up
LOC712630	3.38162e-35	2.129	9.71946e-31	up
LOC712998	8.1044e-27	1.09682	2.32937e-22	up
LOC713514	8.8177e-20	1.08376	2.53438e-15	up
LOC713596	1.28616e-13	1.49481	3.69667e-09	up
LOC715795	1.78212e-16	1.70778	5.12217e-12	up
LOC716081	4.46668e-09	1.56039	0.000128381	up
LOC716510	1.80571e-09	1.93311	5.18998e-05	up
LOC717030	4.54566e-11	1.04371	1.30651e-06	up
LOC718486	1.09037e-07	1.41139	0.00313394	up
LOC718510	4.4538e-37	2.67791	1.28011e-32	up
LOC718576	9.75347e-43	2.10449	2.80334e-38	up
LOC719232	4.93215e-10	1.62537	1.4176e-05	up
LOC719951	7.31166e-11	1.28657	2.10152e-06	up
LOC720465	5.54102e-18	1.35688	1.5926e-13	up
LOC720717	8.84794e-09	2.81493	0.000254307	up
LOC721152	3.85766e-13	1.36785	1.10877e-08	up
LOC721591	9.30074e-17	1.89707	2.67322e-12	up
LRCH4	1.13658e-15	1.61468	3.26677e-11	up
LRRC57	1.57547e-08	1.11766	0.000452822	up
LRRC75A	2.53382e-14	1.43809	7.28271e-10	up
LRRC8B	4.18738e-16	1.26335	1.20354e-11	up
LSM11	1.37408e-23	2.07708	3.94938e-19	up
LYSMD1	1.89679e-09	1.13412	5.45177e-05	up
MAP1S	7.33811e-11	1.31231	2.10912e-06	up
MAP3K12	9.16312e-19	1.73222	2.63366e-14	up
MAP9	9.13779e-13	1.25384	2.62638e-08	up
MASP2	1.99178e-17	1.11488	5.72478e-13	up
MAST3	1.97504e-09	1.3235	5.67665e-05	up
MED25	1.74308e-22	1.53319	5.00995e-18	up
MED9	3.92688e-08	1.361	0.00112866	up
MGAT2	1.24015e-07	1.068	0.00356444	up
MICAL3	9.07401e-10	1.28257	2.60805e-05	up
MIER2	1.80047e-07	1.08395	0.00517492	up
MILR1	1.9617e-28	1.55983	5.63832e-24	up
MLLT1	2.04919e-26	1.29203	5.88978e-22	up
MOK	2.68276e-14	1.55886	7.71079e-10	up
MON1A	4.96736e-08	1.18604	0.00142772	up
MON2	4.38365e-10	1.20311	1.25995e-05	up
MORC4	5.03784e-15	1.12243	1.44798e-10	up
MRGBP	3.1076e-11	1.53882	8.93187e-07	up
MSANTD4	5.22899e-11	1.63032	1.50292e-06	up
MSI1	1.90934e-15	1.58409	5.48784e-11	up
MSL1	8.61515e-11	1.12064	2.47617e-06	up
MYCN	2.16694e-11	1.00795	6.22821e-07	up
NEURL1	3.32166e-07	1.1281	0.00954711	up
NIPSNAP1	1.03679e-06	1.12806	0.0297995	up
NMRK2	7.44521e-32	2.60803	2.1399e-27	up
NR1D2	6.40847e-15	1.03143	1.84192e-10	up
NR2F6	9.70831e-13	1.37715	2.79036e-08	up
NTM	8.96715e-23	2.06274	2.57734e-18	up
NUPR2	8.84561e-14	1.34263	2.54241e-09	up
PCSK7	3.96074e-12	1.01759	1.1384e-07	up
PEA15	1.29251e-06	1.01366	0.0371494	up
PEBP4	1.4062e-17	1.00562	4.04169e-13	up
PFKFB3	3.41963e-17	1.68964	9.8287e-13	up
PHYKPL	1.21479e-11	1.10251	3.49156e-07	up
PID1	6.49998e-25	1.19284	1.86822e-20	up
PIM1	5.22617e-28	2.21684	1.50211e-23	up
PKN3	9.5022e-09	1.10344	0.000273112	up
PLAG1	1.05582e-10	1.40031	3.03465e-06	up
PLIN5	7.48817e-12	1.59938	2.15225e-07	up
PLVAP	5.76154e-18	2.27015	1.65598e-13	up
POFUT2	1.08989e-06	1.25839	0.0313257	up
PPIL4	5.4031e-10	1.41805	1.55296e-05	up
PPM1E	8.16614e-13	1.02613	2.34711e-08	up
PPP1R14D	1.02992e-25	1.86013	2.96019e-21	up
PRKCZ	3.491e-10	1.05253	1.00338e-05	up
PROSER2	8.5365e-19	1.21557	2.45356e-14	up
PRPF39	1.87926e-08	1.43491	0.000540136	up
PRSS50	3.0999e-07	1.48194	0.00890973	up
PSAT1	1.31997e-12	2.22118	3.79385e-08	up
PSME2	3.04821e-13	2.31464	8.76117e-09	up
PTGES3L	6.85444e-21	1.55386	1.9701e-16	up
PTPN23	7.23081e-30	1.63008	2.07828e-25	up
PTPRJ	6.95804e-16	1.24871	1.99988e-11	up
PYGO1	1.73452e-14	1.17213	4.98534e-10	up
QTRT1	2.1872e-23	2.01286	6.28645e-19	up
RAB38	4.3681e-09	1.07025	0.000125548	up
RAB42	5.51696e-11	1.644	1.58568e-06	up
RAI14	1.06717e-08	1.10861	0.000306727	up
RAP1GDS1	3.70341e-08	1.08708	0.00106443	up
RAPGEFL1	2.54719e-14	1.11696	7.32114e-10	up
RBM23	7.87433e-08	1.18457	0.00226324	up
RETREG3	9.14735e-10	1.27719	2.62913e-05	up
REX1BD	6.91693e-08	1.2093	0.00198807	up
RFK	1.63978e-08	1.25234	0.000471306	up
RHOD	1.0026e-15	1.06035	2.88169e-11	up
RHOF	1.51286e-12	1.10455	4.34826e-08	up
RIBC2	3.39682e-31	1.72737	9.76313e-27	up
RNASE9	1.45203e-07	1.79932	0.00417342	up
RNF122	1.34517e-06	1.49148	0.0386629	up
RNF168	1.81586e-18	1.90712	5.21916e-14	up
ROCK2	1.37771e-22	1.65002	3.95982e-18	up
RPGRIP1	3.12136e-14	1.09595	8.9714e-10	up
RPRD1B	3.98448e-10	1.11484	1.14522e-05	up
RPS19BP1	9.31176e-07	1.04426	0.0267639	up
RRAGB	2.17247e-17	1.79931	6.2441e-13	up
RRAS	8.85177e-08	1.07804	0.00254418	up
RYR3	3.07393e-32	1.24595	8.8351e-28	up
SALL4	4.89912e-07	1.19114	0.0140811	up
SCN1B	1.80373e-08	1.18744	0.000518428	up
SDHAF1	7.08461e-11	1.55458	2.03626e-06	up
SERPINB8	5.34019e-17	1.37037	1.53488e-12	up
SERPINF1	1.0725e-08	1.60438	0.000308259	up
SESN1	9.98547e-11	1.51375	2.87002e-06	up
SESN2	4.50248e-08	1.35003	0.0012941	up
SET	1.23804e-07	1.33599	0.00355837	up
SF3A2	2.91837e-07	1.16139	0.00838799	up
SFSWAP	5.21604e-08	1.31766	0.00149919	up
SH2D3C	1.33102e-19	1.73301	3.82561e-15	up
SHD	1.37251e-19	1.48424	3.94486e-15	up
SIGLECL1	1.02009e-07	1.09125	0.00293196	up
SLC17A7	1.30183e-09	1.60963	3.74172e-05	up
SLC1A5	4.23693e-11	1.77489	1.21778e-06	up
SLC20A2	7.05498e-14	1.20934	2.02774e-09	up
SLC25A25	1.12653e-27	1.49475	3.23788e-23	up
SLC26A2	2.60932e-31	1.97679	7.49971e-27	up
SLC2A8	1.60044e-08	1.28116	0.000459999	up
SLC35E4	2.94612e-12	1.70394	8.46774e-08	up
SLC35F2	9.24293e-10	1.35027	2.6566e-05	up
SLC35F5	2.75894e-07	1.05545	0.00792975	up
SLC43A1	6.23242e-29	1.46015	1.79132e-24	up
SLC52A1	1.57023e-10	1.66636	4.51316e-06	up
SLC6A13	2.59091e-15	1.20179	7.44681e-11	up
SLC7A6	7.68755e-10	1.15271	2.20956e-05	up
SLC7A9	5.82913e-58	2.63937	1.67541e-53	up
SLC9A6	1.58149e-20	1.66268	4.54553e-16	up
SLC9B1	1.25541e-123	3.1261	3.60829e-119	up
SLX1A	1.54978e-11	1.34989	4.45438e-07	up
SMOC1	2.97794e-12	1.36054	8.55919e-08	up
SOCS2	1.10564e-13	1.86193	3.17783e-09	up
SOCS4	2.22514e-09	1.30319	6.39549e-05	up
SP3	1.69311e-11	1.15062	4.86633e-07	up
SP4	8.28081e-14	1.11643	2.38007e-09	up
SPOPL	1.40374e-10	1.29226	4.03462e-06	up
SPRED2	9.98021e-10	1.03275	2.86851e-05	up
ST3GAL2	1.56016e-17	1.25058	4.4842e-13	up
ST6GALNAC2	7.07784e-16	1.86241	2.03431e-11	up
ST6GALNAC6	7.01732e-14	1.33621	2.01692e-09	up
SULT1A3	1.07836e-09	1.49761	3.09943e-05	up
SUPT5H	2.90321e-08	1.0164	0.00083444	up
SYNC	4.0973e-13	1.32515	1.17765e-08	up
SYTL3	1.73551e-07	1.0276	0.00498821	up
TAF7L	2.80464e-11	1.2114	8.0611e-07	up
TCP11L1	7.24034e-08	1.07168	0.00208102	up
TEAD2	3.21551e-20	1.31949	9.24201e-16	up
TESK2	2.39805e-14	1.22817	6.89246e-10	up
TGFB3	2.15195e-16	2.33715	6.18512e-12	up
TIGD6	1.00106e-11	1.21596	2.87724e-07	up
TIGD7	8.4898e-14	1.32766	2.44014e-09	up
TLE3	1.2248e-08	1.04136	0.000352032	up
TM6SF2	1.56275e-07	1.03102	0.00449164	up
TMEM131	2.1323e-21	1.07657	6.12866e-17	up
TMEM254	9.03885e-11	1.57626	2.59795e-06	up
TMEM39B	1.61246e-08	1.14018	0.000463453	up
TMEM63A	1.08043e-54	2.56895	3.10538e-50	up
TMEM81	3.12426e-07	1.38217	0.00897976	up
TMPPE	3.41062e-13	2.4083	9.80279e-09	up
TOR1B	5.93697e-12	1.32363	1.7064e-07	up
TP53	1.0648e-13	1.15754	3.06045e-09	up
TP53RK	5.00916e-07	1.056	0.0143973	up
TRA2A	6.91483e-07	1.07729	0.0198746	up
TRAIP	5.59702e-13	1.40019	1.6087e-08	up
TRIB3	5.1525e-13	1.43491	1.48093e-08	up
TRPV6	4.73958e-17	2.26159	1.36225e-12	up
TTC26	9.9121e-09	1.16947	0.000284893	up
TTLL1	1.32311e-07	1.37386	0.00380287	up
TTLL3	1.63696e-09	1.1344	4.70496e-05	up
TTYH2	4.21587e-17	1.20666	1.21173e-12	up
TWNK	9.27112e-09	1.08366	0.00026647	up
UBE2M	2.86018e-14	1.5144	8.22074e-10	up
UBN1	1.30981e-12	1.12198	3.76467e-08	up
UBP1	1.80622e-10	1.16321	5.19144e-06	up
UEVLD	1.29374e-12	1.35054	3.71848e-08	up
UFSP1	1.93104e-10	1.2764	5.55018e-06	up
UNC93A	1.23445e-23	1.57741	3.54806e-19	up
USP54	1.132e-09	1.06362	3.25359e-05	up
VAT1	3.91919e-09	1.19093	0.000112645	up
VENTX	1.30301e-06	1.42807	0.0374511	up
VHL	2.24408e-09	1.24639	6.44993e-05	up
VSIG10	6.67014e-16	1.73229	1.91713e-11	up
WDFY2	2.06724e-30	1.40841	5.94166e-26	up
WHAMM	2.27016e-25	1.45476	6.52489e-21	up
XYLT1	4.40137e-23	1.45621	1.26504e-18	up
YPEL2	1.65363e-10	1.05261	4.75286e-06	up
YRDC	3.39215e-09	1.61895	9.74971e-05	up
ZBTB34	1.68114e-12	1.07037	4.83193e-08	up
ZC3H18	6.41951e-14	1.10229	1.8451e-09	up
ZC3HAV1	9.158e-07	1.52238	0.0263219	up
ZFY	1.52949e-08	1.17207	0.000439606	up
ZG16	2.59542e-10	1.46061	7.45975e-06	up
ZMAT3	1.30608e-11	1.55328	3.75393e-07	up
ZNF157	1.06891e-06	1.52065	0.0307225	up
ZNF175	7.24328e-11	1.87008	2.08186e-06	up
ZNF200	1.37218e-07	1.31126	0.00394392	up
ZNF221	1.87402e-11	1.28758	5.3863e-07	up
ZNF23	3.13886e-10	1.34122	9.02171e-06	up
ZNF286A	1.35443e-08	1.32768	0.000389291	up
ZNF287	2.90228e-17	2.17755	8.34173e-13	up
ZNF382	2.19729e-09	1.04015	6.31545e-05	up
ZNF433	1.03253e-17	1.73192	2.96769e-13	up
ZNF512	4.56759e-07	1.11793	0.0131282	up
ZNF529	8.69598e-08	1.11224	0.0024994	up
ZNF543	9.70641e-10	1.17808	2.78982e-05	up
ZNF549	2.2069e-09	1.2975	6.34308e-05	up
ZNF589	3.48331e-13	1.96287	1.00117e-08	up
ZNF608	5.58673e-07	1.18745	0.0160574	up
ZNF609	1.05408e-13	1.15256	3.02963e-09	up
ZNF644	2.58859e-24	1.33337	7.44012e-20	up
ZNF671	1.70554e-06	1.31681	0.0490206	up
ZNF674	1.11598e-09	1.38039	3.20755e-05	up
ZNF696	1.28658e-14	1.25453	3.69788e-10	up
ZNF699	1.11492e-15	1.22197	3.20449e-11	up
ZNF827	3.85462e-20	1.3974	1.10789e-15	up
ZNF891	6.13078e-11	1.10135	1.76211e-06	up
ZWILCH	8.42649e-14	1.44085	2.42194e-09	up
ABI3BP	1.07343e-12	-1.91614	3.08526e-08	down
ABO	1.22008e-09	-1.19938	3.50674e-05	down
ACRV1	5.38042e-12	-1.06624	1.54644e-07	down
ACTN2	5.04286e-12	-1.40274	1.44942e-07	down
ACTR3B	5.81129e-36	-1.76154	1.67028e-31	down
ADA	6.56982e-10	-2.07959	1.8883e-05	down
ADAMTSL2	8.6259e-27	-1.50353	2.47926e-22	down
ADGRA3	1.68723e-12	-1.61797	4.84944e-08	down
ADGRG6	1.46939e-18	-1.31831	4.22331e-14	down
ADGRG7	2.1558e-08	-1.36593	0.000619619	down
AFF2	1.31945e-14	-1.5132	3.79237e-10	down
AGBL5	2.22331e-29	-1.33739	6.39025e-25	down
AHNAK	2.48085e-16	-1.28055	7.13045e-12	down
AKAP6	8.26835e-20	-1.31733	2.37649e-15	down
ALOX5AP	8.07644e-11	-1.78723	2.32133e-06	down
ALOXE3	2.34877e-23	-1.53172	6.75084e-19	down
ANK3	4.03793e-22	-1.10782	1.16058e-17	down
ANXA2	6.75356e-27	-3.7889	1.94111e-22	down
ANXA3	1.16909e-29	-2.271	3.3602e-25	down
APOC4	2.23922e-12	-1.58509	6.43596e-08	down
ARHGAP10	4.41563e-08	-1.17303	0.00126914	down
ARHGEF12	2.596e-43	-1.20112	7.46143e-39	down
ARMC2	5.6765e-07	-1.72788	0.0163154	down
ARMC9	4.84478e-07	-1.17398	0.0139249	down
ARSE	5.85941e-08	-1.10786	0.00168411	down
ARSH	5.20451e-14	-2.15527	1.49588e-09	down
ARSK	6.03528e-11	-1.24943	1.73466e-06	down
ASPA	8.44759e-110	-1.60284	2.42801e-105	down
ASS1	1.1201e-15	-1.07627	3.2194e-11	down
ASZ1	1.60128e-88	-2.10375	4.60239e-84	down
ATP1A3	1.79266e-15	-1.23609	5.15247e-11	down
ATP6V0A4	1.2393e-08	-1.68737	0.000356201	down
ATP6V0D2	6.59559e-31	-2.96804	1.8957e-26	down
ATP6V1B1	8.81458e-12	-1.97596	2.53349e-07	down
ATP8B4	1.33656e-10	-1.22411	3.84155e-06	down
B3GNT3	1.04203e-06	-1.99402	0.02995	down
B3GNTL1	1.29845e-08	-1.43982	0.000373201	down
BACH2	3.97062e-23	-1.37008	1.14124e-18	down
BAIAP2L2	9.04379e-08	-1.04149	0.00259937	down
BATF	2.07357e-30	-2.29082	5.95984e-26	down
BBS2	7.2969e-17	-2.08679	2.09728e-12	down
BCAS4	1.99676e-07	-1.06212	0.00573908	down
BCAT2	7.49547e-11	-1.19192	2.15435e-06	down
BHLHB9	3.03092e-07	-1.20468	0.00871147	down
BHLHE40	1.32226e-06	-2.52113	0.0380045	down
BMP4	1.65215e-39	-3.42372	4.7486e-35	down
BMP5	2.08398e-16	-1.42937	5.98978e-12	down
BMPR1A	1.72482e-22	-1.91076	4.95749e-18	down
BNC1	2.06395e-19	-1.46783	5.93222e-15	down
BORCS5	2.68946e-07	-1.55679	0.00773004	down
BTBD11	6.08226e-10	-2.15753	1.74816e-05	down
C11H12orf66	2.9297e-07	-1.25869	0.00842055	down
C12H2orf80	3.46251e-57	-1.62739	9.95193e-53	down
C12H2orf88	2.55243e-17	-1.71462	7.33619e-13	down
C13H2orf15	3.95083e-26	-1.64341	1.13555e-21	down
C19H19orf57	8.7426e-27	-1.27878	2.5128e-22	down
C1H1orf21	1.44573e-124	-2.06931	4.15532e-120	down
C1H1orf74	3.96122e-07	-1.1836	0.0113853	down
C3H7orf25	2.37703e-09	-1.36337	6.83205e-05	down
C5H4orf47	2.02247e-54	-2.28275	5.81297e-50	down
C9H10orf82	1.7314e-06	-2.27679	0.0497638	down
C9H10orf99	3.72092e-11	-1.05768	1.06947e-06	down
CACNG7	3.04179e-12	-1.20126	8.74272e-08	down
CACUL1	7.05664e-12	-1.39999	2.02822e-07	down
CAMK1	9.77679e-37	-1.38483	2.81004e-32	down
CAPN1	1.95567e-09	-1.25068	5.62098e-05	down
CAPN14	9.3145e-34	-1.56312	2.67717e-29	down
CAPN5	2.00834e-07	-1.13725	0.00577238	down
CASTOR2	1.38443e-22	-1.14991	3.97911e-18	down
CAV1	1.31692e-24	-1.94757	3.78508e-20	down
CCDC63	2.72495e-54	-1.47584	7.83204e-50	down
CCDC92	5.63679e-22	-1.78596	1.62013e-17	down
CCKBR	2.01441e-09	-1.57245	5.78983e-05	down
CCN6	1.49313e-33	-2.34318	4.29157e-29	down
CCNY	5.60966e-28	-1.05327	1.61233e-23	down
CCP110	5.83427e-07	-1.00464	0.0167689	down
CD226	6.03492e-16	-2.36046	1.73456e-11	down
CD247	4.10965e-46	-2.95977	1.1812e-41	down
CD38	3.68912e-08	-1.49059	0.00106033	down
CD52	3.28704e-07	-1.48261	0.0094476	down
CD55	2.84233e-16	-2.40595	8.16943e-12	down
CD86	3.10561e-83	-1.59329	8.92614e-79	down
CD8B	5.16445e-20	-1.7849	1.48437e-15	down
CD99	5.37236e-23	-2.12682	1.54412e-18	down
CDYL	1.19206e-08	-1.14666	0.000342623	down
CELSR1	7.04397e-08	-1.13196	0.00202458	down
CETN2	3.5327e-09	-1.49617	0.000101537	down
CFAP77	4.44018e-18	-1.17795	1.2762e-13	down
CHCHD3	8.16542e-07	-1.02894	0.023469	down
CIDEC	2.16954e-16	-2.2604	6.2357e-12	down
CKMT2	6.96971e-52	-2.08831	2.00323e-47	down
CLDN10	6.10376e-08	-1.31712	0.00175434	down
CLEC17A	9.47611e-17	-2.8515	2.72362e-12	down
CLUAP1	2.45845e-10	-1.12157	7.06607e-06	down
CMTM4	6.87036e-18	-1.39974	1.97468e-13	down
CNBD1	2.012e-63	-2.23484	5.78289e-59	down
CNDP1	1.30004e-26	-2.56588	3.73656e-22	down
CNIH3	6.14165e-109	-1.85437	1.76523e-104	down
CNRIP1	8.88777e-08	-2.03721	0.00255452	down
CNTN1	1.78907e-10	-1.79011	5.14215e-06	down
CNTN5	1.65643e-19	-1.66018	4.76091e-15	down
CPNE4	4.26549e-24	-1.76	1.22599e-19	down
CPPED1	5.51318e-10	-1.09098	1.5846e-05	down
CPT1A	1.41188e-43	-1.41316	4.05803e-39	down
CRELD1	5.97887e-07	-1.93709	0.0171845	down
CRIP1	5.58624e-09	-2.27951	0.00016056	down
CRLS1	8.80181e-09	-1.33134	0.000252982	down
CRYBB2	6.86305e-15	-1.75867	1.97258e-10	down
CRYL1	6.09265e-07	-1.0599	0.0175115	down
CSDC2	7.57011e-26	-2.01037	2.1758e-21	down
CTNNA2	1.16397e-17	-1.91642	3.34547e-13	down
CXCR2	3.15866e-21	-1.04379	9.07861e-17	down
CYB5RL	8.33757e-11	-1.26919	2.39638e-06	down
CYP2C93	3.36629e-14	-2.59532	9.67539e-10	down
CYP2F1	6.53601e-10	-1.5412	1.87858e-05	down
CYP2R1	7.73883e-14	-2.99374	2.22429e-09	down
CYP39A1	2.30416e-17	-2.02954	6.62261e-13	down
CYTIP	1.51613e-42	-2.497	4.35767e-38	down
DAND5	7.6349e-24	-1.82722	2.19442e-19	down
DBT	6.59765e-16	-1.47828	1.8963e-11	down
DCDC2C	1.46136e-19	-1.1537	4.20024e-15	down
DCLK2	7.94769e-11	-2.17869	2.28433e-06	down
DCT	3.24848e-59	-1.53064	9.33678e-55	down
DDR1	2.32064e-17	-1.62576	6.66999e-13	down
DGKI	3.90586e-38	-1.54154	1.12262e-33	down
DNAAF1	2.39992e-24	-1.31427	6.89784e-20	down
DNAH7	4.85484e-33	-1.08491	1.39538e-28	down
DNAJA4	1.06183e-08	-1.60277	0.000305192	down
DNAJC3	6.26056e-08	-1.1059	0.00179941	down
DNASE1	8.05505e-41	-1.78448	2.31518e-36	down
DOCK4	1.03583e-06	-1.11114	0.0297717	down
DOK5	4.96128e-08	-2.10273	0.00142597	down
DOK6	1.0056e-46	-1.31992	2.89029e-42	down
DPP3	4.27537e-10	-1.61172	1.22883e-05	down
DPP6	2.6735e-10	-1.50013	7.68417e-06	down
DPYSL2	4.32501e-10	-1.0893	1.24309e-05	down
DSCAML1	1.56385e-13	-1.20261	4.49481e-09	down
DTNA	6.9257e-14	-2.03905	1.99058e-09	down
DYNLT3	7.49295e-10	-1.84123	2.15362e-05	down
EBF2	4.68931e-12	-1.81742	1.3478e-07	down
EFCAB2	5.2937e-10	-1.14775	1.52152e-05	down
EFHC2	2.69851e-106	-1.7898	7.75606e-102	down
EFHD1	3.01095e-13	-1.74143	8.65407e-09	down
EGR2	1.48218e-15	-2.6433	4.26009e-11	down
EID1	1.49535e-06	-1.4831	0.0429792	down
EIF2A	1.48242e-06	-1.22321	0.0426078	down
EIF4E3	2.54632e-41	-1.57956	7.31862e-37	down
ELOVL2	1.51908e-19	-1.6852	4.36613e-15	down
ENPP5	5.03045e-10	-2.31548	1.44585e-05	down
EPHA4	1.72322e-13	-1.0227	4.95288e-09	down
ERC2	1.47661e-38	-1.36106	4.24408e-34	down
ERGIC1	4.41948e-20	-1.54751	1.27025e-15	down
ESRRG	2.52048e-24	-1.70439	7.24435e-20	down
EXOC4	1.20571e-12	-1.42654	3.46547e-08	down
EYA2	5.75262e-08	-1.34643	0.00165342	down
F2	2.82653e-43	-2.63113	8.12402e-39	down
FAM167B	7.59494e-07	-1.95613	0.0218294	down
FAM174A	1.13856e-08	-1.42102	0.000327244	down
FAM53A	1.98554e-07	-1.58351	0.00570684	down
FAM81A	1.07696e-17	-2.64485	3.09541e-13	down
FAM92A	1.28491e-08	-1.69424	0.00036931	down
FANK1	4.9722e-09	-2.06932	0.000142911	down
FBLN7	2.34772e-19	-1.88795	6.74782e-15	down
FBXL7	7.01621e-17	-1.1313	2.0166e-12	down
FBXO15	1.56977e-08	-1.47302	0.000451183	down
FER	1.17953e-16	-1.44935	3.39019e-12	down
FGF19	7.75663e-19	-2.67255	2.22941e-14	down
FHIT	4.2378e-12	-1.89906	1.21803e-07	down
FKBP9	2.42625e-07	-1.21292	0.00697353	down
FLNB	2.53797e-11	-1.4529	7.29462e-07	down
FNDC11	7.37375e-08	-2.30147	0.00211936	down
FPGT	1.27663e-12	-1.54233	3.6693e-08	down
FRMD3	1.42476e-25	-1.78522	4.09506e-21	down
FSIP1	2.85938e-12	-1.08475	8.21842e-08	down
FSTL4	3.29083e-45	-1.47349	9.4585e-41	down
FTH1	5.96513e-10	-1.80943	1.7145e-05	down
GAL3ST1	3.57806e-16	-1.20849	1.02841e-11	down
GALC	2.43621e-21	-1.03697	7.00216e-17	down
GALK1	3.24139e-10	-1.69575	9.3164e-06	down
GCNT3	1.16633e-07	-2.01095	0.00335227	down
GCSAML	1.51627e-13	-1.17646	4.35805e-09	down
GDE1	1.89505e-09	-1.42382	5.44674e-05	down
GFRA2	1.63052e-127	-1.29806	4.68644e-123	down
GLS2	7.80775e-48	-2.27307	2.2441e-43	down
GLT8D2	4.15896e-88	-1.58549	1.19537e-83	down
GNA13	7.81724e-10	-1.29607	2.24683e-05	down
GPC5	1.41664e-18	-2.32121	4.07171e-14	down
GPC6	3.37137e-12	-1.60134	9.69e-08	down
GPM6B	1.28164e-38	-1.81547	3.6837e-34	down
GPNMB	1.01755e-62	-1.51435	2.92463e-58	down
GPR119	8.52885e-07	-1.33071	0.0245136	down
GPR137B	3.59717e-42	-1.96641	1.0339e-37	down
GPR160	1.18454e-07	-2.09103	0.00340462	down
GPRC5A	1.75342e-07	-1.14446	0.00503967	down
GRHL2	4.46034e-48	-2.01104	1.28199e-43	down
GRM4	1.50729e-24	-1.44606	4.33225e-20	down
GSDME	4.59448e-09	-1.40117	0.000132055	down
GSR	3.03388e-08	-1.69706	0.000871999	down
GTDC1	4.24985e-11	-1.30707	1.22149e-06	down
H2AFY2	3.67154e-41	-2.88481	1.05527e-36	down
HABP4	7.55383e-10	-1.21869	2.17112e-05	down
HAGH	2.06226e-16	-2.09647	5.92735e-12	down
HAS2	1.34038e-12	-2.6408	3.85251e-08	down
HCRTR2	2.222e-17	-2.07277	6.38648e-13	down
HECTD2	8.07576e-42	-1.42335	2.32114e-37	down
HSF2BP	6.86292e-08	-1.44752	0.00197254	down
HSP90B1	7.67275e-07	-1.87659	0.022053	down
HSPBAP1	4.03441e-14	-1.18629	1.15957e-09	down
HTATIP2	3.23449e-07	-2.25353	0.00929658	down
ICA1L	1.79218e-23	-1.63635	5.15108e-19	down
ID2	4.34566e-08	-1.4065	0.00124903	down
IFT52	3.4679e-09	-1.42251	9.96744e-05	down
IFT57	1.5514e-08	-1.09923	0.000445902	down
IL16	8.158e-53	-2.75963	2.34477e-48	down
IL34	2.79143e-16	-1.90499	8.02313e-12	down
INCA1	3.57098e-08	-1.82561	0.00102637	down
INPP5F	8.95334e-17	-1.55755	2.57337e-12	down
INTS10	2.53777e-09	-1.50632	7.29407e-05	down
IRF8	4.53416e-07	-1.3805	0.0130321	down
ITGBL1	1.27573e-22	-1.74086	3.6667e-18	down
ITPRID2	3.81827e-19	-1.93896	1.09745e-14	down
KALRN	1.47627e-11	-2.32345	4.24308e-07	down
KANK1	7.07292e-26	-2.0826	2.0329e-21	down
KCNA2	4.68086e-12	-1.83364	1.34537e-07	down
KCNC2	1.10871e-17	-1.37727	3.18666e-13	down
KCND3	1.23102e-29	-1.43076	3.53821e-25	down
KCNJ15	1.89553e-23	-1.18566	5.44812e-19	down
KCNJ6	1.04686e-25	-2.25822	3.00889e-21	down
KCNK9	4.07015e-07	-1.75935	0.0116984	down
KCTD13	5.26389e-10	-1.67487	1.51295e-05	down
KHDRBS3	2.35935e-25	-1.59564	6.78124e-21	down
KIAA1549L	1.76362e-21	-1.32804	5.069e-17	down
KIAA1958	2.03883e-19	-1.05832	5.86e-15	down
KIF26B	2.79291e-50	-1.32068	8.02738e-46	down
KIF27	2.54583e-10	-1.05029	7.31723e-06	down
KLK15	3.08662e-07	-2.09716	0.00887158	down
KLK4	7.98327e-09	-1.06127	0.000229455	down
KRT18	1.73304e-06	-1.84147	0.0498111	down
KRT8	5.14617e-26	-3.92405	1.47911e-21	down
L3MBTL3	1.85556e-18	-1.16769	5.33324e-14	down
LAGE3	1.36489e-08	-1.71048	0.000392297	down
LAMA1	7.15133e-17	-1.03858	2.05544e-12	down
LBH	8.72205e-13	-1.15011	2.50689e-08	down
LCN10	1.80099e-13	-1.3832	5.17641e-09	down
LEF1	1.73374e-11	-1.66019	4.98312e-07	down
LEP	3.09314e-08	-1.50291	0.000889031	down
LHFPL1	3.0514e-09	-1.39031	8.77032e-05	down
LHFPL3	3.75099e-16	-1.89436	1.07811e-11	down
LHFPL5	1.04495e-27	-1.17023	3.0034e-23	down
LIMK1	3.62075e-09	-1.22086	0.000104067	down
LIMS2	4.75799e-12	-1.5827	1.36754e-07	down
LMO1	4.63126e-07	-2.11441	0.0133112	down
LOC100423594	4.47101e-08	-2.69841	0.00128506	down
LOC100424795	1.73461e-15	-1.10841	4.98562e-11	down
LOC100425654	2.4935e-16	-1.05449	7.16683e-12	down
LOC100426005	1.51878e-69	-1.69962	4.36527e-65	down
LOC100427362	3.28106e-07	-1.21302	0.00943042	down
LOC100427680	1.49826e-10	-3.64592	4.30631e-06	down
LOC100430143	1.33862e-13	-1.23537	3.84745e-09	down
LOC100430668	1.66125e-06	-1.18315	0.0477478	down
LOC100430773	1.34304e-15	-2.69613	3.86017e-11	down
LOC106992627	3.04729e-11	-1.76894	8.75851e-07	down
LOC106992665	8.09558e-116	-2.99766	2.32683e-111	down
LOC106992835	3.66811e-12	-2.22111	1.05429e-07	down
LOC106993228	2.62808e-28	-2.14755	7.55363e-24	down
LOC106993245	1.50722e-59	-1.35603	4.33206e-55	down
LOC106993326	8.06887e-32	-1.03941	2.31915e-27	down
LOC106993343	5.23166e-08	-3.00048	0.00150368	down
LOC106993365	6.70911e-15	-1.27516	1.92833e-10	down
LOC106993529	1.07223e-11	-1.63125	3.08181e-07	down
LOC106993556	2.3762e-61	-1.42121	6.82967e-57	down
LOC106993811	1.50096e-09	-2.20856	4.31407e-05	down
LOC106993874	6.02834e-09	-1.01944	0.000173267	down
LOC106993983	1.17472e-23	-1.3101	3.37637e-19	down
LOC106994123	1.51405e-35	-1.01293	4.35167e-31	down
LOC106994204	1.35759e-103	-2.01647	3.90198e-99	down
LOC106994257	1.32168e-12	-1.62752	3.79877e-08	down
LOC106994385	1.58001e-53	-2.97607	4.54127e-49	down
LOC106994438	8.03658e-22	-1.19679	2.30987e-17	down
LOC106994488	1.20012e-18	-1.49723	3.44939e-14	down
LOC106994547	3.15828e-08	-2.16068	0.000907752	down
LOC106994770	1.43545e-08	-2.03808	0.000412578	down
LOC106994869	1.13026e-06	-2.57339	0.0324859	down
LOC106995143	8.48204e-11	-1.19075	2.43791e-06	down
LOC106995376	1.11922e-16	-1.80129	3.21687e-12	down
LOC106995677	7.25077e-12	-3.48623	2.08402e-07	down
LOC106995708	8.21668e-07	-2.28341	0.0236164	down
LOC106995887	1.22838e-22	-1.23019	3.5306e-18	down
LOC106995931	6.1044e-11	-1.13283	1.75453e-06	down
LOC106996153	8.68069e-07	-2.77989	0.0249501	down
LOC106996277	1.8922e-19	-5.07022	5.43856e-15	down
LOC106996343	1.68828e-67	-1.46323	4.85247e-63	down
LOC106996456	6.41625e-12	-1.1756	1.84416e-07	down
LOC106996565	5.67274e-13	-2.41956	1.63046e-08	down
LOC106996630	5.08521e-12	-1.02178	1.46159e-07	down
LOC106996686	1.59191e-20	-1.81698	4.57546e-16	down
LOC106996730	3.63081e-11	-2.78532	1.04357e-06	down
LOC106996741	1.44623e-14	-3.64667	4.15674e-10	down
LOC106996843	1.13248e-10	-1.6752	3.25499e-06	down
LOC106997094	1.9889e-100	-2.20182	5.71651e-96	down
LOC106997181	1.03275e-22	-1.13428	2.96833e-18	down
LOC106997278	6.76131e-08	-3.14238	0.00194334	down
LOC106997295	6.09893e-10	-1.22419	1.75296e-05	down
LOC106998188	5.91479e-13	-1.83621	1.70003e-08	down
LOC106998291	1.88022e-79	-1.74573	5.40411e-75	down
LOC106998502	8.35192e-14	-1.56434	2.40051e-09	down
LOC106998584	4.96624e-13	-1.39042	1.4274e-08	down
LOC106998609	1.64153e-08	-2.25191	0.000471808	down
LOC106998893	1.85519e-50	-1.1742	5.3322e-46	down
LOC106999127	1.60278e-13	-1.29445	4.60672e-09	down
LOC106999250	2.35755e-25	-1.227	6.77608e-21	down
LOC106999271	2.03997e-20	-2.35338	5.86329e-16	down
LOC106999357	5.0339e-43	-1.43028	1.44684e-38	down
LOC106999679	1.91033e-53	-3.01683	5.49066e-49	down
LOC107000088	3.41046e-11	-2.55818	9.80233e-07	down
LOC107000197	6.10348e-27	-1.58364	1.75426e-22	down
LOC107000224	1.98668e-37	-1.30841	5.71012e-33	down
LOC107000717	1.09614e-09	-1.08979	3.15051e-05	down
LOC107000942	1.71798e-16	-2.1531	4.93781e-12	down
LOC107000979	3.95421e-64	-2.29038	1.13652e-59	down
LOC114669724	3.11393e-08	-1.85163	0.000895006	down
LOC114669760	7.47095e-26	-1.35973	2.1473e-21	down
LOC114670005	1.5473e-45	-1.52476	4.44726e-41	down
LOC114670029	3.11362e-15	-1.13017	8.94917e-11	down
LOC114670061	1.58138e-135	-1.68536	4.54521e-131	down
LOC114670414	6.13207e-25	-2.44057	1.76248e-20	down
LOC114670461	1.32238e-07	-1.0143	0.00380079	down
LOC114670621	1.07544e-19	-3.21959	3.09104e-15	down
LOC114670691	3.97339e-80	-3.09841	1.14203e-75	down
LOC114670778	6.08106e-17	-2.01024	1.74782e-12	down
LOC114670792	7.28124e-57	-2.53828	2.09277e-52	down
LOC114671440	2.07389e-10	-3.11422	5.96078e-06	down
LOC114671957	5.72879e-07	-1.48505	0.0164657	down
LOC114672172	5.70399e-99	-1.34901	1.63944e-94	down
LOC114672188	3.31041e-09	-2.28843	9.51479e-05	down
LOC114672189	1.68083e-08	-2.35557	0.000483104	down
LOC114672410	3.54114e-09	-1.59827	0.000101779	down
LOC114672615	6.8677e-80	-1.34822	1.97391e-75	down
LOC114672705	1.57482e-09	-2.41231	4.52634e-05	down
LOC114672805	2.73087e-08	-1.62796	0.000784907	down
LOC114672813	4.48595e-78	-2.12782	1.28935e-73	down
LOC114672847	2.29175e-14	-1.66365	6.58695e-10	down
LOC114673459	1.36304e-06	-1.74433	0.0391764	down
LOC114673468	1.80739e-48	-1.73219	5.19479e-44	down
LOC114673534	1.23065e-08	-1.22572	0.000353715	down
LOC114673714	1.85838e-30	-1.07427	5.34135e-26	down
LOC114673786	4.07811e-10	-1.97961	1.17213e-05	down
LOC114673829	8.71824e-12	-1.09731	2.5058e-07	down
LOC114674136	5.11009e-13	-1.53108	1.46874e-08	down
LOC114674142	2.28163e-44	-1.54054	6.55787e-40	down
LOC114674188	2.34526e-48	-2.4819	6.74075e-44	down
LOC114675097	1.18298e-27	-1.64868	3.40013e-23	down
LOC114675216	2.16841e-07	-2.53133	0.00623244	down
LOC114675423	3.02452e-18	-1.92745	8.69307e-14	down
LOC114675428	4.58178e-12	-4.83191	1.3169e-07	down
LOC114675441	1.20778e-12	-4.86406	3.4714e-08	down
LOC114675507	3.20139e-66	-1.87688	9.20144e-62	down
LOC114675676	3.92661e-39	-2.45117	1.12859e-34	down
LOC114676231	8.36447e-08	-1.06916	0.00240412	down
LOC114676242	5.60873e-16	-1.34814	1.61206e-11	down
LOC114676952	2.74052e-30	-1.55913	7.87682e-26	down
LOC114676995	3.02835e-110	-3.69605	8.70409e-106	down
LOC114677127	1.78608e-76	-2.17217	5.13356e-72	down
LOC114677662	7.40625e-09	-2.4505	0.00021287	down
LOC114677677	3.81917e-18	-2.10055	1.09771e-13	down
LOC114677681	2.4322e-07	-1.06014	0.00699064	down
LOC114677684	1.3064e-60	-2.47143	3.75486e-56	down
LOC114678196	1.25846e-28	-1.45148	3.61708e-24	down
LOC114678208	1.37339e-08	-1.69264	0.00039474	down
LOC114678366	1.04847e-15	-1.93126	3.01351e-11	down
LOC114678427	1.49344e-38	-1.37707	4.29245e-34	down
LOC114678430	3.072e-13	-1.1624	8.82954e-09	down
LOC114678465	1.11846e-28	-1.69669	3.21466e-24	down
LOC114678945	5.91008e-20	-1.28999	1.69867e-15	down
LOC114678953	7.70735e-86	-1.60242	2.21525e-81	down
LOC114679249	1.23254e-08	-1.3786	0.000354256	down
LOC114679469	2.80318e-51	-1.6359	8.0569e-47	down
LOC114679524	2.76976e-13	-2.25329	7.96083e-09	down
LOC114679684	6.95467e-20	-4.38506	1.99891e-15	down
LOC114679690	5.78974e-17	-2.60378	1.66409e-12	down
LOC114680194	4.72644e-25	-1.95476	1.35847e-20	down
LOC114680352	1.05983e-19	-2.11951	3.04615e-15	down
LOC693283	4.71085e-25	-4.05482	1.35399e-20	down
LOC693399	8.45949e-37	-1.2507	2.43143e-32	down
LOC693415	2.65251e-30	-3.38216	7.62383e-26	down
LOC693908	3.62551e-14	-3.21785	1.04204e-09	down
LOC693973	2.02033e-07	-1.03234	0.00580684	down
LOC694256	1.36847e-47	-2.34763	3.93324e-43	down
LOC694372	5.94247e-43	-1.23617	1.70798e-38	down
LOC694743	2.68136e-07	-1.26557	0.00770676	down
LOC695989	8.88821e-10	-1.40206	2.55465e-05	down
LOC697783	3.16685e-15	-1.22461	9.10216e-11	down
LOC697857	6.66612e-10	-1.27285	1.91598e-05	down
LOC699053	1.08756e-16	-1.85847	3.12587e-12	down
LOC700344	9.35501e-30	-1.20746	2.68882e-25	down
LOC700412	1.72884e-07	-1.04044	0.00496903	down
LOC700765	6.33384e-80	-2.57861	1.82047e-75	down
LOC702823	1.71625e-07	-2.16749	0.00493286	down
LOC703528	3.61424e-12	-2.08755	1.0388e-07	down
LOC703959	9.52523e-21	-1.57418	2.73774e-16	down
LOC704783	3.76376e-31	-2.90944	1.08178e-26	down
LOC705514	7.47892e-29	-1.34061	2.14959e-24	down
LOC705521	4.27313e-07	-2.22288	0.0122818	down
LOC706505	2.72136e-09	-2.89041	7.82172e-05	down
LOC706718	1.28539e-14	-1.08766	3.69447e-10	down
LOC706970	1.64638e-08	-3.47464	0.000473203	down
LOC707129	1.5461e-06	-1.98973	0.0444379	down
LOC707459	3.56823e-09	-1.35377	0.000102558	down
LOC708221	1.05379e-69	-1.51878	3.0288e-65	down
LOC708725	1.5324e-06	-1.26756	0.0440443	down
LOC708864	1.10366e-08	-1.82437	0.000317213	down
LOC708874	7.96232e-35	-2.22839	2.28853e-30	down
LOC709304	6.06679e-17	-1.48623	1.74372e-12	down
LOC711690	1.28829e-06	-1.25541	0.037028	down
LOC712268	1.27566e-113	-3.42247	3.6665e-109	down
LOC713635	3.85339e-08	-1.28883	0.00110754	down
LOC713892	2.03566e-08	-1.00003	0.000585089	down
LOC714576	1.62328e-13	-1.72252	4.66563e-09	down
LOC714663	2.3574e-37	-1.81259	6.77562e-33	down
LOC715706	1.07448e-09	-1.52661	3.08827e-05	down
LOC715898	2.98869e-09	-1.67488	8.5901e-05	down
LOC715938	1.67342e-10	-1.26012	4.80973e-06	down
LOC716879	6.33646e-17	-1.57359	1.82122e-12	down
LOC716942	3.49582e-47	-1.25738	1.00477e-42	down
LOC717345	4.19978e-23	-1.61002	1.2071e-18	down
LOC718020	2.62819e-10	-1.49697	7.55394e-06	down
LOC718160	3.48557e-53	-2.53502	1.00182e-48	down
LOC718365	2.49638e-27	-1.61799	7.1751e-23	down
LOC718392	3.52118e-70	-1.84707	1.01206e-65	down
LOC722977	1.74555e-08	-2.25129	0.000501706	down
LONRF2	1.6057e-66	-1.34407	4.6151e-62	down
LOXL4	8.84994e-11	-2.00192	2.54365e-06	down
LPXN	1.20483e-09	-1.6336	3.46293e-05	down
LRCH3	4.52468e-08	-1.71059	0.00130048	down
LRMP	1.66248e-08	-1.73645	0.000477831	down
LRP5	8.85673e-80	-1.57323	2.5456e-75	down
LRRC1	2.85095e-47	-2.8957	8.19419e-43	down
LRRC23	1.56572e-14	-1.40787	4.50018e-10	down
LRRC46	1.5388e-06	-1.54636	0.0442282	down
LYPD6B	7.69645e-13	-1.53521	2.21211e-08	down
MAGI2	5.07077e-49	-1.68392	1.45744e-44	down
MAK	9.89655e-14	-1.13974	2.84447e-09	down
MALRD1	2.97644e-29	-1.12173	8.55489e-25	down
MAP1LC3C	5.10864e-11	-2.49737	1.46832e-06	down
MAPT	2.13104e-07	-1.26702	0.00612505	down
MAVS	7.8457e-11	-1.05757	2.25501e-06	down
MCCC1	2.08447e-09	-1.48651	5.99118e-05	down
MCOLN2	9.16182e-29	-2.65956	2.63329e-24	down
ME2	4.89167e-08	-1.36214	0.00140596	down
MEI4	1.88556e-29	-1.61593	5.41948e-25	down
MELK	4.54878e-08	-1.39058	0.00130741	down
MERTK	1.17883e-25	-1.09302	3.38819e-21	down
METAP1D	3.26339e-23	-1.45993	9.37963e-19	down
METTL3	2.49511e-09	-1.34116	7.17144e-05	down
MFAP2	2.3813e-07	-2.34016	0.00684435	down
MFF	3.47563e-16	-2.24405	9.98967e-12	down
MGARP	6.96859e-09	-1.39041	0.000200291	down
MKNK1	8.34491e-13	-1.59516	2.39849e-08	down
MLIP	2.24667e-26	-1.33642	6.45736e-22	down
MLYCD	3.01642e-09	-1.20278	8.6698e-05	down
MMD	1.92662e-07	-1.32518	0.0055375	down
MOCOS	1.23904e-07	-1.68962	0.00356126	down
MOS	3.43223e-07	-2.53868	0.0098649	down
MPC1	4.61284e-10	-1.38007	1.32582e-05	down
MPDZ	1.51404e-14	-1.21377	4.35166e-10	down
MPP4	1.16572e-26	-1.71541	3.35053e-22	down
MPP7	2.99e-12	-1.26286	8.59385e-08	down
MRO	4.19032e-35	-1.4088	1.20438e-30	down
MT1E	1.30961e-06	-2.05515	0.0376407	down
MT2A	1.62514e-11	-3.03254	4.67099e-07	down
MTAP	6.46705e-16	-3.03833	1.85876e-11	down
MTFR2	1.8653e-08	-1.24356	0.000536126	down
MTMR2	1.01975e-06	-1.73451	0.0293097	down
MTUS2	3.01617e-15	-1.95886	8.66908e-11	down
MUC15	3.58246e-18	-1.74116	1.02967e-13	down
MYO3B	8.44711e-20	-1.23173	2.42787e-15	down
MYO9A	4.6599e-11	-1.18775	1.33935e-06	down
MYRIP	9.20895e-21	-1.96831	2.64684e-16	down
N4BP2L2	6.16551e-08	-1.1136	0.00177209	down
NAPEPLD	5.16941e-18	-1.41668	1.48579e-13	down
NAT1	1.94174e-08	-1.12929	0.000558096	down
NAV2	7.62829e-53	-1.66975	2.19252e-48	down
NCOA2	7.02224e-16	-1.45767	2.01833e-11	down
NDRG1	9.47025e-10	-1.68748	2.72194e-05	down
NEBL	1.09934e-06	-1.07776	0.0315974	down
NELL1	6.1296e-21	-2.19193	1.76177e-16	down
NFATC2	4.72992e-24	-1.06139	1.35947e-19	down
NGEF	1.09513e-07	-1.35524	0.00314763	down
NHLRC2	5.46546e-18	-1.96398	1.57088e-13	down
NMNAT3	2.27301e-08	-1.96417	0.00065331	down
NR3C1	3.18644e-46	-1.74699	9.15846e-42	down
NR3C2	1.21966e-09	-1.55268	3.50556e-05	down
NRG4	8.56986e-09	-1.19421	0.000246315	down
NRP2	7.03412e-10	-1.88587	2.02175e-05	down
NRXN3	6.04343e-38	-1.94709	1.737e-33	down
NSUN6	1.53649e-08	-1.55829	0.000441617	down
NSUN7	2.41828e-12	-1.17311	6.95063e-08	down
NT5C3B	3.51903e-08	-1.4066	0.00101144	down
NT5DC1	1.4007e-08	-1.13759	0.00040259	down
NUP153	6.88357e-08	-1.37942	0.00197848	down
NUP62CL	1.37403e-19	-1.21964	3.94924e-15	down
NUP93	5.00995e-08	-1.29461	0.00143996	down
OAF	2.07528e-21	-2.93053	5.96477e-17	down
OCIAD2	2.23914e-12	-1.31526	6.43573e-08	down
OLFM2	2.39858e-08	-1.28518	0.0006894	down
OPTN	4.94693e-13	-1.3305	1.42185e-08	down
OSBPL10	3.14792e-11	-2.16795	9.04774e-07	down
OSBPL5	2.19285e-08	-1.02881	0.000630269	down
OSTF1	7.82353e-09	-2.10307	0.000224864	down
OVCH2	6.29621e-22	-2.48946	1.80966e-17	down
OVOL1	1.1722e-11	-1.67303	3.36912e-07	down
PACRG	1.78677e-28	-1.18802	5.13553e-24	down
PAGE4	5.14552e-14	-1.04461	1.47893e-09	down
PAPLN	1.43049e-11	-1.86987	4.1115e-07	down
PARD3B	5.12158e-45	-1.95238	1.47205e-40	down
PARVB	8.23507e-21	-1.33607	2.36692e-16	down
PCTP	2.14082e-51	-1.69082	6.15315e-47	down
PDE3A	1.93278e-54	-1.88204	5.55518e-50	down
PDGFRL	1.50889e-79	-2.30255	4.33686e-75	down
PDZD8	2.12816e-13	-1.29257	6.11675e-09	down
PFN2	4.23601e-10	-1.94213	1.21751e-05	down
PGA4	8.60139e-13	-1.01445	2.47221e-08	down
PGM1	3.70354e-21	-2.2866	1.06447e-16	down
PGM2	1.13229e-08	-1.63579	0.000325443	down
PGM2L1	7.23975e-15	-1.32665	2.08085e-10	down
PHEX	4.57859e-11	-1.87916	1.31598e-06	down
PHKB	3.84977e-11	-1.13586	1.1065e-06	down
PHYHIPL	6.34599e-09	-1.02624	0.000182396	down
PIBF1	2.00176e-09	-1.01766	5.75345e-05	down
PIGB	2.12854e-16	-1.18839	6.11786e-12	down
PIGN	2.24151e-17	-1.50736	6.44253e-13	down
PIH1D2	1.01996e-11	-1.54276	2.93156e-07	down
PIK3R1	4.07241e-36	-1.51173	1.17049e-31	down
PIM3	1.01621e-09	-1.34233	2.9208e-05	down
PIP5K1B	1.04345e-07	-1.13757	0.00299907	down
PIR	3.20648e-75	-1.49859	9.21607e-71	down
PIWIL1	5.16107e-11	-2.15897	1.48339e-06	down
PIWIL3	5.83918e-22	-2.4003	1.6783e-17	down
PKD1L3	5.66319e-19	-1.3687	1.62771e-14	down
PKNOX1	1.64031e-06	-1.05412	0.0471459	down
PKP2	7.83029e-10	-1.16237	2.25058e-05	down
PLAC8	1.0316e-06	-1.28069	0.0296503	down
PLCXD3	2.12287e-89	-1.68837	6.10155e-85	down
PLEK2	5.95352e-14	-1.29337	1.71116e-09	down
PLEKHG5	2.42423e-14	-1.38684	6.96772e-10	down
PLPP5	1.2522e-13	-1.05313	3.59908e-09	down
PLSCR1	2.5264e-15	-1.25821	7.26137e-11	down
PLXNC1	2.37338e-09	-1.21044	6.82156e-05	down
PMP22	8.84229e-08	-1.2812	0.00254145	down
PON1	1.96887e-17	-3.03256	5.65893e-13	down
PON3	1.58035e-06	-1.52958	0.0454224	down
PPEF1	4.83448e-36	-3.28644	1.38953e-31	down
PPP1R14C	3.55542e-14	-1.98716	1.0219e-09	down
PPP2R1B	4.346e-13	-1.48092	1.24913e-08	down
PPP2R5C	1.89225e-11	-1.64506	5.43871e-07	down
PPP4R1	2.37125e-07	-1.14206	0.00681544	down
PPTC7	9.85035e-14	-1.47613	2.83119e-09	down
PRG3	9.6961e-15	-1.98003	2.78685e-10	down
PRIM2	1.668e-10	-1.40535	4.79415e-06	down
PRIMPOL	6.71185e-26	-3.06754	1.92912e-21	down
PRKCE	4.10419e-99	-1.52892	1.17963e-94	down
PRKD1	5.11818e-53	-2.60099	1.47107e-48	down
PRKRA	2.13087e-14	-2.08518	6.12456e-10	down
PRL	1.30078e-18	-2.87466	3.7387e-14	down
PROKR2	3.34392e-11	-2.73049	9.6111e-07	down
PRPS1L1	1.43591e-51	-1.15479	4.1271e-47	down
PRSS16	1.49101e-09	-1.3709	4.28546e-05	down
PSD2	7.47813e-47	-1.67297	2.14936e-42	down
PSD3	8.87938e-09	-1.82595	0.000255211	down
PTER	2.52159e-20	-1.61442	7.24755e-16	down
PTPRH	3.80694e-19	-1.57413	1.09419e-14	down
PUDP	2.93502e-09	-1.17259	8.43585e-05	down
PXT1	3.54057e-22	-1.44323	1.01763e-17	down
RAB32	4.89432e-07	-1.5558	0.0140672	down
RAC2	3.41653e-16	-3.95808	9.81979e-12	down
RAC3	8.30065e-09	-1.05655	0.000238577	down
RAD51AP2	4.1486e-32	-1.66328	1.19239e-27	down
RAD9B	8.8754e-29	-1.85785	2.55097e-24	down
RALGPS1	5.08219e-08	-1.11702	0.00146072	down
RAPGEF6	7.98614e-20	-1.19393	2.29538e-15	down
RASGRP1	2.09132e-08	-1.12412	0.000601086	down
RASGRP3	9.75534e-32	-1.65459	2.80388e-27	down
RBMS2	3.82047e-10	-1.15398	1.09808e-05	down
REV1	7.01321e-08	-1.01018	0.00201574	down
RHOH	2.09221e-32	-2.23131	6.01343e-28	down
RHOXF2	1.99125e-08	-2.16364	0.000572326	down
RIBC1	1.60242e-10	-2.04665	4.60568e-06	down
RILPL2	4.50814e-12	-1.34875	1.29573e-07	down
RIT2	1.03367e-08	-2.19017	0.000297098	down
RNF169	1.63329e-06	-1.14127	0.046944	down
RNF212B	4.65855e-25	-1.00566	1.33896e-20	down
RNF24	2.28739e-11	-1.08439	6.57441e-07	down
ROS1	2.15172e-137	-1.37486	6.18448e-133	down
RRAS2	6.38075e-08	-1.35321	0.00183396	down
RTKN	6.11382e-10	-1.07357	1.75723e-05	down
S100A10	2.01526e-11	-3.51775	5.79225e-07	down
S100A2	5.57896e-09	-1.00311	0.00016035	down
SAXO1	2.46099e-27	-3.29363	7.07338e-23	down
SCAMP1	9.63988e-10	-1.48604	2.77069e-05	down
SCD5	4.42508e-29	-1.0097	1.27186e-24	down
SCMH1	6.31098e-16	-1.34768	1.8139e-11	down
SCP2	1.07415e-11	-1.77816	3.08731e-07	down
SENP8	3.61766e-08	-1.6883	0.00103979	down
SEPTIN8	4.77664e-09	-1.24694	0.00013729	down
SERPINE1	2.18156e-37	-1.75592	6.27025e-33	down
SGCZ	6.30686e-11	-1.32965	1.81272e-06	down
SGMS2	5.42002e-15	-2.27522	1.55782e-10	down
SGSM3	1.24135e-09	-1.12108	3.5679e-05	down
SH2D4B	8.97275e-11	-2.35552	2.57895e-06	down
SHC4	1.15911e-06	-1.62515	0.0333151	down
SHROOM2	9.88515e-14	-1.28875	2.84119e-09	down
SHTN1	3.60323e-07	-1.62123	0.0103564	down
SIL1	1.00003e-16	-2.112	2.87428e-12	down
SLAIN1	7.18306e-28	-1.45474	2.06456e-23	down
SLC10A7	7.52281e-27	-1.46003	2.16221e-22	down
SLC13A4	3.87503e-24	-1.39549	1.11376e-19	down
SLC25A10	2.6487e-11	-1.17673	7.6129e-07	down
SLC25A20	6.76396e-14	-1.44629	1.9441e-09	down
SLC25A21	1.7065e-27	-1.63895	4.90481e-23	down
SLC25A48	5.98535e-20	-2.06911	1.72031e-15	down
SLC28A3	2.17238e-07	-1.27001	0.00624387	down
SLC33A1	3.54969e-19	-1.24656	1.02025e-14	down
SLC35F4	3.90199e-27	-1.80011	1.12151e-22	down
SLC37A1	5.39941e-12	-1.26812	1.5519e-07	down
SLC38A2	6.10469e-07	-2.69549	0.0175461	down
SLC43A3	8.396e-14	-2.5038	2.41318e-09	down
SLC4A4	4.91761e-35	-1.5821	1.41342e-30	down
SLC5A1	5.45976e-50	-1.39934	1.56924e-45	down
SLC6A3	1.36644e-11	-1.33403	3.92743e-07	down
SLC7A1	6.33899e-13	-1.30359	1.82195e-08	down
SLC8A2	5.10709e-19	-1.46705	1.46788e-14	down
SLCO2A1	1.18556e-95	-1.79376	3.40753e-91	down
SLCO3A1	7.56162e-37	-1.14534	2.17336e-32	down
SMKR1	3.74895e-103	-1.83798	1.07752e-98	down
SNTG1	1.50793e-79	-1.67335	4.3341e-75	down
SNX10	1.25322e-09	-1.15246	3.60199e-05	down
SOHLH2	6.14875e-08	-1.76307	0.00176727	down
SORCS3	6.29509e-127	-1.48803	1.80933e-122	down
SOX30	2.70217e-16	-1.39166	7.76658e-12	down
SOX4	2.82658e-07	-1.2919	0.00812417	down
SPAG6	8.35225e-17	-1.29322	2.4006e-12	down
SPATA22	1.14695e-16	-1.97079	3.29656e-12	down
SPATA6L	3.66154e-18	-2.14235	1.0524e-13	down
SPDYA	3.00577e-51	-1.12035	8.63918e-47	down
SPHKAP	7.28507e-13	-1.08996	2.09387e-08	down
SPINDOC	1.43889e-15	-1.4432	4.13565e-11	down
SPOCK1	1.68992e-11	-1.08279	4.85715e-07	down
SRI	9.87183e-10	-2.06079	2.83736e-05	down
SSBP2	5.57954e-22	-2.38683	1.60367e-17	down
ST3GAL4	1.25417e-09	-1.86969	3.60472e-05	down
ST8SIA5	4.10423e-62	-1.73278	1.17964e-57	down
STARD4	1.7542e-24	-1.26407	5.04193e-20	down
STAT4	2.26502e-17	-1.50234	6.51011e-13	down
STK32C	9.99112e-08	-1.03901	0.00287165	down
STPG2	5.0838e-42	-1.76867	1.46119e-37	down
STRADB	2.03795e-07	-1.27403	0.00585748	down
STX11	1.57597e-06	-1.38764	0.0452964	down
SUCLG2	9.08435e-10	-1.23885	2.61102e-05	down
SUGCT	3.80323e-27	-1.1517	1.09312e-22	down
SULT2B1	1.96776e-23	-1.32537	5.65573e-19	down
SUPT3H	1.31508e-15	-2.26606	3.77981e-11	down
SVIP	2.65229e-09	-1.95962	7.6232e-05	down
SVOP	6.47381e-19	-2.00239	1.8607e-14	down
SYK	1.31098e-13	-1.24141	3.76802e-09	down
SYT2	1.83743e-39	-1.52035	5.28115e-35	down
TAB3	2.55849e-12	-1.03651	7.3536e-08	down
TACC3	1.92404e-09	-1.34873	5.53006e-05	down
TAFA2	6.37256e-21	-2.83734	1.8316e-16	down
TAFA4	4.29639e-15	-1.98928	1.23487e-10	down
TAT	7.28918e-09	-2.77541	0.000209505	down
TBC1D1	3.68377e-09	-1.33251	0.000105879	down
TBC1D31	3.61381e-07	-1.24426	0.0103868	down
TCEA3	4.6635e-49	-2.28911	1.34038e-44	down
TDRD1	5.40435e-26	-1.73237	1.55332e-21	down
TDRD3	2.3259e-19	-1.70144	6.6851e-15	down
TENT4A	4.80731e-10	-2.10625	1.38172e-05	down
TEX26	4.82277e-21	-1.29679	1.38616e-16	down
TFAP4	5.3035e-07	-1.55599	0.0152433	down
TFE3	1.17145e-08	-1.34785	0.000336699	down
THAP8	6.17422e-15	-1.17243	1.77459e-10	down
THBS4	2.31737e-07	-1.63874	0.00666058	down
THYN1	2.68885e-07	-1.67015	0.0077283	down
TIAM2	5.24117e-54	-1.77927	1.50642e-49	down
TIGIT	8.75199e-07	-1.50114	0.025155	down
TM4SF19	3.84043e-41	-1.34124	1.10382e-36	down
TM6SF1	1.7275e-08	-1.56735	0.000496518	down
TMC8	4.90663e-12	-1.29956	1.41026e-07	down
TMCC1	2.00211e-10	-1.34629	5.75447e-06	down
TMCO3	1.16916e-17	-1.88915	3.36041e-13	down
TMEM108	8.83367e-11	-1.47714	2.53897e-06	down
TMEM143	2.03602e-19	-1.35072	5.85194e-15	down
TMEM45B	1.5876e-12	-1.5977	4.56307e-08	down
TMEM51	1.59049e-18	-1.17743	4.57138e-14	down
TMEM56	4.24358e-14	-2.47513	1.21969e-09	down
TMEM68	5.3116e-09	-1.02042	0.000152666	down
TNFSF12	2.39147e-09	-1.19351	6.87357e-05	down
TOGARAM2	8.41611e-34	-2.51151	2.41896e-29	down
TRAF3IP2	9.19788e-37	-2.20737	2.64365e-32	down
TRIM45	6.33976e-10	-1.46998	1.82217e-05	down
TRIOBP	7.26882e-29	-1.46194	2.0892e-24	down
TRPC7	5.42903e-37	-2.63046	1.56041e-32	down
TSPAN2	4.83888e-14	-1.58848	1.39079e-09	down
TSPAN4	2.34023e-10	-1.0295	6.7263e-06	down
TTC39A	1.56153e-14	-1.43641	4.48816e-10	down
TTLL9	3.72853e-20	-1.85307	1.07165e-15	down
TWSG1	6.00516e-13	-1.25038	1.726e-08	down
UBB	1.06339e-08	-1.05819	0.000305638	down
UMAD1	8.33608e-21	-1.3517	2.39596e-16	down
UPK3A	8.25736e-17	-1.79666	2.37333e-12	down
USO1	2.08854e-08	-1.28266	0.000600289	down
USP25	1.36423e-11	-1.19375	3.92108e-07	down
USP6NL	5.79192e-21	-1.46282	1.66471e-16	down
VAV1	1.67063e-102	-1.51982	4.80172e-98	down
VAV3	2.01272e-17	-1.17097	5.78495e-13	down
WASF1	1.73409e-09	-1.44807	4.98413e-05	down
WBP2NL	4.31106e-15	-1.61034	1.23908e-10	down
WDR19	6.64436e-47	-2.01198	1.90972e-42	down
WDSUB1	6.78647e-11	-1.88666	1.95057e-06	down
WWC2	1.0833e-11	-1.31106	3.11361e-07	down
XAGE3	7.29524e-11	-1.2832	2.0968e-06	down
XKR9	1.45039e-61	-1.40603	4.16872e-57	down
YIPF6	5.97212e-13	-1.41472	1.71651e-08	down
ZADH2	3.47571e-07	-1.04783	0.00998988	down
ZBTB26	6.52626e-11	-1.33759	1.87578e-06	down
ZBTB49	1.47752e-28	-2.2911	4.24667e-24	down
ZDHHC13	3.58581e-15	-1.83979	1.03063e-10	down
ZDHHC21	6.38092e-59	-1.65446	1.834e-54	down
ZFP36L1	3.0291e-14	-1.54823	8.70623e-10	down
ZFP69	3.69446e-09	-1.59549	0.000106186	down
ZHX2	7.17478e-10	-1.16837	2.06218e-05	down
ZNF225	8.1317e-17	-1.88016	2.33721e-12	down
ZNF277	2.84125e-08	-1.27539	0.000816631	down
ZNF345	1.77245e-16	-1.11759	5.09437e-12	down
ZNF461	2.87669e-12	-1.49773	8.26817e-08	down
ZNF484	1.98536e-22	-1.10465	5.70632e-18	down
ZNF532	3.25345e-15	-1.74142	9.35107e-11	down
ZNF540	3.41686e-20	-2.13343	9.82073e-16	down
ZNF548	3.98387e-07	-1.24043	0.0114504	down
ZNF571	2.90288e-08	-1.15347	0.000834345	down
ZNF607	3.76932e-11	-1.2247	1.08338e-06	down
ZNF788P	1.71421e-06	-1.68793	0.04927	down
ZNF793	2.97305e-26	-1.17508	8.54513e-22	down
ZP1	1.83199e-21	-3.07089	5.26549e-17	down

## Sheet: GO enrichment of Omor up genes
GO enrichment of upregulated genes in Omor
Category	Term	Count	%	P-value	Genes
GOTERM_BP_DIRECT	GO:0006357~regulation of transcription by RNA polymerase II	52	9.5064	0.000145265	LOC719951, ZNF891, ZNF175, UBP1, LOC106995906, LOC100423439, IKZF4, ETS2, ZNF609, ZNF608, ZNF529, SALL4, ZNF644, KMT5A, LOC705754, TEAD2, VENTX, ZNF287, BATF2, MED9, ZBTB34, ZFY, FOXP3, MYCN, NUPR2, TP53, ZNF433, ZNF674, ZNF157, ZNF671, ATF6B, PLAG1, LOC717030, ZNF23, FOXO4, ZNF549, ZNF589, ZNF543, ZNF286A, ZNF221, ZNF382, FOXJ2, SUPT5H, LOC114669746, CTCFL, HEYL, MRGBP, LOC721591, SP4, SP3, ZNF6…
GOTERM_BP_DIRECT	GO:0055085~transmembrane transport	14	2.55941	0.00534023	SLC26A2, ABCB1, SLC35F2, SLC35E4, SLC43A1, ABCB9, SLC2A8, LOC114669790, LOC694255, LOC710876, FLVCR1, SLC17A7, SLC25A25, LOC720465
GOTERM_BP_DIRECT	GO:0009312~oligosaccharide biosynthetic process	3	0.548446	0.0194745	MGAT2, ST3GAL2, ST6GALNAC6
GOTERM_BP_DIRECT	GO:0034504~protein localization to nucleus	4	0.731261	0.0197361	PYGO1, CNEP1R1, RAP1GDS1, TOR1B
GOTERM_BP_DIRECT	GO:0072593~reactive oxygen species metabolic process	4	0.731261	0.0197361	SESN1, RFK, SESN2, TP53
GOTERM_BP_DIRECT	GO:0070059~intrinsic apoptotic signaling pathway in response to endoplasmic reticulum stress	4	0.731261	0.0216113	APAF1, TRIB3, LOC705933, TP53
GOTERM_BP_DIRECT	GO:1990253~cellular response to leucine starvation	3	0.548446	0.0230641	RRAGB, SESN1, SESN2
GOTERM_BP_DIRECT	GO:0006470~protein dephosphorylation	7	1.27971	0.0280806	LOC694255, DUSP5, PTPRJ, PTPN23, LOC709587, PPM1E, DUSP14
GOTERM_BP_DIRECT	GO:0006486~protein glycosylation	7	1.27971	0.0280806	B3GNT9, ST6GALNAC2, CRPPA, FUT11, MGAT2, ST3GAL2, ST6GALNAC6
GOTERM_BP_DIRECT	GO:0006396~RNA processing	5	0.914077	0.0302801	ISG20, PRPF39, SFSWAP, BICDL1, AEN
GOTERM_BP_DIRECT	GO:2000378~negative regulation of reactive oxygen species metabolic process	3	0.548446	0.0494337	MYCN, TP53, PLIN5

## Sheet: GO enrichment of Omor down gene
GO enrichment of downregulated genes in Omor
Category	Term	Count	%	P-value	Genes
GOTERM_BP_DIRECT	GO:0007264~small GTPase-mediated signal transduction	12	1.65746	0.000130493	TIAM2, VAV3, DOCK4, USO1, RAC2, RAC3, RHOH, RASGRP1, RAPGEF6, RALGPS1, VAV1, RASGRP3
GOTERM_BP_DIRECT	GO:0007265~Ras protein signal transduction	9	1.24309	0.00107525	RIT2, DOK5, DOK6, RRAS2, RASGRP1, RAPGEF6, DGKI, RALGPS1, RASGRP3
GOTERM_BP_DIRECT	GO:0030217~T cell differentiation	6	0.828729	0.00148566	TRAF3IP2, LEP, RHOH, PKNOX1, SOX4, VAV1
GOTERM_BP_DIRECT	GO:0010468~regulation of gene expression	13	1.79558	0.00440604	SHC4, LOC693908, LOC693283, CRIP1, SLC8A2, AFF2, NELL1, TFAP4, LOC106995677, LOC700412, LOC700765, LOC708864, ATP6V1B1
GOTERM_BP_DIRECT	GO:0060271~cilium assembly	13	1.79558	0.00646018	BBS2, DNAAF1, WDR19, ARMC9, SNX10, ACTR3B, KIF27, IFT52, TBC1D31, RILPL2, MAK, PIBF1, CLUAP1
GOTERM_BP_DIRECT	GO:1901331~positive regulation of odontoblast differentiation	3	0.414365	0.010632	BMP4, SERPINE1, LEF1
GOTERM_BP_DIRECT	GO:0034587~piRNA processing	4	0.552486	0.0107065	TDRD1, PIWIL1, PIWIL3, ASZ1
GOTERM_BP_DIRECT	GO:0006909~phagocytosis	6	0.828729	0.0120745	TAFA4, ANXA3, LEP, IRF8, MERTK, VAV1
GOTERM_BP_DIRECT	GO:0060391~positive regulation of SMAD protein signal transduction	5	0.690608	0.0138977	BMP4, NUP93, TWSG1, BMPR1A, BMP5
GOTERM_BP_DIRECT	GO:0051480~regulation of cytosolic calcium ion concentration	5	0.690608	0.0138977	TRPC7, CAV1, F2, HCRTR2, SLC8A2
GOTERM_BP_DIRECT	GO:0045588~positive regulation of gamma-delta T cell differentiation	3	0.414365	0.0146141	SYK, LEF1, SOX4
GOTERM_BP_DIRECT	GO:0000226~microtubule cytoskeleton organization	10	1.38122	0.0159045	FER, MELK, CMTM4, CETN2, TOGARAM2, TACC3, DCLK2, MAPT, TTLL9, PARD3B
GOTERM_BP_DIRECT	GO:0007155~cell adhesion	17	2.34807	0.0175519	EPHA4, CNTN5, LAMA1, NRXN3, PARVB, GRHL2, THBS4, PARD3B, CLDN10, FER, GPNMB, CCN6, CNTN1, ITGBL1, LPXN, CD226, CTNNA2
GOTERM_BP_DIRECT	GO:0008285~negative regulation of cell population proliferation	13	1.79558	0.0177117	DDR1, ZBTB49, MAGI2, WWC2, INCA1, NDRG1, BMP5, SULT2B1, TFAP4, ABI3BP, CCN6, SOX4, GSDME
GOTERM_BP_DIRECT	GO:0019370~leukotriene biosynthetic process	3	0.414365	0.0191317	SYK, ALOX5AP, PRG3
GOTERM_BP_DIRECT	GO:0007169~cell surface receptor protein tyrosine kinase signaling pathway	8	1.10497	0.0199351	DDR1, SHC4, EPHA4, SYK, DOK5, DOK6, MERTK, ROS1
GOTERM_BP_DIRECT	GO:0007283~spermatogenesis	14	1.9337	0.0201161	PIWIL1, SPATA6L, GAL3ST1, PIWIL3, MEI4, HSF2BP, MERTK, OVOL1, TDRD1, SCMH1, SOHLH2, ASZ1, SPDYA, ROS1
GOTERM_BP_DIRECT	GO:0035556~intracellular signal transduction	19	2.62431	0.021218	VAV3, SHC4, PAGE4, SYK, PRKCE, DCLK2, KALRN, MYO9A, VAV1, MELK, NRG4, MKNK1, MAK, DCDC2C, PLEK2, PRKD1, CAMK1, DGKI, STK32C
GOTERM_BP_DIRECT	GO:0046777~protein autophosphorylation	4	0.552486	0.02468	MOS, EPHA4, MKNK1, PIM3
GOTERM_BP_DIRECT	GO:1905515~non-motile cilium assembly	6	0.828729	0.0282349	BBS2, IFT52, MAK, IFT57, PIBF1, DPP3
GOTERM_BP_DIRECT	GO:0010976~positive regulation of neuron projection development	6	0.828729	0.0337273	DDR1, RIT2, CNTN1, PRKD1, CAMK1, SLC25A20
GOTERM_BP_DIRECT	GO:0030518~nuclear receptor-mediated steroid hormone signaling pathway	3	0.414365	0.0355801	ESRRG, NR3C1, NR3C2
GOTERM_BP_DIRECT	GO:0033120~positive regulation of RNA splicing	3	0.414365	0.0355801	HABP4, PIK3R1, SLC38A2
GOTERM_BP_DIRECT	GO:0043410~positive regulation of MAPK cascade	9	1.24309	0.0366805	MOS, GRM4, SYK, DOK5, LEP, DOK6, FGF19, PRKCE, GSDME
GOTERM_BP_DIRECT	GO:0031047~regulatory ncRNA-mediated gene silencing	4	0.552486	0.0412731	PIWIL1, PIWIL3, PRKRA, ASZ1
GOTERM_BP_DIRECT	GO:0006082~organic acid metabolic process	4	0.552486	0.0412731	LOC100424795, CYP2R1, CYP2C93, CYP2F1
GOTERM_BP_DIRECT	GO:0070254~mucus secretion	3	0.414365	0.0419285	TRAF3IP2, PRKCE, ADA
GOTERM_BP_DIRECT	GO:0042733~embryonic digit morphogenesis	5	0.690608	0.0432171	BMP4, IFT52, LRP5, GRHL2, BMPR1A
GOTERM_BP_DIRECT	GO:0035435~phosphate ion transmembrane transport	3	0.414365	0.0486632	SLC37A1, LOC114669760, SLC25A10
GOTERM_BP_DIRECT	GO:0007035~vacuolar acidification	3	0.414365	0.0486632	ATP6V0A4, ATP6V0D2, ATP6V1B1
GOTERM_BP_DIRECT	GO:0007605~sensory perception of sound	8	1.10497	0.0490825	CNTN5, MYO3B, LHFPL5, LHFPL3, ATP6V0A4, NAV2, TRIOBP, ATP6V1B1
