# Supplementary material
Source: Research Square preprint supplement (doi:10.21203/rs.3.rs-7771199/v1)
Supplement: Supplementary file 11 [file 8f4a817cdad8be835fe09ce9.xlsx]

## Sheet: major ZGA list
List of mouse major ZGA genes
0610005C13Rik
1110038B12Rik
1600002K03Rik
1600010M07Rik
1600012H06Rik
1600020E01Rik
1600025M17Rik
1700003E24Rik
1700013H16Rik
1700017B05Rik
1700029F12Rik
1700037H04Rik
1700080O16Rik
1700123O20Rik
1810026J23Rik
1810032O08Rik
2010320M18Rik
2210016L21Rik
2310011J03Rik
2310040G24Rik
2410002F23Rik
2410016O06Rik
2510002D24Rik
2610020H08Rik
2610028H24Rik
2610318N02Rik
2700038G22Rik
2810004N23Rik
2810013P06Rik
2900097C17Rik
3110056K07Rik
4921531C22Rik
4930427A07Rik
4930579G24Rik
4931409K22Rik
4933406J08Rik
5730408K05Rik
9030624G23Rik
9930104L06Rik
A830080D01Rik
A930015D03Rik
AA415398
AA467197
AA543401
Aacs
Abcc5
Abce1
Abhd14b
Abt1
Acaa1a
Acat2
Acer2
Acox1
Actr5
Adat3
Adi1
Adprhl2
Adrbk1
Aes
AF067061
AF067063
Aff4
Agpat9
Agrp
AI464131
AI846148
Ajuba
Ak6
Akirin1
Akt1s1
Alkbh1
Alkbh4
Alox12
Alpl
Alppl2
Alyref
Amhr2
Ankmy2
Ankrd10
Ankrd22
Ankrd33b
Ankrd37
Ankrd54
Anp32e
Ap1s1
Ap2a2
Ap4b1
Ap4s1
Apmap
Apoc2
Apol7b
Apol7e
Apom
Aqp11
Arf2
Arf4
Arfgap2
Arg1
Arhgap8
Arhgdig
Arid4b
Arid5a
Arih2
Arl2bp
Arrdc3
Arv1
Asl
Atg13
Atg9a
Atxn3
Atxn7l3b
AU015228
AU018091
AU022252
AW209491
Axin1
B020004C17Rik
B020004J07Rik
B020031M17Rik
B230354K17Rik
B3galt4
B4galnt2
B4galt1
B4galt3
Bach1
Bag5
BB287469
BC003965
BC005537
BC017643
BC026585
BC027231
BC028528
BC080695
BC147527
Bcat1
Bcl10
Bcl2l11
Bcl2l14
Becn2
Bend3
Bet1l
Bex1
Bex6
Bhmt2
Bid
Bop1
Bspry
Btbd18
Bysl
Bzw2
C1qtnf4
C1s2
Cabp1
Cacybp
Calcoco2
Calml4
Capsl
Cars2
Casc3
Casp3
Casp6
Cbfb
Cbl
Cbln1
Cbwd1
Ccdc126
Ccdc137
Ccdc36
Ccdc94
Ccnb1ip1
Ccnjl
Cct6a
Cd24a
Cd3eap
Cd63
Cd74
Cdan1
Cdc25c
Cdc5l
Cdk2
Cdk4
Cdk9
Cdkn1a
Cdkn2d
Ceacam1
Cenpi
Cep97
Chchd4
Chd1
Chek2
Chit1
Chka
Chrac1
Chst12
Churc1
Cited1
Cldn6
Cldn9
Clhc1
Clp1
Clu
Cndp2
Cnpy3
Coil
Colgalt1
Commd5
Commd7
Coq4
Cox7a1
Cpn1
Cpsf6
Crebrf
Creld1
Crem
Crtap
Crxos
Csrnp1
Cst7
Cstf2t
Ctdnep1
Ctdp1
Ctrb1
Ctsa
Ctsc
Ctsl
Ctsz
Cttn
Cuedc2
Cwc25
Cxadr
Cyb5d1
Cyp20a1
Cystm1
D030056L22Rik
D16Ertd472e
D1Pas1
D430020J02Rik
D5Ertd605e
D7Ertd143e
Dancr
Dbnl
Dbr1
Dbt
Dck
Ddit4l
Ddx17
Ddx20
Ddx21
Ddx54
Deaf1
Decr2
Dedd2
Def8
Defb42
Dennd5a
Dgke
Dhcr7
Dhrs11
Dhtkd1
Dhx33
Dhx9
Dido1
Dis3
Dkkl1
Dmrtb1
Dnaaf2
Dnajb14
Dnajc12
Dnajc4
Dnm2
Dnpep
Dnph1
Dohh
Dolk
Dpagt1
Dpf2
Dph2
Dpm1
Dpm1-adnp
Dr1
Drc1
Drg2
Dst
Duoxa2
Dusp6
Duxbl1
Dync1li1
Dyrk3
E130309D02Rik
E230013L22Rik
Eaf1
Ebp
Echdc2
Efhd1
Egln2
Ei24
Eid2
Eif1a
Eif2ak3
Eif2b5
Eif4ebp1
Ell2
Elovl6
Elp6
Emc9
Eme1
Epb4.1l4aos
Epcam
Epm2a
Eral1
Ercc4
Esf1
Esp24
Etv5
Eva1a
Exd2
Exosc2
Exosc6
F11r
Faap24
Faf2
Fam109a
Fam134a
Fam136a
Fam13b
Fam159a
Fam169b
Fam175b
Fam212a
Fam214b
Fam76a
Fbl
Fbxo45
Fbxo47
Fbxo6
Fbxw2
Fbxw9
Fcgr3
Fgf1
Ficd
Fkbp4
Folr1
Foxi3
Fthl17
Fxr2
Fyttd1
G2e3
Gabarap
Gabpa
Gadd45a
Gadd45b
Gal
Gal3st2
Galt
Gapdh
Gar1
Gart
Gas5
Gata1
Gata4
Gcnt2
Gcsh
Gemin2
Gemin4
Gemin5
Gfod2
Gfpt1
Ggnbp2
Ggt6
Gja1
Gla
Glb1
Gldc
Glmp
Glod5
Gls2
Gltscr1l
Gltscr2
Glul
Gm10653
Gm10696
Gm10697
Gm11237
Gm11423
Gm11487
Gm11517
Gm11544
Gm11758
Gm12070
Gm12789
Gm12794
Gm13034
Gm13043
Gm13057
Gm13078
Gm13102
Gm13119
Gm13128
Gm13247
Gm14326
Gm14458
Gm14511
Gm15056
Gm15455
Gm16381
Gm16513
Gm1995
Gm2016
Gm2022
Gm2027
Gm20337
Gm20767
Gm20939
Gm21293
Gm21304
Gm21319
Gm25500
Gm2a
Gm3258
Gm3286
Gm4027
Gm428
Gm4340
Gm4567
Gm4850
Gm4858
Gm4971
Gm5039
Gm5128
Gm5634
Gm5635
Gm5662
Gm6568
Gm6763
Gm6880
Gm7102
Gm773
Gm8300
Gm8764
Gm8994
Gm9
Gm9125
Gm9895
Gm9994
Gna11
Gnl3l
Gnpda1
Gpatch3
Gpatch4
Gpkow
Gpn3
Gpr161
Gpr50
Gpr83
Gpx1
Gpx7
Grb2
Grhl2
Gripap1
Grwd1
Gskip
Gss
Gsto1
Gt(ROSA)26Sor
Gtf2h4
Gtf2i
Gtf3c4
Gtf3c5
Gtpbp3
Guca1a
H2-D1
H2-Q10
H2-Q6
H2-Q7
H2-Q8
H2-Q9
H2-T22
H2-T9
Hars
Hars2
Hba-a1
Hbegf
Hccs
Hcrt
Hdac1
Heatr3
Herc4
Hes1
Hesx1
Hexb
Hexim1
Hic2
Hinfp
Hipk1
Hipk3
Hist1h1b
Hist1h2ae
Hist1h2ag
Hist1h2an
Hist1h2ao
Hist1h4d
Hist1h4i
Hist2h2ac
Hmbox1
Hmgcl
Hmmr
Hnrnpm
Hormad1
Hotairm1
Hpdl
Hs6st1
Hsd17b14
Hsd17b6
Hspbp1
Iah1
Icam1
Id1
Id2
Ier3
Ier3ip1
Ifi35
Ifitm1
Ikzf5
Impdh1
Impdh2
Ing4
Ino80c
Ints5
Ipo11
Ipo4
Ipo7
Irgq
Isg20
Isg20l2
Isyna1
Itgb5
Itpa
Itpkc
Jmy
Kank4
Kcnk6
Kdm3a
Kdm4c
Kdm5b
Khdrbs1
Kif18b
Kif3c
Klf13
Klf16
Klf4
Klf5
Klf9
Klhdc4
Klhl10
Klhl11
Klhl21
Klhl7
Klrg2
Knop1
Kpna1
Kpna6
L1td1
L2hgdh
Lat2
Lbhd1
Lbx2
Lck
Lctl
Leng1
Leng8
Lgals1
Lgals3
Lias
Lima1
Lincenc1
Lmnb1
Lmx1a
LOC100502896
Lpar6
Lpcat3
Lrrc58
Lst1
Lta
Lysmd1
Lysmd3
Mafg
Mafk
Maged1
Mak16
Malat1
Man2c1os
Map2k3
Map2k7
Map3k3
Mapk14
Mars2
Mcl1
Mcts2
Mdp1
Med24
Mesdc2
Metap1
Mettl2
Mettl22
Mfap5
Mfn2
Mfsd5
Mfsd7c
Mga
Mgat2
Mid1ip1
Mir144
Mir1896
Mir1956
Mir3064
Mir338
Mir451a
Mir465b-2
Mir465c-2
Mir592
Mir692-2
Mir692-3
Mir6956
Mir704
Mir7669
Mir8098
Mir883a
Mknk2
Mmp19
Mns1
Morc2a
Mpdu1
Mpp1
Mpv17
Mrps34
Msantd2
Msrb1
Msto1
Mt1
Mt2
Mta2
Mtch2
Mthfr
Mtrr
Muc13
Mybbp1a
Myc
Myg1
Nabp1
Nabp2
Nacc1
Nanp
Narfl
Ncapd2
Ncbp1
Ncmap
Ndrg3
Necap1
Necap2
Nefl
Nelfb
Nfatc3
Nicn1
Nipa2
Nipal1
Nkiras2
Nktr
Nmb
Nme2
Nmnat1
Nob1
Nol11
Nol9
Nom1
Nop16
Nop2
Npat
Npepps
Npl
Nptx2
Nr2c2
Nr5a2
Nsun5
Nt5c3b
Nucb2
Nudt3
Nudt4
Nufip1
Nup62cl
Nupr1
Obox3
Obox6
Ola1
Olfml3
Oraov1
Ormdl2
Ormdl3
Osbpl6
Ovol2
P4ha2
Pabpc1
Pak2
Pank3
Papolb
Parp9
Pced1b
Pcgf5
Pcsk1n
Pcyt2
Pdcd11
Pde6a
Pdp2
Pdpr
Pds5a
Pdxk
Pdxp
Pemt
Pgam2
Pgd
Pgm3
Phkg2
Phrf1
Pi4k2a
Pigh
Pik3cb
Pim2
Pim3
Pin1
Pip4k2c
Pip5k1a
Pip5k1c
Pitpnb
Pknox1
Pla2g15
Pla2g16
Platr17
Platr22
Plcd4
Plekhf2
Plin2
Plp2
Pmm2
Pmpca
Pnldc1
Pnp2
Poglut1
Polq
Polr1b
Polr2m
Polr3c
Polr3d
Polr3e
Polr3g
Polr3h
Ppat
Ppcs
Ppil1
Ppm1g
Ppp1r2
Ppp1r8
Ppp2cb
Pprc1
Pqlc1
Pqlc2
Pramef25
Pramef6
Pramel3
Pramel4
Pramel5
Pramel6
Pramel7
Prdx4
Prelid2
Prkcd
Prkcg
Prmt5
Prmt6
Prosc
Prpf4
Prps1
Prr11
Prr19
Prr5
Prrg2
Prss45
Prss46
Psat1
Psmd13
Pspc1
Ptdss2
Ptp4a1
Ptpn1
Ptpn9
Ptrf
Ptrh1
Pum1
Pus1
Pwp1
Qpctl
Rab10os
Rab11b
Rab11fip5
Rab19
Rab20
Rab24
Rab26os
Rab2b
Rab33b
Rab34
Rab39
Rab40c
Rab43
Rab5a
Rabgef1
Rad9a
Ranbp10
Rangap1
Rapgefl1
Rarg
Rasl10a
Rassf8
Rbbp6
Rbm10
Rbm14
Rbm3os
Rbmx
Rbp7
Rcor2
Rdm1
Relb
Renbp
Rfpl4b
Rgcc
Rgs11
Rhof
Rilpl2
Rlf
Rmnd5b
Rnf11
Rnf138rt1
Rnf6
Rngtt
Rnmtl1
Rpl3l
Rpp25
Rpp40
Rprd1b
Rps27
Rpusd1
Rpusd3
Rrp12
Rrp7a
Rrp9
Rrs1
Rtn2
Rusc1
Rwdd4a
Safb
Sapcd2
Sat2
Sbno1
Scd1
Sco2
Sdad1
Sde2
Sdr39u1
Sec1
Sec14l1
Sec23b
Sec24a
Sec61a2
Sertad1
Sesn1
Sesn2
Sfi1
Sfn
Sgk1
Sgpp1
Shmt1
Sigmar1
Sike1
Simc1
Slc12a2
Slc16a6
Slc19a3
Slc1a1
Slc1a5
Slc25a25
Slc25a28
Slc25a36
Slc25a44
Slc27a5
Slc2a3
Slc30a6
Slc34a2
Slc35e2
Slc35e3
Slc39a1
Slc39a4
Slc39a7
Slc4a11
Slc5a3
Slc5a6
Slco4c1
Sltm
Smad7
Smarcc1
Smcr8
Smek1
Smg5
Smyd5
Snai1
Snapc2
Snhg12
Snhg20
Snhg3
Snhg4
Snhg5
Snhg7
Snip1
Snora43
Snora52
Snora68
Snora81
Snord104
Snord11
Snord16a
Snord33
Snord35a
Snord38a
Snord55
Snord67
Snord8
Snord91a
Snord92
Snrnp35
Snx5
Socs1
Socs2
Socs3
Sord
Sp1
Sp140
Sp2
Sp3
Sp6
Spata2
Spdye4b
Spic
Spink2
Spns1
Sppl3
Spry2
Spryd4
Spsb3
Spz1
Sqle
Srpr
Srsf6
Ssc4d
Stac2
Stil
Stk19
Stk40
Stmn3
Sugp1
Sult2b1
Surf6
Suv420h1
Sva
Syap1
Syncrip
Syngr1
Taf4b
Tasp1
Tatdn2
Tbl2
Tbl3
Tbx3
Tbxa2r
Tceb3
Tchp
Tdpoz1
Tdpoz2
Tdpoz4
Tdpoz5
Tef
Tes
Tex101
Tfpi
Tfrc
Tgoln1
Tgoln2
Tgs1
Thop1
Timd2
Timm22
Tktl1
Tlcd2
Tmed4
Tmed6
Tmem159
Tmem160
Tmem170
Tmem189
Tmem223
Tmem229b
Tmem234
Tmem254b
Tmem37
Tmem79
Tmem92
Tmppe
Tmsb15b1
Tmsb4x
Tmx1
Tnfaip6
Tnfaip8l2
Tnfrsf12a
Tnfsf12
Tnpo3
Toe1
Tomm5
Tor1aip2
Tor1b
Tox4
Tprkb
Tra2a
Traf2
Trap1a
Trib3
Trim43a
Trim43b
Trim43c
Trip13
Trmt10a
Trmt61a
Trmt61b
Trub2
Tsen15
Tsen2
Tsen54
Tsga8
Tslp
Tspan4
Tspyl2
Tsr1
Tsr2
Tssc4
Tsx
Ttf1
Tti2
Ttyh2
Tuft1
Uap1l1
Ubald1
Ube2o
Ubtd1
Ubtd2
Ubtf
Ubtfl1
Ubxn7
Ubxn8
Ulk1
Umps
Unc119b
Upk1a
Uqcc3
Urm1
Usf1
Usp17lb
Usp17lc
Usp17ld
Usp17le
Usp29
Usp36
Usp50
Utp14b
Utp23
Vhl
Vimp
Vps37b
Wbscr22
Wdr18
Wdr3
Wdr4
Wdr44
Wdr45
Wdr45b
Wdr46
Wdr55
Wdr77
Wdr81
Wdtc1
Wdyhv1
Wibg
Wipi2
Wrap53
Wrb
Wwtr1
Xpnpep1
Xylb
Yars
Yeats2
Ylpm1
Yrdc
Yy1
Zbtb17
Zbtb43
Zbtb5
Zbtb8a
Zbtb9
Zc3h12a
Zc3hc1
Zcchc13
Zfp1
Zfp217
Zfp239
Zfp263
Zfp280c
Zfp317
Zfp346
Zfp352
Zfp367
Zfp386
Zfp42
Zfp54
Zfp566
Zfp599
Zfp617
Zfp622
Zfp623
Zfp637
Zfp644
Zfp647
Zfp7
Zfp707
Zfp775
Zfp809
Zfp810
Zfp825
Zfp868
Zfp869
Zfp874b
Zfp948
Zfp949
Zfp954
Zfx
Zgpat
Zscan4a
Zscan4b
Zscan4c
Zscan4d
Zscan4f
Zscan5b
Zyg11a
2210409E12Rik
AK010878
Akap8
Aprt
Asna1
Bzw1
Cbll1
Ccdc25
Ccne1
Cd320
Cdk2ap1
Cggbp1
Clpp
Ctsb
D230025D16Rik
Dnajb9
Dppa4
Eci1
Eef2
EU599041
Fbxo15
Fem1c
Fth1
Ftl1
G3bp1
Gabarapl2
Gde1
Gm10662
Gm11974
Gm16367
Gm29766
Gm3139
Gm6902
Gpank1
Gpd1l
H2afz
Hiat1
Hmbs
Hmgb3
Hspb1
Kctd20
Kti12
Lamp2
Larp1b
Lars2
Lsg1
Lsm12
Lsm8
Mad2l1bp
Map1lc3a
Map1lc3b
Mat2a
Mkrn1
Mrpl20
Mrps11
Mrps26
Mtf2
Nans
Nhp2
Nr2c2ap
Ntmt1
Nudt21
Pa2g4
Pabpn1
Pgam1
Pglyrp1
Pmm1
Polr1c
Polr1e
Polr2h
Ppm1a
Prps1l3
Prr13
Prr23a1
Psmd7
Rbm5
Rbmx2
Rhebl1
Rnf125
Rnf7
Rpl10l
Rpl37a
Rpl9
Rplp0
Ruvbl1
Sac3d1
Sat1
Sebox
Serp1
Sgta
Ska2
Snora21
Snrpa
Snrpb
Snrpc
Snrpn
Ssr2
Tfb2m
Tfg
Tigar
Timm10
Tiprl
Tmem120a
Tmem41b
Tomm20
Tpm3
Twistnb
Ubap1
Ubl7
Uqcrc1
Usp22
Uspl1
Wdr74
Wsb1
Yy2
Zfp936
Znhit3

## Sheet: C1-C4 gene list
List of ZGA genes with different expression patterns
C1	C2	C3	C4
1600025M17Rik	2310040G24Rik	1700013H16Rik	0610005C13Rik
2410002F23Rik	2410016O06Rik	1700017B05Rik	1110038B12Rik
2510002D24Rik	5730408K05Rik	2210409E12Rik	1600002K03Rik
3110056K07Rik	Actr5	4931409K22Rik	1600010M07Rik
Acaa1a	AF067061	AA415398	1600012H06Rik
Apoc2	Alyref	AA543401	1600020E01Rik
B4galt1	B020031M17Rik	Akap8	1600025M17Rik
Ccnjl	BB287469	Alox12	1700003E24Rik
Cd74	Bet1l	Alppl2	1700029F12Rik
Cdkn1a	Bex6	Arf2	1700037H04Rik
Cep97	Bzw2	Arrdc3	1700080O16Rik
Coq4	C1qtnf4	Asl	1700123O20Rik
Ctsz	D030056L22Rik	Asna1	1810026J23Rik
Dnpep	Dancr	AU015228	1810032O08Rik
Dolk	Dnph1	B4galnt2	2010320M18Rik
Exosc6	Dpm1	B4galt1	2210016L21Rik
Fam134a	Epb4.1l4aos	Bag5	2310011J03Rik
Fam212a	Epm2a	BC005537	2410002F23Rik
Fam214b	Exosc6	Bend3	2510002D24Rik
Fbxw9	Gabarapl2	C1s2	2610020H08Rik
Gal	Gadd45a	Cbll1	2610028H24Rik
Gata1	Gadd45b	Cbln1	2610318N02Rik
Gm13034	Gar1	Cdan1	2700038G22Rik
Gm3258	Gm20767	Cenpi	2810004N23Rik
Gna11	Gm5039	Cldn6	2810013P06Rik
Gpatch3	Gpx1	Ctsc	2900097C17Rik
Gsto1	Hist1h1b	D7Ertd143e	3110056K07Rik
Hba-a1	Hormad1	Def8	4921531C22Rik
Hbegf	Hpdl	Dhx9	4930427A07Rik
Hist2h2ac	Ier3ip1	Dido1	4930579G24Rik
Ifitm1	Isg20l2	Dpf2	4933406J08Rik
Impdh1	Isyna1	Dpm1-adnp	9030624G23Rik
Lck	Klf9	Drc1	9930104L06Rik
Lgals1	Klhl7	Dusp6	A830080D01Rik
Mafk	Lgals1	Elp6	A930015D03Rik
Mknk2	Lsm12	EU599041	AA467197
Msrb1	Mafg	Exd2	Aacs
Nefl	Mfap5	F11r	Abcc5
Nelfb	Mt2	Fam136a	Abce1
Nmnat1	Nipa2	Fam169b	Abhd14b
Ormdl3	Nme2	Fam175b	Abt1
Pip4k2c	Platr17	Fbxo47	Acat2
Ptrf	Polr2m	Fthl17	Acer2
Qpctl	Rab24	Fxr2	Acox1
Rab10os	Rpl37a	Gal	Adat3
Rab11fip5	Rrs1	Gata1	Adi1
Rcor2	Rwdd4a	Gcnt2	Adprhl2
Relb	Sec1	Ggnbp2	Adrbk1
Rpusd1	Snhg20	Gltscr1l	Aes
Sat2	Snx5	Glul	AF067063
Sfi1	Sva	Gm13078	Aff4
Sfn	Tmem160	Gm13128	Agpat9
Snhg12	Tmem189	Gm15455	Agrp
Snord104	Tomm5	Gm1995	AI464131
Snord38a	Tra2a	Gm29766	AI846148
Snord55	Trim43b	Gm4850	Ajuba
Socs1	Trmt61b	Gm7102	Ak6
Socs3	Tsen15	Gm773	Akirin1
Tlcd2	Tsga8	Gm9994	Akt1s1
Tmem160	Yrdc	Gnl3l	Alkbh1
Tmem37		Gpr50	Alkbh4
Tnfaip6		Gpr83	Alpl
Tsen54		Gripap1	Amhr2
Tssc4		Gss	Ankmy2
Zbtb9		Herc4	Ankrd10
Hspb1		Hexim1	Ankrd22
		Hipk1	Ankrd33b
		Hipk3	Ankrd37
		Hmbox1	Ankrd54
		Hs6st1	Anp32e
		Icam1	Ap1s1
		Ikzf5	Ap2a2
		Irgq	Ap4b1
		Kank4	Ap4s1
		Kdm3a	Apmap
		Kif3c	Apoc2
		Klf13	Apol7b
		L1td1	Apol7e
		Lck	Apom
		Lincenc1	Aqp11
		Malat1	Arf4
		Mapk14	Arfgap2
		Med24	Arg1
		Mfn2	Arhgap8
		Mmp19	Arhgdig
		Morc2a	Arid4b
		Mtf2	Arid5a
		Muc13	Arih2
		Nacc1	Arl2bp
		Nans	Arv1
		Nefl	Atg13
		Npepps	Atg9a
		Nup62cl	Atxn3
		Olfml3	Atxn7l3b
		Pa2g4	AU018091
		Pde6a	AU022252
		Pdp2	AW209491
		Pdpr	Axin1
		Phkg2	B020004C17Rik
		Pim2	B020004J07Rik
		Pip5k1a	B230354K17Rik
		Pip5k1c	B3galt4
		Plin2	B4galt3
		Pnp2	Bach1
		Polq	BC003965
		Polr1b	BC017643
		Pramel3	BC026585
		Prkcg	BC027231
		Pspc1	BC028528
		Ptdss2	BC080695
		Ptpn9	BC147527
		Rab11fip5	Bcat1
		Ranbp10	Bcl10
		Rapgefl1	Bcl2l11
		Rbm5	Bcl2l14
		Rgcc	Becn2
		Rgs11	Bex1
		Rlf	Bhmt2
		Rnf6	Bid
		Sat1	Bop1
		Sbno1	Bspry
		Scd1	Btbd18
		Sdr39u1	Bysl
		Sfi1	Cabp1
		Slc30a6	Cacybp
		Slc34a2	Calcoco2
		Slc39a4	Calml4
		Slc5a3	Capsl
		Smcr8	Cars2
		Snrpn	Casc3
		Sp1	Casp3
		Sp6	Casp6
		Stil	Cbfb
		Tbx3	Cbl
		Tef	Cbwd1
		Tfpi	Ccdc126
		Timd2	Ccdc137
		Tktl1	Ccdc36
		Tox4	Ccdc94
		Tsr1	Ccnb1ip1
		Ttf1	Cct6a
		Ubald1	Cd24a
		Ubap1	Cd3eap
		Ube2o	Cd63
		Usp17lb	Cd74
		Usp22	Cdc25c
		Usp50	Cdc5l
		Wdr45	Cdk2
		Wrb	Cdk4
		Ylpm1	Cdk9
		Yy2	Cdkn2d
		Zbtb43	Ceacam1
		Zcchc13	Chchd4
		Zfp1	Chd1
		Zfp217	Chek2
		Zfp280c	Chit1
		Zfp386	Chka
		Zfp42	Chrac1
		Zfp868	Chst12
		Zfp869	Churc1
		Zfp936	Cited1
		Zfp948	Cldn9
		Zfp954	Clhc1
		Zscan4a	Clp1
		Zscan4c	Clu
		Zscan4d	Cndp2
		Zscan4f	Cnpy3
			Coil
			Colgalt1
			Commd5
			Commd7
			Cox7a1
			Cpn1
			Cpsf6
			Crebrf
			Creld1
			Crem
			Crtap
			Crxos
			Csrnp1
			Cst7
			Cstf2t
			Ctdnep1
			Ctdp1
			Ctrb1
			Ctsa
			Ctsl
			Cttn
			Cuedc2
			Cwc25
			Cxadr
			Cyb5d1
			Cyp20a1
			Cystm1
			D16Ertd472e
			D1Pas1
			D430020J02Rik
			D5Ertd605e
			Dbnl
			Dbr1
			Dbt
			Dck
			Ddit4l
			Ddx17
			Ddx20
			Ddx21
			Ddx54
			Deaf1
			Decr2
			Dedd2
			Defb42
			Dennd5a
			Dgke
			Dhcr7
			Dhrs11
			Dhtkd1
			Dhx33
			Dis3
			Dkkl1
			Dmrtb1
			Dnaaf2
			Dnajb14
			Dnajc12
			Dnajc4
			Dnm2
			Dohh
			Dpagt1
			Dph2
			Dr1
			Drg2
			Dst
			Duoxa2
			Duxbl1
			Dync1li1
			Dyrk3
			E130309D02Rik
			E230013L22Rik
			Eaf1
			Ebp
			Echdc2
			Efhd1
			Egln2
			Ei24
			Eid2
			Eif1a
			Eif2ak3
			Eif2b5
			Eif4ebp1
			Ell2
			Elovl6
			Emc9
			Eme1
			Epcam
			Eral1
			Ercc4
			Esf1
			Esp24
			Etv5
			Eva1a
			Exosc2
			Faap24
			Faf2
			Fam109a
			Fam13b
			Fam159a
			Fam76a
			Fbl
			Fbxo45
			Fbxo6
			Fbxw2
			Fbxw9
			Fcgr3
			Fgf1
			Ficd
			Fkbp4
			Folr1
			Foxi3
			Fyttd1
			G2e3
			Gabarap
			Gabpa
			Gal3st2
			Galt
			Gapdh
			Gart
			Gas5
			Gata4
			Gcsh
			Gemin2
			Gemin4
			Gemin5
			Gfod2
			Gfpt1
			Ggt6
			Gja1
			Gla
			Glb1
			Gldc
			Glmp
			Glod5
			Gls2
			Gltscr2
			Gm10653
			Gm10696
			Gm10697
			Gm11237
			Gm11423
			Gm11487
			Gm11517
			Gm11544
			Gm11758
			Gm12070
			Gm12789
			Gm12794
			Gm13034
			Gm13043
			Gm13057
			Gm13102
			Gm13119
			Gm13247
			Gm14326
			Gm14458
			Gm14511
			Gm15056
			Gm16381
			Gm16513
			Gm2016
			Gm2022
			Gm2027
			Gm20337
			Gm20939
			Gm21293
			Gm21304
			Gm21319
			Gm25500
			Gm2a
			Gm3258
			Gm3286
			Gm4027
			Gm428
			Gm4340
			Gm4567
			Gm4858
			Gm4971
			Gm5128
			Gm5634
			Gm5635
			Gm5662
			Gm6568
			Gm6763
			Gm6880
			Gm8300
			Gm8764
			Gm8994
			Gm9
			Gm9125
			Gm9895
			Gnpda1
			Gpatch4
			Gpkow
			Gpn3
			Gpr161
			Gpx7
			Grb2
			Grhl2
			Grwd1
			Gskip
			Gsto1
			Gt(ROSA)26Sor
			Gtf2h4
			Gtf2i
			Gtf3c4
			Gtf3c5
			Gtpbp3
			Guca1a
			H2-D1
			H2-Q10
			H2-Q6
			H2-Q7
			H2-Q8
			H2-Q9
			H2-T22
			H2-T9
			Hars
			Hars2
			Hba-a1
			Hccs
			Hcrt
			Hdac1
			Heatr3
			Hes1
			Hesx1
			Hexb
			Hic2
			Hinfp
			Hist1h2ae
			Hist1h2ag
			Hist1h2an
			Hist1h2ao
			Hist1h4d
			Hist1h4i
			Hist2h2ac
			Hmgcl
			Hmmr
			Hnrnpm
			Hotairm1
			Hsd17b14
			Hsd17b6
			Hspbp1
			Iah1
			Id1
			Id2
			Ier3
			Ifi35
			Ifitm1
			Impdh1
			Impdh2
			Ing4
			Ino80c
			Ints5
			Ipo11
			Ipo4
			Ipo7
			Isg20
			Itgb5
			Itpa
			Itpkc
			Jmy
			Kcnk6
			Kdm4c
			Kdm5b
			Khdrbs1
			Kif18b
			Klf16
			Klf4
			Klf5
			Klhdc4
			Klhl10
			Klhl11
			Klhl21
			Klrg2
			Knop1
			Kpna1
			Kpna6
			L2hgdh
			Lat2
			Lbhd1
			Lbx2
			Lctl
			Leng1
			Leng8
			Lgals3
			Lias
			Lima1
			Lmnb1
			Lmx1a
			LOC100502896
			Lpar6
			Lpcat3
			Lrrc58
			Lst1
			Lta
			Lysmd1
			Lysmd3
			Mafk
			Maged1
			Mak16
			Man2c1os
			Map2k3
			Map2k7
			Map3k3
			Mars2
			Mcl1
			Mcts2
			Mdp1
			Mesdc2
			Metap1
			Mettl2
			Mettl22
			Mfsd5
			Mfsd7c
			Mga
			Mgat2
			Mid1ip1
			Mir144
			Mir1896
			Mir1956
			Mir3064
			Mir338
			Mir451a
			Mir465b-2
			Mir465c-2
			Mir592
			Mir692-2
			Mir692-3
			Mir6956
			Mir704
			Mir7669
			Mir8098
			Mir883a
			Mns1
			Mpdu1
			Mpp1
			Mpv17
			Mrps34
			Msantd2
			Msrb1
			Msto1
			Mt1
			Mta2
			Mtch2
			Mthfr
			Mtrr
			Mybbp1a
			Myc
			Myg1
			Nabp1
			Nabp2
			Nanp
			Narfl
			Ncapd2
			Ncbp1
			Ncmap
			Ndrg3
			Necap1
			Necap2
			Nfatc3
			Nicn1
			Nipal1
			Nkiras2
			Nktr
			Nmb
			Nob1
			Nol11
			Nol9
			Nom1
			Nop16
			Nop2
			Npat
			Npl
			Nptx2
			Nr2c2
			Nr5a2
			Nsun5
			Nt5c3b
			Nucb2
			Nudt3
			Nudt4
			Nufip1
			Nupr1
			Obox3
			Obox6
			Ola1
			Oraov1
			Ormdl2
			Osbpl6
			Ovol2
			P4ha2
			Pabpc1
			Pak2
			Pank3
			Papolb
			Parp9
			Pced1b
			Pcgf5
			Pcsk1n
			Pcyt2
			Pdcd11
			Pds5a
			Pdxk
			Pdxp
			Pemt
			Pgam2
			Pgd
			Pgm3
			Phrf1
			Pi4k2a
			Pigh
			Pik3cb
			Pim3
			Pin1
			Pitpnb
			Pknox1
			Pla2g15
			Pla2g16
			Platr22
			Plcd4
			Plekhf2
			Plp2
			Pmm2
			Pmpca
			Pnldc1
			Poglut1
			Polr3c
			Polr3d
			Polr3e
			Polr3g
			Polr3h
			Ppat
			Ppcs
			Ppil1
			Ppm1g
			Ppp1r2
			Ppp1r8
			Ppp2cb
			Pprc1
			Pqlc1
			Pqlc2
			Pramef25
			Pramef6
			Pramel4
			Pramel5
			Pramel6
			Pramel7
			Prdx4
			Prelid2
			Prkcd
			Prmt5
			Prmt6
			Prosc
			Prpf4
			Prps1
			Prr11
			Prr19
			Prr5
			Prrg2
			Prss45
			Prss46
			Psat1
			Psmd13
			Ptp4a1
			Ptpn1
			Ptrh1
			Pum1
			Pus1
			Pwp1
			Rab10os
			Rab11b
			Rab19
			Rab20
			Rab26os
			Rab2b
			Rab33b
			Rab34
			Rab39
			Rab40c
			Rab43
			Rab5a
			Rabgef1
			Rad9a
			Rangap1
			Rarg
			Rasl10a
			Rassf8
			Rbbp6
			Rbm10
			Rbm14
			Rbm3os
			Rbmx
			Rbp7
			Rdm1
			Renbp
			Rfpl4b
			Rhof
			Rilpl2
			Rmnd5b
			Rnf11
			Rnf138rt1
			Rngtt
			Rnmtl1
			Rpl3l
			Rpp25
			Rpp40
			Rprd1b
			Rps27
			Rpusd3
			Rrp12
			Rrp7a
			Rrp9
			Rtn2
			Rusc1
			Safb
			Sapcd2
			Sat2
			Sco2
			Sdad1
			Sde2
			Sec14l1
			Sec23b
			Sec24a
			Sec61a2
			Sertad1
			Sesn1
			Sesn2
			Sgk1
			Sgpp1
			Shmt1
			Sigmar1
			Sike1
			Simc1
			Slc12a2
			Slc16a6
			Slc19a3
			Slc1a1
			Slc1a5
			Slc25a25
			Slc25a28
			Slc25a36
			Slc25a44
			Slc27a5
			Slc2a3
			Slc35e2
			Slc35e3
			Slc39a1
			Slc39a7
			Slc4a11
			Slc5a6
			Slco4c1
			Sltm
			Smad7
			Smarcc1
			Smek1
			Smg5
			Smyd5
			Snai1
			Snapc2
			Snhg12
			Snhg3
			Snhg4
			Snhg5
			Snhg7
			Snip1
			Snora43
			Snora52
			Snora68
			Snora81
			Snord11
			Snord16a
			Snord33
			Snord35a
			Snord38a
			Snord55
			Snord67
			Snord8
			Snord91a
			Snord92
			Snrnp35
			Socs2
			Sord
			Sp140
			Sp2
			Sp3
			Spata2
			Spdye4b
			Spic
			Spink2
			Spns1
			Sppl3
			Spry2
			Spryd4
			Spsb3
			Spz1
			Sqle
			Srpr
			Srsf6
			Ssc4d
			Stac2
			Stk19
			Stk40
			Stmn3
			Sugp1
			Sult2b1
			Surf6
			Suv420h1
			Syap1
			Syncrip
			Syngr1
			Taf4b
			Tasp1
			Tatdn2
			Tbl2
			Tbl3
			Tbxa2r
			Tceb3
			Tchp
			Tdpoz1
			Tdpoz2
			Tdpoz4
			Tdpoz5
			Tes
			Tex101
			Tfrc
			Tgoln1
			Tgoln2
			Tgs1
			Thop1
			Timm22
			Tlcd2
			Tmed4
			Tmed6
			Tmem159
			Tmem160
			Tmem170
			Tmem223
			Tmem229b
			Tmem234
			Tmem254b
			Tmem79
			Tmem92
			Tmppe
			Tmsb15b1
			Tmsb4x
			Tmx1
			Tnfaip8l2
			Tnfrsf12a
			Tnfsf12
			Tnpo3
			Toe1
			Tor1aip2
			Tor1b
			Tprkb
			Traf2
			Trap1a
			Trib3
			Trim43a
			Trim43c
			Trip13
			Trmt10a
			Trmt61a
			Trub2
			Tsen2
			Tsen54
			Tslp
			Tspan4
			Tspyl2
			Tsr2
			Tsx
			Tti2
			Ttyh2
			Tuft1
			Uap1l1
			Ubtd1
			Ubtd2
			Ubtf
			Ubtfl1
			Ubxn7
			Ubxn8
			Ulk1
			Umps
			Unc119b
			Upk1a
			Uqcc3
			Urm1
			Usf1
			Usp17lc
			Usp17ld
			Usp17le
			Usp29
			Usp36
			Utp14b
			Utp23
			Vhl
			Vimp
			Vps37b
			Wbscr22
			Wdr18
			Wdr3
			Wdr4
			Wdr44
			Wdr45b
			Wdr46
			Wdr55
			Wdr77
			Wdr81
			Wdtc1
			Wdyhv1
			Wibg
			Wipi2
			Wrap53
			Wwtr1
			Xpnpep1
			Xylb
			Yars
			Yeats2
			Yy1
			Zbtb17
			Zbtb5
			Zbtb8a
			Zc3h12a
			Zc3hc1
			Zfp239
			Zfp263
			Zfp317
			Zfp346
			Zfp352
			Zfp367
			Zfp54
			Zfp566
			Zfp599
			Zfp617
			Zfp622
			Zfp623
			Zfp637
			Zfp644
			Zfp647
			Zfp7
			Zfp707
			Zfp775
			Zfp809
			Zfp810
			Zfp825
			Zfp874b
			Zfp949
			Zfx
			Zgpat
			Zscan4b
			Zscan5b
			Zyg11a
			AK010878
			Aprt
			Bzw1
			Ccdc25
			Ccne1
			Cd320
			Cdk2ap1
			Cggbp1
			Clpp
			Ctsb
			D230025D16Rik
			Dnajb9
			Dppa4
			Eci1
			Eef2
			Fbxo15
			Fem1c
			Fth1
			Ftl1
			G3bp1
			Gde1
			Gm10662
			Gm11974
			Gm16367
			Gm3139
			Gm6902
			Gpank1
			Gpd1l
			H2afz
			Hiat1
			Hmbs
			Hmgb3
			Kctd20
			Kti12
			Lamp2
			Larp1b
			Lars2
			Lsg1
			Lsm8
			Mad2l1bp
			Map1lc3a
			Map1lc3b
			Mat2a
			Mkrn1
			Mrpl20
			Mrps11
			Mrps26
			Nhp2
			Nr2c2ap
			Ntmt1
			Nudt21
			Pabpn1
			Pgam1
			Pglyrp1
			Pmm1
			Polr1c
			Polr1e
			Polr2h
			Ppm1a
			Prps1l3
			Prr13
			Prr23a1
			Psmd7
			Rbmx2
			Rhebl1
			Rnf125
			Rnf7
			Rpl10l
			Rpl9
			Rplp0
			Ruvbl1
			Sac3d1
			Sebox
			Serp1
			Sgta
			Ska2
			Snora21
			Snrpa
			Snrpb
			Snrpc
			Ssr2
			Tfb2m
			Tfg
			Tigar
			Timm10
			Tiprl
			Tmem120a
			Tmem41b
			Tomm20
			Tpm3
			Twistnb
			Ubl7
			Uqcrc1
			Uspl1
			Wdr74
			Wsb1
			Znhit3
