# Supplementary material
Source: Research Square preprint supplement (doi:10.21203/rs.3.rs-7771199/v1)
Supplement: Supplementary file 12 [file 940580f0bd275f3373ce317c.xlsx]

## Sheet: major ZGA list
List of monkey major ZGA genes
ACER2
ACTG2
AFMID
AIF1L
AKAP12
AKAP8
ALG5
ANGPTL4
ANKRD13C
ANKRD35
ANKRD40
ANKZF1
APOA2
ARGFX
ARGLU1
ARL10
ARL9
ASL
ASNA1
ATG2A
ATP1A3
BAG4
BAK1
BASP1
BECN2
BEX2
BIK
C11H12orf50
C11H12orf76
C14H11orf71
C15H9orf64
C16H17orf100
C16H17orf58
C19H19orf73
C1D
C4H6orf226
C5AR2
CACNB3
CBLC
CCDC126
CCDC28B
CCDC32
CCDC61
CCDC85B
CCL2
CCL25
CCNA1
CCNC
CCR8
CCT7
CD14
CD46
CDC23
CDK4
CDKN2AIP
CDR1
CEP85L
CERS5
CGA
CGAS
CHCHD5
CHMP1A
CHORDC1
CHRNB1
CITED1
CLDN6
CLN3
CLP1
CNEP1R1
CNFN
CNKSR3
COX7B2
CPA2
CPHXL
CRISP1
CRLF3
CSKMT
CST2
CST3
CTH
CUL2
CXADR
CXHXorf56
DAB2
DDAH2
DDX21
DDX3Y
DENND2C
DENR
DHDH
DHRS7
DHX9
DIS3
DLK2
DNAAF3
DNAJC30
DNASE1L2
DNMT3L
DNPH1
DPH2
DPH7
DPPA2
DPRX
DRAM1
DUS2
DUSP1
DUXA
E2F6
EFNA1
EIF2S3
EIF5A2
ELL3
EMC9
EMP2
EMP3
FABP6
FAM151A
FAM200B
FAM214B
FBXL12
FCF1
FEM1B
FLT3LG
FMR1NB
FOS
FRMD4B
GADD45B
GALM
GALP
GAST
GATC
GCAT
GCK
GIP
GNB4
GNRH1
GPATCH3
GPATCH4
GPR157
GRWD1
GSC
GTPBP3
GTPBP4
HBA
HBA1
HDHD5
HEY1
HIPK3
HIST1H1B
HIST1H1T
HIST1H2AA
HIST1H2AD
HIST1H2AJ
HIST1H2AK
HIST1H2BH
HIST2H2AC
HJV
HK2
HMG20B
HMOX1
HNRNPCL1
HNRNPL
HPDL
HSD17B14
HSPA2
HYAL1
ICAM3
IER3
IFI30
IGFLR1
IKZF5
IMPDH1
ING1
ISG15
ISG20L2
ITFG2
KAT5
KCTD14
KDM5B
KEG06_p01
KEG06_p07
KEG06_p08
KEG06_p11
KEG06_t02
KEG06_t04
KEG06_t21
KHDC1
KHDC1L
KHDC4
KITLG
KLF10
KLF17
KLF18
KLF3
KLF5
KLHL11
KLHL21
KLHL22
KLRG2
KMT5A
KPTN
KRBOX1
KRT18
KRT8
KTI12
L1TD1
LBHD1
LCN6
LDHB
LEUTX
LIAS
LIN28A
LIN28B
LOC100423594
LOC100424340
LOC100424830
LOC100425407
LOC100425959
LOC100426639
LOC100426884
LOC100427058
LOC100427847
LOC100427957
LOC100428646
LOC100428653
LOC100428708
LOC100428886
LOC100429047
LOC100429133
LOC100429174
LOC100430605
LOC100430773
LOC106992382
LOC106993106
LOC106993339
LOC106993343
LOC106993705
LOC106993710
LOC106993965
LOC106994055
LOC106994057
LOC106994252
LOC106994612
LOC106994632
LOC106994764
LOC106994809
LOC106994912
LOC106994927
LOC106994967
LOC106994973
LOC106994988
LOC106995240
LOC106995568
LOC106995630
LOC106995639
LOC106995677
LOC106995708
LOC106995770
LOC106995824
LOC106996044
LOC106996153
LOC106996165
LOC106996277
LOC106996511
LOC106996730
LOC106996785
LOC106996814
LOC106996871
LOC106996966
LOC106997100
LOC106997252
LOC106997268
LOC106997292
LOC106997433
LOC106997516
LOC106997577
LOC106997738
LOC106997853
LOC106998081
LOC106998138
LOC106998506
LOC106998534
LOC106998587
LOC106998665
LOC106998738
LOC106998961
LOC106999058
LOC106999069
LOC106999265
LOC106999480
LOC106999670
LOC106999679
LOC106999787
LOC106999862
LOC107000063
LOC107000371
LOC107000921
LOC107000967
LOC114669767
LOC114669784
LOC114669785
LOC114669835
LOC114669843
LOC114669858
LOC114669872
LOC114669971
LOC114670139
LOC114670228
LOC114670544
LOC114670579
LOC114670680
LOC114670946
LOC114670951
LOC114671182
LOC114671195
LOC114671230
LOC114671243
LOC114671317
LOC114671393
LOC114671625
LOC114671901
LOC114672021
LOC114672504
LOC114672523
LOC114672527
LOC114672537
LOC114672538
LOC114673045
LOC114673155
LOC114673226
LOC114673304
LOC114673307
LOC114673310
LOC114673317
LOC114673345
LOC114673358
LOC114673616
LOC114674042
LOC114674112
LOC114674133
LOC114674161
LOC114674216
LOC114674229
LOC114674230
LOC114674248
LOC114674255
LOC114674328
LOC114674359
LOC114674437
LOC114674453
LOC114674472
LOC114674609
LOC114674636
LOC114674637
LOC114674638
LOC114674645
LOC114674647
LOC114674648
LOC114674649
LOC114674651
LOC114674653
LOC114674654
LOC114674656
LOC114674657
LOC114674659
LOC114674661
LOC114674676
LOC114674677
LOC114674730
LOC114674735
LOC114674748
LOC114674906
LOC114674954
LOC114674955
LOC114674994
LOC114675036
LOC114675042
LOC114675053
LOC114675055
LOC114675106
LOC114675108
LOC114675136
LOC114675170
LOC114675225
LOC114675341
LOC114675428
LOC114675441
LOC114675515
LOC114675588
LOC114675629
LOC114675630
LOC114675631
LOC114675632
LOC114675641
LOC114675642
LOC114675643
LOC114675644
LOC114675739
LOC114675740
LOC114675741
LOC114675743
LOC114675745
LOC114675746
LOC114675747
LOC114675820
LOC114675853
LOC114675854
LOC114675857
LOC114675858
LOC114675859
LOC114675860
LOC114675890
LOC114675916
LOC114675918
LOC114675925
LOC114676217
LOC114676439
LOC114676593
LOC114676594
LOC114676799
LOC114676867
LOC114676893
LOC114676959
LOC114676965
LOC114677232
LOC114677240
LOC114677242
LOC114677385
LOC114677470
LOC114677566
LOC114677579
LOC114677588
LOC114677663
LOC114677681
LOC114677726
LOC114677753
LOC114677884
LOC114678282
LOC114678302
LOC114678573
LOC114678582
LOC114679149
LOC114679157
LOC114679207
LOC114679526
LOC114679544
LOC114679652
LOC114679718
LOC114679853
LOC114679864
LOC114679923
LOC114679933
LOC114680002
LOC114680033
LOC114680234
LOC114680387
LOC114680422
LOC114680423
LOC693283
LOC693330
LOC693602
LOC693802
LOC693908
LOC693973
LOC694388
LOC694580
LOC694593
LOC694781
LOC694921
LOC695427
LOC695657
LOC696005
LOC696321
LOC696369
LOC696506
LOC696808
LOC696854
LOC696921
LOC696935
LOC696959
LOC697558
LOC697687
LOC698105
LOC698256
LOC698354
LOC699185
LOC699231
LOC699779
LOC700113
LOC700412
LOC700564
LOC700765
LOC701497
LOC701574
LOC701715
LOC702039
LOC702654
LOC703127
LOC703490
LOC703889
LOC704026
LOC704147
LOC704241
LOC704341
LOC705142
LOC705220
LOC705273
LOC705407
LOC705469
LOC705514
LOC705754
LOC706103
LOC706126
LOC706218
LOC706367
LOC706956
LOC707602
LOC708050
LOC708448
LOC708657
LOC708725
LOC708864
LOC709052
LOC709523
LOC709684
LOC711544
LOC711606
LOC711690
LOC711872
LOC712404
LOC713295
LOC713313
LOC715687
LOC715706
LOC715804
LOC715953
LOC715996
LOC716081
LOC716116
LOC717220
LOC717486
LOC718020
LOC718280
LOC718486
LOC718691
LOC718749
LOC719250
LOC719702
LOC719990
LOC720294
LOC720371
LOC720437
LOC720590
LOC720628
LOC720717
LOC721289
LOC721718
LOC722722
LOC722781
LOC722804
LOC722929
LOC735307
LRAT
LYPD2
LYSMD1
MACMULV1R-PS1038
MAGEA4
MAGEB1
MAGEB2
MAMSTR
MAMU-E
MAP7D1
MARCKSL1
MED1
METAP1
MFSD2A
MIR663-6
MIR6790
MIR7166
MOAP1
MOB3A
MPLKIP
MRLN
MRPS5
MTERF1
MVB12A
MYADM
MYC
NANOGNB
NEFL
NFKBIB
NIP7
NMRK2
NMT2
NMUR2
NOC2L
NOL11
NOP14
NRDC
NRF1
NRM
NSD1
NUAK2
NUPR1
OTUD6A
OVCA2
PAGE2B
PCDH9
PDE12
PHF23
PHLDA2
PHOSPHO1
PIGY
PIM1
PIMREG
PKN3
PLAC8
PLD2
PLEKHO2
PLK2
PLOD1
PLOD3
PLP2
PLS3
PLVAP
PNO1
PNRC1
POLR1C
POMC
PPAT
PPP1R14A
PRAMEF12
PRDM14
PRNP
PRORP
PRPF38B
PRPF4B
PRPH
PRR11
PUS3
PYCARD
PYURF
QTRT2
RAB11FIP1
RAB33B
RAF1
RBBP6
RBM19
RBM7
RCC1
RELL1
RFPL1
RFPL4B
RHOXF2
RIMKLB
RITA1
RNF138
RPL10L
RPL22L1
RPL7L1
RPP25
RPS4Y1
RPS4Y2
RPS6KB2
RPUSD2
RRP12
S100A14
S100A16
S100A6
S1PR5
SCPEP1
SDHAF1
SEPHS2
SERINC2
SEZ6L2
SFN
SGK1
SH3BGRL
SHBG
SHLD1
SIRT4
SLC11A1
SLC17A7
SLC1A6
SLC2A3
SLC2A4
SLC34A2
SLC51A
SLC5A6
SLC7A5
SLC8A2
SMIM10L1
SNAI1
SOX4
SPAG4
SPATA2L
SPHK1
SPINK7
SPRYD4
SPTY2D1
SRSF8
STAM
STYX
SURF6
TAF11
TAF1D
TBRG4
TCEA1
TCEAL9
TEX19
TFAM
TGS1
THEGL
THOC5
TKTL1
TMED5
TMEM102
TMEM92
TNFAIP8L1
TNFRSF12A
TNNI3
TOR1B
TPM2
TPRX1
TRA2A
TRAF4
TRAPPC3
TRIM14
TRIM52
TRNAA-UGC_2
TRNAE-CUC
TRNAE-CUC_1
TRNAG-GCC_1
TRNAG-GCC_9
TRNAK-CUU_2
TRNAK-CUU_3
TRNAK-CUU_6
TRNAK-CUU_8
TRNAQ-CUG_1
TRNAR-CCU_4
TRNAS-GCU
TRNAS-GCU_1
TRNAS-GCU_2
TRNAS-GCU_5
TRNAS-GCU_7
TRNAT-AGU
TSPO
TSR1
TTC27
TTLL10
TUBB
TUBB4A
TUBB4B
TUBB6
TXLNA
TXNRD1
TYROBP
UBTFL1
UBXN7
UCP2
UFSP1
USP18
USP29
UTP25
UTP3
UTP6
VMAC
VMO1
WBP1
WDR3
WDR55
WSB1
YOD1
ZBTB3
ZBTB8A
ZBTB8OS
ZFP36L1
ZFP42
ZFYVE1
ZIM3
ZNF114
ZNF157
ZNF217
ZNF280A
ZNF296
ZNF432
ZNF473
ZNF576
ZNF589
ZNF596
ZNF614
ZNF616
ZNF878
ZNHIT6
ZSCAN4
ZSCAN5A
ZSCAN5B
ZYG11A
ZYX
ABT1
ALDOA
AQP3
ARL4D
BZW1
BZW2
C14H11orf98
CDC37
COPZ1
EAF1
ELOB
ENO1
FAU
FUNDC1
GSTP1
H2AFZ
HIST1H2AC
HNRNPAB
HNRNPH1
ID3
KEG06_p04
KEG06_p13
KEG06_t20
KEG06_t22
LAP3
LDHA
LOC100429350
LOC106994869
LOC107000802
LOC114670676
LOC114670854
LOC114672333
LOC114672574
LOC114673297
LOC114675099
LOC114676571
LOC114676573
LOC114677671
LOC696463
LOC705507
LOC705636
LOC707924
LOC712661
LOC719232
MALSU1
MRPL49
NOCT
NONO
NOSIP
NRBF2
PDCL3
PGAM1
PPA1
PRR13
PTMA
PTP4A1
RBM8A
RBMX
RBP7
RFPL4A
RNF11
RPL39
S100A10
SCNM1
SESN2
SLC3A2
SNRPB
SNUPN
SRSF2
SRSF3
TFRC
TIMM8A
TMSB10
WDR45
ZNF121

## Sheet: C1-C4 gene list
List of ZGA genes with different expression patterns
C1	C2	C3	C4
ABT1	ABT1	APOA2	AKAP12
AFMID	ACER2	ATP1A3	ARL10
AIF1L	ACTG2	C16H17orf100	ARL9
ANGPTL4	AIF1L	C19H19orf73	BASP1
ANKRD13C	AKAP8	C4H6orf226	BEX2
ANKRD35	ALDOA	C5AR2	C11H12orf76
ANKRD40	ALG5	CCDC28B	CBLC
ARGFX	ANKZF1	CCDC61	CCNA1
ARGLU1	AQP3	CCL2	CD46
ARL4D	ARGFX	CCL25	CDKN2AIP
ASNA1	ASL	CCR8	CLDN6
BAG4	ASNA1	CDR1	CLP1
BECN2	ATG2A	CITED1	CPA2
BIK	BAG4	CNFN	CPHXL
BZW1	BAK1	CST2	DENND2C
BZW2	BECN2	CST3	DHDH
C11H12orf50	BZW1	DDAH2	DNASE1L2
C14H11orf71	BZW2	DLK2	ELL3
C14H11orf98	C14H11orf98	DNAAF3	FBXL12
C15H9orf64	C16H17orf58	EFNA1	FEM1B
C16H17orf58	C1D	FABP6	GCK
C1D	CACNB3	FLT3LG	GNRH1
C4H6orf226	CCNC	FOS	GPR157
CACNB3	CCT7	GADD45B	HIST1H1T
CCDC126	CD14	GALP	HIST1H2AJ
CCDC28B	CDC23	GAST	HIST1H2AK
CCDC32	CDC37	GSC	HMG20B
CCDC61	CDK4	HIST1H2AA	HSPA2
CCDC85B	CEP85L	HIST1H2AD	ICAM3
CDC23	CERS5	HIST1H2BH	IFI30
CDK4	CHCHD5	HJV	KEG06_p01
CERS5	CHMP1A	HNRNPCL1	KEG06_p07
CGA	CHORDC1	IER3	KEG06_p08
CGAS	CLN3	ING1	KEG06_p11
CHRNB1	CNEP1R1	ISG15	KEG06_t02
CITED1	CNKSR3	KCTD14	KEG06_t04
CRLF3	COPZ1	KLF18	KEG06_t21
CSKMT	COX7B2	LCN6	KHDC4
CTH	CRISP1	LEUTX	KLF10
DAB2	CRLF3	LOC100423594	KLF17
DDAH2	CUL2	LOC100424830	KLHL21
DENR	CXADR	LOC100425959	KLHL22
DHX9	CXHXorf56	LOC100427847	KRT8
DIS3	DAB2	LOC100428653	LBHD1
DLK2	DDX21	LOC100428708	LOC100427957
DNAJC30	DDX3Y	LOC100428886	LOC106993710
DPRX	DENR	LOC100429047	LOC106994055
DUS2	DHRS7	LOC100429174	LOC106994988
DUSP1	DHX9	LOC100430773	LOC106995770
DUXA	DIS3	LOC106992382	LOC106995824
E2F6	DNMT3L	LOC106993343	LOC106996511
EAF1	DNPH1	LOC106993705	LOC106997100
EFNA1	DPH2	LOC106994612	LOC106997252
EIF5A2	DPH7	LOC106994632	LOC106997292
ELOB	DPPA2	LOC106994764	LOC106997577
EMP3	DRAM1	LOC106994809	LOC106997738
FAM200B	E2F6	LOC106994869	LOC106998081
FAU	EAF1	LOC106995630	LOC106998506
FMR1NB	EIF2S3	LOC106995639	LOC106998665
FUNDC1	ELOB	LOC106995677	LOC114669784
GADD45B	EMC9	LOC106995708	LOC114669835
GALP	EMP2	LOC106996153	LOC114669858
GATC	ENO1	LOC106996277	LOC114669971
GIP	FAM151A	LOC106996730	LOC114670680
GPATCH3	FAM214B	LOC106996871	LOC114671195
GRWD1	FCF1	LOC106998587	LOC114671317
GSC	FMR1NB	LOC106998738	LOC114671625
GTPBP3	FRMD4B	LOC106998961	LOC114672504
GTPBP4	FUNDC1	LOC106999058	LOC114672523
H2AFZ	GALM	LOC106999069	LOC114672538
HBA	GATC	LOC106999670	LOC114673304
HBA1	GCAT	LOC106999679	LOC114673307
HEY1	GNB4	LOC106999787	LOC114673345
HIPK3	GPATCH4	LOC107000967	LOC114673616
HIST1H2BH	GRWD1	LOC114669767	LOC114674248
HIST2H2AC	GTPBP3	LOC114670139	LOC114674255
HJV	GTPBP4	LOC114670228	LOC114674328
HMOX1	HDHD5	LOC114670544	LOC114674472
HNRNPH1	HIST1H1B	LOC114670579	LOC114674645
HPDL	HK2	LOC114670676	LOC114675053
HYAL1	HNRNPH1	LOC114670854	LOC114675106
ID3	HNRNPL	LOC114671182	LOC114675136
IGFLR1	HPDL	LOC114671230	LOC114675225
IKZF5	HSD17B14	LOC114671243	LOC114675341
ISG15	HYAL1	LOC114671393	LOC114675588
KAT5	IKZF5	LOC114671901	LOC114675630
KCTD14	IMPDH1	LOC114672021	LOC114676439
KHDC1	ISG20L2	LOC114672333	LOC114676867
KHDC1L	ITFG2	LOC114672527	LOC114676893
KLF3	KDM5B	LOC114672537	LOC114677232
KLHL11	KITLG	LOC114673045	LOC114677240
KMT5A	KLF5	LOC114673155	LOC114677588
KPTN	KLRG2	LOC114673226	LOC114678282
KRT18	KRBOX1	LOC114673310	LOC114678573
KTI12	KRT18	LOC114673317	LOC114678582
L1TD1	KTI12	LOC114673358	LOC114679149
LAP3	L1TD1	LOC114674042	LOC114679157
LCN6	LAP3	LOC114674133	LOC114679526
LDHA	LDHA	LOC114674161	LOC114679544
LEUTX	LDHB	LOC114674216	LOC114679923
LIAS	LIAS	LOC114674229	LOC114680002
LOC100424830	LIN28A	LOC114674230	LOC694921
LOC100425959	LIN28B	LOC114674359	LOC695657
LOC100426884	LOC100424340	LOC114674609	LOC699185
LOC100427058	LOC100425407	LOC114674636	LOC699231
LOC100428646	LOC100426639	LOC114674637	LOC700564
LOC100428653	LOC100426884	LOC114674638	LOC704241
LOC100429174	LOC100427058	LOC114674647	LOC705220
LOC100429350	LOC100429133	LOC114674648	LOC705407
LOC106992382	LOC100430605	LOC114674649	LOC706367
LOC106993106	LOC106994252	LOC114674651	LOC709684
LOC106993339	LOC106994967	LOC114674653	LOC711544
LOC106993343	LOC106996044	LOC114674654	LOC712404
LOC106993965	LOC106996165	LOC114674656	LOC715687
LOC106994057	LOC106996814	LOC114674657	LOC715804
LOC106994632	LOC106997433	LOC114674659	LOC716116
LOC106994809	LOC106998138	LOC114674661	LOC717486
LOC106994912	LOC106998534	LOC114674676	LOC718020
LOC106994927	LOC106999480	LOC114674677	LOC720437
LOC106994973	LOC107000371	LOC114674735	LOC721718
LOC106995240	LOC114669785	LOC114674906	LOC722722
LOC106995568	LOC114669843	LOC114675036	LYSMD1
LOC106995630	LOC114670951	LOC114675042	MAGEA4
LOC106996785	LOC114674453	LOC114675055	MAP7D1
LOC106996966	LOC114674730	LOC114675099	MARCKSL1
LOC106997268	LOC114674954	LOC114675108	MED1
LOC106997516	LOC114674955	LOC114675170	MIR663-6
LOC106997853	LOC114674994	LOC114675428	MIR6790
LOC106998587	LOC114675515	LOC114675441	MIR7166
LOC106998738	LOC114676959	LOC114675629	MOB3A
LOC106999058	LOC114676965	LOC114675631	MYADM
LOC106999265	LOC114677470	LOC114675632	NMRK2
LOC106999862	LOC114677566	LOC114675641	NRDC
LOC107000063	LOC114677579	LOC114675642	NRF1
LOC107000921	LOC114677753	LOC114675643	NSD1
LOC114669872	LOC114680234	LOC114675644	PDE12
LOC114670228	LOC693330	LOC114675739	PHF23
LOC114670544	LOC693802	LOC114675740	PHOSPHO1
LOC114670676	LOC694388	LOC114675741	PLOD1
LOC114670854	LOC694593	LOC114675743	PLVAP
LOC114670946	LOC696369	LOC114675745	PNRC1
LOC114670951	LOC696854	LOC114675746	POMC
LOC114671393	LOC696935	LOC114675747	PRPF4B
LOC114672333	LOC696959	LOC114675820	RAB11FIP1
LOC114673297	LOC697687	LOC114675853	RAB33B
LOC114674112	LOC698256	LOC114675854	RCC1
LOC114674133	LOC698354	LOC114675857	RFPL1
LOC114674161	LOC699779	LOC114675858	RPL10L
LOC114674359	LOC700113	LOC114675859	RPP25
LOC114674437	LOC701497	LOC114675860	SEPHS2
LOC114674648	LOC701715	LOC114675890	SFN
LOC114674748	LOC702654	LOC114675916	SHLD1
LOC114675099	LOC703127	LOC114675918	SIRT4
LOC114675890	LOC703490	LOC114675925	SLC11A1
LOC114676217	LOC704147	LOC114676217	SLC2A3
LOC114676571	LOC705636	LOC114676573	SLC34A2
LOC114676573	LOC706103	LOC114676799	SLC7A5
LOC114676593	LOC706218	LOC114677726	SNAI1
LOC114676594	LOC707924	LOC114677884	SPAG4
LOC114676799	LOC708657	LOC114679207	SPATA2L
LOC114677242	LOC709052	LOC114679718	SPHK1
LOC114677385	LOC712661	LOC114679853	SPRYD4
LOC114677566	LOC713313	LOC114679864	SPTY2D1
LOC114677579	LOC715996	LOC114679933	STYX
LOC114677663	LOC716081	LOC114680033	TKTL1
LOC114677681	LOC718486	LOC114680387	TMED5
LOC114678302	LOC719232	LOC114680422	TMEM102
LOC114679652	LOC719250	LOC114680423	TNFAIP8L1
LOC114679853	LOC720628	LOC693283	TNNI3
LOC114680234	LOC721289	LOC693602	TPM2
LOC114680387	LOC722804	LOC693908	TPRX1
LOC694388	MACMULV1R-PS1038	LOC693973	TRIM52
LOC694580	MAGEB1	LOC694781	TRNAA-UGC_2
LOC694781	MAGEB2	LOC695427	TRNAE-CUC
LOC696005	MALSU1	LOC696463	TRNAE-CUC_1
LOC696321	METAP1	LOC696808	TRNAG-GCC_1
LOC696463	MFSD2A	LOC696921	TRNAG-GCC_9
LOC696506	MOAP1	LOC698105	TRNAK-CUU_2
LOC696959	MPLKIP	LOC700412	TRNAK-CUU_3
LOC697558	MRLN	LOC700765	TRNAK-CUU_6
LOC698256	MRPL49	LOC701574	TRNAK-CUU_8
LOC699779	MRPS5	LOC702039	TRNAQ-CUG_1
LOC701497	MTERF1	LOC704026	TRNAR-CCU_4
LOC703889	MVB12A	LOC704341	TRNAS-GCU
LOC704026	NEFL	LOC705142	TRNAS-GCU_1
LOC704147	NFKBIB	LOC705273	TRNAS-GCU_2
LOC705514	NIP7	LOC705469	TRNAS-GCU_5
LOC705636	NOC2L	LOC705507	TRNAS-GCU_7
LOC706126	NOCT	LOC705514	TRNAT-AGU
LOC706956	NOL11	LOC705754	TSPO
LOC707602	NONO	LOC708050	TUBB4B
LOC707924	NOP14	LOC708448	TXLNA
LOC708725	NRBF2	LOC708725	UBXN7
LOC709523	OTUD6A	LOC708864	UCP2
LOC711606	PAGE2B	LOC711690	UFSP1
LOC711872	PDCL3	LOC711872	USP18
LOC712661	PGAM1	LOC715706	USP29
LOC713295	PIGY	LOC715953	VMO1
LOC715996	PIM1	LOC718280	WBP1
LOC717220	PKN3	LOC718691	ZNF157
LOC718280	PLD2	LOC718749	ZNF217
LOC718691	PLOD3	LOC720294	ZNF280A
LOC719250	PLS3	LOC720371	ZNF296
LOC719702	PNO1	LOC720590	ZNF589
LOC719990	POLR1C	LOC735307	ZNF614
LOC720717	PPA1	LRAT	ZSCAN4
LOC721289	PPAT	LYPD2	ZSCAN5A
LOC722781	PPP1R14A	MAMSTR	ZSCAN5B
LOC722804	PRDM14	NMUR2	GSTP1
LOC722929	PRNP	NRM	HIST1H2AC
MALSU1	PRORP	NUAK2	HNRNPAB
MAMU-E	PRR11	NUPR1	KEG06_p04
MRLN	PTP4A1	PCDH9	KEG06_p13
MRPL49	PUS3	PLAC8	KEG06_t20
MTERF1	PYURF	PLEKHO2	KEG06_t22
MYC	QTRT2	PLK2	LOC107000802
NANOGNB	RAF1	PLP2	LOC114672574
NFKBIB	RBM19	PRAMEF12	LOC114677671
NIP7	RBM7	PRPH	NOSIP
NMT2	RBM8A	PYCARD	PRR13
NOCT	RBP7	RBBP6	RBMX
NOL11	RIMKLB	RFPL4A	SCNM1
NRBF2	RNF11	RFPL4B
NUPR1	RNF138	S100A10
OVCA2	RPL22L1	S100A14
PCDH9	RPL39	S100A6
PDCL3	RPL7L1	SERINC2
PHLDA2	RPS4Y1	SEZ6L2
PIMREG	RPS4Y2	SH3BGRL
PLEKHO2	RPS6KB2	SHBG
PNO1	RPUSD2	SLC2A4
POLR1C	RRP12	SLC8A2
PPA1	S1PR5	SPINK7
PPAT	SCPEP1	THEGL
PRPF38B	SESN2	TTLL10
PRPH	SGK1	UBTFL1
PTMA	SLC17A7	VMAC
PTP4A1	SLC3A2
RBM7	SLC5A6
RBM8A	SMIM10L1
RELL1	SNRPB
RFPL4A	SOX4
RHOXF2	SRSF2
RIMKLB	SRSF3
RITA1	SURF6
RNF138	TAF11
RPL39	TAF1D
RPL7L1	TBRG4
RPUSD2	TCEA1
S100A14	TCEAL9
S100A16	TEX19
S100A6	TFAM
SDHAF1	TFRC
SH3BGRL	TGS1
SLC17A7	THOC5
SLC1A6	TMEM92
SLC3A2	TRA2A
SLC51A	TRAF4
SLC5A6	TRAPPC3
SLC8A2	TRIM14
SNRPB	TSR1
SNUPN	TTC27
SOX4	TUBB
SPINK7	TUBB4A
SRSF2	TUBB6
SRSF3	TXNRD1
SRSF8	TYROBP
STAM	UTP25
TAF11	UTP3
TCEA1	UTP6
TCEAL9	WDR3
TFAM	WDR45
TIMM8A	WDR55
TMSB10	WSB1
TNFRSF12A	YOD1
TOR1B	ZBTB8A
TRA2A	ZBTB8OS
TUBB	ZIM3
TUBB6	ZNF473
UTP3	ZNF576
UTP6	ZYG11A
WSB1	ZYX
YOD1
ZBTB3
ZBTB8OS
ZFP36L1
ZFP42
ZFYVE1
ZIM3
ZNF114
ZNF121
ZNF432
ZNF473
ZNF596
ZNF616
ZNF878
ZNHIT6
ZYG11A
