# Supplementary material
Source: Research Square preprint supplement (doi:10.21203/rs.3.rs-7771199/v1)
Supplement: Supplementary file 13 [file b22d9793a7f7cdc1d9518237.xlsx]

## Sheet: DEG in OGV vs YGV
Differentially expressed genes in OGV vs YGV
Gene symbol	P-value	Log2FoldChange	Adjusted P-value	Status
ACSL3	1.04054e-06	1.04725	0.030109	up
ACTR6	2.58074e-07	1.03208	0.00746763	up
ADAD1	2.40056e-10	1.14025	6.94625e-06	up
ADGRG7	1.00796e-10	1.15079	2.91662e-06	up
ADORA2B	3.20589e-07	1.73229	0.00927655	up
ANKRD46	5.05081e-09	1.10466	0.00014615	up
ANXA7	5.08201e-08	1.02623	0.00147053	up
AP5M1	2.51232e-08	1.02056	0.000726966	up
ARMC1	6.34507e-09	1.46763	0.000183601	up
ASF1A	1.50662e-06	1.0534	0.0435956	up
ATF7IP2	2.0211e-09	1.24512	5.84827e-05	up
ATG3	1.15791e-06	1.11949	0.0335053	up
ATP6V1B2	8.65851e-08	1.02139	0.00250543	up
AURKA	3.43176e-09	1.00731	9.93013e-05	up
BICC1	7.6369e-09	1.73919	0.000220981	up
BIRC2	7.94055e-08	1.10336	0.00229768	up
BRDT	2.24876e-07	1.24953	0.006507	up
BTBD10	4.69779e-10	1.21626	1.35935e-05	up
CCNB1	7.65673e-08	1.31072	0.00221555	up
CCNB3	3.06046e-08	1.1216	0.000885573	up
CD164	1.52972e-12	1.26989	4.42639e-08	up
CENPK	3.43067e-08	1.15313	0.000992698	up
CNN3	9.81098e-08	1.389	0.00283891	up
COG5	4.95095e-09	1.02179	0.000143261	up
COQ10B	9.2508e-10	1.61487	2.67681e-05	up
CTNNA1	4.90344e-09	1.10838	0.000141886	up
CYP2C9	9.57275e-07	1.01468	0.0276997	up
DCK	4.31448e-09	1.37437	0.000124844	up
DCLRE1A	2.19184e-08	1.08384	0.000634231	up
DCLRE1C	9.06413e-10	1.09172	2.6228e-05	up
DCUN1D4	5.30202e-07	1.29675	0.0153419	up
DEPDC7	1.42841e-07	1.1923	0.00413324	up
DNAJB1	1.45989e-07	1.00847	0.00422435	up
EDRF1	5.04329e-08	1.4428	0.00145933	up
EIF2A	3.08963e-07	1.11851	0.00894016	up
EIF4G2	1.78546e-07	1.18275	0.00516641	up
EML6	8.40676e-07	1.07733	0.0243258	up
ERBB4	4.27887e-07	1.20266	0.0123813	up
FAM49B	3.83144e-09	1.38816	0.000110866	up
FASTKD1	4.72058e-11	1.04427	1.36595e-06	up
FBXL5	2.47528e-09	1.16798	7.16248e-05	up
FBXO30	5.76782e-08	1.42199	0.00166898	up
FBXO34	2.11437e-07	1.31266	0.00611815	up
FPGT	2.88068e-09	1.12949	8.33554e-05	up
GABPA	1.30225e-06	1.0294	0.037682	up
GMFB	2.23242e-08	1.51982	0.000645974	up
GOLT1B	1.62644e-08	1.11205	0.000470627	up
GPBP1	5.60566e-10	1.04848	1.62206e-05	up
HBP1	1.48617e-09	1.12151	4.30038e-05	up
HIBADH	1.29972e-06	1.06716	0.0376086	up
HNRNPF	8.57032e-08	1.05081	0.00247991	up
HSD17B12	4.35074e-09	1.16305	0.000125893	up
IFRD1	3.3612e-09	1.96027	9.72598e-05	up
IQCB1	4.72457e-08	1.09824	0.0013671	up
IRF8	6.09095e-07	1.27534	0.0176248	up
KLHL3	3.17745e-08	1.43386	0.000919427	up
LAPTM4A	2.66719e-07	1.17444	0.00771777	up
LOC100499560	2.13812e-12	1.16509	6.18685e-08	up
LOC106994869	5.42383e-07	1.55748	0.0156944	up
LOC106995121	4.48357e-15	1.71649	1.29737e-10	up
LOC114675313	6.37058e-07	1.55039	0.0184339	up
LOC114678757	2.73583e-13	1.304	7.9164e-09	up
LOC114678848	1.5669e-08	1.18083	0.000453399	up
LOC114680207	5.88317e-11	1.6632	1.70235e-06	up
LOC114680244	2.76175e-11	1.24411	7.9914e-07	up
LOC696610	1.94691e-12	2.93102	5.63357e-08	up
LOC699342	6.36028e-07	1.17232	0.0184041	up
LOC700564	1.0734e-07	1.28337	0.00310599	up
LOC704010	1.18179e-09	1.43191	3.41962e-05	up
LOC706715	6.38357e-11	2.12407	1.84715e-06	up
LRRC17	5.63934e-08	1.06093	0.0016318	up
LRRC40	2.44574e-12	1.69512	7.07699e-08	up
LTV1	1.51083e-08	1.13474	0.000437173	up
MAD2L1	1.08333e-08	1.2363	0.000313472	up
MAP3K7CL	1.5694e-07	1.29727	0.00454122	up
MELK	6.41424e-08	1.315	0.00185602	up
MINPP1	3.71683e-08	1.11613	0.0010755	up
MMUT	6.20995e-07	1.09892	0.0179691	up
MTERF3	5.37374e-08	1.18747	0.00155495	up
NEDD1	8.82716e-11	1.50495	2.55423e-06	up
NEIL3	1.24698e-06	1.55373	0.0360826	up
NEK2	7.89426e-09	1.00543	0.000228428	up
NHLRC3	1.19391e-09	1.06322	3.45469e-05	up
NIPA2	7.54404e-08	1.08199	0.00218294	up
NLRP14	9.2603e-08	1.28077	0.00267956	up
NMD3	9.19364e-09	1.22568	0.000266027	up
NOP2	2.26444e-08	1.03296	0.000655239	up
NPL	7.26388e-10	1.08669	2.10188e-05	up
NUP88	1.62284e-09	1.36467	4.69586e-05	up
NXT2	6.61448e-08	1.29286	0.00191397	up
PDCL	5.26176e-07	1.18545	0.0152254	up
PDHX	1.59911e-09	1.18938	4.62719e-05	up
PDK1	1.57609e-07	1.47373	0.00456057	up
PPHLN1	6.65978e-08	1.06498	0.00192707	up
PSMD1	3.68372e-10	1.1664	1.06592e-05	up
PTGES3	1.81784e-10	1.22928	5.2601e-06	up
RAP1B	2.96119e-10	1.01165	8.56848e-06	up
RBBP7	9.93599e-09	1.00247	0.000287508	up
RC3H1	2.56216e-07	1.30939	0.00741387	up
RPA1	1.24659e-10	1.15443	3.60712e-06	up
SCFD1	1.01905e-08	1.05894	0.000294873	up
SDCBP	9.36005e-08	1.31121	0.00270842	up
SEC23B	4.4409e-07	1.06702	0.0128502	up
SET	1.31161e-06	1.14502	0.0379526	up
SKP2	1.0223e-06	1.11606	0.0295814	up
SLC19A2	5.69584e-07	1.21879	0.0164815	up
SPCS2	3.96117e-07	1.12694	0.011462	up
SPDL1	1.17521e-09	1.01862	3.40058e-05	up
STRAP	4.40627e-09	1.32179	0.0001275	up
STXBP3	6.63058e-09	1.03314	0.000191862	up
SUCLA2	4.09106e-07	1.15931	0.0118379	up
TFG	2.68955e-08	1.08203	0.000778249	up
TMED2	6.96117e-10	1.4315	2.01428e-05	up
TMEM199	2.48537e-14	1.04122	7.19167e-10	up
TNFAIP8	2.64548e-09	1.34428	7.65495e-05	up
TPD52	4.46609e-07	1.19257	0.0129231	up
TTK	7.37782e-10	1.24019	2.13485e-05	up
TUBE1	1.34777e-09	1.0541	3.89991e-05	up
UBAP2L	4.76361e-08	1.00607	0.0013784	up
UBE2A	1.3928e-06	1.16813	0.0403021	up
UBE2G1	2.81109e-08	1.07615	0.000813417	up
UBE2Q2	1.90005e-09	1.39336	5.49799e-05	up
UBTD2	2.06137e-07	1.49855	0.00596479	up
VAPA	6.53759e-09	1.18968	0.000189172	up
WRB	1.73945e-09	1.24193	5.03327e-05	up
YPEL5	1.76644e-07	1.09157	0.00511137	up
YWHAQ	8.12459e-13	1.4344	2.35093e-08	up
ZBTB33	1.91223e-08	1.00504	0.000553323	up
ZFAND6	1.62883e-08	1.05373	0.000471318	up
ZNF211	7.97528e-10	1.39794	2.30773e-05	up
ZNF22	2.49959e-07	1.07582	0.0072328	up
ZNF256	9.61791e-10	1.28356	2.78304e-05	up
ZNF420	9.41613e-11	1.8971	2.72465e-06	up
ZNF552	5.17504e-07	1.40707	0.0149745	up
ZNF766	4.23077e-08	1.16322	0.00122422	up
AAMDC	1.56764e-06	-1.56927	0.0453611	down
ABCA3	3.279e-12	-1.28914	9.4881e-08	down
ABHD17A	1.80322e-09	-1.40182	5.21778e-05	down
ABHD6	3.46297e-13	-1.50396	1.00205e-08	down
ABR	3.8274e-07	-1.16248	0.011075	down
ABTB1	6.5191e-12	-1.36764	1.88637e-07	down
ACADS	6.19999e-08	-1.72565	0.00179403	down
ADAM28	9.44036e-15	-1.19906	2.73166e-10	down
ADCK2	3.92276e-09	-1.2801	0.000113509	down
ADGRG3	4.71701e-15	-1.39984	1.36491e-10	down
ADGRL1	4.8253e-09	-1.2869	0.000139625	down
ADM5	2.29966e-09	-1.3395	6.65429e-05	down
AGAP3	7.80321e-20	-1.4956	2.25794e-15	down
AGRP	4.95279e-16	-1.60432	1.43314e-11	down
AKAP17A	3.44141e-09	-1.38391	9.95807e-05	down
ALKBH7	4.54506e-10	-1.49337	1.31516e-05	down
AMIGO1	6.80531e-08	-1.23059	0.00196919	down
ANAPC11	9.56104e-11	-1.16266	2.76658e-06	down
ANKLE2	1.74717e-08	-1.0607	0.000505561	down
ANKRD11	1.78223e-11	-1.1822	5.15707e-07	down
ANKRD53	9.26624e-11	-1.51854	2.68128e-06	down
ANKS6	8.99495e-07	-1.32179	0.0260278	down
AP4M1	1.753e-08	-1.43803	0.000507249	down
APOC1	7.70256e-11	-1.72271	2.22881e-06	down
ARAP1	2.26176e-08	-1.19148	0.000654462	down
ARAP3	2.42833e-09	-1.15947	7.02661e-05	down
ARFRP1	2.46097e-08	-1.10469	0.000712107	down
ARHGAP10	8.36963e-10	-1.03464	2.42183e-05	down
ARHGAP27	1.16198e-11	-1.31188	3.36232e-07	down
ARHGAP39	1.93807e-15	-1.50071	5.608e-11	down
ARHGDIA	1.71417e-08	-1.07051	0.000496013	down
ARHGEF10L	9.19893e-07	-1.36526	0.026618	down
ARL4C	1.21402e-07	-1.07243	0.00351288	down
ARL6IP4	1.15552e-08	-1.39124	0.000334363	down
ARMC7	2.09536e-09	-1.21615	6.06313e-05	down
ARRDC2	9.71104e-08	-1.10781	0.00280999	down
ASB2	1.38136e-11	-1.29878	3.99709e-07	down
ASTL	9.99769e-07	-1.8669	0.0289293	down
ATF4	1.47383e-13	-1.94497	4.26468e-09	down
ATF5	2.21338e-24	-1.59082	6.40464e-20	down
ATG4D	6.92094e-09	-1.46187	0.000200264	down
ATG7	1.68467e-09	-1.28976	4.87476e-05	down
ATOX1	1.55449e-08	-1.2767	0.000449807	down
ATP5F1D	1.69651e-08	-1.5245	0.000490903	down
ATP5MC2	3.08641e-11	-1.02038	8.93085e-07	down
ATRIP	8.44879e-08	-1.23299	0.00244474	down
ATXN7	1.56711e-06	-1.18896	0.0453458	down
AURKAIP1	2.1421e-09	-1.65853	6.19837e-05	down
AXIN1	1.59886e-22	-1.51064	4.62646e-18	down
AZU1	1.18643e-18	-1.55915	3.43305e-14	down
B3GAT3	7.57659e-08	-1.36192	0.00219236	down
B4GALT2	4.64012e-13	-1.38913	1.34266e-08	down
BAHD1	1.88259e-07	-1.32505	0.00544746	down
BAIAP2L2	6.84993e-08	-1.18916	0.0019821	down
BAMBI	1.12356e-20	-1.75144	3.25113e-16	down
BAP1	1.09469e-11	-1.28832	3.1676e-07	down
BASP1	7.42091e-16	-1.52566	2.14732e-11	down
BAZ1B	3.16863e-09	-1.03165	9.16874e-05	down
BBC3	1.20685e-16	-1.72502	3.49214e-12	down
BCAS4	1.17408e-09	-1.35641	3.39731e-05	down
BCL2L11	2.45437e-11	-1.37612	7.10195e-07	down
BCR	2.72936e-14	-1.43536	7.89769e-10	down
BEAN1	9.63608e-09	-1.19826	0.00027883	down
BEX1	9.62729e-13	-1.53041	2.78575e-08	down
BEX3	2.60939e-10	-1.55489	7.55054e-06	down
BFSP2	1.1851e-07	-1.38375	0.0034292	down
BHLHE40	9.82831e-13	-1.27162	2.84392e-08	down
BIK	3.17206e-10	-1.60915	9.17868e-06	down
BLOC1S1	3.54444e-10	-1.42077	1.02562e-05	down
BOLA2B	7.23462e-10	-1.60713	2.09341e-05	down
BRD4	5.69053e-10	-1.25008	1.64661e-05	down
BRI3	1.83223e-07	-1.26168	0.00530173	down
BRI3BP	4.0589e-13	-1.25665	1.17448e-08	down
BTBD2	2.01348e-12	-1.38346	5.8262e-08	down
C11H12orf49	1.4488e-11	-1.20655	4.19225e-07	down
C11H12orf57	1.64659e-06	-1.28699	0.0476458	down
C14H11orf49	1.08158e-23	-1.89473	3.12967e-19	down
C15H9orf116	3.35037e-07	-1.13775	0.00969463	down
C15H9orf16	4.33086e-07	-1.29034	0.0125318	down
C16H17orf99	1.25873e-07	-1.29012	0.00364226	down
C19H19orf24	9.71967e-08	-1.49176	0.00281248	down
C19H19orf53	1.86793e-07	-1.29523	0.00540503	down
C1H1orf122	5.61921e-11	-1.42458	1.62597e-06	down
C1QL4	1.77574e-11	-1.42544	5.13827e-07	down
C2CD2L	5.74599e-07	-1.30331	0.0166266	down
C3H7orf26	1.21811e-13	-1.48679	3.52473e-09	down
C6orf125	4.33639e-08	-1.41746	0.00125478	down
CA5A	3.9503e-08	-1.25377	0.00114306	down
CABLES2	7.97836e-11	-1.27928	2.30862e-06	down
CACNA1A	1.7949e-10	-1.18491	5.19373e-06	down
CACNG7	1.5736e-06	-1.19916	0.0455337	down
CADPS	3.62607e-12	-1.274	1.04924e-07	down
CAMK1	7.05232e-07	-1.23167	0.0204066	down
CAMSAP3	3.89306e-24	-1.9486	1.1265e-19	down
CARHSP1	6.67116e-08	-1.13116	0.00193037	down
CARS2	2.02849e-23	-2.02696	5.86963e-19	down
CASKIN1	1.90914e-11	-1.39826	5.52428e-07	down
CASKIN2	1.43199e-07	-1.19484	0.00414361	down
CBFA2T3	7.73151e-07	-1.22947	0.0223719	down
CBY3	1.28324e-10	-1.40518	3.71318e-06	down
CC2D1A	2.712e-08	-1.29221	0.000784743	down
CCDC106	2.14198e-09	-1.21171	6.19802e-05	down
CCDC12	6.03589e-10	-1.11083	1.74654e-05	down
CCDC69	3.63237e-07	-1.27218	0.0105106	down
CCDC92	9.94141e-25	-1.66996	2.87665e-20	down
CCL26	1.50084e-06	-1.49174	0.0434284	down
CCM2	1.10134e-09	-1.47898	3.18683e-05	down
CCNQ	9.84414e-14	-2.06873	2.8485e-09	down
CCSAP	5.46519e-07	-1.31921	0.0158141	down
CD70	7.45825e-08	-1.25326	0.00215812	down
CDA	2.54401e-07	-1.44039	0.00736136	down
CDC25A	1.1818e-06	-1.12161	0.0341965	down
CDC34	2.2133e-08	-1.63326	0.00064044	down
CDC42BPB	1.82157e-15	-1.43543	5.2709e-11	down
CDC42EP1	2.02367e-09	-1.46154	5.8557e-05	down
CDC42EP5	2.93989e-11	-1.59217	8.50688e-07	down
CDCP2	9.76908e-08	-1.35098	0.00282678	down
CDK13	1.98223e-07	-1.01687	0.00573579	down
CDKN1C	1.14887e-08	-1.33454	0.000332436	down
CDT1	8.7487e-15	-2.10265	2.53152e-10	down
CELF5	4.01636e-07	-1.23357	0.0116217	down
CEP104	2.89907e-12	-1.2114	8.38875e-08	down
CEP131	8.57379e-12	-1.29908	2.48091e-07	down
CEP164	7.18586e-07	-1.18426	0.020793	down
CHCHD1	1.93793e-10	-1.53813	5.6076e-06	down
CHD1	2.55229e-12	-1.00685	7.3853e-08	down
CHMP2A	3.3681e-08	-1.07787	0.000974594	down
CHMP4B	1.99767e-17	-1.72519	5.78047e-13	down
CHMP6	1.29462e-06	-1.47124	0.0374612	down
CIB2	5.06704e-11	-1.34298	1.4662e-06	down
CISD3	7.77697e-11	-1.46088	2.25035e-06	down
CKAP4	1.21022e-08	-1.19784	0.000350188	down
CLDN23	1.91599e-10	-1.42984	5.54412e-06	down
CLUH	6.87942e-18	-1.54108	1.99063e-13	down
CMIP	5.13132e-07	-1.20472	0.014848	down
CNNM3	4.90129e-07	-1.13934	0.0141824	down
CNPY2	3.05829e-25	-2.27774	8.84948e-21	down
COCH	4.05131e-15	-1.43237	1.17229e-10	down
COL18A1	2.03191e-26	-1.73564	5.87954e-22	down
CORO7	1.02624e-06	-1.128	0.0296954	down
COX19	5.31619e-08	-1.14841	0.00153829	down
COX6B1	2.34961e-09	-1.13548	6.79882e-05	down
CPEB3	5.337e-08	-1.1625	0.00154431	down
CPNE7	8.27826e-07	-1.23339	0.023954	down
CPT1A	1.1949e-06	-1.18424	0.0345757	down
CRAMP1	5.20774e-07	-1.06823	0.0150691	down
CREB5	5.7875e-16	-1.29794	1.67467e-11	down
CRIM1	3.64077e-07	-1.23509	0.0105349	down
CRIP1	4.57012e-08	-1.43558	0.00132241	down
CRYBG1	2.02882e-07	-1.26199	0.0058706	down
CSK	2.519e-14	-1.44684	7.28898e-10	down
CSNK2A2	1.50582e-06	-1.02963	0.0435723	down
CTDNEP1	6.14454e-13	-1.43125	1.77799e-08	down
CTNNBIP1	1.58151e-07	-1.48731	0.00457625	down
CTRC	2.21187e-16	-1.50822	6.40026e-12	down
CYHR1	7.17941e-18	-1.75924	2.07743e-13	down
DAB2IP	3.43962e-07	-1.1485	0.00995288	down
DAZAP1	1.53775e-12	-1.37336	4.44964e-08	down
DCAF15	2.87342e-17	-1.51641	8.31454e-13	down
DDX21	2.34866e-08	-1.19743	0.000679608	down
DEAF1	8.63611e-11	-1.00048	2.49894e-06	down
DESI2	1.31245e-10	-1.45309	3.7977e-06	down
DHRS11	5.85673e-07	-1.2757	0.016947	down
DHX30	9.26073e-12	-1.14282	2.67968e-07	down
DHX37	2.41933e-12	-1.32127	7.00057e-08	down
DIAPH1	1.66411e-09	-1.20815	4.81527e-05	down
DISC1	3.13915e-09	-1.31251	9.08345e-05	down
DLL3	2.2798e-09	-1.24038	6.59683e-05	down
DMWD	6.52282e-07	-1.25363	0.0188744	down
DNAJB2	4.38001e-10	-1.77224	1.2674e-05	down
DNAJC4	7.66362e-07	-1.07322	0.0221754	down
DNM2	3.44507e-12	-1.28585	9.96864e-08	down
DNMT3A	5.46128e-11	-1.13167	1.58028e-06	down
DOCK3	1.50139e-08	-1.32519	0.000434443	down
DOK7	2.43086e-08	-1.36821	0.000703395	down
DPM3	2.3497e-09	-1.37339	6.79908e-05	down
DPP7	8.24217e-10	-1.19289	2.38496e-05	down
DSCAML1	4.26354e-07	-1.0379	0.012337	down
DUSP8	4.71768e-18	-1.54189	1.36511e-13	down
DVL1	4.81987e-15	-1.66898	1.39468e-10	down
E2F1	3.80583e-15	-1.41319	1.10126e-10	down
EBI3	3.41541e-07	-1.32704	0.00988283	down
EDF1	2.03561e-08	-1.28217	0.000589025	down
EEF1AKMT4	1.22708e-07	-1.36156	0.00355068	down
EEF1D	2.42852e-08	-1.22312	0.000702717	down
EFCAB11	1.4129e-08	-1.18087	0.000408836	down
EFHD2	1.1514e-07	-1.38816	0.0033317	down
EFNB3	1.08465e-18	-1.56389	3.13855e-14	down
EHHADH	4.46428e-13	-1.36068	1.29178e-08	down
EIF3G	1.85864e-07	-1.20326	0.00537815	down
EIF4E1B	6.19777e-08	-2.03794	0.00179339	down
ELOB	2.564e-12	-1.91203	7.4192e-08	down
EMC10	1.3389e-14	-1.35309	3.87424e-10	down
EML2	1.6044e-10	-1.29141	4.64248e-06	down
ENDOG	2.85903e-29	-1.92801	8.27289e-25	down
ENG	5.75143e-10	-1.24418	1.66423e-05	down
ENHO	7.61304e-12	-1.64017	2.20291e-07	down
EPHA4	5.51876e-14	-1.61826	1.59691e-09	down
ERICH5	1.12955e-10	-1.01588	3.26848e-06	down
ESRRA	3.50277e-08	-1.15554	0.00101356	down
ETFB	9.05345e-07	-1.11642	0.0261971	down
EXOSC6	8.41402e-08	-1.36093	0.00243468	down
EXTL1	3.81906e-07	-1.24915	0.0110508	down
FABP3	3.87977e-11	-1.70585	1.12265e-06	down
FAM129B	1.74442e-09	-1.37234	5.04764e-05	down
FAM173A	4.86396e-08	-1.72563	0.00140743	down
FAM181B	1.68029e-11	-1.39282	4.86209e-07	down
FAM207A	3.95794e-09	-1.70907	0.000114527	down
FAM3D	1.31395e-09	-1.52251	3.80205e-05	down
FANCE	1.09724e-08	-1.2408	0.000317498	down
FAU	6.99345e-10	-1.51778	2.02362e-05	down
FBP1	3.10038e-11	-1.70936	8.97127e-07	down
FBRS	6.20926e-07	-1.15279	0.0179671	down
FBXL6	1.26848e-08	-1.55423	0.000367046	down
FBXL8	3.73597e-07	-1.38471	0.0108104	down
FBXW4	8.56793e-14	-1.17028	2.47922e-09	down
FDX2	1.68651e-09	-1.73135	4.88007e-05	down
FGFR1	1.30588e-09	-1.25311	3.7787e-05	down
FIS1	6.56361e-07	-1.35698	0.0189925	down
FKBP2	9.84366e-08	-1.42268	0.00284836	down
FLNA	1.07351e-06	-1.19446	0.0310632	down
FMC1	2.76305e-08	-1.23711	0.000799517	down
FMO5	3.13502e-09	-1.36172	9.07149e-05	down
FNDC10	1.25063e-07	-1.1498	0.00361883	down
FNIP2	4.59978e-11	-1.25183	1.33099e-06	down
FOSL2	9.7819e-07	-1.07917	0.0283049	down
FOXA3	4.35767e-09	-1.33873	0.000126094	down
FOXK1	3.25552e-11	-1.41961	9.42018e-07	down
FOXK2	1.95582e-07	-1.0496	0.00565937	down
FOXO3	3.4871e-12	-1.16473	1.00903e-07	down
FOXP4	7.07312e-09	-1.16736	0.000204668	down
FTHL17	3.10256e-09	-1.03464	8.97757e-05	down
FXR2	1.00638e-08	-1.31125	0.000291205	down
FXYD4	1.12897e-07	-1.62908	0.00326678	down
FZR1	1.60034e-09	-1.33118	4.63074e-05	down
GADD45GIP1	2.31244e-09	-2.09569	6.69128e-05	down
GAL	1.30726e-06	-1.09907	0.0378269	down
GAST	1.88358e-08	-1.48544	0.000545032	down
GBX1	1.65008e-10	-1.34752	4.77466e-06	down
GDF6	8.91775e-20	-1.45908	2.58044e-15	down
GIPC1	8.41799e-09	-1.42533	0.000243583	down
GIT1	1.70739e-09	-1.05708	4.94051e-05	down
GKAP1	4.14674e-11	-1.25868	1.1999e-06	down
GLIS2	1.76509e-13	-1.66579	5.10748e-09	down
GMEB2	1.47621e-13	-1.39687	4.27157e-09	down
GNB1L	3.62729e-19	-1.71401	1.04959e-14	down
GNB2	1.47636e-08	-1.59715	0.000427199	down
GP9	1.73397e-07	-1.19551	0.00501742	down
GPAT4	1.40625e-08	-1.1412	0.000406913	down
GPC1	5.23669e-13	-1.36826	1.51529e-08	down
GPR153	2.74717e-20	-1.60219	7.94922e-16	down
GPX1	3.68933e-07	-1.5605	0.0106754	down
GRAMD1A	4.16006e-12	-1.2222	1.20375e-07	down
GRAMD1B	1.03142e-06	-1.24697	0.0298452	down
GRASP	8.12719e-08	-1.53249	0.00235168	down
GRB10	5.62225e-09	-1.05237	0.000162685	down
GRK2	4.7133e-09	-1.33404	0.000136384	down
GRK3	5.61588e-08	-1.08922	0.00162501	down
GSDMD	1.07504e-11	-1.31924	3.11072e-07	down
GSTO1	2.31531e-10	-1.53393	6.69957e-06	down
GTF2F1	2.62159e-11	-1.04368	7.58584e-07	down
H2AFJ	8.65954e-10	-1.53324	2.50572e-05	down
H2AFX	1.29808e-06	-1.44545	0.0375613	down
HABP4	2.50799e-22	-1.83455	7.25711e-18	down
HBEGF	2.93661e-11	-1.34795	8.49738e-07	down
HBQ1	3.11103e-09	-1.98169	9.00207e-05	down
HCFC1R1	2.22483e-09	-1.21665	6.43776e-05	down
HCST	3.83242e-09	-1.13404	0.000110895	down
HDAC11	1.96913e-10	-1.44317	5.69788e-06	down
HDAC4	1.06135e-15	-1.33669	3.07112e-11	down
HDGFL2	3.61626e-07	-1.12204	0.010464	down
HIC2	8.89121e-12	-1.42318	2.57276e-07	down
HIST1H3D	2.81788e-11	-1.77377	8.15382e-07	down
HIST2H2AC	7.97465e-09	-1.65975	0.000230755	down
HMGXB3	4.48833e-07	-1.24293	0.0129874	down
HNRNPAB	2.77544e-12	-1.69198	8.031e-08	down
HNRNPL	1.16551e-09	-1.17788	3.37251e-05	down
HNRNPUL2	8.21322e-09	-1.18541	0.000237658	down
HSCB	2.19891e-08	-1.06592	0.000636278	down
HYPK	1.70786e-09	-1.40905	4.94187e-05	down
ID1	3.63788e-11	-1.45793	1.05266e-06	down
ID3	5.96955e-09	-2.08588	0.000172735	down
IFFO1	6.49402e-08	-1.22194	0.00187911	down
IFI27	1.63976e-08	-2.38937	0.000474482	down
IFT172	5.42555e-08	-1.10407	0.00156994	down
IFT43	1.60601e-08	-1.576	0.000464715	down
IGFBP2	1.28136e-08	-1.40267	0.000370774	down
IL17B	2.7104e-11	-1.37362	7.8428e-07	down
IL4I1	3.21385e-10	-1.10627	9.29959e-06	down
ILRUN	1.09978e-08	-1.03446	0.000318232	down
INO80E	2.09754e-17	-1.72691	6.06944e-13	down
INPP5A	5.15294e-12	-1.28888	1.49105e-07	down
INPP5J	1.27147e-07	-1.11814	0.00367911	down
INTS1	2.03949e-16	-1.3685	5.90147e-12	down
IRF2BPL	2.47721e-20	-1.46899	7.16805e-16	down
ISG20	4.74823e-09	-1.54579	0.000137395	down
ITGA3	8.07716e-07	-1.2789	0.0233721	down
ITPK1	6.33042e-11	-1.25861	1.83177e-06	down
JPH1	6.14615e-07	-1.30651	0.0177845	down
JUND	7.60212e-10	-1.64572	2.19975e-05	down
KANK2	2.54916e-09	-1.02508	7.37625e-05	down
KAT2A	1.81956e-08	-1.21861	0.000526508	down
KCNC4	4.58189e-18	-1.70658	1.32582e-13	down
KCNQ1	5.16841e-08	-1.30021	0.00149553	down
KCTD2	8.07864e-15	-1.34375	2.33763e-10	down
KDM4B	7.70133e-08	-1.35856	0.00222846	down
KIAA0930	3.06181e-07	-1.19428	0.00885966	down
KIAA1958	2.23946e-11	-1.22234	6.4801e-07	down
KLF16	4.6023e-22	-2.01619	1.33172e-17	down
KLF2	3.35923e-07	-1.44109	0.00972026	down
KLK12	2.14463e-07	-1.36532	0.00620569	down
KLRG2	1.52006e-06	-1.30607	0.0439844	down
KMT2B	2.51402e-10	-1.26474	7.27456e-06	down
KPNB1	1.72931e-09	-1.1999	5.00394e-05	down
KRI1	3.77051e-08	-1.19533	0.00109104	down
KRT16	2.06583e-12	-1.44227	5.9777e-08	down
LACTB	3.41769e-07	-1.13925	0.00988942	down
LDB1	4.64921e-09	-1.37671	0.00013453	down
LEMD2	4.216e-11	-1.37993	1.21994e-06	down
LENG1	4.10485e-10	-1.3831	1.18778e-05	down
LENG8	1.85018e-07	-1.1989	0.00535368	down
LIMD1	9.38295e-14	-1.34961	2.71505e-09	down
LOC100423679	2.24461e-10	-1.21474	6.49499e-06	down
LOC100423704	6.35903e-07	-1.10248	0.0184005	down
LOC100423823	4.07458e-11	-1.65887	1.17902e-06	down
LOC100424644	1.83924e-15	-1.63908	5.32204e-11	down
LOC100424768	1.25773e-10	-2.27308	3.63937e-06	down
LOC100425072	4.3624e-11	-1.499	1.2623e-06	down
LOC100427953	1.22589e-07	-1.13587	0.00354723	down
LOC100428761	4.09873e-11	-1.48178	1.18601e-06	down
LOC100429133	7.56906e-08	-1.19652	0.00219018	down
LOC100429752	8.71119e-21	-2.61929	2.52067e-16	down
LOC100430669	1.00295e-09	-1.28161	2.90213e-05	down
LOC100430823	0	-2.10856	0	down
LOC100430841	4.46209e-12	-1.56122	1.29115e-07	down
LOC106992964	1.06735e-07	-1.25394	0.00308848	down
LOC106993156	8.76903e-11	-1.50464	2.53741e-06	down
LOC106993211	6.01463e-07	-1.12324	0.0174039	down
LOC106993547	6.74945e-12	-1.84914	1.95302e-07	down
LOC106993577	6.83126e-11	-1.46727	1.97669e-06	down
LOC106993589	1.61104e-11	-1.49867	4.6617e-07	down
LOC106993609	2.02389e-07	-1.48652	0.00585634	down
LOC106993916	4.38791e-08	-1.09132	0.00126968	down
LOC106994133	7.31764e-11	-1.76208	2.11743e-06	down
LOC106994392	4.65126e-07	-1.26451	0.0134589	down
LOC106994615	6.17176e-12	-1.37914	1.78586e-07	down
LOC106994910	1.74341e-14	-2.1918	5.04474e-10	down
LOC106994980	3.78138e-08	-1.38736	0.00109418	down
LOC106995048	4.99351e-09	-1.50693	0.000144492	down
LOC106995127	3.4487e-18	-1.42441	9.97917e-14	down
LOC106995270	1.79091e-13	-1.48567	5.18218e-09	down
LOC106995347	1.11304e-06	-1.43576	0.032207	down
LOC106995957	9.67011e-10	-1.06384	2.79814e-05	down
LOC106996191	4.67557e-07	-1.35994	0.0135292	down
LOC106996343	2.44114e-07	-1.43721	0.00706369	down
LOC106996504	0	-1.84752	0	down
LOC106997328	3.79358e-09	-1.2395	0.000109771	down
LOC106997434	1.94197e-10	-1.2667	5.61929e-06	down
LOC106997935	4.99729e-07	-1.23517	0.0144602	down
LOC106998007	2.14255e-08	-1.34103	0.000619969	down
LOC106998966	1.67329e-08	-1.28408	0.000484184	down
LOC106998981	2.77088e-08	-1.48324	0.000801781	down
LOC106999057	9.50671e-09	-1.90798	0.000275086	down
LOC106999121	1.49034e-10	-1.4235	4.31246e-06	down
LOC106999277	8.05069e-07	-1.54483	0.0232955	down
LOC106999355	1.93357e-10	-1.5156	5.59498e-06	down
LOC106999575	6.47331e-10	-1.60002	1.87312e-05	down
LOC106999717	1.97046e-08	-1.42269	0.000570171	down
LOC106999776	1.75787e-08	-1.49602	0.000508658	down
LOC106999938	3.15702e-07	-1.37289	0.00913516	down
LOC107000260	4.55176e-09	-1.4689	0.00013171	down
LOC107000606	5.67442e-08	-1.34505	0.00164195	down
LOC107000687	1.74205e-09	-1.6221	5.04079e-05	down
LOC107000724	4.82847e-13	-1.57636	1.39717e-08	down
LOC107000783	1.39943e-08	-1.02371	0.00040494	down
LOC107000809	1.8559e-17	-1.72999	5.37023e-13	down
LOC107000840	8.35891e-07	-1.38036	0.0241873	down
LOC107000898	2.42751e-16	-1.32319	7.02424e-12	down
LOC107000903	3.75817e-07	-1.46497	0.0108746	down
LOC107000909	5.2226e-12	-1.19804	1.51121e-07	down
LOC107000943	2.5925e-13	-1.77725	7.50166e-09	down
LOC107001026	7.9485e-08	-1.51189	0.00229998	down
LOC114669718	1.53066e-07	-1.3941	0.00442912	down
LOC114669774	1.782e-12	-1.48906	5.15639e-08	down
LOC114669847	4.35969e-08	-1.55674	0.00126152	down
LOC114669857	2.6716e-08	-1.02598	0.000773055	down
LOC114670022	1.72347e-11	-1.92166	4.98705e-07	down
LOC114670050	5.21152e-09	-1.33452	0.0001508	down
LOC114670060	1.10597e-13	-2.52334	3.20023e-09	down
LOC114670419	1.61344e-71	-1.96686	4.66865e-67	down
LOC114670480	2.44282e-11	-1.49003	7.06855e-07	down
LOC114670503	2.59159e-07	-1.50012	0.00749902	down
LOC114670854	5.01971e-07	-1.18123	0.014525	down
LOC114671014	4.41317e-11	-1.23645	1.27699e-06	down
LOC114671035	1.54324e-07	-1.55618	0.00446551	down
LOC114671087	1.4461e-09	-1.31366	4.18443e-05	down
LOC114671351	2.92019e-08	-1.1684	0.000844985	down
LOC114671522	7.77291e-09	-1.1057	0.000224917	down
LOC114671902	2.31992e-19	-1.74135	6.71291e-15	down
LOC114672249	1.17462e-14	-1.63013	3.39887e-10	down
LOC114672366	2.02175e-07	-1.35981	0.00585014	down
LOC114672628	4.46677e-07	-1.03235	0.012925	down
LOC114672677	2.65858e-16	-1.82358	7.69288e-12	down
LOC114672678	2.29611e-07	-1.51551	0.00664401	down
LOC114672991	6.79628e-11	-1.34235	1.96657e-06	down
LOC114673092	9.04003e-17	-2.32783	2.61582e-12	down
LOC114673195	5.47776e-09	-1.35126	0.000158504	down
LOC114673466	4.61944e-11	-1.18114	1.33668e-06	down
LOC114673695	3.10832e-26	-1.88476	8.99423e-22	down
LOC114673711	1.60367e-06	-1.12053	0.0464039	down
LOC114673819	1.19197e-09	-1.45551	3.44908e-05	down
LOC114674037	6.05017e-12	-1.47017	1.75068e-07	down
LOC114674062	6.70688e-10	-1.30803	1.9407e-05	down
LOC114674074	1.32963e-07	-1.00185	0.00384743	down
LOC114674102	8.11028e-07	-1.2308	0.0234679	down
LOC114674126	1.87448e-14	-1.47459	5.42399e-10	down
LOC114674287	1.05074e-16	-1.98831	3.04042e-12	down
LOC114674333	3.34204e-14	-1.66918	9.67054e-10	down
LOC114674370	2.09222e-13	-1.55101	6.05405e-09	down
LOC114674414	1.14474e-06	-1.17634	0.0331242	down
LOC114675039	1.41613e-12	-1.37254	4.09772e-08	down
LOC114675413	7.62335e-09	-1.10228	0.000220589	down
LOC114675521	1.05099e-18	-1.78717	3.04113e-14	down
LOC114675539	6.88408e-33	-1.84324	1.99198e-28	down
LOC114675554	4.32988e-13	-1.33787	1.25289e-08	down
LOC114675582	5.13069e-09	-1.1662	0.000148462	down
LOC114675595	2.36027e-10	-1.34185	6.82969e-06	down
LOC114675599	3.5337e-07	-1.22755	0.0102251	down
LOC114675601	1.07241e-14	-2.42041	3.10312e-10	down
LOC114675885	7.95713e-25	-2.90006	2.30247e-20	down
LOC114675979	1.5901e-07	-1.15088	0.00460112	down
LOC114675993	2.24324e-09	-1.14328	6.49104e-05	down
LOC114676083	5.78986e-13	-1.43711	1.67536e-08	down
LOC114676249	1.45048e-06	-1.44993	0.0419709	down
LOC114676367	2.1154e-07	-1.16994	0.00612112	down
LOC114676402	2.47036e-13	-1.66907	7.14823e-09	down
LOC114676967	5.33304e-11	-1.22424	1.54317e-06	down
LOC114677434	1.21932e-06	-1.02563	0.0352823	down
LOC114677460	8.50185e-11	-1.56926	2.4601e-06	down
LOC114677482	6.84317e-10	-2.67366	1.98014e-05	down
LOC114677669	6.26851e-12	-1.70428	1.81386e-07	down
LOC114677682	7.59146e-10	-1.54324	2.19667e-05	down
LOC114678366	3.48853e-12	-2.01102	1.00944e-07	down
LOC114678729	2.45009e-25	-1.46998	7.08959e-21	down
LOC114678873	5.98214e-10	-1.42792	1.73099e-05	down
LOC114678993	1.48219e-27	-3.08875	4.28888e-23	down
LOC114679003	2.34555e-41	-2.34525	6.78707e-37	down
LOC114679546	3.38617e-14	-1.61921	9.79822e-10	down
LOC114679578	2.69805e-09	-1.99836	7.80708e-05	down
LOC114679660	1.84621e-20	-1.95193	5.34219e-16	down
LOC114680209	2.90787e-11	-2.16985	8.41421e-07	down
LOC114680233	1.85778e-10	-1.32184	5.37568e-06	down
LOC114680325	1.5158e-08	-1.02497	0.000438611	down
LOC114680366	5.44458e-09	-1.49308	0.000157544	down
LOC114680393	3.36392e-09	-1.46734	9.73382e-05	down
LOC114680572	4.04926e-16	-2.05883	1.17169e-11	down
LOC694228	5.00449e-17	-2.0582	1.4481e-12	down
LOC695122	1.01335e-07	-1.09655	0.00293222	down
LOC695427	1.45616e-09	-1.33882	4.21356e-05	down
LOC696103	1.38503e-06	-1.09594	0.0400774	down
LOC696134	2.15842e-07	-1.03627	0.00624561	down
LOC696423	3.41485e-08	-1.39541	0.000988121	down
LOC696463	1.02151e-08	-1.38421	0.000295583	down
LOC696808	3.4447e-07	-1.26911	0.00996759	down
LOC697065	2.48132e-09	-1.17026	7.17994e-05	down
LOC697476	1.71096e-11	-1.69806	4.95084e-07	down
LOC697761	3.68073e-10	-1.17056	1.06506e-05	down
LOC698130	3.40621e-15	-1.72839	9.85621e-11	down
LOC698197	6.32862e-10	-1.44791	1.83125e-05	down
LOC698226	4.74967e-08	-1.11977	0.00137436	down
LOC698297	4.35593e-13	-1.45512	1.26043e-08	down
LOC698417	2.27113e-07	-1.21777	0.00657174	down
LOC698582	8.35091e-10	-1.31729	2.41642e-05	down
LOC698713	3.29796e-19	-1.55024	9.54299e-15	down
LOC699053	7.03296e-07	-1.1317	0.0203506	down
LOC699719	1.10622e-07	-1.37608	0.00320096	down
LOC699778	7.68634e-09	-1.3548	0.000222412	down
LOC700019	5.64128e-11	-1.47282	1.63236e-06	down
LOC700257	4.23821e-09	-1.21375	0.000122637	down
LOC701212	5.41446e-16	-1.4092	1.56673e-11	down
LOC701223	5.63338e-09	-1.0412	0.000163008	down
LOC701691	5.1266e-12	-1.30033	1.48343e-07	down
LOC701710	1.32373e-10	-1.28719	3.83035e-06	down
LOC701909	5.21867e-16	-2.10571	1.51007e-11	down
LOC702297	3.72968e-08	-1.10379	0.00107922	down
LOC702847	1.86997e-09	-1.01113	5.41094e-05	down
LOC702875	1.87223e-07	-1.08095	0.00541749	down
LOC703344	1.54227e-09	-1.70243	4.46271e-05	down
LOC703365	7.99411e-10	-1.63741	2.31318e-05	down
LOC703455	1.13644e-13	-1.07235	3.28841e-09	down
LOC703641	5.99121e-08	-1.61922	0.00173362	down
LOC704083	1.31741e-06	-1.12032	0.0381205	down
LOC704394	7.67012e-14	-1.52251	2.21943e-09	down
LOC705126	1.09153e-06	-1.25651	0.0315844	down
LOC705310	9.54886e-12	-1.25305	2.76306e-07	down
LOC705325	7.67772e-08	-1.21348	0.00222163	down
LOC706087	1.91154e-07	-1.3868	0.00553123	down
LOC706177	3.80474e-08	-1.17669	0.00110094	down
LOC706496	5.9716e-08	-1.09909	0.00172794	down
LOC706606	5.84803e-08	-1.01828	0.00169219	down
LOC707468	4.40754e-12	-1.27297	1.27537e-07	down
LOC707476	9.00617e-07	-1.07696	0.0260603	down
LOC707555	1.77397e-15	-1.56788	5.13316e-11	down
LOC709045	1.98317e-10	-1.42139	5.7385e-06	down
LOC709738	8.96055e-11	-1.60374	2.59282e-06	down
LOC709769	1.46825e-12	-1.5371	4.24854e-08	down
LOC710274	8.39251e-08	-1.0579	0.00242846	down
LOC710317	1.03003e-20	-2.71676	2.98051e-16	down
LOC710583	1.02447e-14	-1.62949	2.96439e-10	down
LOC710642	2.60291e-13	-1.16193	7.53179e-09	down
LOC710665	8.01406e-12	-1.62744	2.31895e-07	down
LOC711062	7.17413e-12	-1.05195	2.07591e-07	down
LOC713572	4.17077e-09	-1.27631	0.000120685	down
LOC714171	2.85523e-10	-1.05817	8.26189e-06	down
LOC714598	7.61842e-11	-1.5312	2.20447e-06	down
LOC714620	3.61681e-10	-1.74627	1.04656e-05	down
LOC714691	8.79769e-09	-1.21437	0.00025457	down
LOC714877	6.78534e-09	-1.06538	0.000196341	down
LOC716530	9.70488e-07	-1.10566	0.028082	down
LOC716879	1.96939e-14	-1.99349	5.69863e-10	down
LOC717763	9.84858e-15	-1.67499	2.84978e-10	down
LOC718392	3.6746e-10	-1.44266	1.06328e-05	down
LOC718588	1.69914e-06	-1.18838	0.0491663	down
LOC718737	7.86452e-10	-1.02646	2.27568e-05	down
LOC719242	1.19286e-09	-1.21411	3.45166e-05	down
LOC719376	6.41451e-16	-2.36498	1.8561e-11	down
LOC719632	3.11343e-16	-1.55628	9.00901e-12	down
LOC719895	5.3549e-08	-1.17628	0.00154949	down
LOC719947	7.41732e-07	-1.1799	0.0214628	down
LOC720019	3.71513e-11	-1.10174	1.07501e-06	down
LOC720251	1.3871e-06	-1.13003	0.0401372	down
LOC723355	2.32528e-08	-1.50311	0.000672844	down
LRP3	1.96536e-10	-1.46456	5.68698e-06	down
LRRC46	4.6471e-08	-1.19407	0.00134468	down
LSM14B	7.85667e-10	-1.41645	2.27341e-05	down
LSM7	7.02654e-15	-1.50813	2.0332e-10	down
LTBP4	1.83379e-09	-1.16754	5.30627e-05	down
LUZP6	7.09751e-229	-2.05151	2.05374e-224	down
MACF1	2.02344e-09	-1.11395	5.85503e-05	down
MAGIX	2.39513e-11	-1.66092	6.93054e-07	down
MAN2B1	1.00926e-10	-1.38637	2.92038e-06	down
MAP11	1.34995e-09	-1.40028	3.9062e-05	down
MAP2K2	5.12049e-15	-1.9061	1.48167e-10	down
MAP2K7	8.6273e-13	-1.38267	2.4964e-08	down
MAP3K11	1.1535e-09	-1.25528	3.33777e-05	down
MAP3K3	4.29651e-13	-1.24284	1.24324e-08	down
MAP4K1	1.64135e-07	-1.15861	0.00474941	down
MAP6	1.21366e-12	-1.30417	3.51184e-08	down
MAPK12	3.44156e-09	-1.44452	9.95849e-05	down
MAPK3	8.14005e-16	-1.50484	2.3554e-11	down
MAPK8IP3	6.81751e-10	-1.19963	1.97271e-05	down
MAPKAPK2	5.78447e-18	-1.888	1.6738e-13	down
MAPKBP1	8.29362e-07	-1.09989	0.0239984	down
2025-03-02	3.40411e-09	-1.26839	9.85014e-05	down
MARK2	1.6872e-08	-1.25345	0.000488209	down
MARK4	8.12542e-16	-1.43231	2.35117e-11	down
MAST2	1.61272e-08	-1.23414	0.000466656	down
MAZ	6.48313e-13	-1.33425	1.87596e-08	down
MBD2	1.14697e-06	-1.3371	0.0331887	down
MBD3	1.73131e-21	-1.68362	5.00972e-17	down
MCHR1	1.71273e-22	-1.92692	4.95595e-18	down
MECP2	1.08037e-10	-1.02527	3.12616e-06	down
MED26	3.28125e-16	-1.46605	9.49461e-12	down
MEF2D	2.2832e-07	-1.19315	0.00660667	down
MELTF	3.36609e-12	-1.39386	9.74013e-08	down
MESP1	9.61213e-08	-1.63685	0.00278137	down
MICALL2	6.49441e-10	-1.30735	1.87922e-05	down
MIDN	2.2889e-20	-1.7587	6.62315e-16	down
MISP3	1.39097e-10	-1.57498	4.02491e-06	down
MLLT1	6.07208e-09	-1.28384	0.000175702	down
MNX1	4.79992e-19	-1.69591	1.38891e-14	down
MOGS	4.16096e-15	-1.45465	1.20402e-10	down
MOSMO	2.95188e-09	-1.36228	8.54157e-05	down
MOV10	5.19905e-12	-1.4459	1.5044e-07	down
MPIG6B	4.5343e-10	-1.4906	1.31204e-05	down
MPND	1.31132e-20	-1.6293	3.79443e-16	down
MRPL12	5.79268e-08	-1.4827	0.00167617	down
MRPL23	2.96638e-10	-1.86618	8.58353e-06	down
MRPL41	6.47282e-08	-1.52429	0.00187297	down
MRPL51	1.16635e-06	-1.0499	0.0337494	down
MRPL52	7.57483e-08	-1.7863	0.00219185	down
MRPL53	3.41277e-09	-1.27683	9.87519e-05	down
MT1X	1.25821e-06	-1.61157	0.0364075	down
MT3	1.97667e-10	-1.40794	5.7197e-06	down
MTA1	1.1508e-07	-1.15094	0.00332995	down
MTCH1	1.30816e-09	-1.34175	3.7853e-05	down
MTLN	6.14067e-07	-1.18996	0.0177686	down
MXD4	6.45169e-13	-1.72175	1.86686e-08	down
MYD88	4.46346e-07	-1.35559	0.0129155	down
MYH11	1.97393e-07	-1.16314	0.00571175	down
MYO16	2.3665e-08	-1.16016	0.000684771	down
MYOZ1	1.86416e-07	-1.25878	0.00539415	down
MZT2B	1.79263e-20	-1.8576	5.18716e-16	down
NAA38	3.4373e-08	-1.19603	0.000994616	down
NACC1	1.24726e-08	-1.32499	0.000360908	down
NASP	1.42719e-09	-1.0854	4.12972e-05	down
NCBP2	6.7809e-08	-1.03778	0.00196212	down
NCOR2	3.65011e-14	-1.32197	1.0562e-09	down
NDUFA11	1.58943e-10	-1.4374	4.59918e-06	down
NDUFA13	2.99274e-09	-1.37099	8.65978e-05	down
NDUFA2	8.45764e-08	-1.16867	0.0024473	down
NDUFA3	3.02108e-09	-1.42673	8.7418e-05	down
NDUFA6	9.86099e-08	-1.02912	0.00285338	down
NDUFA7	7.29008e-07	-1.08036	0.0210946	down
NDUFAF8	5.67555e-08	-1.41343	0.00164228	down
NDUFB1	5.25114e-10	-1.24135	1.51947e-05	down
NDUFB10	4.92053e-08	-1.11379	0.00142381	down
NDUFB11	5.02403e-07	-1.17843	0.0145375	down
NDUFB7	1.16432e-06	-1.4841	0.0336909	down
NDUFS6	2.56069e-08	-1.45993	0.000740962	down
NDUFV3	1.72079e-09	-1.17785	4.97927e-05	down
NELFB	4.24591e-11	-1.36963	1.2286e-06	down
NENF	8.15114e-07	-1.84478	0.0235862	down
NFATC2IP	5.44504e-11	-1.11744	1.57558e-06	down
NLK	1.47544e-09	-1.17243	4.26933e-05	down
NME2	8.38632e-10	-1.26763	2.42666e-05	down
NME3	3.84121e-10	-1.35521	1.11149e-05	down
NMRK2	2.08672e-20	-1.91137	6.03813e-16	down
NOL3	4.18532e-07	-1.21184	0.0121106	down
NPLOC4	2.85778e-09	-1.39205	8.26927e-05	down
NPRL3	5.89294e-09	-1.39841	0.000170518	down
NT5C	4.83122e-07	-1.32144	0.0139796	down
NUCKS1	5.15956e-13	-1.41604	1.49297e-08	down
NUDT16	3.16524e-07	-1.34223	0.00915895	down
NUPR1	1.15319e-10	-1.3779	3.33688e-06	down
OBSL1	3.75063e-07	-1.30923	0.0108528	down
ORAI1	3.18431e-08	-1.49072	0.000921411	down
ORMDL3	1.94371e-10	-1.36971	5.62432e-06	down
OXLD1	3.26838e-07	-1.19986	0.00945737	down
PACS2	8.82104e-23	-1.65965	2.55246e-18	down
PAFAH1B3	8.70592e-07	-1.0314	0.0251915	down
PAG1	7.68269e-07	-1.14555	0.0222306	down
PAK4	2.02671e-09	-1.21573	5.8645e-05	down
PALM3	3.24259e-14	-1.52583	9.38275e-10	down
PAM16	9.87591e-09	-1.4747	0.000285769	down
PAOX	5.33345e-10	-1.48577	1.54329e-05	down
PARD6G	1.20338e-10	-1.28673	3.4821e-06	down
PAXX	2.78371e-10	-1.42167	8.05496e-06	down
PBXIP1	3.41249e-07	-1.32997	0.00987437	down
PCBP2	1.94672e-16	-1.91197	5.63303e-12	down
PCNX3	4.24776e-07	-1.10438	0.0122913	down
PDRG1	9.11062e-07	-1.4234	0.0263625	down
PDZD7	2.42018e-14	-1.32078	7.00304e-10	down
PET100	3.93748e-08	-1.71576	0.00113935	down
PFDN2	2.05692e-07	-1.07825	0.0059519	down
PFDN5	6.43773e-11	-1.34293	1.86282e-06	down
PFDN6	1.11414e-21	-2.57045	3.22388e-17	down
PGLS	5.14354e-08	-1.29047	0.00148834	down
PHETA1	1.47167e-19	-1.63564	4.25844e-15	down
PHF10	2.59137e-11	-1.03584	7.49839e-07	down
PHF14	7.74003e-08	-1.01805	0.00223966	down
PHRF1	1.81612e-08	-1.31641	0.000525513	down
PI4K2A	5.90186e-09	-1.2224	0.000170776	down
PIEZO1	4.21744e-14	-1.2909	1.22036e-09	down
PIN4	5.51847e-07	-1.71174	0.0159682	down
PINK1	4.95049e-12	-1.52267	1.43247e-07	down
PITPNA	4.03037e-10	-1.17237	1.16623e-05	down
PITX1	1.18254e-11	-1.70727	3.42179e-07	down
PKD1	2.27851e-08	-1.31568	0.000659311	down
PKN1	1.563e-08	-1.35204	0.000452269	down
PLA2G7	7.3623e-08	-1.19597	0.00213035	down
PLEKHA8	8.01296e-08	-1.2804	0.00231863	down
PLEKHH3	3.30826e-10	-1.61334	9.57279e-06	down
PLEKHO1	4.84203e-20	-1.94909	1.40109e-15	down
PLSCR3	1.2424e-07	-1.10187	0.003595	down
PMM1	1.26601e-08	-1.03971	0.000366334	down
PNPLA2	1.10307e-09	-1.79839	3.19186e-05	down
POLR2F	3.74024e-08	-1.3281	0.00108228	down
POLR2L	1.40309e-08	-1.85522	0.000405998	down
POLRMT	1.60206e-07	-1.33489	0.00463573	down
PPP1R10	1.95135e-07	-1.06526	0.00564642	down
PPP1R13B	9.62836e-09	-1.05378	0.000278606	down
PPP1R13L	2.56584e-08	-1.25813	0.000742451	down
PPP1R14B	8.00023e-27	-1.66947	2.31495e-22	down
PPP1R1A	1.202e-06	-1.6736	0.0347811	down
PPP1R37	1.60098e-12	-1.56981	4.6326e-08	down
PPP1R3D	3.94555e-08	-1.16122	0.00114169	down
PPP6R1	7.88565e-14	-1.29273	2.28179e-09	down
PRCD	2.34571e-09	-1.10919	6.78756e-05	down
PRR14	2.37359e-21	-1.79121	6.86822e-17	down
PRRG2	1.59563e-08	-1.16239	0.000461712	down
PRSS57	3.20807e-09	-1.43739	9.28287e-05	down
PSMG3	3.20354e-07	-1.17125	0.00926977	down
PSMG4	6.66097e-09	-1.39175	0.000192742	down
PTGES2	7.09452e-09	-1.53274	0.000205287	down
PTH1R	1.37246e-07	-1.28333	0.00397134	down
PTOV1	7.56138e-14	-1.86155	2.18796e-09	down
PTPA	2.10864e-19	-1.70308	6.10155e-15	down
PTPN11	2.65692e-12	-1.3993	7.68807e-08	down
PTPRE	2.36246e-07	-1.04543	0.00683601	down
PUSL1	1.64436e-08	-1.15479	0.000475813	down
RASGRP2	1.70708e-08	-1.54191	0.000493962	down
RASL10A	1.04865e-06	-1.72908	0.0303438	down
RBCK1	4.3575e-07	-1.13124	0.0126089	down
RBM38	1.33935e-06	-1.27721	0.0387554	down
RCC1L	3.54122e-12	-1.21074	1.02469e-07	down
RDH10	2.39734e-08	-1.3713	0.000693694	down
RECQL4	9.48623e-21	-1.41389	2.74494e-16	down
RESP18	1.94926e-07	-1.57369	0.00564038	down
RETREG2	5.98779e-15	-1.47532	1.73263e-10	down
REXO1	3.53075e-18	-1.76116	1.02166e-13	down
RING1	8.2392e-13	-1.43573	2.38409e-08	down
RNASEK	2.43571e-09	-1.11372	7.04796e-05	down
RNF125	4.08667e-08	-1.22993	0.00118252	down
RNF187	1.56087e-11	-1.43183	4.51654e-07	down
RNF220	1.15499e-15	-1.26204	3.34208e-11	down
RNPEPL1	9.06696e-07	-1.32888	0.0262362	down
ROMO1	3.15196e-10	-1.75726	9.12051e-06	down
RP9	1.44018e-08	-1.32241	0.000416731	down
RPH3AL	4.24105e-08	-1.376	0.00122719	down
RPL11	1.72912e-08	-1.35194	0.000500337	down
RPL12	3.69661e-10	-1.39687	1.06965e-05	down
RPL13	1.11657e-08	-1.31205	0.000323089	down
RPL13A	1.57707e-12	-1.51136	4.56341e-08	down
RPL18	1.51471e-12	-1.6879	4.38298e-08	down
RPL18A	2.34694e-09	-1.64635	6.7911e-05	down
RPL21	4.95439e-07	-1.13456	0.014336	down
RPL23	5.87073e-07	-1.33833	0.0169875	down
RPL26	3.20351e-10	-1.471	9.26967e-06	down
RPL27A	1.77545e-16	-1.9578	5.13745e-12	down
RPL28	6.73591e-13	-1.80417	1.9491e-08	down
RPL29	2.05615e-14	-1.82469	5.94967e-10	down
RPL31	1.37668e-08	-1.0515	0.000398355	down
RPL32	5.83531e-09	-1.19997	0.00016885	down
RPL35	3.94022e-13	-1.65854	1.14014e-08	down
RPL35A	7.57089e-09	-1.34659	0.000219071	down
RPL36	2.8944e-12	-2.55326	8.37524e-08	down
RPL37A	6.52323e-12	-1.19285	1.88756e-07	down
RPL38	1.69208e-09	-1.60216	4.89621e-05	down
RPL39	1.03734e-06	-1.05425	0.0300164	down
RPL4	1.14788e-08	-1.02365	0.000332151	down
RPL41	2.10752e-10	-1.40337	6.09831e-06	down
RPLP2	9.47511e-12	-1.99843	2.74172e-07	down
RPN1	1.51619e-10	-1.2289	4.38724e-06	down
RPP21	2.46198e-08	-1.07811	0.0007124	down
RPS10	3.55032e-08	-1.07491	0.00102732	down
RPS11	2.3686e-09	-1.25118	6.85379e-05	down
RPS12	1.01823e-06	-1.27805	0.0294635	down
RPS14	1.53534e-08	-1.0533	0.000444267	down
RPS15	1.85405e-09	-1.70943	5.36487e-05	down
RPS19	1.90604e-08	-1.21832	0.000551531	down
RPS19BP1	2.30488e-10	-1.86584	6.6694e-06	down
RPS2	5.45628e-08	-1.46369	0.00157883	down
RPS20	1.53045e-07	-1.26979	0.0044285	down
RPS21	4.27698e-09	-1.18182	0.000123759	down
RPS24	2.89395e-07	-1.25313	0.00837394	down
RPS26	1.12872e-08	-1.11534	0.000326607	down
RPS27	1.78346e-07	-1.52491	0.00516063	down
RPS28	4.12528e-12	-2.05776	1.19369e-07	down
RPS3	5.03692e-12	-1.61461	1.45748e-07	down
RPS6KA1	1.12741e-08	-1.36107	0.000326228	down
RPS8	1.12884e-09	-1.29495	3.26641e-05	down
RPS9	5.77703e-12	-1.69696	1.67164e-07	down
RPSA	1.4116e-07	-1.20946	0.0040846	down
RRAGC	2.78828e-09	-1.06565	8.06816e-05	down
RSBN1L	2.57359e-07	-1.06624	0.00744693	down
RTEL1	1.17475e-07	-1.16149	0.00339927	down
RTN2	1.50061e-15	-1.49567	4.34218e-11	down
RXRB	3.29211e-12	-1.40273	9.52605e-08	down
RYBP	1.88636e-11	-1.452	5.45838e-07	down
SAMD1	6.61671e-12	-1.26624	1.91461e-07	down
SAP25	1.04382e-06	-1.2797	0.0302041	down
SBF1	3.51586e-09	-1.24089	0.000101735	down
SCAF1	3.01463e-11	-1.36046	8.72313e-07	down
SCAND1	1.61653e-09	-1.6425	4.67758e-05	down
SCAP	2.81454e-10	-1.43283	8.14414e-06	down
SDR42E2	9.02443e-16	-1.37967	2.61131e-11	down
SELENOM	1.6989e-08	-1.60648	0.000491592	down
SELENON	1.42702e-09	-1.22903	4.12922e-05	down
SELENOO	9.10399e-12	-1.38919	2.63433e-07	down
SELENOW	6.02873e-08	-1.38443	0.00174447	down
SEM1	1.09845e-07	-1.23589	0.00317847	down
SEPTIN1	1.13377e-07	-1.23828	0.00328067	down
SESN3	2.64192e-07	-1.18485	0.00764466	down
SETD1A	2.14795e-13	-1.3259	6.2153e-09	down
SETD5	1.62372e-08	-1.17408	0.00046984	down
SH2B1	5.91404e-13	-1.43529	1.71129e-08	down
SH3BP1	9.82997e-10	-1.60146	2.8444e-05	down
SH3BP5L	9.30734e-11	-1.29232	2.69317e-06	down
SH3GL1	1.12923e-10	-1.41859	3.26753e-06	down
SH3GLB2	1.65512e-06	-1.14585	0.0478926	down
SHD	2.27793e-09	-1.40318	6.59142e-05	down
SKIV2L	3.57565e-08	-1.22984	0.00103465	down
SLC15A4	2.99981e-08	-1.05943	0.000868025	down
SLC16A10	7.4762e-15	-1.3571	2.16331e-10	down
SLC16A9	6.64665e-19	-1.3737	1.92328e-14	down
SLC25A29	5.94309e-15	-1.47077	1.71969e-10	down
SLC25A35	3.76671e-11	-1.40173	1.08994e-06	down
SLC27A4	4.22489e-07	-1.1935	0.0122252	down
SLC2A4RG	1.90891e-22	-1.76104	5.52362e-18	down
SLC35D2	1.07373e-15	-1.52526	3.10694e-11	down
SLC39A4	5.69095e-07	-1.19702	0.0164673	down
SLC4A2	1.22687e-11	-1.19755	3.55006e-07	down
SLC52A2	3.19049e-10	-1.35792	9.23199e-06	down
SLC6A3	1.50472e-07	-1.17746	0.00435405	down
SMAP2	9.10693e-07	-1.30118	0.0263518	down
SMARCA4	2.15142e-09	-1.03511	6.22534e-05	down
SMARCD2	6.9348e-16	-1.53116	2.00665e-11	down
SMG5	1.74059e-07	-1.17813	0.00503657	down
SMPD1	6.45888e-14	-1.53509	1.86894e-09	down
SMURF1	9.75542e-10	-1.26114	2.82283e-05	down
SNAI1	6.32996e-20	-1.5077	1.83164e-15	down
SNAPC4	2.05019e-14	-1.31788	5.93244e-10	down
SNCB	7.794e-20	-1.66391	2.25527e-15	down
SNRNP70	1.27055e-11	-1.52312	3.67645e-07	down
SNRPD2	2.54326e-08	-1.43603	0.000735919	down
SNRPE	4.69161e-07	-1.01658	0.0135757	down
SOHLH1	3.0662e-12	-1.55587	8.87235e-08	down
SPHK1	2.39547e-13	-1.53105	6.93152e-09	down
SPINK2	1.34649e-12	-1.81039	3.89621e-08	down
SREK1IP1	3.02771e-12	-1.35429	8.76099e-08	down
SRF	8.51128e-11	-1.59697	2.46282e-06	down
ST14	4.36427e-14	-1.6388	1.26285e-09	down
ST5	1.80158e-08	-1.06396	0.000521306	down
ST6GALNAC6	2.41235e-17	-1.39931	6.98038e-13	down
STAT5B	3.85149e-07	-1.16693	0.0111447	down
STIM2	2.35164e-10	-1.19683	6.80472e-06	down
STIMATE	1.99999e-09	-1.20938	5.78718e-05	down
STK32C	2.62636e-08	-1.20498	0.000759963	down
STK39	3.47337e-12	-1.26136	1.00506e-07	down
STK40	3.58544e-11	-1.44435	1.03748e-06	down
STX4	2.30576e-17	-1.55588	6.67195e-13	down
SUN2	5.18775e-19	-1.54548	1.50113e-14	down
TACC1	6.39086e-08	-1.21688	0.00184926	down
TAF10	1.91807e-07	-1.42723	0.00555013	down
TAF4	1.0842e-08	-1.34345	0.000313723	down
TAGLN	7.82726e-14	-1.66399	2.2649e-09	down
TAOK2	3.81268e-08	-1.36195	0.00110324	down
TCEA2	1.5903e-09	-1.33879	4.6017e-05	down
TCF15	2.72401e-16	-1.69801	7.8822e-12	down
TEAD4	1.02519e-06	-1.01965	0.0296648	down
TEKT5	2.66344e-08	-1.45578	0.000770694	down
TENT5B	6.46365e-07	-1.26921	0.0187032	down
TERF2	4.12049e-16	-1.51491	1.1923e-11	down
TESK1	3.20279e-07	-1.16734	0.0092676	down
TFE3	4.58151e-09	-1.12504	0.000132571	down
TFF3	8.86226e-07	-1.47226	0.0256438	down
TFPT	1.34504e-08	-1.48646	0.000389201	down
TIAF1	2.27476e-13	-1.58328	6.58225e-09	down
TIAL1	2.42963e-11	-1.33972	7.03037e-07	down
TIMM13	1.34778e-09	-1.38901	3.89994e-05	down
TIMP2	3.93187e-11	-1.13372	1.13773e-06	down
TLCD1	1.73635e-07	-1.24184	0.00502431	down
TMA7	5.23522e-09	-1.26121	0.000151486	down
TMEM132D	2.20734e-10	-1.25226	6.38715e-06	down
TMEM160	3.59993e-07	-1.42835	0.0104168	down
TMEM185A	5.13477e-07	-1.05945	0.014858	down
TMEM190	3.01277e-11	-1.73842	8.71774e-07	down
TMEM203	7.19805e-08	-1.25292	0.00208283	down
TMEM259	2.93602e-19	-1.7148	8.49566e-15	down
TMEM51	6.58903e-13	-1.42491	1.9066e-08	down
TMEM8B	1.14018e-11	-1.3734	3.29923e-07	down
TMEM95	9.01367e-11	-1.44092	2.6082e-06	down
TNNT1	1.18697e-11	-1.82527	3.43461e-07	down
TNRC18	5.58561e-07	-1.10662	0.0161625	down
TPBGL	6.58711e-08	-1.31323	0.00190604	down
TPRN	6.3445e-16	-1.66576	1.83585e-11	down
TRAF3IP1	3.0418e-12	-1.20348	8.80176e-08	down
TRAPPC12	5.21094e-08	-1.40843	0.00150784	down
TRAPPC5	9.46346e-08	-1.3929	0.00273835	down
TRAPPC6A	8.23526e-09	-1.33361	0.000238296	down
TRIM28	1.67854e-08	-1.3132	0.000485701	down
TRIO	7.06215e-09	-1.31064	0.00020435	down
TRIOBP	5.52839e-09	-1.07146	0.000159969	down
TRIR	9.03468e-10	-1.5391	2.61428e-05	down
TRPV6	1.23934e-15	-1.36419	3.58614e-11	down
TSPAN4	2.34583e-07	-1.48806	0.00678788	down
TTC9B	1.4411e-10	-1.54512	4.16996e-06	down
TXNIP	4.52899e-25	-3.1708	1.31051e-20	down
U2AF2	3.5295e-09	-1.26758	0.00010213	down
UBA52	5.65007e-09	-1.17207	0.00016349	down
UBALD2	6.60316e-19	-1.71479	1.91069e-14	down
UBE2E1	5.6779e-07	-1.18013	0.0164296	down
UBE2O	1.29605e-07	-1.11717	0.00375026	down
UBE2S	1.37758e-08	-2.10554	0.000398616	down
UBE2Z	6.09296e-07	-1.07224	0.0176306	down
UBL4B	3.94207e-13	-1.4885	1.14068e-08	down
UBL5	6.42927e-09	-1.06522	0.000186037	down
UBQLN4	1.72417e-08	-1.13219	0.000498906	down
UBTD1	1.02659e-16	-1.64927	2.97053e-12	down
UPF1	4.65119e-07	-1.21469	0.0134587	down
UPF2	7.9749e-12	-1.04105	2.30762e-07	down
UQCC3	8.04119e-12	-1.68262	2.3268e-07	down
UQCR	8.39584e-09	-1.4455	0.000242942	down
USF2	8.0758e-16	-1.45016	2.33681e-11	down
VAC14	2.15623e-11	-1.25018	6.23928e-07	down
VPS37B	3.05157e-14	-1.81394	8.83003e-10	down
VRTN	4.92073e-14	-1.79983	1.42386e-09	down
VSTM2L	6.95824e-13	-1.56817	2.01344e-08	down
WBP1	1.43873e-10	-1.35954	4.16311e-06	down
WDR38	3.43448e-08	-1.13679	0.000993802	down
WFDC2	5.75161e-07	-1.64555	0.0166429	down
WIZ	2.18251e-11	-1.50193	6.31532e-07	down
WRNIP1	4.87663e-22	-1.50899	1.4111e-17	down
YBX2	1.04987e-13	-1.48626	3.03789e-09	down
YBX3	7.34628e-17	-1.65412	2.12572e-12	down
YKT6	3.3092e-13	-1.53748	9.57549e-09	down
YPEL1	2.38314e-07	-1.04745	0.00689587	down
YPEL3	3.4672e-12	-1.45573	1.00327e-07	down
ZBTB18	1.64952e-24	-1.58751	4.77305e-20	down
ZCCHC3	1.12495e-12	-1.31755	3.25514e-08	down
ZDHHC18	2.03934e-09	-1.2123	5.90104e-05	down
ZDHHC8	5.79177e-14	-1.55719	1.67591e-09	down
ZFAND2A	3.09053e-07	-1.11851	0.00894275	down
ZFAND3	4.6132e-11	-1.40764	1.33488e-06	down
ZG16	1.40091e-08	-1.34686	0.000405368	down
ZMAT2	3.86336e-13	-1.35209	1.1179e-08	down
ZMIZ2	1.76419e-16	-1.49778	5.10486e-12	down
ZMYND19	1.50244e-10	-1.46216	4.34746e-06	down
ZNF24	6.48991e-08	-1.09538	0.00187792	down
ZNF282	1.76834e-10	-1.35671	5.11687e-06	down
ZNF319	1.66186e-10	-1.39453	4.80876e-06	down
ZNF579	5.16577e-32	-1.9052	1.49477e-27	down
ZNF580	1.19019e-10	-1.36277	3.44394e-06	down
ZNF593	7.44689e-09	-1.71746	0.000215483	down
ZNF598	3.3989e-10	-1.35415	9.83505e-06	down
ZNF628	6.50973e-23	-1.62713	1.88366e-18	down
ZNF768	9.86161e-13	-1.40137	2.85356e-08	down
ZNF775	2.60377e-29	-1.81207	7.53427e-25	down
ZNF787	8.09583e-12	-1.54829	2.34261e-07	down
ZNHIT1	6.74108e-07	-1.28587	0.019506	down
ZNRD2	4.79864e-07	-1.26898	0.0138854	down
ZNRF1	1.35436e-15	-1.48607	3.91899e-11	down
ZSWIM8	1.36549e-11	-1.39477	3.95118e-07	down

## Sheet: GO enrichment of OGV up genes
GO enrichment of upregulated genes in OGV
Category	Term	Count	%	P-value	Genes
GOTERM_BP_DIRECT	GO:0000209~protein polyubiquitination	7	5.26316	0.000234741	NHLRC3, UBE2Q2, LOC700564, RC3H1, UBE2G1, UBE2A, BIRC2
GOTERM_BP_DIRECT	GO:0043161~proteasome-mediated ubiquitin-dependent protein catabolic process	8	6.01504	0.000927782	NHLRC3, LOC700564, PSMD1, UBE2G1, KLHL3, UBE2A, BIRC2, AURKA
GOTERM_BP_DIRECT	GO:0006888~endoplasmic reticulum to Golgi vesicle-mediated transport	5	3.7594	0.00636046	SCFD1, TFG, GOLT1B, TMED2, SEC23B
GOTERM_BP_DIRECT	GO:0007094~mitotic spindle assembly checkpoint signaling	3	2.25564	0.0074778	TTK, SPDL1, MAD2L1
GOTERM_BP_DIRECT	GO:0015031~protein transport	7	5.26316	0.0105928	ATG3, SCFD1, AP5M1, STXBP3, TMED2, NMD3, NUP88
GOTERM_BP_DIRECT	GO:0070936~protein K48-linked ubiquitination	4	3.00752	0.0176161	UBE2G1, KLHL3, UBE2A, SKP2
GOTERM_BP_DIRECT	GO:0006355~regulation of DNA-templated transcription	11	8.27068	0.0193135	MTERF3, GPBP1, ATF7IP2, ZNF766, HBP1, RBBP7, ZNF256, ZNF211, ZNF552, BRDT, ZNF420
GOTERM_BP_DIRECT	GO:0090114~COPII-coated vesicle budding	2	1.50376	0.0246895	VAPA, SEC23B
GOTERM_BP_DIRECT	GO:0045955~negative regulation of calcium ion-dependent exocytosis	2	1.50376	0.0246895	RAP1B, STXBP3
GOTERM_BP_DIRECT	GO:0006281~DNA repair	5	3.7594	0.0252771	DCLRE1A, DCLRE1C, RPA1, UBE2A, ASF1A
GOTERM_BP_DIRECT	GO:0043653~mitochondrial fragmentation involved in apoptotic process	2	1.50376	0.0368067	ATG3, ERBB4
GOTERM_BP_DIRECT	GO:0043066~negative regulation of apoptotic process	6	4.51128	0.0369171	ERBB4, ZFAND6, LOC700564, BIRC2, AURKA, MAD2L1
GOTERM_BP_DIRECT	GO:0051301~cell division	5	3.7594	0.0424107	CCNB3, CCNB1, SPDL1, AURKA, MAD2L1
GOTERM_BP_DIRECT	GO:0031848~protection from non-homologous end joining at telomere	2	1.50376	0.0428092	DCLRE1A, DCLRE1C

## Sheet: GO enrichment of OGV down genes
GO enrichment of downregulated genes in OGV
Category	Term	Count	%	P-value	Genes
GOTERM_BP_DIRECT	GO:0006412~translation	67	7.48603	6.84786e-30	RPL4, RPL32, RPL31, LOC114675582, LOC114669857, RPS15, MRPL41, RPS14, RPL18A, RPS19, LOC706087, LOC706606, RPL36, RPL35, RPL38, LOC703455, RPS11, LOC107000809, RPL39, RPS12, LOC106996191, RPS9, RPL21, LOC714171, RPS8, RPL23, RPL13A, RPSA, LOC718737, LOC114673092, MRPL52, MRPL51, LOC698713, RPL37A, RPL26, RPL29, RPL28, UBA52, LOC703365, RPL12, RPL11, LOC698197, MRPL12, LOC696134, LOC704083, RPS3, …
GOTERM_BP_DIRECT	GO:0002181~cytoplasmic translation	19	2.12291	3.29564e-10	LOC716530, LOC714171, RPL31, RPL35A, LOC697065, RPSA, LOC696134, RPS14, LOC706496, LOC701691, LOC704083, RPL36, RPL38, RPL26, RPL29, RPL18, RPS21, LOC107000809, RPL39
GOTERM_BP_DIRECT	GO:0000028~ribosomal small subunit assembly	10	1.11732	1.41164e-05	RPS15, RPS14, RPS28, LOC701691, RPS27, RPS19, LOC697065, RPSA, LOC710642, LOC100425072
GOTERM_BP_DIRECT	GO:0006468~protein phosphorylation	30	3.35196	0.000603998	TRIO, STK39, TESK1, NLK, ABR, GRK3, GRK2, RPS6KA1, CSK, MARK4, MAP2K7, FNIP2, STK32C, MARK2, MAPK3, PAK4, MAP4K1, EPHA4, MAP3K3, MAP2K2, CSNK2A2, MAPK12, BCR, PINK1, TAOK2, PKN1, CDK13, MAP3K11, STK40, FGFR1
GOTERM_BP_DIRECT	GO:0001701~in utero embryonic development	17	1.89944	0.00129129	MBD3, AXIN1, PTH1R, YBX3, TERF2, MAPK8IP3, KLF2, CMIP, CAMSAP3, MOSMO, KAT2A, BCL2L11, RDH10, ANKS6, CCM2, BAP1, FGFR1
GOTERM_BP_DIRECT	GO:0035264~multicellular organism growth	11	1.22905	0.00195018	CDKN1C, SELENOM, KAT2A, PPP1R13L, TAF10, PTPN11, CCM2, ATF5, STK40, KLF2, FOSL2
GOTERM_BP_DIRECT	GO:0045893~positive regulation of DNA-templated transcription	21	2.34637	0.00334194	CDKN1C, INO80E, MAP2K2, PTGES2, SRF, TFE3, KMT2B, MAZ, MLLT1, FOXK1, GDF6, MT3, TFPT, RYBP, BAMBI, DEAF1, RPS6KA1, SNAI1, SCAND1, RNF187, CREB5
GOTERM_BP_DIRECT	GO:0032981~mitochondrial respiratory chain complex I assembly	8	0.893855	0.00449712	NDUFAF8, NDUFA6, NDUFB7, NDUFB10, NDUFA11, NDUFB11, NDUFA2, LOC114669847
GOTERM_BP_DIRECT	GO:0032480~negative regulation of type I interferon production	5	0.558659	0.00498747	ILRUN, RNF125, NPLOC4, TRAF3IP1, PTPN11
GOTERM_BP_DIRECT	GO:0035556~intracellular signal transduction	25	2.7933	0.00624762	MAST2, STK39, NLK, ABR, DVL1, RPS6KA1, MARK4, PAG1, STK32C, MARK2, MAPK3, SH2B1, PAK4, MAP4K1, MAP3K3, AZU1, MAPK12, BCR, PINK1, SH3BP5L, PPP1R1A, MAPKAPK2, PKN1, CAMK1, ASB2
GOTERM_BP_DIRECT	GO:0060425~lung morphogenesis	4	0.446927	0.0099818	SRF, MAPK8IP3, STK40, MAPK3
GOTERM_BP_DIRECT	GO:0045820~negative regulation of glycolytic process	4	0.446927	0.0150586	HDAC4, CBFA2T3, FBP1, GIT1
GOTERM_BP_DIRECT	GO:0010269~response to selenium ion	3	0.335196	0.0174357	SELENOM, GPX1, SELENOW
GOTERM_BP_DIRECT	GO:0090200~positive regulation of release of cytochrome c from mitochondria	4	0.446927	0.0180493	PINK1, BCL2L11, BIK, BBC3
GOTERM_BP_DIRECT	GO:0002076~osteoblast development	4	0.446927	0.0180493	HDAC4, JUND, PTH1R, LIMD1
GOTERM_BP_DIRECT	GO:0045785~positive regulation of cell adhesion	5	0.558659	0.0212945	EPHA4, LDB1, TFE3, STX4, AZU1
GOTERM_BP_DIRECT	GO:0006351~DNA-templated transcription	8	0.893855	0.0215088	TEAD4, TCEA2, E2F1, POLR2F, TAF4, CBFA2T3, MAPK3, POLR2L
GOTERM_BP_DIRECT	GO:0043583~ear development	3	0.335196	0.0238362	BCL2L11, TCF15, RDH10
GOTERM_BP_DIRECT	GO:1901381~positive regulation of potassium ion transmembrane transport	3	0.335196	0.0238362	KCNQ1, AMIGO1, FLNA
GOTERM_BP_DIRECT	GO:0035855~megakaryocyte development	4	0.446927	0.0249477	GP9, MPIG6B, SRF, PTPN11
GOTERM_BP_DIRECT	GO:0007605~sensory perception of sound	10	1.11732	0.0284549	GPX1, EBI3, AXIN1, STX4, RPL38, COCH, TRIOBP, PDZD7, FGFR1, TPRN
GOTERM_BP_DIRECT	GO:0045892~negative regulation of DNA-templated transcription	16	1.78771	0.0290052	MESP1, RING1, DNMT3A, ZNF24, CBFA2T3, HNRNPL, NCOR2, TRIM28, BASP1, BAHD1, NACC1, ATF5, SAMD1, PITX1, PFDN5, BAP1
GOTERM_BP_DIRECT	GO:0000122~negative regulation of transcription by RNA polymerase II	37	4.13408	0.0359878	HDAC4, CDKN1C, KANK2, LDB1, MAZ, LOC114674074, YBX3, IRF2BPL, GLIS2, MECP2, RPS14, MTA1, TRIM28, PPP1R13L, E2F1, LOC720251, ZNF787, MYOZ1, SAMD1, FNIP2, MBD3, JUND, MBD2, DNMT3A, DAB2IP, KLF2, NCOR2, HIC2, KAT2A, IFI27, ID1, PHF14, ID3, TXNIP, CPEB3, FGFR1, ATF4
GOTERM_BP_DIRECT	GO:0001947~heart looping	6	0.670391	0.0377589	MESP1, SRF, IFT172, DVL1, ASB2, ENG
GOTERM_BP_DIRECT	GO:0006367~transcription initiation at RNA polymerase II promoter	5	0.558659	0.0387379	TAF10, MAZ, ELOB, TAF4, GTF2F1
GOTERM_BP_DIRECT	GO:1905907~negative regulation of amyloid fibril formation	3	0.335196	0.0389725	PFDN2, PFDN5, PFDN6
GOTERM_BP_DIRECT	GO:0048339~paraxial mesoderm development	3	0.335196	0.0389725	TCF15, FGFR1, DLL3
GOTERM_BP_DIRECT	GO:0039702~viral budding via host ESCRT complex	4	0.446927	0.0423912	CHMP2A, CHMP4B, VPS37B, CHMP6
GOTERM_BP_DIRECT	GO:0001678~intracellular glucose homeostasis	4	0.446927	0.0423912	FOXK2, NUCKS1, FOXK1, FOXA3
GOTERM_BP_DIRECT	GO:0045599~negative regulation of fat cell differentiation	5	0.558659	0.0459327	TRIO, E2F1, AXIN1, LRP3, C1QL4
GOTERM_BP_DIRECT	GO:0051258~protein polymerization	3	0.335196	0.0475814	CHMP2A, CHMP4B, DNM2
GOTERM_BP_DIRECT	GO:0010458~exit from mitosis	3	0.335196	0.0475814	UBE2S, CHMP2A, CHMP4B
GOTERM_BP_DIRECT	GO:0043248~proteasome assembly	3	0.335196	0.0475814	SEM1, PSMG3, PSMG4
GOTERM_BP_DIRECT	GO:0008360~regulation of cell shape	9	1.00559	0.049996	DIAPH1, BAMBI, TAOK2, PALM3, CDC42EP1, PLEKHO1, ARAP1, LIMD1, COCH
