# Supplementary material
Source: Research Square preprint supplement (doi:10.21203/rs.3.rs-7771199/v1)
Supplement: Supplementary file 14 [file cc9ca8d50e84d29b700b49b1.xlsx]

## Sheet: Co-expression modules of GV
Co-expression modules of GV from different age groups
Module 1	Module 2	Module 3	Module 4	Module 5	Module 6	Module 7	Module 8
A4GALT	ALKBH2	ACOT13	ACLY	AAR2	ABRAXAS1	AMD1	ABCA5
AAMDC	ALKBH7	ADK	ACTL6A	ABHD13	ACAP2	ARFIP1	ABCC5
ABCC1	AMDHD2	APOC1	ADPGK	ABHD16A	AFF4	ARL6	ABCD3
ACAA1	ANAPC15	ARHGEF10L	AFAP1L2	ABHD2	AKAP8L	ARL6IP1	ABHD3
ACADS	ANKRD53	ARL6IP4	AFF2	ABI2	ALG13	AZIN1	ABHD5
ACTR1B	ARFRP1	ARMC7	AGL	ABRAXAS2	ARHGAP12	CEP44	ABI3BP
ADAD2	ARHGEF18	ATOX1	ALDH9A1	ACADVL	ARL5A	CLK1	ABO
ADAMTSL3	ATG7	ATP5F1E	ANKRD46	ACER3	ASZ1	CNOT2	ACACA
ADCK2	ATP5F1D	ATP5IF1	ANKRD52	ACOX1	ATAD2B	CSDE1	ACAD11
ADCY9	ATP6V0C	ATP5MC2	ANO10	ACSL1	ATP2B1	CYP2C93	ACCSL
ADGRG3	AVPI1	ATP5ME	AP1M2	ACTB	B3GNT2	CYTIP	ACSL3
AGAP3	BCAS4	ATP5MG	AP2B1	ACTR5	BCAS1	DDX43	ACTN4
AGFG2	BCL2L12	ATP5MPL	AP3M2	ALAS1	BRCA2	DNAJA1	ACVR2A
AGK	BFSP2	B9D1	API5	ALDH2	C10H20orf194	EXO1	ADAM10
AGPAT1	BIN3	B9D2	ARFGAP3	ANAPC7	C6H5orf51	FAM214A	ADAMTS3
AIMP1	BOLA1	BCAP31	ARMC9	ANKRD27	CA12	FBXO5	ADD3
AKAP17A	BORCS8	BMS1	ARNT	ANKRD42	CCDC186	GFM2	AGBL2
AKNA	BRMS1	BOLA2B	ATP6AP2	ANKRD6	CCNT1	GNPDA2	AGGF1
AKT1S1	C11H12orf10	BORCS7	ATP6V0A1	AP1G1	CCNT2	GTF2H1	AGTPBP1
ALKBH5	C11H12orf74	BRD9	B3GNT3	AP2M1	CCT6A	KIF2C	AHSA1
AMFR	C15H9orf16	C11H12orf57	BBS2	APBB2	CGNL1	LOC106992311	AKAP11
AMIGO1	C16H17orf49	C1H1orf122	BRCC3	ARF1	CHD2	LOC114670813	AKIRIN2
ANKH	C19H19orf24	C6H5orf49	C1H1orf43	ARFGAP2	CHFR	LOC713332	AKT3
ANKLE2	C1H1orf35	CATSPERD	C20H16orf70	ASB7	CHP1	LOC717463	ALDH1A2
ANKS1A	C3H7orf50	CCDC102A	C5H4orf46	ASH2L	CLCN3	MAEL	ALDH6A1
AP1AR	C7H15orf61	CCDC113	C9H10orf88	ASNS	CLOCK	MGAT4A	ALG2
AP1B1	CARHSP1	CCDC12	CALU	ATG16L1	CMPK1	MINDY3	ALKBH1
AP2A2	CBY3	CCDC146	CAP1	ATIC	CMTM6	MRE11	ALOX15
AP3D1	CCDC107	CCDC24	CAPRIN1	ATL3	CNOT1	MTM1	AMPD3
AP3S1	CCDC3	CCDC34	CBLL1	ATP10B	CNST	MTRR	ANGEL1
APLP2	CCNO	CD164L2	CCDC47	AUNIP	COBLL1	NCAM2	ANKFY1
ARAP1	CD2BP2	CDCP2	CCDC91	AVL9	CPEB4	NUDCD1	ANKRD26
ARAP3	CDPF1	CDKN1C	CD9	BCCIP	CRCP	NUDT21	ANO6
ARF3	CERCAM	CEP131	CDH17	BCKDK	CTR9	OCIAD1	AP1S2
ARHGAP10	CFAP410	CFAP206	CHRNE	BHLHB9	CTTNBP2NL	PACRGL	AP3B2
ARHGAP27	CHST12	CFDP1	CIP2A	BMP5	CUL5	PIK3C3	APH1A
ARHGAP30	CLEC10A	CHCHD1	CLASP2	BNIP3	DAAM1	PIK3CA	ARAP2
ARHGAP35	CLPP	CHCHD8	COL4A3BP	BRAF	DCP1A	RNF185	ARCN1
ARHGAP44	CLTA	CHMP3	COPB1	BUB1	DCP2	ROS1	ARFGEF3
ARHGDIA	COPE	CISD1	COPG1	BZW2	DCUN1D1	RPE	ARHGAP18
ARHGEF16	COX5A	CISD3	CPEB1	C11H12orf75	DICER1	SLC16A1	ARID4B
ARL4C	CRACR2B	CLPSL2	CREG1	C15H9orf78	DIP2B	SNX16	ARIH2
ARPC2	CSTB	CMC2	CUL4A	C16H17orf53	DPP8	SOAT1	ARL13B
ARRDC2	CYB561D2	CMC4	DBR1	C1H1orf112	DPY19L3	SRP54	ARL2BP
ASPHD2	CYB5A	COA5	DCUN1D5	C9H10orf82	DYNC1LI2	TGDS	ARL6IP6
ASTL	CYREN	COMMD1	DDX20	CABYR	EMC1	TMPRSS2	ARL8B
ASXL1	DBI	COPS9	DERL1	CALCOCO2	EMSY	TUSC3	ARMC1
ATF4	DCTN3	COX17	DGKI	CAPN7	ERCC6	USP14	ASB3
ATF5	DNAJC17	COX19	DHX40	CARS	ERV3-1	WDR41	ASB8
ATG101	DNAJC4	COX6B1	DIDO1	CASP9	F11R	ZNF155	ASPH
ATG14	DPP6	COX6C	DIMT1	CCDC43	FAM104B		ASXL3
ATG4D	DSCAML1	CPSF4L	DLGAP1	CCDC93	FAM13B		ATAD2
ATP13A1	E2F4	CRYBB3	DNAJC10	CCNB1IP1	FAT1		ATAD5
ATP5F1C	ECHDC2	CTDP1	DNAJC3	CD40	FIGNL1		ATF1
ATP5PF	EEF2KMT	CUTA	DYM	CDCA7L	FRMD4B		ATF2
ATPSCKMT	EIF3G	DDIT3	EFTUD2	CENPT	FRS2		ATF7
ATRIP	ETHE1	DMAC1	ENOPH1	CFL2	FUBP1		ATF7IP
ATXN7L2	EXOSC4	DNAAF4	ENPP5	CHIC2	GAB1		ATG13
AURKAIP1	FAAP20	DOCK6	ERI1	CHMP7	GATM		ATG2B
AXIN1	FAM120C	EBPL	ESRP1	CHST4	GGA3		ATL2
B3GNT4	FAM241B	EDF1	FAM49B	CIAO2B	GIGYF2		ATP5PB
B4GALT2	FAM50A	EEF1A1	FBXL21P	CIDEC	GMEB1		ATRX
BACE2	FAM53B	EEF1B2	FBXO15	CKAP5	GPAM		AUH
BAP1	FIGLA	EEF1D	FGFR1OP2	CNN2	GPCPD1		AVEN
BAX	FKBPL	EIF2B5	GATC	COMMD8	GPD2		AZI2
BAZ1B	FMC1	EIF3B	GFPT1	COPG2	GPR63		B4GALT3
BBS10	FPGS	ELOC	GFPT2	COQ2	GRB2		BACH1
BCAR1	FSTL4	ENKD1	GINM1	CPSF6	HCFC2		BAG1
BCKDHB	FTL	EPB41L4A	GLB1	CTPS1	HECTD1		BANP
BCL6B	FUNDC2	ERICH5	GLE1	CYCS	HIVEP1		BARD1
BCR	GADD45GIP1	ESRRA	GNB3	CYFIP1	HMGXB4		BARX2
BECN1	GALK1	EXOSC6	GNS	DCAF4	HUWE1		BBS12
BICD2	GCSH	FABP5	GORASP2	DDX39B	IL1RAPL1		BBS7
BRD1	GFRA1	FAM126A	GPHN	DDX5	IPO7		BCL10
BRD4	GMDS	FAM173A	GPM6B	DECR2	ISY1		BCL2L10
BRI3	GP9	FAM200A	GRM4	DHDDS	ITSN2		BCL2L13
BRIP1	GPANK1	FAU	GTF3C2	DNAJA3	JMJD1C		BCL6
BTBD2	GPX4	FDX2	HERC3	DNAJC14	KDM4A		BCLAF1
C11H12orf40	GRPEL1	FKBP2	HIBADH	DND1	KDM5A		BDH1
C11H12orf49	GSTZ1	FTH1	HIF1A	DYNC2LI1	KIF1B		BEND4
C11H12orf73	GTF3C1	FTHL17	HLCS	EARS2	KIF3A		BFAR
C14H11orf49	GUK1	GABARAP	HNRNPF	ELMO1	KLHDC2		BHMG1
C15H9orf43	HCRTR2	GLRX5	HPS3	ELMO2	KLHL8		BIRC2
C2CD6	HDHD3	GMFG	HPS5	EMC2	LCA5		BLCAP
C3H7orf26	HIP1R	GRM7	HSDL1	EMC7	LCOR		BLM
C4H6orf52	HIST2H2AC	GTF2F1	ICE2	EPB41L5	LDLRAD3		BLOC1S5
C4H6orf89	HS1BP3	H2AFJ	IFNAR2	ERGIC3	LIN7C		BLVRA
CA10	HSD11B1L	HAUS8	IFT57	EXOC3	LOC100423287		BMP15
CA5A	HSPBP1	HCFC1R1	INTS10	FAM126B	LOC100424371		BMP2K
CABLES2	IMP3	HDGFL2	KIF16B	FAM151B	LOC106997478		BMPR1B
CACFD1	IP6K1	HIGD2A	KIF27	FANCG	LOC107000705		BNIP1
CACNA1A	JMJD8	HIST1H2BK	KLHL12	FARP2	LOC694126		BORA
CACNG7	KAT2A	HNRNPD	KPNA1	FBXO7	LOC720388		BRCA1
CACTIN	KDF1	HSF4	LAMB4	FH	LUZP1		BRD2
CALR	KIAA1614	HSPE1	LCMT2	FIP1L1	LYSMD3		BRD3OS
CAMK1	KLK15	IL17B	LHX8	FKBP4	MAN1A2		BRINP1
CAMSAP3	LEPROTL1	ING3	LINS1	FKBP9	MAP4K4		BUB1B
CAPN1	LOC106992546	KRT10	LOC114669760	FN3KRP	MAPK14		BUD13
CAPN10	LOC106992810	LAMP2	LOC114674660	FNTB	MAVS		C11H12orf4
CAPRIN2	LOC106993916	LAMTOR5	LOC694388	FOXRED1	MBTD1		C1H1orf52
CARS2	LOC106994941	LIMS2	LOC701819	FSD1	MED13L		C20H16orf74
CASKIN1	LOC106995403	LMBRD1	LOC705178	FUCA2	MIGA1		C20H16orf87
CCDC120	LOC106996082	LOC100424768	LOC705884	FXR1	MMGT1		C2CD3
CCDC69	LOC106996457	LOC100424957	LOC710661	GDE1	MRFAP1L1		C2CD5
CCDC9	LOC106997434	LOC100427362	LOC714758	GDPGP1	MSL2		C4H6orf203
CCDC92	LOC106999065	LOC100430397	LOC716070	GHITM	MTMR12		C5H4orf19
CCM2	LOC106999143	LOC100430669	LOC719221	GLO1	MTMR8		C6H5orf15
CCNDBP1	LOC106999575	LOC106992872	LOC720434	GLUD1	MTX3		C9H10orf90
CCNQ	LOC107000678	LOC106992878	LOC720588	GMPR2	MYSM1		C9orf72
CCNY	LOC114669964	LOC106993224	LOC722582	GMPS	NCAPD3		CAAP1
CD276	LOC114670565	LOC106993547	MASTL	GPR160	NCBP3		CACNA1E
CD6	LOC114672332	LOC106993589	MPEG1	GSDME	NEMP1		CALCOCO1
CD82	LOC114672760	LOC106993764	MSH3	HERC5	NSA2		CAMK2G
CDC25B	LOC114672798	LOC106993955	MSH6	HHLA2	NSD3		CAMKK2
CDC34	LOC114673052	LOC106994120	MTA2	HJURP	NUP214		CAPN13
CDC42BPB	LOC114673436	LOC106994133	MTMR6	HNRNPH3	OTULINL		CASP2
CDC42EP5	LOC114673730	LOC106994355	MUS81	HPS4	PDE3A		CASP8
CDIPT	LOC114674425	LOC106994640	MYO1E	HSD17B4	PDE8B		CASP8AP2
CDKN2D	LOC114675047	LOC106994910	NAA50	HSPA4	PHACTR4		CBFB
CDR1	LOC114675467	LOC106995063	NAPG	HSPA8	PHF6		CCAR1
CDS1	LOC114675480	LOC106995270	NARS2	HSPA9	PHTF2		CCDC117
CDT1	LOC114675716	LOC106995957	NCSTN	IDI1	PIK3C2A		CCDC14
CEP104	LOC114676029	LOC106995978	NDST1	INPP5B	PIK3R3		CCDC149
CFAP20	LOC114676060	LOC106996000	NFXL1	IPPK	PIKFYVE		CCDC15
CHAF1A	LOC114676893	LOC106996191	NKIRAS2	IQCC	POC5		CCDC150
CHCHD7	LOC114677040	LOC106996346	NMNAT3	IQCE	POLR1A		CCDC170
CHD1	LOC114677357	LOC106997972	NR2C1	ITGBL1	PPME1		CCDC171
CHD4	LOC114677388	LOC106998255	NSF	ITM2C	PPP1R12B		CCDC18
CHERP	LOC114677510	LOC106998533	NUMB	KAT7	PPTC7		CCDC25
CHMP4B	LOC698520	LOC106998836	NUP54	KCNH1	PRKAR2A		CCDC82
CHMP5	LOC703593	LOC106998903	OSBPL1A	KCNK9	RAB29		CCDC87
CHRDL2	LOC704637	LOC107000414	OSBPL9	KIF14	RACGAP1		CCDC97
CHTF18	LOC706967	LOC107000783	PBLD	LAS1L	REST		CCNA2
CIRBP	LOC714689	LOC107000909	PDE12	LDHAL6A	RHBDD1		CCNG1
CLN6	LOC716074	LOC107000979	PDIA6	LMNA	RICTOR		CCNJ
CLPTM1L	LOC720839	LOC114669718	PDPN	LOC100424218	RIF1		CCNL1
CLTB	LONP1	LOC114669847	PDXDC1	LOC100425528	RPRD2		CCP110
CLUH	LOXL1	LOC114669857	PELI1	LOC100426750	RRN3		CCSER2
CMTM8	LPCAT4	LOC114670022	PIGO	LOC106994381	RRP1B		CCZ1
CNNM3	LRRC8A	LOC114671035	PIP4K2C	LOC106994695	RSPRY1		CDADC1
CNPY4	LSM10	LOC114671073	PISD	LOC106995779	SAFB		CDC16
CNTLN	MACROD1	LOC114671087	PIWIL1	LOC106997747	SAFB2		CDC40
COASY	MAP1LC3A	LOC114671097	PLAA	LOC114673026	SBNO1		CDC42
COBL	MCRIP1	LOC114671453	PLEKHA1	LOC114674310	SERINC3		CDC42BPA
COL18A1	MCRIP2	LOC114671522	PLEKHB2	LOC114675318	SHPRH		CDC42SE1
COL28A1	MED19	LOC114671716	PNPO	LOC114675589	SLAIN2		CDC45
COPS8	MEIKIN	LOC114671777	PPT1	LOC697254	SLC30A6		CDC5L
CORO1B	MFSD2A	LOC114672161	PSME3	LOC702465	SLC36A1		CDCA7
COX7B	MGMT	LOC114672179	PSPH	LOC705465	SLC39A14		CDCA8
CPLANE2	MOS	LOC114672678	PUS7	LOC708686	SLC4A7		CDCP1
CPNE2	MRPL11	LOC114672822	PXK	LOC709314	SMC1A		CDH1
CPSF1	MRPL12	LOC114672990	RAB2B	LOC715684	SP1		CDH18
CRAMP1	MRPL24_1	LOC114674200	RAB4A	LOC722074	SPECC1		CDH3
CRIM1	MRPL34	LOC114674287	RAB5B	LOC722786	SPECC1L		CDK7
CRTC1	MRPL4	LOC114675525	RAB6A	LRCH3	SREK1		CDKN2B
CSDC2	MRPS12	LOC114675582	RB1CC1	LRRC59	SUSD6		CDR2
CSK	MRPS2	LOC114675993	RCBTB1	MARS	TAF5		CDS2
CSNK1D	MRPS24	LOC114676059	RCN2	MCM4	TAF5L		CEBPG
CSNK1G2	MRPS26	LOC114676829	RGMB	MCM9	TBCCD1		CEP120
CSRNP2	MTFP1	LOC114676998	RHOA	MCTP2	TFDP1		CEP128
CSTF2	MTG1	LOC114677460	RP2	MED17	TGOLN2		CEP135
CTDNEP1	MYL6B	LOC114677531	RTL10	MED21	THOC2		CEP57
CTNNBIP1	NAA10	LOC114678374	SAMHD1	MEFV	TIA1		CEP63
CTRB2	NCK2	LOC114678805	SEC23IP	METTL23	TIPARP		CEP83
CXHXorf56	NDUFB11	LOC114678831	SERTAD3	METTL6	TMEM169		CEP85
CYHR1	NDUFS3	LOC114679578	SH3BP5	MFF	TNKS2		CEP95
CYP2C18	NELFE	LOC114680233	SHQ1	MICU2	TNPO2		CEP97
CYP2F1	NINJ2	LOC114680284	SKA1	MLYCD	TP63		CERS2
CYTH1	NME3	LOC114680325	SLC35F5	MRC1	TRIM23		CETN3
DAB2IP	NME4	LOC114680393	SLC39A6	MRPL19	TRPM7		CGGBP1
DAGLB	NOL4L	LOC114680572	SLC6A20	MRPS9	TSHZ2		CHAC2
DAW1	NOL7	LOC693506	SLC9A6	MTMR14	UGCG		CHAMP1
DAZAP1	NOSIP	LOC693947	SLC9A8	MTRF1	UNC13B		CHD7
DCAF15	NR2C2AP	LOC694228	SMIM14	MTRF1L	USP37		CHGB
DCBLD1	NT5C	LOC694712	SMURF2	MYO3B	USP40		CHMP2A
DCTN1	NUBP2	LOC694887	SNX19	NAA40	USP45		CHMP2B
DDR1	NUDT14	LOC695218	SPG21	NCK1	USP53		CHMP6
DDRGK1	NUDT16	LOC695327	SPRYD3	NCKIPSD	UXS1		CINP
DDX46	NUDT22	LOC696151	SPTSSA	NCOA4	VEZF1		CIPC
DDX54	OPA3	LOC696423	SUGP2	NECTIN2	VPS35		CLCC1
DEAF1	ORAI1	LOC696801	SUMF1	NFS1	WDR33		CLCN5
DENND1A	OXLD1	LOC697065	SYVN1	NIPSNAP1	XIAP		CLDN12
DGAT1	PAGR1	LOC697476	TAF9B	NLRP5	XRN1		CLEC16A
DGCR8	PARVA	LOC698075	TBC1D5	NLRP8	YEATS2		CLINT1
DHX30	PAXX	LOC698130	TBK1	NLRP9	YES1		CLIP4
DHX34	PDAP1	LOC698143	TM9SF4	NRBP1	ZBTB21		CLN3
DHX38	PDCD2L	LOC698197	TMEM245	NUP133	ZBTB43		CLPX
DIAPH1	PDLIM7	LOC698297	TMEM39A	NXPH1	ZCCHC2		CMAS
DISC1	PDZRN3	LOC699053	TPGS2	ODF2	ZFYVE9		CMSS1
DMWD	PHOSPHO1	LOC699110	TPK1	OGT	ZHX2		CMTR1
DNAAF5	PIGH	LOC699117	TRIM4	OPTN	ZMYND11		CNBP
DNAJB2	PINX1	LOC699693	UBAC2	OSBPL10	ZNF236		CNOT10
DNAJC21	PKNOX2	LOC700019	UBE2A	OSTF1	ZNF326		CNOT4
DNMBP	PLEKHG1	LOC701084	UBQLN1	PAFAH2	ZNF331		CNOT7
DNMT3A	PLPP4	LOC701223	UGDH	PDCD6IP	ZNF407		CNRIP1
DNMT3B	POLE4	LOC701691	USO1	PDSS1	ZNF430		CNTRL
DONSON	POP7	LOC702606	USP33	PEX19	ZNF451		COG1
DPPA5	PPIF	LOC703026	USP9X	PGS1	ZNF460		COG7
DUPD1	PRKCSH	LOC703455	VAMP7	PIGV	ZNF680		COPA
DUS2	PRR19	LOC704012	VCPKMT	PKD1L3			COQ10B
DUSP12	PSMB5	LOC704238	VPS37A	PKM			COX11
DUSP16	PSMG3	LOC704345	YIPF4	PKNOX1			CPSF2
DUSP7	PTRH1	LOC704394	ZNF254	PLA2G15			CRTAM
DUXB	PUSL1	LOC704640		PLK3			CRY1
DVL1	PYGM	LOC705310		PNMA1			CRYBG3
DVL3	R3HCC1	LOC705400		POLR3F			CS
DYNLL1	RAB1B	LOC706177		PPP1R2			CSMD3
DYNLL2	RAB40C	LOC706340		PRKAG1			CSNK1G1
E2F1	RAP1GAP	LOC706366		PRMT3			CSNK1G3
ECPAS	RASA4B	LOC706496		PRMT5			CTDSPL2
ECSIT	RBKS	LOC706532		PRPSAP1			CTSD
EDC4	RIMBP2	LOC707227		PSMC4			CTTN
EEF1E1	RIN3	LOC707437		PTGR2			CUX1
EEF2K	RNF113A	LOC708096		RAB3B			CWC25
EFHD2	RPL13	LOC709045		RAB3D			CWF19L1
EFNB3	RPL8	LOC709769		RBM33			CXCR2
EHD1	RUVBL2	LOC710189		RDH14			CXHXorf38
EHMT2	SCAND1	LOC710274		RFT1			CYB5B
EI24	SDF2L1	LOC710317		RILPL2			CYP2C76
EID2	SDHAF1	LOC710665		RIPK2			DAB1
EIF2AK4	SEMA4B	LOC710682		RMDN3			DAG1
EIF4E1B	SEPTIN1	LOC711174		RPUSD2			DARS
EIF4ENIF1	SGF29	LOC711695		RPUSD4			DAXX
EIF5B	SHARPIN	LOC711760		RUFY1			DAZL
ELK1	SHKBP1	LOC712987		RWDD2A			DBH
ELL	SIAH3	LOC713024		SCFD2			DCAF1
ENDOG	SIL1	LOC713714		SENP5			DCAF12
ENG	SLC27A1	LOC714171		SESN1			DCAF16
ENHO	SLC35C1	LOC714576		SETDB2			DCAF4L1
ERCC2	SMPD2	LOC714598		SF3B3			DCAF4L2
ERF	SPACA9	LOC714620		SGTB			DCHS2
ERG28	SPDYC	LOC716530		SH3GLB1			DCK
ERICH2	SURF2	LOC717831		SLC1A2			DCLRE1B
ERP29	TAX1BP3	LOC718737		SLC25A51			DCLRE1C
ETV5	TCL1B	LOC718775		SLC35B4			DCT
EYA3	TECR	LOC718979		SLC35G2			DCTD
FAAP100	TFPT	LOC719242		SLC41A2			DCTN4
FAM102A	THAP11	LOC719947		SLC6A16			DDX17
FAM114A2	THAP7	LOC720015		SND1			DDX28
FAM129B	THEG	LOC720019		SNRPN			DDX42
FAM168A	TIMM44	LOC720748		SPRYD7			DDX58
FAM207A	TLE2	LOC721751		SPTLC1			DDX59
FAM219A	TMEM147	LOC721815		SRP68			DEK
FAM220A	TMEM179B	LRPAP1		SRPRA			DENND1C
FAM98B	TMEM187	LRRC46		SRPRB			DENND4C
FBL	TMEM231	LSM3		STAT3			DEPDC7
FBRS	TMUB1	LSM5		STT3A			DFFA
FBXL6	TRAPPC5	LSM7		SYT14			DHCR7
FBXO10	UBE2J2	LY75		TCP11			DHTKD1
FBXO24	UBE2L6	LYPD6		TCTN1			DHX33
FBXO45	UBL7	MAN2B1		TCTN3			DHX35
FBXW4	UBXN1	MAP4K1		TESK2			DHX57
FGF13	UROD	MEA1		TMCC3			DIRAS2
FGFR1	VAMP2	MEPCE		TMEM183A			DIXDC1
FGFRL1	WDR18	MESP1		TMEM241			DKC1
FLNA	WDR34	MISP3		TMEM43			DLAT
FLNB	WDR74	MOCS2		TMEM87A			DLG1
FNDC10	WWOX	MPHOSPH8		TMEM9B			DMD
FOXA3	YDJC	MRPL20		TOR1A			DMRTC2
FOXK2	YIPF2	MRPL23		TRAF3IP2			DMXL1
FOXO3	ZFAND2B	MRPL24		TRAF5			DNA2
FOXP4	ZNF524	MRPL27		TRAF7			DNAAF2
FXR2		MRPL33		TRIM3			DNAH11
FZR1		MRPL53		TRMT1L			DNAJA4
GAB4		MRPS21		TTC17			DNAJC27
GABRA5		MTLN		TUFT1			DPF1
GAK		MYH13		TXNL1			DPF2
GAL		MYH15		UAP1			DPP10
GAL3ST1		NACA		UBE2D2			DPP3
GALNT2		NCBP2		UBE2W			DPPA3
GAS6		NDUFA1		ULK3			DTL
GAST		NDUFA11		UNC93A			DTNB
GATAD2A		NDUFA13		UPB1			DTWD1
GBX1		NDUFA2		USP4			DTWD2
GBX2		NDUFA6		VAMP3			DUSP18
GGA1		NDUFAF2		VCP			DZIP1
GGT1		NDUFAF8		VPS11			DZIP3
GGT7		NDUFB1		VPS16			EDAR
GID4		NDUFB2		VPS4A			EDEM2
GIPC1		NDUFB3		VPS50			EDRF1
GIT1		NDUFB4		VRK3			EFCAB14
GJC1		NDUFB6		WDFY2			EHBP1
GKAP1		NDUFB7		WIPI1			EIF2AK1
GLIS2		NDUFC1		WWC2			EIF2B1
GLP2R		NDUFS5		XPO5			EIF4A2
GNB2		NDUFS6		ZBTB37			EIF4B
GOLGA7		NDUFS8		ZDHHC16			EIF4G2
GOLIM4		NDUFV3		ZFP69			ELOVL4
GPAT4		NEFH		ZFP69B			ELOVL5
GPR137		NLN		ZNF121			ENTPD5
GPR137B		NME1		ZNF16			ENTPD7
GPR153		NUDT1		ZNF225			EPB41L2
GPR161		OARD1		ZNF274			EPC1
GRAMD1A		PABPC4		ZNF3			EPM2AIP1
GRAMD1B		PALM3		ZNF34			EPN2
GRB10		PAM16		ZNF345			ERCC6L
GRB7		PARP2		ZNF397			ERLEC1
GRIK4		PDCD5		ZNF416			ERLIN1
GRSF1		PDLIM1		ZNF501			ERP44
GSK3A		PET100		ZNF589			ERRFI1
GSN		PFDN2		ZNF749			ESCO1
GTF3C4		PFDN5		ZNF77			ESCO2
HABP4		PGPEP1L		ZNF8			ESYT3
HBEGF		PIGN		ZSCAN29			ETNK1
HCN4		PLSCR3					EVI5
HCST		POLR2F					EXD1
HDAC11		PPP1R1A					EXD2
HDGFL3		PPP2R2D					EXOC5
HECA		PQLC3					EYA1
HES6		PRLHR					FADS1
HIC2		PSENEN					FADS3
HIGD1A		PTER					FAF1
HMGXB3		RAD9B					FAM120AOS
HNRNPUL2		RBCK1					FAM135A
HSP90AA1		RBIS					FAM160A1
HSP90B1		RBM34					FAM161A
HTT		RBPMS					FAM161B
IER2		REPIN1					FAM169A
IER5		RESP18					FAM172A
IFT172		RFNG					FAM174A
IFT88		RFTN1					FAM222B
IGFALS		RHBDD3					FAM228B
IL3RA		RIIAD1					FAM76A
IL4I1		RNF126					FAM83D
ILRUN		RNF146					FANCM
ING2		RNF187					FBXL18
INO80E		RNF19B					FBXL20
INPP5A		RNPC3					FBXL7
INPP5J		ROMO1					FBXO30
INTS5		RPL11					FBXO34
IPO13		RPL12					FBXO9
IRF2		RPL13A					FBXW2
ISCA1		RPL14					FBXW5
ITGAL		RPL18					FER1L6
ITPK1		RPL18A					FGF14
ITPR1		RPL21					FKBP1A
JAG2		RPL23					FNBP1
JUND		RPL23A					FOPNL
KANK2		RPL26					FRG1_1
KATNBL1		RPL27A					FRMD6
KCNC4		RPL28					FRYL
KCNK5		RPL29					FUBP3
KCNQ1		RPL30					FUCA1
KCNT1		RPL31					FUT8
KCTD17		RPL35					FYB2
KCTD2		RPL36					FYTTD1
KCTD7		RPL36AL					FZD3
KDM4B		RPL37					FZD4
KEG06_r01		RPL37A					FZD6
KHDC3L		RPL37A_1					GABPB1
KIAA0825		RPL38					GABRR3
KIAA0930		RPL4					GALNT11
KIAA1522		RPL41					GALNT18
KIAA1958		RPL9					GALNT3
KIAA2013		RPLP0					GAPVD1
KIF18B		RPLP1					GCHFR
KLC1		RPLP2					GDAP1
KLF16		RPN1					GDI1
KLF2		RPS10					GEMIN5
KLF5		RPS11					GFM1
KLHL9		RPS13					GIT2
KMT2B		RPS14					GLG1
KNSTRN		RPS15					GMCL1
KPNB1		RPS19					GNA12
KPTN		RPS19BP1					GNAI1
KSR1		RPS2					GNL2
LAMC1		RPS20					GOLGA1
LAMP1		RPS21					GOLGA4
LAPTM4B		RPS23					GOLGA5
LDB1		RPS27					GOSR1
LGALS12		RPS27L					GPALPP1
LHFPL6		RPS3					GPATCH1
LIG1		RPS5					GPBP1L1
LIMK1		RPS7					GPI
LIN28B		RPS8					GPR1
LMF2		RPS9					GRHL1
LMNB2		RTF1					GRHL3
LMTK2		RWDD1					GRN
LOC100424304		SART1					GRPEL2
LOC100425804		SCAMP1					GSTO1
LOC100427951		SCPEP1					GTF2E1
LOC106992281		SEC61A2					HACL1
LOC106992860		SEC61B					HASPIN
LOC106993384		SEC62					HAUS4
LOC106993609		SELENOH					HDAC1
LOC106994171		SELENOM					HDAC9
LOC106994346		SELENOW					HDDC3
LOC106994786		SERPINB7					HEATR1
LOC106994800		SH3BP1					HELZ
LOC106994839		SHD					HERC4
LOC106994856		SLC11A2					HHEX
LOC106994953		SLC30A9					HINT2
LOC106995127		SLC35A3					HM13
LOC106995159		SLC38A9					HMCES
LOC106995850		SLIRP					HMG20A
LOC106996680		SMDT1					HMGB2
LOC106998127		SMIM26					HMGN4
LOC106998527		SMIM4					HMMR
LOC106998611		SNRPC					HNRNPA1
LOC106999057		SNRPD3					HNRNPDL
LOC106999152		SNRPG					HNRNPR
LOC106999185		SOD1					HPRT1
LOC106999570		SON					HSD17B12
LOC106999697		SPATA33					HSDL2
LOC106999725		SPIDR					HSP90AB1
LOC107000048		SRSF9					HSPBAP1
LOC107000371		STX4					HTATSF1
LOC107000898		SWI5					HYI
LOC107001045		SYT3					HYLS1
LOC114669717		TAF10					IARS2
LOC114669774		TBC1D10B					ICAM1
LOC114669907		TEKT5					IDE
LOC114669965		TFAP2D					IDS
LOC114670049		TFF3					IER3IP1
LOC114670621		THAP4					IFNGR2
LOC114671351		TIMM13					IFT74
LOC114671705		TMED1					IL27RA
LOC114671902		TMEM203					ILF3
LOC114672254		TMEM208					INCA1
LOC114672381		TMEM256					INTS8
LOC114672432		TMEM258					INTS9
LOC114672518		TNIP2					IQGAP1
LOC114672628		TNNT1					IREB2
LOC114672701		TOMM7					IRF8
LOC114673092		TPT1					ITCH
LOC114673167		TRAPPC12					ITGAE
LOC114673356		TRIM44					ITPRIPL1
LOC114673476		TRIR					ITSN1
LOC114673571		TRNAU1AP					KALRN
LOC114673695		TSACC					KANK1
LOC114673717		TXNDC17					KANSL3
LOC114673798		UBA52					KBTBD6
LOC114673852		UBL5					KCTD13
LOC114674062		UBXN2A					KCTD5
LOC114674074		UQCC3					KCTD9
LOC114674370		UQCR					KDM3A
LOC114674414		UQCRQ					KDM4D
LOC114674418		WBP2NL					KIAA0586
LOC114674513		YBEY					KIAA1109
LOC114674885		YKT6					KIAA1147
LOC114675296		YME1L1					KIAA1841
LOC114675383		ZNF184					KIF11
LOC114675413		ZNF593					KIF15
LOC114675500							KIF23
LOC114675546							KIF26B
LOC114675599							KIF4A
LOC114675601							KIF5B
LOC114675676							KLHDC3
LOC114675787							KLHL23
LOC114675885							KLHL28
LOC114675997							KLHL3
LOC114677128							KLHL7
LOC114677482							KNL1
LOC114677682							KNTC1
LOC114677904							KPNA3
LOC114678406							KPNA7
LOC114678654							KRBA2
LOC114678708							L2HGDH
LOC114678871							LACC1
LOC114678968							LAPTM4A
LOC114679194							LARP1B
LOC114679203							LARP4B
LOC114679514							LGMN
LOC114679606							LHFPL3
LOC114679660							LIG3
LOC114680076							LIG4
LOC114680209							LIMA1
LOC114680366							LIN52
LOC114680375							LIN7B
LOC114680526							LIPA
LOC619515							LITAF
LOC693848							LMAN1
LOC694405							LNPK
LOC694937							LOC100424620
LOC695122							LOC100426633
LOC695715							LOC100427153
LOC696808							LOC100429933
LOC696998							LOC100430358
LOC698417							LOC106993227
LOC698582							LOC106994675
LOC698942							LOC106994875
LOC699344							LOC106995211
LOC699375							LOC106995487
LOC699443							LOC106995524
LOC699719							LOC106995551
LOC700257							LOC106995580
LOC700578							LOC106995720
LOC701369							LOC106995727
LOC701413							LOC106995902
LOC701661							LOC106995979
LOC701710							LOC106996136
LOC701909							LOC106996147
LOC701983							LOC106997519
LOC702297							LOC106997895
LOC702309							LOC106997951
LOC702723							LOC106999758
LOC702823							LOC106999860
LOC702875							LOC106999934
LOC703365							LOC106999955
LOC703641							LOC107000088
LOC704147							LOC107000413
LOC704705							LOC114669780
LOC705269							LOC114670385
LOC705327							LOC114670445
LOC705521							LOC114670983
LOC705933							LOC114671231
LOC706087							LOC114672113
LOC706480							LOC114672447
LOC706606							LOC114672655
LOC707468							LOC114672710
LOC707555							LOC114673042
LOC707834							LOC114673344
LOC708074							LOC114673699
LOC708375							LOC114674046
LOC708405							LOC114674224
LOC708492							LOC114674458
LOC708815							LOC114675331
LOC708899							LOC114675375
LOC710595							LOC114675448
LOC710642							LOC114675532
LOC710748							LOC114675556
LOC711062							LOC114675733
LOC711626							LOC114675827
LOC712203							LOC114675872
LOC712608							LOC114675903
LOC713003							LOC114676082
LOC713572							LOC114676417
LOC713984							LOC114676726
LOC714226							LOC114676806
LOC715154							LOC114676894
LOC715442							LOC114677139
LOC716221							LOC114677344
LOC716735							LOC114678109
LOC717763							LOC114678803
LOC717790							LOC693611
LOC717801							LOC693849
LOC718392							LOC695938
LOC719351							LOC696610
LOC719376							LOC696675
LOC720251							LOC697467
LOC720396							LOC697703
LOC720438							LOC697790
LOC722798							LOC698403
LOC722847							LOC699178
LPCAT1							LOC699621
LPIN2							LOC700087
LPXN							LOC700897
LRCH4							LOC701227
LRP3							LOC703156
LRRC23							LOC703977
LRRC4							LOC703985
LRRC47							LOC704575
LRRFIP1							LOC704758
LSM14B							LOC705507
LTBP4							LOC706575
MADD							LOC706716
MAFG							LOC707869
MAGI3							LOC707873
MAML1							LOC708683
MAP11							LOC709981
MAP1S							LOC712543
MAP2K2							LOC713553
MAP2K7							LOC714265
MAP3K11							LOC714892
MAP3K3							LOC714902
MAP6							LOC715487
MAPK12							LOC715948
MAPK7							LOC716188
MAPKAP1							LOC717340
MAPKAPK2							LOC718408
2025-03-02							LOC719082
2025-03-08							LOC719232
MARK4							LOC719341
MAST2							LOC719386
MAZ							LOC720207
MBD2							LOC720418
MCHR1							LOC723355
MDC1							LONP2
MDN1							LPIN1
MEAF6							LRIG2
MECP2							LRPPRC
MED10							LRRC41
MED15							LRRC42
MED25							LRRC8D
MEIS3							LSM14A
MELTF							LTN1
METTL21A							LYRM2
MFAP2							MAD2L1
MFHAS1							MAD2L2
MFSD12							MAGOH
MGAT4B							MAMDC2
MIDN							MAP1LC3B
MIIP							MAP2K1
MINAR1							MAP3K4
MINK1							MAP4
MKLN1							MAP4K5
MLLT6							MAPK6
MLXIP							MAPRE3
MMP24OS							2025-03-05
MNAT1							MBD1
MOB2							MBD4
MPP2							MBP
MRAS							MCM2
MRC2							MCOLN2
MRM2							MCTP1
MRPL17							MDM1
MRPL42							ME2
MSX1							MED12L
MT1X							MED14
MTCH1							MED20
MTDH							MED22
MTMR4							MED30
MTPN							MED6
MVP							MEST
MXD4							METTL17
MYBL2							MFSD1
MYEF2							MFSD14A
MYH11							MGA
MYNN							MID1
MYO16							MIEF1
MYO19							MIER2
MYO5B							MINPP1
MYOF							MIS18BP1
NAIF1							MKNK1
NANOS1							MLLT11
NAP1L4							MLX
NASP							MMD
NCLN							MMS22L
NCOA5							MMUT
NDRG1							MOB4
NDUFA4							MON2
NECAB3							MORC3
NEDD4L							MORN2
NEIL3							MOSPD2
NELFB							MOV10
NENF							MPP4
NET1							MRGBP
NFATC2							MRPL39
NFATC2IP							MRPL44
NFE2L1							MRPS15
NFKBIE							MRS2
NISCH							MRTFB
NKAPD1							MSI2
NKD1							MSL3
NLRP13							MSN
NLRP7							MTF1
NMRK2							MTF2
NOP56							MTPAP
NOP9							MXD1
NOS1AP							MYH7B
NPAS2							MYLK
NPRL3							MYO1B
NR1H3							MYO1C
NR6A1							MYO6
NRDE2							MYO9A
NUCB2							MYOCD
NUCKS1							N4BP2
NUSAP1							NAA15
OOEP							NAA20
OR2A25							NADK
ORMDL1							NAF1
ORMDL3							NAGPA
OSBPL5							NAMPT
OTULIN							NANP
PABPC1L							NAT2
PACS2							NAV2
PAIP2B							NAV3
PAK4							NBN
PAOX							NCAPG2
PAQR7							NCAPH
PARD3							NCBP1
PARP12							NECAP2
PARVB							NEK1
PBRM1							NEK5
PCBP1							NEK7
PCBP2							NELFCD
PCBP3							NFATC3
PCGF2							NFRKB
PCNX3							NFYA
PCP4L1							NHLRC3
PDRG1							NMT1
PFDN6							NOL8
PFKP							NOP2
PGGT1B							NPC1
PGM2							NPHP4
PGM5							NPL
PHC2							NPRL2
PHC3							NPTN
PHETA1							NR3C2
PHF10							NREP
PHF12							NSD2
PHF14							NSG2
PHF23							NSUN2
PHLDB1							NSUN4
PHLDB3							NT5DC1
PHOX2A							NUP107
PHRF1							NUP160
PI4K2A							NUP35
PICK1							NUP58
PIEZO1							NUP62
PIK3CB							NUP88
PIN4							NUP98
PINK1							NXN
PIP4P1							OLFM4
PIP5K1C							OPA1
PITX1							OSBPL8
PKMYT1							OSTM1
PLEKHG3							PA2G4
PLEKHH3							PACSIN2
PLEKHO1							PAK2
PMM1							PALB2
PNMA8A							PAPOLA
PNPLA2							PAPSS1
PNRC2							PARN
POLG2							PARP1
POLK							PARP16
POLL							PARS2
POLR1D							PATL1
POLR1E							PAXIP1
POLR2K							PCF11
POLR2L							PCGF3
POU2F1							PCGF6
PPFIA1							PCIF1
PPFIA3							PCM1
PPIB							PCMTD1
PPID							PCNX4
PPIH							PCP4
PPP1R10							PCSK7
PPP1R13B							PDCD6
PPP1R3D							PDGFRL
PPP2R1A							PDHX
PPP2R1B							PDIA3
PPP2R2C							PDIA5
PPP2R5A							PDZD2
PPP6R1							PECAM1
PPY							PECR
PRDM4							PEF1
PRDX1							PELO
PRKAR1A							PFN2
PRKCZ							PGAP2
PROCR							PGM2L1
PRPF31							PHF20
PRR14							PHF21A
PRR36							PHF7
PRR5							PHKB
PRSS57							PHYHIPL
PSMB3							PIAS3
PSMD11							PIGA
PTBP1							PIGM
PTGES2							PIK3C2B
PTH1R							PIK3R4
PTOV1							PITHD1
PTP4A2							PLAG1
PTPN11							PLAUR
PWWP3A							PLCH1
PXN							PLPP6
QSOX1							PNISR
RAB11FIP4							PNPLA8
RAB15							POC1B
RABL6							POLD3
RAD23B							POLE3
RAD54L							POLR2C
RAP2B							POLR3A
RAPGEF1							POLR3B
RAPH1							POLR3E
RBM10							POLR3G
RBM38							POP5
RBPMS2							PPIL2
RCAN1							PPIL4
RCC1L							PPIP5K2
RDH10							PPM1D
RECQL5							PPP1R12A
RELA							PPP1R2C
RELT							PPP2R5D
RETREG2							PPP4R1
REXO1							PPP4R3B
REXO4							PPP6C
RGS14							PPT2
RHNO1							PRCD
RIMS3							PREX1
RIN1							PRKDC
RNASEK							PRMT6
RNF145							PROSER1
RNF220							PRPF3
RNF25							PRPF40A
RNF31							PRR14L
RNF4							PRRC1
RNF40							PRRG1
ROCK1							PRSS16
RP9							PSD3
RPH3AL							PSIP1
RPL17							PSKH1
RPL19							PSMA2
RPL24							PSMA8
RPL32							PSMB7
RPL35A							PTGES3
RPL5							PTPMT1
RPL7A							PTPN1
RPS12							PTPN13
RPS17							PTPN2
RPS18							PTPN5
RPS24							PTTG1
RPS27A							PTTG1IP
RPS27A_1							PUS7L
RPS28							PXDN
RPS29							PXYLP1
RPSA							R3HDM1
RRM2							RAB10
RTEL1							RAB20
RTN2							RAB3GAP1
RUFY3							RAB3GAP2
RXRB							RABGAP1
SALL2							RABGGTB
SAMD1							RAP2C
SAP30							RAPGEF6
SAP30L							RBBP4
SBF1							RBL2
SCAP							RBM15
SCGB1D1							RBM25
SDHD							RBM27
SDHD_1							RBPJ
SDR42E2							RCAN3
SEC61G							RCOR3
SEC63							RDH12
SELENON							RDX
SENP2							RESF1
SERAC1							RFFL
SERINC5							RFWD3
SERP2							RFXANK
SERTAD1							RHOBTB3
SERTAD2							RIOK1
SETD1B							RIOK3
SF3B6							RIOX2
SGCZ							RIPOR1
SH2B1							RLF
SH3BP2							RLIM
SH3BP5L							RMC1
SH3GL1							RNF10
SH3GLB2							RNF114
SHROOM2							RNF138
SIN3B							RNF141
SIRT6							RNF168
SLC13A3							RNF17
SLC15A4							RNF2
SLC1A6							RNF20
SLC25A10							RNF24
SLC25A29							RNF34
SLC27A4							RNFT1
SLC27A5							RNGTT
SLC2A4RG							RNPS1
SLC35C2							RP1
SLC35D2							RPA1
SLC49A4							RPGR
SLC4A11							RPGRIP1L
SLC4A2							RPL39L
SLC52A2							RPP14
SLC7A5							RPRD1A
SLC9A1							RPS6KA5
SMARCA4							RPS6KB1
SMARCC1							RRAS2
SMARCD2							RRM1
SMG5							RRNAD1
SMG6							RSPH9
SMG9							RTKN2
SMNDC1							RTRAF
SMPD1							RTTN
SNAP91							RUVBL1
SNAPC4							RWDD4
SNCB							SAE1
SNRNP35							SAMD4B
SNRNP70							SAP130
SNRPD1							SASS6
SNRPE							SAV1
SNRPF							SBDS
SNX12							SC5D
SNX2							SCAF4
SNX3							SCAI
SORT1							SCAPER
SPDYA							SCOC
SPPL3							SCYL2
SPRY4							SCYL3
SREBF2							SDAD1
SREK1IP1							SEC14L1
SRF							SEC61A1
SRRM2							SECISBP2
SSBP2							SECISBP2L
SSR2							SELENOI
SSRP1							SEMA5A
ST14							SEPHS2
ST3GAL4							SEPTIN10
ST5							SEPTIN2
STAG3							SERBP1
STARD10							SERINC1
STARD13							SERPINE2
STARD9							SETX
STIM2							SF3B1
STIMATE							SF3B2
STK11							SFMBT1
STK32C							SFSWAP
STK39							SH2D4B
STK40							SH3GL2
STX16							SHC1
SUPT4H1							SHCBP1
SUPT6H							SIDT2
SYNM							SIGMAR1
TADA2B							SKAP2
TAF12							SKP2
TAF4							SLC16A14
TAOK2							SLC19A2
TASP1							SLC1A5
TBC1D1							SLC25A12
TCEAL2							SLC25A26
TCF15							SLC25A31
TCIRG1							SLC25A32
TDP1							SLC25A38
TEAD4							SLC25A40
TENT5B							SLC25A46
TERB2							SLC30A7
TERF2							SLC31A1
TESC							SLC33A1
TESK1							SLC35A1
TEX12							SLC35A2
TFE3							SLC35A4
THOP1							SLC38A7
TIAF1							SLC43A1
TIAL1							SLC44A3
TIMM10							SLC4A1AP
TMEM120B							SLC5A11
TMEM127							SLC7A1
TMEM131							SLC7A8
TMEM14A							SLF2
TMEM14B							SLU7
TMEM159							SMAD1
TMEM185A							SMAD2
TMEM186							SMAP1
TMEM198							SMARCA5
TMEM199							SMARCAD1
TMEM201							SMARCAL1
TMEM214							SMC3
TMEM259							SMC4
TMEM50A							SMC5
TMEM51							SMC6
TMEM63A							SMG1
TMEM8A							SMG8
TMEM8B							SMIM1
TNFRSF1B							SMIM15
TNFSF12							SMIM7
TNNC1							SMIM8
TNS1							SNAPC1
TOM1L2							SNF8
TOMM40							SNRNP25
TOMM70							SNU13
TOP1							SNX24
TPRG1L_1							SOHLH2
TPRN							SORBS1
TRAF2							SORCS3
TRAF3							SORL1
TRAPPC6A							SOX30
TRIM11							SP2
TRIM28							SPATA2
TRIM8							SPATA22
TRIO							SPATA6
TRIOBP							SPICE1
TRMT2B							SPIN3
TRPC4AP							SPINT2
TRPM2							SPOP
TRPV6							SPRTN
TSG101							SRFBP1
TSPAN18							SRSF10
TSPAN4							SRSF11
TSPAN9							SRSF4
TUBA1A							SRSF6
TUBA1B							SSU72
TUBA4A							STAG1
TXNL4A							STARD3NL
TYW5							STAU1
UBALD1							STIL
UBALD2							STK24
UBC							STK3
UBE2E1							STK31
UBE2G1							STK35
UBE2O							STK38
UBE2S							STK4
UBE2Z							STRADB
UBE3A							STRAP
UBL4B							STX12
UBN1							STX17
UBTD1							STX3
UBTF							STX7
ULK2							STXBP1
UNC13D							STXBP4
UNKL							SUMO2
UPF1							SUN1
UPF2							SUPT16H
UQCRH							SUPT20H
URGCP							SUPV3L1
USF2							SWAP70
USP20							SYCE1
UTP14C							SYNE2
VGLL4							SYNJ1
VPS26B							SYT11
VPS37B							SYTL2
VRTN							TADA2A
VSTM2L							TAF1B
WASL							TAF3
WDCP							TAF4B
WDR38							TAF6
WDR60							TALDO1
WFDC2							TAMM41
WIPI2							TANC1
WIZ							TAOK3
WRNIP1							TASOR
XPO6							TAT
XPO7							TBC1D14
XRCC1							TBC1D31
YAE1							TCAF1
YAF2							TCAIM
YBX2							TCEANC
YPEL1							TENT2
YPEL3							TERB1
YTHDF1							TFB2M
ZAR1							TFCP2
ZBTB45							TGIF2LX
ZBTB5							THBS4
ZCCHC3							THOC3
ZDHHC18							THRAP3
ZDHHC8							THUMPD1
ZFAND2A							TIAM1
ZFAND3							TIFA
ZFP91							TINF2
ZFYVE21							TJAP1
ZG16							TLCD1
ZKSCAN2							TM2D2
ZMAT2							TM9SF1
ZMIZ2							TM9SF2
ZMYND19							TMCC1
ZNF24							TMCO1
ZNF248							TMEM109
ZNF251							TMEM128
ZNF275							TMEM131L
ZNF277							TMEM135
ZNF318							TMEM150A
ZNF335							TMEM184C
ZNF398							TMEM209
ZNF426							TMEM30A
ZNF541							TMEM38B
ZNF548							TMEM54
ZNF579							TMEM56
ZNF598							TMEM69
ZNF672							TMEM70
ZNF689							TMF1
ZNF740							TMX1
ZNF830							TNFAIP1
ZNRF1							TNPO3
ZSWIM4							TNRC6B
ZSWIM8							TOGARAM1
							TOMM22
							TOP2B
							TOPORS
							TOR1AIP2_1
							TOX4
							TPM3
							TPP2
							TPR
							TPX2
							TRAF6
							TRAFD1
							TRAM2
							TRAPPC2L
							TRIM36
							TRIM37
							TRIM6
							TRIP13
							TRIT1
							TRMT13
							TRMT5
							TRMT61B
							TROAP
							TSEN15
							TSNAX
							TSPAN3
							TSPYL4
							TSTD2
							TTC14
							TTC3
							TTC5
							TTF2
							TTLL5
							TUBGCP3
							TUBGCP4
							TULP3
							TUSC2
							TUT7
							TXLNG
							TXNDC11
							TYK2
							UBAP2L
							UBE2G2
							UBE2I
							UBE2Q1
							UBE2Q2
							UBE3B
							UBLCP1
							UBR1
							UBR2
							UBXN4
							UBXN7
							UCHL5
							UCKL1
							UFL1
							UGGT2
							UHMK1
							UHRF1BP1
							UHRF1BP1L
							UNC5A
							UNG
							UPP2
							UQCRC1
							USB1
							USP1
							USP10
							USP15
							USP21
							USP36
							USP39
							USP47
							USP54
							UTP14A
							UTP23
							UXT
							VAMP4
							VAPB
							VIRMA
							VMA21
							VPS4B
							VSTM1
							VWA3A
							WASF1
							WASF2
							WASHC4
							WDR11
							WDR19
							WDR20
							WDR37
							WDR45B
							WDR47
							WDR70
							WDR89
							WDYHV1
							WEE2
							WTAP
							WTIP
							XKR8
							XPC
							YIPF5
							YIPF6
							YTHDF3
							YWHAB
							YWHAQ
							YY1AP1
							YY2
							ZBTB2
							ZBTB26
							ZBTB33
							ZBTB39
							ZBTB49
							ZC2HC1A
							ZC3H7A
							ZCCHC7
							ZCCHC8
							ZDHHC3
							ZFAND5
							ZFP1
							ZFR
							ZHX1
							ZMYND8
							ZNF10
							ZNF101
							ZNF106
							ZNF132
							ZNF143
							ZNF146
							ZNF148
							ZNF160
							ZNF181
							ZNF202
							ZNF215
							ZNF256
							ZNF26
							ZNF280B
							ZNF280C
							ZNF285
							ZNF343
							ZNF346
							ZNF418
							ZNF441
							ZNF449
							ZNF45
							ZNF461
							ZNF510
							ZNF518A
							ZNF549
							ZNF552
							ZNF574
							ZNF592
							ZNF595
							ZNF599
							ZNF638
							ZNF664
							ZNF667
							ZNF674
							ZNF682
							ZNF76
							ZNF770
							ZNF773
							ZNF805
							ZNF84
							ZNHIT3
							ZPBP2
							ZSCAN22
							ZSCAN25
							ZYG11A
							ZZZ3

## Sheet: GO enrichment of module 1
GO enrichment of module 1 genes
Category	Term	Count	%	Pvalue	Genes
GOTERM_BP_DIRECT	GO:0010508~positive regulation of autophagy	12	1.16505	0.000182457	TRIM8, DUSP12, BECN1, STK11, CCNY, USP20, ROCK1, ATG101, NPRL3, ULK2, FOXO3, MTDH
GOTERM_BP_DIRECT	GO:0045944~positive regulation of transcription by RNA polymerase II	53	5.14563	0.000796864	LDB1, CRTC1, LOC719351, NUCKS1, UBE3A, WASL, MECP2, IL4I1, MED10, ZMIZ2, NFATC2IP, MYBL2, IER5, SMARCC1, TFE3, PTOV1, RNF40, SREBF2, MED25, IRF2, ENG, AKNA, SRF, RNF4, RELA, MLLT6, SLC9A1, GLIS2, RXRB, MAPK7, SERTAD1, DDRGK1, PCBP1, DVL1, E2F1, DVL3, JUND, POU2F1, DAB2IP, AP3D1, NFATC2, NR1H3, MEIS3, USF2, KLF2, SMARCA4, ASXL1, PINK1, CAMK1, ZNF335, SSBP2, LPIN2, FOXA3
GOTERM_BP_DIRECT	GO:0000184~nuclear-transcribed mRNA catabolic process, nonsense-mediated decay	7	0.679612	0.000863123	UPF2, UPF1, DHX34, SMG9, SMG5, SMG6, PNRC2
GOTERM_BP_DIRECT	GO:0008285~negative regulation of cell population proliferation	21	2.03883	0.00193405	MINAR1, DDR1, KANK2, CDKN2D, BECN1, TSG101, TESC, PTH1R, TENT5B, NDRG1, FGFRL1, CHERP, DNAJB2, TIAL1, LOC114675413, TMEM127, ATG101, CSK, MSX1, ATF5, COPS8
GOTERM_BP_DIRECT	GO:0001701~in utero embryonic development	19	1.84466	0.00222469	JAG2, ELL, PCGF2, AXIN1, SMG9, PTH1R, TERF2, KLF2, CAMSAP3, ADCY9, POLG2, RDH10, MAFG, ERCC2, CCM2, MSX1, ZNF335, BAP1, FGFR1
GOTERM_BP_DIRECT	GO:0043254~regulation of protein-containing complex assembly	5	0.485437	0.00283154	PINK1, NCLN, BBS10, PTPN11, TRAF2
GOTERM_BP_DIRECT	GO:0032007~negative regulation of TOR signaling	6	0.582524	0.005439	MINAR1, GSK3A, LOC114675413, TMEM127, NPRL3, AKT1S1
GOTERM_BP_DIRECT	GO:1905515~non-motile cilium assembly	9	0.873786	0.00637672	IFT88, KLF5, BBS10, DCTN1, KCNQ1, IFT172, CSNK1D, DISC1, HIGD1A
GOTERM_BP_DIRECT	GO:0006325~chromatin organization	15	1.45631	0.00654426	MEAF6, KMT2B, SUPT4H1, XPO7, NUCKS1, RELA, RNF40, MLLT6, ING2, TRIM28, UBN1, PWWP3A, SAMD1, BAP1, BRD4
GOTERM_BP_DIRECT	GO:0006281~DNA repair	17	1.65049	0.00663237	UPF1, MDC1, RTEL1, LIG1, WRNIP1, SSRP1, REXO4, RECQL5, CHAF1A, TRIM28, TDP1, ERCC2, PWWP3A, POLL, POLK, MNAT1, ATRIP
GOTERM_BP_DIRECT	GO:0010613~positive regulation of cardiac muscle hypertrophy	4	0.38835	0.00857771	MTPN, BECN1, ROCK1, SLC9A1
GOTERM_BP_DIRECT	GO:0007017~microtubule-based process	6	0.582524	0.00878784	TUBA1B, TUBA1A, DYNLL1, DYNLL2, MAP3K11, TUBA4A
GOTERM_BP_DIRECT	GO:0006468~protein phosphorylation	31	3.00971	0.00884816	DDR1, GSK3A, TRIO, STK39, TESK1, PKMYT1, PRKCZ, STK11, EEF2K, MAPK7, CSK, MARK4, MAP2K7, STK32C, LOC106995850, PAK4, MAP3K3, MAP2K2, KSR1, MINK1, LIMK1, LMTK2, MAPK12, BCR, GAK, PINK1, TAOK2, GAS6, MAP3K11, STK40, FGFR1
GOTERM_BP_DIRECT	GO:0032456~endocytic recycling	8	0.776699	0.00922411	SNX3, ARL4C, EHD1, STX16, DENND1A, SNX12, LMTK2, RAB11FIP4
GOTERM_BP_DIRECT	GO:0001558~regulation of cell growth	6	0.582524	0.0101635	DDR1, NANOS1, STK11, TSG101, MEAF6, BAP1
GOTERM_BP_DIRECT	GO:0070534~protein K63-linked ubiquitination	8	0.776699	0.0123662	TRIM8, TRAF3, UBE2S, ZFP91, UBE2O, UBE2G1, LOC705933, TRAF2
GOTERM_BP_DIRECT	GO:0006412~translation	26	2.52427	0.0125639	RPL5, RPL32, MRPL17, EIF4ENIF1, RPS17, RPS18, LOC706087, LOC706606, LOC702723, RPS27A, RPL17, RPS12, RPL19, LOC708074, RPL35A, LOC699375, RPSA, LOC114673092, ZAR1, RPS28, RPS29, SLC25A10, EEF1E1, LOC703365, RPS24
GOTERM_BP_DIRECT	GO:0045724~positive regulation of cilium assembly	5	0.485437	0.0131856	IFT88, HTT, MARK4, KCTD17, ARHGAP35
GOTERM_BP_DIRECT	GO:0030308~negative regulation of cell growth	10	0.970874	0.0140294	DNAJB2, MINAR1, CDKN2D, STK11, SERTAD1, SERTAD2, EI24, NAIF1, MSX1, SMARCA4
GOTERM_BP_DIRECT	GO:0050727~regulation of inflammatory response	9	0.873786	0.0141228	LOC114675599, NLRP13, AKNA, NLRP7, STK39, GGT1, DAGLB, RELA, BAP1
GOTERM_BP_DIRECT	GO:1902902~negative regulation of autophagosome assembly	4	0.38835	0.0147042	BECN1, PINK1, PHF23, EHMT2
GOTERM_BP_DIRECT	GO:0006886~intracellular protein transport	20	1.94175	0.0156245	ARF3, LOC114669717, RPH3AL, ENDOG, STX16, AP1B1, CLTB, AP3D1, XPO7, VPS26B, AP2A2, ARL4C, EHD1, GGA1, TUBA1B, SNX2, TUBA1A, SEC61G, PICK1, AP3S1
GOTERM_BP_DIRECT	GO:0070301~cellular response to hydrogen peroxide	6	0.582524	0.0171309	NET1, TRPM2, MAPK7, PCGF2, RELA, ZNF277
GOTERM_BP_DIRECT	GO:0006357~regulation of transcription by RNA polymerase II	86	8.34951	0.0172817	CSRNP2, GSK3A, ZNF251, PRDM4, LOC722847, ELK1, CHD1, DUSP12, SALL2, MED10, ZMIZ2, ZNF689, ZNF248, LRRFIP1, DUXB, PITX1, VRTN, TEAD4, HES6, BRD1, TCF15, TFE3, ZFP91, FOXP4, KLF16, ETV5, HIC2, LOC106994856, IRF2, ERF, ATF5, CCNQ, HDGFL3, ZNF398, ATF4, ZNF672, ZNF275, SMARCD2, MAZ, MYNN, WIZ, FOXK2, LOC114674074, LOC106994839, ZBTB5, FOXO3, ZNF24, RELA, NPAS2, MLLT6, MTDH, GLIS2, BRIP1, GBX2, PCBP3,…
GOTERM_BP_DIRECT	GO:0090063~positive regulation of microtubule nucleation	3	0.291262	0.0184512	MECP2, DCTN1, GIT1
GOTERM_BP_DIRECT	GO:0017148~negative regulation of translation	8	0.776699	0.0192073	NANOS1, GRB7, EIF4ENIF1, PAIP2B, FXR2, CAPRIN2, CALR, ZAR1
GOTERM_BP_DIRECT	GO:0000398~mRNA splicing, via spliceosome	14	1.35922	0.0207537	SRRM2, DDX46, SF3B6, LOC719351, DAW1, ZMAT2, SNRNP70, DHX38, SNRPE, PRPF31, SNRPF, TXNL4A, SNRNP35, RBM10
GOTERM_BP_DIRECT	GO:0061157~mRNA destabilization	4	0.38835	0.0227561	NANOS1, YTHDF1, ALKBH5, ROCK1
GOTERM_BP_DIRECT	GO:0070886~positive regulation of calcineurin-NFAT signaling cascade	4	0.38835	0.0227561	PTBP1, SPPL3, SLC9A1, CHERP
GOTERM_BP_DIRECT	GO:0000122~negative regulation of transcription by RNA polymerase II	46	4.46602	0.0238003	KANK2, TSG101, LDB1, EHMT2, MAZ, CHD4, LOC114674074, ZBTB45, LOC106994839, MTDH, GLIS2, MECP2, SALL2, PCBP3, SIN3B, TRIM28, E2F1, DNMT3B, LOC720251, ZNF548, ZNF248, SAMD1, RBM10, JUND, LOC720438, PHF12, PCGF2, MBD2, DNMT3A, DAB2IP, NR1H3, SIRT6, KLF2, ETV5, SAP30, GATAD2A, FAM220A, HIC2, EID2, MED25, NR6A1, BCL6B, PHF14, CALR, FGFR1, ATF4
GOTERM_BP_DIRECT	GO:0032956~regulation of actin cytoskeleton organization	8	0.776699	0.0243908	ARHGAP44, TRPM2, ROCK1, CAPN10, ARHGEF16, TAOK2, ARAP3, ARAP1
GOTERM_BP_DIRECT	GO:0045599~negative regulation of fat cell differentiation	6	0.582524	0.0266977	ASXL1, TRIO, SORT1, E2F1, AXIN1, LRP3
GOTERM_BP_DIRECT	GO:0002181~cytoplasmic translation	9	0.873786	0.0271499	LOC114677128, RPS29, LOC708074, RPL35A, RPL24, RPSA, LOC702723, RPL17, RPL19
GOTERM_BP_DIRECT	GO:0030036~actin cytoskeleton organization	14	1.35922	0.0274239	STARD13, ROCK1, MINK1, LIMK1, TESK1, WASL, PARVB, BCR, NISCH, MKLN1, DIAPH1, TAOK2, FLNA, FLNB
GOTERM_BP_DIRECT	GO:0034244~negative regulation of transcription elongation by RNA polymerase II	4	0.38835	0.0275139	RECQL5, AXIN1, SUPT4H1, NELFB
GOTERM_BP_DIRECT	GO:0006338~chromatin remodeling	14	1.35922	0.0286725	PBRM1, SMARCC1, INO80E, KDM4B, PCGF2, C4H6ORF89, CHD4, BAZ1B, CHD1, SMARCA4, TADA2B, TOP1, HDGFL3, BRD4
GOTERM_BP_DIRECT	GO:0006260~DNA replication	9	0.873786	0.0289848	RTEL1, RECQL5, CHAF1A, POLG2, LIG1, POLL, SSRP1, TOP1, CHTF18
GOTERM_BP_DIRECT	GO:0048675~axon extension	5	0.485437	0.0312854	SRF, DVL1, LIMK1, RAPH1, ULK2
GOTERM_BP_DIRECT	GO:0006289~nucleotide-excision repair	6	0.582524	0.032541	BRIP1, ERCC2, POLL, CAMK1, MNAT1, RAD23B
GOTERM_BP_DIRECT	GO:0006337~nucleosome disassembly	4	0.38835	0.0327574	SMARCC1, SMARCD2, SSRP1, SMARCA4
GOTERM_BP_DIRECT	GO:0006364~rRNA processing	10	0.970874	0.0360443	FBL, RPL5, RPL35A, DDX54, PIN4, LOC710642, REXO4, MDN1, MRM2, UTP14C
GOTERM_BP_DIRECT	GO:1901381~positive regulation of potassium ion transmembrane transport	3	0.291262	0.0364943	KCNQ1, AMIGO1, FLNA
GOTERM_BP_DIRECT	GO:0140058~neuron projection arborization	3	0.291262	0.0364943	TUBA1B, TUBA1A, ROCK1
GOTERM_BP_DIRECT	GO:0090521~podocyte cell migration	3	0.291262	0.0364943	KANK2, ROCK1, TESK1
GOTERM_BP_DIRECT	GO:0043583~ear development	3	0.291262	0.0364943	DDR1, TCF15, RDH10
GOTERM_BP_DIRECT	GO:0006623~protein targeting to vacuole	4	0.38835	0.0384812	GID4, TMEM50A, AP3D1, VPS37B
GOTERM_BP_DIRECT	GO:0046330~positive regulation of JNK cascade	9	0.873786	0.0418025	MFHAS1, TRAF3, MINK1, TAOK2, DAB2IP, AXIN1, DVL3, TRAF2, MAP3K11
GOTERM_BP_DIRECT	GO:0048477~oogenesis	5	0.485437	0.0439839	NANOS1, TERB2, PAQR7, SPDYA, ZAR1
GOTERM_BP_DIRECT	GO:0030041~actin filament polymerization	5	0.485437	0.0439839	DIAPH1, GSN, ARPC2, COBL, WASL
GOTERM_BP_DIRECT	GO:1900026~positive regulation of substrate adhesion-dependent cell spreading	5	0.485437	0.0439839	TESK1, FLNA, CALR, TRIOBP, UNC13D
GOTERM_BP_DIRECT	GO:0045039~protein insertion into mitochondrial inner membrane	3	0.291262	0.0472316	TOMM70, AGK, TIMM10
GOTERM_BP_DIRECT	GO:0051451~myoblast migration	3	0.291262	0.0472316	NET1, ROCK1, PLEKHO1
GOTERM_BP_DIRECT	GO:0008654~phospholipid biosynthetic process	5	0.485437	0.0487698	GPAT4, LPCAT1, SERAC1, AGPAT1, SERINC5
GOTERM_BP_DIRECT	GO:0010508~positive regulation of autophagy	12	1.16505	0.000182457	TRIM8, DUSP12, BECN1, STK11, CCNY, USP20, ROCK1, ATG101, NPRL3, ULK2, FOXO3, MTDH
GOTERM_BP_DIRECT	GO:0045944~positive regulation of transcription by RNA polymerase II	53	5.14563	0.000796864	LDB1, CRTC1, LOC719351, NUCKS1, UBE3A, WASL, MECP2, IL4I1, MED10, ZMIZ2, NFATC2IP, MYBL2, IER5, SMARCC1, TFE3, PTOV1, RNF40, SREBF2, MED25, IRF2, ENG, AKNA, SRF, RNF4, RELA, MLLT6, SLC9A1, GLIS2, RXRB, MAPK7, SERTAD1, DDRGK1, PCBP1, DVL1, E2F1, DVL3, JUND, POU2F1, DAB2IP, AP3D1, NFATC2, NR1H3, MEIS3, USF2, KLF2, SMARCA4, ASXL1, PINK1, CAMK1, ZNF335, SSBP2, LPIN2, FOXA3
GOTERM_BP_DIRECT	GO:0000184~nuclear-transcribed mRNA catabolic process, nonsense-mediated decay	7	0.679612	0.000863123	UPF2, UPF1, DHX34, SMG9, SMG5, SMG6, PNRC2
GOTERM_BP_DIRECT	GO:0008285~negative regulation of cell population proliferation	21	2.03883	0.00193405	MINAR1, DDR1, KANK2, CDKN2D, BECN1, TSG101, TESC, PTH1R, TENT5B, NDRG1, FGFRL1, CHERP, DNAJB2, TIAL1, LOC114675413, TMEM127, ATG101, CSK, MSX1, ATF5, COPS8
GOTERM_BP_DIRECT	GO:0001701~in utero embryonic development	19	1.84466	0.00222469	JAG2, ELL, PCGF2, AXIN1, SMG9, PTH1R, TERF2, KLF2, CAMSAP3, ADCY9, POLG2, RDH10, MAFG, ERCC2, CCM2, MSX1, ZNF335, BAP1, FGFR1
GOTERM_BP_DIRECT	GO:0043254~regulation of protein-containing complex assembly	5	0.485437	0.00283154	PINK1, NCLN, BBS10, PTPN11, TRAF2
GOTERM_BP_DIRECT	GO:0032007~negative regulation of TOR signaling	6	0.582524	0.005439	MINAR1, GSK3A, LOC114675413, TMEM127, NPRL3, AKT1S1
GOTERM_BP_DIRECT	GO:1905515~non-motile cilium assembly	9	0.873786	0.00637672	IFT88, KLF5, BBS10, DCTN1, KCNQ1, IFT172, CSNK1D, DISC1, HIGD1A
GOTERM_BP_DIRECT	GO:0006325~chromatin organization	15	1.45631	0.00654426	MEAF6, KMT2B, SUPT4H1, XPO7, NUCKS1, RELA, RNF40, MLLT6, ING2, TRIM28, UBN1, PWWP3A, SAMD1, BAP1, BRD4
GOTERM_BP_DIRECT	GO:0006281~DNA repair	17	1.65049	0.00663237	UPF1, MDC1, RTEL1, LIG1, WRNIP1, SSRP1, REXO4, RECQL5, CHAF1A, TRIM28, TDP1, ERCC2, PWWP3A, POLL, POLK, MNAT1, ATRIP
GOTERM_BP_DIRECT	GO:0010613~positive regulation of cardiac muscle hypertrophy	4	0.38835	0.00857771	MTPN, BECN1, ROCK1, SLC9A1
GOTERM_BP_DIRECT	GO:0007017~microtubule-based process	6	0.582524	0.00878784	TUBA1B, TUBA1A, DYNLL1, DYNLL2, MAP3K11, TUBA4A
GOTERM_BP_DIRECT	GO:0006468~protein phosphorylation	31	3.00971	0.00884816	DDR1, GSK3A, TRIO, STK39, TESK1, PKMYT1, PRKCZ, STK11, EEF2K, MAPK7, CSK, MARK4, MAP2K7, STK32C, LOC106995850, PAK4, MAP3K3, MAP2K2, KSR1, MINK1, LIMK1, LMTK2, MAPK12, BCR, GAK, PINK1, TAOK2, GAS6, MAP3K11, STK40, FGFR1
GOTERM_BP_DIRECT	GO:0032456~endocytic recycling	8	0.776699	0.00922411	SNX3, ARL4C, EHD1, STX16, DENND1A, SNX12, LMTK2, RAB11FIP4
GOTERM_BP_DIRECT	GO:0001558~regulation of cell growth	6	0.582524	0.0101635	DDR1, NANOS1, STK11, TSG101, MEAF6, BAP1
GOTERM_BP_DIRECT	GO:0070534~protein K63-linked ubiquitination	8	0.776699	0.0123662	TRIM8, TRAF3, UBE2S, ZFP91, UBE2O, UBE2G1, LOC705933, TRAF2
GOTERM_BP_DIRECT	GO:0006412~translation	26	2.52427	0.0125639	RPL5, RPL32, MRPL17, EIF4ENIF1, RPS17, RPS18, LOC706087, LOC706606, LOC702723, RPS27A, RPL17, RPS12, RPL19, LOC708074, RPL35A, LOC699375, RPSA, LOC114673092, ZAR1, RPS28, RPS29, SLC25A10, EEF1E1, LOC703365, RPS24
GOTERM_BP_DIRECT	GO:0045724~positive regulation of cilium assembly	5	0.485437	0.0131856	IFT88, HTT, MARK4, KCTD17, ARHGAP35
GOTERM_BP_DIRECT	GO:0030308~negative regulation of cell growth	10	0.970874	0.0140294	DNAJB2, MINAR1, CDKN2D, STK11, SERTAD1, SERTAD2, EI24, NAIF1, MSX1, SMARCA4
GOTERM_BP_DIRECT	GO:0050727~regulation of inflammatory response	9	0.873786	0.0141228	LOC114675599, NLRP13, AKNA, NLRP7, STK39, GGT1, DAGLB, RELA, BAP1
GOTERM_BP_DIRECT	GO:1902902~negative regulation of autophagosome assembly	4	0.38835	0.0147042	BECN1, PINK1, PHF23, EHMT2
GOTERM_BP_DIRECT	GO:0006886~intracellular protein transport	20	1.94175	0.0156245	ARF3, LOC114669717, RPH3AL, ENDOG, STX16, AP1B1, CLTB, AP3D1, XPO7, VPS26B, AP2A2, ARL4C, EHD1, GGA1, TUBA1B, SNX2, TUBA1A, SEC61G, PICK1, AP3S1
GOTERM_BP_DIRECT	GO:0070301~cellular response to hydrogen peroxide	6	0.582524	0.0171309	NET1, TRPM2, MAPK7, PCGF2, RELA, ZNF277
GOTERM_BP_DIRECT	GO:0006357~regulation of transcription by RNA polymerase II	86	8.34951	0.0172817	CSRNP2, GSK3A, ZNF251, PRDM4, LOC722847, ELK1, CHD1, DUSP12, SALL2, MED10, ZMIZ2, ZNF689, ZNF248, LRRFIP1, DUXB, PITX1, VRTN, TEAD4, HES6, BRD1, TCF15, TFE3, ZFP91, FOXP4, KLF16, ETV5, HIC2, LOC106994856, IRF2, ERF, ATF5, CCNQ, HDGFL3, ZNF398, ATF4, ZNF672, ZNF275, SMARCD2, MAZ, MYNN, WIZ, FOXK2, LOC114674074, LOC106994839, ZBTB5, FOXO3, ZNF24, RELA, NPAS2, MLLT6, MTDH, GLIS2, BRIP1, GBX2, PCBP3,…
GOTERM_BP_DIRECT	GO:0090063~positive regulation of microtubule nucleation	3	0.291262	0.0184512	MECP2, DCTN1, GIT1
GOTERM_BP_DIRECT	GO:0017148~negative regulation of translation	8	0.776699	0.0192073	NANOS1, GRB7, EIF4ENIF1, PAIP2B, FXR2, CAPRIN2, CALR, ZAR1
GOTERM_BP_DIRECT	GO:0000398~mRNA splicing, via spliceosome	14	1.35922	0.0207537	SRRM2, DDX46, SF3B6, LOC719351, DAW1, ZMAT2, SNRNP70, DHX38, SNRPE, PRPF31, SNRPF, TXNL4A, SNRNP35, RBM10
GOTERM_BP_DIRECT	GO:0061157~mRNA destabilization	4	0.38835	0.0227561	NANOS1, YTHDF1, ALKBH5, ROCK1
GOTERM_BP_DIRECT	GO:0070886~positive regulation of calcineurin-NFAT signaling cascade	4	0.38835	0.0227561	PTBP1, SPPL3, SLC9A1, CHERP
GOTERM_BP_DIRECT	GO:0000122~negative regulation of transcription by RNA polymerase II	46	4.46602	0.0238003	KANK2, TSG101, LDB1, EHMT2, MAZ, CHD4, LOC114674074, ZBTB45, LOC106994839, MTDH, GLIS2, MECP2, SALL2, PCBP3, SIN3B, TRIM28, E2F1, DNMT3B, LOC720251, ZNF548, ZNF248, SAMD1, RBM10, JUND, LOC720438, PHF12, PCGF2, MBD2, DNMT3A, DAB2IP, NR1H3, SIRT6, KLF2, ETV5, SAP30, GATAD2A, FAM220A, HIC2, EID2, MED25, NR6A1, BCL6B, PHF14, CALR, FGFR1, ATF4
GOTERM_BP_DIRECT	GO:0032956~regulation of actin cytoskeleton organization	8	0.776699	0.0243908	ARHGAP44, TRPM2, ROCK1, CAPN10, ARHGEF16, TAOK2, ARAP3, ARAP1
GOTERM_BP_DIRECT	GO:0045599~negative regulation of fat cell differentiation	6	0.582524	0.0266977	ASXL1, TRIO, SORT1, E2F1, AXIN1, LRP3
GOTERM_BP_DIRECT	GO:0002181~cytoplasmic translation	9	0.873786	0.0271499	LOC114677128, RPS29, LOC708074, RPL35A, RPL24, RPSA, LOC702723, RPL17, RPL19
GOTERM_BP_DIRECT	GO:0030036~actin cytoskeleton organization	14	1.35922	0.0274239	STARD13, ROCK1, MINK1, LIMK1, TESK1, WASL, PARVB, BCR, NISCH, MKLN1, DIAPH1, TAOK2, FLNA, FLNB
GOTERM_BP_DIRECT	GO:0034244~negative regulation of transcription elongation by RNA polymerase II	4	0.38835	0.0275139	RECQL5, AXIN1, SUPT4H1, NELFB
GOTERM_BP_DIRECT	GO:0006338~chromatin remodeling	14	1.35922	0.0286725	PBRM1, SMARCC1, INO80E, KDM4B, PCGF2, C4H6ORF89, CHD4, BAZ1B, CHD1, SMARCA4, TADA2B, TOP1, HDGFL3, BRD4
GOTERM_BP_DIRECT	GO:0006260~DNA replication	9	0.873786	0.0289848	RTEL1, RECQL5, CHAF1A, POLG2, LIG1, POLL, SSRP1, TOP1, CHTF18
GOTERM_BP_DIRECT	GO:0048675~axon extension	5	0.485437	0.0312854	SRF, DVL1, LIMK1, RAPH1, ULK2
GOTERM_BP_DIRECT	GO:0006289~nucleotide-excision repair	6	0.582524	0.032541	BRIP1, ERCC2, POLL, CAMK1, MNAT1, RAD23B
GOTERM_BP_DIRECT	GO:0006337~nucleosome disassembly	4	0.38835	0.0327574	SMARCC1, SMARCD2, SSRP1, SMARCA4
GOTERM_BP_DIRECT	GO:0006364~rRNA processing	10	0.970874	0.0360443	FBL, RPL5, RPL35A, DDX54, PIN4, LOC710642, REXO4, MDN1, MRM2, UTP14C
GOTERM_BP_DIRECT	GO:1901381~positive regulation of potassium ion transmembrane transport	3	0.291262	0.0364943	KCNQ1, AMIGO1, FLNA
GOTERM_BP_DIRECT	GO:0140058~neuron projection arborization	3	0.291262	0.0364943	TUBA1B, TUBA1A, ROCK1
GOTERM_BP_DIRECT	GO:0090521~podocyte cell migration	3	0.291262	0.0364943	KANK2, ROCK1, TESK1
GOTERM_BP_DIRECT	GO:0043583~ear development	3	0.291262	0.0364943	DDR1, TCF15, RDH10
GOTERM_BP_DIRECT	GO:0006623~protein targeting to vacuole	4	0.38835	0.0384812	GID4, TMEM50A, AP3D1, VPS37B
GOTERM_BP_DIRECT	GO:0046330~positive regulation of JNK cascade	9	0.873786	0.0418025	MFHAS1, TRAF3, MINK1, TAOK2, DAB2IP, AXIN1, DVL3, TRAF2, MAP3K11
GOTERM_BP_DIRECT	GO:0048477~oogenesis	5	0.485437	0.0439839	NANOS1, TERB2, PAQR7, SPDYA, ZAR1
GOTERM_BP_DIRECT	GO:0030041~actin filament polymerization	5	0.485437	0.0439839	DIAPH1, GSN, ARPC2, COBL, WASL
GOTERM_BP_DIRECT	GO:1900026~positive regulation of substrate adhesion-dependent cell spreading	5	0.485437	0.0439839	TESK1, FLNA, CALR, TRIOBP, UNC13D
GOTERM_BP_DIRECT	GO:0045039~protein insertion into mitochondrial inner membrane	3	0.291262	0.0472316	TOMM70, AGK, TIMM10
GOTERM_BP_DIRECT	GO:0051451~myoblast migration	3	0.291262	0.0472316	NET1, ROCK1, PLEKHO1
GOTERM_BP_DIRECT	GO:0008654~phospholipid biosynthetic process	5	0.485437	0.0487698	GPAT4, LPCAT1, SERAC1, AGPAT1, SERINC5

## Sheet: GO enrichment of module 2
GO enrichment of module 2 genes
Category	Term	Count	%	Pvalue	Genes
GOTERM_BP_DIRECT	GO:0045995~regulation of embryonic development	4	1.58103	0.00622699	TFPT, KAT2A, RUVBL2, SGF29
GOTERM_BP_DIRECT	GO:0006364~rRNA processing	5	1.97628	0.0174083	POP7, EXOSC4, IMP3, WDR18, WDR74
GOTERM_BP_DIRECT	GO:1902445~regulation of mitochondrial membrane permeability involved in programmed necrotic cell death	2	0.790514	0.0196852	PPIF, ALKBH7
GOTERM_BP_DIRECT	GO:0006753~nucleoside phosphate metabolic process	2	0.790514	0.0293828	NUDT14, RBKS
GOTERM_BP_DIRECT	GO:0019464~glycine decarboxylation via glycine cleavage system	2	0.790514	0.038985	GCSH, LOC698520
GOTERM_BP_DIRECT	GO:1990379~lipid transport across blood-brain barrier	2	0.790514	0.038985	SLC27A1, MFSD2A
GOTERM_BP_DIRECT	GO:0009249~protein lipoylation	2	0.790514	0.038985	GCSH, LOC698520
GOTERM_BP_DIRECT	GO:0000422~autophagy of mitochondrion	3	1.18577	0.0397494	FUNDC2, MAP1LC3A, ATG7

## Sheet: GO enrichment of module 3
GO enrichment of module 3 genes
Category	Term	Count	%	Pvalue	Genes
GOTERM_BP_DIRECT	GO:0006412~translation	74	17.2494	1.13841e-59	RPL4, RPL31, LOC114675582, LOC114669857, RPL9, MRPL33, RPS15, RPS14, RPL18A, RPS19, RPL36AL, RPL36, RPL35, RPL38, RPL37, LOC703455, RPS11, RPS13, LOC106996191, RPS9, RPL21, RPS7, LOC714171, RPS8, RPL23, RPS5, RPL13A, MRPS21, TRNAU1AP, LOC718737, LOC704012, EEF1A1, LOC712987, LOC695327, LOC694712, RPL37A, RPL26, LOC693947, RPL29, LOC106998255, RPL28, UBA52, LOC711174, RPL12, RPL11, LOC698197, RPS2…
GOTERM_BP_DIRECT	GO:0002181~cytoplasmic translation	21	4.8951	2.76871e-18	RWDD1, RPL30, LOC716530, LOC714171, RPL31, RPLP1, LOC720748, RPLP0, LOC697065, RPL9, RPS14, LOC706496, LOC701691, RPL36, RPL38, RPL26, RPL29, RPL18, RPS21, LOC106996346, RPS23
GOTERM_BP_DIRECT	GO:0032981~mitochondrial respiratory chain complex I assembly	15	3.4965	6.21247e-13	NDUFA6, NDUFB7, DMAC1, NDUFA11, NDUFB4, NDUFA2, NDUFB3, NDUFA1, NDUFB2, LOC114669847, NDUFAF8, NDUFS8, NDUFS5, NDUFAF2, LOC693506
GOTERM_BP_DIRECT	GO:0000028~ribosomal small subunit assembly	10	2.331	2.79317e-08	RPS15, RPS14, LOC701691, RPS27, RPS19, RPS5, LOC720748, RPS27L, LOC697065, LOC106996346
GOTERM_BP_DIRECT	GO:0006414~translational elongation	5	1.1655	0.000204899	EEF1A1, EEF1B2, LOC705310, EEF1D, RPLP1
GOTERM_BP_DIRECT	GO:0000398~mRNA splicing, via spliceosome	10	2.331	0.00121247	SART1, UBL5, LSM7, NCBP2, SNRPG, RNPC3, LSM5, SNRPC, LSM3, LOC114672822
GOTERM_BP_DIRECT	GO:0006826~iron ion transport	5	1.1655	0.0017718	FTH1, SLC11A2, LOC699053, FTHL17, LOC714576
GOTERM_BP_DIRECT	GO:0006879~intracellular iron ion homeostasis	6	1.3986	0.00275323	FTH1, LOC699053, FTHL17, LOC714576, BOLA2B, SOD1
GOTERM_BP_DIRECT	GO:0000027~ribosomal large subunit assembly	5	1.1655	0.00279608	LOC704012, MRPL20, RPLP0, RPL23A, LOC718737
GOTERM_BP_DIRECT	GO:0031204~post-translational protein targeting to membrane, translocation	3	0.699301	0.00567898	SEC61A2, SEC61B, SEC62
GOTERM_BP_DIRECT	GO:0042274~ribosomal small subunit biogenesis	5	1.1655	0.00697221	RPS9, RPS19BP1, RPS7, RPS13, RPS23
GOTERM_BP_DIRECT	GO:0015986~proton motive force-driven ATP synthesis	4	0.932401	0.00748726	LOC699117, ATP5MC2, ATP5MG, ATP5ME
GOTERM_BP_DIRECT	GO:0006123~mitochondrial electron transport, cytochrome c to oxygen	5	1.1655	0.0100913	LOC707227, LOC114671073, LOC106996000, LOC710274, COX6C
GOTERM_BP_DIRECT	GO:0000387~spliceosomal snRNP assembly	4	0.932401	0.0115311	SNRPG, SNRPD3, SNRPC, LOC114672822
GOTERM_BP_DIRECT	GO:0110076~negative regulation of ferroptosis	3	0.699301	0.0142228	FTH1, LOC699053, FTHL17
GOTERM_BP_DIRECT	GO:0033617~mitochondrial cytochrome c oxidase assembly	4	0.932401	0.016615	COX19, PET100, COX17, COA5
GOTERM_BP_DIRECT	GO:0031392~regulation of prostaglandin biosynthetic process	2	0.4662	0.0335956	FABP5, LOC106995978

## Sheet: GO enrichment of module 4
GO enrichment of module 4 genes
Category	Term	Count	%	Pvalue	Genes
GOTERM_BP_DIRECT	GO:0006886~intracellular protein transport	10	5.07614	0.000788513	AP3M2, NSF, RAB5B, COPB1, USO1, COPG1, AP2B1, RAB6A, NAPG, AP1M2
GOTERM_BP_DIRECT	GO:0016192~vesicle-mediated transport	9	4.56853	0.00104501	AP3M2, RAB2B, RAB4A, COPB1, COPG1, AP2B1, ARFGAP3, NAPG, AP1M2
GOTERM_BP_DIRECT	GO:0006891~intra-Golgi vesicle-mediated transport	4	2.03046	0.00233768	NSF, COPB1, COPG1, RAB6A
GOTERM_BP_DIRECT	GO:0006897~endocytosis	7	3.5533	0.00355254	AP3M2, MYO1E, RAB5B, CREG1, USP33, PPT1, ARFGAP3
GOTERM_BP_DIRECT	GO:0016236~macroautophagy	4	2.03046	0.00622699	RAB2B, TBC1D5, PLAA, VPS37A
GOTERM_BP_DIRECT	GO:0036503~ERAD pathway	5	2.53807	0.00652054	CCDC47, DNAJC10, SYVN1, DERL1, UBQLN1
GOTERM_BP_DIRECT	GO:0007042~lysosomal lumen acidification	3	1.52284	0.00706445	CREG1, ATP6AP2, PPT1
GOTERM_BP_DIRECT	GO:0006397~mRNA processing	6	3.04569	0.0195419	EFTUD2, DBR1, ESRP1, HNRNPF, CBLL1, SUGP2
GOTERM_BP_DIRECT	GO:0051453~regulation of intracellular pH	3	1.52284	0.0270659	SLC9A6, SLC9A8, TM9SF4
GOTERM_BP_DIRECT	GO:0015031~protein transport	8	4.06091	0.0281366	GLE1, NSF, RAB5B, RAB4A, SNX19, VAMP7, PPT1, ARFGAP3
GOTERM_BP_DIRECT	GO:0046886~positive regulation of hormone biosynthetic process	2	1.01523	0.0293828	ARNT, HIF1A
GOTERM_BP_DIRECT	GO:0006888~endoplasmic reticulum to Golgi vesicle-mediated transport	5	2.53807	0.0297577	SEC23IP, COPB1, YIPF4, USO1, COPG1
GOTERM_BP_DIRECT	GO:0019882~antigen processing and presentation	3	1.52284	0.0310783	RAB5B, RAB4A, RAB6A
GOTERM_BP_DIRECT	GO:0070536~protein K63-linked deubiquitination	3	1.52284	0.0310783	USP9X, USP33, BRCC3
GOTERM_BP_DIRECT	GO:0043161~proteasome-mediated ubiquitin-dependent protein catabolic process	7	3.5533	0.0370999	SMURF2, SYVN1, DERL1, PELI1, PLAA, KLHL12, UBE2A
GOTERM_BP_DIRECT	GO:0007611~learning or memory	3	1.52284	0.037504	NCSTN, LHX8, AFF2
GOTERM_BP_DIRECT	GO:1901137~carbohydrate derivative biosynthetic process	2	1.01523	0.038985	GFPT2, GFPT1
GOTERM_BP_DIRECT	GO:0006047~UDP-N-acetylglucosamine metabolic process	2	1.01523	0.038985	GFPT2, GFPT1

## Sheet: GO enrichment of module 5
GO enrichment of module 5 genes
Category	Term	Count	%	Pvalue	Genes
GOTERM_BP_DIRECT	GO:0006914~autophagy	7	2.38095	0.00303323	VCP, CALCOCO2, ULK3, VPS11, WIPI1, OPTN, FANCG
GOTERM_BP_DIRECT	GO:0006355~regulation of DNA-templated transcription	22	7.48299	0.00376565	PRMT5, ZNF274, ACTR5, CDCA7L, WWC2, PRMT3, ZFP69B, ZNF77, ZNF34, ZNF3, ZNF8, ZFP69, LOC114675589, ZNF749, ZNF416, KAT7, APBB2, ZNF589, ZNF225, PKNOX1, ZNF345, LOC709314
GOTERM_BP_DIRECT	GO:0098792~xenophagy	3	1.02041	0.00564509	RIPK2, ATG16L1, CALCOCO2
GOTERM_BP_DIRECT	GO:0006915~apoptotic process	11	3.7415	0.00682435	SH3GLB1, CASP9, TRAF7, RIPK2, LOC114674310, ELMO1, HSD17B4, CYCS, ELMO2, OGT, CIDEC
GOTERM_BP_DIRECT	GO:0023035~CD40 signaling pathway	3	1.02041	0.00718813	CD40, TRAF3IP2, TRAF5
GOTERM_BP_DIRECT	GO:0048870~cell motility	4	1.36054	0.0085673	CFL2, ELMO1, ELMO2, ACTB
GOTERM_BP_DIRECT	GO:0006886~intracellular protein transport	10	3.40136	0.0105324	RAB3B, ARF1, AP1G1, SCFD2, RAB3D, VPS11, SRPRA, COPG2, AP2M1, VPS16
GOTERM_BP_DIRECT	GO:0007033~vacuole organization	3	1.02041	0.0107719	VPS4A, VPS11, VPS16
GOTERM_BP_DIRECT	GO:0016192~vesicle-mediated transport	9	3.06122	0.0111189	HSPA8, ARF1, AP1G1, SCFD2, VPS11, HPS4, COPG2, ARFGAP2, VAMP3
GOTERM_BP_DIRECT	GO:0051301~cell division	9	3.06122	0.0123753	CENPT, HERC5, ANAPC7, CDCA7L, VPS4A, SETDB2, KIF14, ABRAXAS2, FSD1
GOTERM_BP_DIRECT	GO:0008299~isoprenoid biosynthetic process	3	1.02041	0.0128023	IDI1, COQ2, PDSS1
GOTERM_BP_DIRECT	GO:0000038~very long-chain fatty acid metabolic process	3	1.02041	0.0223997	ACOX1, ACSL1, HSD17B4
GOTERM_BP_DIRECT	GO:0042149~cellular response to glucose starvation	4	1.36054	0.0249217	SH3GLB1, SESN1, PRKAG1, ASNS
GOTERM_BP_DIRECT	GO:0097352~autophagosome maturation	4	1.36054	0.0280545	VCP, CHMP7, FANCG, VPS16
GOTERM_BP_DIRECT	GO:1903862~positive regulation of oxidative phosphorylation	2	0.680272	0.0290775	VCP, FANCG
GOTERM_BP_DIRECT	GO:0140455~cytoplasm protein quality control	2	0.680272	0.0290775	VCP, FANCG
GOTERM_BP_DIRECT	GO:0072389~flavin adenine dinucleotide catabolic process	2	0.680272	0.0290775	VCP, FANCG
GOTERM_BP_DIRECT	GO:0023019~signal transduction involved in regulation of gene expression	3	1.02041	0.0310168	TRAF3IP2, FIP1L1, TRAF5
GOTERM_BP_DIRECT	GO:0034620~cellular response to unfolded protein	3	1.02041	0.0310168	HSPA9, HSPA8, OPTN
GOTERM_BP_DIRECT	GO:0016601~Rac protein signal transduction	3	1.02041	0.0310168	FARP2, CYFIP1, ELMO1
GOTERM_BP_DIRECT	GO:0006904~vesicle docking involved in exocytosis	3	1.02041	0.0310168	RAB3B, RAB3D, VPS11
GOTERM_BP_DIRECT	GO:0035019~somatic stem cell population maintenance	4	1.36054	0.0313867	MED21, STAT3, BRAF, MED17
GOTERM_BP_DIRECT	GO:0006541~glutamine metabolic process	3	1.02041	0.034136	GLUD1, GMPS, CTPS1
GOTERM_BP_DIRECT	GO:0016226~iron-sulfur cluster assembly	3	1.02041	0.034136	HSPA9, NFS1, CIAO2B
GOTERM_BP_DIRECT	GO:0031647~regulation of protein stability	5	1.70068	0.0362214	HSPA8, TMEM183A, USP4, LMNA, FBXO7
GOTERM_BP_DIRECT	GO:0035331~negative regulation of hippo signaling	3	1.02041	0.0407193	VCP, WWC2, FANCG
GOTERM_BP_DIRECT	GO:1903006~positive regulation of protein K63-linked deubiquitination	2	0.680272	0.0432988	VCP, FANCG
GOTERM_BP_DIRECT	GO:0061857~endoplasmic reticulum stress-induced pre-emptive quality control	2	0.680272	0.0432988	VCP, FANCG
GOTERM_BP_DIRECT	GO:0051228~mitotic spindle disassembly	2	0.680272	0.0432988	VCP, FANCG
GOTERM_BP_DIRECT	GO:0032259~methylation	7	2.38095	0.0461406	METTL23, PRMT5, PRMT3, SETDB2, METTL6, ASH2L, TRMT1L

## Sheet: GO enrichment of module 6
GO enrichment of module 6 genes
Category	Term	Count	%	Pvalue	Genes
GOTERM_BP_DIRECT	GO:0071479~cellular response to ionizing radiation	5	2.55102	0.000406004	FIGNL1, GRB2, BRCA2, MAPK14, CLOCK
GOTERM_BP_DIRECT	GO:0006355~regulation of DNA-templated transcription	18	9.18367	0.0016135	ZNF331, KDM5A, ZNF430, ZNF460, ZNF680, CTR9, BRCA2, HCFC2, TAF5L, EMSY, MBTD1, NSD3, SBNO1, LOC100424371, TFDP1, LOC694126, YEATS2, FUBP1
GOTERM_BP_DIRECT	GO:0006357~regulation of transcription by RNA polymerase II	28	14.2857	0.00235541	ZNF451, GMEB1, CCNT2, CCNT1, TSHZ2, ZBTB21, ZBTB43, JMJD1C, CHD2, TAF5L, HIVEP1, SAFB2, TP63, ZHX2, ZNF680, VEZF1, HCFC2, SAFB, MED13L, TFDP1, YEATS2, SP1, FUBP1, LOC100423287, LCOR, ZNF236, CLOCK, LOC720388
GOTERM_BP_DIRECT	GO:0032786~positive regulation of DNA-templated transcription, elongation	3	1.53061	0.00345591	CCNT2, CCNT1, ERCC6
GOTERM_BP_DIRECT	GO:0006338~chromatin remodeling	7	3.57143	0.00563911	KDM5A, KDM4A, YEATS2, HCFC2, CHD2, MYSM1, TP63
GOTERM_BP_DIRECT	GO:0016579~protein deubiquitination	5	2.55102	0.0102244	USP37, USP53, USP45, ALG13, USP40
GOTERM_BP_DIRECT	GO:0035019~somatic stem cell population maintenance	4	2.04082	0.0117266	REST, ZHX2, RIF1, SMC1A
GOTERM_BP_DIRECT	GO:0043923~positive regulation by host of viral transcription	3	1.53061	0.0123845	CCNT1, SP1, RRP1B
GOTERM_BP_DIRECT	GO:0051726~regulation of cell cycle	6	3.06122	0.0165258	MBTD1, TFDP1, YEATS2, FIGNL1, XIAP, PHACTR4
GOTERM_BP_DIRECT	GO:0030036~actin cytoskeleton organization	6	3.06122	0.0223782	SPECC1, DAAM1, SPECC1L, GRB2, RICTOR, PHACTR4
GOTERM_BP_DIRECT	GO:0006974~DNA damage response	6	3.06122	0.0234761	SHPRH, MSL2, XIAP, SUSD6, CHD2, CLOCK
GOTERM_BP_DIRECT	GO:0006221~pyrimidine nucleotide biosynthetic process	2	1.02041	0.0298649	SLC4A7, CMPK1
GOTERM_BP_DIRECT	GO:0010468~regulation of gene expression	6	3.06122	0.0355429	KDM4A, REST, ZNF407, TSHZ2, RICTOR, AFF4
GOTERM_BP_DIRECT	GO:1903119~protein localization to actin cytoskeleton	2	1.02041	0.0396214	LUZP1, CTTNBP2NL
GOTERM_BP_DIRECT	GO:0000077~DNA damage checkpoint signaling	3	1.53061	0.0433094	ERCC6, MAPK14, CLOCK
GOTERM_BP_DIRECT	GO:0007519~skeletal muscle tissue development	3	1.53061	0.0481764	CCNT2, GPCPD1, MAPK14

## Sheet: GO enrichment  of module 7
GO enrichment of module 7 genes
Category	Term	Count	%	Pvalue	Genes
GOTERM_BP_DIRECT	GO:0110025~DNA strand resection involved in replication fork processing	2	4.08163	0.0167133	MRE11, EXO1
GOTERM_BP_DIRECT	GO:0007283~spermatogenesis	4	8.16327	0.0214266	DNAJA1, MAEL, RNF185, ROS1
GOTERM_BP_DIRECT	GO:0036092~phosphatidylinositol-3-phosphate biosynthetic process	2	4.08163	0.0284839	PIK3CA, PIK3C3
GOTERM_BP_DIRECT	GO:0048015~phosphatidylinositol-mediated signaling	2	4.08163	0.049325	PIK3CA, PIK3C3
GOTERM_BP_DIRECT	GO:0045022~early endosome to late endosome transport	2	4.08163	0.049325	SNX16, PIK3C3

## Sheet: GO enrichment of module 8
GO enrichment of module 8 genes
Category	Term	Count	%	Pvalue	Genes
GOTERM_BP_DIRECT	GO:0006281~DNA repair	28	2.33528	2.56497e-06	DCLRE1B, SMARCAL1, ERCC6L, BLM, PAXIP1, DCLRE1C, USP10, TTF2, BRCA1, SMC6, BACH1, RNF138, ALKBH1, RUVBL1, SMARCAD1, RFFL, MBD4, SUPT16H, RRM1, FANCM, PARP1, ATRX, SMARCA5, RPA1, LIG3, TAOK3, SPRTN, DNA2
GOTERM_BP_DIRECT	GO:0051301~cell division	31	2.58549	2.59576e-06	VPS4B, CDCA7, CDCA8, KIF11, SMC3, GNAI1, NCAPH, SEPTIN10, CCAR1, CDC42, SYCE1, ITPRIPL1, PTTG1, ZNF805, CMTR1, BORA, SEPTIN2, SPICE1, CDC5L, KNL1, CCNA2, TPX2, STAG1, CDK7, CCNG1, CDC16, MED20, MAPRE3, CEP63, MAD2L1, ARL8B
GOTERM_BP_DIRECT	GO:0006325~chromatin organization	23	1.91827	2.62873e-05	RNF20, BRD2, DAXX, HDAC1, CHD7, MSL3, ARID4B, DEK, HDAC9, RNF168, RBL2, MMS22L, HMGN4, MRGBP, TADA2A, RBBP4, LOC714902, LOC106995979, MTF2, SMARCAD1, EPC1, CMTR1, BANP
GOTERM_BP_DIRECT	GO:0006355~regulation of DNA-templated transcription	71	5.9216	2.77857e-05	NUP107, LOC714265, ZMYND8, SPIN3, NR3C2, CCAR1, RPS6KA5, ZNF805, ZNF84, ZNF280B, SAP130, ZNF280C, LOC695938, ZNF202, LIN52, PRMT6, ZNF441, ZNF682, BRD2, ZNF285, DAXX, ZFP1, SFMBT1, LOC719341, ZNF160, MSL3, ZNF10, TGIF2LX, MTF2, LOC701227, LOC709981, ZNF599, ZNF674, ZNF552, ZNF595, LOC720207, CDCA7, KRBA2, ZNF26, CUX1, RBBP4, LOC693611, LOC106995979, SOHLH2, ZNF549, NSD2, GPBP1L1, LOC708683, DMD, …
GOTERM_BP_DIRECT	GO:0006302~double-strand break repair	13	1.08424	0.000180927	EYA1, PARP1, PRKDC, SMC5, LIG3, ESCO2, SMC6, RNF168, SETX, MAD2L2, NBN, TRIP13, CMTR1
GOTERM_BP_DIRECT	GO:0006897~endocytosis	21	1.75146	0.000250971	DENND1C, CSNK1G3, FNBP1, ITSN1, GAPVD1, LIPA, CLINT1, C9ORF72, SORL1, EPN2, CDC42, MYO1B, CLCN5, NECAP2, MYO1C, NPC1, MYO6, PACSIN2, WASF2, SH3GL2, CSNK1G1
GOTERM_BP_DIRECT	GO:0006310~DNA recombination	12	1.00083	0.000404712	SUPV3L1, BLM, DCLRE1C, RUVBL1, RPA1, HMGB2, LIG4, SMC5, LIG3, BRCA1, SMC6, RFFL
GOTERM_BP_DIRECT	GO:0016567~protein ubiquitination	35	2.9191	0.000589451	USP10, LTN1, UBR2, TNFAIP1, TMEM131L, UBR1, RNF2, RPGR, DCAF1, HERC4, TRIM6, RNF114, RNF138, ARIH2, SPOP, PCMTD1, FBXO9, RNF20, PPIL2, FBXW5, KLHL3, MID1, RNF168, CNOT4, ITCH, KLHL7, ASB8, RFWD3, TRAF6, CDC16, RLIM, KCTD13, TRIM36, TRIM37, ASB3
GOTERM_BP_DIRECT	GO:0000122~negative regulation of transcription by RNA polymerase II	64	5.33778	0.000639092	ZMYND8, ZBTB26, HMGB2, ZNF45, RBPJ, DCAF1, UXT, ZNF805, SAP130, EPC1, HMG20A, ZNF202, PRMT6, ZNF441, ZBTB39, MORC3, MYOCD, RBM15, ZFP1, PARP1, ZNF10, ZBTB33, ZHX1, LOC699178, TGIF2LX, TRAF6, MED20, CRY1, STRAP, ZNF510, RAPGEF6, ZNF674, CGGBP1, ZNF552, CBFB, HDAC1, ZBTB49, HDAC9, BARX2, ZNF26, PHF21A, RNF2, ZBTB2, MIER2, TPR, NSD2, ZNF146, ZNF343, ATF7IP, PCGF6, ZNF461, CNBP, LOC720418, ZNF181, MA…
GOTERM_BP_DIRECT	GO:0008380~RNA splicing	16	1.33445	0.00118453	RBM25, NCBP1, WTAP, SFSWAP, USB1, CWC25, VIRMA, LOC713553, BCLAF1, LOC100424620, ZNF638, MAGOH, STRAP, RNPS1, SLU7, SRSF11
GOTERM_BP_DIRECT	GO:0006351~DNA-templated transcription	13	1.08424	0.00135362	TCEANC, CEBPG, TULP3, CCNA2, POLR3A, FUBP3, POLR3B, MTF1, POLR2C, POLR3E, TAF4B, GPBP1L1, SCAI
GOTERM_BP_DIRECT	GO:0007099~centriole replication	7	0.58382	0.0014035	CEP135, SASS6, POC1B, CCP110, RTTN, CEP85, CEP63
GOTERM_BP_DIRECT	GO:0000724~double-strand break repair via homologous recombination	15	1.25104	0.00158824	EXD2, BLM, KDM4D, ZMYND8, RPA1, SMC5, BRCA1, SMC6, HTATSF1, PALB2, MMS22L, RNF138, RFWD3, EPC1, NBN
GOTERM_BP_DIRECT	GO:0045739~positive regulation of DNA repair	8	0.667223	0.00173642	RNF168, EYA1, CEBPG, BRCA1, CCDC117, CMTR1, NFRKB, UCHL5
GOTERM_BP_DIRECT	GO:0001817~regulation of cytokine production	14	1.16764	0.0023475	ZNF441, ZBTB39, ZBTB49, ZBTB26, ZNF45, ZBTB33, LITAF, ZBTB2, ZNF805, BCL6, ZNF510, ZNF256, ZNF146, ZNF343
GOTERM_BP_DIRECT	GO:0006357~regulation of transcription by RNA polymerase II	111	9.25771	0.00290093	ATF1, SMARCAL1, ATF2, LOC714265, ZBTB26, ARID4B, RBPJ, BACH1, NR3C2, YY2, ZNF84, RUVBL1, ZNF449, EPC1, SUPT20H, CCNL1, LOC695938, ZNF202, ZNF441, ZBTB39, PIAS3, ZNF285, ZFP1, ZNF160, ZNF10, ZBTB33, MED6, ZSCAN22, ATF7, ZSCAN25, LOC709981, ZNF674, CGGBP1, ZNF552, CBFB, SMIM7, RLF, ZNF26, MED12L, ZBTB2, LOC693611, ZNF549, LOC708683, ZNF667, ZNF148, ZNF664, ZNF146, SMAD2, SMAD1, ZNF143, TCEANC, NFAT…
GOTERM_BP_DIRECT	GO:0006397~mRNA processing	19	1.58465	0.00310359	RBM27, RBM25, WTAP, TSEN15, SFSWAP, NSUN2, PCIF1, SSU72, GPATCH1, CWC25, USP39, VIRMA, LOC713553, BCLAF1, LOC100424620, PAPOLA, STRAP, RNPS1, TRMT61B
GOTERM_BP_DIRECT	GO:0000723~telomere maintenance	9	0.750626	0.0033498	DCLRE1B, SMG1, BLM, DCLRE1C, PRKDC, RUVBL1, NBN, NFRKB, UCHL5
GOTERM_BP_DIRECT	GO:0000729~DNA double-strand break processing	5	0.417014	0.00346799	EXD2, BLM, SMARCAD1, NBN, DNA2
GOTERM_BP_DIRECT	GO:0070936~protein K48-linked ubiquitination	13	1.08424	0.00382432	RNF34, KLHL3, BFAR, UBE2G2, TOPORS, TRIM6, ITCH, TTC3, CDC16, ARIH2, SKP2, RFFL, FBXO9
GOTERM_BP_DIRECT	GO:0051028~mRNA transport	8	0.667223	0.00415503	BCLAF1, NUP107, MAGOH, NUP35, NUP88, NUP98, HNRNPA1, NUP58
GOTERM_BP_DIRECT	GO:0002682~regulation of immune system process	13	1.08424	0.00419903	ZNF441, ZBTB39, ZBTB49, ZBTB26, ZNF45, ZBTB33, ZBTB2, ZNF805, BCL6, ZNF510, ZNF256, ZNF146, ZNF343
GOTERM_BP_DIRECT	GO:0000380~alternative mRNA splicing, via spliceosome	6	0.500417	0.00432101	DDX17, SFSWAP, STRAP, SRSF4, SRSF6, SLU7
GOTERM_BP_DIRECT	GO:0051865~protein autoubiquitination	10	0.834028	0.00493199	CNOT4, RNF10, ITCH, TRAF6, LTN1, BFAR, TRIM37, BRCA1, RNF141, RNFT1
GOTERM_BP_DIRECT	GO:0015031~protein transport	29	2.41868	0.00530165	NUP107, GDI1, STXBP1, GOSR1, IER3IP1, SDAD1, LIN7B, SEC61A1, LOC114677344, NUP62, PACSIN2, DAG1, NUP88, BBS7, AKIRIN2, MON2, YIPF5, COG1, SNX24, ACTN4, SNF8, ARCN1, RAB10, CHMP2B, CHMP2A, NUP35, NUP98, NUP58, ARL8B
GOTERM_BP_DIRECT	GO:0007094~mitotic spindle assembly checkpoint signaling	6	0.500417	0.00541155	TPR, BUB1B, KNTC1, TRIP13, HASPIN, MAD2L1
GOTERM_BP_DIRECT	GO:0045944~positive regulation of transcription by RNA polymerase II	59	4.92077	0.00587718	RNF10, CALCOCO1, CHD7, HMGB2, BRCA1, GABPB1, RPS6KA5, NAMPT, MLX, SMARCAD1, EPC1, DDX17, MYOCD, PPP1R12A, PARP1, ATRX, MRTFB, ZNF10, ACTN4, MED6, THRAP3, MTF1, TRAF6, IRF8, ATF7, KDM3A, TMF1, CBFB, PRKDC, HDAC1, ZBTB49, MED12L, LOC713553, IFT74, BCLAF1, ZNF148, RTRAF, RNF20, SMAD2, AKIRIN2, EYA1, NFYA, CNBP, ATAD2, NFATC3, SMARCA5, RFXANK, ACVR2A, SETX, CDK7, TFCP2, FUBP3, TTC5, ASXL3, KANSL3, BM…
GOTERM_BP_DIRECT	GO:0042254~ribosome biogenesis	9	0.750626	0.00651041	RIOK3, NOP2, SBDS, LOC106995551, SNU13, NAF1, RIOK1, LOC114676082, LOC106995720
GOTERM_BP_DIRECT	GO:0006370~7-methylguanosine mRNA capping	4	0.333611	0.00810773	RNGTT, NCBP1, ITGAE, CMTR1
GOTERM_BP_DIRECT	GO:0038020~insulin receptor recycling	3	0.250209	0.00919267	PTPN1, SORL1, PTPN2
GOTERM_BP_DIRECT	GO:0097051~establishment of protein localization to endoplasmic reticulum membrane	3	0.250209	0.00919267	RAB10, RAB3GAP2, RAB3GAP1
GOTERM_BP_DIRECT	GO:0050821~protein stabilization	18	1.50125	0.0101633	ATF7IP, USP36, GRN, MORC3, COG7, HSP90AB1, STXBP4, STK4, STK3, SAV1, UFL1, CDK7, BRINP1, BAG1, MFSD1, TRIM37, NAA15, CEP63
GOTERM_BP_DIRECT	GO:0001701~in utero embryonic development	20	1.66806	0.0106393	SMAD2, ATF2, C2CD3, DNAAF2, NXN, NSUN2, HM13, CHD7, ZFAND5, WDR19, ADAM10, LIG4, RPGRIP1L, ADAMTS3, TRAF6, ALKBH1, DHX35, GNA12, NMT1, FAM83D
GOTERM_BP_DIRECT	GO:0030330~DNA damage response, signal transduction by p53 class mediator	5	0.417014	0.0106445	PAXIP1, USP10, MYO6, ATRX, PPM1D
GOTERM_BP_DIRECT	GO:0006406~mRNA export from nucleus	7	0.58382	0.0110193	FYTTD1, NUP107, NCBP1, TPR, THOC3, NUP88, NUP160
GOTERM_BP_DIRECT	GO:0035520~monoubiquitinated protein deubiquitination	4	0.333611	0.0116557	USP47, USP15, USP10, USP1
GOTERM_BP_DIRECT	GO:0071539~protein localization to centrosome	6	0.500417	0.0117222	PCM1, STIL, C2CD3, CCDC14, CEP83, STK3
GOTERM_BP_DIRECT	GO:0045814~negative regulation of gene expression, epigenetic	6	0.500417	0.0117222	MTF2, TASOR, EPC1, TRIM37, PPM1D, HDAC9
GOTERM_BP_DIRECT	GO:0006275~regulation of DNA replication	7	0.58382	0.0126798	CCNA2, ESCO1, RUVBL1, POLE3, ESCO2, SMC3, NFRKB
GOTERM_BP_DIRECT	GO:0045089~positive regulation of innate immune response	5	0.417014	0.0133086	AKIRIN2, POLR3B, RIOK3, HMGB2, POLR3G
GOTERM_BP_DIRECT	GO:0045190~isotype switching	5	0.417014	0.0133086	ATAD5, SWAP70, LIG4, NBN, UNG
GOTERM_BP_DIRECT	GO:0043161~proteasome-mediated ubiquitin-dependent protein catabolic process	24	2.00167	0.0134509	RNF34, RNF24, NHLRC3, KLHL28, RHOBTB3, KLHL3, BFAR, KLHL23, TNFAIP1, KCTD5, TOPORS, PSMA8, DCAF1, PSMB7, ITCH, PSMA2, KLHL7, ARIH2, SPOP, KCTD13, UBXN7, RFFL, DTL, BIRC2
GOTERM_BP_DIRECT	GO:1901673~regulation of mitotic spindle assembly	6	0.500417	0.0138539	VPS4B, CHMP2B, TPR, CHMP2A, CEP97, CHMP6
GOTERM_BP_DIRECT	GO:0031297~replication fork processing	7	0.58382	0.0145082	EXD2, MMS22L, SMARCAL1, BLM, FANCM, RFWD3, ATRX
GOTERM_BP_DIRECT	GO:0072659~protein localization to plasma membrane	16	1.33445	0.0152068	ERRFI1, C2CD5, FYB2, TMEM150A, PPIL2, SH2D4B, STXBP1, RDX, DENND4C, ZDHHC3, CLN3, DLG1, CDH1, TSPAN3, EXOC5, RAPGEF6
GOTERM_BP_DIRECT	GO:1902043~positive regulation of extrinsic apoptotic signaling pathway via death domain receptors	4	0.333611	0.0159604	FAF1, STK4, BMPR1B, STK3
GOTERM_BP_DIRECT	GO:0031123~RNA 3'-end processing	4	0.333611	0.0159604	TUT7, PAPOLA, TENT2, MTPAP
GOTERM_BP_DIRECT	GO:0060041~retina development in camera-type eye	8	0.667223	0.0173951	RP1, TTLL5, AGTPBP1, CHD7, NPHP4, BMPR1B, SCAPER, MDM1
GOTERM_BP_DIRECT	GO:0046601~positive regulation of centriole replication	3	0.250209	0.017698	STIL, NUP62, SASS6
GOTERM_BP_DIRECT	GO:1903373~positive regulation of endoplasmic reticulum tubular network organization	3	0.250209	0.017698	RAB3GAP2, RAB3GAP1, LNPK
GOTERM_BP_DIRECT	GO:0090669~telomerase RNA stabilization	3	0.250209	0.017698	DKC1, PARN, NAF1
GOTERM_BP_DIRECT	GO:0016925~protein sumoylation	7	0.58382	0.0186986	PIAS3, UBE2I, EYA1, SUMO2, SAE1, TOPORS, LOC106995487
GOTERM_BP_DIRECT	GO:0051726~regulation of cell cycle	16	1.33445	0.0191175	CDKN2B, HSP90AB1, ZBTB49, TXLNG, UHMK1, RBL2, CDK7, MRGBP, TADA2A, ZZZ3, RUVBL1, TRIM36, EPC1, SKP2, NFRKB, BIRC2
GOTERM_BP_DIRECT	GO:0045893~positive regulation of DNA-templated transcription	26	2.16847	0.0194612	RNF10, BLM, SHC1, BRCA1, EDRF1, MED30, CDH1, NUP62, GPBP1L1, NFRKB, BANP, ATF7IP, MAP2K1, FZD4, MGA, ATAD2, MSL3, TOPORS, MLLT11, MAD2L2, CCNA2, ILF3, PITHD1, IRF8, MAPRE3, NAA15
GOTERM_BP_DIRECT	GO:0007064~mitotic sister chromatid cohesion	5	0.417014	0.0198189	PTTG1, ESCO1, ESCO2, HASPIN, SMC3
GOTERM_BP_DIRECT	GO:0008104~protein localization	13	1.08424	0.0213034	SCYL3, YWHAB, SEPTIN2, ITSN1, DDX42, CEP128, SEPTIN10, CDC42, AKAP11, YWHAQ, BCL6, DMD, BBS7
GOTERM_BP_DIRECT	GO:0051321~meiotic cell cycle	8	0.667223	0.0214245	WEE2, RPA1, TUBGCP3, NBN, TMEM131L, TUBGCP4, SMC3, PSMA8
GOTERM_BP_DIRECT	GO:0048278~vesicle docking	5	0.417014	0.0236933	STX12, STX17, STX7, CEP83, STX3
GOTERM_BP_DIRECT	GO:0035024~negative regulation of Rho protein signal transduction	5	0.417014	0.0236933	KANK1, BCL6, KCTD13, TNFAIP1, SCAI
GOTERM_BP_DIRECT	GO:1902774~late endosome to lysosome transport	5	0.417014	0.0236933	CHMP2B, CHMP2A, CHMP6, C9ORF72, ARL8B
GOTERM_BP_DIRECT	GO:0090398~cellular senescence	6	0.500417	0.0249405	PRMT6, CDKN2B, MAP2K1, OPA1, NUP62, SMC6
GOTERM_BP_DIRECT	GO:0000209~protein polyubiquitination	15	1.25104	0.0254691	RNF20, PPIL2, CBFB, NHLRC3, UBE3B, TOPORS, RNF114, UBE2Q1, UBE2Q2, ARIH2, SPOP, DTL, BIRC2, FBXL7, DZIP3
GOTERM_BP_DIRECT	GO:0010468~regulation of gene expression	18	1.50125	0.0261533	KDM4D, LOC705507, ATRX, CHD7, CEP128, MRPL44, UFL1, TRIM6, FUT8, HNRNPDL, RBBP4, FUBP3, LOC106995979, MLX, HMG20A, STX3, CGGBP1, MAP3K4
GOTERM_BP_DIRECT	GO:0000398~mRNA splicing, via spliceosome	16	1.33445	0.0263595	SF3B2, CDC5L, SNU13, PRPF40A, CWC25, HTATSF1, CDC40, LOC713553, PRPF3, CWF19L1, RNPS1, BUD13, SNRNP25, HNRNPA1, SRSF10, SLU7
GOTERM_BP_DIRECT	GO:0051603~proteolysis involved in protein catabolic process	7	0.58382	0.0264221	PSMB7, CASP8, PSMA2, UBE2G2, IDE, CLPX, LGMN
GOTERM_BP_DIRECT	GO:0160049~negative regulation of cGAS/STING signaling pathway	4	0.333611	0.0268952	PPP6C, LOC114675532, PARP1, PRKDC
GOTERM_BP_DIRECT	GO:0032880~regulation of protein localization	10	0.834028	0.0269375	FKBP1A, UFL1, TRIM6, BORA, PARP1, SEPTIN2, MMD, SWAP70, LOC705507, C9ORF72
GOTERM_BP_DIRECT	GO:0006606~protein import into nucleus	12	1.00083	0.0270561	ATF2, NUP107, NUP62, TPR, KPNA7, NUP88, NUP98, PTTG1IP, STK4, KPNA3, TNPO3, STK3
GOTERM_BP_DIRECT	GO:0048549~positive regulation of pinocytosis	3	0.250209	0.0283994	CDC42, CLN3, ANKFY1
GOTERM_BP_DIRECT	GO:0006055~CMP-N-acetylneuraminate biosynthetic process	3	0.250209	0.0283994	NANP, SLC35A1, CMAS
GOTERM_BP_DIRECT	GO:0032053~ciliary basal body organization	3	0.250209	0.0283994	CCP110, RTTN, DZIP1
GOTERM_BP_DIRECT	GO:0090481~pyrimidine nucleotide-sugar transmembrane transport	3	0.250209	0.0283994	SLC35A2, SLC35A1, SLC35A4
GOTERM_BP_DIRECT	GO:0010212~response to ionizing radiation	6	0.500417	0.0321437	RNF168, PAXIP1, DCLRE1C, EYA1, RFWD3, CMTR1
GOTERM_BP_DIRECT	GO:0032212~positive regulation of telomere maintenance via telomerase	5	0.417014	0.0327309	DKC1, NEK7, PARN, NAF1, HNRNPA1
GOTERM_BP_DIRECT	GO:0006417~regulation of translation	10	0.834028	0.0335639	DAZL, BCLAF1, MKNK1, IREB2, SERBP1, GEMIN5, CNOT10, MSI2, LOC713553, TNRC6B
GOTERM_BP_DIRECT	GO:0006915~apoptotic process	24	2.00167	0.0337511	ERRFI1, DFFA, CDKN2B, DAXX, RNF34, PARP1, LOC719232, SLC5A11, BCL10, STK4, PALB2, LOC713553, STK3, SAV1, XKR8, BCL2L13, CASP8, RPS6KB1, OPA1, CASP2, DMD, RFFL, BIRC2, MCM2
GOTERM_BP_DIRECT	GO:0006468~protein phosphorylation	34	2.8357	0.0347991	SCYL3, SMG1, PIK3R4, STK4, KALRN, MYLK, STK3, CAMKK2, STK31, RPS6KA5, AKT3, NEK1, MAP4K5, MAPK6, PAK2, CAMK2G, MAP3K4, SCYL2, PSKH1, MAP2K1, NEK5, RIOK3, EIF2AK1, STRADB, NEK7, HASPIN, ACVR2A, CDK7, WEE2, TAOK3, RPS6KB1, STK24, BMP2K, BMPR1B
GOTERM_BP_DIRECT	GO:0036297~interstrand cross-link repair	6	0.500417	0.0361839	DCLRE1B, DCLRE1C, FANCM, RFWD3, HMCES, SPRTN
GOTERM_BP_DIRECT	GO:0070534~protein K63-linked ubiquitination	8	0.667223	0.03728	RNF168, ITCH, TRAF6, ARIH2, UBR2, BFAR, SKP2, CMTR1
GOTERM_BP_DIRECT	GO:0071168~protein localization to chromatin	5	0.417014	0.037906	MMS22L, BRD2, PARP1, ZMYND8, ESCO2
GOTERM_BP_DIRECT	GO:0006260~DNA replication	10	0.834028	0.0385596	POLD3, SUPT16H, RRM1, BLM, RBBP4, LOC106995979, RPA1, LIG3, DNA2, MCM2
GOTERM_BP_DIRECT	GO:0000902~cell morphogenesis	11	0.917431	0.0391232	CDH3, BCL6, CDH1, STRADB, WDR19, POC1B, STK4, LIPA, FRYL, CDH18, SIDT2
GOTERM_BP_DIRECT	GO:0030336~negative regulation of cell migration	11	0.917431	0.0391232	RNF20, RAP2C, OSBPL8, KANK1, TCAF1, NAV3, STK24, CDH1, ZMYND8, DAG1, SCAI
GOTERM_BP_DIRECT	GO:0097352~autophagosome maturation	7	0.58382	0.0396436	CLN3, MAP1LC3B, CHMP2B, CHMP2A, LOC697790, PIK3R4, CHMP6
GOTERM_BP_DIRECT	GO:0001736~establishment of planar polarity	4	0.333611	0.0409241	FZD3, GRHL3, EXOC5, RPGRIP1L
GOTERM_BP_DIRECT	GO:0006636~unsaturated fatty acid biosynthetic process	4	0.333611	0.0409241	FADS3, ELOVL4, ELOVL5, FADS1
GOTERM_BP_DIRECT	GO:2001034~positive regulation of double-strand break repair via nonhomologous end joining	4	0.333611	0.0409241	MAD2L2, KDM4D, PRKDC, LOC114678803
GOTERM_BP_DIRECT	GO:0071932~replication fork reversal	3	0.250209	0.0410223	FANCM, PARP1, DNA2
GOTERM_BP_DIRECT	GO:1905821~positive regulation of chromosome condensation	3	0.250209	0.0410223	ITPRIPL1, SMC4, NCAPH
GOTERM_BP_DIRECT	GO:1990830~cellular response to leukemia inhibitory factor	10	0.834028	0.044038	BCLAF1, KDM3A, RNF138, FZD4, PIGA, MTF2, SMARCA5, NUP35, PARP16, ICAM1
GOTERM_BP_DIRECT	GO:0007417~central nervous system development	12	1.00083	0.0462463	ZNF143, MTF1, ZNF160, CHD7, ZNF76, LIG4, GRHL3, MSI2, ZSCAN25, STK4, ZNF664, STK3
GOTERM_BP_DIRECT	GO:0051457~maintenance of protein location in nucleus	4	0.333611	0.0490675	MORC3, ARL2BP, TAF3, TOPORS
GOTERM_BP_DIRECT	GO:0022038~corpus callosum development	4	0.333611	0.0490675	WDR47, WDR37, RPGRIP1L, WDR89
GOTERM_BP_DIRECT	GO:0030490~maturation of SSU-rRNA	4	0.333611	0.0490675	RIOK3, SNU13, SRFBP1, RIOK1
GOTERM_BP_DIRECT	GO:0046761~viral budding from plasma membrane	4	0.333611	0.0490675	VPS4B, CHMP2B, CHMP2A, CHMP6
GOTERM_BP_DIRECT	GO:0008625~extrinsic apoptotic signaling pathway via death domain receptors	5	0.417014	0.0495794	CASP8AP2, CASP8, HMGB2, STK4, STK3
