# Supplementary material
Source: Research Square preprint supplement (doi:10.21203/rs.3.rs-7771199/v1)
Supplement: Supplementary file 15 [file e5dbfa3a2e22c8e0683caa36.xlsx]

## Sheet: Peak-linked ZGA genes in O4C
Distal differential peaks linked to precocious ZGA genes in O4C					List of differential-peak-associated ZGA-activated genes
Seqname	Start	End	Gene symbol		Gene symbol
NC_041757.1	143343601	143343800	ABT1		ABT1
NC_041772.1	8244601	8245200	ANGPTL4		ANGPTL4
NC_041754.1	103399401	103399800	ANKRD35		ANKRD35
NC_041754.1	103405001	103405400	ANKRD35		ANKRD40
NC_041769.1	46097201	46097600	ANKRD40		ARGLU1
NC_041769.1	46074801	46075400	ANKRD40		ASNA1
NC_041769.1	46075601	46076000	ANKRD40		BAG4
NC_041769.1	46085401	46085800	ANKRD40		BECN2
NC_041769.1	46088801	46089000	ANKRD40		BIK
NC_041770.1	88161601	88162000	ARGLU1		C11H12orf50
NC_041772.1	12323001	12323600	ASNA1		C14H11orf98
NC_041761.1	38636001	38636200	BAG4		C15H9orf64
NC_041761.1	38645601	38646000	BAG4		C16H17orf58
NC_041754.1	7145001	7145600	BECN2		C4H6orf226
NC_041754.1	7127001	7127200	BECN2		CACNB3
NC_041763.1	8390401	8390800	BIK		CCDC126
NC_041764.1	87650801	87651200	C11H12orf50		CCDC28B
NC_041764.1	87624001	87624400	C11H12orf50		CCDC32
NC_041767.1	11536201	11536400	C14H11orf98		CCDC61
NC_041768.1	99264801	99265000	C15H9orf64		CDC23
NC_041769.1	64368601	64369200	C16H17orf58		CERS5
NC_041769.1	64361201	64361800	C16H17orf58		CGAS
NC_041757.1	126450201	126450600	C4H6orf226		CITED1
NC_041764.1	48409001	48409600	CACNB3		CTH
NC_041756.1	91510801	91511200	CCDC126		DAB2
NC_041754.1	192476001	192476600	CCDC28B		DDAH2
NC_041760.1	16995201	16995600	CCDC32		DIS3
NC_041760.1	16982201	16982600	CCDC32		DLK2
NC_041772.1	46108401	46108800	CCDC61		DUSP1
NC_041759.1	135626601	135627000	CDC23		E2F6
NC_041759.1	135629401	135630000	CDC23		EFNA1
NC_041759.1	135634201	135634400	CDC23		EMP3
NC_041759.1	135632601	135633000	CDC23		FAM200B
NC_041764.1	49780001	49780400	CERS5		FMR1NB
NC_041764.1	49801601	49802000	CERS5		GADD45B
NC_041764.1	49792801	49793000	CERS5		GALP
NC_041757.1	99502801	99503200	CGAS		GIP
NC_041774.1	69392601	69393400	CITED1		GPATCH3
NC_041754.1	154015401	154015600	CTH		GRWD1
NC_041754.1	154021801	154022200	CTH		GSC
NC_041759.1	39259601	39260000	DAB2		HEY1
NC_041759.1	39247201	39247400	DAB2		HIST1H2BH
NC_041757.1	137769001	137769400	DDAH2		HNRNPH1
NC_041770.1	54575601	54575800	DIS3		ID3
NC_041770.1	54651601	54652200	DIS3		IKZF5
NC_041770.1	54577601	54577800	DIS3		ISG15
NC_041770.1	54641801	54642400	DIS3		KCTD14
NC_041770.1	54582201	54582600	DIS3		KHDC1L
NC_041757.1	125879401	125879800	DLK2		KLF3
NC_041759.1	170131001	170131400	DUSP1		KLHL11
NC_041759.1	170107201	170107400	DUSP1		KPTN
NC_041759.1	170154001	170154600	DUSP1		KRT18
NC_041759.1	170121601	170122000	DUSP1		KTI12
NC_041759.1	170133801	170134200	DUSP1		L1TD1
NC_041759.1	170116201	170116600	DUSP1		LDHA
NC_041759.1	170159201	170159600	DUSP1		LOC100424830
NC_041766.1	97341801	97342200	E2F6		LOC100426884
NC_041766.1	97314201	97314600	E2F6		LOC100427058
NC_041766.1	97335001	97335400	E2F6		LOC100429174
NC_041754.1	95899201	95899600	EFNA1		LOC106993339
NC_041772.1	48326201	48326600	EMP3		LOC106994809
NC_041772.1	48323201	48323400	EMP3		LOC106994973
NC_041772.1	48327001	48327600	EMP3		LOC106995240
NC_041758.1	14668401	14668800	FAM200B		LOC106995568
NC_041774.1	144108601	144109200	FMR1NB		LOC106995630
NC_041774.1	144021601	144021800	FMR1NB		LOC106996785
NC_041774.1	143968801	143969000	FMR1NB		LOC106996966
NC_041774.1	143988801	143989400	FMR1NB		LOC106997516
NC_041774.1	143988201	143988600	FMR1NB		LOC106998587
NC_041772.1	2331201	2332200	GADD45B		LOC106998738
NC_041772.1	2327201	2327600	GADD45B		LOC106999058
NC_041772.1	55956601	55957000	GALP		LOC106999265
NC_041769.1	47817401	47817800	GIP		LOC107000921
NC_041769.1	47823801	47824200	GIP		LOC114672333
NC_041754.1	197858401	197858600	GPATCH3		LOC114674437
NC_041772.1	48418201	48418600	GRWD1		LOC114674748
NC_041760.1	156937001	156937400	GSC		LOC114676217
NC_041760.1	156901601	156901800	GSC		LOC114676571
NC_041760.1	156943801	156944000	GSC		LOC114676594
NC_041760.1	156937801	156938200	GSC		LOC114676799
NC_041761.1	80195801	80196200	HEY1		LOC114677385
NC_041757.1	143739401	143739800	HIST1H2BH		LOC114677579
NC_041759.1	176970201	176970800	HNRNPH1		LOC114677681
NC_041754.1	201199401	201200000	ID3		LOC114679652
NC_041754.1	201200401	201201200	ID3		LOC114680234
NC_041762.1	123444201	123444600	IKZF5		LOC114680387
NC_041754.1	223408201	223408800	ISG15		LOC694580
NC_041767.1	71114201	71114600	KCTD14		LOC696321
NC_041757.1	99703001	99703200	KHDC1L		LOC696959
NC_041758.1	37806201	37806600	KLF3		LOC704147
NC_041769.1	53007801	53008200	KLHL11		LOC705636
NC_041769.1	53002601	53003000	KLHL11		LOC706956
NC_041772.1	47517801	47518200	KPTN		LOC707602
NC_041764.1	52509001	52509800	KRT18		LOC707924
NC_041764.1	52505401	52505800	KRT18		LOC709523
NC_041764.1	52505001	52505200	KRT18		LOC711872
NC_041754.1	172429801	172430000	KTI12		LOC712661
NC_041754.1	162229801	162230200	L1TD1		LOC713295
NC_041754.1	162237801	162238200	L1TD1		LOC718280
NC_041767.1	47196001	47196400	LDHA		LOC718691
NC_041774.1	143021601	143022000	LOC100424830		LOC719250
NC_041774.1	142797401	142797600	LOC100424830		LOC720717
NC_041769.1	72957001	72957400	LOC100426884		LOC721289
NC_041773.1	62356601	62357000	LOC100427058		LOC722929
NC_041773.1	62340001	62340400	LOC100427058		MALSU1
NC_041759.1	42928601	42929400	LOC100429174		MAMU-E
NC_041759.1	42938801	42939600	LOC100429174		MRLN
NC_041767.1	56184401	56184800	LOC106993339		MTERF1
NC_041767.1	56211601	56211800	LOC106993339		MYC
NC_041772.1	47833201	47833400	LOC106994809		NMT2
NC_041772.1	47826201	47826600	LOC106994809		NOCT
NC_041773.1	20905201	20905400	LOC106994973		NOL11
NC_041773.1	20873601	20874200	LOC106994973		NRBF2
NC_041773.1	20909001	20909400	LOC106994973		NUPR1
NC_041773.1	20853001	20853600	LOC106994973		OVCA2
NC_041773.1	20917801	20918000	LOC106994973		PDCL3
NC_041773.1	20841201	20841400	LOC106994973		PHLDA2
NC_041773.1	20921601	20922200	LOC106994973		PIMREG
NC_041773.1	20807401	20807800	LOC106994973		PLEKHO2
NW_021160383.1	46601	47000	LOC106995240		PNO1
NC_041756.1	57917801	57918200	LOC106995568		POLR1C
NC_041761.1	12974201	12974600	LOC106995630		PRPH
NC_041761.1	12972401	12972600	LOC106995630		PTMA
NC_041755.1	154370401	154370800	LOC106996785		RBM7
NC_041755.1	91371601	91372000	LOC106996966		RELL1
NC_041755.1	91379201	91379800	LOC106996966		RHOXF2
NC_041755.1	91373801	91374000	LOC106996966		RIMKLB
NC_041755.1	91373201	91373600	LOC106996966		RITA1
NC_041755.1	91370601	91371000	LOC106996966		RPL7L1
NC_041755.1	91393801	91394000	LOC106996966		RPUSD2
NC_041755.1	91407201	91407600	LOC106996966		SLC1A6
NC_041755.1	91384201	91384600	LOC106996966		SLC8A2
NC_041755.1	91374201	91374600	LOC106996966		SNRPB
NC_041756.1	97579001	97579400	LOC106997516		SNUPN
NC_041756.1	97587801	97588000	LOC106997516		SOX4
NC_041756.1	97571601	97572000	LOC106997516		SRSF3
NC_041758.1	171696801	171697400	LOC106998587		STAM
NC_041759.1	42981401	42981800	LOC106998738		TCEA1
NC_041759.1	176041001	176041400	LOC106999058		TCEAL9
NC_041759.1	176035001	176035400	LOC106999058		TFAM
NC_041760.1	62980801	62981200	LOC106999265		TIMM8A
NC_041764.1	67254801	67255200	LOC107000921		TMSB10
NC_041764.1	67204401	67204600	LOC107000921		TOR1B
NC_041764.1	67328801	67329400	LOC107000921		TUBB
NC_041764.1	67250801	67251000	LOC107000921		TUBB6
NC_041767.1	83044001	83044400	LOC114672333		UTP6
NC_041773.1	9275201	9275600	LOC114674437		WSB1
NC_041773.1	9277401	9277800	LOC114674437		ZFP36L1
NC_041773.1	9160401	9161000	LOC114674437		ZFP42
NC_041773.1	9275801	9276400	LOC114674437		ZFYVE1
NC_041773.1	9233001	9233600	LOC114674437		ZIM3
NC_041773.1	9204801	9205000	LOC114674437		ZNF121
NC_041773.1	9205401	9205800	LOC114674437		ZNF878
NC_041773.1	9207201	9207400	LOC114674437		ZNHIT6
NC_041773.1	9298801	9299200	LOC114674437		ZYG11A
NC_041773.1	9249801	9250800	LOC114674437
NC_041773.1	9264201	9264600	LOC114674437
NC_041773.1	9170601	9170800	LOC114674437
NC_041773.1	9218801	9219400	LOC114674437
NC_041774.1	8023001	8023600	LOC114674748
NC_041774.1	7944601	7945000	LOC114674748
NC_041774.1	7878001	7878400	LOC114674748
NC_041774.1	7945601	7946000	LOC114674748
NC_041755.1	14191201	14191400	LOC114676217
NC_041755.1	14222401	14222800	LOC114676217
NC_041755.1	94870401	94870600	LOC114676571
NC_041755.1	94869401	94870000	LOC114676571
NC_041755.1	144223201	144223800	LOC114676594
NC_041755.1	144213401	144213600	LOC114676594
NC_041756.1	4672201	4672600	LOC114676799
NC_041757.1	56646801	56647200	LOC114677385
NC_041757.1	56566801	56567200	LOC114677385
NC_041757.1	56625001	56625400	LOC114677385
NC_041757.1	56594601	56594800	LOC114677385
NC_041757.1	56627001	56627200	LOC114677385
NC_041757.1	56573601	56574000	LOC114677385
NC_041757.1	109184601	109184800	LOC114677579
NC_041757.1	146573801	146574200	LOC114677681
NC_041757.1	146565401	146565600	LOC114677681
NC_041757.1	146728601	146729000	LOC114677681
NC_041757.1	146575201	146575600	LOC114677681
NC_041757.1	146626601	146627000	LOC114677681
NC_041757.1	146701801	146702000	LOC114677681
NC_041757.1	146581401	146582000	LOC114677681
NC_041757.1	146636001	146636400	LOC114677681
NC_041760.1	164361401	164361800	LOC114679652
NC_041761.1	40263201	40263600	LOC114680234
NC_041761.1	8142601	8142800	LOC114680387
NC_041771.1	64699601	64700000	LOC694580
NC_041771.1	64691001	64691400	LOC694580
NC_041771.1	64696001	64696600	LOC694580
NC_041774.1	117168801	117169200	LOC696321
NC_041765.1	60857401	60857800	LOC696959
NC_041765.1	60862601	60863000	LOC696959
NC_041765.1	60780201	60780600	LOC696959
NC_041761.1	67587401	67587600	LOC704147
NC_041756.1	70361201	70361800	LOC705636
NC_041756.1	70387001	70387200	LOC705636
NC_041762.1	58130401	58130800	LOC706956
NC_041774.1	6296001	6296400	LOC707602
NC_041761.1	126643401	126643600	LOC707924
NC_041761.1	126604201	126604800	LOC707924
NC_041772.1	56802801	56803200	LOC709523
NC_041760.1	168293201	168293600	LOC711872
NC_041760.1	168260001	168260400	LOC711872
NC_041760.1	168285801	168286000	LOC711872
NC_041768.1	64490801	64491200	LOC712661
NC_041768.1	64505401	64505800	LOC712661
NC_041768.1	64503401	64503800	LOC712661
NC_041768.1	64509201	64509800	LOC712661
NC_041772.1	36149001	36149400	LOC713295
NC_041759.1	17798601	17799000	LOC718280
NC_041759.1	17764201	17764600	LOC718280
NC_041759.1	17801201	17801600	LOC718280
NC_041759.1	17802201	17802800	LOC718280
NC_041759.1	17784801	17785000	LOC718280
NC_041763.1	19319201	19319600	LOC718691
NW_021160161.1	596201	596400	LOC719250
NC_041774.1	7794001	7794600	LOC720717
NC_041774.1	7825401	7825800	LOC720717
NC_041770.1	1380201	1380800	LOC721289
NC_041757.1	166983401	166983800	LOC722929
NC_041756.1	91806001	91806200	MALSU1
NC_041756.1	91793401	91794200	MALSU1
NC_041757.1	139399401	139399800	MAMU-E
NC_041757.1	139415001	139415600	MAMU-E
NC_041757.1	139393201	139393400	MAMU-E
NC_041762.1	78182001	78182200	MRLN
NC_041756.1	114207401	114207600	MTERF1
NC_041756.1	114221801	114222400	MTERF1
NC_041761.1	127961201	127961600	MYC
NC_041761.1	128123801	128124400	MYC
NC_041761.1	128004401	128004800	MYC
NC_041761.1	128047001	128047400	MYC
NC_041761.1	128091001	128091200	MYC
NC_041761.1	128081201	128081600	MYC
NC_041761.1	128114401	128114800	MYC
NC_041762.1	16330601	16331000	NMT2
NC_041758.1	136865201	136865400	NOCT
NC_041758.1	136908801	136909400	NOCT
NC_041758.1	136898801	136899000	NOCT
NC_041758.1	136921001	136921400	NOCT
NC_041758.1	136838801	136839200	NOCT
NC_041758.1	136832601	136832800	NOCT
NC_041758.1	136851801	136852400	NOCT
NC_041769.1	64037601	64038000	NOL11
NC_041769.1	64049201	64050000	NOL11
NC_041769.1	64029601	64030000	NOL11
NC_041769.1	64063601	64064000	NOL11
NC_041769.1	64027601	64027800	NOL11
NC_041762.1	74855801	74856000	NRBF2
NC_041773.1	27040801	27041400	NUPR1
NC_041769.1	1909401	1909800	OVCA2
NC_041766.1	4358601	4359000	PDCL3
NC_041766.1	4367801	4368400	PDCL3
NC_041767.1	3002601	3003200	PHLDA2
NC_041769.1	6235001	6235400	PIMREG
NC_041760.1	41371201	41371800	PLEKHO2
NC_041760.1	41365201	41365600	PLEKHO2
NC_041760.1	41370201	41370600	PLEKHO2
NC_041760.1	41379201	41379800	PLEKHO2
NC_041760.1	41390601	41390800	PLEKHO2
NC_041760.1	41401001	41401400	PLEKHO2
NC_041760.1	41380201	41380800	PLEKHO2
NC_041760.1	41408401	41409000	PLEKHO2
NC_041766.1	40583401	40584000	PNO1
NC_041766.1	40594201	40594600	PNO1
NC_041757.1	125804601	125805000	POLR1C
NC_041764.1	48912201	48912400	PRPH
NC_041765.1	119116001	119116400	PTMA
NC_041765.1	119117401	119118000	PTMA
NC_041765.1	119116801	119117200	PTMA
NC_041765.1	119122001	119122400	PTMA
NC_041765.1	119102401	119103000	PTMA
NC_041765.1	119098601	119099000	PTMA
NC_041767.1	107530401	107531000	RBM7
NC_041767.1	107547001	107547600	RBM7
NC_041767.1	107556601	107557200	RBM7
NC_041758.1	36812001	36812400	RELL1
NC_041758.1	36880201	36880400	RELL1
NC_041758.1	36781801	36782000	RELL1
NC_041758.1	36810001	36810600	RELL1
NC_041758.1	36784001	36784200	RELL1
NC_041758.1	36841801	36842200	RELL1
NC_041758.1	36783201	36783800	RELL1
NC_041758.1	36827801	36828000	RELL1
NC_041758.1	36828201	36828800	RELL1
NC_041774.1	116373001	116373400	RHOXF2
NC_041764.1	11019201	11019600	RIMKLB
NC_041764.1	11015001	11015200	RIMKLB
NC_041764.1	11061001	11061600	RIMKLB
NC_041764.1	112908001	112908600	RITA1
NC_041764.1	112904001	112904400	RITA1
NC_041757.1	126486801	126487200	RPL7L1
NC_041760.1	17007201	17007600	RPUSD2
NC_041772.1	14582401	14582800	SLC1A6
NC_041772.1	14563201	14563600	SLC1A6
NC_041772.1	14575801	14576200	SLC1A6
NC_041772.1	14553601	14554200	SLC1A6
NC_041772.1	47506401	47507000	SLC8A2
NC_041772.1	47462601	47463200	SLC8A2
NC_041763.1	64068801	64069400	SNRPB
NC_041763.1	64022001	64022200	SNRPB
NC_041763.1	64042201	64042600	SNRPB
NC_041760.1	52758601	52759000	SNUPN
NC_041757.1	148427001	148427600	SOX4
NC_041757.1	148410201	148410800	SOX4
NC_041757.1	148421601	148422200	SOX4
NC_041757.1	132869601	132870000	SRSF3
NC_041762.1	18824001	18824800	STAM
NC_041762.1	18809401	18809800	STAM
NC_041762.1	18802201	18802400	STAM
NC_041761.1	54668601	54669200	TCEA1
NC_041761.1	54638801	54639200	TCEA1
NC_041761.1	54653801	54654200	TCEA1
NC_041774.1	99929801	99930200	TCEAL9
NC_041762.1	79652601	79652800	TFAM
NC_041762.1	79625801	79626200	TFAM
NC_041762.1	79616401	79616600	TFAM
NC_041774.1	98177801	98178200	TIMM8A
NC_041766.1	23563801	23564200	TMSB10
NC_041768.1	10726001	10726400	TOR1B
NC_041768.1	10712201	10712600	TOR1B
NC_041768.1	10734001	10734400	TOR1B
NC_041757.1	139181801	139182200	TUBB
NC_041771.1	73022201	73022600	TUBB6
NC_041771.1	72988001	72988200	TUBB6
NC_041771.1	73016401	73017000	TUBB6
NC_041769.1	28152801	28153000	UTP6
NC_041769.1	28159801	28160200	UTP6
NC_041769.1	22921401	22922000	WSB1
NC_041760.1	130905401	130905800	ZFP36L1
NC_041758.1	185238201	185238600	ZFP42
NC_041758.1	185283201	185283600	ZFP42
NC_041760.1	135148001	135148600	ZFYVE1
NC_041772.1	56784201	56784600	ZIM3
NC_041772.1	56769801	56770200	ZIM3
NC_041772.1	9367801	9368200	ZNF121
NC_041772.1	9372601	9373200	ZNF121
NC_041772.1	11755801	11756400	ZNF878
NC_041772.1	11756601	11757000	ZNF878
NC_041754.1	138682001	138682400	ZNHIT6
NC_041754.1	138707201	138707400	ZNHIT6
NC_041754.1	138598801	138599200	ZNHIT6
NC_041754.1	138739201	138739600	ZNHIT6
NC_041754.1	138694601	138694800	ZNHIT6
NC_041754.1	138700601	138701000	ZNHIT6
NC_041754.1	138658201	138658800	ZNHIT6
NC_041754.1	138749601	138750000	ZNHIT6
NC_041754.1	138656801	138657600	ZNHIT6
NC_041754.1	171571201	171572200	ZYG11A
NC_041754.1	171564601	171565000	ZYG11A

## Sheet: Peak-linked ZGA-up genes in O8C
Distal differential peaks linked to upregulated ZGA genes in O8C					List of differential-peak-associated upregulated ZGA genes
Seqname	Start	End	Gene symbol		Gene symbol
NC_041757.1	143343601	143343800	ABT1		ABT1
NC_041768.1	64217201	64217600	ACER2		ACER2
NC_041768.1	64204601	64205200	ACER2		ACTG2
NC_041766.1	34923801	34924000	ACTG2		AKAP8
NC_041757.1	57411801	57412400	AKAP12		ALG5
NC_041757.1	57482001	57482600	AKAP12		ANKZF1
NC_041757.1	57499601	57500200	AKAP12		AQP3
NC_041757.1	57483601	57484000	AKAP12		ASL
NC_041757.1	57415601	57416000	AKAP12		ASNA1
NC_041757.1	57414201	57414400	AKAP12		BAG4
NC_041772.1	14961001	14961600	AKAP8		BAK1
NC_041772.1	14959401	14959800	AKAP8		BECN2
NC_041770.1	15832201	15832400	ALG5		C16H17orf58
NC_041772.1	8244601	8245200	ANGPTL4		CACNB3
NC_041772.1	8260201	8260600	ANGPTL4		CCNC
NC_041754.1	103399401	103399800	ANKRD35		CD14
NC_041754.1	103405001	103405400	ANKRD35		CDC23
NC_041769.1	46088801	46089000	ANKRD40		CEP85L
NC_041769.1	46075601	46076000	ANKRD40		CERS5
NC_041769.1	46085401	46085800	ANKRD40		CHCHD5
NC_041769.1	46097201	46097600	ANKRD40		CHORDC1
NC_041765.1	106670201	106670800	ANKZF1		CNKSR3
NC_041754.1	89730201	89730600	APOA2		COX7B2
NC_041768.1	50431001	50431600	AQP3		CUL2
NC_041770.1	88161601	88162000	ARGLU1		CXADR
NC_041758.1	77119401	77119800	ARL9		CXHXorf56
NC_041756.1	53800601	53801000	ASL		DAB2
NC_041772.1	12323001	12323600	ASNA1		DDX3Y
NC_041772.1	41132801	41133400	ATP1A3		DHRS7
NC_041772.1	41153801	41154400	ATP1A3		DIS3
NC_041772.1	41156401	41156800	ATP1A3		DNMT3L
NC_041772.1	41129401	41129800	ATP1A3		DPPA2
NC_041761.1	38636001	38636200	BAG4		E2F6
NC_041761.1	38645601	38646000	BAG4		EIF2S3
NC_041757.1	135951201	135951800	BAK1		EMP2
NC_041754.1	7127001	7127200	BECN2		ENO1
NC_041754.1	7145001	7145600	BECN2		FAM214B
NC_041763.1	8390401	8390800	BIK		FCF1
NC_041764.1	87624001	87624400	C11H12orf50		FMR1NB
NC_041764.1	87650801	87651200	C11H12orf50		FRMD4B
NC_041764.1	109707001	109707400	C11H12orf76		GALM
NC_041768.1	99264801	99265000	C15H9orf64		GNB4
NC_041769.1	64368601	64369200	C16H17orf58		GPATCH4
NC_041769.1	64361201	64361800	C16H17orf58		GRWD1
NC_041769.1	64365601	64366600	C16H17orf58		HK2
NC_041757.1	126450201	126450600	C4H6orf226		HNRNPH1
NC_041764.1	48409001	48409600	CACNB3		HSD17B14
NC_041756.1	91510801	91511200	CCDC126		IKZF5
NC_041754.1	192476001	192476600	CCDC28B		IMPDH1
NC_041760.1	16995201	16995600	CCDC32		ISG20L2
NC_041760.1	16982201	16982600	CCDC32		KDM5B
NC_041772.1	46108401	46108800	CCDC61		KITLG
NC_041772.1	7983601	7984000	CCL25		KLF5
NC_041772.1	7944801	7945400	CCL25		KLRG2
NC_041772.1	7949001	7949600	CCL25		KRBOX1
NC_041772.1	7955801	7956200	CCL25		KRT18
NC_041772.1	7937601	7938000	CCL25		KTI12
NC_041770.1	15390601	15390800	CCNA1		L1TD1
NC_041770.1	15380401	15380600	CCNA1		LDHA
NC_041757.1	73738001	73738400	CCNC		LDHB
NC_041757.1	73742401	73742800	CCNC		LIN28A
NC_041757.1	73734401	73734800	CCNC		LOC100425407
NC_041759.1	138010401	138010800	CD14		LOC100426639
NC_041759.1	135626601	135627000	CDC23		LOC100426884
NC_041759.1	135629401	135630000	CDC23		LOC100427058
NC_041757.1	22126001	22126200	CEP85L		LOC100430605
NC_041757.1	22181001	22181400	CEP85L		LOC106994967
NC_041757.1	22239001	22239600	CEP85L		LOC106996044
NC_041757.1	22171801	22172200	CEP85L		LOC106996814
NC_041757.1	22217601	22218000	CEP85L		LOC106998534
NC_041764.1	49801601	49802000	CERS5		LOC114675515
NC_041764.1	49792801	49793000	CERS5		LOC114676959
NC_041764.1	49780001	49780400	CERS5		LOC114677470
NC_041757.1	99502801	99503200	CGAS		LOC114677579
NC_041766.1	15749401	15750400	CHCHD5		LOC114680234
NC_041767.1	83851801	83852200	CHORDC1		LOC693330
NC_041767.1	83715801	83716000	CHORDC1		LOC693802
NC_041767.1	83337201	83337600	CHORDC1		LOC694593
NC_041767.1	83578201	83578800	CHORDC1		LOC696369
NC_041767.1	83325801	83326200	CHORDC1		LOC696854
NC_041767.1	83571001	83571400	CHORDC1		LOC696935
NC_041767.1	83411401	83411800	CHORDC1		LOC696959
NC_041767.1	83392601	83393000	CHORDC1		LOC698256
NC_041767.1	83604601	83604800	CHORDC1		LOC700113
NC_041767.1	83756401	83756800	CHORDC1		LOC703127
NC_041767.1	83738001	83738200	CHORDC1		LOC703490
NC_041774.1	69392601	69393400	CITED1		LOC704147
NC_041767.1	15891201	15891800	CLP1		LOC705636
NC_041757.1	60795001	60795200	CNKSR3		LOC707924
NC_041757.1	60797401	60797600	CNKSR3		LOC708657
NC_041757.1	60805401	60805600	CNKSR3		LOC709052
NC_041757.1	60765001	60765200	CNKSR3		LOC712661
NC_041757.1	60807201	60807400	CNKSR3		LOC719250
NC_041758.1	46054401	46054800	COX7B2		LOC721289
NC_041756.1	156565801	156566200	CPA2		MAGEB2
NC_041756.1	156571601	156572000	CPA2		MALSU1
NC_041756.1	156533001	156533400	CPA2		METAP1
NC_041756.1	156534801	156535200	CPA2		MFSD2A
NC_041773.1	62731801	62732000	CPHXL		MOAP1
NC_041773.1	62775401	62776000	CPHXL		MPLKIP
NC_041773.1	62725401	62725800	CPHXL		MRLN
NC_041773.1	62802001	62802400	CPHXL		MRPS5
NC_041773.1	62756801	62757000	CPHXL		MTERF1
NC_041773.1	62826601	62827200	CPHXL		NEFL
NC_041773.1	62816001	62816400	CPHXL		NOC2L
NC_041773.1	62875001	62875400	CPHXL		NOCT
NC_041773.1	62799601	62800000	CPHXL		NOL11
NC_041773.1	62846801	62847000	CPHXL		NONO
NC_041773.1	62823801	62824000	CPHXL		NOP14
NC_041773.1	62905401	62905600	CPHXL		NRBF2
NC_041773.1	62886201	62886400	CPHXL		PAGE2B
NC_041773.1	62784201	62784600	CPHXL		PDCL3
NC_041773.1	62893801	62894200	CPHXL		PGAM1
NC_041754.1	154015401	154015600	CTH		PIM1
NC_041754.1	154021801	154022200	CTH		PKN3
NC_041762.1	35998001	35998600	CUL2		PLS3
NC_041756.1	29358601	29359000	CXADR		PNO1
NC_041756.1	29359401	29359600	CXADR		POLR1C
NC_041774.1	115815001	115815400	CXHXorf56		PPA1
NC_041774.1	115807001	115807400	CXHXorf56		PPP1R14A
NC_041774.1	115802001	115802400	CXHXorf56		PRDM14
NC_041774.1	115800201	115800600	CXHXorf56		PRNP
NC_041759.1	39259601	39260000	DAB2		PRORP
NC_041759.1	39247201	39247400	DAB2		QTRT2
NC_041757.1	137769001	137769400	DDAH2		RAF1
NC_027914.1	2158601	2159400	DDX3Y		RBM19
NC_027914.1	2104801	2105000	DDX3Y		RBM7
NC_027914.1	2143201	2143600	DDX3Y		RBP7
NC_027914.1	2038401	2038600	DDX3Y		RIMKLB
NC_027914.1	2164801	2165200	DDX3Y		RPL22L1
NC_027914.1	2127601	2128000	DDX3Y		RPL7L1
NC_027914.1	2139801	2140000	DDX3Y		RPS4Y1
NC_027914.1	2061401	2062000	DDX3Y		RPS4Y2
NC_027914.1	2072801	2073200	DDX3Y		RPUSD2
NC_027914.1	2145401	2145800	DDX3Y		RRP12
NC_027914.1	2181001	2181600	DDX3Y		SESN2
NC_041754.1	109564801	109565000	DENND2C		SGK1
NC_041754.1	109548201	109548600	DENND2C		SLC5A6
NC_041754.1	109553801	109554200	DENND2C		SMIM10L1
NC_041772.1	48924201	48924800	DHDH		SNRPB
NC_041760.1	122242601	122242800	DHRS7		SOX4
NC_041760.1	122248401	122248800	DHRS7		SRSF3
NC_041760.1	122239401	122239800	DHRS7		SURF6
NC_041760.1	122251201	122251800	DHRS7		TAF11
NC_041770.1	54651601	54652200	DIS3		TBRG4
NC_041770.1	54575601	54575800	DIS3		TCEA1
NC_041770.1	54641801	54642400	DIS3		TCEAL9
NC_041770.1	54577601	54577800	DIS3		TEX19
NC_041770.1	54582201	54582600	DIS3		TFAM
NC_041757.1	125879401	125879800	DLK2		TGS1
NC_041756.1	2460601	2461000	DNMT3L		THOC5
NC_041756.1	2459801	2460200	DNMT3L		TRAF4
NC_041755.1	166861201	166861600	DPPA2		TRIM14
NC_041755.1	166911801	166912200	DPPA2		TTC27
NC_041755.1	166879401	166879800	DPPA2		TUBB
NC_041759.1	170159201	170159600	DUSP1		TUBB4A
NC_041759.1	170154001	170154600	DUSP1		TUBB6
NC_041759.1	170116201	170116600	DUSP1		TYROBP
NC_041759.1	170131001	170131400	DUSP1		UTP25
NC_041759.1	170107201	170107400	DUSP1		UTP6
NC_041759.1	170121601	170122000	DUSP1		WDR3
NC_041759.1	170133801	170134200	DUSP1		WDR45
NC_041766.1	97314201	97314600	E2F6		WDR55
NC_041766.1	97335001	97335400	E2F6		WSB1
NC_041766.1	97341801	97342200	E2F6		ZBTB8A
NC_041754.1	95899201	95899600	EFNA1		ZBTB8OS
NC_041774.1	23905401	23905800	EIF2S3		ZIM3
NC_041773.1	10545801	10546200	EMP2		ZYG11A
NC_041773.1	10547601	10547800	EMP2
NC_041773.1	10546401	10546800	EMP2
NC_041772.1	48327001	48327600	EMP3
NC_041772.1	48326201	48326600	EMP3
NC_041754.1	215653201	215653400	ENO1
NC_041758.1	14668401	14668800	FAM200B
NC_041768.1	49106201	49106600	FAM214B
NC_041760.1	136836401	136836800	FCF1
NC_041774.1	144108601	144109200	FMR1NB
NC_041774.1	144021601	144021800	FMR1NB
NC_041774.1	143988201	143988600	FMR1NB
NC_041774.1	143968801	143969000	FMR1NB
NC_041760.1	137400801	137401400	FOS
NC_041755.1	125511001	125511200	FRMD4B
NC_041755.1	125473401	125473800	FRMD4B
NC_041755.1	125528801	125529200	FRMD4B
NC_041755.1	125527201	125527400	FRMD4B
NC_041755.1	125748601	125749400	FRMD4B
NC_041755.1	125417001	125417400	FRMD4B
NC_041755.1	125396001	125396400	FRMD4B
NC_041755.1	125374001	125374400	FRMD4B
NC_041755.1	125681401	125681600	FRMD4B
NC_041755.1	125425801	125426200	FRMD4B
NC_041755.1	125418801	125419200	FRMD4B
NC_041755.1	125389401	125389800	FRMD4B
NC_041755.1	125460201	125460800	FRMD4B
NC_041755.1	125701801	125702200	FRMD4B
NC_041772.1	2327201	2327600	GADD45B
NC_041772.1	2331201	2332200	GADD45B
NC_041766.1	70235201	70235600	GALM
NC_041772.1	55949801	55950200	GALP
NC_041772.1	55956601	55957000	GALP
NC_041769.1	47817401	47817800	GIP
NC_041769.1	47823801	47824200	GIP
NC_041755.1	84574001	84574400	GNB4
NC_041755.1	84574601	84575000	GNB4
NC_041755.1	84559801	84560200	GNB4
NC_041755.1	84586201	84586800	GNB4
NC_041755.1	84589401	84589800	GNB4
NC_041755.1	84568601	84569000	GNB4
NC_041761.1	25648001	25648800	GNRH1
NC_041761.1	25663401	25664200	GNRH1
NC_041761.1	25655401	25656000	GNRH1
NC_041754.1	197858401	197858600	GPATCH3
NC_041754.1	94368001	94368400	GPATCH4
NC_041772.1	48418201	48418600	GRWD1
NC_041760.1	156901601	156901800	GSC
NC_041760.1	156943801	156944000	GSC
NC_041760.1	156937801	156938200	GSC
NC_041760.1	156937001	156937400	GSC
NC_041761.1	80195801	80196200	HEY1
NC_041757.1	143886401	143886800	HIST1H1T
NC_041757.1	144278401	144278600	HIST1H2AA
NC_041757.1	143856601	143857000	HIST1H2AC
NC_041757.1	142397201	142397400	HIST1H2AK
NC_041757.1	142398601	142398800	HIST1H2AK
NC_041757.1	143739401	143739800	HIST1H2BH
NC_041766.1	33981201	33981400	HK2
NC_041766.1	33980001	33980400	HK2
NC_041766.1	33942801	33943800	HK2
NC_041766.1	34007601	34008200	HK2
NC_041772.1	3456801	3457400	HMG20B
NC_041772.1	3455401	3455800	HMG20B
NC_041763.1	16164201	16164600	HMOX1
NC_041763.1	16197001	16197600	HMOX1
NC_041759.1	175546201	175546600	HNRNPAB
NC_041759.1	175522401	175523000	HNRNPAB
NC_041759.1	175538601	175538800	HNRNPAB
NC_041759.1	176970201	176970800	HNRNPH1
NC_041772.1	48814601	48815000	HSD17B14
NC_041772.1	10125001	10125400	ICAM3
NC_041772.1	10100201	10100600	ICAM3
NC_041754.1	201200401	201201200	ID3
NC_041754.1	201199401	201200000	ID3
NC_041757.1	139154401	139154800	IER3
NC_041757.1	139151601	139152000	IER3
NC_041757.1	139160201	139160600	IER3
NC_041762.1	123444201	123444600	IKZF5
NC_041756.1	154867601	154867800	IMPDH1
NC_041754.1	223408201	223408800	ISG15
NC_041754.1	94243201	94243600	ISG20L2
NC_041767.1	71114201	71114600	KCTD14
NC_041754.1	60222001	60222200	KDM5B
NC_041754.1	60198601	60199000	KDM5B
NC_041754.1	60227001	60227400	KDM5B
NC_041754.1	60195601	60196000	KDM5B
NC_041754.1	60225801	60226200	KDM5B
NC_041754.1	60219401	60219800	KDM5B
NC_041757.1	99703001	99703200	KHDC1L
NC_041764.1	88215201	88215400	KITLG
NC_041761.1	102917401	102917800	KLF10
NC_041754.1	180288001	180288600	KLF18
NC_041770.1	54875001	54875400	KLF5
NC_041770.1	54857601	54858200	KLF5
NC_041770.1	54872601	54873000	KLF5
NC_041769.1	53002601	53003000	KLHL11
NC_041769.1	53007801	53008200	KLHL11
NC_041756.1	165910801	165911200	KLRG2
NC_041756.1	165907601	165908200	KLRG2
NC_041772.1	47517801	47518200	KPTN
NC_041755.1	98892801	98893000	KRBOX1
NC_041755.1	98874601	98875200	KRBOX1
NC_041764.1	52506201	52506400	KRT18
NC_041764.1	52505401	52505800	KRT18
NC_041764.1	52505001	52505200	KRT18
NC_041764.1	52444801	52445400	KRT8
NC_041754.1	172429801	172430000	KTI12
NC_041754.1	162229801	162230200	L1TD1
NC_041754.1	162237801	162238200	L1TD1
NC_041767.1	47196001	47196400	LDHA
NC_041764.1	23025801	23026000	LDHB
NC_041764.1	23025201	23025600	LDHB
NC_041764.1	23050601	23051400	LDHB
NC_041764.1	23044801	23045200	LDHB
NC_041764.1	23057201	23057800	LDHB
NC_041764.1	23024601	23025000	LDHB
NC_041764.1	23043201	23043600	LDHB
NC_041764.1	23049801	23050400	LDHB
NC_041754.1	198370201	198370800	LIN28A
NC_041754.1	198363401	198363600	LIN28A
NC_041761.1	86087401	86087800	LOC100423594
NC_041761.1	86107801	86108200	LOC100423594
NC_041774.1	142797401	142797600	LOC100424830
NC_041774.1	143021601	143022000	LOC100424830
NC_041755.1	108121801	108122600	LOC100425407
NC_041754.1	184455801	184456800	LOC100426639
NC_041754.1	184457201	184457800	LOC100426639
NC_041769.1	72957001	72957400	LOC100426884
NC_041773.1	62356601	62357000	LOC100427058
NC_041773.1	62340001	62340400	LOC100427058
NC_041754.1	211606201	211606400	LOC100427847
NC_041755.1	149229601	149230000	LOC100429047
NC_041759.1	42938801	42939600	LOC100429174
NC_041759.1	42928601	42929400	LOC100429174
NC_041763.1	43328401	43328800	LOC100430605
NC_041763.1	43325001	43325800	LOC100430605
NC_041763.1	43355601	43356000	LOC100430605
NC_041767.1	56211601	56211800	LOC106993339
NC_041767.1	56184401	56184800	LOC106993339
NC_041772.1	4684001	4684400	LOC106994612
NC_041772.1	4695801	4696200	LOC106994612
NC_041772.1	4686601	4687200	LOC106994612
NC_041772.1	4691801	4692200	LOC106994612
NC_041772.1	39236601	39237000	LOC106994764
NC_041772.1	39235201	39235800	LOC106994764
NC_041772.1	47833201	47833400	LOC106994809
NC_041772.1	47826201	47826600	LOC106994809
NC_041772.1	55546601	55547000	LOC106994869
NC_041772.1	55555201	55555800	LOC106994869
NC_041773.1	14960601	14961000	LOC106994967
NC_041773.1	14944001	14944400	LOC106994967
NC_041773.1	20905201	20905400	LOC106994973
NC_041773.1	20917801	20918000	LOC106994973
NC_041773.1	20909001	20909400	LOC106994973
NC_041773.1	20921601	20922200	LOC106994973
NC_041773.1	20853001	20853600	LOC106994973
NC_041773.1	20807401	20807800	LOC106994973
NC_041773.1	20873601	20874200	LOC106994973
NC_041773.1	20841201	20841400	LOC106994973
NC_041773.1	20810201	20811200	LOC106994973
NW_021160383.1	46601	47000	LOC106995240
NC_041756.1	57917801	57918200	LOC106995568
NC_041761.1	12974201	12974600	LOC106995630
NC_041761.1	12972401	12972600	LOC106995630
NC_041759.1	94318801	94319200	LOC106995639
NC_041759.1	94313401	94314000	LOC106995639
NC_041774.1	52321601	52322200	LOC106996044
NW_021161596.1	191401	192000	LOC106996277
NW_021161596.1	199001	199400	LOC106996277
NW_021161596.1	211601	212000	LOC106996277
NW_021161596.1	192401	193000	LOC106996277
NW_021161686.1	29401	29600	LOC106996730
NC_041755.1	154370401	154370800	LOC106996785
NC_041755.1	146541001	146541400	LOC106996814
NC_041755.1	123783201	123783600	LOC106996871
NC_041755.1	91374201	91374600	LOC106996966
NC_041755.1	91379201	91379800	LOC106996966
NC_041755.1	91371601	91372000	LOC106996966
NC_041755.1	91370601	91371000	LOC106996966
NC_041755.1	91373201	91373600	LOC106996966
NC_041755.1	91373801	91374000	LOC106996966
NC_041755.1	91393801	91394000	LOC106996966
NC_041755.1	91384201	91384600	LOC106996966
NC_041755.1	91407201	91407600	LOC106996966
NC_041756.1	97571601	97572000	LOC106997516
NC_041756.1	97579001	97579400	LOC106997516
NC_041756.1	97587801	97588000	LOC106997516
NC_041754.1	191410401	191410800	LOC106997577
NC_041758.1	146562801	146563000	LOC106998534
NC_041758.1	146555801	146556400	LOC106998534
NC_041758.1	146497401	146497800	LOC106998534
NC_041758.1	146497001	146497200	LOC106998534
NC_041758.1	171696801	171697400	LOC106998587
NC_041759.1	14901001	14901400	LOC106998665
NC_041759.1	42981401	42981800	LOC106998738
NC_041759.1	176035001	176035400	LOC106999058
NC_041759.1	176041001	176041400	LOC106999058
NC_041760.1	62980801	62981200	LOC106999265
NW_021161596.1	65001	65200	LOC106999679
NC_041761.1	63736401	63736600	LOC106999787
NC_041761.1	63740001	63740400	LOC106999787
NC_041764.1	27956601	27957000	LOC107000802
NC_041764.1	27816601	27817000	LOC107000802
NC_041764.1	27856401	27856800	LOC107000802
NC_041764.1	27952201	27952600	LOC107000802
NC_041764.1	67328801	67329400	LOC107000921
NC_041764.1	67250801	67251000	LOC107000921
NC_041764.1	67254801	67255200	LOC107000921
NC_041764.1	67204401	67204600	LOC107000921
NC_041764.1	91939801	91940200	LOC107000967
NC_041757.1	138078801	138079200	LOC114669767
NC_041772.1	47880201	47880800	LOC114669784
NC_041772.1	47871201	47871600	LOC114669784
NC_041772.1	47865201	47865800	LOC114669784
NC_041764.1	128446801	128447200	LOC114671182
NC_041764.1	128479601	128479800	LOC114671182
NC_041764.1	128468801	128469200	LOC114671182
NC_041764.1	128551801	128552000	LOC114671182
NC_041765.1	20925601	20926000	LOC114671317
NC_041765.1	20898201	20898400	LOC114671317
NC_041766.1	12186001	12186600	LOC114671901
NC_041766.1	12200201	12200800	LOC114671901
NC_041766.1	98346001	98346400	LOC114672021
NC_041766.1	98337401	98337800	LOC114672021
NC_041766.1	98342801	98343400	LOC114672021
NC_041766.1	98348001	98348600	LOC114672021
NC_041766.1	98319801	98320200	LOC114672021
NC_041766.1	98325201	98325600	LOC114672021
NC_041767.1	83044001	83044400	LOC114672333
NC_041767.1	64671801	64672000	LOC114672504
NC_041767.1	64687001	64687400	LOC114672504
NC_041767.1	3018801	3019600	LOC114672538
NC_041767.1	3029801	3030400	LOC114672538
NC_041767.1	3022801	3023200	LOC114672538
NC_041769.1	6905801	6906200	LOC114673045
NC_041769.1	6910001	6910600	LOC114673045
NC_041769.1	6907401	6908000	LOC114673045
NC_041769.1	6916601	6917000	LOC114673045
NC_041769.1	6908601	6908800	LOC114673045
NC_041769.1	6904801	6905200	LOC114673045
NC_041769.1	73467001	73467800	LOC114673307
NC_041769.1	73396601	73397000	LOC114673307
NC_041769.1	73406001	73406200	LOC114673307
NC_041769.1	60705401	60705600	LOC114673317
NC_041769.1	60734201	60734600	LOC114673317
NC_041769.1	60731601	60732000	LOC114673317
NC_041770.1	23875601	23876600	LOC114673616
NC_041770.1	23874801	23875200	LOC114673616
NC_041772.1	13849201	13849600	LOC114674042
NC_041772.1	13850801	13851400	LOC114674042
NC_041772.1	13864801	13865200	LOC114674042
NC_041772.1	13830601	13831200	LOC114674042
NC_041772.1	669401	670000	LOC114674229
NC_041773.1	9207201	9207400	LOC114674437
NC_041773.1	9204801	9205000	LOC114674437
NC_041773.1	9218801	9219400	LOC114674437
NC_041773.1	9275801	9276400	LOC114674437
NC_041773.1	9277401	9277800	LOC114674437
NC_041773.1	9170601	9170800	LOC114674437
NC_041773.1	9205401	9205800	LOC114674437
NC_041773.1	9233001	9233600	LOC114674437
NC_041773.1	9298801	9299200	LOC114674437
NC_041773.1	9160401	9161000	LOC114674437
NC_041773.1	9275201	9275600	LOC114674437
NC_041773.1	9264201	9264600	LOC114674437
NC_041773.1	9249801	9250800	LOC114674437
NC_041754.1	102012001	102012400	LOC114674648
NC_041774.1	8080801	8081200	LOC114674748
NC_041774.1	7944601	7945000	LOC114674748
NC_041774.1	8023001	8023600	LOC114674748
NC_041774.1	7878001	7878400	LOC114674748
NC_041774.1	7945601	7946000	LOC114674748
NC_041774.1	8080201	8080600	LOC114674748
NW_021160211.1	122801	123000	LOC114675428
NW_021160293.1	21001	21400	LOC114675515
NW_021160365.1	48001	48400	LOC114675588
NW_021160365.1	40201	40600	LOC114675588
NW_021161355.1	13001	13400	LOC114675820
NW_021161355.1	11601	12000	LOC114675820
NC_041755.1	14222401	14222800	LOC114676217
NC_041755.1	168098401	168098800	LOC114676439
NC_041755.1	168055201	168055800	LOC114676439
NC_041755.1	168057201	168057600	LOC114676439
NC_041755.1	168046401	168046800	LOC114676439
NC_041755.1	94869401	94870000	LOC114676571
NC_041755.1	94870401	94870600	LOC114676571
NC_041755.1	144213401	144213600	LOC114676594
NC_041755.1	144223201	144223800	LOC114676594
NC_041756.1	4672201	4672600	LOC114676799
NC_041756.1	37664601	37665000	LOC114676867
NC_041756.1	37632001	37632400	LOC114676867
NC_041756.1	88918801	88919200	LOC114676959
NC_041756.1	14151401	14151800	LOC114677240
NC_041756.1	14157401	14157800	LOC114677240
NC_041757.1	56627001	56627200	LOC114677385
NC_041757.1	56625001	56625400	LOC114677385
NC_041757.1	56573601	56574000	LOC114677385
NC_041757.1	56566801	56567200	LOC114677385
NC_041757.1	56646801	56647200	LOC114677385
NC_041757.1	56594601	56594800	LOC114677385
NC_041757.1	21310601	21311000	LOC114677470
NC_041757.1	21359801	21360200	LOC114677470
NC_041757.1	109184601	109184800	LOC114677579
NC_041757.1	146636001	146636400	LOC114677681
NC_041757.1	146728601	146729000	LOC114677681
NC_041757.1	146565401	146565600	LOC114677681
NC_041757.1	146701801	146702000	LOC114677681
NC_041757.1	146581401	146582000	LOC114677681
NC_041757.1	146575201	146575600	LOC114677681
NC_041757.1	146626601	146627000	LOC114677681
NC_041757.1	36385601	36385800	LOC114677884
NC_041758.1	116567001	116567400	LOC114678573
NC_041758.1	80930401	80930800	LOC114678582
NC_041759.1	109625601	109626000	LOC114679157
NC_041759.1	64796801	64797400	LOC114679207
NC_041759.1	64793001	64793600	LOC114679207
NC_041760.1	90958801	90959400	LOC114679544
NC_041760.1	90900201	90900800	LOC114679544
NC_041760.1	90977401	90977800	LOC114679544
NC_041760.1	164361401	164361800	LOC114679652
NC_041760.1	96652001	96652200	LOC114679864
NC_041760.1	96637401	96637600	LOC114679864
NC_041760.1	96651401	96651800	LOC114679864
NC_041760.1	4062201	4062800	LOC114680033
NC_041761.1	40249401	40249800	LOC114680234
NC_041761.1	40263201	40263600	LOC114680234
NC_041761.1	8142601	8142800	LOC114680387
NC_041767.1	83090201	83090400	LOC693283
NC_041774.1	49376001	49376400	LOC693330
NC_041756.1	133617601	133618200	LOC693802
NC_041756.1	133680401	133681000	LOC693802
NC_041756.1	133612401	133612800	LOC693802
NC_041756.1	133696001	133696400	LOC693802
NC_041756.1	133693001	133693200	LOC693802
NC_041756.1	133605801	133606000	LOC693802
NC_041756.1	133688601	133689000	LOC693802
NC_041767.1	83199801	83200200	LOC693908
NC_041767.1	83220801	83221000	LOC693908
NC_041767.1	83213401	83213800	LOC693908
NW_021161590.1	18601	19000	LOC693973
NW_021161590.1	2601	2800	LOC693973
NC_041771.1	64699601	64700000	LOC694580
NC_041771.1	64696001	64696600	LOC694580
NC_041771.1	64691001	64691400	LOC694580
NC_041756.1	65710001	65710400	LOC694593
NC_041756.1	65677401	65677800	LOC694593
NC_041756.1	65676601	65677000	LOC694593
NC_041772.1	38043201	38043800	LOC694781
NC_041774.1	35533201	35533800	LOC694921
NC_041774.1	35581801	35582000	LOC694921
NC_041774.1	117168801	117169200	LOC696321
NC_041756.1	68577201	68577400	LOC696369
NC_041756.1	68618801	68619200	LOC696369
NC_041756.1	68658001	68658600	LOC696369
NC_041770.1	59113401	59113800	LOC696854
NC_041757.1	88234401	88234800	LOC696921
NC_041757.1	88370601	88370800	LOC696921
NC_041757.1	88253001	88253400	LOC696921
NC_041757.1	88228201	88228800	LOC696921
NC_041757.1	88329801	88330400	LOC696921
NC_041757.1	88323801	88324400	LOC696921
NC_041757.1	88279801	88280000	LOC696921
NC_041761.1	106212601	106213200	LOC696935
NC_041761.1	106225601	106226000	LOC696935
NC_041761.1	106033201	106033400	LOC696935
NC_041761.1	106153401	106153800	LOC696935
NC_041761.1	106176401	106176800	LOC696935
NC_041761.1	106164601	106165000	LOC696935
NC_041761.1	106205801	106206200	LOC696935
NC_041761.1	106142601	106142800	LOC696935
NC_041765.1	60862601	60863000	LOC696959
NC_041765.1	60857401	60857800	LOC696959
NC_041761.1	59185001	59185400	LOC698256
NC_041763.1	89039001	89039400	LOC699185
NC_041773.1	76946001	76946400	LOC699231
NC_041773.1	76974601	76974800	LOC699231
NC_041773.1	76955001	76955400	LOC699231
NC_041758.1	110203601	110204000	LOC700113
NC_041758.1	110201001	110201400	LOC700113
NC_041758.1	110033001	110033600	LOC700113
NC_041758.1	110331401	110332000	LOC700113
NC_041758.1	110116201	110116600	LOC700113
NC_041758.1	110046201	110046400	LOC700113
NC_041758.1	110090001	110090400	LOC700113
NC_041758.1	110136201	110136600	LOC700113
NC_041758.1	110140601	110141200	LOC700113
NC_041758.1	110191801	110192200	LOC700113
NC_041758.1	110049601	110049800	LOC700113
NC_041758.1	110053201	110053800	LOC700113
NC_041758.1	110286401	110286800	LOC700113
NC_041758.1	110108601	110109200	LOC700113
NC_041758.1	110094601	110095200	LOC700113
NC_041758.1	109999601	109999800	LOC700113
NC_041757.1	143078001	143078600	LOC701574
NC_041774.1	55070601	55071000	LOC703127
NC_041756.1	113971801	113972200	LOC703490
NC_041761.1	67587401	67587600	LOC704147
NC_041757.1	142375801	142376000	LOC704341
NC_041756.1	70387001	70387200	LOC705636
NC_041756.1	70361201	70361800	LOC705636
NC_041756.1	70362601	70363000	LOC705636
NC_041762.1	58130401	58130800	LOC706956
NC_041774.1	6166201	6167000	LOC707602
NC_041774.1	6296001	6296400	LOC707602
NC_041761.1	126604201	126604800	LOC707924
NC_041761.1	126592201	126592800	LOC707924
NC_041761.1	126643401	126643600	LOC707924
NC_041767.1	82886001	82886400	LOC708050
NC_041774.1	48122001	48122400	LOC708657
NC_041774.1	48170601	48171200	LOC709052
NC_041772.1	56802801	56803200	LOC709523
NC_041768.1	31263801	31264000	LOC711690
NC_041768.1	31256001	31256400	LOC711690
NC_041768.1	31255401	31255800	LOC711690
NC_041760.1	168260001	168260400	LOC711872
NC_041760.1	168293201	168293600	LOC711872
NC_041767.1	17543401	17544000	LOC712404
NC_041768.1	64503401	64503800	LOC712661
NC_041768.1	64490801	64491200	LOC712661
NC_041768.1	64509201	64509800	LOC712661
NC_041768.1	64505401	64505800	LOC712661
NC_041772.1	36149001	36149400	LOC713295
NC_041756.1	58772801	58773200	LOC715687
NC_041756.1	58756201	58756600	LOC715687
NC_041769.1	31817201	31817800	LOC715706
NC_041773.1	56374601	56375200	LOC715804
NC_041773.1	56373001	56373800	LOC715804
NC_041772.1	47274401	47274800	LOC718020
NC_041759.1	17764201	17764600	LOC718280
NC_041759.1	17798601	17799000	LOC718280
NC_041759.1	17802201	17802800	LOC718280
NC_041759.1	17801201	17801600	LOC718280
NC_041763.1	19319201	19319600	LOC718691
NW_021160161.1	596201	596400	LOC719250
NC_041763.1	27906801	27907200	LOC720294
NC_041763.1	27891601	27891800	LOC720294
NC_041774.1	7825401	7825800	LOC720717
NC_041774.1	7794001	7794600	LOC720717
NC_041770.1	1380201	1380800	LOC721289
NC_041758.1	162454801	162455200	LOC721718
NC_041758.1	162456201	162456800	LOC721718
NC_041772.1	52987801	52988400	LOC722722
NC_041757.1	166983401	166983800	LOC722929
NC_041774.1	147934401	147934800	MAGEA4
NC_041774.1	30058001	30058400	MAGEB2
NC_041774.1	30062801	30063400	MAGEB2
NC_041756.1	91793401	91794200	MALSU1
NC_041756.1	91806001	91806200	MALSU1
NC_041756.1	91827001	91827600	MALSU1
NC_041772.1	48705801	48706800	MAMSTR
NC_041757.1	139393201	139393400	MAMU-E
NC_041757.1	139415001	139415600	MAMU-E
NC_041757.1	139399401	139399800	MAMU-E
NC_041754.1	188439001	188439600	MAP7D1
NC_041754.1	188413401	188415000	MAP7D1
NC_041754.1	188432801	188433200	MAP7D1
NC_041754.1	192331801	192332200	MARCKSL1
NC_041758.1	97300201	97300600	METAP1
NC_041758.1	97294601	97295200	METAP1
NC_041754.1	184634001	184634200	MFSD2A
NC_041754.1	184642201	184642600	MFSD2A
NC_041754.1	184601401	184601800	MFSD2A
NC_041754.1	184588001	184588600	MFSD2A
NC_041754.1	184620601	184621000	MFSD2A
NC_041754.1	184630401	184630800	MFSD2A
NC_041754.1	184643201	184643800	MFSD2A
NC_041769.1	75740801	75741600	MIR7166
NC_041769.1	75708401	75708800	MIR7166
NC_041769.1	75745801	75746000	MIR7166
NC_041769.1	75689001	75689200	MIR7166
NC_041769.1	75737201	75737600	MIR7166
NC_041769.1	75689801	75690400	MIR7166
NC_041760.1	155322201	155322600	MOAP1
NC_041760.1	155320601	155321000	MOAP1
NC_041772.1	1898801	1899400	MOB3A
NC_041756.1	75106601	75107000	MPLKIP
NC_041762.1	78182001	78182200	MRLN
NC_041766.1	150201	150600	MRPS5
NC_041766.1	154601	154800	MRPS5
NC_041766.1	155201	155400	MRPS5
NC_041756.1	114260401	114260800	MTERF1
NC_041761.1	128091001	128091200	MYC
NC_041761.1	128123801	128124400	MYC
NC_041761.1	128114401	128114800	MYC
NC_041761.1	128004401	128004800	MYC
NC_041761.1	127961201	127961600	MYC
NC_041761.1	128047001	128047400	MYC
NC_041761.1	128081201	128081600	MYC
NC_041761.1	25317801	25318000	NEFL
NC_041761.1	25213401	25214000	NEFL
NC_041761.1	25333601	25334200	NEFL
NC_041761.1	25270201	25270600	NEFL
NC_041761.1	25294001	25294400	NEFL
NC_041761.1	25326201	25326800	NEFL
NC_041772.1	3823201	3823600	NMRK2
NC_041772.1	3811401	3811600	NMRK2
NC_041772.1	3836801	3837800	NMRK2
NC_041772.1	3806001	3806400	NMRK2
NC_041772.1	3835601	3836200	NMRK2
NC_041762.1	16330601	16331000	NMT2
NC_041759.1	149867201	149867600	NMUR2
NC_041759.1	149893601	149894000	NMUR2
NC_041759.1	149820201	149820600	NMUR2
NC_041759.1	149973201	149973600	NMUR2
NC_041759.1	149879001	149879200	NMUR2
NC_041759.1	149835401	149835800	NMUR2
NC_041759.1	149826201	149826800	NMUR2
NC_041754.1	223468601	223469000	NOC2L
NC_041754.1	223481801	223482200	NOC2L
NC_041758.1	136838801	136839200	NOCT
NC_041758.1	136832601	136832800	NOCT
NC_041758.1	136851801	136852400	NOCT
NC_041758.1	136898801	136899000	NOCT
NC_041758.1	136908801	136909400	NOCT
NC_041769.1	64063601	64064000	NOL11
NC_041769.1	64049201	64050000	NOL11
NC_041769.1	64029601	64030000	NOL11
NC_041769.1	64027601	64027800	NOL11
NC_041769.1	64037601	64038000	NOL11
NC_041774.1	68268401	68268800	NONO
NC_041758.1	3070601	3071400	NOP14
NC_041772.1	49526001	49526400	NOSIP
NC_041762.1	74855801	74856000	NRBF2
NC_041756.1	155834001	155834400	NRF1
NC_041756.1	155972801	155973200	NRF1
NC_041756.1	155861001	155861400	NRF1
NC_041756.1	155868801	155869200	NRF1
NC_041759.1	174603601	174604000	NSD1
NC_041759.1	174619801	174620200	NSD1
NC_041759.1	174591201	174591400	NSD1
NC_041759.1	174649801	174650200	NSD1
NC_041759.1	174653401	174653600	NSD1
NC_041759.1	174594601	174595000	NSD1
NC_041759.1	174645401	174645800	NSD1
NC_041759.1	174601001	174601400	NSD1
NC_041759.1	174714001	174714200	NSD1
NC_041759.1	174619201	174619600	NSD1
NC_041773.1	27040801	27041400	NUPR1
NC_041774.1	54813401	54814000	PAGE2B
NC_041766.1	4358601	4359000	PDCL3
NC_041766.1	4367801	4368400	PDCL3
NC_041755.1	113713401	113713800	PDE12
NC_041755.1	113716801	113717200	PDE12
NC_041762.1	97882201	97883000	PGAM1
NC_041762.1	97861801	97862400	PGAM1
NC_041767.1	3002601	3003200	PHLDA2
NC_041769.1	47569201	47569600	PHOSPHO1
NC_041769.1	47556401	47556800	PHOSPHO1
NC_041769.1	47566801	47567200	PHOSPHO1
NC_041769.1	47539601	47540000	PHOSPHO1
NC_041757.1	132229201	132229400	PIM1
NC_041757.1	132234601	132235000	PIM1
NC_041757.1	132246401	132246600	PIM1
NC_041769.1	6235001	6235400	PIMREG
NC_041769.1	6265001	6265400	PIMREG
NC_041768.1	11863001	11863400	PKN3
NC_041768.1	11856401	11856600	PKN3
NC_041758.1	50552201	50552600	PLAC8
NC_041758.1	50599801	50600200	PLAC8
NC_041758.1	50522801	50523200	PLAC8
NC_041758.1	50616001	50616200	PLAC8
NC_041760.1	41370201	41370600	PLEKHO2
NC_041760.1	41380201	41380800	PLEKHO2
NC_041760.1	41387201	41387600	PLEKHO2
NC_041760.1	41379201	41379800	PLEKHO2
NC_041760.1	41371201	41371800	PLEKHO2
NC_041760.1	41401001	41401400	PLEKHO2
NC_041760.1	41390601	41390800	PLEKHO2
NC_041760.1	41368401	41369400	PLEKHO2
NC_041760.1	41365201	41365600	PLEKHO2
NC_041760.1	41408401	41409000	PLEKHO2
NC_041759.1	56777401	56777800	PLK2
NC_041759.1	56731201	56731600	PLK2
NC_041759.1	56703201	56703400	PLK2
NC_041759.1	56790801	56791200	PLK2
NC_041759.1	56691001	56691400	PLK2
NC_041759.1	56679001	56679600	PLK2
NC_041774.1	112058801	112059000	PLS3
NC_041766.1	40583401	40584000	PNO1
NC_041766.1	40594201	40594600	PNO1
NC_041757.1	125804601	125805000	POLR1C
NC_041766.1	83827001	83827200	POMC
NC_041766.1	83841201	83841600	POMC
NC_041766.1	83816401	83816600	POMC
NC_041766.1	83834201	83835200	POMC
NC_041762.1	67545801	67546200	PPA1
NC_041772.1	37486401	37486600	PPP1R14A
NC_041772.1	37482001	37482400	PPP1R14A
NC_041761.1	70628601	70628800	PRDM14
NC_041761.1	70653201	70653800	PRDM14
NC_041761.1	70665401	70666000	PRDM14
NC_041761.1	70660201	70660800	PRDM14
NC_041763.1	61789001	61789400	PRNP
NC_041763.1	61772001	61772600	PRNP
NC_041763.1	61778601	61779400	PRNP
NC_041760.1	97291801	97292400	PRORP
NC_041764.1	48912201	48912400	PRPH
NC_041765.1	119117401	119118000	PTMA
NC_041765.1	119116001	119116400	PTMA
NC_041765.1	119122001	119122400	PTMA
NC_041755.1	162144201	162144600	QTRT2
NC_041755.1	162168801	162169000	QTRT2
NC_041755.1	162205601	162206200	QTRT2
NC_041761.1	38381601	38382200	RAB11FIP1
NC_041761.1	38355001	38355600	RAB11FIP1
NC_041761.1	38358601	38359000	RAB11FIP1
NC_041761.1	38371601	38372200	RAB11FIP1
NC_041761.1	38356801	38357000	RAB11FIP1
NC_041755.1	144045201	144045600	RAF1
NC_041755.1	144029401	144029600	RAF1
NC_041773.1	22886801	22887200	RBBP6
NC_041773.1	22926401	22926800	RBBP6
NC_041773.1	22955601	22956000	RBBP6
NC_041773.1	22937201	22937800	RBBP6
NC_041773.1	22948401	22948800	RBBP6
NC_041773.1	22890001	22890200	RBBP6
NC_041773.1	22882001	22882400	RBBP6
NC_041773.1	22923001	22923600	RBBP6
NC_041773.1	22946201	22946600	RBBP6
NC_041764.1	113632201	113632600	RBM19
NC_041764.1	113614801	113615200	RBM19
NC_041764.1	113724401	113724800	RBM19
NC_041764.1	113657801	113658200	RBM19
NC_041764.1	113625401	113625800	RBM19
NC_041764.1	113731601	113732000	RBM19
NC_041764.1	113667801	113668400	RBM19
NC_041764.1	113671201	113671800	RBM19
NC_041767.1	107556601	107557200	RBM7
NC_041767.1	107530401	107531000	RBM7
NC_041767.1	107547001	107547600	RBM7
NC_041774.1	133010201	133010800	RBMX
NC_041754.1	214481801	214482400	RBP7
NC_041754.1	214483001	214483400	RBP7
NC_041754.1	196164401	196164600	RCC1
NC_041758.1	36880201	36880400	RELL1
NC_041758.1	36810001	36810600	RELL1
NC_041758.1	36812001	36812400	RELL1
NC_041758.1	36829801	36830000	RELL1
NC_041758.1	36841801	36842200	RELL1
NC_041758.1	36827801	36828000	RELL1
NC_041758.1	36783201	36783800	RELL1
NC_041758.1	36781801	36782000	RELL1
NC_041758.1	36828201	36828800	RELL1
NC_041758.1	36784001	36784200	RELL1
NC_041763.1	22122201	22122600	RFPL1
NC_041763.1	22123401	22123800	RFPL1
NC_041763.1	22133001	22133400	RFPL1
NC_041774.1	116373001	116373400	RHOXF2
NC_041764.1	11061001	11061600	RIMKLB
NC_041764.1	11015001	11015200	RIMKLB
NC_041764.1	11019201	11019600	RIMKLB
NC_041764.1	112908001	112908600	RITA1
NC_041764.1	112904001	112904400	RITA1
NC_041760.1	108846601	108847000	RPL10L
NC_041755.1	75760801	75761200	RPL22L1
NC_041755.1	75752001	75752400	RPL22L1
NC_041755.1	75750401	75750800	RPL22L1
NC_041757.1	126486801	126487200	RPL7L1
NC_041760.1	52015001	52015400	RPP25
NC_041760.1	51994801	51995800	RPP25
NC_041760.1	52009801	52010200	RPP25
NC_027914.1	114201	114400	RPS4Y1
NC_027914.1	127401	127800	RPS4Y1
NC_027914.1	134401	134600	RPS4Y1
NC_027914.1	126601	127000	RPS4Y1
NC_027914.1	119001	119400	RPS4Y1
NC_027914.1	136601	137000	RPS4Y1
NC_027914.1	139601	140000	RPS4Y1
NC_027914.1	142601	142800	RPS4Y1
NC_027914.1	6045801	6046200	RPS4Y2
NC_041760.1	17007201	17007600	RPUSD2
NC_041760.1	17013401	17013800	RPUSD2
NC_041762.1	97829801	97830200	RRP12
NC_041762.1	97851001	97851600	RRP12
NC_041754.1	99080001	99080200	S100A10
NC_041754.1	99090001	99091000	S100A10
NC_041754.1	99077001	99077800	S100A10
NC_041754.1	99942201	99942600	SCNM1
NC_041773.1	27838001	27838400	SEPHS2
NC_041773.1	27856201	27856800	SEPHS2
NC_041754.1	193258401	193259000	SERINC2
NC_041754.1	193218401	193218800	SERINC2
NC_041754.1	193251001	193251400	SERINC2
NC_041754.1	196470001	196470400	SESN2
NC_041754.1	196468601	196469000	SESN2
NC_041754.1	196430801	196431200	SESN2
NC_041773.1	27477201	27477600	SEZ6L2
NC_041754.1	197907201	197907600	SFN
NC_041754.1	197900401	197900600	SFN
NC_041754.1	197890001	197890200	SFN
NC_041757.1	37731601	37732000	SGK1
NC_041763.1	60735001	60735400	SHLD1
NC_041763.1	60735801	60736200	SHLD1
NC_041763.1	60721201	60721400	SHLD1
NC_041763.1	60724801	60725400	SHLD1
NC_041772.1	14582401	14582800	SLC1A6
NC_041772.1	14553601	14554200	SLC1A6
NC_041772.1	14563201	14563600	SLC1A6
NC_041772.1	14556801	14557200	SLC1A6
NC_041772.1	14575801	14576200	SLC1A6
NC_041764.1	11543801	11544800	SLC2A3
NC_041769.1	7054601	7055200	SLC2A4
NC_041769.1	7043801	7044400	SLC2A4
NC_041769.1	7047601	7048000	SLC2A4
NC_041758.1	24598201	24598400	SLC34A2
NC_041758.1	24604601	24604800	SLC34A2
NC_041766.1	81747401	81747800	SLC5A6
NC_041773.1	74859401	74859600	SLC7A5
NC_041773.1	74916201	74916600	SLC7A5
NC_041773.1	74836401	74836600	SLC7A5
NC_041773.1	74874601	74875200	SLC7A5
NC_041773.1	74867801	74868200	SLC7A5
NC_041773.1	74885201	74885600	SLC7A5
NC_041773.1	74878201	74878600	SLC7A5
NC_041773.1	74876801	74877200	SLC7A5
NC_041773.1	74856601	74857200	SLC7A5
NC_041773.1	74923801	74924200	SLC7A5
NC_041773.1	74853001	74853400	SLC7A5
NC_041773.1	74884401	74885000	SLC7A5
NC_041773.1	74840401	74840800	SLC7A5
NC_041772.1	47462601	47463200	SLC8A2
NC_041772.1	47506401	47507000	SLC8A2
NC_041764.1	12593601	12593800	SMIM10L1
NC_041763.1	85251401	85251800	SNAI1
NC_041763.1	85218801	85219200	SNAI1
NC_041763.1	85236001	85236400	SNAI1
NC_041763.1	85221401	85222000	SNAI1
NC_041763.1	85261601	85261800	SNAI1
NC_041763.1	85224601	85225200	SNAI1
NC_041763.1	85210801	85211200	SNAI1
NC_041763.1	85217201	85217600	SNAI1
NC_041763.1	85214601	85215000	SNAI1
NC_041763.1	85212801	85213200	SNAI1
NC_041763.1	85200601	85200800	SNAI1
NC_041763.1	85249801	85250200	SNAI1
NC_041763.1	85244201	85244800	SNAI1
NC_041763.1	85210001	85210400	SNAI1
NC_041763.1	64068801	64069400	SNRPB
NC_041763.1	64022001	64022200	SNRPB
NC_041760.1	52758601	52759000	SNUPN
NC_041757.1	148421601	148422200	SOX4
NC_041757.1	148427001	148427600	SOX4
NC_041757.1	148410201	148410800	SOX4
NC_041763.1	70852201	70852600	SPAG4
NC_041763.1	70853601	70854000	SPAG4
NC_041763.1	70844801	70846000	SPAG4
NC_041763.1	70848601	70849000	SPAG4
NC_041769.1	72808001	72808600	SPHK1
NC_041769.1	72788601	72789000	SPHK1
NC_041767.1	46889201	46890000	SPTY2D1
NC_041757.1	132869601	132870000	SRSF3
NC_041762.1	18802201	18802400	STAM
NC_041762.1	18809401	18809800	STAM
NC_041760.1	114834001	114834400	STYX
NC_041760.1	114864801	114865200	STYX
NC_041760.1	114854201	114854400	STYX
NC_041768.1	4941601	4942000	SURF6
NC_041757.1	134629201	134629600	TAF11
NC_041756.1	70100001	70100400	TBRG4
NC_041756.1	70106201	70106600	TBRG4
NC_041756.1	70087001	70087400	TBRG4
NC_041761.1	54668601	54669200	TCEA1
NC_041761.1	54653801	54654200	TCEA1
NC_041761.1	54638801	54639200	TCEA1
NC_041774.1	99929801	99930200	TCEAL9
NC_041769.1	78702001	78702400	TEX19
NC_041762.1	79616401	79616600	TFAM
NC_041762.1	79625801	79626200	TFAM
NC_041761.1	56397401	56398000	TGS1
NC_041761.1	56442601	56442800	TGS1
NC_041761.1	56453001	56453600	TGS1
NC_041761.1	56439801	56440200	TGS1
NC_041758.1	77035401	77035800	THEGL
NC_041758.1	77053601	77054200	THEGL
NC_041763.1	22002601	22003400	THOC5
NC_041774.1	98177801	98178200	TIMM8A
NC_041774.1	150232801	150233000	TKTL1
NC_041754.1	131020401	131021000	TMED5
NC_041754.1	131001801	131002200	TMED5
NC_041754.1	131018201	131018600	TMED5
NC_041766.1	23563801	23564200	TMSB10
NC_041772.1	4558601	4559200	TNFAIP8L1
NC_041768.1	10712201	10712600	TOR1B
NC_041768.1	10734001	10734400	TOR1B
NC_041768.1	48518201	48519000	TPM2
NC_041768.1	48499601	48500000	TPM2
NC_041768.1	48502001	48502400	TPM2
NC_041769.1	24386401	24386800	TRAF4
NC_041769.1	24379601	24380000	TRAF4
NC_041769.1	24401201	24401400	TRAF4
NC_041769.1	24391201	24391600	TRAF4
NC_041769.1	24387201	24387600	TRAF4
NC_041769.1	24402001	24402400	TRAF4
NC_041769.1	24368801	24369200	TRAF4
NC_041768.1	44760601	44761400	TRIM14
NC_041768.1	44771801	44772400	TRIM14
NC_041768.1	44818001	44818400	TRIM14
NC_041768.1	44787401	44787600	TRIM14
NC_041768.1	44790801	44791200	TRIM14
NC_041759.1	178807401	178807800	TRIM52
NC_041756.1	29398401	29398800	TRNAG-GCC_9
NC_041756.1	29411201	29411600	TRNAG-GCC_9
NC_041756.1	29409001	29409600	TRNAG-GCC_9
NC_041757.1	142078401	142078800	TRNAS-GCU_1
NC_041757.1	142070201	142070800	TRNAS-GCU_1
NC_041757.1	142077401	142077600	TRNAS-GCU_1
NC_041757.1	142087801	142088200	TRNAS-GCU_1
NC_041763.1	8328801	8329400	TSPO
NC_041766.1	76314601	76315000	TTC27
NC_041766.1	76280801	76281400	TTC27
NC_041766.1	76285201	76285600	TTC27
NC_041766.1	76286001	76286400	TTC27
NC_041766.1	76320401	76320600	TTC27
NC_041766.1	76245801	76246200	TTC27
NC_041766.1	76231201	76231600	TTC27
NC_041766.1	76255401	76255800	TTC27
NC_041766.1	76238001	76238600	TTC27
NC_041754.1	223236201	223236600	TTLL10
NC_041757.1	139181801	139182200	TUBB
NC_041772.1	6446201	6446600	TUBB4A
NC_041772.1	6439401	6440200	TUBB4A
NC_041768.1	970401	970800	TUBB4B
NC_041771.1	73022201	73022600	TUBB6
NC_041771.1	73016401	73017000	TUBB6
NC_041771.1	72988001	72988200	TUBB6
NC_041772.1	35330201	35330600	TYROBP
NC_041755.1	1148401	1148800	UBXN7
NC_041755.1	1150601	1151200	UBXN7
NC_041767.1	67026401	67027000	UCP2
NC_041767.1	67028601	67028800	UCP2
NC_041763.1	33852801	33853200	USP18
NC_041754.1	67354801	67355600	UTP25
NC_041754.1	67375201	67375400	UTP25
NC_041769.1	28151401	28151800	UTP6
NC_041769.1	28152801	28153000	UTP6
NC_041769.1	28159801	28160200	UTP6
NC_041769.1	4613801	4614200	VMO1
NC_041754.1	106300001	106300600	WDR3
NC_041754.1	106230801	106231200	WDR3
NC_041774.1	49070001	49070400	WDR45
NC_041759.1	138048601	138049000	WDR55
NC_041769.1	22921401	22922000	WSB1
NC_041754.1	192107001	192107400	ZBTB8A
NC_041754.1	192107601	192108000	ZBTB8A
NC_041754.1	192135801	192136600	ZBTB8A
NC_041754.1	192129201	192129600	ZBTB8A
NC_041754.1	192115201	192115600	ZBTB8A
NC_041754.1	192141601	192142200	ZBTB8A
NC_041754.1	192016801	192017400	ZBTB8OS
NC_041760.1	130915201	130916000	ZFP36L1
NC_041760.1	130905401	130905800	ZFP36L1
NC_041760.1	130916401	130917000	ZFP36L1
NC_041758.1	185304201	185304800	ZFP42
NC_041758.1	185283201	185283600	ZFP42
NC_041758.1	185238201	185238600	ZFP42
NC_041760.1	135148001	135148600	ZFYVE1
NC_041772.1	56784201	56784600	ZIM3
NC_041772.1	56769801	56770200	ZIM3
NC_041772.1	9367201	9367600	ZNF121
NC_041772.1	9372601	9373200	ZNF121
NC_041763.1	88745001	88745400	ZNF217
NC_041763.1	88795201	88795400	ZNF217
NC_041763.1	88757801	88758200	ZNF217
NC_041763.1	88751401	88751800	ZNF217
NC_041763.1	88769201	88769600	ZNF217
NC_041763.1	88803401	88803800	ZNF217
NC_041763.1	88633201	88633800	ZNF217
NC_041763.1	88816601	88816800	ZNF217
NC_041763.1	88796001	88796400	ZNF217
NC_041763.1	88756001	88756200	ZNF217
NC_041763.1	88741201	88741800	ZNF217
NC_041763.1	88650001	88650400	ZNF217
NC_041763.1	88605001	88605600	ZNF217
NC_041763.1	88620801	88621200	ZNF217
NC_041763.1	88608001	88608400	ZNF217
NC_041763.1	88623001	88623400	ZNF217
NC_041763.1	88727401	88727800	ZNF217
NC_041763.1	88679601	88680000	ZNF217
NC_041763.1	88646801	88647000	ZNF217
NC_041755.1	104264601	104265200	ZNF589
NC_041755.1	104280201	104280800	ZNF589
NC_041772.1	11752401	11752800	ZNF878
NC_041772.1	11755801	11756400	ZNF878
NC_041772.1	11756601	11757000	ZNF878
NC_041754.1	138658201	138658800	ZNHIT6
NC_041754.1	138598801	138599200	ZNHIT6
NC_041754.1	138694601	138694800	ZNHIT6
NC_041754.1	138682001	138682400	ZNHIT6
NC_041754.1	138707201	138707400	ZNHIT6
NC_041754.1	138700601	138701000	ZNHIT6
NC_041754.1	138656801	138657600	ZNHIT6
NC_041754.1	138739201	138739600	ZNHIT6
NC_041754.1	138749601	138750000	ZNHIT6
NC_041772.1	56021801	56022400	ZSCAN5A
NC_041754.1	171564601	171565000	ZYG11A

## Sheet: Peak-linked morula genes in O8C
Distal differential peaks linked to activated morula genes in O8C					List of differential-peak-associated activated morula genes
Seqname	Start	End	Gene symbol		Gene symbol
NC_041763.1	41216401	41217000	ABHD12		ABHD12
NC_041763.1	41318801	41319200	ABHD12		ABITRAM
NC_041763.1	41222201	41222600	ABHD12		ACAA2
NC_041763.1	41282001	41282600	ABHD12		ACAD9
NC_041763.1	41263801	41264000	ABHD12		ACBD6
NC_041763.1	41239801	41240200	ABHD12		ACTN1
NC_041763.1	41321601	41322000	ABHD12		ADAP2
NC_041763.1	41258001	41258600	ABHD12		ADCK5
NC_041763.1	41217601	41218000	ABHD12		AFTPH
NC_041768.1	33953601	33954000	ABITRAM		AIMP1
NC_041768.1	33955401	33955800	ABITRAM		AK4
NC_041768.1	33958801	33959200	ABITRAM		ALG6
NC_041771.1	32647001	32647400	ACAA2		APEH
NC_041771.1	32684001	32684400	ACAA2		APRT
NC_041755.1	147625401	147626200	ACAD9		ARNT
NC_041755.1	147627001	147627600	ACAD9		ARPC1A
NC_041755.1	147590601	147591000	ACAD9		ARPC1B
NC_041755.1	147593001	147593400	ACAD9		ARPC2
NC_041754.1	37666401	37666600	ACBD6		ASNSD1
NC_041754.1	37676801	37677000	ACBD6		ATG10
NC_041760.1	131103201	131103600	ACTN1		ATP5MF
NC_041760.1	131105001	131105800	ACTN1		ATP6V1A
NC_041760.1	131092201	131092600	ACTN1		ATXN10
NC_041760.1	131120401	131121000	ACTN1		AUH
NC_041769.1	28465001	28465400	ADAP2		BNIP3
NC_041761.1	144666601	144667000	ADCK5		BOLA3
NC_041766.1	44257201	44257800	AFTPH		BROX
NC_041766.1	44253001	44253400	AFTPH		C3H7orf50
NC_041758.1	104765401	104766000	AIMP1		CA13
NC_041758.1	104775001	104775400	AIMP1		CAB39L
NC_041754.1	159280801	159281400	AK4		CAPZA2
NC_041754.1	159300401	159300600	AK4		CASP6
NC_041754.1	161058401	161058800	ALG6		CCAR2
NC_041754.1	161029001	161029400	ALG6		CCN2
NC_041754.1	161076401	161076800	ALG6		CCNC
NC_041754.1	161062201	161062400	ALG6		CCND3
NC_041755.1	105795201	105795600	APEH		CCPG1
NC_041773.1	75842001	75842400	APRT		CD300LG
NC_041754.1	100265401	100266000	ARNT		CDK5RAP2
NC_041754.1	100245401	100245800	ARNT		CFAP410
NC_041754.1	100288001	100288600	ARNT		CHORDC1
NC_041754.1	100240401	100240800	ARNT		CKB
NC_041756.1	41452201	41452800	ARPC1A		COMT
NC_041756.1	41458801	41459200	ARPC1A		CSE1L
NC_041756.1	41478401	41478600	ARPC1B		CTSH
NC_041765.1	105628801	105629400	ARPC2		CTSV
NC_041765.1	76830601	76830800	ASNSD1		CUL4A
NC_041765.1	76806601	76806800	ASNSD1		DARS2
NC_041759.1	78649201	78649600	ATG10		DHRS7B
NC_041759.1	78643401	78643800	ATG10		DHX30
NC_041759.1	78638601	78638800	ATG10		DIAPH1
NC_041759.1	78805801	78806200	ATG10		DNAJC3
NC_041759.1	78824201	78824400	ATG10		DNMT3L
NC_041759.1	78641201	78641400	ATG10		DPP4
NC_041759.1	78729401	78729800	ATG10		DPPA2
NC_041759.1	78730801	78731400	ATG10		DRG2
NC_041756.1	41570601	41571000	ATP5MF		DTYMK
NC_041755.1	162474601	162475000	ATP6V1A		DUS3L
NC_041755.1	162501601	162502000	ATP6V1A		DUSP11
NC_041763.1	5844001	5844400	ATXN10		EED
NC_041763.1	5738201	5738600	ATXN10		EIF1AY
NC_041763.1	5847801	5848400	ATXN10		EIF2S1
NC_041763.1	5866801	5867400	ATXN10		EIF3E
NC_041763.1	5832001	5832400	ATXN10		ELOVL7
NC_041763.1	5852601	5852800	ATXN10		ENPP4
NC_041763.1	5864001	5864200	ATXN10		EPCAM
NC_041768.1	106328201	106328600	AUH		ERMARD
NC_041768.1	106324601	106325200	AUH		F2RL1
NC_041768.1	106332401	106332800	AUH		FADD
NC_041768.1	106356201	106356600	AUH		FAH
NC_041762.1	132435201	132435400	BNIP3		FAM3B
NC_041762.1	132465401	132466000	BNIP3		FAM50A
NC_041762.1	132460601	132460800	BNIP3		FASTKD2
NC_041762.1	132436801	132437400	BNIP3		FITM2
NC_041762.1	132463401	132463600	BNIP3		FKBP5
NC_041766.1	34738001	34738200	BOLA3		FMO5
NC_041766.1	34705001	34705200	BOLA3		GALM
NC_041766.1	34689201	34689400	BOLA3		GATA6
NC_041754.1	80348601	80349000	BROX		GATB
NC_041756.1	34184601	34185200	C3H7orf50		GLRX2
NC_041761.1	85795601	85795800	CA13		GMPPB
NC_041761.1	85795001	85795200	CA13		GNPNAT1
NC_041761.1	85780401	85781000	CA13		GSS
NC_041770.1	27894201	27894600	CAB39L		GTF2H5
NC_041770.1	27863601	27864200	CAB39L		GYG2
NC_041770.1	27883001	27883400	CAB39L		HADHB
NC_041756.1	143012201	143012400	CAPZA2		HAT1
NC_041756.1	143073601	143074000	CAPZA2		HAVCR1
NC_041758.1	108032801	108033200	CASP6		HDDC2
NC_041758.1	108021401	108022000	CASP6		HEXA
NC_041761.1	22798201	22798800	CCAR2		HK1
NC_041761.1	22802801	22803200	CCAR2		HK2
NC_041757.1	35498001	35498800	CCN2		HMBS
NC_041757.1	35456001	35456400	CCN2		HSD17B10
NC_041757.1	73738001	73738400	CCNC		HSPA9
NC_041757.1	73742401	73742800	CCNC		HSPD1
NC_041757.1	73734401	73734800	CCNC		IGF2BP1
NC_041757.1	127335201	127335600	CCND3		ILK
NC_041757.1	127432601	127432800	CCND3		IMMP2L
NC_041757.1	127413001	127413200	CCND3		IMPDH2
NC_041757.1	127332001	127332400	CCND3		INTS13
NC_041757.1	127435601	127436200	CCND3		IPO5
NC_041760.1	31729801	31730200	CCPG1		IPO7
NC_041769.1	55119201	55119600	CD300LG		ITGB7
NC_041768.1	22163001	22163400	CDK5RAP2		KCTD6
NC_041768.1	22149001	22149400	CDK5RAP2		LAMP1
NC_041768.1	22204801	22205400	CDK5RAP2		LATS1
NC_041768.1	22239601	22240200	CDK5RAP2		LBR
NC_041768.1	22199401	22199800	CDK5RAP2		LDHA
NC_041768.1	22177601	22178000	CDK5RAP2		LDHB
NC_041768.1	22189201	22189600	CDK5RAP2		LETM1
NC_041756.1	2406001	2406800	CFAP410		LIPH
NC_041767.1	83337201	83337600	CHORDC1		LMAN2
NC_041767.1	83411401	83411800	CHORDC1		LMNA
NC_041767.1	83604601	83604800	CHORDC1		LOC100423423
NC_041767.1	83571001	83571400	CHORDC1		LOC100425407
NC_041767.1	83578201	83578800	CHORDC1		LOC100426639
NC_041767.1	83392601	83393000	CHORDC1		LOC100429260
NC_041767.1	83851801	83852200	CHORDC1		LOC100429752
NC_041767.1	83715801	83716000	CHORDC1		LOC100430373
NC_041767.1	83325801	83326200	CHORDC1		LOC106993989
NC_041767.1	83738001	83738200	CHORDC1		LOC106994675
NC_041767.1	83756401	83756800	CHORDC1		LOC106994967
NC_041760.1	165811001	165812000	CKB		LOC106995967
NC_041760.1	165802801	165803200	CKB		LOC106996044
NC_041760.1	165819801	165820400	CKB		LOC106996374
NC_041760.1	165795601	165796000	CKB		LOC114669721
NC_041760.1	165818401	165819000	CKB		LOC114670433
NC_041760.1	165799001	165799600	CKB		LOC114671351
NC_041763.1	32715401	32716000	COMT		LOC114672050
NC_041763.1	32681601	32683000	COMT		LOC114672190
NC_041763.1	32714001	32714600	COMT		LOC114674310
NC_041763.1	32672801	32673200	COMT		LOC114674455
NC_041763.1	32717401	32717800	COMT		LOC114675364
NC_041763.1	84275401	84275800	CSE1L		LOC114675515
NC_041763.1	84220401	84221000	CSE1L		LOC114677044
NC_041763.1	84290201	84290800	CSE1L		LOC114677350
NC_041763.1	84211201	84211600	CSE1L		LOC114677470
NC_041763.1	84285201	84285600	CSE1L		LOC693330
NC_041763.1	84276801	84277400	CSE1L		LOC693802
NC_041763.1	84202201	84202600	CSE1L		LOC694706
NC_041763.1	84218401	84218600	CSE1L		LOC696151
NC_041763.1	84224801	84225400	CSE1L		LOC696504
NC_041760.1	56262401	56262600	CTSH		LOC696854
NC_041760.1	56293801	56294400	CTSH		LOC696935
NC_041760.1	56238801	56239200	CTSH		LOC696959
NC_041768.1	110990201	110990600	CTSV		LOC698520
NC_041768.1	110957201	110957400	CTSV		LOC698792
NC_041770.1	94480201	94480600	CUL4A		LOC700233
NC_041770.1	94449401	94449600	CUL4A		LOC701223
NC_041754.1	31129601	31130000	DARS2		LOC701494
NC_041769.1	20339801	20340400	DHRS7B		LOC701691
NC_041769.1	20267201	20267600	DHRS7B		LOC702606
NC_041769.1	20278201	20278600	DHRS7B		LOC703127
NC_041755.1	103808601	103809000	DHX30		LOC703919
NC_041755.1	103829201	103830200	DHX30		LOC703968
NC_041759.1	138940201	138940600	DIAPH1		LOC705465
NC_041759.1	138929401	138930000	DIAPH1		LOC705546
NC_041759.1	138923401	138923600	DIAPH1		LOC707358
NC_041759.1	138953401	138953800	DIAPH1		LOC709045
NC_041770.1	77478001	77478400	DNAJC3		LOC711043
NC_041770.1	77470801	77471200	DNAJC3		LOC712614
NC_041756.1	2460601	2461000	DNMT3L		LOC712661
NC_041756.1	2459801	2460200	DNMT3L		LOC712840
NC_041765.1	49119801	49120000	DPP4		LOC713695
NC_041765.1	49138801	49139600	DPP4		LOC713714
NC_041765.1	48980601	48981000	DPP4		LOC713984
NC_041765.1	49064401	49064800	DPP4		LOC714656
NC_041765.1	49129201	49129600	DPP4		LOC715855
NC_041765.1	49135801	49136000	DPP4		LOC717842
NC_041765.1	49097001	49097600	DPP4		LOC720244
NC_041765.1	49032601	49032800	DPP4		LOXL2
NC_041765.1	49110601	49111000	DPP4		LRIF1
NC_041765.1	49056001	49056600	DPP4		LRPAP1
NC_041765.1	49118601	49119000	DPP4		LRPPRC
NC_041765.1	49094801	49095200	DPP4		LSM5
NC_041755.1	166911801	166912200	DPPA2		M6PR
NC_041755.1	166861201	166861600	DPPA2		MAPRE1
NC_041755.1	166879401	166879800	DPPA2		MDH2
NC_041769.1	17906601	17907000	DRG2		MECR
NC_041769.1	17911001	17911200	DRG2		MED24
NC_041765.1	129094001	129094400	DTYMK		MKI67
NC_041772.1	5715201	5715600	DUS3L		MKKS
NC_041766.1	35062801	35063200	DUSP11		MRM1
NC_041767.1	79498001	79498400	EED		MRPL1
NC_027914.1	5875201	5875800	EIF1AY		MRPL28
NC_041760.1	129498401	129498800	EIF2S1		MRPL32
NC_041760.1	129497601	129498200	EIF2S1		MRPL33
NC_041761.1	108429001	108429600	EIF3E		MRPL38
NC_041761.1	108432601	108433000	EIF3E		MRPL45
NC_041761.1	108388201	108388400	EIF3E		MRPS15
NC_041761.1	108498201	108498800	EIF3E		MRPS17
NC_041761.1	108427201	108427600	EIF3E		MRPS25
NC_041761.1	108412401	108412600	EIF3E		MRPS27
NC_041761.1	108435801	108436000	EIF3E		MRPS30
NC_041761.1	108496401	108496600	EIF3E		MRPS5
NC_041759.1	59200601	59201200	ELOVL7		MRRF
NC_041757.1	123297401	123297800	ENPP4		MTCH2
NC_041757.1	123233001	123233400	ENPP4		MTFP1
NC_041766.1	61424201	61424600	EPCAM		MTG1
NC_041766.1	61440001	61440200	EPCAM		MTHFD1
NC_041757.1	874201	874800	ERMARD		MTX2
NC_041759.1	73698401	73699000	F2RL1		MYDGF
NC_041759.1	73646001	73646600	F2RL1		N6AMT1
NC_041759.1	73676201	73676600	F2RL1		NAA25
NC_041759.1	73687001	73687600	F2RL1		NANOG
NC_041767.1	4612601	4613200	FADD		NDUFA9
NC_041767.1	4578401	4578800	FADD		NDUFB3
NC_041767.1	4591601	4592000	FADD		NDUFB7
NC_041767.1	4581401	4582000	FADD		NDUFC2
NC_041760.1	57472001	57472200	FAH		NDUFV1
NC_041760.1	57442001	57442600	FAH		NIPSNAP2
NC_041756.1	5400801	5401200	FAM3B		NIT1
NC_041756.1	5364201	5364600	FAM3B		NLRP7
NC_041774.1	150372601	150373200	FAM50A		NMI
NC_041765.1	94191201	94191400	FASTKD2		NOC4L
NC_041765.1	94227601	94228000	FASTKD2		NOTO
NC_041763.1	79577201	79577600	FITM2		NUDT1
NC_041757.1	133775601	133775800	FKBP5		NUDT16L1
NC_041754.1	102858201	102858600	FMO5		NUDT5
NC_041754.1	102877401	102878200	FMO5		NUP107
NC_041754.1	102916201	102916400	FMO5		OAT
NC_041766.1	70235201	70235600	GALM		OLA1
NC_041771.1	60231401	60231800	GATA6		OXSM
NC_041758.1	149437201	149437600	GATB		PAGE2B
NC_041758.1	149444201	149444600	GATB		PCBD2
NC_041758.1	149347401	149347800	GATB		PCED1B
NC_041758.1	149400201	149400600	GATB		PCLAF
NC_041758.1	149367401	149367600	GATB		PDCD2L
NC_041758.1	149452401	149452600	GATB		PDHB
NC_041758.1	149324401	149324800	GATB		PDS5B
NC_041758.1	149458001	149458400	GATB		PET117
NC_041758.1	149341001	149341400	GATB		PIGV
NC_041758.1	149343001	149343400	GATB		PMPCB
NC_041758.1	149368401	149368800	GATB		PNPT1
NC_041758.1	149456801	149457200	GATB		POLE2
NC_041758.1	149328801	149329400	GATB		POLR2I
NC_041758.1	149381801	149382000	GATB		POLRMT
NC_041758.1	149453801	149454200	GATB		POMK
NC_041758.1	149316401	149317200	GATB		PPP1R14A
NC_041754.1	50396801	50397200	GLRX2		PPP2CB
NC_041754.1	50420201	50420600	GLRX2		PPP2R5A
NC_041755.1	105845601	105846000	GMPPB		PPP5C
NC_041760.1	114934001	114934200	GNPNAT1		PPT1
NC_041760.1	114944601	114945000	GNPNAT1		PRKDC
NC_041760.1	114949201	114949600	GNPNAT1		PRMT3
NC_041763.1	70125001	70125400	GSS		PRXL2A
NC_041763.1	70143201	70143600	GSS		PSMA1
NC_041763.1	70135601	70136000	GSS		PSMB7
NC_041757.1	64528201	64528400	GTF2H5		PSMC1
NC_041774.1	2377001	2377400	GYG2		PSMD14
NC_041774.1	2428001	2428400	GYG2		PSME4
NC_041774.1	2462001	2462200	GYG2		RAB3IP
NC_041774.1	2377801	2378400	GYG2		RBM44
NC_041766.1	82741201	82741600	HADHB		REXO4
NC_041765.1	59050601	59051000	HAT1		RNF121
NC_041765.1	59046401	59046600	HAT1		RPL22L1
NC_041759.1	154437001	154437400	HAVCR1		RPL26L1
NC_041759.1	154475401	154475800	HAVCR1		RPN2
NC_041759.1	154434201	154434600	HAVCR1		RPS4Y1
NC_041759.1	154429801	154430200	HAVCR1		RPS4Y2
NC_041757.1	28997001	28997800	HDDC2		RREB1
NC_041757.1	28945401	28945600	HDDC2		SDHAF2
NC_041757.1	28859801	28860200	HDDC2		SDHD
NC_041757.1	28895201	28896200	HDDC2		SEC11C
NC_041757.1	28798801	28799600	HDDC2		SEPHS1
NC_041757.1	29052001	29052400	HDDC2		SHLD2
NC_041757.1	28902201	28902600	HDDC2		SHMT1
NC_041757.1	28845001	28845400	HDDC2		SLC18B1
NC_041757.1	28802201	28802600	HDDC2		SLC23A2
NC_041760.1	49120201	49120600	HEXA		SLC25A3
NC_041760.1	49099601	49100000	HEXA		SLC27A4
NC_041762.1	68552401	68552600	HK1		SLC35B1
NC_041762.1	68491001	68491400	HK1		SLC35B3
NC_041762.1	68449201	68449400	HK1		SLC41A2
NC_041762.1	68472601	68473000	HK1		SLC6A8
NC_041766.1	33942801	33943800	HK2		SLCO4C1
NC_041766.1	33980001	33980400	HK2		SLIRP
NC_041766.1	34007601	34008200	HK2		SLTM
NC_041766.1	33981201	33981400	HK2		SMARCAD1
NC_041767.1	112144001	112144600	HMBS		SMCO4
NC_041774.1	53189001	53189600	HSD17B10		SMIM20
NC_041774.1	53188201	53188600	HSD17B10		SNX18
NC_041774.1	53186801	53187200	HSD17B10		SOX2
NC_041759.1	136006601	136007000	HSPA9		SPG21
NC_041759.1	135997601	135998000	HSPA9		SPIC
NC_041765.1	84606201	84607000	HSPD1		SPTLC2
NC_041769.1	47805201	47805600	IGF2BP1		SRM
NC_041767.1	59332601	59333200	ILK		ST3GAL6
NC_041756.1	137777801	137778400	IMMP2L		STOM
NC_041756.1	137803601	137803800	IMMP2L		SUMO3
NC_041756.1	137863201	137863600	IMMP2L		SUZ12
NC_041756.1	137820401	137820800	IMMP2L		TACO1
NC_041756.1	137813201	137813400	IMMP2L		TARS2
NC_041755.1	105128001	105128400	IMPDH2		TATDN1
NC_041755.1	105112801	105113200	IMPDH2		TEAD4
NC_041764.1	28209801	28210200	INTS13		TFAM
NC_041764.1	28212401	28212600	INTS13		TFB1M
NC_041764.1	28210801	28211200	INTS13		TIMM8B
NC_041770.1	79715001	79715600	IPO5		TMED3
NC_041770.1	79778001	79778400	IPO5		TMEM126A
NC_041770.1	79733201	79733800	IPO5		TMEM14B
NC_041770.1	79761401	79761600	IPO5		TMEM165
NC_041770.1	79750601	79751400	IPO5		TMEM37
NC_041770.1	79732201	79732600	IPO5		TMEM45A
NC_041770.1	79705801	79706200	IPO5		TOP1MT
NC_041767.1	56323001	56323600	IPO7		TPR
NC_041767.1	56277801	56278200	IPO7		TPST2
NC_041764.1	52755001	52755200	ITGB7		TRIM32
NC_041755.1	114671401	114671600	KCTD6		TSPAN14
NC_041755.1	114672601	114673000	KCTD6		TSTA3
NC_041755.1	114669201	114669800	KCTD6		TUBB
NC_041770.1	94573401	94574000	LAMP1		TUBB4A
NC_041757.1	55662801	55663200	LATS1		UBAC1
NC_041757.1	55693001	55693400	LATS1		UBE3C
NC_041757.1	55668201	55668800	LATS1		UBQLN4
NC_041757.1	55677001	55677400	LATS1		UQCR
NC_041757.1	55696801	55697200	LATS1		URGCP
NC_041754.1	82871801	82872200	LBR		URI1
NC_041754.1	82875801	82876000	LBR		UTP15
NC_041754.1	82742001	82742400	LBR		VDAC2
NC_041754.1	82890201	82890400	LBR		VPS28
NC_041754.1	82911201	82911400	LBR		VPS39
NC_041754.1	83011601	83012000	LBR		WDR12
NC_041754.1	82983401	82983600	LBR		WDR18
NC_041754.1	82701201	82701600	LBR		WDR4
NC_041767.1	47196001	47196400	LDHA		WDR6
NC_041764.1	23049801	23050400	LDHB		WDR73
NC_041764.1	23025201	23025600	LDHB		WWTR1
NC_041764.1	23043201	23043600	LDHB		XPNPEP1
NC_041764.1	23050601	23051400	LDHB		YARS
NC_041764.1	23024601	23025000	LDHB		YIF1A
NC_041764.1	23044801	23045200	LDHB		ZFAND2B
NC_041764.1	23025801	23026000	LDHB		ZFYVE27
NC_041764.1	23057201	23057800	LDHB		ZMYM1
NC_041758.1	1902401	1903200	LETM1		ZMYND8
NC_041758.1	1908601	1909000	LETM1		ZNF140
NC_041755.1	90876201	90876800	LIPH		ZNF326
NC_041759.1	174830401	174830800	LMAN2		ZPR1
NC_041754.1	94848401	94848800	LMNA
NC_041754.1	94868001	94868400	LMNA
NC_041767.1	56034801	56035200	LOC100423423
NC_041755.1	108121801	108122600	LOC100425407
NC_041754.1	184457201	184457800	LOC100426639
NC_041754.1	184455801	184456800	LOC100426639
NC_041770.1	27650201	27650600	LOC100429260
NC_041765.1	110849401	110850000	LOC100429752
NC_041765.1	110920201	110920600	LOC100429752
NC_041765.1	110850401	110850800	LOC100429752
NC_041765.1	110740401	110741000	LOC100429752
NC_041765.1	110840201	110840400	LOC100429752
NC_041765.1	110738201	110738600	LOC100429752
NC_041765.1	110843401	110844200	LOC100429752
NC_041765.1	110772601	110772800	LOC100429752
NC_041771.1	55079201	55079600	LOC100430373
NC_041771.1	55058001	55058200	LOC100430373
NC_041771.1	55081001	55081400	LOC100430373
NC_041769.1	40601401	40601800	LOC106993989
NC_041769.1	40772201	40772600	LOC106993989
NC_041769.1	40640001	40640200	LOC106993989
NC_041772.1	20226801	20227200	LOC106994675
NC_041772.1	20222001	20222400	LOC106994675
NC_041772.1	20250201	20250600	LOC106994675
NC_041773.1	14944001	14944400	LOC106994967
NC_041773.1	14960601	14961000	LOC106994967
NC_041761.1	114723201	114723600	LOC106995967
NC_041761.1	114691001	114691400	LOC106995967
NC_041774.1	52321601	52322200	LOC106996044
NC_041767.1	61904401	61904800	LOC106996374
NC_041767.1	62094201	62094400	LOC106996374
NC_041767.1	61905601	61906000	LOC106996374
NC_041765.1	17638601	17638800	LOC114669721
NC_041765.1	17641001	17641400	LOC114669721
NC_041754.1	95238801	95239000	LOC114670433
NC_041754.1	95237601	95238000	LOC114670433
NC_041765.1	58101801	58102200	LOC114671351
NC_041765.1	58109401	58110000	LOC114671351
NC_041765.1	58123201	58123600	LOC114671351
NC_041766.1	4383801	4384200	LOC114672050
NC_041767.1	309201	309400	LOC114672190
NC_041773.1	53069001	53069600	LOC114674310
NC_041773.1	53289401	53290000	LOC114674310
NC_041773.1	53334001	53334800	LOC114674310
NC_041773.1	53070001	53070600	LOC114674310
NC_041773.1	53209601	53210200	LOC114674310
NC_041773.1	53078801	53079400	LOC114674310
NC_041773.1	53085601	53086000	LOC114674310
NC_041773.1	53101601	53101800	LOC114674310
NC_041773.1	53257801	53258200	LOC114674310
NC_041773.1	53232001	53232400	LOC114674310
NC_041754.1	222926601	222927000	LOC114674455
NC_041754.1	222917001	222917200	LOC114674455
NW_021160161.1	241401	241800	LOC114675364
NW_021160293.1	21001	21400	LOC114675515
NC_041756.1	164728601	164729000	LOC114677044
NC_041756.1	164729401	164729800	LOC114677044
NC_041756.1	164722601	164722800	LOC114677044
NC_041756.1	164740401	164740800	LOC114677044
NC_041754.1	103199401	103199800	LOC114677350
NC_041757.1	21359801	21360200	LOC114677470
NC_041757.1	21310601	21311000	LOC114677470
NC_041774.1	49376001	49376400	LOC693330
NC_041756.1	133693001	133693200	LOC693802
NC_041756.1	133696001	133696400	LOC693802
NC_041756.1	133680401	133681000	LOC693802
NC_041756.1	133617601	133618200	LOC693802
NC_041756.1	133688601	133689000	LOC693802
NC_041756.1	133612401	133612800	LOC693802
NC_041756.1	133605801	133606000	LOC693802
NC_041767.1	13017201	13017600	LOC694706
NC_041762.1	70625801	70626400	LOC696151
NC_041762.1	70589801	70590400	LOC696151
NC_041762.1	70714401	70714600	LOC696151
NC_041756.1	129917201	129917800	LOC696504
NC_041756.1	130084001	130084400	LOC696504
NC_041756.1	130007401	130007800	LOC696504
NC_041756.1	129995801	129996200	LOC696504
NC_041756.1	129942201	129942600	LOC696504
NC_041756.1	130042801	130043400	LOC696504
NC_041756.1	130019401	130019800	LOC696504
NC_041756.1	130103401	130103800	LOC696504
NC_041756.1	129997401	129997800	LOC696504
NC_041770.1	59113401	59113800	LOC696854
NC_041761.1	106176401	106176800	LOC696935
NC_041761.1	106225601	106226000	LOC696935
NC_041761.1	106153401	106153800	LOC696935
NC_041761.1	106212601	106213200	LOC696935
NC_041761.1	106033201	106033400	LOC696935
NC_041761.1	106205801	106206200	LOC696935
NC_041761.1	106164601	106165000	LOC696935
NC_041761.1	106142601	106142800	LOC696935
NC_041765.1	60857401	60857800	LOC696959
NC_041765.1	60862601	60863000	LOC696959
NC_041759.1	110396601	110397200	LOC698520
NC_041760.1	47058201	47058400	LOC698792
NC_041760.1	47067201	47067600	LOC698792
NC_041760.1	47136401	47136800	LOC698792
NC_041760.1	47059201	47059800	LOC698792
NC_041760.1	47026201	47026600	LOC698792
NC_041760.1	47142601	47143000	LOC698792
NC_041760.1	47143601	47144200	LOC698792
NC_041760.1	47033801	47034200	LOC698792
NC_041760.1	47024601	47024800	LOC698792
NC_041760.1	47165601	47166000	LOC698792
NC_041760.1	47177801	47178200	LOC698792
NC_041760.1	47173601	47173800	LOC698792
NC_041760.1	47152001	47152400	LOC698792
NC_041760.1	47129801	47130400	LOC698792
NC_041760.1	47084001	47084400	LOC698792
NC_041760.1	47175601	47176000	LOC698792
NC_041760.1	47110001	47110200	LOC698792
NC_041760.1	47017601	47017800	LOC698792
NC_041760.1	47129401	47129600	LOC698792
NC_041760.1	47140001	47140200	LOC698792
NC_041760.1	47187001	47187600	LOC698792
NC_041760.1	47213401	47213800	LOC698792
NC_041760.1	47212201	47212400	LOC698792
NC_041760.1	47244001	47244400	LOC698792
NC_041760.1	47114001	47114400	LOC698792
NC_041760.1	47219401	47219800	LOC698792
NC_041760.1	47106601	47106800	LOC698792
NC_041760.1	47125601	47126000	LOC698792
NC_041760.1	47137001	47137400	LOC698792
NC_041760.1	47108401	47108800	LOC698792
NC_041760.1	47016201	47016800	LOC698792
NC_041760.1	47096801	47097200	LOC698792
NC_041760.1	47185001	47185400	LOC698792
NC_041760.1	47239401	47239600	LOC698792
NC_041758.1	85190001	85190600	LOC700233
NC_041758.1	85207401	85207800	LOC700233
NC_041758.1	85184001	85184600	LOC700233
NC_041758.1	85231801	85232400	LOC700233
NC_041761.1	96533801	96534200	LOC701223
NC_041774.1	42913401	42914000	LOC701494
NC_041758.1	58355401	58356000	LOC701691
NC_041758.1	58352201	58352600	LOC701691
NC_041758.1	58474801	58475400	LOC701691
NC_041758.1	58402601	58403200	LOC701691
NC_041758.1	58466001	58466400	LOC701691
NC_041758.1	58437401	58437800	LOC701691
NC_041758.1	58486401	58487000	LOC701691
NC_041770.1	24166601	24167000	LOC702606
NC_041774.1	55070601	55071000	LOC703127
NC_041774.1	45887601	45888200	LOC703919
NC_041764.1	53463601	53464200	LOC703968
NC_041756.1	60316001	60316400	LOC705465
NC_041763.1	70567601	70568000	LOC705546
NC_041763.1	70577201	70577400	LOC705546
NC_041756.1	94815001	94815400	LOC707358
NC_041761.1	22831601	22832000	LOC709045
NC_041761.1	22844201	22844600	LOC709045
NC_041754.1	132933201	132933600	LOC711043
NC_041754.1	122875801	122876000	LOC712614
NC_041754.1	122866401	122866800	LOC712614
NC_041754.1	122782801	122783400	LOC712614
NC_041754.1	122650601	122651000	LOC712614
NC_041754.1	122729401	122729600	LOC712614
NC_041754.1	122826001	122826400	LOC712614
NC_041754.1	122689201	122689400	LOC712614
NC_041754.1	122687801	122688200	LOC712614
NC_041754.1	122639401	122640000	LOC712614
NC_041754.1	122740201	122740400	LOC712614
NC_041768.1	64505401	64505800	LOC712661
NC_041768.1	64503401	64503800	LOC712661
NC_041768.1	64490801	64491200	LOC712661
NC_041768.1	64509201	64509800	LOC712661
NC_041768.1	64843801	64844200	LOC712840
NC_041757.1	109283801	109284000	LOC713695
NC_041757.1	109276001	109276600	LOC713695
NC_041755.1	157625801	157626200	LOC713714
NC_041755.1	157952801	157953200	LOC713714
NC_041755.1	157878001	157878400	LOC713714
NC_041755.1	157871401	157871800	LOC713714
NC_041755.1	158014601	158015000	LOC713714
NC_041755.1	157659601	157660000	LOC713714
NC_041755.1	157658201	157658800	LOC713714
NC_041755.1	157665401	157665800	LOC713714
NC_041755.1	157983801	157984200	LOC713714
NC_041755.1	157908001	157908200	LOC713714
NC_041755.1	157837601	157838000	LOC713714
NC_041755.1	157934601	157935000	LOC713714
NC_041755.1	157945201	157945600	LOC713714
NC_041755.1	157673401	157673800	LOC713714
NC_041755.1	157635401	157635800	LOC713714
NC_041755.1	157701201	157701600	LOC713714
NC_041755.1	158026201	158026600	LOC713714
NC_041755.1	157633801	157634200	LOC713714
NC_041755.1	157706201	157706400	LOC713714
NC_041755.1	157668601	157669400	LOC713714
NC_041755.1	157693801	157694200	LOC713714
NC_041755.1	157832801	157833200	LOC713714
NC_041755.1	157667801	157668400	LOC713714
NC_041755.1	157629401	157629800	LOC713714
NC_041755.1	157811201	157811600	LOC713714
NC_041755.1	157671601	157671800	LOC713714
NC_041755.1	157826601	157827200	LOC713714
NC_041755.1	157701801	157702200	LOC713714
NC_041755.1	157821801	157822200	LOC713714
NC_041755.1	157795201	157795400	LOC713714
NC_041755.1	157686201	157686400	LOC713714
NC_041768.1	68935401	68935800	LOC713984
NC_041757.1	103594001	103594200	LOC714656
NC_041757.1	103566801	103567000	LOC714656
NC_041757.1	103379601	103380200	LOC714656
NC_041757.1	103406601	103407200	LOC714656
NC_041757.1	103557201	103557600	LOC714656
NC_041757.1	103571801	103572400	LOC714656
NC_041757.1	103301801	103302000	LOC714656
NC_041757.1	103308801	103309400	LOC714656
NC_041757.1	103387601	103388000	LOC714656
NC_041757.1	103355801	103356000	LOC714656
NC_041757.1	103330601	103330800	LOC714656
NC_041757.1	103356401	103356800	LOC714656
NC_041757.1	103296201	103296800	LOC714656
NC_041760.1	77641801	77642400	LOC715855
NC_041760.1	77567001	77567600	LOC715855
NC_041760.1	77615401	77616000	LOC715855
NC_041760.1	77571001	77571600	LOC715855
NC_041754.1	95354201	95354400	LOC717842
NC_041754.1	95352801	95353000	LOC717842
NC_041772.1	52270201	52270400	LOC720244
NC_041761.1	23651601	23651800	LOXL2
NC_041754.1	113203401	113203600	LRIF1
NC_041758.1	3678001	3678400	LRPAP1
NC_041758.1	3666401	3666800	LRPAP1
NC_041766.1	64809001	64809400	LRPPRC
NC_041766.1	64778601	64779200	LRPPRC
NC_041766.1	64801801	64802000	LRPPRC
NC_041766.1	64793001	64793600	LRPPRC
NC_041766.1	64813801	64814200	LRPPRC
NC_041766.1	64795801	64796200	LRPPRC
NC_041756.1	82650001	82650400	LSM5
NC_041764.1	10808401	10808800	M6PR
NC_041764.1	10807001	10807400	M6PR
NC_041764.1	10805801	10806200	M6PR
NC_041764.1	10784801	10785200	M6PR
NC_041764.1	10810201	10810800	M6PR
NC_041763.1	68040201	68040600	MAPRE1
NC_041756.1	45041001	45041800	MDH2
NC_041754.1	195466201	195466400	MECR
NC_041769.1	51177401	51177600	MED24
NC_041769.1	51184601	51185600	MED24
NC_041762.1	128561201	128561600	MKI67
NC_041762.1	128571201	128571800	MKI67
NC_041762.1	128526201	128526400	MKI67
NC_041762.1	128516801	128517200	MKI67
NC_041763.1	56124001	56124800	MKKS
NC_041763.1	56130401	56130600	MKKS
NC_041769.1	34481201	34481400	MRM1
NC_041769.1	34442201	34442800	MRM1
NC_041758.1	55863801	55864000	MRPL1
NC_041758.1	55862401	55862800	MRPL1
NC_041773.1	394201	394600	MRPL28
NC_041756.1	72202401	72202800	MRPL32
NC_041756.1	72218801	72219200	MRPL32
NC_041756.1	72189401	72189800	MRPL32
NC_041756.1	72221601	72222200	MRPL32
NC_041756.1	72198801	72199000	MRPL32
NC_041756.1	72222601	72223800	MRPL32
NC_041766.1	81208001	81208600	MRPL33
NC_041766.1	81211001	81211400	MRPL33
NC_041769.1	72289201	72289600	MRPL38
NC_041769.1	72279201	72279600	MRPL38
NC_041769.1	49335401	49335800	MRPL45
NC_041754.1	188121401	188121800	MRPS15
NC_041754.1	188109401	188110000	MRPS15
NC_041756.1	58941201	58941600	MRPS17
NC_041756.1	58970001	58970200	MRPS17
NC_041756.1	58948401	58948800	MRPS17
NC_041756.1	58934001	58934200	MRPS17
NC_041755.1	146405201	146405600	MRPS25
NC_041755.1	146395601	146396200	MRPS25
NC_041755.1	146400801	146401200	MRPS25
NC_041755.1	146403401	146403800	MRPS25
NC_041755.1	146409601	146410000	MRPS25
NC_041755.1	146381401	146381800	MRPS25
NC_041759.1	69090001	69090400	MRPS27
NC_041759.1	69122001	69122200	MRPS27
NC_041759.1	69092601	69093000	MRPS27
NC_041759.1	69065601	69066000	MRPS27
NC_041759.1	69084201	69084600	MRPS27
NC_041759.1	69068201	69068400	MRPS27
NC_041759.1	45162201	45162400	MRPS30
NC_041759.1	44770801	44771000	MRPS30
NC_041759.1	45129601	45130000	MRPS30
NC_041759.1	44975601	44976000	MRPS30
NC_041759.1	45026601	45027000	MRPS30
NC_041759.1	45002001	45002400	MRPS30
NC_041759.1	45112601	45113000	MRPS30
NC_041759.1	45220601	45220800	MRPS30
NC_041759.1	45127601	45128200	MRPS30
NC_041759.1	45048001	45048400	MRPS30
NC_041759.1	44855401	44855600	MRPS30
NC_041766.1	155201	155400	MRPS5
NC_041766.1	150201	150600	MRPS5
NC_041766.1	154601	154800	MRPS5
NC_041768.1	20459001	20459400	MRRF
NC_041768.1	20423401	20423800	MRRF
NC_041768.1	20396801	20397000	MRRF
NC_041768.1	20398001	20398200	MRRF
NC_041767.1	18080801	18081000	MTCH2
NC_041767.1	18103001	18103600	MTCH2
NC_041763.1	21108801	21109200	MTFP1
NC_041763.1	21097401	21097800	MTFP1
NC_041762.1	133869601	133869800	MTG1
NC_041760.1	126432601	126433200	MTHFD1
NC_041760.1	126448801	126449400	MTHFD1
NC_041760.1	126479001	126479400	MTHFD1
NC_041760.1	126422801	126423000	MTHFD1
NC_041760.1	126414201	126414600	MTHFD1
NC_041765.1	63517401	63517800	MTX2
NC_041765.1	63545001	63545600	MTX2
NC_041765.1	63416001	63416400	MTX2
NC_041765.1	63389201	63389600	MTX2
NC_041765.1	63477601	63477800	MTX2
NC_041765.1	63535601	63536000	MTX2
NC_041765.1	63519601	63520000	MTX2
NC_041765.1	63433601	63433800	MTX2
NC_041765.1	63530801	63531400	MTX2
NC_041765.1	63494201	63494600	MTX2
NC_041772.1	4615401	4615800	MYDGF
NC_041772.1	4593601	4594000	MYDGF
NC_041756.1	17813801	17814200	N6AMT1
NC_041756.1	17810601	17810800	N6AMT1
NC_041756.1	17814401	17814800	N6AMT1
NC_041764.1	111774601	111775000	NAA25
NC_041764.1	111814201	111814600	NAA25
NC_041764.1	7988001	7988400	NANOG
NC_041764.1	8012001	8012200	NANOG
NC_041764.1	4752801	4753000	NDUFA9
NC_041764.1	4774401	4774800	NDUFA9
NC_041765.1	88351601	88352000	NDUFB3
NC_041772.1	14193201	14193800	NDUFB7
NC_041767.1	71172801	71173200	NDUFC2
NC_041767.1	6905401	6905800	NDUFV1
NC_041767.1	6906201	6906600	NDUFV1
NC_041756.1	58999401	58999800	NIPSNAP2
NC_041754.1	89825201	89825800	NIT1
NC_041772.1	54670801	54671000	NLRP7
NC_041765.1	38452601	38453000	NMI
NC_041764.1	132027601	132028000	NOC4L
NC_041764.1	131998601	131999000	NOC4L
NC_041764.1	132026801	132027000	NOC4L
NC_041764.1	131973801	131974400	NOC4L
NC_041764.1	132002401	132003000	NOC4L
NC_041766.1	35607801	35608200	NOTO
NC_041766.1	35595801	35596600	NOTO
NC_041756.1	35347601	35348000	NUDT1
NC_041773.1	4786401	4786800	NUDT16L1
NC_041773.1	4784201	4784600	NUDT16L1
NC_041762.1	13336001	13336200	NUDT5
NC_041764.1	68206801	68207000	NUP107
NC_041764.1	68220401	68220800	NUP107
NC_041764.1	68209601	68210200	NUP107
NC_041764.1	68213801	68214200	NUP107
NC_041764.1	68218801	68219200	NUP107
NC_041762.1	124830001	124830400	OAT
NC_041762.1	124826001	124826800	OAT
NC_041765.1	61348001	61348400	OLA1
NC_041755.1	21861001	21861400	OXSM
NC_041755.1	21845601	21845800	OXSM
NC_041755.1	21848801	21849400	OXSM
NC_041755.1	21779601	21779800	OXSM
NC_041755.1	21766201	21766400	OXSM
NC_041755.1	21866201	21866600	OXSM
NC_041755.1	21797401	21797600	OXSM
NC_041774.1	54813401	54814000	PAGE2B
NC_041759.1	132382001	132382400	PCBD2
NC_041759.1	132379401	132379800	PCBD2
NC_041764.1	46745401	46745800	PCED1B
NC_041764.1	46749201	46750000	PCED1B
NC_041764.1	46736401	46736800	PCED1B
NC_041764.1	46623401	46623800	PCED1B
NC_041764.1	46769001	46769400	PCED1B
NC_041764.1	46770801	46771000	PCED1B
NC_041764.1	46784001	46784600	PCED1B
NC_041764.1	46783401	46783800	PCED1B
NC_041760.1	40871801	40872200	PCLAF
NC_041772.1	33918001	33918200	PDCD2L
NC_041772.1	33920201	33920600	PDCD2L
NC_041772.1	33899001	33899600	PDCD2L
NC_041755.1	114609401	114609800	PDHB
NC_041770.1	11655601	11656200	PDS5B
NC_041770.1	11583001	11583400	PDS5B
NC_041770.1	11594401	11595000	PDS5B
NC_041770.1	11641201	11641600	PDS5B
NC_041763.1	48330201	48330600	PET117
NC_041763.1	48349201	48349800	PET117
NC_041763.1	48370201	48371000	PET117
NC_041763.1	48383801	48384200	PET117
NC_041754.1	197991401	197992000	PIGV
NC_041754.1	197964401	197964800	PIGV
NC_041754.1	197992801	197993200	PIGV
NC_041754.1	197980401	197981400	PIGV
NC_041754.1	198000401	198000600	PIGV
NC_041754.1	197981801	197982400	PIGV
NC_041754.1	197971401	197971800	PIGV
NC_041754.1	198002001	198002400	PIGV
NC_041756.1	129599201	129599800	PMPCB
NC_041766.1	52879001	52879200	PNPT1
NC_041766.1	52944001	52944200	PNPT1
NC_041766.1	52959001	52959400	PNPT1
NC_041766.1	52931001	52931600	PNPT1
NC_041760.1	111903801	111904200	POLE2
NC_041772.1	35547601	35547800	POLR2I
NC_041772.1	35551401	35552000	POLR2I
NC_041772.1	392401	392600	POLRMT
NC_041772.1	401601	402200	POLRMT
NC_041772.1	383201	384200	POLRMT
NC_041772.1	380801	381200	POLRMT
NC_041772.1	379801	380200	POLRMT
NC_041761.1	43726401	43727000	POMK
NC_041772.1	37482001	37482400	PPP1R14A
NC_041772.1	37486401	37486600	PPP1R14A
NC_041761.1	31083201	31083400	PPP2CB
NC_041761.1	31091201	31091400	PPP2CB
NC_041761.1	31095001	31095400	PPP2CB
NC_041761.1	31100601	31101200	PPP2CB
NC_041754.1	69769401	69769800	PPP2R5A
NC_041772.1	46388001	46388600	PPP5C
NC_041772.1	46391001	46391400	PPP5C
NC_041754.1	184470401	184471400	PPT1
NC_041754.1	184483001	184483800	PPT1
NC_041754.1	184512401	184512600	PPT1
NC_041754.1	184477801	184478200	PPT1
NC_041761.1	48469001	48469200	PRKDC
NC_041761.1	48471401	48471800	PRKDC
NC_041761.1	48457201	48457600	PRKDC
NC_041761.1	48467601	48468200	PRKDC
NC_041761.1	48466401	48466800	PRKDC
NC_041761.1	48502401	48502600	PRKDC
NC_041761.1	48451801	48452200	PRKDC
NC_041761.1	48487801	48488200	PRKDC
NC_041761.1	48463801	48464200	PRKDC
NC_041761.1	48464601	48465200	PRKDC
NC_041761.1	48414001	48414400	PRKDC
NC_041761.1	48445601	48445800	PRKDC
NC_041767.1	45164801	45165200	PRMT3
NC_041767.1	45118801	45119200	PRMT3
NC_041767.1	45117401	45117800	PRMT3
NC_041762.1	57768401	57768800	PRXL2A
NC_041762.1	57732401	57732600	PRXL2A
NC_041767.1	51066201	51067000	PSMA1
NC_041767.1	51049001	51050400	PSMA1
NC_041767.1	51080201	51080800	PSMA1
NC_041767.1	51063801	51064200	PSMA1
NC_041767.1	51091401	51091800	PSMA1
NC_041767.1	51079601	51079800	PSMA1
NC_041768.1	16312601	16312800	PSMB7
NC_041760.1	152405001	152405400	PSMC1
NC_041760.1	152425201	152425400	PSMC1
NC_041765.1	48365201	48365400	PSMD14
NC_041765.1	48293401	48293600	PSMD14
NC_041765.1	48348401	48349000	PSMD14
NC_041765.1	48302601	48303000	PSMD14
NC_041765.1	48333401	48334000	PSMD14
NC_041766.1	54700001	54700400	PSME4
NC_041764.1	69297401	69297800	RAB3IP
NC_041765.1	125203601	125204000	RBM44
NC_041765.1	125184401	125184800	RBM44
NC_041768.1	4851801	4852200	REXO4
NC_041768.1	4849201	4849600	REXO4
NC_041767.1	64889401	64889600	RNF121
NC_041767.1	64907401	64907600	RNF121
NC_041767.1	64907801	64908200	RNF121
NC_041767.1	64892801	64893400	RNF121
NC_041755.1	75752001	75752400	RPL22L1
NC_041755.1	75760801	75761200	RPL22L1
NC_041755.1	75750401	75750800	RPL22L1
NC_041759.1	170336401	170336600	RPL26L1
NC_041759.1	170359401	170359600	RPL26L1
NC_041759.1	170327401	170327800	RPL26L1
NC_041763.1	72406201	72406600	RPN2
NC_041763.1	72423801	72424200	RPN2
NC_027914.1	119001	119400	RPS4Y1
NC_027914.1	136601	137000	RPS4Y1
NC_027914.1	127401	127800	RPS4Y1
NC_027914.1	126601	127000	RPS4Y1
NC_027914.1	142601	142800	RPS4Y1
NC_027914.1	139601	140000	RPS4Y1
NC_027914.1	114201	114400	RPS4Y1
NC_027914.1	134401	134600	RPS4Y1
NC_027914.1	6045801	6046200	RPS4Y2
NC_041757.1	162889001	162889200	RREB1
NC_041757.1	162879401	162879800	RREB1
NC_041757.1	162969601	162970400	RREB1
NC_041757.1	162858601	162859200	RREB1
NC_041757.1	162987801	162988000	RREB1
NC_041757.1	162907601	162908200	RREB1
NC_041757.1	162941201	162942000	RREB1
NC_041757.1	162909401	162910000	RREB1
NC_041767.1	12729601	12730000	SDHAF2
NC_041766.1	89367401	89367800	SDHD
NC_041766.1	89440401	89440600	SDHD
NC_041766.1	89435801	89436200	SDHD
NC_041766.1	89507401	89507800	SDHD
NC_041771.1	21045801	21046200	SEC11C
NC_041771.1	21108801	21109200	SEC11C
NC_041771.1	21104801	21105600	SEC11C
NC_041762.1	14515601	14516000	SEPHS1
NC_041762.1	14520801	14521200	SEPHS1
NC_041762.1	50280401	50280800	SHLD2
NC_041762.1	50261401	50261800	SHLD2
NC_041762.1	50271201	50271800	SHLD2
NC_041762.1	50269201	50269800	SHLD2
NC_041769.1	18187201	18187600	SHMT1
NC_041757.1	36340201	36340600	SLC18B1
NC_041757.1	36339601	36340000	SLC18B1
NC_041763.1	61565801	61566200	SLC23A2
NC_041763.1	61586801	61587200	SLC23A2
NC_041764.1	98349601	98349800	SLC25A3
NC_041764.1	98347601	98348000	SLC25A3
NC_041768.1	12233801	12234400	SLC27A4
NC_041769.1	47095801	47096200	SLC35B1
NC_041769.1	47094601	47095000	SLC35B1
NC_041769.1	47073001	47073400	SLC35B1
NC_041757.1	161646201	161646400	SLC35B3
NC_041757.1	161640801	161641000	SLC35B3
NC_041757.1	161668201	161668800	SLC35B3
NC_041764.1	104617001	104617200	SLC41A2
NC_041774.1	149686201	149687000	SLC6A8
NC_041774.1	149681201	149681600	SLC6A8
NC_041759.1	99483001	99483400	SLCO4C1
NC_041759.1	99484401	99484600	SLCO4C1
NC_041759.1	99491001	99491200	SLCO4C1
NC_041759.1	99669801	99670000	SLCO4C1
NC_041759.1	99596801	99597200	SLCO4C1
NC_041759.1	99654601	99655200	SLCO4C1
NC_041759.1	99707401	99707800	SLCO4C1
NC_041759.1	99521201	99521600	SLCO4C1
NC_041759.1	99502001	99502400	SLCO4C1
NC_041759.1	99524401	99524600	SLCO4C1
NC_041759.1	99407001	99407400	SLCO4C1
NC_041759.1	99693201	99693600	SLCO4C1
NC_041759.1	99318001	99318600	SLCO4C1
NC_041759.1	99687601	99688000	SLCO4C1
NC_041759.1	99660001	99660800	SLCO4C1
NC_041759.1	99398001	99398200	SLCO4C1
NC_041759.1	99274801	99275200	SLCO4C1
NC_041759.1	99342401	99342800	SLCO4C1
NC_041760.1	139847601	139848200	SLIRP
NC_041760.1	35364001	35364400	SLTM
NC_041760.1	35342201	35342400	SLTM
NC_041758.1	92659001	92659600	SMARCAD1
NC_041758.1	92641601	92642000	SMARCAD1
NC_041758.1	92671001	92671200	SMARCAD1
NC_041767.1	86733201	86733800	SMCO4
NC_041758.1	24906001	24906200	SMIM20
NC_041759.1	52815401	52815800	SNX18
NC_041759.1	52887801	52888600	SNX18
NC_041759.1	52866001	52866600	SNX18
NC_041759.1	52907201	52907800	SNX18
NC_041759.1	52849001	52849400	SNX18
NC_041755.1	86870801	86871400	SOX2
NC_041755.1	86909401	86909800	SOX2
NC_041755.1	86988001	86988400	SOX2
NC_041760.1	41491801	41492200	SPG21
NC_041760.1	41538801	41539400	SPG21
NC_041760.1	41486201	41486600	SPG21
NC_041760.1	41490001	41490400	SPG21
NC_041760.1	41501201	41501600	SPG21
NC_041764.1	101315001	101315200	SPIC
NC_041760.1	139767201	139767600	SPTLC2
NC_041760.1	139769801	139770000	SPTLC2
NC_041754.1	213374201	213374600	SRM
NC_041754.1	213379801	213380400	SRM
NC_041755.1	177417401	177418000	ST3GAL6
NC_041755.1	177416401	177416600	ST3GAL6
NC_041755.1	177408801	177409200	ST3GAL6
NC_041755.1	177410001	177410600	ST3GAL6
NC_041768.1	21360401	21360800	STOM
NC_041756.1	1885801	1886800	SUMO3
NC_041756.1	1898401	1898600	SUMO3
NC_041769.1	28234401	28234800	SUZ12
NC_041769.1	28226201	28226800	SUZ12
NC_041769.1	60045201	60045400	TACO1
NC_041769.1	60043001	60043400	TACO1
NC_041754.1	100716401	100716800	TARS2
NC_041754.1	100668201	100668600	TARS2
NC_041761.1	124916201	124916800	TATDN1
NC_041761.1	124957601	124958200	TATDN1
NC_041761.1	124879201	124879400	TATDN1
NC_041761.1	124834601	124834800	TATDN1
NC_041761.1	124884801	124885200	TATDN1
NC_041761.1	124931401	124931800	TATDN1
NC_041761.1	124914801	124915000	TATDN1
NC_041761.1	124873801	124874400	TATDN1
NC_041761.1	124871201	124871600	TATDN1
NC_041761.1	124883801	124884200	TATDN1
NC_041761.1	124881801	124882200	TATDN1
NC_041761.1	124950201	124950600	TATDN1
NC_041761.1	124908401	124909000	TATDN1
NC_041764.1	3120801	3121200	TEAD4
NC_041764.1	3053601	3053800	TEAD4
NC_041764.1	3131001	3131600	TEAD4
NC_041764.1	3080001	3080600	TEAD4
NC_041762.1	79616401	79616600	TFAM
NC_041762.1	79625801	79626200	TFAM
NC_041757.1	61654001	61654400	TFB1M
NC_041757.1	61682001	61682400	TFB1M
NC_041754.1	81524601	81525400	TIMM8B
NC_041754.1	81513801	81514200	TIMM8B
NC_041760.1	56639001	56639400	TMED3
NC_041767.1	78874401	78874800	TMEM126A
NC_041757.1	159227001	159227200	TMEM14B
NC_041757.1	159275201	159275400	TMEM14B
NC_041757.1	159254601	159255200	TMEM14B
NC_041757.1	159225201	159225400	TMEM14B
NC_041758.1	78224401	78225000	TMEM165
NC_041758.1	78201201	78201600	TMEM165
NC_041765.1	11724201	11724400	TMEM37
NC_041755.1	175648601	175649000	TMEM45A
NC_041755.1	175607401	175607600	TMEM45A
NC_041755.1	175565801	175566200	TMEM45A
NC_041755.1	175632201	175632600	TMEM45A
NC_041755.1	175593601	175594600	TMEM45A
NC_041755.1	175601401	175602200	TMEM45A
NC_041761.1	143574801	143575200	TOP1MT
NC_041754.1	43578201	43578400	TPR
NC_041763.1	25013401	25013600	TPST2
NC_041768.1	26120001	26120200	TRIM32
NC_041768.1	25889001	25889200	TRIM32
NC_041768.1	25887601	25888000	TRIM32
NC_041768.1	26061801	26062000	TRIM32
NC_041768.1	26077801	26078200	TRIM32
NC_041768.1	25961001	25961600	TRIM32
NC_041768.1	25934601	25935000	TRIM32
NC_041768.1	25965801	25966200	TRIM32
NC_041768.1	25876201	25876600	TRIM32
NC_041768.1	25890401	25890800	TRIM32
NC_041768.1	26129201	26129600	TRIM32
NC_041762.1	57720801	57721200	TSPAN14
NC_041762.1	57718201	57719000	TSPAN14
NC_041762.1	57716401	57716600	TSPAN14
NC_041761.1	143885801	143886000	TSTA3
NC_041757.1	139181801	139182200	TUBB
NC_041772.1	6439401	6440200	TUBB4A
NC_041772.1	6446201	6446600	TUBB4A
NC_041768.1	2329601	2329800	UBAC1
NC_041756.1	183144001	183144200	UBE3C
NC_041756.1	183102201	183102800	UBE3C
NC_041756.1	183131401	183131800	UBE3C
NC_041756.1	183098201	183098600	UBE3C
NC_041754.1	94936001	94936400	UBQLN4
NC_041772.1	1419801	1420200	UQCR
NC_041772.1	1419201	1419600	UQCR
NC_041772.1	1420801	1421200	UQCR
NC_041756.1	71251001	71251400	URGCP
NC_041772.1	29410201	29410600	URI1
NC_041772.1	29366601	29367400	URI1
NC_041772.1	29341201	29341400	URI1
NC_041759.1	70456201	70456600	UTP15
NC_041762.1	62599001	62599200	VDAC2
NC_041761.1	144733401	144733600	VPS28
NC_041760.1	18724001	18724800	VPS39
NC_041765.1	90277801	90278200	WDR12
NC_041772.1	748201	748600	WDR18
NC_041772.1	761801	762200	WDR18
NC_041772.1	754801	755400	WDR18
NC_041772.1	733801	734000	WDR18
NC_041756.1	3833801	3834400	WDR4
NC_041756.1	3800801	3801000	WDR4
NC_041756.1	3841201	3841600	WDR4
NC_041755.1	105079001	105079600	WDR6
NC_041760.1	63813601	63814000	WDR73
NC_041755.1	51735001	51735200	WWTR1
NC_041755.1	51778601	51779000	WWTR1
NC_041755.1	51756201	51756800	WWTR1
NC_041755.1	51757001	51757600	WWTR1
NC_041755.1	51770401	51770800	WWTR1
NC_041755.1	51765601	51766200	WWTR1
NC_041755.1	51747001	51747400	WWTR1
NC_041762.1	110469801	110470400	XPNPEP1
NC_041762.1	110410601	110411000	XPNPEP1
NC_041762.1	110448401	110448800	XPNPEP1
NC_041762.1	110376201	110376800	XPNPEP1
NC_041762.1	110403601	110404200	XPNPEP1
NC_041762.1	110336201	110336800	XPNPEP1
NC_041762.1	110408401	110408600	XPNPEP1
NC_041754.1	191832401	191832800	YARS
NC_041767.1	8263601	8264200	YIF1A
NC_041765.1	106646001	106646400	ZFAND2B
NC_041765.1	106634801	106635400	ZFAND2B
NC_041762.1	98180001	98180400	ZFYVE27
NC_041754.1	189526801	189527200	ZMYM1
NC_041754.1	189507201	189507600	ZMYM1
NC_041754.1	189512201	189512400	ZMYM1
NC_041754.1	189539401	189539800	ZMYM1
NC_041763.1	82520201	82520400	ZMYND8
NC_041763.1	82413801	82414200	ZMYND8
NC_041763.1	82493801	82494200	ZMYND8
NC_041763.1	82463401	82463800	ZMYND8
NC_041763.1	82523001	82523400	ZMYND8
NC_041763.1	82448801	82449200	ZMYND8
NC_041763.1	82346201	82346600	ZMYND8
NC_041763.1	82588601	82589200	ZMYND8
NC_041763.1	82562801	82563200	ZMYND8
NC_041763.1	82341001	82341600	ZMYND8
NC_041763.1	82617001	82617400	ZMYND8
NC_041763.1	82574801	82575200	ZMYND8
NC_041763.1	82410601	82411000	ZMYND8
NC_041763.1	82619801	82620200	ZMYND8
NC_041763.1	82320801	82321000	ZMYND8
NC_041763.1	82536601	82537200	ZMYND8
NC_041763.1	82613601	82614000	ZMYND8
NC_041764.1	132899801	132900000	ZNF140
NC_041764.1	132868001	132868400	ZNF140
NC_041764.1	132876001	132876200	ZNF140
NC_041754.1	134399601	134400000	ZNF326
NC_041754.1	134400401	134401000	ZNF326
NC_041754.1	134417001	134417600	ZNF326
NC_041754.1	134385801	134386000	ZNF326
NC_041767.1	109843601	109844200	ZPR1
